# Supplementary material for: Tissue-specific modulation of gene expression in response to lowered insulin signalling in Drosophila
Source: eLife. 2021 Apr 21;10:e67275. doi: 10.7554/eLife.67275 (PMC8060030; doi:10.7554/eLife.67275)
Supplement: Source data 1. [file elife-67275-data1.xlsx]

## Sheet: Sheet1
Supplementary Figure 5A	+/FB-Gal4	+/MCM6	FB>MCM6		Figure 4E	+/MCM6	+/FB-Gal4	FB>MCM6		Figure 5H	+/NP1Gal4	+/UAS-LManV	NP1Gal4>UAS-LManV			Supplementary Figure 5B	+/NP1Gal4	+/UAS-LManV	NP1Gal4>UAS-LManV
day					day					day						day
0	1	1	1		0	1	1	1		0	1	1	1			0	1	1	1
19	1	1	1		7	1	1	1		15	0.99375	1	1			15	0.993769	1	1
21	1	0.993421	1		14	1	1	1		20	0.987169	1	1			20	0.993769	0.985481	1
23	1	0.993421	1		19	1	1	1		22	0.987169	1	1			22	0.993769	0.978221	1
27	1	0.993421	0.991228		21	0.993151	0.993243	1		25	0.987169	1	0.993289			25	0.981308	0.941924	1
30	1	0.993421	0.991228		24	0.979452	0.993243	1		27	0.987169	1	0.986577			27	0.981308	0.934608	1
32	1	0.993421	0.991228		26	0.965753	0.98644	1		29	0.987169	1	0.986577			29	0.981308	0.927292	1
35	0.993506	0.993421	0.991228		28	0.958904	0.98644	1		32	0.980588	0.979866	0.986577			32	0.981308	0.876081	0.986395
37	0.980519	0.993421	0.991228		31	0.931507	0.979637	1		36	0.980588	0.959732	0.973154			34	0.974998	0.839501	0.986395
39	0.974026	0.993421	0.982456		33	0.910959	0.979637	1		39	0.954263	0.932886	0.959732			36	0.968687	0.802921	0.986395
42	0.967532	0.993421	0.982456		35	0.890411	0.979637	1		41	0.921358	0.865772	0.95302			39	0.886648	0.795606	0.945578
44	0.961039	0.986754	0.982456		38	0.876712	0.972834	0.993056		43	0.901614	0.838926	0.946309			41	0.823542	0.75171	0.918367
46	0.961039	0.986754	0.982456		40	0.869863	0.972834	0.993056		46	0.835803	0.798658	0.919463			43	0.81092	0.707815	0.918367
48	0.954545	0.986754	0.982456		42	0.856164	0.972834	0.993056		48	0.789735	0.765101	0.899329			46	0.791988	0.561496	0.897959
51	0.915584	0.966752	0.964912		45	0.726027	0.938819	0.972222		50	0.776573	0.744966	0.879195			48	0.785678	0.495653	0.897959
53	0.902597	0.966752	0.964912		47	0.691781	0.925213	0.972222		53	0.677856	0.644295	0.765101			50	0.760435	0.451758	0.877551
56	0.857143	0.933416	0.938596		49	0.671233	0.91841	0.965228		55	0.58572	0.604027	0.651007			53	0.653154	0.342019	0.809524
58	0.831169	0.933416	0.903509		51	0.643836	0.904804	0.958233		57	0.40803	0.469799	0.624161			55	0.608979	0.305439	0.782313
60	0.766234	0.900079	0.894737		54	0.561644	0.836773	0.923261		60	0.236921	0.33557	0.47651			57	0.558494	0.261544	0.721088
63	0.61039	0.793403	0.824561		56	0.554795	0.795955	0.916267		62	0.204015	0.302013	0.38255			60	0.293446	0.137173	0.571429
65	0.538961	0.7534	0.77193		59	0.417808	0.687107	0.811351		64	0.125041	0.241611	0.348993			62	0.287135	0.137173	0.530612
67	0.5	0.720064	0.72807		61	0.410959	0.632682	0.783373		66	0.0723924	0.214765	0.33557			64	0.261893	0.10791	0.462585
70	0.207792	0.620055	0.491228		63	0.376712	0.571455	0.76239		69	0.0263245	0.100671	0.174497			66	0.186165	0.0932779	0.346939
72	0.168831	0.573384	0.45614		66	0.226027	0.299334	0.489608		71	0	0.0536913	0.127517			69	0.085194	0.0640142	0.231293
74	0.162338	0.520046	0.412281		69	0.178082	0.265318	0.440647		74		0	0.0805369			71	0.066262	0.0566983	0.163265
77	0.0324675	0.313361	0.131579		70	0.143836	0.2245	0.41267		76			0.0805369			74	0.028398	0.0274347	0.0816327
79	0.0324675	0.260023	0.122807		73	0.0342466	0.0680304	0.272782		78			0.0738255			76	0	0	0.0408163
81	0.0324675	0.153347	0.0789474		75	0.0205479	0.0340152	0.251799		81			0.033557			78			0.0204082
84	0.012987	0.0600053	0.00877193		77	0	0	0.244804		84			0.0134228			81			0
86	0.00649351	0.0466708	0		80			0.118905		85			0
88	0.00649351	0.026669			82			0.0554889
91	0	0.00666726			84			0.047562
93		0			87			0.023781
					88			0
