# Supplementary material for: Tissue-specific modulation of gene expression in response to lowered insulin signalling in Drosophila
Source: eLife. 2021 Apr 21;10:e67275. doi: 10.7554/eLife.67275 (PMC8060030; doi:10.7554/eLife.67275)
Supplement: Supplementary file 2. — Columns listed as: Tissue (Thorax, gut, brain or fat body), Uniprot ID, Flybase ID, Symbol (Gene), Entrez ID, Protein Wolbachia dependent expression (True/False), Protein Wolbachia independent expression (True/False), protein average expression (Label-free quantification intensity), protein dilp logFC (dilp2-3,5 v. wDah), protein dilp p-value (dilp2-3,5 v. wDah), protein dilp FDR (dilp2-3,5 v. wDah), Protein interaction p-value, Protein interaction FDR, RNA interaction p-value, protein TOST. Genotypes denoted as wDah and dilp (2-3,5) with Wolbachia and wDahT and dilpT (2-3,5) without Wolbachia. [file elife-67275-supp2.xlsx]

## Sheet: Sheet1
tissue	uniprot	flybase	symbol	entrez	protein.wolbachiaDependent	protein.wolbachiaIndependent	protein.avgExpr	protein.dilp.logFC	protein.dilp.pvalue	protein.dilp.FDR	protein.dilp.FDR	protein.dilpT.logFC	protein.dilpT.pvalue	protein.dilpT.FDR	protein.interaction.pvalue	protein.interaction.FDR	rna.interaction.pvalue	protein.TOST
fat	Q7JYV3	FBgn0033774	CG12374	36410	TRUE	FALSE	24.49	-6.2	2.1e-11	1.4e-08	1.9e-13	-1.4	0.0042	0.014	2e-07	2.7e-05	4.4e-08	1
fat	Q8T4C9	FBgn0036121	CG6310	39237	FALSE	FALSE	26.88	1.5	7.6e-10	1.4e-07	3.5e-13	0.87	2.1e-06	3.8e-05	0.0025	0.018	0.52	0.94
fat	A1Z8Z9;A8DYB6	FBgn0033733	CG8834	36356	TRUE	FALSE	25.46	-7	4.2e-08	2.6e-06	3e-13	1.5	0.064	0.13	3.7e-07	4e-05	4.4e-08	1
fat	Q7K1W4	FBgn0034406	Jheh3	37182	TRUE	FALSE	26.3	-4.5	4.1e-07	1.2e-05	1.8e-13	-0.00043	1	1	3.3e-05	0.00081	8.1e-06	1
fat	Q9VRS7;Q9VRS3	FBgn0035665	Jon65Aiii	38683	TRUE	FALSE	24.91	-3.5	6.5e-07	1.8e-05	1.5e-17	-0.081	0.86	0.91	6.3e-05	0.0012	6.2e-12	1
fat	P10090	FBgn0003996	w	31271	FALSE	FALSE	24.66	3	4e-05	0.00047	6.5e-32	2.6	0.00016	0.0011	0.64	0.78	0.077	0.51
fat	Q9VRS6	FBgn0250815	Jon65Aiv	38682	FALSE	FALSE	24.67	-2.3	0.0026	0.013	1.3e-19	0.1	0.88	0.91	0.018	0.072	5.6e-12	0.98
fat	Q9VT49	FBgn0036044	Zasp67	39148	FALSE	FALSE	23.51	-0.78	0.23	0.37	1.3e-43	0.18	0.77	0.84	0.29	0.47	0.38	0.75
fat	Q9VRS4	FBgn0040060	yip7	38680	TRUE	FALSE	24.89	-2.8	1.6e-06	3.8e-05	8.4e-13	0.53	0.2	0.3	1.4e-05	0.00042	7.8e-06	1
fat	A1Z7F3	FBgn0033297	Mal-A8	35830	TRUE	FALSE	24.29	-2.9	4.9e-06	8.8e-05	3.7e-13	0.089	0.85	0.89	0.00018	0.0027	2.7e-10	1
fat	Q9VG42	FBgn0038074	Gnmt	41561	FALSE	FALSE	28.42	3.3	5.6e-09	6.6e-07	4e-09	6.6	8e-14	8.6e-11	1e-06	7e-05	0.026	1
fat	Q9V8Y2	FBgn0034468	Obp56a	37264	FALSE	FALSE	29.76	-1.8	8.5e-12	8.3e-09	5.6e-06	-1.1	3.7e-08	1.7e-06	0.00023	0.0032	0.38	0.99
fat	A1Z7F1	FBgn0050360	Mal-A6	246565	TRUE	FALSE	27.5	-4.3	0.00036	0.0027	5.1e-15	2.9	0.0081	0.024	6.1e-05	0.0012	2.8e-13	1
fat	Q9VH58	FBgn0037762	eloF	41211	TRUE	FALSE	27.41	-2.4	2.9e-11	1.4e-08	3.6e-06	-0.36	0.044	0.094	7.6e-08	1.4e-05	0.00073	1
fat	Q9VDT3;Q5BI72	FBgn0038740	CG4562	42362	TRUE	FALSE	24.16	-3.5	6.1e-09	6.9e-07	5.6e-08	0.1	0.77	0.83	6.2e-07	5.1e-05	0.0027	1
fat	Q9VRD0;Q9VRD1	FBgn0011834	Ser6	33073	TRUE	FALSE	24.2	-1.9	5.3e-06	9.6e-05	2.1e-11	0.42	0.17	0.27	3.1e-05	0.00077	7.1e-07	1
fat	P04814	FBgn0003863	alphaTry	48316	TRUE	FALSE	23.63	-2.3	0.00029	0.0023	1.9e-14	0.11	0.83	0.88	0.0037	0.024	8.3e-10	0.99
fat	Q9VVK5	FBgn0036752	Adgf-A	39976	FALSE	FALSE	28.91	-0.62	2.1e-05	0.00029	3.7e-12	-0.4	0.0016	0.0067	0.17	0.33	0.00013	0.22
fat	Q9VKF6	FBgn0032373	Vha100-5	34587	TRUE	FALSE	23.97	-3.7	8e-07	2.2e-05	6.5e-10	-0.3	0.55	0.66	0.00015	0.0023	4.3e-06	1
fat	Q9VKJ0	FBgn0040211	hgo	34552	FALSE	FALSE	30.79	1.3	5.2e-10	1.1e-07	1.6e-06	1.6	4.6e-11	8.4e-09	0.18	0.34	0.05	0.22
fat	B7Z0E0;Q7KUB1;Q7KUB0;Q8IQA7;Q9VSI6	FBgn0001248	Idh	44291	FALSE	TRUE	36.34	0.58	2.2e-10	6e-08	3.4e-06	0.66	2.5e-11	6.1e-09	0.21	0.38	0.041	0.00041
fat	Q9VGT8	FBgn0040256	Ugt86Dd	53507	TRUE	FALSE	25.43	-3.8	9.6e-07	2.5e-05	1.7e-09	1.1	0.049	0.1	3.3e-06	0.00015	0.28	1
fat	Q9VHD2-3;Q9VHD2-2;Q9VHD2	FBgn0037697	GstZ2	41133	FALSE	FALSE	26.95	0.99	1.5e-07	6.1e-06	4.2e-08	0.22	0.076	0.14	0.00023	0.0032	0.0013	0.99
fat	Q9VR51	FBgn0031184	CG14615	33129	FALSE	FALSE	29.98	0.67	1.9e-05	0.00027	9.9e-11	0.32	0.014	0.037	0.045	0.13	0.014	0.53
fat	Q9VD01;Q9VI08	FBgn0038973	Pebp1	42644	TRUE	FALSE	28.44	-6.4	2.5e-07	9.1e-06	2.6e-08	2.4	0.0076	0.023	3.8e-07	4e-05	3.3e-05	1
fat	Q8MZG9	FBgn0033203	CG2070	35706	FALSE	FALSE	30.66	0.59	2.5e-06	5.3e-05	4.6e-09	0.97	2.1e-09	1.9e-07	0.0069	0.036	0.017	0.62
fat	Q0KHY3-2;Q0KHY3;Q0KHY3;Q0KHY3;Q0KHY3	FBgn0051004	mesh	43688	TRUE	FALSE	24.53	-2.8	0.00056	0.0038	1e-12	1.8	0.015	0.039	0.00013	0.0021	8.8e-05	1
fat	Q9VAN0	FBgn0014427	CG11899	46391	FALSE	FALSE	34.71	0.95	5.2e-12	7.5e-09	0.00028	1.5	3.2e-15	1.4e-11	7e-06	0.00025	0.087	0.98
fat	Q9VPF3;Q961W1	FBgn0036992	CG11796	40263	FALSE	FALSE	32.89	0.76	2.3e-09	3.5e-07	9.1e-06	1.6	1.4e-14	3e-11	1.3e-07	2.1e-05	0.069	1
fat	Q9VVI4	FBgn0023197	Jon74E	39959	TRUE	FALSE	23.93	-4.6	2.4e-08	1.7e-06	1.6e-06	0.67	0.19	0.29	4.9e-07	4.7e-05	5e-07	1
fat	Q7KUC2	FBgn0085484	Pdxk	39066	FALSE	FALSE	32.93	0.74	1.7e-08	1.3e-06	2.7e-06	1.1	2.4e-11	6.1e-09	0.0023	0.017	0.092	0.66
fat	Q9VRC9	FBgn0261675	Npc1b	33072	FALSE	FALSE	24.17	2.9	0.00066	0.0043	3.6e-12	0.8	0.27	0.39	0.048	0.14	0.12	0.95
fat	P07190	FBgn0002570	Mal-A1	35824	TRUE	FALSE	28.52	-3.7	0.0049	0.021	3.5e-14	3.5	0.007	0.022	0.00034	0.004	2e-11	1
fat	Q8IPT9;Q8IPU0;Q9VP68	FBgn0037057	CG10512	40339	FALSE	FALSE	32.41	0.79	3.4e-09	4.7e-07	1.5e-05	1.1	3.2e-11	6.9e-09	0.018	0.071	0.0007	0.24
fat	Q9VVM2	FBgn0036766	CG5506	39992	TRUE	FALSE	24.28	-1.9	0.0068	0.027	3.4e-14	0.9	0.16	0.26	0.005	0.029	2.2e-06	0.99
fat	P07191	FBgn0002569	Mal-A2	35825	TRUE	FALSE	23.94	-3.4	8.3e-06	0.00014	1.3e-08	-0.095	0.87	0.91	0.00049	0.0053	2.9e-06	1
fat	Q9VBT4	FBgn0051104	CG31104	43054	TRUE	FALSE	25.17	-4	0.00019	0.0017	1.3e-10	1.8	0.048	0.1	0.00015	0.0023	2.1e-08	1
fat	Q9VG30;Q9VG29;Q9VIM9	FBgn0038082	CG5724	41573	FALSE	FALSE	24.21	-2.5	0.00017	0.0015	1.8e-10	-0.74	0.18	0.28	0.029	0.1	8.7e-07	0.96
fat	Q8MRN5	FBgn0051233	CG31233	42557	TRUE	FALSE	24.48	-4.9	1.4e-07	6.1e-06	1.3e-06	0.29	0.63	0.72	6.9e-06	0.00025	0.00086	1
fat	Q7JR58	FBgn0033879	CG6543	36536	FALSE	TRUE	34.6	0.61	1.5e-08	1.2e-06	2.2e-05	0.75	6.2e-10	7.5e-08	0.13	0.27	0.12	0.017
fat	Q9VBT7	FBgn0039311	CG10513	43051	FALSE	FALSE	28.24	-1.8	4.5e-14	1.9e-10	0.017	-1.2	2.8e-11	6.3e-09	0.00013	0.0022	0.56	0.97
fat	Q23979-3;Q23979-2;Q23979	FBgn0010246	Myo61F	38153	TRUE	FALSE	30.36	-1.1	2.1e-08	1.6e-06	2.2e-05	-0.24	0.043	0.091	6.1e-05	0.0012	0.071	1
fat	Q9VH26	FBgn0037788	CG3940	41238	FALSE	FALSE	26.95	-1.6	1.3e-08	1.1e-06	4.3e-05	-1.5	4.2e-08	1.8e-06	0.6	0.74	0.0044	0.17
fat	Q9VIX1	FBgn0016675	Lectin-galC1	35216	FALSE	FALSE	27.72	0.71	7.6e-05	0.00078	8.1e-09	1.4	1.5e-08	7.9e-07	0.0039	0.024	9e-06	0.93
fat	P54385;Q8IMY1	FBgn0001098	Gdh	42832	FALSE	TRUE	33.85	0.68	1.2e-07	5.2e-06	1e-05	0.63	3.8e-07	1e-05	0.64	0.77	0.068	0.011
fat	Q9VGZ0	FBgn0037817	Cyp12e1	41272	FALSE	TRUE	29.56	0.76	3.8e-09	5e-07	0.00016	0.76	3.6e-09	2.8e-07	0.98	0.99	0.0067	0.0017
fat	Q8IRG3;Q9W058	FBgn0035298	SCOT	38261	FALSE	TRUE	33.11	0.89	3e-08	2e-06	6.8e-05	0.83	7.9e-08	3e-06	0.67	0.8	0.12	0.025
fat	Q9VXC7	FBgn0030775	CG9673	32649	TRUE	FALSE	24.61	-2.2	0.00023	0.0019	6.9e-09	0.28	0.58	0.68	0.0019	0.014	8.2e-05	1
fat	Q9VVU1	FBgn0036824	CG3902	40059	FALSE	TRUE	34.88	0.54	6.4e-07	1.8e-05	8.6e-06	0.7	1.5e-08	8.2e-07	0.13	0.28	0.07	0.046
fat	A1Z7F2	FBgn0033296	Mal-A7	35829	TRUE	FALSE	25.01	-3.6	2.5e-05	0.00032	2e-07	2.4	0.0012	0.0053	3e-06	0.00013	7.8e-11	1
fat	O76894	FBgn0025390	Mur2B	31111	TRUE	FALSE	25.83	2.4	0.00066	0.0043	1.8e-09	-1.1	0.073	0.14	0.00048	0.0053	0.81	1
fat	Q9VIX4	FBgn0032775	CG17544	35213	TRUE	FALSE	25.81	-4.4	2.7e-07	9.5e-06	2.9e-05	-0.26	0.63	0.73	4.7e-05	0.001	0.00035	1
fat	Q9VVP9	FBgn0036787	CG4306	40017	FALSE	FALSE	23.51	-1.6	0.035	0.094	3.3e-13	1.3	0.071	0.14	0.0083	0.041	0.041	0.99
fat	Q9V3S9	FBgn0027348	bgm	44117	FALSE	TRUE	32.69	0.75	1.5e-07	6.1e-06	5.6e-05	0.68	5.9e-07	1.5e-05	0.58	0.73	0.1	0.025
fat	Q94521-2;Q94521	FBgn0019643	AANAT1	37867	TRUE	FALSE	27.13	-1.3	1.2e-06	3.1e-05	1.6e-05	0.48	0.015	0.039	1.8e-06	0.0001	0.029	1
fat	Q9W3K9	FBgn0029994	Ldsdh1	31726	FALSE	FALSE	33.2	-0.73	3.4e-08	2.2e-06	0.00029	-0.47	1.3e-05	0.00015	0.031	0.1	0.0032	0.25
fat	Q9VTY2	FBgn0036290	CG10638	39424	FALSE	TRUE	31.56	1.1	8.8e-11	2.7e-08	0.0088	1.3	1.4e-11	4.4e-09	0.27	0.45	0.58	0.047
fat	Q9VBT2;Q8IMT6	FBgn0039316	CG11893	43056	TRUE	FALSE	26.56	-3	4.3e-09	5.3e-07	0.0015	0.43	0.14	0.23	1e-07	1.7e-05	0.8	1
fat	A1Z8G7	FBgn0033593	Listericin	36183	FALSE	FALSE	27.15	-1.3	3.1e-05	0.00038	1.3e-06	-1.3	2.2e-05	0.00022	0.91	0.95	0.53	0.18
fat	Q9VWP2	FBgn0030968	CG7322	32880	FALSE	TRUE	33.61	0.52	1.1e-07	5.1e-06	0.00022	0.51	1.8e-07	5.8e-06	0.84	0.9	0.017	0.00078
fat	Q9VBT8	FBgn0039310	CG11878	43050	FALSE	FALSE	27.39	-1.8	1.3e-07	5.5e-06	0.00024	-1.2	2.1e-05	0.00021	0.07	0.18	0.051	0.78
fat	Q7K8X7	FBgn0063491	GstE9	246581	FALSE	FALSE	33.5	0.61	4e-06	7.4e-05	1.6e-05	0.33	0.0025	0.0095	0.045	0.13	0.0025	0.34
fat	Q9VF15;Q8T0T2	FBgn0027657	glob1	41930	FALSE	FALSE	34.98	0.82	5.4e-09	6.5e-07	0.0023	1.2	8.5e-12	3.3e-09	0.0017	0.013	0.0084	0.73
fat	Q9VFC8;Q9VFC8-2	FBgn0266064	GlyS	41823	FALSE	FALSE	34.56	-0.46	1.1e-06	2.8e-05	9.8e-05	-0.24	0.0017	0.0068	0.022	0.081	0.26	0.11
fat	Q9W4P6;Q8IRT1	FBgn0028491	CG2930	31341	TRUE	FALSE	25.62	-1.7	4.6e-08	2.8e-06	0.0011	-0.22	0.26	0.37	2.8e-05	0.0007	0.055	1
fat	Q8SY61	FBgn0034470	Obp56d	37266	FALSE	FALSE	31.61	-0.93	1.9e-07	7.4e-06	0.00057	-0.59	5.9e-05	0.00047	0.049	0.14	0.95	0.49
fat	Q9VTU8	FBgn0027843	CAH2	39390	FALSE	FALSE	24.29	-1.2	0.072	0.16	6.1e-12	-0.62	0.33	0.45	0.53	0.69	9.1e-08	0.6
fat	Q9V521;Q9W1V6	FBgn0033367	PPO2	35910	FALSE	FALSE	33.81	-0.47	7.2e-06	0.00012	4.8e-05	0.14	0.075	0.14	2e-05	0.00054	0.032	0.99
fat	P35004;A1Z8J8	FBgn0010357	betaTry	47901	FALSE	FALSE	25.42	-0.68	0.19	0.33	8.9e-14	1.6	0.0049	0.016	0.0047	0.028	9e-11	0.99
fat	Q9VY24	FBgn0030575	CG5321	32399	FALSE	TRUE	31.25	0.68	7.6e-08	4.1e-06	0.0016	0.65	1.6e-07	5.4e-06	0.75	0.85	0.039	0.0064
fat	Q9VBR6	FBgn0261575	tobi	43072	TRUE	FALSE	30.01	-1.6	1.9e-06	4.2e-05	0.00019	0.68	0.0095	0.028	1.8e-06	0.0001	0.092	1
fat	Q9VU38;Q9VU39	FBgn0036337	AdenoK	39479	FALSE	FALSE	32.75	0.81	5.9e-05	0.00062	8e-06	0.67	0.00041	0.0022	0.53	0.69	0.0034	0.18
fat	Q95U34	FBgn0263199	Galk	39031	FALSE	TRUE	33.52	0.81	8.4e-09	8.2e-07	0.0061	0.97	4.8e-10	6.1e-08	0.16	0.32	0.05	0.067
fat	O18404	FBgn0021765	scu	32789	FALSE	TRUE	35.65	0.56	1e-07	4.9e-06	0.0017	0.64	1.4e-08	7.6e-07	0.38	0.56	0.12	0.0061
fat	P81641;P08144;O18408	FBgn0000078	Amy-d	36932	TRUE	FALSE	26.9	-1.1	0.0067	0.027	8.6e-09	1.9	3.7e-05	0.00033	1.1e-05	0.00036	7.8e-12	1
fat	P48610-2;P48610-3;A8JNP2;P48610-4	FBgn0000116	Argk	39041	FALSE	FALSE	35.79	-0.7	1.7e-09	2.7e-07	0.016	-0.22	0.0023	0.0087	3.7e-05	0.00087	0.74	0.94
fat	Q2PE22	FBgn0054026	CG34026	3885569	FALSE	FALSE	25.29	-0.46	0.061	0.14	3.7e-11	1.4	1.1e-05	0.00013	2.3e-05	0.0006	8.2e-10	1
fat	Q7JZZ3	FBgn0033787	CG13321	36430	TRUE	FALSE	28.31	-0.75	5.1e-05	0.00056	1.7e-05	0.34	0.027	0.063	3.7e-05	0.00087	0.003	1
fat	Q9VZI8	FBgn0016013	Faa	45577	FALSE	FALSE	30.75	0.63	1.6e-06	3.8e-05	0.00044	1.3	3.4e-11	6.9e-09	6e-05	0.0012	0.08	0.99
fat	P07764	FBgn0000064	Ald	43183	FALSE	FALSE	36.9	0.31	5.4e-05	0.00058	2.3e-05	0.7	7e-10	7.8e-08	0.00018	0.0027	0.00068	0.72
fat	Q9V7S5;Q9V7S5-2	FBgn0024315	Picot	36865	TRUE	FALSE	24.2	-3.3	1.5e-07	6.2e-06	0.0025	0.65	0.12	0.2	1.5e-06	9.4e-05	0.3	1
fat	Q9U616	FBgn0027945	ppl	40349	FALSE	FALSE	32	0.96	4.4e-08	2.7e-06	0.0051	0.74	1.5e-06	3.1e-05	0.17	0.32	0.021	0.21
fat	Q7K0L5	FBgn0034225	veil	36968	FALSE	FALSE	25.15	-2	0.0073	0.029	2.4e-08	-1.1	0.12	0.21	0.33	0.51	1.4e-05	0.73
fat	O96299	FBgn0022359	Sodh-2	41313	FALSE	FALSE	28.63	0.94	1.3e-06	3.3e-05	0.00079	0.22	0.11	0.2	0.0011	0.0099	0.0032	0.97
fat	Q9VKR7	FBgn0032286	CG7300	34472	TRUE	FALSE	27.86	-3.2	5.9e-10	1.2e-07	0.041	-1.3	8.8e-05	0.00065	0.0001	0.0018	0.033	1
fat	A8JQU3;Q9VNL0	FBgn0026077	Gasp	40745	FALSE	FALSE	27.2	1.7	9.5e-09	8.8e-07	0.016	1.3	4.9e-07	1.3e-05	0.11	0.24	0.066	0.62
fat	Q9V3Y3	FBgn0261534	l(2)34Fc	34838	FALSE	FALSE	31.59	-0.57	1.2e-05	0.00018	0.00022	-0.15	0.14	0.23	0.0055	0.031	0.039	0.72
fat	Q9VEJ3;Q8IN96	FBgn0038516	P5cr-2	42106	FALSE	FALSE	31.47	0.94	7e-08	3.9e-06	0.0071	0.57	4.8e-05	0.0004	0.024	0.086	0.017	0.58
fat	Q9VMT5	FBgn0031689	Cyp28d1	33749	FALSE	FALSE	27.42	-1.3	1.1e-07	5.1e-06	0.0064	-0.48	0.006	0.019	0.0012	0.011	0.15	0.98
fat	Q0KI39	FBgn0038829	CG17271	42463	FALSE	FALSE	26.24	-1	0.0013	0.0074	1.8e-06	-1.2	0.00027	0.0016	0.62	0.76	0.00016	0.35
fat	Q9VL70	FBgn0040064	yip2	34313	FALSE	TRUE	36	0.64	6.9e-09	7.5e-07	0.024	0.84	1e-10	1.7e-08	0.037	0.12	0.09	0.06
fat	O96553-2;O96553	FBgn0020385	pug	41279	FALSE	FALSE	34.99	0.44	3.2e-07	1.1e-05	0.0038	0.75	1e-10	1.7e-08	0.001	0.0092	0.014	0.34
fat	Q8IMT4	FBgn0051288	CG31288	318664	TRUE	FALSE	27.53	-0.86	6.9e-05	0.00071	6.8e-05	0.44	0.017	0.043	3.3e-05	0.0008	0.0038	1
fat	Q9VDP9;Q7KSB5	FBgn0038771	CG4390	42396	FALSE	FALSE	30.59	0.65	2.1e-05	0.00029	0.00023	0.32	0.01	0.03	0.058	0.16	0.1	0.46
fat	Q9V9A9;E1JGY6;Q0E9N2	FBgn0010482	l(2)01289	46017	FALSE	TRUE	32.57	-0.45	2.2e-05	0.0003	0.00025	-0.42	5.6e-05	0.00046	0.76	0.86	0.28	0.0071
fat	Q9VGK3	FBgn0037930	CG14715	41403	FALSE	FALSE	28.49	-0.55	6.9e-05	0.00071	9.7e-05	-0.3	0.012	0.034	0.11	0.24	0.61	0.28
fat	Q9VGE7	FBgn0260746	Ect3	41457	FALSE	FALSE	28.49	-0.52	4.7e-05	0.00053	0.00014	-0.24	0.026	0.061	0.054	0.15	0.0096	0.35
fat	P25160	FBgn0000115	Arl1	39745	TRUE	FALSE	25.69	-3.3	1.6e-07	6.6e-06	0.0083	0.049	0.9	0.93	1.3e-05	0.00039	0.42	1
fat	Q7JVZ8	FBgn0034354	GstE11	37128	TRUE	FALSE	28.46	1.3	2.7e-08	1.9e-06	0.021	0.31	0.04	0.086	8e-05	0.0015	0.67	1
fat	Q9VV87	FBgn0260960	Baldspot	39860	TRUE	FALSE	27.18	-1.4	2.1e-07	7.9e-06	0.0081	-0.061	0.73	0.81	3.2e-05	0.00079	0.82	1
fat	Q9VHE4	FBgn0037687	CG8132	41121	FALSE	FALSE	30.85	0.43	3.5e-06	6.8e-05	0.0015	0.76	1.2e-09	1.2e-07	0.0027	0.019	0.033	0.42
fat	Q9VDC2	FBgn0038876	CG5919	42526	FALSE	FALSE	28.14	0.64	0.0065	0.026	3.1e-07	0.14	0.52	0.63	0.1	0.23	0.11	0.71
fat	Q27580	FBgn0014455	Ahcy	32471	FALSE	FALSE	33.42	0.48	0.00089	0.0055	7.3e-06	0.84	2e-06	3.8e-05	0.052	0.15	0.18	0.53
fat	Q9VT60;Q7KUD4	FBgn0036053	iPLA2-VIA	39160	FALSE	FALSE	29.37	0.63	6.5e-07	1.8e-05	0.0046	1	6.7e-10	7.8e-08	0.0057	0.031	0.89	0.61
fat	Q9W3C4	FBgn0041629	Hexo2	31808	FALSE	TRUE	30.49	-0.58	1.1e-05	0.00017	0.00072	-0.46	0.00016	0.001	0.37	0.55	0.053	0.062
fat	Q9VLL5	FBgn0014417	CG13397	46386	FALSE	TRUE	29.95	-0.8	1.2e-07	5.3e-06	0.012	-0.65	2.4e-06	4.2e-05	0.25	0.43	0.0024	0.094
fat	Q9VCM8	FBgn0039073	CG4408	42762	TRUE	FALSE	26.43	-1	1.9e-05	0.00026	0.0005	0.14	0.43	0.55	0.0002	0.0029	0.15	1
fat	Q94915	FBgn0016715	Reg-2	38075	FALSE	FALSE	32.22	0.53	2.3e-05	0.00031	0.00042	0.88	3e-08	1.4e-06	0.019	0.073	0.013	0.51
fat	Q9VLR2	FBgn0032002	CG8353	34123	FALSE	FALSE	29.52	1.1	1.1e-06	2.8e-05	0.0039	0.86	1.6e-05	0.00017	0.34	0.52	0.015	0.26
fat	P42281	FBgn0010387	Dbi	38784	FALSE	TRUE	35.05	0.35	0.003	0.015	1.7e-06	0.3	0.0091	0.027	0.72	0.84	0.014	0.03
fat	Q8MLS1	FBgn0085453	CG34424	37699	FALSE	FALSE	31.76	0.36	5e-05	0.00055	0.00024	1.1	5.8e-12	2.8e-09	5.7e-07	5.1e-05	0.0045	1
fat	Q9VZ33;Q9VZ32	FBgn0259101	CG42249	32043	FALSE	FALSE	24.56	-1.6	0.01	0.036	2.2e-07	-0.18	0.75	0.82	0.088	0.21	0.00031	0.91
fat	Q8SXD1	FBgn0050008	CG30008	246388	TRUE	FALSE	28.07	-1.5	2.9e-07	1e-05	0.0099	0.16	0.38	0.5	7.1e-06	0.00025	0.12	1
fat	Q9VKX2	FBgn0262782	Mdh1	34414	FALSE	TRUE	35.13	0.56	2.8e-06	5.6e-05	0.0028	0.74	5.8e-08	2.3e-06	0.14	0.29	0.04	0.095
fat	Q9W0X1	FBgn0035090	CG2736	37998	FALSE	FALSE	30.11	-1.4	2.2e-11	1.4e-08	0.23	-0.75	2.9e-07	8.3e-06	0.00015	0.0023	0.13	0.98
fat	Q9VI66	FBgn0051248	CG31248	40853	TRUE	FALSE	28.6	-0.99	1.5e-09	2.5e-07	0.085	-0.26	0.0071	0.022	1.5e-05	0.00044	0.35	1
fat	Q7KN85	FBgn0020236	ATPCL	36760	FALSE	FALSE	35.85	0.48	8.9e-08	4.5e-06	0.019	0.73	1.3e-10	2e-08	0.0046	0.027	0.31	0.13
fat	Q9V8M5;Q9V8M5-2	FBgn0034390	CG15093	37166	TRUE	FALSE	32.38	0.74	2.2e-07	8.3e-06	0.012	0.047	0.61	0.71	4.3e-05	0.00096	0.76	0.99
fat	A1ZAJ8	FBgn0034160	CG5550	36883	FALSE	FALSE	25.83	-1.4	0.059	0.14	5.4e-09	1	0.15	0.25	0.023	0.084	6.2e-07	0.98
fat	Q9VU94	FBgn0029167	Hml	39529	TRUE	FALSE	28.51	-0.72	6.9e-05	0.00071	0.00026	0.27	0.065	0.13	9e-05	0.0016	0.0075	1
fat	Q9VC18	FBgn0039241	CG11089	42973	FALSE	FALSE	34.91	0.74	3.6e-07	1.1e-05	0.011	1.1	1e-09	1e-07	0.015	0.062	0.00041	0.56
fat	Q9V931	FBgn0034509	Obp57c	37311	FALSE	FALSE	25.99	-1	2.8e-06	5.6e-05	0.0044	-0.68	0.00024	0.0014	0.14	0.29	0.018	0.47
fat	Q9VTV9	FBgn0036271	Pbgs	39402	FALSE	FALSE	29.53	0.34	0.00062	0.0042	4.9e-05	-0.2	0.027	0.062	0.00021	0.003	0.049	0.95
fat	Q9XY35	FBgn0011227	ox	45401	FALSE	FALSE	31.75	0.91	1.7e-05	0.00024	0.0015	0.43	0.014	0.038	0.041	0.13	0.027	0.74
fat	Q9VIS3;Q7KT33	FBgn0032820	fbp	35265	FALSE	FALSE	35.41	0.52	1.6e-06	3.8e-05	0.007	0.76	6.9e-09	4.5e-07	0.033	0.11	0.021	0.17
fat	Q9VA41	FBgn0039801	Npc2h	43649	TRUE	FALSE	24.56	-0.72	0.00011	0.0011	0.00031	0.56	0.0012	0.0053	8.1e-06	0.00028	0.0054	1
fat	Q94522;Q9VDW7	FBgn0004888	Scsalpha	38447	FALSE	TRUE	34.65	0.4	0.00034	0.0026	0.00011	0.46	8.5e-05	0.00063	0.66	0.78	0.0022	0.021
fat	Q9TVP3-2;Q9TVP3;Q9TVP3-3	FBgn0027654	jdp	43630	FALSE	TRUE	28.44	1	3.7e-06	7.1e-05	0.0044	1	5.1e-06	7.2e-05	0.91	0.95	0.0038	0.088
fat	Q86BQ3;Q8IGQ3	FBgn0032614	CG13284	35021	FALSE	TRUE	31.39	-0.75	9.6e-12	8.3e-09	0.35	-0.74	1.2e-11	4.1e-09	0.87	0.92	0.24	7.1e-05
fat	Q9VH72	FBgn0037749	CG9471	41197	FALSE	TRUE	30.95	0.43	2.3e-05	0.00031	0.0014	0.35	0.00022	0.0013	0.46	0.63	0.038	0.013
fat	P17336;Q9VLI6	FBgn0000261	Cat	40048	FALSE	TRUE	36.35	0.23	0.00014	0.0013	0.00031	0.34	1.5e-06	3e-05	0.13	0.27	0.1	0.0015
fat	Q9GYU8	FBgn0026207	mbo	41562	FALSE	FALSE	27.21	-0.45	0.00022	0.0018	0.0002	-0.23	0.031	0.071	0.12	0.26	0.74	0.19
fat	Q7KV94;Q7KV91;Q7KV95;Q9W004	FBgn0035348	CG16758	38315	FALSE	FALSE	32.17	0.55	2.4e-06	5.1e-05	0.007	1.8	2.2e-14	3.2e-11	2.6e-09	1.5e-06	0.0028	1
fat	Q9VLJ7	FBgn0032055	CG13091	34188	FALSE	FALSE	31.57	-1.4	8.4e-11	2.7e-08	0.27	-0.76	6.1e-07	1.5e-05	0.00044	0.005	0.26	0.96
fat	Q9I7Q5	FBgn0042119	Cpr65Au	59158	FALSE	FALSE	30.83	-0.92	0.001	0.0062	4.4e-05	-0.19	0.44	0.55	0.04	0.12	0.15	0.88
fat	Q8SY19;Q8SY70	FBgn0025814	Mgstl	44110	FALSE	FALSE	31.35	0.67	4.6e-05	0.00052	0.001	0.45	0.002	0.0077	0.24	0.41	0.036	0.24
fat	Q27593	FBgn0013772	Cyp6a8	36666	TRUE	FALSE	28.02	-1	2.3e-07	8.6e-06	0.026	0.33	0.019	0.048	6.2e-07	5.1e-05	0.062	1
fat	Q9VIM0	FBgn0032864	CG2493	35316	FALSE	FALSE	30.14	-0.69	1.8e-05	0.00025	0.0023	-0.21	0.094	0.17	0.01	0.047	0.008	0.79
fat	Q86NK9;Q8IR38;Q8IR37;Q9XYX1	FBgn0026428	HDAC6	32461	FALSE	FALSE	31.29	0.56	4.3e-06	7.9e-05	0.0066	0.87	8.9e-09	5.5e-07	0.02	0.076	0.062	0.4
fat	Q9VKI8	FBgn0032350	CG6287	34554	FALSE	TRUE	35.26	0.45	2.3e-05	0.00031	0.0022	0.6	6.5e-07	1.6e-05	0.21	0.38	0.058	0.053
fat	Q9I7S8;A8QI10;Q9VK80	FBgn0020513	Paics	32228	FALSE	TRUE	35.25	0.61	6.9e-09	7.5e-07	0.11	0.62	5e-09	3.5e-07	0.88	0.93	0.0094	0.00052
fat	Q9I7N0;Q7KTC7;Q7KTD0;Q7KTC9;Q7KTC8;Q7KTC6;Q7KTC5;Q7KTC4;Q7KTC3;Q7KTC2;Q7KTC1;Q7KTB9;Q7KTB8;Q7KTB7;Q9VK56;Q7KTC0;Q9W2I5	FBgn0032456	MRP	34686	FALSE	TRUE	31.19	-0.21	0.00028	0.0022	0.0003	-0.047	0.33	0.45	0.023	0.084	0.017	0.0084
fat	Q26454	FBgn0015929	dpa	35679	TRUE	FALSE	26.86	3.6	2.7e-11	1.4e-08	0.39	-0.83	0.0034	0.012	2.5e-10	2.7e-07	0.12	1
fat	Q9VFX0	FBgn0038135	CG8773	41634	FALSE	FALSE	23.09	-2.1	0.0064	0.026	8e-06	-1.5	0.041	0.089	0.54	0.7	0.00012	0.61
fat	P20353	FBgn0001104	Galphai	38765	TRUE	FALSE	27.04	0.88	1.8e-06	4.1e-05	0.016	0.025	0.85	0.89	0.00015	0.0024	0.41	1
fat	Q9W4M4	FBgn0029697	CG15570	31366	TRUE	FALSE	28.56	2.6	0.0002	0.0017	0.00062	-0.14	0.8	0.86	0.0027	0.019	0.49	1
fat	Q7KK90	FBgn0034335	GstE1	37106	FALSE	TRUE	32.01	0.39	0.00017	0.0015	0.00076	0.43	5.8e-05	0.00046	0.73	0.84	0.031	0.0097
fat	O44226	FBgn0023212	EloB	42435	FALSE	FALSE	30.85	0.24	0.01	0.037	4.9e-06	1.2	8.2e-11	1.4e-08	5.4e-07	5e-05	0.00019	1
fat	Q9VTI0	FBgn0036157	CG7560	39276	FALSE	FALSE	24.94	-2	0.026	0.074	8.9e-07	-2	0.026	0.062	0.99	0.99	0.03	0.39
fat	Q9VFV1	FBgn0041711	yellow-e	41653	FALSE	FALSE	28.15	-0.87	5.6e-06	9.9e-05	0.0099	-0.49	0.002	0.0077	0.067	0.17	0.045	0.57
fat	Q8SXY6	FBgn0045866	bai	42996	FALSE	TRUE	29.41	-0.95	6.6e-08	3.7e-06	0.075	-0.87	2.4e-07	7.3e-06	0.59	0.74	0.33	0.053
fat	Q9VTU9	FBgn0036262	CG6910	39391	FALSE	FALSE	28.64	0.47	0.011	0.038	5.7e-06	0.79	0.00015	0.001	0.19	0.35	0.0012	0.47
fat	Q9VB76	FBgn0039486	caix	43264	FALSE	FALSE	29.85	-0.74	8.6e-06	0.00014	0.0086	-0.4	0.0036	0.013	0.061	0.16	0.056	0.5
fat	Q09024-3;Q09024-2;Q09024	FBgn0001257	ImpL2	38513	TRUE	FALSE	27.99	-1.4	6e-11	2.1e-08	0.41	-0.27	0.015	0.039	3.1e-07	3.6e-05	0.0038	1
fat	A1Z877;A1Z876	FBgn0026403	Ndg	36089	FALSE	TRUE	32.49	-0.41	1e-06	2.7e-05	0.029	-0.45	3.4e-07	9.5e-06	0.67	0.8	0.38	0.00063
fat	Q9VLU6	FBgn0031971	Sirup	34089	FALSE	FALSE	27.49	0.64	0.00033	0.0025	0.00073	0.89	9.1e-06	0.00011	0.24	0.42	0.0056	0.33
fat	Q8MPN6;Q8MM39;Q8MPN8;Q8MM49	FBgn0265137	Spn42Da	49805	TRUE	FALSE	24.99	2.6	3e-09	4.3e-07	0.22	0.75	0.0058	0.019	3.6e-05	0.00085	0.22	1
fat	A9UN61	FBgn0032127	CG13114	34272	TRUE	FALSE	25.62	2.3	0.00026	0.0021	0.00093	-4.4	9.2e-08	3.4e-06	3.1e-08	8.2e-06	0.74	1
fat	Q9VET3	FBgn0038446	CG14903	42014	FALSE	FALSE	26.5	-0.89	1.1e-05	0.00018	0.01	-0.53	0.002	0.0077	0.1	0.23	0.24	0.53
fat	Q9VG98	FBgn0010038	GstD2	48335	FALSE	FALSE	23.32	-2	0.0067	0.027	2.3e-05	-1.1	0.13	0.22	0.31	0.49	0.07	0.75
fat	Q95U30	FBgn0261393	alpha-Est5	40905	FALSE	FALSE	30.21	-0.49	4.8e-06	8.7e-05	0.017	-0.063	0.41	0.53	0.00089	0.0083	0.66	0.79
fat	Q9VIC9	FBgn0032945	CG8665	35407	FALSE	FALSE	34.05	0.59	3.2e-07	1.1e-05	0.06	1.3	1.3e-12	9.2e-10	2.3e-06	0.00012	0.25	1
fat	Q9VHD3	FBgn0037696	GstZ1	41132	FALSE	FALSE	28.45	0.65	2.6e-06	5.4e-05	0.024	0.043	0.66	0.75	0.00029	0.0038	0.22	0.97
fat	Q9V674	FBgn0025454	Cyp6g1	36316	FALSE	FALSE	32.66	0.27	0.0023	0.012	0.00011	0.84	2.4e-09	2.1e-07	5.3e-05	0.0011	0.21	0.98
fat	Q4V6M1	FBgn0051713	Apf	318908	FALSE	FALSE	28.32	0.58	4.6e-05	0.00052	0.0048	0.32	0.009	0.027	0.1	0.23	0.095	0.3
fat	Q9VP02	FBgn0043783	CG32444	40406	FALSE	FALSE	31.6	-0.57	1.2e-07	5.2e-06	0.093	-0.12	0.085	0.16	0.00018	0.0026	0.0076	0.86
fat	Q9V4I1;Q9V4I0	FBgn0015039	Cyp9b2	35635	FALSE	FALSE	29.65	-1.1	9.8e-09	8.8e-07	0.19	-0.38	0.0028	0.01	0.0002	0.0028	0.48	0.99
fat	P28750;E1JGN9	FBgn0000615	exu	37345	TRUE	FALSE	26.77	2.7	1.8e-08	1.3e-06	0.17	-2.6	2.7e-08	1.3e-06	9.9e-11	1.4e-07	0.11	1
fat	Q9VLX9	FBgn0031942	CG7203	34055	FALSE	FALSE	34.07	0.97	4.9e-06	8.9e-05	0.02	0.81	4.5e-05	0.00039	0.45	0.62	0.075	0.21
fat	Q8MLN4;Q0E8V8	FBgn0035094	CG9380	38011	FALSE	FALSE	25.47	-1	0.031	0.084	2.3e-06	-0.62	0.17	0.27	0.52	0.68	0.017	0.54
fat	Q7KTI0	FBgn0026718	fu12	34176	FALSE	FALSE	27.43	1.1	1.9e-09	2.9e-07	0.29	0.74	1.1e-06	2.4e-05	0.011	0.051	0.43	0.68
fat	Q9VMF0	FBgn0031801	CG9498	33885	FALSE	FALSE	27.6	-1.5	2.5e-07	9.1e-06	0.077	-0.64	0.0028	0.01	0.0046	0.027	0.16	0.97
fat	P33438	FBgn0001114	Glt	34193	FALSE	FALSE	33.84	-0.49	2.1e-05	0.00029	0.0097	-0.68	3.8e-07	1e-05	0.15	0.31	1.5e-05	0.1
fat	Q8IGP1;Q7KUD8;Q867T3;Q86BH9;Q8IGH4	FBgn0264489	CG43897	39153	FALSE	FALSE	30.27	-2.1	2.3e-12	5e-09	0.69	-1.9	1.8e-11	5.2e-09	0.17	0.33	0.77	0.31
fat	Q5U1B0	FBgn0033949	CG10131	36624	FALSE	FALSE	24.99	-0.58	0.00064	0.0043	0.00068	0.038	0.79	0.85	0.0061	0.033	0.12	0.91
fat	Q9V677	FBgn0033698	CG8858	36319	FALSE	TRUE	30.17	-0.48	3.5e-06	6.9e-05	0.028	-0.46	6.3e-06	8.6e-05	0.84	0.9	0.49	0.0032
fat	O46067	FBgn0023529	CG2918	31215	FALSE	TRUE	32.22	-0.21	0.0054	0.023	5.7e-05	-0.19	0.011	0.032	0.81	0.89	0.051	0.0019
fat	Q9W3L4	FBgn0029990	CG2233	31721	TRUE	FALSE	33.72	-1	3.1e-07	1.1e-05	0.084	0.16	0.23	0.34	4.5e-06	0.00018	0.015	1
fat	P21521-3;P21521-2;P21521	FBgn0004242	Syt1	33473	FALSE	FALSE	23.64	-0.95	0.048	0.12	1.3e-06	-0.06	0.89	0.93	0.18	0.34	0.00059	0.8
fat	Q9VT32;Q9VT33	FBgn0036030	CG6767	39132	FALSE	FALSE	33.63	0.87	2e-07	7.7e-06	0.1	1.2	1.5e-09	1.4e-07	0.037	0.12	0.019	0.49
fat	Q6NN18	FBgn0034382	CG18609	37158	FALSE	FALSE	24.1	1.9	0.00033	0.0026	0.0017	2.1	0.00013	0.00088	0.76	0.86	0.00019	0.4
fat	A1ZBR1;Q9VL46	FBgn0034480	CG16898	37276	TRUE	FALSE	30.77	-1	5.3e-08	3.2e-06	0.15	1.2	5.9e-09	4.1e-07	7.6e-11	1.4e-07	0.95	1
fat	Q9VTD4	FBgn0029172	Fad2	44006	FALSE	FALSE	31.84	-1.1	7.7e-08	4.1e-06	0.14	-0.74	1.2e-05	0.00014	0.069	0.17	0.35	0.49
fat	Q9VRD4	FBgn0031143	CG1532	33076	TRUE	FALSE	30.77	-0.52	8.2e-07	2.3e-05	0.066	0.14	0.066	0.13	3.6e-06	0.00015	0.43	1
fat	P82712;Q7KR10	FBgn0050489	Cyp12d1-p	246648	TRUE	FALSE	28.64	-0.53	0.00013	0.0012	0.0047	0.79	9.6e-07	2.2e-05	9.8e-08	1.7e-05	0.73	1
fat	Q7K511	FBgn0023507	D2hgdh	31184	FALSE	FALSE	34.29	0.45	1.7e-06	3.9e-05	0.054	0.2	0.0054	0.018	0.014	0.06	0.14	0.15
fat	P36951	FBgn0011770	Gip	31960	FALSE	FALSE	33.32	0.43	2.3e-06	5e-05	0.049	0.8	2.1e-10	2.9e-08	0.00048	0.0053	0.22	0.65
fat	Q5U124;Q8T0N3	FBgn0050359	Mal-A5	35828	TRUE	FALSE	29.43	-0.8	9.7e-09	8.8e-07	0.27	0.0086	0.91	0.94	1.2e-06	7.8e-05	0.84	1
fat	Q7JXB5;A8DYI3	FBgn0034356	CG10924	37130	FALSE	FALSE	25.78	1.5	0.00029	0.0023	0.0026	2.1	5.4e-06	7.5e-05	0.19	0.36	0.026	0.73
fat	A1Z729	FBgn0033205	CG2064	35708	FALSE	TRUE	29	-0.85	9.1e-08	4.6e-06	0.16	-0.75	4.7e-07	1.2e-05	0.51	0.67	0.91	0.045
fat	A1Z7Z4	FBgn0033446	CG1648	36009	FALSE	FALSE	35.39	0.65	0.00094	0.0057	0.00093	0.89	3.8e-05	0.00034	0.31	0.49	0.069	0.34
fat	Q7JV39	FBgn0034198	CG11400	36935	TRUE	FALSE	26.96	-0.57	0.0012	0.0068	0.00076	1.1	5.9e-07	1.5e-05	2.4e-07	3e-05	0.0026	1
fat	Q9VBQ4	FBgn0039342	CG5107	43084	FALSE	FALSE	23.45	-0.53	0.42	0.57	9.7e-10	-0.35	0.59	0.69	0.84	0.91	3e-07	0.43
fat	Q9VGW6	FBgn0017577	Mcm5	41296	TRUE	FALSE	26.16	3.5	1.1e-08	9.3e-07	0.27	0.45	0.21	0.32	8.7e-06	0.00029	0.11	1
fat	Q9VFG5	FBgn0038257	smp-30	41786	FALSE	FALSE	33.92	0.58	1.3e-06	3.2e-05	0.067	1	3.8e-10	5e-08	0.0016	0.013	0.11	0.76
fat	Q9W1H8	FBgn0025352	Thiolase	37784	FALSE	TRUE	35.31	0.45	3.6e-06	6.9e-05	0.044	0.33	0.00014	0.00094	0.22	0.39	0.15	0.018
fat	B7Z0X1;Q9W457	FBgn0029823	Shmt	31524	FALSE	FALSE	35.92	0.57	5.7e-08	3.3e-06	0.19	0.91	4.7e-11	8.4e-09	0.0018	0.014	0.13	0.47
fat	D1YSG0	FBgn0005666	bt	43814	FALSE	TRUE	35.9	-0.54	3.3e-07	1.1e-05	0.11	-0.6	6.5e-08	2.5e-06	0.51	0.67	0.2	0.0052
fat	Q9W452	FBgn0029828	CG6067	31529	FALSE	FALSE	30.72	0.65	0.00064	0.0043	0.0015	0.51	0.0047	0.016	0.53	0.69	0.041	0.19
fat	Q9W127	FBgn0035044	CG3663	37944	FALSE	FALSE	30.87	0.39	0.0012	0.0069	0.00082	0.69	2.4e-06	4.2e-05	0.05	0.14	0.029	0.39
fat	Q9VKM1	FBgn0004872	piwi	34521	TRUE	FALSE	26.67	4.1	3.5e-11	1.5e-08	0.63	0.18	0.52	0.63	1.7e-08	5.6e-06	0.28	1
fat	Q7JRA7;Q5BIE4	FBgn0034394	CG15096	37170	FALSE	TRUE	29.86	-0.59	1.4e-05	0.00021	0.024	-0.6	1.1e-05	0.00013	0.93	0.96	0.0064	0.016
fat	Q8IPQ2;Q9V3N7;Q9VND9;Q8IPQ3	FBgn0023023	CRMP	40675	FALSE	FALSE	31.28	0.33	8.2e-05	0.00082	0.0083	0.58	5.7e-08	2.3e-06	0.014	0.058	0.024	0.16
fat	Q9V3W0	FBgn0086691	UK114	34897	FALSE	FALSE	34.22	0.39	0.0057	0.024	0.00014	0.2	0.12	0.21	0.29	0.47	0.0043	0.2
fat	Q9VTV3;Q8IQG9	FBgn0022709	Adk1	39396	TRUE	FALSE	30.76	-0.4	1.7e-05	0.00024	0.022	0.21	0.0055	0.018	5.9e-06	0.00023	0.033	0.99
fat	Q9VB79	FBgn0039483	CG14259	43261	FALSE	FALSE	27.73	-0.33	0.046	0.11	3.8e-06	-0.58	0.0015	0.0063	0.27	0.45	0.0075	0.34
fat	P91622;A8DY78	FBgn0017558	Pdk	35970	FALSE	FALSE	31.25	0.81	8.4e-07	2.3e-05	0.086	0.58	5.3e-05	0.00044	0.15	0.31	0.02	0.24
fat	Q9V9L1	FBgn0033065	Cyp6w1	35543	TRUE	FALSE	30.97	-0.89	8.5e-07	2.3e-05	0.087	-0.02	0.87	0.91	7.9e-05	0.0014	0.15	1
fat	Q86B46;Q9VX51	FBgn0030839	CG5613	32726	FALSE	FALSE	25.85	0.6	0.0052	0.022	0.00017	0.58	0.0065	0.02	0.94	0.97	0.61	0.12
fat	P17205;Q9VRS8;Q9VA67;Q9VA66;Q7JX43	FBgn0003356	Jon99Cii	43543	FALSE	FALSE	23.98	-1	0.11	0.22	4.1e-07	-0.4	0.52	0.63	0.48	0.65	2.8e-06	0.63
fat	Q9I7J0	FBgn0038774	CG5023	42400	FALSE	FALSE	33.33	-0.65	3.9e-08	2.5e-06	0.22	-0.19	0.016	0.041	0.00023	0.0032	0.47	0.88
fat	Q9VMD7;B7Z028	FBgn0031813	CG9527	33898	FALSE	FALSE	29.51	-1.4	3e-10	7.6e-08	0.52	-0.72	3.3e-06	5.3e-05	0.00055	0.0059	0.37	0.97
fat	Q7JQR3	FBgn0033814	CG4670	36464	TRUE	FALSE	27.91	-0.62	5.7e-07	1.7e-05	0.11	0.17	0.046	0.098	2.1e-06	0.00011	0.16	1
fat	Q7JW73	FBgn0033373	CG8080	35918	FALSE	FALSE	31.19	0.51	2e-05	0.00028	0.022	0.82	3.8e-08	1.7e-06	0.026	0.091	0.058	0.4
fat	Q8IPS4;Q9VNQ1	FBgn0037200	CG11109	40507	FALSE	FALSE	25	-2.4	2.4e-05	0.00031	0.021	-1.8	0.00046	0.0024	0.34	0.52	0.1	0.66
fat	Q9V4C0	FBgn0039896	yellow-h	43779	FALSE	FALSE	25.39	0.78	0.003	0.014	0.0004	0.95	0.00059	0.003	0.61	0.75	0.061	0.3
fat	Q9VPQ7	FBgn0031260	Spp	33227	TRUE	FALSE	29.43	-0.56	5.8e-06	0.0001	0.043	0.22	0.024	0.057	7.4e-06	0.00026	0.39	1
fat	Q9W552	FBgn0014411	Vps26	31144	FALSE	FALSE	28.34	-0.45	0.00012	0.0012	0.0076	0.077	0.41	0.52	0.00076	0.0075	0.023	0.91
fat	Q8IQW5	FBgn0031037	CG14207	32955	FALSE	FALSE	26.85	-0.62	0.00012	0.0011	0.0079	-0.075	0.56	0.66	0.0069	0.036	0.071	0.87
fat	Q9VWT7	FBgn0030929	CG15043	32835	FALSE	FALSE	28.34	-0.24	0.17	0.3	1.4e-07	0.43	0.022	0.055	0.012	0.054	2.4e-05	0.91
fat	Q8I0S6;Q9VPG5;Q9VPG4;Q9NHN2	FBgn0011205	fbl	46234	FALSE	FALSE	28.12	-0.71	6.2e-06	0.00011	0.044	-0.096	0.4	0.52	0.0011	0.0099	0.027	0.95
fat	Q9V6K1-2;Q9V6K1	FBgn0020370	TppII	36444	FALSE	TRUE	33.38	-0.35	6.3e-06	0.00011	0.044	-0.23	0.00064	0.0032	0.14	0.28	0.03	0.0053
fat	Q9VSK9	FBgn0035901	CG6745	38969	FALSE	FALSE	25.56	0.96	2.4e-05	0.00031	0.022	-0.00095	1	1	0.00083	0.0079	0.089	0.99
fat	Q8IMK5;Q9VAI0	FBgn0039690	Gnpnat	43504	FALSE	TRUE	30.45	-0.49	2.9e-05	0.00037	0.02	-0.61	2e-06	3.8e-05	0.36	0.53	0.0054	0.044
fat	Q9VKS2	FBgn0032281	CG17107	34467	FALSE	FALSE	26.31	-1.7	5.2e-05	0.00057	0.014	-2.3	9.3e-07	2.1e-05	0.17	0.32	0.36	0.75
fat	Q9W223	FBgn0034756	Cyp6d2	37594	FALSE	FALSE	27.62	-0.93	3e-07	1e-05	0.14	-0.46	0.00088	0.0041	0.012	0.052	0.48	0.77
fat	Q8IPA2;Q8IPA2	FBgn0032382	Mal-B2	34598	FALSE	FALSE	32.83	0.58	1.1e-05	0.00018	0.034	1.9	2.2e-13	1.9e-10	2.2e-08	6.4e-06	0.18	1
fat	Q9VBV4	FBgn0039297	CG11852	43035	TRUE	FALSE	29.87	-0.49	0.0002	0.0017	0.006	0.33	0.0057	0.018	3.2e-05	0.00079	0.12	1
fat	Q9VAQ4	FBgn0039628	CG11841	43430	FALSE	FALSE	27.82	-0.66	0.00087	0.0054	0.0018	-0.42	0.02	0.051	0.32	0.5	0.087	0.34
fat	Q9VV09	FBgn0036587	CG4950	39783	FALSE	FALSE	27.23	-0.7	0.0018	0.0098	0.00085	-0.46	0.028	0.065	0.38	0.56	0.014	0.36
fat	Q9VAJ9	FBgn0039674	CG1907	43483	FALSE	TRUE	33.51	-0.3	3.4e-05	0.00041	0.02	-0.29	5.9e-05	0.00047	0.85	0.91	0.047	0.0003
fat	Q9Y112	FBgn0027552	CG10863	38463	FALSE	FALSE	34.09	0.18	0.0031	0.015	0.00051	0.57	3.6e-09	2.8e-07	6.7e-05	0.0013	0.0042	0.72
fat	Q7KTA1	FBgn0028543	NimB2	260645	TRUE	FALSE	27.1	-1.7	1.3e-08	1.1e-06	0.32	-0.6	0.003	0.011	0.00026	0.0034	0.14	1
fat	Q9VN71	FBgn0037288	CG14661	40611	FALSE	FALSE	32.37	-0.9	1e-07	4.9e-06	0.21	-0.61	1.9e-05	0.00019	0.062	0.17	0.027	0.38
fat	Q9VQB3	FBgn0031417	CG3597	33420	FALSE	TRUE	32.05	-0.31	0.00052	0.0036	0.0031	-0.16	0.044	0.094	0.16	0.31	0.0017	0.044
fat	Q86P18;Q9VBF7	FBgn0053970	CG33970	43186	FALSE	FALSE	23.91	-0.78	0.11	0.21	9.6e-07	-0.11	0.82	0.87	0.31	0.49	0.024	0.69
fat	Q9VG82;Q9VG82-2	FBgn0038037	Cyp9f2	41520	FALSE	FALSE	30.98	-0.75	9.3e-10	1.7e-07	0.5	-0.22	0.0033	0.012	1.5e-05	0.00044	0.26	0.98
fat	Q9VEA1	FBgn0026250	eIF1A	44260	FALSE	FALSE	29.49	0.74	0.00011	0.001	0.011	0.5	0.0035	0.012	0.28	0.45	0.023	0.31
fat	Q7K568	FBgn0033448	hebe	36011	FALSE	FALSE	27.36	0.77	1.3e-05	0.0002	0.037	0.89	1.9e-06	3.6e-05	0.5	0.66	0.32	0.13
fat	Q8MSJ6	FBgn0051207	CG31207	326125	FALSE	FALSE	25.54	-3.4	3.7e-05	0.00044	0.021	-2.1	0.0034	0.012	0.16	0.31	0.087	0.85
fat	Q9VX77	FBgn0260747	Chchd2	32701	FALSE	FALSE	29.45	0.61	0.0023	0.012	0.00078	0.43	0.021	0.052	0.48	0.65	0.0026	0.25
fat	Q8SZ72	FBgn0033763	CG8646	36394	FALSE	FALSE	26.94	-1.5	9.5e-06	0.00016	0.044	-0.99	0.00067	0.0033	0.17	0.33	0.31	0.66
fat	Q9VQ61;Q8T0M9;Q8IPY3	FBgn0001125	Got2	33373	FALSE	FALSE	34.98	0.38	0.0007	0.0045	0.0027	0.071	0.45	0.57	0.03	0.1	0.29	0.41
fat	P48375	FBgn0013954	FK506-bp2	37214	FALSE	TRUE	33.86	0.33	0.00019	0.0016	0.008	0.33	0.00017	0.0011	0.97	0.98	0.25	0.0015
fat	Q9VWL4	FBgn0030990	CG7556	32902	FALSE	FALSE	26.39	-1	1.7e-06	3.8e-05	0.096	-0.45	0.0056	0.018	0.014	0.058	0.26	0.85
fat	Q9VVK2	FBgn0036750	CG6034	39974	FALSE	FALSE	25.69	-2.8	4.8e-05	0.00054	0.021	-1.9	0.0018	0.0073	0.25	0.43	0.031	0.76
fat	P09052	FBgn0262526	solo	34884	TRUE	FALSE	27.05	4.3	9.4e-08	4.7e-06	0.23	-1	0.051	0.11	5.9e-07	5.1e-05	0.077	1
fat	E1JH83;A1ZAI5	FBgn0034145	CG5065	36860	FALSE	FALSE	23.62	-2.7	3.2e-05	0.0004	0.026	-0.66	0.19	0.29	0.0089	0.043	0.72	0.99
fat	Q9VHA1;Q9VHA2	FBgn0037723	SpdS	41167	FALSE	FALSE	32.26	-0.47	3.5e-05	0.00042	0.025	0.12	0.2	0.3	0.00014	0.0023	0.74	0.97
fat	Q9VRL0	FBgn0035600	Cyt-c1	38612	FALSE	FALSE	32.71	-0.52	0.0016	0.009	0.0014	0.26	0.074	0.14	0.00093	0.0085	0.036	0.98
fat	Q9VP69;Q8IPU1	FBgn0053054	CG33054	40340	FALSE	FALSE	30.34	0.41	0.003	0.014	0.00075	1.1	4.1e-08	1.8e-06	0.00079	0.0077	0.002	0.97
fat	Q9V558;Q9V559;Q9V557	FBgn0015037	Cyp4p1	45524	FALSE	FALSE	30.67	0.37	0.00013	0.0012	0.012	0.58	4.2e-07	1.1e-05	0.055	0.15	0.0092	0.13
fat	P19967	FBgn0000406	Cyt-b5-r	35008	FALSE	TRUE	33.51	0.42	0.00014	0.0013	0.012	0.39	0.00029	0.0017	0.81	0.89	0.14	0.011
fat	Q9VX69	FBgn0030828	CG5162	32709	FALSE	FALSE	29.23	-0.89	7.2e-09	7.6e-07	0.41	-0.61	1.6e-06	3.2e-05	0.034	0.11	0.12	0.32
fat	Q9VZK8	FBgn0035476	CG12766	38462	TRUE	FALSE	23.43	-2.5	3.8e-07	1.2e-05	0.17	0.58	0.083	0.16	2.4e-06	0.00012	0.97	1
fat	P38040;A1ZAV4	FBgn0004921	Ggamma1	35881	FALSE	FALSE	30.26	-0.59	4.1e-05	0.00047	0.026	-0.75	2.4e-06	4.2e-05	0.33	0.51	0.009	0.12
fat	A1ZA47-2	FBgn0265991	Zasp52	36740	FALSE	FALSE	27.63	0.97	2.2e-06	4.8e-05	0.1	0.88	7.5e-06	9.9e-05	0.66	0.79	0.23	0.11
fat	Q9VQX3	FBgn0040102	lectin-24Db	53550	FALSE	FALSE	23.65	-1.3	0.0075	0.029	0.0003	-0.31	0.48	0.59	0.12	0.26	0.0028	0.85
fat	Q9VA42	FBgn0039800	Npc2g	43648	TRUE	FALSE	29.65	-0.56	0.00018	0.0015	0.011	0.96	2.2e-07	6.9e-06	4.5e-08	1e-05	0.023	1
fat	Q9VPH6;B7Z089	FBgn0036975	CG5618	40241	FALSE	FALSE	29.68	-1	8.1e-09	8.2e-07	0.42	-0.45	0.00028	0.0016	0.00082	0.0078	0.34	0.94
fat	P92192	FBgn0020644	Lcp65Ab1	48381	FALSE	FALSE	26.44	-2	4.1e-09	5.2e-07	0.46	-2	3.4e-09	2.7e-07	0.93	0.96	0.93	0.12
fat	Q9VJC0	FBgn0032652	CG6870	35067	FALSE	FALSE	25.07	-1.9	5.8e-06	0.0001	0.073	-1.2	0.001	0.0046	0.1	0.23	0.03	0.81
fat	Q9VG32;Q9VG31	FBgn0002719	Men	47173	FALSE	FALSE	36.81	0.43	0.00015	0.0013	0.014	0.26	0.01	0.029	0.19	0.35	0.2	0.1
fat	Q9VAI9	FBgn0039682	Obp99c	43494	TRUE	FALSE	31.55	-0.36	0.0011	0.0065	0.0028	0.74	3e-07	8.7e-06	1.5e-07	2.2e-05	0.0069	1
fat	Q9VKT9	FBgn0032264	Lip4	34450	FALSE	FALSE	25.04	0.66	0.013	0.044	0.00017	0.36	0.15	0.24	0.39	0.57	0.032	0.45
fat	Q9VVK7	FBgn0052190	NUCB1	39978	FALSE	FALSE	28.45	-0.27	0.047	0.12	1.8e-05	-0.065	0.61	0.71	0.27	0.44	0.0014	0.22
fat	Q7K3E2	FBgn0031313	CG5080	33299	TRUE	FALSE	31.74	-0.54	8.9e-07	2.4e-05	0.16	0.25	0.0034	0.012	5.8e-07	5.1e-05	0.2	1
fat	P07183;E1JJF7	FBgn0000360	Cp38	31788	TRUE	FALSE	30.68	1.5	0.0042	0.019	0.00084	-3.1	1.9e-06	3.6e-05	1.1e-06	7.6e-05	0.89	1
fat	Q960D3;Q9VBX3;D2A6L8	FBgn0046214	vig2	43016	TRUE	FALSE	28.73	1	3.8e-07	1.2e-05	0.21	0.032	0.8	0.86	4.5e-05	0.001	0.025	1
fat	Q9VKV1	FBgn0027611	LManII	34437	FALSE	FALSE	33.49	0.28	0.002	0.011	0.0019	0.53	2.2e-06	3.9e-05	0.033	0.11	0.017	0.21
fat	Q9V7Y2	FBgn0010591	Sply	46059	FALSE	TRUE	33.4	0.39	1.3e-05	0.0002	0.06	0.4	9.9e-06	0.00012	0.91	0.95	0.16	0.0012
fat	Q9VII1	FBgn0032897	CG9336	35355	FALSE	FALSE	29.83	-2.1	2.5e-07	9.1e-06	0.24	-1.8	2.1e-06	3.9e-05	0.42	0.59	0.26	0.46
fat	Q9W028	FBgn0035328	yellow-g2	38295	TRUE	FALSE	27.35	1.8	0.0012	0.0069	0.0034	-1.5	0.0039	0.014	8.5e-05	0.0015	0.26	1
fat	Q94920	FBgn0004363	porin	34500	FALSE	TRUE	35.76	0.26	0.0019	0.0099	0.0023	0.054	0.45	0.56	0.057	0.16	0.022	0.087
fat	Q95T88;Q5LJT3	FBgn0263830	CG40486	3355162	TRUE	FALSE	27.14	-0.67	0.00083	0.0052	0.0048	0.36	0.046	0.097	0.00039	0.0046	0.052	1
fat	Q7K221;A1ZAA5	FBgn0001124	Got1	36782	FALSE	FALSE	33.2	0.12	0.16	0.29	1.1e-06	0.37	0.0003	0.0017	0.047	0.14	0.00013	0.23
fat	Q9VL68	FBgn0032160	CG4598	34315	FALSE	FALSE	32.28	0.57	2.5e-05	0.00032	0.051	0.17	0.099	0.18	0.013	0.055	0.11	0.64
fat	Q9VPX0	FBgn0031305	Iris	33290	FALSE	FALSE	30.97	-1.1	3e-08	2e-06	0.39	-0.39	0.0046	0.016	0.00043	0.0049	0.024	0.98
fat	A1Z8D3;A1Z8D2	FBgn0061356	CG18003	3771779	FALSE	FALSE	27.38	-2.3	2.8e-07	9.8e-06	0.25	-1.5	6.9e-05	0.00054	0.06	0.16	0.098	0.87
fat	Q9VEW1	FBgn0038422	CG14880	41986	FALSE	FALSE	23.96	3.3	5.8e-05	0.00062	0.033	0.65	0.31	0.43	0.0083	0.041	0.028	0.99
fat	Q9VJ31	FBgn0032727	CG10623	35153	FALSE	TRUE	29.75	-0.44	0.0022	0.011	0.0023	-0.46	0.0018	0.0071	0.94	0.97	0.2	0.039
fat	Q70PY2	FBgn0043578	PGRP-SB1	39870	FALSE	FALSE	27.96	-0.65	0.0019	0.01	0.0027	0.086	0.64	0.73	0.0094	0.044	0.071	0.93
fat	Q9W4H6;Q7KVX1;Q7YU05	FBgn0028325	Pdha	31406	FALSE	TRUE	34.28	-0.15	0.016	0.052	0.00021	-0.28	0.00012	0.00082	0.13	0.27	0.0077	0.0081
fat	Q9VPD3	FBgn0037010	CG4825	40281	FALSE	FALSE	23.27	-1	0.037	0.096	5.1e-05	-0.18	0.69	0.77	0.21	0.38	0.055	0.77
fat	E1JI91;Q9VSW1	FBgn0035978	UGP	39065	FALSE	FALSE	36.14	0.31	1.4e-05	0.00021	0.07	0.77	2.6e-11	6.1e-09	8.4e-06	0.00029	0.0067	0.93
fat	Q9XYN7	FBgn0026380	Prosbeta3	41079	FALSE	FALSE	31.78	0.72	1.7e-06	3.8e-05	0.16	0.031	0.77	0.83	0.00017	0.0025	0.27	0.99
fat	O97125;Q9VG58;Q9BIS2;Q9BIR7;Q8INI8;P82910;P02825	FBgn0001230	Hsp68	42852	FALSE	FALSE	32.97	-0.55	2.4e-06	5.1e-05	0.14	-0.22	0.015	0.04	0.0091	0.044	0.026	0.48
fat	Q9VSP9	FBgn0035926	CG5804	39005	FALSE	FALSE	27.15	-2.5	0.03	0.083	9.3e-05	-1.9	0.1	0.18	0.66	0.79	0.38	0.59
fat	Q9VY42	FBgn0030558	CG1461	32381	FALSE	FALSE	23.32	1	0.012	0.043	0.00037	1.7	0.00027	0.0016	0.23	0.41	0.027	0.72
fat	Q5BIL9;Q95R73	FBgn0033836	CG18278	36487	FALSE	TRUE	29.21	-0.99	3e-08	2e-06	0.42	-1.1	1.1e-08	6.2e-07	0.65	0.78	0.82	0.044
fat	Q9VBU9	FBgn0039300	RpS27	43039	FALSE	FALSE	32.13	-0.63	1.7e-05	0.00025	0.071	-0.33	0.0067	0.021	0.066	0.17	0.052	0.39
fat	A1Z803	FBgn0033451	CG1665	36014	FALSE	FALSE	30.08	0.45	0.0003	0.0024	0.015	0.97	1.8e-08	9.2e-07	0.0018	0.014	0.35	0.89
fat	Q9VL67	FBgn0032161	CG4594	34316	FALSE	FALSE	28.82	0.81	3.3e-06	6.6e-05	0.14	0.44	0.0021	0.008	0.045	0.13	0.42	0.57
fat	Q9VSY4;Q9VSY4-2	FBgn0035989	CG3967	39086	FALSE	FALSE	27.05	0.26	0.039	0.1	6.2e-05	0.59	7.4e-05	0.00057	0.055	0.15	0.072	0.48
fat	A1Z6V5	FBgn0024293	Spn43Ab	45040	FALSE	FALSE	31.25	-0.47	9.6e-05	0.00094	0.031	0.14	0.16	0.26	0.00024	0.0033	0.025	0.97
fat	Q9VYU9	FBgn0030332	CG9360	32128	TRUE	FALSE	32.09	-0.94	4.9e-10	1.1e-07	0.7	0.25	0.0048	0.016	2.9e-09	1.5e-06	0.53	1
fat	Q9W440	FBgn0029838	CG4666	31541	FALSE	TRUE	31.11	-0.47	4.1e-05	0.00047	0.05	-0.58	3.3e-06	5.3e-05	0.39	0.56	0.15	0.039
fat	Q9W3N9	FBgn0029969	CG10932	31695	FALSE	TRUE	33.63	0.35	2e-05	0.00028	0.071	0.42	1.8e-06	3.5e-05	0.4	0.57	0.52	0.003
fat	Q95R34	FBgn0023525	CG3191	31209	TRUE	FALSE	26.93	-0.71	1.3e-05	0.0002	0.087	0.19	0.13	0.22	4.6e-05	0.001	0.18	1
fat	Q9V3I1;Q8IPB1	FBgn0250837	dUTPase	34529	TRUE	FALSE	28.35	2.2	1.8e-07	7.2e-06	0.31	-1.1	0.00049	0.0026	6.7e-08	1.4e-05	0.046	1
fat	Q9VTZ0	FBgn0041775	tral	39430	TRUE	FALSE	31.63	1.4	7.2e-08	3.9e-06	0.38	-0.13	0.41	0.53	2.5e-06	0.00012	0.19	1
fat	Q7JZB1	FBgn0033543	CG12338	36128	FALSE	TRUE	31.03	-0.45	8.1e-06	0.00014	0.11	-0.56	4.1e-07	1.1e-05	0.28	0.46	0.059	0.02
fat	Q9W029	FBgn0041709	yellow-g	38294	TRUE	FALSE	28.42	1.5	0.0041	0.018	0.0019	-1.8	0.001	0.0046	7.7e-05	0.0014	0.78	1
fat	Q9VBS7	FBgn0039321	CG10550	43061	FALSE	FALSE	29.04	-0.6	1.5e-06	3.6e-05	0.2	-0.0082	0.92	0.95	0.00011	0.0019	0.19	0.97
fat	Q9W374	FBgn0086450	su(r)	31858	FALSE	TRUE	33.71	0.62	4.7e-07	1.4e-05	0.27	0.67	1.7e-07	5.6e-06	0.69	0.81	0.15	0.0095
fat	Q0KIB3	FBgn0037376	Hat1	40716	TRUE	FALSE	27.18	1.2	8.5e-07	2.3e-05	0.23	-0.43	0.014	0.038	1.3e-06	8.5e-05	0.057	1
fat	Q9VVL5	FBgn0036760	CG5567	39986	TRUE	FALSE	30.96	-0.49	3e-06	6.1e-05	0.16	0.29	0.00081	0.0038	5.8e-07	5.1e-05	0.16	1
fat	Q9VAC1;Q8IMJ8	FBgn0039737	CG7920	43562	FALSE	FALSE	36.31	0.28	0.0028	0.014	0.0029	0.056	0.49	0.61	0.066	0.17	0.0031	0.16
fat	P14199	FBgn0003231	ref(2)P	35246	TRUE	FALSE	29.75	0.6	5.6e-06	9.9e-05	0.13	-0.11	0.28	0.39	5e-05	0.0011	0.022	0.99
fat	Q9VMP9	FBgn0031717	Oscillin	33783	FALSE	TRUE	30.77	0.3	0.0026	0.013	0.0033	0.45	4.9e-05	0.00041	0.21	0.38	0.016	0.07
fat	Q7KSW3;Q9VHZ5	FBgn0051472	sgll	40925	FALSE	TRUE	30.05	0.4	1.2e-05	0.00019	0.099	0.59	7.6e-08	2.9e-06	0.066	0.17	0.63	0.061
fat	Q9V597	FBgn0025286	RpL31	35988	FALSE	FALSE	32.62	0.81	0.00043	0.0031	0.015	0.65	0.0028	0.01	0.56	0.71	0.032	0.25
fat	Q9Y136	FBgn0027578	CG14526	43413	FALSE	FALSE	29.36	-0.48	1e-07	4.9e-06	0.38	0.059	0.31	0.42	2.5e-06	0.00012	0.037	0.99
fat	Q9V461	FBgn0025815	Mcm6	31603	TRUE	FALSE	25.92	3.6	1.2e-07	5.2e-06	0.37	0.0051	0.99	0.99	1.2e-05	0.00037	0.036	1
fat	E1JHT6;Q9VMV9;Q7KTP4;E1JHT9;Q9VMW4	FBgn0053113	Rtnl1	33721	FALSE	TRUE	33	0.47	1.5e-05	0.00022	0.094	0.66	1.8e-07	5.8e-06	0.11	0.25	0.16	0.096
fat	Q9VB81	FBgn0039481	Cpr97Eb	43259	FALSE	TRUE	31.94	0.28	0.036	0.094	0.00012	0.29	0.028	0.065	0.93	0.96	0.19	0.037
fat	Q9VM80	FBgn0031860	CG11236	33955	FALSE	FALSE	29.66	-0.55	2.6e-05	0.00034	0.076	-0.32	0.0042	0.014	0.11	0.25	0.057	0.22
fat	Q8T9E6	FBgn0264494	CG17646	33354	FALSE	FALSE	29.26	-0.91	1.8e-07	7e-06	0.35	-0.56	8.4e-05	0.00063	0.036	0.12	0.045	0.53
fat	Q9W388;Q7KVR7;Q86B59;Q7KVR8	FBgn0030089	AP-1gamma	31842	FALSE	FALSE	27.14	-0.81	8.4e-05	0.00084	0.044	-0.39	0.024	0.057	0.083	0.2	0.11	0.63
fat	Q8IN25	FBgn0051198	CG31198	318622	FALSE	FALSE	26.87	-1.2	0.00014	0.0013	0.034	-0.07	0.77	0.84	0.0049	0.028	0.17	0.98
fat	Q9VH57	FBgn0037763	CG16904	41212	FALSE	TRUE	28.87	-0.66	0.00054	0.0037	0.014	-0.63	0.00075	0.0036	0.92	0.95	0.073	0.084
fat	A1Z992	FBgn0053138	AGBE	326264	FALSE	TRUE	35.05	-0.26	0.0001	0.00097	0.042	-0.027	0.61	0.7	0.0055	0.031	0.27	0.083
fat	A8JUV4	FBgn0085362	Vml	5740271	TRUE	FALSE	28.68	2.3	2e-06	4.5e-05	0.2	-0.15	0.65	0.74	6.2e-05	0.0012	0.73	1
fat	Q9W1T6	FBgn0085400	side-V	37679	FALSE	TRUE	28.61	-0.95	2.3e-07	8.6e-06	0.35	-0.85	1.1e-06	2.4e-05	0.54	0.7	0.24	0.084
fat	Q8IQZ7;Q8IQZ8	FBgn0024238	Fim	32721	FALSE	FALSE	30.7	-0.53	1.7e-05	0.00025	0.097	-0.058	0.53	0.64	0.0018	0.014	0.12	0.84
fat	Q9VRY5	FBgn0035714	CG8549	38749	FALSE	TRUE	29.41	0.32	0.0032	0.015	0.0034	0.43	0.0002	0.0013	0.39	0.56	0.3	0.053
fat	Q7KT11;Q9VIJ0;Q8SZU0;Q7KT12	FBgn0032889	CG9331	35347	FALSE	FALSE	34.05	-0.25	0.0093	0.034	0.001	-0.055	0.54	0.65	0.12	0.26	0.0013	0.13
fat	Q7JQH9;Q9V3K9	FBgn0261862	whd	36109	FALSE	TRUE	32.12	0.41	7e-06	0.00012	0.14	0.4	1e-05	0.00012	0.9	0.94	0.94	0.0011
fat	Q9VXK0	FBgn0030724	Nipsnap	32573	FALSE	TRUE	32.25	0.24	0.022	0.065	0.00033	0.2	0.052	0.11	0.76	0.86	0.00069	0.02
fat	Q9VMC6	FBgn0031824	CG9547	33911	FALSE	FALSE	29.92	0.43	0.00061	0.0041	0.014	-0.03	0.78	0.84	0.0057	0.031	0.028	0.79
fat	Q9W350	FBgn0040236	c11.1	53436	FALSE	FALSE	27.16	-0.75	1e-06	2.7e-05	0.25	-0.59	2.2e-05	0.00022	0.28	0.46	0.71	0.12
fat	Q7JXC4	FBgn0034259	P32	37006	FALSE	FALSE	32.03	0.56	2.1e-06	4.7e-05	0.21	0.13	0.14	0.23	0.0014	0.012	0.054	0.79
fat	Q8IP52;Q7KT96	FBgn0263038	CG43333	34830	FALSE	FALSE	25.41	0.41	0.0034	0.016	0.0035	-0.13	0.29	0.4	0.0054	0.03	0.74	0.88
fat	Q7KVF1;Q9W0X0	FBgn0010435	emp	37999	FALSE	TRUE	30.74	-0.42	4.3e-05	0.00049	0.07	-0.4	8.1e-05	0.00061	0.83	0.9	0.14	0.0053
fat	A1Z8Y3	FBgn0050042	Cpr49Ab	36345	FALSE	FALSE	35.54	0.37	0.00096	0.0058	0.011	-0.24	0.02	0.049	0.00023	0.0032	0.041	0.97
fat	Q9VZL1;Q9I7T5	FBgn0035473	mge	38459	FALSE	FALSE	28.93	0.37	0.007	0.028	0.0016	0.058	0.64	0.73	0.086	0.21	0.058	0.44
fat	Q9VLP1	FBgn0032022	CG14275	34144	FALSE	FALSE	24.87	-1.1	0.00015	0.0013	0.038	-0.2	0.38	0.5	0.013	0.055	0.034	0.94
fat	Q8MMD3;Q8MMD2;Q9W111	FBgn0035060	Eps-15	37961	FALSE	FALSE	28.3	0.21	0.031	0.084	0.00022	0.025	0.78	0.85	0.16	0.31	0.04	0.12
fat	Q9XYU1	FBgn0024332	Mcm3	31449	TRUE	FALSE	26.6	3.4	3.7e-07	1.2e-05	0.33	-0.54	0.23	0.33	5.2e-06	0.00021	0.11	1
fat	Q56JH9;A1Z9P0;A1Z9N8;B7YZE7;B7YZE8;A1Z9N7;B7YZE9	FBgn0263397	Ih	36589	FALSE	FALSE	25.57	-1.3	0.0019	0.01	0.0064	-0.27	0.47	0.58	0.055	0.15	0.12	0.91
fat	A1Z6X6	FBgn0033162	Glo1	35656	FALSE	TRUE	31.37	0.32	0.00045	0.0032	0.02	0.4	5.1e-05	0.00043	0.48	0.65	0.098	0.012
fat	B7YZQ1;Q9W179;Q8MLP1;Q59E61	FBgn0035001	Slik	37893	FALSE	FALSE	24.76	3.4	1.1e-05	0.00018	0.13	2.7	0.0002	0.0013	0.34	0.52	0.61	0.71
fat	Q9W141;Q9W141-2	FBgn0035032	ATPsynF	37931	FALSE	FALSE	33.54	-0.37	4e-05	0.00047	0.077	-0.089	0.21	0.32	0.0091	0.044	0.037	0.28
fat	Q9VZ24	FBgn0030272	CG15201	32053	FALSE	FALSE	29.56	-0.8	5.9e-05	0.00062	0.065	-0.67	0.00034	0.0019	0.57	0.72	0.033	0.16
fat	Q9V5C6	FBgn0023175	Prosalpha7	36018	FALSE	FALSE	32.72	0.49	1.3e-05	0.0002	0.13	0.24	0.0087	0.026	0.047	0.14	0.43	0.21
fat	Q961T9	FBgn0053307	CG33307	2768914	TRUE	FALSE	29.52	-0.64	0.00043	0.0031	0.022	0.83	2.8e-05	0.00026	1.7e-06	0.0001	0.023	1
fat	Q8SY97	FBgn0053178	CG33178	318913	FALSE	FALSE	26.53	-0.44	0.0078	0.03	0.0017	0.021	0.89	0.92	0.04	0.12	0.044	0.72
fat	Q7JXF7	FBgn0263260	sel	36046	FALSE	FALSE	28.95	-0.78	1.8e-05	0.00025	0.11	-0.26	0.065	0.13	0.014	0.058	0.85	0.82
fat	Q9VRD9	FBgn0031148	Cbs	33081	TRUE	FALSE	27.77	2.9	8.6e-09	8.2e-07	0.62	0.79	0.014	0.037	5.7e-05	0.0012	0.012	1
fat	Q9VG97	FBgn0010039	GstD3	48336	FALSE	FALSE	25.31	2.5	6e-06	0.0001	0.17	1	0.016	0.042	0.017	0.069	0.19	0.97
fat	O97394;E1JJC3;O97394-2	FBgn0021764	sdk	31017	FALSE	FALSE	26.46	-1.1	0.0032	0.015	0.0048	-0.42	0.2	0.31	0.16	0.31	0.05	0.76
fat	Q9VPR1	FBgn0031263	Tspo	33231	FALSE	FALSE	27.96	-0.87	5.6e-06	9.9e-05	0.18	-0.48	0.0023	0.0088	0.06	0.16	0.5	0.59
fat	Q9V393	FBgn0040206	krz	53554	FALSE	FALSE	29.2	-0.36	2e-05	0.00028	0.12	0.14	0.039	0.085	2.5e-05	0.00064	0.24	0.95
fat	Q9VXY3	FBgn0030612	CG5599	32441	FALSE	FALSE	31.34	0.29	7.5e-05	0.00076	0.066	0.58	6.9e-09	4.5e-07	0.0018	0.014	0.26	0.28
fat	Q9VR96	FBgn0031111	Obp19c	33039	TRUE	FALSE	26.21	1.8	8e-05	0.00081	0.063	-2.2	6.7e-06	9e-05	2.5e-07	3.1e-05	0.12	1
fat	B7YZQ7	FBgn0016687	Nurf-38	37922	FALSE	FALSE	34.87	0.2	0.0055	0.023	0.0029	0.55	7.9e-08	3e-06	0.00096	0.0088	0.028	0.56
fat	Q9W2U7	FBgn0261710	nocte	31976	FALSE	TRUE	27.95	0.59	0.00051	0.0036	0.022	0.65	0.00021	0.0013	0.77	0.87	0.47	0.084
fat	Q9VB69;E1JIZ5;E1JIZ4	FBgn0029155	Men-b	43936	FALSE	FALSE	30.27	-0.41	0.00015	0.0014	0.046	-0.78	4e-08	1.7e-06	0.0063	0.034	0.011	0.6
fat	O96827	FBgn0028737	eEF1beta	45249	FALSE	TRUE	33.69	0.38	1.9e-05	0.00027	0.12	0.18	0.014	0.039	0.043	0.13	0.14	0.079
fat	Q9VBQ5	FBgn0039341	CG5112	43083	FALSE	TRUE	30.61	-0.41	1.7e-06	3.9e-05	0.26	-0.55	2.3e-08	1.2e-06	0.093	0.22	0.57	0.015
fat	Q9V9X4	FBgn0039849	CG11334	43713	FALSE	TRUE	33.17	0.36	0.00052	0.0036	0.023	0.43	7.6e-05	0.00058	0.54	0.7	0.13	0.019
fat	Q9VAJ4	FBgn0039678	Obp99a	43488	TRUE	FALSE	30.76	-0.52	0.00051	0.0036	0.023	0.67	3.8e-05	0.00034	2.3e-06	0.00012	0.018	1
fat	Q9VFE4	FBgn0038277	RpS5b	41807	TRUE	FALSE	28.72	2.6	1.4e-06	3.4e-05	0.28	-1.2	0.0041	0.014	8.9e-07	6.6e-05	0.14	1
fat	Q961V3;Q7KRU0;Q8IMI0;Q9VA53	FBgn0039790	CG2246	43637	FALSE	TRUE	29.82	0.51	2.7e-06	5.6e-05	0.24	0.47	7.3e-06	9.7e-05	0.72	0.84	0.57	0.0055
fat	Q9VHE5	FBgn0037686	RpL34b	41120	FALSE	FALSE	31.9	-0.6	6.2e-05	0.00065	0.077	-0.79	2.4e-06	4.2e-05	0.27	0.45	0.068	0.18
fat	Q7KR04	FBgn0033555	RpS15Ab	36142	TRUE	FALSE	25.39	-1.1	2.8e-07	9.7e-06	0.4	0.025	0.86	0.9	1.8e-05	0.00052	0.17	1
fat	P22058;A4V2K7	FBgn0000412	D1	41095	FALSE	FALSE	27.58	1.6	3.2e-07	1.1e-05	0.39	0.97	0.00019	0.0012	0.035	0.11	0.61	0.86
fat	Q7K3N4	FBgn0033679	CG8888	36293	FALSE	FALSE	30.77	-0.64	1.6e-05	0.00023	0.14	-0.44	0.00077	0.0037	0.21	0.38	0.41	0.19
fat	Q8MLS2	FBgn0050410	Rpi	246599	FALSE	FALSE	30.46	0.38	0.0043	0.019	0.0044	0.23	0.059	0.12	0.38	0.56	0.41	0.12
fat	P18930	FBgn0013681	mt:ND3	192475	FALSE	FALSE	27.76	-0.43	0.0036	0.017	0.0053	0.1	0.42	0.54	0.0086	0.042	0.38	0.85
fat	Q9V968	FBgn0034543	galla-1	246485	FALSE	FALSE	24.18	-1	0.0005	0.0035	0.026	-0.29	0.24	0.35	0.045	0.13	0.026	0.87
fat	Q8MST5;Q9VAX7;CON__ENSEMBL:ENSBTAP00000025008	FBgn0003890	betaTub97EF	43359	FALSE	TRUE	33.72	0.36	0.00023	0.0019	0.041	0.47	1.2e-05	0.00014	0.33	0.51	0.13	0.026
fat	Q9VF24	FBgn0265048	cv-d	41921	TRUE	FALSE	29.41	-1.3	5.1e-10	1.1e-07	0.81	0.49	0.00036	0.002	9.3e-10	6.7e-07	0.49	1
fat	Q9VGF1	FBgn0037975	CG3397	41454	TRUE	FALSE	31.23	-0.42	0.0032	0.015	0.0063	0.82	3.9e-06	5.8e-05	1.5e-06	9.5e-05	0.55	1
fat	Q9VJG4	FBgn0040985	CG6115	50459	FALSE	TRUE	27.28	0.25	0.011	0.039	0.0016	0.37	0.00055	0.0028	0.34	0.52	0.003	0.048
fat	Q9VBS3	FBgn0039325	CG10560	43065	FALSE	FALSE	26.78	-0.83	0.00012	0.0011	0.061	-0.76	0.00029	0.0017	0.78	0.87	0.8	0.13
fat	Q9VHV3	FBgn0037552	CG7800	40963	FALSE	TRUE	26.21	-0.41	0.011	0.039	0.0018	-0.45	0.0055	0.018	0.82	0.9	0.0056	0.082
fat	Q9Y163;Q8I930;Q9VR47	FBgn0041150	hoe1	249663	TRUE	FALSE	25.08	2.9	1.7e-06	3.8e-05	0.29	-0.48	0.25	0.36	1.9e-05	0.00052	0.23	1
fat	Q9W3U9	FBgn0029915	CG14434	31632	FALSE	FALSE	26.71	1.1	3.9e-05	0.00046	0.11	0.62	0.0058	0.019	0.12	0.26	0.027	0.66
fat	Q9VW05	FBgn0036881	Cpr76Bd	40123	FALSE	FALSE	34.77	-0.44	4.8e-05	0.00054	0.098	-0.25	0.007	0.022	0.12	0.26	0.2	0.11
fat	P98163;P98163-2	FBgn0004649	yl	32367	TRUE	FALSE	29.12	2.7	5.4e-05	0.00059	0.093	-0.81	0.12	0.21	0.00013	0.0021	0.086	1
fat	Q95T98	FBgn0051523	CG31523	326148	FALSE	FALSE	30.81	0.39	0.0065	0.026	0.0034	0.92	1.1e-06	2.3e-05	0.0087	0.042	0.012	0.85
fat	Q9VQI7	FBgn0031479	Prx6005	33493	FALSE	FALSE	30.21	0.44	0.00015	0.0014	0.057	0.21	0.038	0.084	0.088	0.21	0.54	0.21
fat	Q9V3G8	FBgn0028938	CG16886	34809	FALSE	TRUE	28.26	-0.48	0.0014	0.0081	0.014	-0.38	0.008	0.024	0.59	0.73	0.035	0.098
fat	Q24238;Q24238-2	FBgn0016123	Alp4	43671	FALSE	FALSE	27.21	-1.2	0.0097	0.035	0.0022	-2.1	8.2e-05	0.00062	0.14	0.29	0.18	0.83
fat	Q9W258	FBgn0034724	babos	37557	FALSE	FALSE	30.34	-0.88	7.1e-07	2e-05	0.36	-0.54	0.00024	0.0014	0.055	0.15	0.04	0.5
fat	Q9W3E8	FBgn0014465	Cp7Fb	31785	TRUE	FALSE	26.09	2	3.6e-06	6.9e-05	0.25	-2.2	1.1e-06	2.3e-05	1.4e-08	5.6e-06	0.1	1
fat	Q9VXX8	FBgn0030616	RpL37a	32446	FALSE	FALSE	30.38	-0.55	0.0016	0.0087	0.013	-0.29	0.06	0.12	0.24	0.41	0.015	0.34
fat	Q8SYL1	FBgn0022288	l(2)09851	46662	TRUE	FALSE	27	0.57	0.0001	0.00097	0.073	-0.31	0.015	0.039	3.9e-05	0.00089	0.0094	1
fat	A1Z843	FBgn0033482	CG1371	36053	FALSE	TRUE	32.03	-0.2	0.01	0.037	0.0021	-0.28	0.00087	0.004	0.43	0.61	0.86	0.0092
fat	Q9XZ63	FBgn0027095	Manf	41983	FALSE	FALSE	28.5	-0.32	0.015	0.05	0.0013	0.11	0.38	0.5	0.021	0.078	0.46	0.69
fat	Q9VBV5	FBgn0039296	CG10420	43034	FALSE	FALSE	27.04	-0.79	2.1e-05	0.00029	0.15	-0.29	0.051	0.1	0.019	0.073	0.4	0.79
fat	Q9VFQ9	FBgn0000454	Dip-B	48450	FALSE	TRUE	32.3	0.28	0.004	0.018	0.0064	0.12	0.17	0.27	0.2	0.37	0.013	0.072
fat	P41044	FBgn0004580	Cbp53E	36905	TRUE	FALSE	27.72	-1.1	3.8e-05	0.00045	0.12	0.074	0.72	0.8	0.00068	0.0069	0.24	1
fat	Q8SXA4;A8DY91;P31396;A1Z858	FBgn0000448	Hr3	36073	TRUE	FALSE	24.19	2.7	6.7e-07	1.9e-05	0.38	-0.023	0.95	0.97	4.6e-05	0.001	0.92	1
fat	Q9I7I3	FBgn0051199	CG31199	42456	FALSE	FALSE	27.34	0.59	0.00054	0.0037	0.031	-0.14	0.35	0.46	0.0018	0.014	0.22	0.97
fat	Q8IQH6;Q9VU17	FBgn0036316	CG10960	39458	FALSE	FALSE	31.49	0.37	0.0053	0.022	0.005	0.5	0.00045	0.0024	0.44	0.61	0.0072	0.11
fat	Q7KV70;A8JNJ6;Q9VZQ3;Q7KV69	FBgn0004167	kst	38418	FALSE	TRUE	33.58	0.44	8.8e-07	2.4e-05	0.36	0.48	2.5e-07	7.5e-06	0.63	0.76	0.49	0.0012
fat	Q9VIB3	FBgn0015576	alpha-Est8	40899	TRUE	FALSE	26.57	-1.4	1.3e-06	3.2e-05	0.34	0.045	0.82	0.87	6e-05	0.0012	0.15	1
fat	Q9VIV8	FBgn0032788	CG13084	35229	TRUE	FALSE	29.44	1.2	0.0008	0.005	0.024	-0.36	0.24	0.35	0.0017	0.013	0.79	1
fat	Q9VAM2	FBgn0039656	CG11951	43463	FALSE	FALSE	25.26	0.69	0.35	0.5	1.1e-06	0.61	0.41	0.52	0.94	0.96	0.0086	0.4
fat	Q5U126	FBgn0250833	CG34461	5740547	FALSE	FALSE	32.32	-0.47	0.0009	0.0055	0.023	-0.22	0.075	0.14	0.16	0.31	0.15	0.29
fat	Q7KKI0;A1Z8U4	FBgn0010621	CCT5	36308	TRUE	FALSE	32.38	0.68	9.7e-08	4.7e-06	0.54	0.0018	0.98	0.99	1e-05	0.00033	0.066	1
fat	Q8IQN2;Q9VUY1	FBgn0036566	ClC-c	39759	FALSE	FALSE	25.8	-0.82	0.00037	0.0028	0.041	-0.037	0.84	0.89	0.0085	0.042	0.67	0.94
fat	Q9VJ43	FBgn0015808	ScpX	44183	FALSE	TRUE	31.84	-0.36	4.8e-05	0.00054	0.11	-0.19	0.011	0.032	0.093	0.22	0.066	0.045
fat	Q9VN01	FBgn0037230	CG9780	40540	FALSE	FALSE	24.35	-2.2	0.0025	0.012	0.011	-1	0.12	0.21	0.2	0.36	0.041	0.82
fat	O76752	FBgn0014032	Sptr	31781	FALSE	TRUE	30.18	0.31	5.9e-05	0.00063	0.11	0.28	0.00019	0.0012	0.71	0.82	0.58	0.00097
fat	Q9VDJ8	FBgn0038819	Cpr92F	42450	FALSE	FALSE	33.73	0.71	0.0034	0.016	0.0083	0.78	0.0016	0.0067	0.81	0.89	0.21	0.19
fat	P36188-4;P36188-5	FBgn0004028	wupA	32794	FALSE	TRUE	27.76	-0.47	0.0002	0.0017	0.06	-0.37	0.0018	0.0072	0.49	0.65	0.09	0.057
fat	Q27415-2;Q27415	FBgn0016685	Nlp	43560	TRUE	FALSE	31.73	0.62	8.1e-08	4.2e-06	0.56	-0.36	9.1e-05	0.00067	1.6e-08	5.6e-06	0.079	1
fat	Q9VZZ5	FBgn0035356	CG16986	38325	FALSE	FALSE	29.1	-0.84	2.3e-06	5e-05	0.31	-0.1	0.4	0.52	0.00051	0.0055	0.52	0.98
fat	Q9VCJ8;Q8IN70	FBgn0039102	SPE	42791	FALSE	FALSE	29.03	-0.33	0.022	0.066	0.0011	-0.43	0.0043	0.014	0.59	0.74	0.021	0.11
fat	Q7KN94	FBgn0010516	wal	36252	FALSE	FALSE	35.58	0.2	0.004	0.018	0.0076	0.45	1.1e-06	2.3e-05	0.012	0.053	0.034	0.14
fat	Q9VIF2	FBgn0032923	CG9248	35384	FALSE	FALSE	30.31	-0.71	8.4e-09	8.2e-07	0.71	-0.24	0.0034	0.012	0.00015	0.0023	0.67	0.91
fat	Q9VXT7	FBgn0030653	CG7860	32488	FALSE	FALSE	26.78	0.64	0.024	0.071	0.00097	1.8	2.5e-06	4.3e-05	0.0066	0.035	0.029	0.98
fat	P37276-2;P37276	FBgn0261797	Dhc64C	38580	FALSE	TRUE	32.75	-0.21	0.00043	0.0031	0.041	-0.22	0.0003	0.0017	0.91	0.95	0.33	7.6e-05
fat	Q9VKJ6	FBgn0027582	CG6230	34546	FALSE	TRUE	27.84	-0.49	9e-06	0.00015	0.22	-0.58	9.8e-07	2.2e-05	0.42	0.6	0.23	0.021
fat	Q9VAP3	FBgn0039637	Ctl2	43440	FALSE	FALSE	24.54	-2.3	2.6e-05	0.00033	0.15	-2.7	3.7e-06	5.7e-05	0.5	0.67	0.86	0.53
fat	P54352-2;P54352;P54352-3	FBgn0000536	eas	32585	FALSE	FALSE	30.41	-0.51	4.1e-05	0.00047	0.13	0.072	0.46	0.57	0.00039	0.0045	0.015	0.96
fat	Q9VAL7;Q0KHZ9;Q9VXF6;Q9I7S9	FBgn0015622	Cnx99A	44643	FALSE	FALSE	30.41	-0.24	0.0039	0.018	0.0082	0.21	0.011	0.031	0.0004	0.0046	0.086	0.85
fat	Q7K172	FBgn0034176	ste24a	36908	FALSE	FALSE	27.28	-1.4	7.7e-05	0.00079	0.1	-1.6	1.8e-05	0.00019	0.63	0.76	0.1	0.35
fat	P42271	FBgn0010097	gammaTub37C	35199	TRUE	FALSE	24.52	2	3.1e-07	1.1e-05	0.47	-0.4	0.12	0.21	2.8e-06	0.00013	0.27	1
fat	P17276;Q59E23	FBgn0001208	Hn	38871	FALSE	FALSE	33.19	0.24	0.0018	0.0098	0.016	0.79	8.2e-10	8.8e-08	1.9e-05	0.00053	0.048	0.98
fat	Q9XZ61;Q9VYQ3	FBgn0051639	CG31639	39102	FALSE	TRUE	31.14	0.55	1.3e-06	3.2e-05	0.37	0.37	0.00014	0.00096	0.11	0.25	0.6	0.076
fat	Q8SZ15	FBgn0034307	CG10914	37075	FALSE	FALSE	24.06	-1.2	0.053	0.13	0.00029	-0.91	0.14	0.23	0.72	0.84	0.0014	0.48
fat	Q7KT36;Q9VIV7	FBgn0032789	CG13083	35230	TRUE	FALSE	28.97	1.6	0.00044	0.0032	0.044	-0.75	0.054	0.11	0.00029	0.0037	0.76	1
fat	O18335	FBgn0015790	Rab11	42501	FALSE	TRUE	31.47	0.24	0.0011	0.0065	0.025	0.13	0.049	0.1	0.23	0.4	0.06	0.0076
fat	Q9V8F5	FBgn0034328	IM23	37099	FALSE	FALSE	29.33	-0.91	0.00025	0.002	0.062	-0.87	0.00039	0.0021	0.88	0.93	0.25	0.15
fat	Q9VW73	FBgn0036932	CG14184	40193	FALSE	FALSE	27.51	0.45	0.00066	0.0043	0.035	0.82	6.9e-07	1.7e-05	0.028	0.098	0.11	0.57
fat	Q9VI25	FBgn0037447	Neurochondrin	40796	FALSE	FALSE	31.11	-0.43	3e-05	0.00038	0.16	0.094	0.24	0.35	0.00015	0.0024	0.32	0.94
fat	O77434	FBgn0260855	Sec22	31030	FALSE	FALSE	28.69	-0.18	0.085	0.18	0.00014	0.42	0.0004	0.0022	0.00039	0.0045	0.0057	0.96
fat	P10379	FBgn0004055	uzip	38002	FALSE	FALSE	28.49	-0.76	1.5e-08	1.2e-06	0.71	-0.49	7.1e-06	9.6e-05	0.023	0.083	0.52	0.27
fat	Q9VE17	FBgn0261792	snRNP-U1-C	42274	FALSE	FALSE	24.35	-2.4	8.3e-05	0.00083	0.11	-0.61	0.22	0.33	0.015	0.061	0.69	0.98
fat	Q9Y143	FBgn0027586	CG5867	34728	FALSE	FALSE	29.91	-0.97	6.2e-08	3.6e-06	0.62	-0.69	6.4e-06	8.7e-05	0.086	0.21	0.35	0.35
fat	Q7KTW5	FBgn0037063	CG9391	40346	FALSE	FALSE	31.6	0.37	0.00067	0.0044	0.037	0.74	1.6e-07	5.4e-06	0.008	0.04	0.64	0.61
fat	Q9VUQ5;Q9VUQ5-2	FBgn0087035	AGO2	39683	FALSE	FALSE	30.35	-0.39	5.4e-05	0.00058	0.13	-0.031	0.68	0.76	0.003	0.02	0.01	0.56
fat	Q9W011	FBgn0035344	Cyp4d20	38311	FALSE	FALSE	27.36	-0.65	1.3e-05	0.0002	0.22	-0.48	0.00034	0.0019	0.29	0.47	0.22	0.14
fat	Q9VD58	FBgn0038922	Idh3b	42586	FALSE	FALSE	33.02	-0.45	3.7e-07	1.2e-05	0.49	-0.2	0.0024	0.0091	0.0069	0.036	0.39	0.13
fat	P39018;E2QD65	FBgn0010412	RpS19a	32635	FALSE	FALSE	33.63	-0.43	1.3e-05	0.0002	0.22	-0.14	0.061	0.12	0.012	0.051	0.21	0.31
fat	Q9VWW0-4;Q9VWW0-3;Q9VWW0;Q9VWW0-5;Q9VWW0-2	FBgn0265784	CrebB	32817	FALSE	FALSE	24.68	1.6	0.0056	0.023	0.0075	0.25	0.62	0.71	0.078	0.19	0.004	0.91
fat	Q9W2G8	FBgn0034629	Acox57D-d	37446	FALSE	FALSE	30.39	-0.83	4.8e-07	1.4e-05	0.47	-0.19	0.1	0.18	0.00052	0.0056	0.81	0.97
fat	A8JV30	FBgn0085356	CG34327	5740714	FALSE	FALSE	32.4	-0.85	3.4e-07	1.1e-05	0.5	-0.62	1.9e-05	0.00019	0.15	0.31	0.25	0.23
fat	Q9XTL9;A4UZZ4	FBgn0004507	GlyP	33386	FALSE	TRUE	38.06	-0.19	0.0072	0.028	0.006	-0.4	4.8e-06	6.9e-05	0.026	0.092	0.022	0.074
fat	O44386-2;O44386	FBgn0003328	scb	36692	FALSE	FALSE	25.85	-1	2.8e-06	5.6e-05	0.34	-0.14	0.37	0.49	0.00065	0.0066	0.11	0.99
fat	A1ZBJ2	FBgn0034432	CG7461	37217	FALSE	TRUE	35.43	0.33	2.5e-05	0.00032	0.19	0.24	0.00061	0.003	0.3	0.48	0.08	0.0029
fat	P48605;A4V303	FBgn0015019	CCT3	42029	FALSE	FALSE	32.47	0.55	1.4e-06	3.4e-05	0.4	-0.069	0.38	0.5	2.4e-05	0.00063	0.029	0.99
fat	Q9VS22	FBgn0250836	CG8628	38783	FALSE	FALSE	25.05	-4	4e-06	7.4e-05	0.32	-1.7	0.014	0.037	0.014	0.06	0.86	0.98
fat	O62602;REV__Q9VVZ0	FBgn0261524	lic	32257	FALSE	TRUE	28.83	0.46	8.2e-06	0.00014	0.26	0.36	0.00012	0.00086	0.37	0.54	0.65	0.016
fat	Q9VQR0	FBgn0031538	CG3246	33564	FALSE	FALSE	29.27	-0.34	0.00024	0.002	0.073	0.16	0.047	0.1	0.00017	0.0026	0.14	0.93
fat	Q9V3D9	FBgn0010747	Srp54k	38593	FALSE	FALSE	30.31	-0.41	0.0013	0.0072	0.027	-0.046	0.68	0.76	0.027	0.095	0.077	0.57
fat	Q9VCH8	FBgn0039117	tst	42813	FALSE	FALSE	26.49	1.1	0.00042	0.0031	0.055	0.12	0.67	0.75	0.013	0.056	0.18	0.96
fat	Q95WY3	FBgn0038964	Nop56	42633	FALSE	FALSE	31.41	-0.29	0.0016	0.0087	0.024	-0.87	2.6e-09	2.1e-07	7.3e-05	0.0014	0.0062	0.97
fat	Q9W380	FBgn0040931	CG9034	50405	FALSE	FALSE	29.07	-0.51	0.00059	0.004	0.046	-0.65	5.1e-05	0.00043	0.43	0.61	0.19	0.13
fat	Q7JYZ0	FBgn0034162	CG6426	36891	FALSE	FALSE	27.2	-0.62	0.00015	0.0013	0.095	-0.043	0.74	0.81	0.0056	0.031	0.15	0.89
fat	O97069	FBgn0026565	Ass	40812	TRUE	FALSE	29.61	-0.81	1.7e-07	6.9e-06	0.57	0.057	0.56	0.67	7e-06	0.00025	0.39	1
fat	Q9VL01	FBgn0032213	CG5390	34383	FALSE	FALSE	31.53	-0.31	0.00049	0.0035	0.052	0.056	0.45	0.56	0.0023	0.017	0.13	0.58
fat	Q9W0P5	FBgn0035147	Gale	38076	FALSE	FALSE	33.01	0.24	0.0018	0.0097	0.023	0.77	7e-10	7.8e-08	1.6e-05	0.00047	0.07	0.98
fat	Q9W4M3	FBgn0041252	Femcoat	31367	TRUE	FALSE	26.54	1.9	0.00024	0.0019	0.079	-1.1	0.015	0.039	7e-05	0.0013	0.93	1
fat	Q4QQB9	FBgn0034398	CG15098	37174	TRUE	FALSE	24.47	-2.3	0.00032	0.0025	0.067	0.19	0.71	0.79	0.0032	0.021	0.14	1
fat	Q9VV43	FBgn0266417	ringer	39813	FALSE	TRUE	29.35	-0.95	2.2e-06	4.8e-05	0.38	-1	1.1e-06	2.4e-05	0.8	0.88	0.069	0.077
fat	Q9I7U4-3	FBgn0086906	sls	44013	FALSE	TRUE	35.45	-0.3	0.00019	0.0016	0.089	-0.35	3e-05	0.00028	0.55	0.71	0.56	0.0025
fat	Q9VNA3	FBgn0037312	CG11999	40637	FALSE	FALSE	28.98	-0.5	0.00052	0.0036	0.053	-0.26	0.044	0.095	0.16	0.31	0.66	0.29
fat	Q9VWE9;Q9V668	FBgn0031049	Sec61gamma	32968	FALSE	FALSE	28.52	-1	7.1e-06	0.00012	0.29	-0.32	0.066	0.13	0.007	0.036	0.7	0.93
fat	Q9VVH5	FBgn0036728	UQCR-Q	39950	FALSE	FALSE	32.91	-0.43	0.015	0.05	0.0031	-0.59	0.0018	0.0071	0.49	0.65	0.007	0.22
fat	Q9VLJ6	FBgn0016122	Acer	34189	TRUE	FALSE	30.72	-0.41	0.0011	0.0063	0.034	0.72	2.5e-06	4.3e-05	6e-07	5.1e-05	0.043	1
fat	Q9VMY9	FBgn0261436	DhpD	40528	FALSE	FALSE	32.12	0.24	0.023	0.068	0.002	0.65	2.7e-06	4.5e-05	0.0074	0.038	0.061	0.7
fat	Q8SXC0	FBgn0036759	CG5577	39985	TRUE	FALSE	30.06	-0.4	8.9e-05	0.00087	0.13	0.44	2.6e-05	0.00025	6.3e-07	5.1e-05	0.056	1
fat	Q94518	FBgn0086904	Nacalpha	36409	FALSE	FALSE	32.5	0.34	0.0062	0.025	0.0087	0.19	0.1	0.18	0.35	0.52	0.11	0.11
fat	Q9Y140	FBgn0027583	CG7601	43502	FALSE	FALSE	29.05	-0.84	3.8e-06	7.2e-05	0.34	-0.22	0.1	0.19	0.0029	0.02	0.26	0.93
fat	Q24090	FBgn0011715	Snr1	40657	TRUE	FALSE	24.13	2.1	1e-06	2.7e-05	0.45	-0.52	0.089	0.17	5.4e-06	0.00021	0.058	1
fat	Q9VJW7;Q7KTB0	FBgn0028527	CG18507	34775	FALSE	FALSE	24.73	-0.93	0.036	0.094	0.0011	0.4	0.34	0.46	0.034	0.11	0.08	0.95
fat	Q9VHA8	FBgn0037718	P58IPK	41161	FALSE	FALSE	29.92	-0.46	0.0023	0.012	0.021	-0.14	0.28	0.4	0.1	0.23	0.2	0.44
fat	P12613;A4V391	FBgn0003676	CCT1	42649	FALSE	FALSE	32.19	0.47	3.3e-05	0.0004	0.19	-0.1	0.24	0.35	0.00017	0.0025	0.016	0.97
fat	Q24439;Q8INE6	FBgn0016691	ATPsynO	41845	FALSE	FALSE	34.96	-0.35	8.7e-05	0.00086	0.14	-0.11	0.12	0.21	0.026	0.092	0.022	0.15
fat	Q9VLG9	FBgn0032076	CG9510	3771738	FALSE	FALSE	32.5	-0.17	0.048	0.12	0.00071	0.046	0.57	0.67	0.073	0.18	0.0013	0.14
fat	Q9VWV6	FBgn0022355	Tsf1	32821	TRUE	FALSE	32.62	-0.88	5.6e-08	3.3e-06	0.68	-0.023	0.82	0.87	8.6e-06	0.00029	0.036	1
fat	Q9VB96	FBgn0051075	CG31075	43244	FALSE	TRUE	30.37	0.61	6.4e-06	0.00011	0.32	0.59	8e-06	0.0001	0.94	0.96	0.0084	0.013
fat	Q9VW68	FBgn0036927	Gabat	40188	TRUE	FALSE	31.54	0.41	0.00027	0.0021	0.085	-0.65	1.3e-06	2.7e-05	1.8e-07	2.5e-05	0.034	1
fat	Q9VIH1	FBgn0032906	RPA2	35364	TRUE	FALSE	29.25	0.9	1.1e-05	0.00017	0.28	-0.89	1.2e-05	0.00014	1.1e-07	1.8e-05	0.043	1
fat	Q4QPR8	FBgn0034248	CG14483	36995	FALSE	FALSE	24.38	1.9	0.00044	0.0032	0.066	1.1	0.027	0.063	0.2	0.36	0.21	0.78
fat	Q9VES6	FBgn0038450	CG17560	42022	FALSE	TRUE	32.14	-0.18	0.021	0.063	0.0026	-0.21	0.011	0.03	0.82	0.9	0.27	0.0032
fat	Q9VMQ9	FBgn0000318	cl	43938	FALSE	FALSE	31.47	0.36	0.0033	0.016	0.018	0.61	2.2e-05	0.00022	0.12	0.26	0.4	0.28
fat	Q9VCE0	FBgn0026576	CG5991	42849	FALSE	FALSE	32.48	-0.47	5.6e-05	0.0006	0.17	-0.2	0.039	0.085	0.046	0.14	0.31	0.28
fat	Q9VMR9	FBgn0031700	CG14022	33763	FALSE	FALSE	23.96	-1.7	0.00078	0.0049	0.049	-0.87	0.054	0.11	0.18	0.34	0.14	0.79
fat	Q9W508	FBgn0023550	FarO	45707	FALSE	FALSE	27.99	-0.71	0.00036	0.0027	0.076	-1.1	3.3e-06	5.3e-05	0.13	0.27	0.49	0.55
fat	Q9U9Q1	FBgn0028700	RfC38	34550	TRUE	FALSE	26.28	1.8	3e-05	0.00037	0.21	-0.35	0.28	0.4	0.00018	0.0027	0.06	1
fat	P05389	FBgn0003274	RpLP2	36855	FALSE	FALSE	33.42	0.6	6.1e-05	0.00064	0.17	-0.0027	0.98	0.99	0.0016	0.013	0.089	0.94
fat	Q7K0F7	FBgn0034500	CG11200	37301	FALSE	TRUE	29.86	-0.33	0.00071	0.0046	0.054	-0.46	2.4e-05	0.00023	0.28	0.46	0.17	0.038
fat	Q9XZJ4;E1JGZ9	FBgn0263121	Prosalpha1	246582	FALSE	TRUE	32.79	0.29	0.00088	0.0054	0.047	0.27	0.0015	0.0062	0.87	0.92	0.079	0.0026
fat	Q7K3Z3	FBgn0033179	p47	35674	FALSE	TRUE	30.8	0.32	0.00057	0.0039	0.061	0.38	0.0001	0.00073	0.58	0.73	0.44	0.0099
fat	Q7KU70;Q8IQ70	FBgn0042185	MCU	59223	FALSE	FALSE	26.79	0.79	0.0018	0.0096	0.03	0.13	0.56	0.66	0.043	0.13	0.21	0.85
fat	Q9VMD9;REV__Q7K4B4	FBgn0011722	Tig	33896	FALSE	TRUE	32.58	-0.46	2.5e-05	0.00033	0.23	-0.52	4.9e-06	6.9e-05	0.57	0.72	0.12	0.014
fat	Q9I7L9;Q9Y168	FBgn0042175	CG18858	326109	TRUE	FALSE	31.72	0.47	0.002	0.01	0.029	-0.71	3.7e-05	0.00034	5.3e-06	0.00021	0.01	1
fat	Q9VJZ6	FBgn0032509	CG6523	34745	FALSE	TRUE	31.6	0.2	0.0054	0.023	0.013	0.32	5.9e-05	0.00047	0.16	0.31	0.064	0.013
fat	Q9VSM4	FBgn0017429	CG5989	38984	FALSE	FALSE	25.64	0.36	0.12	0.24	0.00015	-0.23	0.31	0.42	0.075	0.19	0.63	0.79
fat	Q9VDV3	FBgn0038722	Nup58	42342	FALSE	FALSE	26.7	-0.74	3.4e-06	6.6e-05	0.4	-0.46	0.00061	0.003	0.095	0.22	0.073	0.35
fat	A8Y516	FBgn0262124	uex	5740320	FALSE	FALSE	29.46	-0.59	3.9e-07	1.2e-05	0.57	-0.22	0.0088	0.026	0.0029	0.02	0.26	0.61
fat	Q9VEP1	FBgn0038471	CG5220	42056	FALSE	FALSE	24.07	1.3	0.00075	0.0048	0.057	0.93	0.011	0.032	0.39	0.57	0.046	0.56
fat	Q9VJ41	FBgn0053120	CG33120	326260	FALSE	FALSE	29.91	-0.62	3.7e-06	7.1e-05	0.4	-0.34	0.002	0.0077	0.05	0.14	0.01	0.33
fat	Q9VVB4	FBgn0036671	CG9951	39888	FALSE	FALSE	24.2	-2	0.0012	0.0069	0.044	-0.85	0.12	0.2	0.14	0.28	0.44	0.85
fat	Q8T0Q4	FBgn0086656	shrb	35933	FALSE	FALSE	30.55	0.49	0.0029	0.014	0.024	0.74	6.9e-05	0.00054	0.24	0.41	0.022	0.32
fat	Q8IQU1;Q9VW31;Q9VW30;E1JI40	FBgn0261341	verm	40149	FALSE	FALSE	24.88	-1.5	0.024	0.07	0.003	-0.15	0.8	0.86	0.13	0.28	0.028	0.87
fat	Q9VTN9	FBgn0036208	CG10361	39333	FALSE	TRUE	31.01	-0.33	0.0047	0.02	0.017	-0.22	0.046	0.097	0.45	0.62	0.0012	0.068
fat	Q9W334	FBgn0030136	RpS28b	31897	FALSE	TRUE	32.74	-0.67	3.7e-05	0.00044	0.23	-0.77	7.2e-06	9.7e-05	0.58	0.73	0.087	0.091
fat	Q9U5L1	FBgn0010391	Gtp-bp	47251	FALSE	TRUE	30.13	-0.43	3.3e-05	0.0004	0.24	-0.56	1.1e-06	2.3e-05	0.24	0.41	0.37	0.037
fat	Q9VPJ9;Q8IPV3	FBgn0025683	CG3164	33171	FALSE	TRUE	31.45	-0.43	1e-05	0.00016	0.33	-0.41	2.2e-05	0.00022	0.79	0.88	0.083	0.003
fat	Q9VS84	FBgn0052372	ltl	38845	TRUE	FALSE	27.3	-0.9	6.6e-05	0.00068	0.19	0.8	0.00024	0.0014	2e-06	0.00011	0.064	1
fat	Q9W5W8	FBgn0031092	CG9577	33016	FALSE	FALSE	33.93	0.29	0.00024	0.0019	0.12	-0.034	0.6	0.69	0.002	0.015	0.31	0.44
fat	Q8IQU8	FBgn0052214	CG32214	317919	FALSE	FALSE	25.64	-4.4	3.7e-07	1.2e-05	0.6	-4.3	5.7e-07	1.5e-05	0.87	0.92	0.79	0.4
fat	Q9V9M8;B7YZY7	FBgn0032986	CG3262	35452	FALSE	FALSE	26.53	0.7	1.3e-06	3.2e-05	0.5	0.44	0.00027	0.0016	0.08	0.2	0.93	0.28
fat	Q8IPP8	FBgn0051548	CG31548	318794	FALSE	TRUE	32.4	0.21	0.0074	0.029	0.012	0.39	3e-05	0.00028	0.09	0.21	0.08	0.056
fat	Q9VXZ0	FBgn0030605	ND-B18	32434	FALSE	TRUE	29.06	-0.23	0.022	0.065	0.0038	-0.071	0.44	0.55	0.24	0.41	0.039	0.082
fat	Q9VII9	FBgn0051673	CG31673	35348	FALSE	FALSE	31.75	0.15	0.18	0.32	7.6e-05	-0.15	0.19	0.29	0.068	0.17	0.014	0.41
fat	Q9W3Y0	FBgn0029885	CG3224	31600	FALSE	FALSE	26.21	-0.42	0.003	0.015	0.027	-0.74	1e-05	0.00013	0.078	0.19	0.2	0.46
fat	Q9NHA8	FBgn0040321	GNBP3	39020	FALSE	FALSE	25.97	-0.52	0.0077	0.03	0.012	-0.094	0.6	0.69	0.099	0.22	0.11	0.64
fat	Q9VYD5	FBgn0030482	CG1673	32297	FALSE	TRUE	30.26	-0.41	2.9e-05	0.00037	0.26	-0.49	3.2e-06	5.1e-05	0.44	0.62	0.016	0.011
fat	Q9V3X2	FBgn0027865	Tsp96F	43127	FALSE	FALSE	26.17	-0.85	0.00075	0.0048	0.067	-0.11	0.61	0.7	0.022	0.082	0.42	0.9
fat	Q961R9	FBgn0038407	CG6126	41967	FALSE	TRUE	27.61	-0.43	0.00023	0.0019	0.12	-0.52	3.2e-05	0.00029	0.52	0.68	0.55	0.036
fat	Q7K2L7	FBgn0033529	CG17765	36111	FALSE	FALSE	29.02	-0.56	0.0017	0.0092	0.041	-0.41	0.013	0.037	0.51	0.67	0.14	0.19
fat	Q9VM18	FBgn0031908	CG5177	34017	FALSE	TRUE	34.22	-0.7	2.9e-07	1e-05	0.63	-0.57	4e-06	5.9e-05	0.33	0.51	0.46	0.049
fat	Q9VHJ8;Q95U38	FBgn0037643	skap	41067	FALSE	FALSE	35.07	0.3	0.0015	0.0082	0.045	0.66	1.3e-07	4.6e-06	0.0039	0.025	0.013	0.6
fat	Q8SXD5;Q0E8R1	FBgn0043841	vir-1	34652	FALSE	FALSE	28.82	0.33	0.063	0.15	0.00085	-0.11	0.53	0.64	0.08	0.2	0.026	0.66
fat	P29613;P29613-1	FBgn0086355	Tpi	43582	FALSE	FALSE	35.06	-0.089	0.17	0.29	0.00011	0.61	1e-08	6.2e-07	2.3e-07	3e-05	0.0046	1
fat	Q9VZ49	FBgn0030251	CG2145	32027	TRUE	FALSE	30.05	-0.77	2.5e-06	5.3e-05	0.46	0.33	0.0087	0.026	2.1e-06	0.00011	0.079	1
fat	Q8SZW5	FBgn0015571	alpha-Est3	40907	FALSE	FALSE	28.84	-0.42	2.3e-05	0.00031	0.28	0.1	0.17	0.27	8.9e-05	0.0016	0.73	0.95
fat	A1Z6H7	FBgn0266580	Gp210	35512	FALSE	FALSE	29.76	-0.37	0.0002	0.0017	0.13	-0.58	8.8e-07	2.1e-05	0.072	0.18	0.081	0.13
fat	Q9VMD2	FBgn0031818	CG9536	33904	FALSE	FALSE	23.83	-1.5	1.6e-05	0.00023	0.31	-2	2.4e-07	7.3e-06	0.13	0.28	0.58	0.72
fat	Q0E9E2	FBgn0027580	PCB	36020	FALSE	TRUE	37.39	0.28	0.00015	0.0013	0.15	0.35	1.4e-05	0.00015	0.43	0.6	0.2	0.0021
fat	Q8MYV9	FBgn0033308	CG8736	35841	TRUE	FALSE	23.8	-2.5	4.2e-05	0.00048	0.24	-0.18	0.7	0.78	0.0024	0.017	0.61	1
fat	Q2PDW1;Q9VPT9	FBgn0031285	CG3662	33260	TRUE	FALSE	24.89	-1.5	0.00073	0.0047	0.072	0.98	0.017	0.044	0.00017	0.0026	0.032	1
fat	Q9VU70	FBgn0036359	CG14105	39507	FALSE	FALSE	24.4	0.47	0.21	0.35	6.6e-05	1.6	0.00028	0.0016	0.036	0.12	0.03	0.94
fat	Q8IP79;Q8IP80;Q9VK25;Q95SU1	FBgn0032482	Pect	34716	FALSE	FALSE	30.74	-0.18	0.034	0.091	0.0025	0.33	0.00055	0.0028	0.00023	0.0032	0.0077	0.93
fat	Q8IGJ0-1;Q8IGJ0-3;Q8IGJ0	FBgn0086784	stmA	35865	FALSE	FALSE	27.04	-0.71	0.0004	0.003	0.1	-1.5	4.1e-08	1.8e-06	0.0033	0.022	0.052	0.96
fat	Q8IQW2;Q9VWD1	FBgn0031066	COX6B	32989	FALSE	FALSE	32.6	-0.4	0.035	0.093	0.0025	0.39	0.04	0.087	0.0053	0.03	0.0013	0.96
fat	Q7K738	FBgn0026316	Ubc10	37035	TRUE	FALSE	29.59	-0.41	0.0004	0.003	0.1	0.32	0.0033	0.012	3.6e-05	0.00085	0.72	1
fat	Q9V3A8	FBgn0035909	ergic53	44679	FALSE	FALSE	30.69	0.12	0.18	0.31	0.0001	0.22	0.019	0.047	0.41	0.58	0.014	0.031
fat	P48591	FBgn0011703	RnrL	34392	TRUE	FALSE	28.68	2.5	5.6e-05	0.0006	0.23	0.046	0.92	0.95	0.0018	0.014	0.049	1
fat	Q10714	FBgn0012037	Ance	34805	TRUE	FALSE	28.09	-1.2	0.00011	0.0011	0.18	0.23	0.36	0.48	0.00062	0.0064	0.3	1
fat	Q9W1K0	FBgn0034902	CG5532	37761	FALSE	FALSE	27.13	1	0.018	0.057	0.006	-0.12	0.78	0.84	0.056	0.15	0.051	0.92
fat	A8JRC7;Q7YU01;Q7YTZ6;Q9VBN2;A8JRC4;Q86B77;E1JIX9;Q6NP71;Q9VBN0;A8JRD0;A8JRD1;Q9VBN1;A8JRD2;Q6NN57	FBgn0051092	LpR2	43105	FALSE	FALSE	30.25	-0.53	3.9e-05	0.00046	0.26	-0.77	3.6e-07	9.8e-06	0.1	0.23	0.38	0.24
fat	Q9W3T9	FBgn0029925	CG3040	31642	FALSE	FALSE	26.6	-0.8	0.00032	0.0024	0.12	-0.038	0.83	0.88	0.0077	0.039	0.87	0.94
fat	Q9VXE6;A8JV18	FBgn0061200	Nup153	32630	FALSE	FALSE	26.48	0.63	0.00045	0.0032	0.1	0.063	0.67	0.76	0.014	0.058	0.42	0.85
fat	Q03334	FBgn0010265	RpS13	34149	FALSE	FALSE	33.06	-0.41	0.012	0.041	0.0097	-0.6	0.00073	0.0035	0.38	0.55	0.019	0.24
fat	Q9VP13	FBgn0037102	CRIF	40395	FALSE	FALSE	26.57	-0.52	0.0017	0.0091	0.049	-0.34	0.025	0.059	0.39	0.56	0.23	0.21
fat	P12426	FBgn0000109	Aprt	48224	FALSE	FALSE	30.65	0.27	0.039	0.1	0.0024	0.63	5.5e-05	0.00045	0.045	0.13	0.07	0.55
fat	Q9VEK8	FBgn0028992	sds22	42091	FALSE	FALSE	29.23	0.49	0.0015	0.0082	0.055	0.38	0.0092	0.027	0.56	0.71	0.41	0.12
fat	E1JI03;Q9VUH7	FBgn0036449	bmm	39611	FALSE	FALSE	29.15	-0.23	0.054	0.13	0.0015	0.15	0.19	0.29	0.026	0.091	0.069	0.61
fat	Q9VKZ7	FBgn0032217	CG4972	34388	FALSE	TRUE	30.47	-0.44	3.5e-05	0.00042	0.27	-0.42	5.6e-05	0.00046	0.88	0.93	0.41	0.0052
fat	Q9VA73-3	FBgn0028646	aralar1	43616	FALSE	TRUE	35.03	-0.24	0.0001	0.00099	0.2	-0.29	1.1e-05	0.00013	0.45	0.62	0.049	0.00025
fat	Q9V9E3	FBgn0033005	CG3107	35475	FALSE	FALSE	29.82	0.42	8e-06	0.00014	0.4	0.11	0.12	0.2	0.0047	0.028	0.74	0.37
fat	Q8IPE8;Q9V397	FBgn0028479	Mtpalpha	34276	FALSE	TRUE	36.46	0.28	5.3e-05	0.00058	0.25	0.37	1.6e-06	3.2e-05	0.23	0.41	0.34	0.0019
fat	Q9VM11	FBgn0031914	CG5973	34023	FALSE	TRUE	30.24	-0.25	0.018	0.056	0.0071	-0.24	0.018	0.046	0.99	0.99	0.0028	0.01
fat	Q9VGF2	FBgn0037974	CG12224	41453	FALSE	FALSE	27.34	0.56	0.068	0.15	0.0011	0.7	0.025	0.06	0.73	0.84	0.55	0.32
fat	Q9VLN6;Q9VJ21	FBgn0032026	CG7627	34148	FALSE	TRUE	28.33	-0.27	0.011	0.038	0.012	-0.37	0.00096	0.0044	0.45	0.62	0.013	0.044
fat	Q9VM31;Q8IPI3;Q9VM32	FBgn0259111	Ndae1	34005	FALSE	TRUE	27.82	0.39	0.00014	0.0013	0.18	0.48	1.7e-05	0.00018	0.49	0.65	0.77	0.019
fat	Q9V3F3	FBgn0028530	mTTF	34837	FALSE	FALSE	26.21	0.72	0.00091	0.0056	0.077	-0.15	0.4	0.52	0.0031	0.021	0.6	0.97
fat	Q9VWC8	FBgn0031069	Pmp70	32992	FALSE	TRUE	31.97	-0.83	3.5e-09	4.7e-07	0.89	-0.68	6.5e-08	2.5e-06	0.19	0.35	0.38	0.046
fat	P49735	FBgn0014861	Mcm2	40973	TRUE	FALSE	26.16	1.7	7.8e-05	0.00079	0.23	-0.74	0.042	0.091	7e-05	0.0013	0.054	1
fat	Q9VJJ1	FBgn0032595	CG17996	34998	FALSE	FALSE	25.23	-1	0.0044	0.019	0.028	-0.84	0.014	0.038	0.7	0.82	0.16	0.35
fat	Q9W259	FBgn0034723	CG13506	37556	FALSE	FALSE	28.94	0.27	0.042	0.11	0.0025	0.065	0.6	0.7	0.26	0.43	0.01	0.22
fat	P06605;P06603;A4V2J2	FBgn0003885	alphaTub84D	40904	FALSE	TRUE	35.52	0.42	1.2e-05	0.00019	0.38	0.3	0.00048	0.0025	0.24	0.41	0.94	0.021
fat	A1Z739	FBgn0033216	CG1946	35720	FALSE	FALSE	23.43	-0.0091	0.98	0.99	2.8e-11	0.74	0.045	0.095	0.14	0.29	2.2e-07	0.79
fat	Q9VRU1	FBgn0035679	CG10467	38697	FALSE	FALSE	30.43	0.14	0.11	0.22	0.00049	0.49	1.5e-05	0.00017	0.008	0.04	0.086	0.52
fat	A1Z8L8;Q95TS2	FBgn0033635	Prip	36237	TRUE	FALSE	27.39	0.71	0.00049	0.0035	0.11	-0.78	0.00021	0.0013	6.8e-06	0.00025	0.034	1
fat	A1Z9I0	FBgn0033875	CG6357	36532	FALSE	FALSE	27	0.44	0.0053	0.022	0.026	0.77	3.3e-05	0.0003	0.11	0.25	0.042	0.47
fat	Q9VB77	FBgn0039485	CG17189	43263	FALSE	FALSE	26.48	-1.1	0.013	0.044	0.012	-0.059	0.88	0.92	0.081	0.2	0.46	0.89
fat	Q9VDY8	FBgn0262468	vib	42306	FALSE	TRUE	31.89	0.18	0.0069	0.028	0.021	0.37	5.7e-06	7.9e-05	0.03	0.1	0.017	0.048
fat	Q9VZX1	FBgn0035379	spz5	38350	FALSE	FALSE	23.63	0.92	0.015	0.05	0.01	0.17	0.62	0.71	0.14	0.29	0.083	0.79
fat	Q9VHF0;Q7KST5	FBgn0037684	CG8129	41117	FALSE	FALSE	30.82	0.29	0.0062	0.025	0.024	1.5	5.8e-12	2.8e-09	4e-08	9.6e-06	0.14	1
fat	Q9VID7	FBgn0021856	l(2)k14505	35399	FALSE	FALSE	25.8	-1.4	0.017	0.054	0.0092	-0.62	0.24	0.35	0.33	0.51	0.42	0.7
fat	Q9VCH5	FBgn0039120	Nup98-96	42816	FALSE	TRUE	29.18	-0.33	0.00076	0.0048	0.096	-0.43	4.2e-05	0.00037	0.36	0.54	0.09	0.028
fat	Q9V3Y7	FBgn0028526	CG15293	34828	FALSE	FALSE	30.9	-0.44	6.6e-05	0.00069	0.26	-0.21	0.025	0.06	0.068	0.17	0.013	0.18
fat	Q5U191;Q7JQU9	FBgn0033226	CG1882	35733	FALSE	FALSE	30.37	-0.62	3.2e-06	6.4e-05	0.52	-0.2	0.042	0.091	0.0053	0.03	0.53	0.72
fat	Q9V3F8	FBgn0015781	P5cr	42284	FALSE	FALSE	29.13	-0.46	0.00079	0.005	0.095	0.22	0.072	0.14	0.00055	0.0058	0.28	0.97
fat	P07182	FBgn0000359	Cp36	31787	TRUE	FALSE	32.09	1.3	0.025	0.072	0.006	-2.6	0.00011	0.00081	6.2e-05	0.0012	0.74	1
fat	A1ZBU5	FBgn0034511	GNBP-like3	37313	FALSE	FALSE	28.71	0.25	0.13	0.25	0.00042	0.18	0.26	0.38	0.77	0.87	0.0023	0.12
fat	Q9W2N4;E1JGP3;Q9W2N3;E1JGP2;E1JGQ0;E1JGP7;E1JGP4;E1JGP9;E1JGP5;Q058V3;E1JGQ1;E1JGP8;E1JGP6	FBgn0050296	RIC-3	37384	FALSE	FALSE	26.23	-0.57	0.019	0.059	0.0085	-0.37	0.11	0.2	0.53	0.69	0.054	0.33
fat	P11147	FBgn0266599	Hsc70-4	41840	FALSE	TRUE	36.02	0.13	0.023	0.069	0.007	0.27	5.8e-05	0.00046	0.066	0.17	0.06	0.0077
fat	Q9VHY6	FBgn0037530	EMC1	40933	FALSE	TRUE	30.46	-0.46	4.2e-06	7.8e-05	0.5	-0.51	1e-06	2.3e-05	0.61	0.75	0.53	0.0045
fat	Q9VVR9	FBgn0036806	Cyp12c1	40037	FALSE	FALSE	30.2	0.26	0.072	0.16	0.0014	0.45	0.0038	0.013	0.33	0.51	0.011	0.22
fat	B7Z107	FBgn0259722	CG42376	7354420	FALSE	FALSE	26.98	0.31	0.066	0.15	0.0017	-0.083	0.6	0.7	0.096	0.22	0.031	0.59
fat	Q9VKV2	FBgn0032253	LManI	34436	FALSE	FALSE	26.6	0.41	0.061	0.14	0.0019	0.71	0.003	0.011	0.33	0.51	0.015	0.44
fat	Q9V9S8;Q9V9S8-3;Q9V9S8-2	FBgn0266268	FeCH	43757	FALSE	FALSE	32.48	0.35	0.00015	0.0014	0.2	0.14	0.074	0.14	0.056	0.15	0.66	0.11
fat	Q9VE79	FBgn0038611	CG14309	42212	TRUE	FALSE	28.72	0.63	0.028	0.078	0.0059	-1.7	4.3e-06	6.3e-05	6.6e-06	0.00025	0.16	1
fat	P48159	FBgn0010078	RpL23	37628	FALSE	TRUE	32.88	-0.41	8.7e-05	0.00087	0.25	-0.45	3e-05	0.00028	0.73	0.84	0.2	0.009
fat	Q9V9U0	FBgn0003065	CG2150	43745	FALSE	TRUE	32.8	-0.61	1.4e-07	6e-06	0.76	-0.78	3.7e-09	2.8e-07	0.12	0.26	0.36	0.056
fat	Q27331;A4V0N4	FBgn0263598	Vha68-2	45012	FALSE	TRUE	34.73	-0.23	0.002	0.01	0.061	-0.18	0.012	0.033	0.57	0.72	0.35	0.0026
fat	Q9VI09	FBgn0037433	CG17919	40780	FALSE	FALSE	31.22	-0.22	0.035	0.094	0.0044	0.38	0.0008	0.0038	0.00031	0.0039	0.12	0.96
fat	P20351	FBgn0003965	v	32026	FALSE	FALSE	29.6	-0.32	0.00046	0.0033	0.13	-0.035	0.64	0.74	0.015	0.061	0.0083	0.3
fat	Q4AB57;P84051	FBgn0053853	His2A:CG33853	3772139	FALSE	FALSE	30.2	1.1	0.00062	0.0041	0.12	1.4	8e-05	0.00061	0.51	0.67	0.032	0.41
fat	Q9V771	FBgn0033978	Cyp6a23	36661	FALSE	FALSE	29.37	-0.33	0.00092	0.0056	0.096	-7e-05	1	1	0.012	0.052	0.0049	0.45
fat	Q9VK69	FBgn0032444	CCT4	34674	TRUE	FALSE	31.83	0.67	8.3e-05	0.00084	0.26	-0.33	0.023	0.055	4.7e-05	0.001	0.044	1
fat	Q8INU6	FBgn0051674	CG31674	318878	FALSE	FALSE	27.47	-0.46	0.0059	0.024	0.029	-0.28	0.077	0.15	0.39	0.56	0.11	0.23
fat	Q9Y0Y5	FBgn0027496	epsilonCOP	33908	FALSE	TRUE	28.27	-0.49	3e-05	0.00037	0.35	-0.46	6.1e-05	0.00049	0.81	0.89	0.65	0.011
fat	Q9VD09	FBgn0038966	pinta	42635	FALSE	TRUE	29.58	-0.41	8.4e-05	0.00084	0.26	-0.3	0.0017	0.007	0.34	0.52	0.032	0.03
fat	Q9VL78	FBgn0029174	FKBP59	47762	FALSE	TRUE	32.43	0.23	0.0054	0.023	0.032	0.18	0.022	0.054	0.65	0.78	0.47	0.0053
fat	Q9VFM0	FBgn0038211	CG9649	41727	FALSE	FALSE	26.41	-0.88	0.00011	0.001	0.24	-0.56	0.0052	0.017	0.23	0.4	0.16	0.46
fat	Q8MSI2	FBgn0020908	Scp1	3355102	TRUE	FALSE	33.24	-0.83	0.00078	0.0049	0.11	0.65	0.0052	0.017	7.6e-05	0.0014	0.0015	1
fat	Q9VG08	FBgn0038105	yellow-f2	41596	FALSE	FALSE	28.07	-0.73	0.00011	0.001	0.25	-0.27	0.08	0.15	0.042	0.13	0.32	0.71
fat	Q9VNE9	FBgn0037351	RpL13A	40687	FALSE	FALSE	32.96	0.39	0.00025	0.002	0.18	0.19	0.046	0.098	0.1	0.23	0.18	0.15
fat	Q9VDL7;Q8IN53	FBgn0067783	DPCoAC	42429	FALSE	TRUE	29.81	0.47	3e-05	0.00037	0.36	0.32	0.0014	0.0059	0.22	0.4	0.26	0.068
fat	Q9VRZ1;Q967S0	FBgn0041194	Prat2	38753	FALSE	FALSE	33.12	-0.41	0.0024	0.012	0.061	-0.04	0.74	0.81	0.036	0.12	0.21	0.58
fat	E2QCY2;Q9VVT8	FBgn0036821	CG3961	40056	FALSE	FALSE	30.71	-0.25	0.0038	0.017	0.045	-0.48	6.3e-06	8.6e-05	0.048	0.14	0.023	0.16
fat	O18336;Q86BK7;Q86BK8	FBgn0015791	Rab14	34840	FALSE	FALSE	28.77	-0.15	0.042	0.11	0.0041	-0.0025	0.97	0.98	0.15	0.3	6e-05	0.036
fat	Q9W0L6	FBgn0035173	CG13907	38104	FALSE	FALSE	27.46	0.53	0.0032	0.015	0.051	-0.019	0.91	0.93	0.023	0.083	0.13	0.82
fat	Q9XZ14	FBgn0027528	goe	32660	FALSE	TRUE	29.54	-0.6	1.4e-06	3.4e-05	0.63	-0.48	2.1e-05	0.00021	0.34	0.52	0.023	0.039
fat	P56079	FBgn0010350	CdsA	43950	FALSE	FALSE	28.78	-0.81	0.00043	0.0031	0.15	-0.13	0.5	0.61	0.019	0.075	0.096	0.89
fat	Q9VXQ0	FBgn0030686	mRpL3	32523	FALSE	FALSE	28.37	-0.29	0.00065	0.0043	0.13	-0.5	1.3e-06	2.7e-05	0.046	0.14	0.019	0.1
fat	Q9VEE9	FBgn0038552	Alg1	42146	FALSE	FALSE	29.28	-0.41	0.00035	0.0027	0.17	-0.22	0.031	0.07	0.16	0.31	0.42	0.14
fat	Q9W332	FBgn0052702	Cubn	326235	FALSE	TRUE	31.03	-0.41	2.8e-05	0.00035	0.38	-0.56	5e-07	1.3e-05	0.16	0.31	0.3	0.044
fat	Q9VC10	FBgn0265190	PIG-S	42979	TRUE	FALSE	24.29	1.2	2.8e-06	5.6e-05	0.58	-0.54	0.0076	0.023	2.1e-06	0.00011	0.22	1
fat	Q9VY05	FBgn0030593	CG9512	32419	FALSE	FALSE	33.37	0.31	0.031	0.086	0.0065	0.48	0.0019	0.0075	0.37	0.54	0.61	0.19
fat	A1Z6H0	FBgn0033032	kune	35504	TRUE	FALSE	24.65	-2.4	1.4e-05	0.00022	0.44	0.31	0.45	0.56	0.00017	0.0026	0.68	1
fat	Q9VAD4	FBgn0039726	eIF2Balpha	43549	FALSE	FALSE	27.93	0.65	0.00024	0.0019	0.2	0.0053	0.97	0.98	0.0048	0.028	0.91	0.93
fat	Q9VBS0	FBgn0039328	CHKov2	43068	FALSE	FALSE	26.69	-0.6	0.0065	0.026	0.032	-0.47	0.027	0.063	0.64	0.77	0.054	0.23
fat	Q9VB64	FBgn0261995	CG42813	43276	FALSE	FALSE	31.31	0.26	0.0094	0.034	0.024	0.53	1e-05	0.00013	0.038	0.12	0.12	0.31
fat	Q9W306	FBgn0030160	CG9691	31923	FALSE	FALSE	27.41	0.5	0.025	0.072	0.0089	0.68	0.0036	0.013	0.53	0.69	0.013	0.29
fat	Q24154	FBgn0016726	RpL29	37430	FALSE	FALSE	28.26	1.6	0.00065	0.0043	0.13	1.3	0.0036	0.013	0.59	0.74	0.085	0.47
fat	A0AQH0	FBgn0010590	Prosbeta1	46058	TRUE	FALSE	31.87	0.46	0.00036	0.0027	0.17	-0.32	0.0063	0.02	5.2e-05	0.0011	0.36	1
fat	P08736	FBgn0000556	eEF1alpha1	36271	FALSE	TRUE	36.79	0.26	0.00074	0.0047	0.13	0.33	7.4e-05	0.00057	0.46	0.63	0.015	0.0038
fat	P29310-3	FBgn0004907	14-3-3zeta	36059	FALSE	FALSE	26.8	-4.4	0.0031	0.015	0.056	-0.52	0.69	0.77	0.047	0.14	0.051	0.97
fat	Q9VRV7	FBgn0035692	Sf3b6	38720	FALSE	FALSE	23.78	-0.5	0.007	0.028	0.031	-0.64	0.0011	0.0051	0.57	0.72	0.33	0.19
fat	Q9VND8	FBgn0041191	Rheb	117332	FALSE	FALSE	28.77	0.39	0.0086	0.032	0.026	0.21	0.13	0.22	0.34	0.52	0.0091	0.21
fat	Q9VFX6	FBgn0038129	TBC1D5	41628	FALSE	FALSE	26.18	0.33	0.027	0.077	0.0081	0.75	3.3e-05	0.0003	0.041	0.13	0.18	0.67
fat	Q24117;O96860	FBgn0011760	ctp	31405	FALSE	FALSE	29.45	-0.3	0.036	0.094	0.0059	-0.0069	0.96	0.97	0.13	0.28	0.052	0.41
fat	Q9VIG1	FBgn0032915	l(2)05287	35374	FALSE	FALSE	25.91	-0.82	0.04	0.1	0.0051	-2.5	2.2e-06	4e-05	0.0042	0.026	0.0022	0.99
fat	Q95SE8;Q9VU19	FBgn0036318	Wbp2	39460	FALSE	FALSE	25.11	1.4	0.1	0.2	0.0012	-0.83	0.33	0.45	0.069	0.18	0.01	0.94
fat	Q06943	FBgn0010228	HmgZ	37480	FALSE	FALSE	30.48	-1	5e-05	0.00055	0.33	-0.19	0.33	0.44	0.0071	0.037	0.062	0.95
fat	Q59E58;Q59E59	FBgn0265434	zip	38001	FALSE	FALSE	32.97	0.22	0.00092	0.0056	0.11	-0.05	0.38	0.5	0.0029	0.02	0.86	0.19
fat	Q9W1X5	FBgn0034797	nahoda	37641	FALSE	TRUE	29.32	-0.84	9.4e-06	0.00015	0.48	-0.9	3.8e-06	5.7e-05	0.74	0.85	0.25	0.084
fat	Q9VCC3	FBgn0039159	mRpS24	42870	FALSE	FALSE	23.56	-1.5	0.0012	0.0069	0.1	-0.46	0.25	0.36	0.076	0.19	0.48	0.89
fat	Q7JVG6	FBgn0033225	TTLL12	35732	FALSE	FALSE	27.91	0.51	0.00099	0.0059	0.11	0.16	0.22	0.33	0.076	0.19	0.53	0.51
fat	P48461	FBgn0003134	Pp1alpha-96A	42922	FALSE	FALSE	31.23	0.29	0.071	0.16	0.0024	0.081	0.6	0.7	0.34	0.52	0.0022	0.27
fat	Q9VMQ5	FBgn0031713	CG7277	33777	TRUE	FALSE	27.24	0.76	0.00022	0.0018	0.22	-0.26	0.13	0.21	0.00036	0.0042	0.94	1
fat	Q9W1B9	FBgn0034968	RpL12	45329	FALSE	TRUE	33.28	-0.39	0.00067	0.0044	0.14	-0.32	0.0031	0.011	0.63	0.77	0.077	0.026
fat	Q95RR1	FBgn0052446	Atox1	326216	FALSE	FALSE	29.16	0.28	0.047	0.12	0.0044	0.7	5.3e-05	0.00044	0.038	0.12	0.026	0.66
fat	Q9VMK3	FBgn0086265	psd	33830	TRUE	FALSE	27.81	2.3	5.1e-05	0.00056	0.35	-0.45	0.3	0.42	0.00029	0.0037	1	1
fat	Q9VZG2	FBgn0035510	Cpr64Aa	38508	FALSE	FALSE	31.56	0.96	8.5e-08	4.4e-06	0.83	0.77	1.7e-06	3.3e-05	0.25	0.42	0.66	0.17
fat	Q9VAM6	FBgn0062442	Cisd2	43459	FALSE	TRUE	32.08	0.23	0.028	0.078	0.0092	0.28	0.009	0.027	0.71	0.83	0.037	0.025
fat	Q9VK12	FBgn0032494	CG5945	34729	FALSE	FALSE	31.8	-0.25	0.031	0.084	0.0082	-0.4	0.0017	0.0069	0.35	0.53	0.059	0.11
fat	Q9VA93;A8JRG9	FBgn0039755	CG15531	43592	FALSE	TRUE	32.09	-0.31	0.0034	0.016	0.059	-0.22	0.028	0.065	0.49	0.66	0.28	0.032
fat	P20232	FBgn0010422	TfIIS	34883	FALSE	FALSE	26.52	0.9	0.00013	0.0012	0.27	0.3	0.12	0.21	0.034	0.11	0.77	0.83
fat	Q24498-5;Q24498-4;Q24498-3;Q24498	FBgn0011286	RyR	49090	FALSE	TRUE	30.64	-0.36	5e-06	9.1e-05	0.56	-0.35	7.6e-06	0.0001	0.89	0.93	0.52	0.0003
fat	Q9V4C1;Q1RKY9	FBgn0039897	CG1674	43780	FALSE	FALSE	31.66	-0.58	1.4e-06	3.4e-05	0.67	-0.27	0.0043	0.014	0.014	0.059	0.43	0.4
fat	Q9VR35;E1JHT5	FBgn0031637	mxt	33686	FALSE	FALSE	27.3	-1	0.00038	0.0028	0.19	-0.46	0.059	0.12	0.11	0.25	0.26	0.73
fat	Q9VSY6	FBgn0023129	aay	39085	FALSE	FALSE	28.72	-0.11	0.41	0.56	3.1e-05	0.75	2.9e-05	0.00028	0.00026	0.0035	0.0052	0.99
fat	Q9VK39	FBgn0032472	CG9928	34704	FALSE	FALSE	30.01	-0.28	0.011	0.04	0.025	-0.092	0.37	0.49	0.2	0.36	0.0092	0.15
fat	Q8MR45-2;Q8MR45	FBgn0033431	CG1827	35989	FALSE	FALSE	25.11	0.28	0.037	0.097	0.0071	1.2	2.3e-08	1.1e-06	7.4e-05	0.0014	0.16	1
fat	Q24214;P48451	FBgn0015614	CanB2	46456	FALSE	FALSE	29.29	0.31	0.0075	0.029	0.036	0.017	0.87	0.91	0.059	0.16	0.15	0.36
fat	Q9VCI3-3;Q9VCI3-2	FBgn0039114	Lsd-1	42810	TRUE	FALSE	29.92	-0.54	0.0082	0.031	0.033	0.71	0.001	0.0046	0.00013	0.0021	0.11	1
fat	Q9VZL3	FBgn0035471	Sc2	38457	FALSE	TRUE	32.59	-0.28	0.00096	0.0058	0.13	-0.13	0.098	0.18	0.14	0.28	0.29	0.045
fat	Q9VQC4	FBgn0031428	CG9886	33431	FALSE	FALSE	30.79	0.24	0.044	0.11	0.0058	0.58	4.9e-05	0.00041	0.039	0.12	0.036	0.51
fat	Q9W3U0	FBgn0029924	CG4586	31641	TRUE	FALSE	25.61	2.3	0.0001	0.00097	0.3	-0.75	0.13	0.22	0.00021	0.003	0.11	1
fat	Q9VK99	FBgn0032422	atilla	34647	FALSE	FALSE	28.41	0.25	0.33	0.49	7.2e-05	0.69	0.014	0.039	0.24	0.41	0.0095	0.61
fat	Q9VNI3	FBgn0037377	CG1218	40718	FALSE	FALSE	26.85	0.86	2.3e-05	0.00031	0.44	0.056	0.72	0.8	0.0015	0.012	0.21	0.98
fat	Q9VVV6;Q9VVV5;Q86BJ0;Q86BI9	FBgn0036837	CG18135	40073	TRUE	FALSE	30.19	-0.4	0.0084	0.031	0.034	0.98	9.8e-07	2.2e-05	1.1e-06	7.3e-05	0.01	1
fat	Q9VCA9	FBgn0039172	Spase22-23	42885	FALSE	FALSE	27.84	-0.37	0.014	0.046	0.022	0.23	0.11	0.19	0.0059	0.032	0.41	0.9
fat	Q8MLN7	FBgn0050163	Cpr60D	246492	FALSE	FALSE	28.22	-0.69	0.0035	0.017	0.063	-0.86	0.00056	0.0029	0.56	0.72	0.025	0.28
fat	Q8I0J3	FBgn0044511	mRpS21	318249	FALSE	TRUE	25.53	-0.53	0.00025	0.002	0.23	-0.56	0.00016	0.001	0.88	0.93	0.76	0.036
fat	Q0E940;E2QCG7	FBgn0034237	eIF3b	36981	FALSE	TRUE	31.92	-0.17	0.012	0.042	0.025	-0.14	0.035	0.077	0.73	0.84	0.082	0.0012
fat	Q8IP88	FBgn0051862	CG31862	318989	TRUE	FALSE	24.45	-4.6	6.4e-08	3.7e-06	0.86	0.76	0.16	0.26	9.8e-07	7e-05	0.92	1
fat	P91891	FBgn0017572	Mo25	39858	FALSE	TRUE	30.75	-0.25	0.0025	0.012	0.081	-0.11	0.13	0.22	0.19	0.35	0.35	0.026
fat	P05661-12	FBgn0264695	Mhc	35007	FALSE	FALSE	31.03	-1	9.2e-05	0.0009	0.32	-0.51	0.023	0.056	0.088	0.21	0.37	0.73
fat	Q7K550	FBgn0027619	eIF3j	36037	FALSE	FALSE	31.39	-0.23	0.009	0.033	0.033	0.22	0.011	0.031	0.00072	0.0072	0.07	0.84
fat	P18171;P18170	FBgn0000427	2018-12-01	31691	TRUE	FALSE	30.51	2.9	0.00055	0.0038	0.17	-0.93	0.2	0.3	0.001	0.0092	0.76	1
fat	Q9NIV1	FBgn0037327	PEK	40653	FALSE	FALSE	25.92	-2.8	0.0027	0.013	0.077	-0.1	0.9	0.93	0.029	0.1	0.032	0.97
fat	P05031-2;P05031-3;P05031	FBgn0000422	Ddc	35190	FALSE	FALSE	28.83	-0.29	0.0081	0.031	0.036	0.094	0.35	0.47	0.012	0.054	0.12	0.63
fat	Q7JWP9	FBgn0034717	CG5819	37547	FALSE	TRUE	28.98	0.56	2.5e-05	0.00033	0.44	0.57	2.4e-05	0.00023	0.98	0.99	0.18	0.014
fat	Q9VYV3	FBgn0030329	prtp	32124	FALSE	TRUE	30.98	-0.26	0.0023	0.012	0.085	-0.09	0.24	0.35	0.11	0.25	0.16	0.067
fat	Q9W1V8	FBgn0010622	DCTN3-p24	46074	FALSE	FALSE	28.27	-0.52	0.0031	0.015	0.072	-0.086	0.57	0.68	0.059	0.16	0.17	0.66
fat	Q9VDT1	FBgn0038742	Arc42	42364	FALSE	FALSE	32.28	0.42	0.00021	0.0018	0.25	0.15	0.11	0.19	0.052	0.15	0.27	0.28
fat	Q6IKC0	FBgn0259740	CG42394	7354424	FALSE	FALSE	25.17	-0.35	0.036	0.094	0.0083	0.46	0.008	0.024	0.0016	0.013	0.036	0.98
fat	Q9VNR7;A8E6R2	FBgn0037186	CG11241	40492	TRUE	FALSE	28.92	-0.6	9.7e-06	0.00016	0.53	0.15	0.16	0.25	4.5e-05	0.001	0.44	1
fat	P92177	FBgn0020238	14-3-3epsilon	42186	FALSE	TRUE	34.69	0.31	5.3e-05	0.00057	0.38	0.098	0.11	0.2	0.02	0.075	0.26	0.067
fat	Q9V9U4	FBgn0261479	nero	43740	FALSE	FALSE	28.3	-0.49	0.0006	0.0041	0.17	-0.21	0.097	0.18	0.1	0.23	0.018	0.37
fat	Q95RS6	FBgn0058160	CG40160	3354965	TRUE	FALSE	26.64	-1	2.6e-06	5.4e-05	0.64	0.28	0.085	0.16	1e-05	0.00033	0.38	1
fat	Q9VB02	FBgn0039543	CG12428	43332	FALSE	TRUE	30.14	-0.47	2.4e-05	0.00032	0.45	-0.55	3.9e-06	5.8e-05	0.52	0.68	0.11	0.02
fat	Q9VT21	FBgn0036020	CG8336	39121	FALSE	FALSE	25.59	-0.69	0.002	0.01	0.094	-1.1	3e-05	0.00028	0.19	0.35	0.7	0.55
fat	Q9VYE6	FBgn0266375	IP3K2	32285	FALSE	FALSE	25.03	-0.47	0.0057	0.024	0.048	-0.3	0.062	0.12	0.43	0.6	0.031	0.21
fat	Q9VWD9	FBgn0031057	Ubqn	32977	FALSE	FALSE	30.19	-0.27	0.015	0.048	0.022	0.36	0.002	0.0078	0.00031	0.0039	0.0055	0.97
fat	Q01603;E1JIN0	FBgn0004577	Pxd	2768671	FALSE	FALSE	30.47	0.42	1.7e-05	0.00024	0.48	-0.18	0.019	0.049	1.3e-05	0.0004	0.25	0.99
fat	Q9VY91	FBgn0030520	Pdcd4	32337	FALSE	FALSE	28.52	0.55	0.00082	0.0052	0.15	-0.064	0.65	0.74	0.0053	0.03	0.1	0.91
fat	Q9VWD0	FBgn0052528	parvin	32990	FALSE	FALSE	30.17	-0.28	0.02	0.062	0.016	0.019	0.86	0.91	0.07	0.18	0.14	0.38
fat	Q9VH09	FBgn0037801	CG3999	41253	FALSE	FALSE	33.69	0.23	0.00076	0.0048	0.16	0.88	7.2e-12	3.1e-09	1.6e-07	2.2e-05	0.37	1
fat	Q0E9A5	FBgn0033757	muskelin	36386	FALSE	FALSE	24.94	1.7	0.0026	0.013	0.083	-0.25	0.6	0.7	0.011	0.049	0.032	0.98
fat	Q9W4C2	FBgn0029765	CG16756	31460	FALSE	TRUE	25.28	-0.37	0.0049	0.021	0.055	-0.27	0.029	0.067	0.56	0.71	0.036	0.073
fat	P82147;P82147-2	FBgn0011296	l(2)efl	37744	FALSE	FALSE	32.87	0.23	0.0041	0.018	0.062	0.49	1.7e-06	3.3e-05	0.017	0.068	0.48	0.21
fat	O77277	FBgn0025615	Torsin	31399	FALSE	FALSE	28.45	0.29	0.0097	0.035	0.033	0.084	0.41	0.53	0.16	0.32	0.72	0.18
fat	Q9W3C1	FBgn0027330	l(1)G0020	31811	FALSE	FALSE	27.5	-1	0.0023	0.012	0.091	-0.97	0.0039	0.013	0.86	0.92	0.014	0.26
fat	Q9VGZ2	FBgn0037815	Rrp46	41270	FALSE	FALSE	27.65	-0.68	0.00087	0.0054	0.15	-0.76	0.00029	0.0017	0.73	0.84	0.081	0.15
fat	Q0KIA8;Q9VI16;Q9VEM4	FBgn0037440	CRAT	40787	FALSE	TRUE	31.06	0.18	0.025	0.072	0.014	0.11	0.16	0.26	0.5	0.66	0.024	0.011
fat	Q9W265	FBgn0017482	T3dh	37551	FALSE	TRUE	30.14	-0.32	0.0021	0.011	0.096	-0.35	0.0011	0.0048	0.83	0.9	0.15	0.012
fat	Q9VN86	FBgn0037298	CG2604	40623	FALSE	TRUE	32.01	-0.17	0.028	0.078	0.012	-0.26	0.0016	0.0067	0.36	0.54	0.088	0.012
fat	Q7KLX3	FBgn0021795	Tapdelta	45680	FALSE	TRUE	31.49	-0.31	0.0039	0.018	0.066	-0.26	0.014	0.037	0.69	0.81	0.15	0.024
fat	Q9VLT5;Q9VLT5-2	FBgn0011230	poe	46243	FALSE	TRUE	29.73	-0.21	0.018	0.056	0.02	-0.19	0.033	0.074	0.83	0.9	0.39	0.0061
fat	A1Z7H7	FBgn0033320	CG8586	35854	FALSE	FALSE	28.85	-0.38	0.00061	0.0041	0.18	0.15	0.12	0.21	0.00072	0.0072	0.17	0.92
fat	Q7JZK1	FBgn0033570	ND-B14	36159	FALSE	FALSE	30.83	0.17	0.086	0.18	0.0026	0.76	2.1e-07	6.4e-06	0.00029	0.0037	0.011	0.96
fat	Q9VGU6;REV__Q9VZS5;REV__D1Z3A1;REV__D1Z3A1	FBgn0042094	Adk3	41318	FALSE	TRUE	30.38	0.49	0.00017	0.0015	0.29	0.47	0.00022	0.0014	0.93	0.96	0.41	0.018
fat	P12982;Q05547;Q9VQL9	FBgn0004103	Pp1-87B	49260	FALSE	FALSE	27.24	0.52	0.085	0.18	0.0028	0.019	0.95	0.96	0.23	0.4	0.0094	0.65
fat	Q7K110	FBgn0034277	OstDelta	37029	FALSE	TRUE	31.36	-0.41	6.5e-05	0.00068	0.38	-0.23	0.0089	0.026	0.13	0.27	0.44	0.079
fat	Q9VTC8	FBgn0036110	Cpr67Fb	39225	FALSE	FALSE	24.07	1.1	0.011	0.039	0.032	0.86	0.042	0.09	0.66	0.78	0.19	0.44
fat	P49630	FBgn0002579	RpL36	31009	FALSE	FALSE	32.56	-0.57	0.00085	0.0053	0.16	-0.87	8.3e-06	0.00011	0.14	0.29	0.075	0.44
fat	B7Z0L1;Q9VES3;P10674;Q8INA9;A8JR25;B7Z0L0	FBgn0262742	Fas1	42025	FALSE	FALSE	28.76	0.5	9.7e-05	0.00094	0.34	0.091	0.38	0.5	0.0096	0.045	0.6	0.69
fat	Q9U3Z7	FBgn0015393	hoip	44173	FALSE	FALSE	32.14	-0.3	0.009	0.033	0.039	-0.71	2.6e-06	4.4e-05	0.014	0.058	0.0023	0.66
fat	Q9VY93	FBgn0030518	CG11134	32334	FALSE	FALSE	30.45	-0.17	0.084	0.18	0.0029	0.62	3.8e-06	5.7e-05	1.3e-05	0.0004	0.023	1
fat	Q3ZAP4;Q8MTZ6;A8JQX3	FBgn0261808	cu	41339	FALSE	FALSE	27.39	-0.5	0.017	0.055	0.022	-0.25	0.21	0.32	0.36	0.54	0.036	0.37
fat	Q6AWN0	FBgn0052068	Adi1	326189	FALSE	FALSE	32.61	0.15	0.023	0.068	0.017	0.7	1.5e-09	1.4e-07	6.8e-06	0.00025	0.05	0.99
fat	Q9V6U9	FBgn0033883	CG16935	36540	FALSE	TRUE	32.53	0.31	0.00053	0.0036	0.2	0.27	0.0017	0.0069	0.71	0.83	0.46	0.0051
fat	Q7K566	FBgn0036199	Bmcp	39322	FALSE	FALSE	26.77	-0.54	0.0046	0.02	0.065	-0.15	0.37	0.49	0.12	0.25	0.093	0.58
fat	Q9XZL8	FBgn0086370	sra	47384	FALSE	FALSE	26.79	0.65	0.02	0.062	0.019	0.52	0.058	0.12	0.71	0.83	0.11	0.29
fat	Q9VD29;Q95SY7	FBgn0038947	Sar1	42615	FALSE	TRUE	31.97	-0.17	0.03	0.084	0.013	-0.2	0.013	0.037	0.78	0.88	0.0094	0.0036
fat	Q9VGC3	FBgn0037998	Cog1	41479	FALSE	FALSE	23.81	-1.6	4.9e-06	8.8e-05	0.62	-0.52	0.054	0.11	0.0061	0.033	0.4	0.98
fat	Q9W266	FBgn0034718	wdp	37548	FALSE	FALSE	30.28	-0.38	0.0002	0.0017	0.28	-0.11	0.19	0.3	0.031	0.1	0.089	0.28
fat	Q9VVW8	FBgn0036848	CG10424	40085	FALSE	FALSE	30.22	0.21	0.098	0.2	0.0024	0.038	0.75	0.82	0.33	0.51	0.083	0.16
fat	Q86BM5	FBgn0027932	Akap200	34170	FALSE	TRUE	32.39	0.61	6e-05	0.00064	0.4	0.63	4.2e-05	0.00037	0.9	0.94	0.16	0.035
fat	Q9VCR9	FBgn0039043	CG17121	42721	FALSE	FALSE	29.13	0.28	0.0087	0.032	0.043	-0.23	0.024	0.058	0.0013	0.011	0.2	0.89
fat	Q9W596	FBgn0259108	futsch	5740544	FALSE	TRUE	27.71	-0.38	0.0057	0.024	0.059	-0.38	0.005	0.017	0.97	0.98	0.38	0.033
fat	Q9VH77	FBgn0037744	CG8417	41192	FALSE	FALSE	31.03	-0.22	0.0072	0.028	0.05	0.25	0.0035	0.012	0.00027	0.0036	0.081	0.89
fat	Q9VGA1	FBgn0042206	GstD10	59240	FALSE	FALSE	28.6	0.56	0.0017	0.0095	0.12	1.4	3.5e-08	1.6e-06	0.00098	0.0089	0.6	0.99
fat	Q9VNC1	FBgn0037330	mRpL44	40656	TRUE	FALSE	28.66	0.29	0.00095	0.0057	0.17	-0.43	1.3e-05	0.00014	1.6e-06	0.0001	0.067	1
fat	Q9VAN7;Q9VGB6	FBgn0014869	Pglym78	43447	TRUE	FALSE	34.23	-0.18	0.019	0.059	0.022	0.55	4.2e-07	1.1e-05	9.7e-07	7e-05	0.02	1
fat	Q9VTC3	FBgn0036106	CG6409	39220	FALSE	FALSE	33.08	-0.51	0.0004	0.003	0.24	-0.14	0.24	0.35	0.041	0.13	0.42	0.57
fat	O97477	FBgn0025885	Inos	35671	FALSE	FALSE	31.88	-0.14	0.067	0.15	0.0052	0.074	0.32	0.44	0.051	0.15	0.085	0.12
fat	Q8I0G5-2	FBgn0028968	gammaCOP	43717	FALSE	FALSE	30.8	-0.4	0.00043	0.0031	0.24	-0.66	1.3e-06	2.7e-05	0.061	0.16	0.57	0.28
fat	Q9VSN2;Q86BH6	FBgn0035917	Zasp66	38988	FALSE	FALSE	30.43	-0.31	0.0056	0.023	0.065	0.033	0.74	0.81	0.024	0.087	0.19	0.5
fat	Q9GPJ1;Q9VGY6;Q9VGY6-2;Q9GPJ1-2	FBgn0262717	Skeletor	3772559	FALSE	FALSE	28.88	0.89	2.3e-05	0.00031	0.51	0.65	0.00062	0.0031	0.29	0.47	0.28	0.33
fat	P61849	FBgn0011581	Ms	44324	FALSE	FALSE	28.83	-0.62	0.013	0.044	0.035	-0.35	0.13	0.22	0.41	0.58	0.44	0.41
fat	Q9W0X5;A8DYP4	FBgn0035087	CG2765	37994	FALSE	FALSE	29.54	-0.32	0.0048	0.021	0.072	0.079	0.44	0.55	0.011	0.049	0.066	0.66
fat	Q9VQD7	FBgn0031436	ND-B17.2	33443	FALSE	FALSE	31.42	-0.28	0.017	0.054	0.027	-0.049	0.65	0.74	0.14	0.29	0.041	0.24
fat	Q7JYX5	FBgn0266186	Vamp7	36015	FALSE	FALSE	26.8	-0.54	0.0016	0.009	0.13	-0.27	0.075	0.14	0.21	0.38	0.17	0.35
fat	A1Z979;Q4V4H7	FBgn0033789	CG13324	36434	FALSE	FALSE	24.32	-0.34	0.62	0.74	6.8e-06	-3	0.00029	0.0017	0.011	0.051	0.0013	0.99
fat	Q9XZ68	FBgn0028970	betaggt-II	47757	FALSE	FALSE	25.44	0.36	0.045	0.11	0.0095	0.19	0.26	0.37	0.49	0.65	0.14	0.23
fat	Q9V3J4	FBgn0024509	Sec13	44437	FALSE	FALSE	30.12	-0.59	1.7e-06	3.8e-05	0.73	-0.2	0.029	0.066	0.0042	0.026	0.3	0.67
fat	O01666	FBgn0020235	ATPsyngamma	43507	FALSE	TRUE	34.9	0.21	0.0025	0.012	0.11	0.1	0.1	0.18	0.22	0.39	0.15	0.0053
fat	Q9VSN3	FBgn0052029	Cpr66D	38990	FALSE	FALSE	26.29	-0.61	0.0023	0.012	0.12	-1.4	1.8e-07	5.7e-06	0.0038	0.024	0.58	0.96
fat	P53034	FBgn0260985	RfC4	38492	TRUE	FALSE	26.11	1.8	0.00046	0.0033	0.24	-1.8	0.00034	0.0019	8.9e-06	0.0003	0.022	1
fat	Q9VXJ0	FBgn0030731	Mfe2	32582	FALSE	TRUE	33.93	-0.24	0.0011	0.0065	0.17	-0.22	0.0027	0.0099	0.78	0.87	0.21	0.0011
fat	Q9VFV8	FBgn0038146	CG9799	41647	FALSE	FALSE	23.79	-1.4	0.059	0.14	0.0069	-2.8	0.0007	0.0034	0.16	0.31	0.0076	0.86
fat	Q8IN44	FBgn0028396	TotA	44121	TRUE	FALSE	29	-0.64	0.0077	0.03	0.055	0.62	0.0098	0.029	0.0006	0.0062	0.0016	1
fat	Q9VK60	FBgn0032453	CG6180	34683	FALSE	FALSE	32.76	0.46	0.00063	0.0042	0.22	0.62	3e-05	0.00028	0.33	0.51	0.93	0.13
fat	P47938	FBgn0011761	dhd	31444	TRUE	FALSE	29.96	1.5	0.00011	0.0011	0.37	-0.44	0.16	0.26	0.00028	0.0036	0.13	1
fat	Q8INZ8;Q8SX47	FBgn0051809	CG31809	318954	FALSE	FALSE	23.56	-2.3	0.00046	0.0033	0.24	-0.15	0.79	0.85	0.011	0.05	0.83	0.99
fat	Q9V428	FBgn0028546	ics	34774	FALSE	TRUE	30.43	-0.38	0.00095	0.0057	0.18	-0.26	0.016	0.042	0.37	0.55	0.29	0.065
fat	Q9I7S2	FBgn0030511	CG11158	32327	FALSE	FALSE	24.07	-1.4	0.0026	0.013	0.11	-1.7	0.00041	0.0022	0.56	0.72	0.23	0.49
fat	Q9V3I2	FBgn0014010	Rab5	33418	FALSE	FALSE	30.61	0.24	0.0089	0.033	0.051	-0.11	0.19	0.29	0.007	0.037	0.018	0.55
fat	Q9VAD0;Q8I0P9	FBgn0000032	Acph-1	48445	FALSE	FALSE	28.63	-0.41	0.0039	0.018	0.091	-0.74	1.2e-05	0.00014	0.073	0.18	0.092	0.47
fat	P06606	FBgn0087040	alphaTub67C	39130	TRUE	FALSE	29.27	1.9	0.00042	0.0031	0.26	-0.76	0.1	0.19	0.00048	0.0053	0.14	1
fat	Q9XYM5;Q5BIG7;Q7KNF5;A1Z7P9;A1Z7P7;A1Z7Q1;Q8IGK3;A1Z7P8;A1Z7P5	FBgn0003612	Su(var)2-10	35927	TRUE	FALSE	24.38	3.1	3.5e-08	2.3e-06	0.92	-0.048	0.89	0.92	3.5e-06	0.00015	0.49	1
fat	Q9VEP8	FBgn0038465	Irc	42049	TRUE	FALSE	26.52	-0.76	1.8e-06	4.1e-05	0.74	0.16	0.16	0.25	1.3e-05	0.00039	0.16	1
fat	Q9VC52	FBgn0020018	Ppox	42939	FALSE	FALSE	28.8	0.44	0.00052	0.0036	0.24	-0.0069	0.95	0.96	0.0072	0.037	0.78	0.77
fat	Q9V411	FBgn0028473	Non1	35963	FALSE	FALSE	27.6	-0.86	0.0042	0.019	0.088	-1.7	3.5e-06	5.4e-05	0.029	0.1	0.19	0.92
fat	Q9VES8	FBgn0022344	CG10340	42020	FALSE	FALSE	27.6	-0.41	0.0031	0.015	0.11	0.34	0.011	0.032	0.00035	0.0041	0.32	0.99
fat	Q9VEM6	FBgn0038484	CG5246	42072	TRUE	FALSE	27.2	-1.7	3.4e-05	0.00041	0.5	0.03	0.93	0.95	0.00095	0.0086	0.96	1
fat	Q9VHJ2	FBgn0037648	CG11975	41074	FALSE	FALSE	26.45	0.94	3.4e-05	0.00041	0.5	0.54	0.0052	0.017	0.12	0.26	0.21	0.59
fat	Q9VEG6	FBgn0261987	Pxt	42131	FALSE	FALSE	30.69	1.6	0.00033	0.0026	0.28	0.51	0.18	0.28	0.045	0.13	0.21	0.92
fat	Q9VB13	FBgn0266579	tau	326116	FALSE	FALSE	26	-0.28	0.43	0.58	7.2e-05	0.71	0.051	0.11	0.056	0.15	0.0018	0.9
fat	Q7K3C2	FBgn0034021	CG8180	36713	TRUE	FALSE	24.86	2.8	0.00054	0.0037	0.24	-0.33	0.62	0.72	0.0038	0.024	0.021	1
fat	Q9VP61;Q59E09;Q9VP61-2	FBgn0012034	AcCoAS	40348	FALSE	FALSE	35.42	0.36	0.00053	0.0037	0.24	0.59	1.7e-06	3.2e-05	0.063	0.17	0.38	0.2
fat	Q9V3V2	FBgn0010470	Fkbp14	37449	FALSE	FALSE	32.02	-0.22	0.0054	0.023	0.078	0.29	0.00058	0.0029	6.5e-05	0.0013	0.039	0.95
fat	Q9V3Z2;Q9I7L2;Q95SU8	FBgn0037515	Sp7	40918	FALSE	FALSE	26.63	-0.94	9.3e-05	0.00092	0.41	-0.23	0.24	0.35	0.015	0.062	0.34	0.91
fat	Q9VIW6	FBgn0032782	Rab9	35221	FALSE	TRUE	27.54	0.62	3.6e-05	0.00044	0.5	0.67	1.4e-05	0.00015	0.74	0.85	0.12	0.045
fat	Q9W0M4	FBgn0035165	CG13887	38096	FALSE	FALSE	30.26	-0.42	0.029	0.082	0.019	-0.056	0.75	0.82	0.16	0.32	0.11	0.53
fat	Q9W078	FBgn0035280	Cpr62Bb	38240	FALSE	FALSE	32.99	-0.6	0.00074	0.0047	0.22	0.0049	0.97	0.98	0.0096	0.045	0.3	0.89
fat	P29413	FBgn0005585	Calr	41166	FALSE	FALSE	33.05	0.069	0.36	0.51	0.00016	0.37	0.0001	0.00074	0.011	0.049	0.032	0.34
fat	Q9VEY5	FBgn0038400	CG5903	41959	FALSE	FALSE	31.54	-0.23	0.014	0.046	0.04	0.02	0.82	0.87	0.05	0.15	0.077	0.23
fat	P31007-6;P31007-8;P31007;P31007-9;E1JJH5;P31007-4;C1C536;P31007-7	FBgn0001624	dlg1	32083	FALSE	FALSE	25.09	-1.1	0.0082	0.031	0.06	-0.75	0.059	0.12	0.51	0.67	0.11	0.51
fat	Q8SWR8;Q8SWR8-2;Q8SWR8-3	FBgn0041188	Atx2	41883	FALSE	FALSE	28.62	0.43	0.0065	0.026	0.072	0.23	0.12	0.21	0.32	0.5	0.6	0.25
fat	Q9W3U1	FBgn0052732	CG32732	31638	FALSE	FALSE	26.94	-0.48	0.023	0.069	0.025	-0.51	0.017	0.044	0.92	0.95	0.024	0.13
fat	Q9VPP7	FBgn0031253	CG11885	33215	FALSE	FALSE	26.78	0.37	0.042	0.11	0.013	0.28	0.12	0.2	0.71	0.83	0.9	0.15
fat	Q9VGS9	FBgn0026315	Ugt35a	41334	FALSE	FALSE	25.88	-0.63	0.00023	0.0019	0.33	-0.0025	0.99	0.99	0.0046	0.027	0.076	0.92
fat	Q9VGJ6	FBgn0037936	CG6908	41410	TRUE	FALSE	29.62	-0.64	8.3e-05	0.00083	0.43	0.69	3.9e-05	0.00035	7.8e-07	5.9e-05	0.69	1
fat	Q95RY2;Q9VUQ1;Q8MQK5	FBgn0036505	CG7945	39679	FALSE	FALSE	26.93	-0.52	0.0012	0.0068	0.18	-0.72	4.7e-05	0.0004	0.31	0.49	0.23	0.23
fat	Q9VQ11	FBgn0051928	CG31928	326175	FALSE	FALSE	23.53	1.4	0.0067	0.027	0.073	-0.17	0.7	0.78	0.025	0.089	1	0.96
fat	Q9VFC7	FBgn0038294	Mf	41824	FALSE	TRUE	35.22	-0.28	0.0055	0.023	0.083	-0.44	0.00011	0.00079	0.22	0.39	0.1	0.085
fat	Q7KUA4	FBgn0029113	Uba2	44496	FALSE	FALSE	30.1	0.36	0.00051	0.0036	0.26	-0.036	0.68	0.76	0.0041	0.025	0.031	0.68
fat	Q5U0X8	FBgn0033557	CG12325	36144	FALSE	FALSE	23.82	-1	0.0081	0.031	0.065	-0.43	0.21	0.32	0.25	0.42	0.013	0.68
fat	Q9V3Y4	FBgn0027786	Mtch	38026	FALSE	FALSE	31.53	-0.19	0.005	0.021	0.091	0.11	0.07	0.14	0.002	0.015	0.56	0.3
fat	Q9VRJ4	FBgn0035588	CG10672	38598	FALSE	FALSE	32.09	-0.2	0.086	0.18	0.0054	0.36	0.0044	0.015	0.0021	0.016	0.13	0.91
fat	Q9W022	FBgn0035334	CG8993	38301	FALSE	FALSE	31.28	0.31	0.014	0.048	0.042	-0.32	0.012	0.033	0.0011	0.0094	0.09	0.95
fat	E1JIL5;Q9VFB2-2;Q9VFB2	FBgn0038307	mRpS10	NA	FALSE	FALSE	26.04	2.2	0.017	0.055	0.036	-0.61	0.48	0.59	0.03	0.1	0.003	0.97
fat	Q9VET9	FBgn0028381	Decay	42008	FALSE	FALSE	23.35	-1.7	0.021	0.063	0.031	-0.18	0.79	0.85	0.13	0.27	0.13	0.88
fat	Q7KUU5	FBgn0031068	Alr	32991	FALSE	FALSE	25.61	1.2	0.00085	0.0053	0.22	0.26	0.37	0.49	0.042	0.13	0.98	0.9
fat	Q7JQT9	FBgn0033454	CG1671	36019	FALSE	FALSE	24.76	1.2	0.039	0.1	0.016	-1.9	0.002	0.008	0.00066	0.0067	0.0012	1
fat	P08171	FBgn0000592	Est-6	39392	TRUE	FALSE	30.67	-0.42	0.00091	0.0056	0.22	0.64	9.6e-06	0.00012	1.3e-06	8.5e-05	0.073	1
fat	Q9VJJ0	FBgn0032596	Prosbeta4	34999	FALSE	TRUE	31.26	0.28	0.0067	0.027	0.077	0.15	0.1	0.18	0.35	0.53	0.22	0.05
fat	Q8IQH0;Q94887	FBgn0013997	Nrx-IV	39387	FALSE	TRUE	29.65	-0.23	0.0042	0.019	0.1	-0.24	0.0027	0.0099	0.89	0.93	0.78	0.0017
fat	Q9W095	FBgn0035266	Gk2	38221	FALSE	TRUE	32.81	-0.21	0.0057	0.023	0.087	-0.011	0.87	0.91	0.049	0.14	0.14	0.072
fat	A1ZB80;E1JGL5;A1ZB83;A1ZB77;Q7JRI6;A1ZB79;A1ZB78;A1ZB82	FBgn0034345	CG5174	37117	FALSE	FALSE	30.59	0.41	0.0003	0.0023	0.32	0.12	0.2	0.31	0.039	0.12	0.19	0.34
fat	Q9VPM0	FBgn0022246	Rpp30	44392	FALSE	FALSE	24.07	-2.2	4.3e-05	0.00049	0.51	-2	0.0001	0.00073	0.78	0.87	0.85	0.38
fat	P10981	FBgn0000046	Act87E	48632	FALSE	FALSE	33.18	-0.32	0.055	0.13	0.011	-0.25	0.13	0.22	0.74	0.85	0.022	0.12
fat	Q94533	FBgn0015806	S6k	38654	FALSE	FALSE	29.11	1.1	9.8e-08	4.8e-06	0.91	0.74	1.6e-05	0.00017	0.066	0.17	0.4	0.52
fat	Q9VX10	FBgn0030876	CG6762	32768	FALSE	FALSE	26.01	0.42	0.12	0.24	0.0032	1.1	0.00037	0.002	0.065	0.17	0.14	0.84
fat	P02828	FBgn0001233	Hsp83	38389	FALSE	TRUE	35.41	0.26	7e-05	0.00072	0.47	0.025	0.63	0.72	0.004	0.025	0.097	0.071
fat	O18334	FBgn0015797	Rab6	34636	FALSE	FALSE	29.77	0.23	0.011	0.038	0.058	0.034	0.67	0.76	0.1	0.23	0.13	0.1
fat	Q8MLY8	FBgn0039713	RpS8	43532	FALSE	TRUE	34.02	0.29	0.0018	0.0096	0.17	0.2	0.021	0.051	0.43	0.61	0.089	0.018
fat	P07186	FBgn0000358	Cp19	39000	TRUE	FALSE	30.87	1.4	0.019	0.059	0.037	-3.6	3.5e-06	5.4e-05	4.4e-06	0.00018	0.97	1
fat	Q9VC47	FBgn0004885	tok	42944	TRUE	FALSE	23.76	-2.5	7.9e-06	0.00013	0.67	-0.58	0.17	0.26	0.0034	0.022	0.25	0.99
fat	Q9W2Z6	FBgn0052694	CG32694	31933	FALSE	FALSE	28.87	0.47	0.00059	0.004	0.27	-0.022	0.84	0.89	0.0064	0.034	0.15	0.82
fat	Q6IGN6	FBgn0085257	CG34228	5740377	FALSE	FALSE	27.61	0.2	0.15	0.27	0.0024	0.014	0.91	0.94	0.34	0.51	0.014	0.2
fat	Q9V4N3;Q9V4N3-2	FBgn0264294	Cyt-b5	35688	FALSE	FALSE	33.37	0.17	0.29	0.44	0.00048	0.1	0.52	0.62	0.77	0.86	0.0053	0.11
fat	Q9VGP7	FBgn0037892	mRpL40	41364	FALSE	TRUE	28.06	-0.76	5.4e-06	9.7e-05	0.71	-0.67	2.8e-05	0.00027	0.57	0.72	0.93	0.082
fat	Q9XZ19	FBgn0027524	CG3909	41226	FALSE	FALSE	27.14	0.41	0.024	0.071	0.03	0.37	0.037	0.082	0.88	0.93	0.011	0.1
fat	Q0KI00	FBgn0263236	SP1029	53473	FALSE	TRUE	28.8	-0.23	0.017	0.055	0.042	-0.23	0.016	0.041	0.97	0.98	0.022	0.0069
fat	Q9VMM6	FBgn0031737	obst-E	33806	FALSE	FALSE	25.88	1.9	0.024	0.07	0.031	-1	0.2	0.3	0.015	0.061	0.01	0.99
fat	Q9VV51;Q961F9	FBgn0036623	CG4729	39820	FALSE	FALSE	31.76	0.1	0.31	0.46	0.0004	0.36	0.0021	0.0082	0.088	0.21	0.03	0.27
fat	Q8MRM6;Q9W3D6	FBgn0030052	CG12065	31798	FALSE	TRUE	28.81	0.24	0.0041	0.018	0.12	0.18	0.024	0.058	0.57	0.72	0.54	0.0075
fat	P48456	FBgn0010015	CanA1	43670	FALSE	FALSE	24.76	-4.6	0.002	0.011	0.17	-1.1	0.4	0.51	0.067	0.17	0.22	0.95
fat	O97454	FBgn0001491	l(1)10Bb	32069	FALSE	FALSE	23.62	-1.4	0.0018	0.0097	0.18	-0.079	0.84	0.89	0.025	0.089	0.43	0.96
fat	Q86BS3	FBgn0044324	Chro	40508	FALSE	FALSE	28.59	-0.56	0.00069	0.0045	0.26	-0.027	0.85	0.89	0.013	0.055	0.067	0.84
fat	P05990;P05990-2	FBgn0003189	r	32640	FALSE	FALSE	30.07	-0.11	0.21	0.35	0.0012	-0.27	0.0049	0.016	0.19	0.36	0.013	0.075
fat	P07486	FBgn0001091	Gapdh1	35728	FALSE	FALSE	36.01	0.11	0.087	0.18	0.0067	0.47	7.5e-07	1.8e-05	0.00088	0.0083	0.079	0.57
fat	Q9VHW0	FBgn0037547	CG7910	40956	FALSE	FALSE	33.92	-0.36	0.00028	0.0022	0.35	-0.81	1.1e-08	6.3e-07	0.0011	0.0098	0.57	0.81
fat	Q9VNF8	FBgn0262125	Sec23	40694	FALSE	TRUE	30.64	-0.34	0.00075	0.0048	0.26	-0.33	0.00089	0.0041	0.95	0.97	0.65	0.0054
fat	Q9VW26	FBgn0022774	Oat	40145	FALSE	FALSE	32.13	0.1	0.35	0.5	0.00029	0.41	0.0013	0.0057	0.059	0.16	0.0067	0.41
fat	Q9VX01	FBgn0030884	CG6847	32778	FALSE	FALSE	23.24	-0.84	0.0083	0.031	0.076	0.19	0.5	0.61	0.019	0.073	0.13	0.95
fat	Q9VU35;Q9VFN5	FBgn0036334	CG11267	39476	FALSE	FALSE	33.34	0.29	0.0099	0.036	0.067	0.14	0.19	0.29	0.3	0.48	0.94	0.1
fat	Q9VTP0	FBgn0259140	CG42255	39334	FALSE	TRUE	29.55	-0.32	0.00044	0.0032	0.31	-0.34	0.00025	0.0015	0.85	0.91	0.12	0.0036
fat	Q8SZN1	FBgn0051313	CG31313	318677	FALSE	FALSE	31.31	-0.2	0.15	0.28	0.0026	-0.12	0.41	0.52	0.65	0.78	0.026	0.1
fat	P61855	FBgn0004552	Akh	38495	FALSE	FALSE	24.5	-2.5	8.4e-05	0.00084	0.48	-0.71	0.17	0.27	0.019	0.073	0.91	0.97
fat	Q9VZE2	FBgn0035528	CG15012	38529	FALSE	FALSE	25.81	-1.1	3.7e-05	0.00044	0.56	-0.93	0.00014	0.00096	0.66	0.79	0.29	0.22
fat	A1Z9M2;Q9VBM3	FBgn0033906	ReepB	36569	FALSE	FALSE	30.05	-0.82	0.00019	0.0016	0.4	-0.48	0.013	0.037	0.19	0.35	0.36	0.5
fat	Q9VFP1	FBgn0038194	Cyp6d5	41706	FALSE	FALSE	30.89	-0.62	6.6e-07	1.9e-05	0.85	-0.24	0.0095	0.028	0.0044	0.026	0.086	0.64
fat	Q9VF78	FBgn0026634	ldlCp	41870	FALSE	FALSE	25.81	-2.6	0.0052	0.022	0.11	-0.83	0.32	0.44	0.14	0.29	0.1	0.88
fat	Q9VIS4	FBgn0032819	CG10463	35264	FALSE	FALSE	27.47	-0.24	0.06	0.14	0.012	-0.038	0.75	0.82	0.25	0.42	0.0071	0.2
fat	Q9XZH6	FBgn0026753	Vha13	42341	FALSE	FALSE	31.96	-0.63	0.009	0.033	0.074	-0.19	0.4	0.51	0.16	0.32	0.025	0.63
fat	Q27589	FBgn0011576	Cyp4d2	31192	FALSE	FALSE	27.18	-0.79	0.00045	0.0032	0.31	0.067	0.72	0.8	0.0041	0.025	0.25	0.97
fat	Q9VHV5	FBgn0037551	Gie	40961	FALSE	FALSE	29.92	-0.49	0.00061	0.0041	0.28	0.019	0.87	0.91	0.0069	0.036	0.19	0.83
fat	Q9VRJ5	FBgn0035589	CHMP2B	38599	FALSE	FALSE	24.92	-0.84	0.12	0.23	0.0041	0.69	0.2	0.3	0.051	0.15	0.21	0.94
fat	P07909-3;P07909-4;A4V3J6;P07909-2;P07909;A4V3J5	FBgn0001215	Hrb98DE	43385	FALSE	FALSE	28.71	0.48	0.00017	0.0015	0.41	0.088	0.39	0.51	0.014	0.058	0.1	0.63
fat	Q7JW00	FBgn0040773	COX7C	50246	TRUE	FALSE	26.93	2.2	0.00051	0.0036	0.3	-1.4	0.014	0.038	0.00012	0.002	0.11	1
fat	Q9VMV5	FBgn0016075	vkg	33726	FALSE	TRUE	32.42	-0.32	0.002	0.011	0.18	-0.46	5.7e-05	0.00046	0.26	0.44	0.071	0.068
fat	Q7K1C3	FBgn0034191	CG6984	36926	FALSE	TRUE	29.01	0.35	0.0027	0.013	0.16	0.5	0.0001	0.00074	0.31	0.49	0.85	0.094
fat	Q9VIT5	FBgn0032810	CG13077	35252	FALSE	FALSE	24.25	-0.84	0.018	0.057	0.044	-0.057	0.86	0.91	0.1	0.23	0.11	0.83
fat	Q9W1J3	FBgn0034908	CG5543	37768	FALSE	FALSE	23.81	0.65	0.0071	0.028	0.089	-0.096	0.66	0.75	0.024	0.086	0.038	0.9
fat	Q9VFR2;Q8I0D4	FBgn0038181	CG9297	41688	FALSE	FALSE	31.95	-0.31	0.0004	0.0029	0.33	-0.59	1.6e-07	5.4e-06	0.012	0.052	0.26	0.29
fat	Q9W5A7	FBgn0029568	CG11381	31067	TRUE	FALSE	26.46	1.5	0.0019	0.01	0.18	-4	2.3e-08	1.1e-06	3.2e-08	8.2e-06	0.26	1
fat	Q9VF51;Q9VF52;Q8IND5	FBgn0038349	AOX3	41896	FALSE	TRUE	31.92	0.38	4.6e-06	8.5e-05	0.74	0.58	1.2e-08	6.6e-07	0.025	0.089	0.97	0.055
fat	P08761;P08761-2;Q7KUM8;Q7KUN2	FBgn0000565	Eip71CD	39675	FALSE	FALSE	27.99	-0.54	0.00043	0.0031	0.32	0.07	0.58	0.68	0.0029	0.02	0.079	0.93
fat	Q3YMU0	FBgn0033663	ERp60	36270	FALSE	FALSE	33.29	0.22	0.0018	0.0096	0.19	-0.089	0.15	0.24	0.0018	0.014	0.7	0.34
fat	Q8T088	FBgn0037943	CG14722	41419	FALSE	FALSE	23.8	-2	0.007	0.028	0.092	-1.7	0.021	0.052	0.72	0.83	0.52	0.5
fat	Q24572;E1JIL4	FBgn0263979	Caf1-55	41836	FALSE	FALSE	29.85	0.36	0.0027	0.013	0.16	0.092	0.38	0.5	0.084	0.2	0.03	0.31
fat	Q9VN50	FBgn0037270	eIF3f1	40587	FALSE	FALSE	31.03	-0.24	0.0088	0.033	0.079	-0.46	2.2e-05	0.00022	0.067	0.17	0.34	0.16
fat	O76879	FBgn0000092	CG2650	31252	FALSE	FALSE	27.6	-0.4	0.027	0.076	0.032	-1.2	9.3e-07	2.1e-05	0.0027	0.019	0.93	0.97
fat	Q9VN13	FBgn0037239	Sfxn1-3	40552	FALSE	FALSE	33.05	0.15	0.089	0.19	0.0074	0.53	3.6e-06	5.6e-05	0.0032	0.021	0.072	0.66
fat	Q9VU58	FBgn0040813	Nplp2	50286	FALSE	FALSE	35.02	-0.14	0.23	0.37	0.0012	0.94	1.2e-07	4.2e-06	2.1e-06	0.00011	0.00064	1
fat	Q9VHB8	FBgn0037709	CG8199	41149	FALSE	TRUE	30.43	0.3	0.0027	0.014	0.16	0.47	3.5e-05	0.00032	0.17	0.33	0.39	0.094
fat	Q960J9	FBgn0052633	CG32633	326225	FALSE	FALSE	23.24	-1.1	0.11	0.21	0.0057	-0.48	0.45	0.56	0.52	0.68	0.22	0.61
fat	Q9VN14	FBgn0037240	Cont	40553	FALSE	TRUE	30.65	-0.14	0.024	0.07	0.036	-0.069	0.23	0.33	0.4	0.58	0.26	0.0012
fat	Q8MLS7;Q7K274	FBgn0021979	l(2)k09913	37661	FALSE	TRUE	30.8	0.32	0.0043	0.019	0.13	0.32	0.0043	0.014	1	1	0.43	0.012
fat	A1Z6G4	FBgn0039970	CG17508	49893	FALSE	FALSE	27.18	0.39	0.0046	0.02	0.12	-0.22	0.086	0.16	0.0022	0.016	0.034	0.94
fat	Q7PLT4	FBgn0263977	Tim17b	3355107	FALSE	FALSE	27.21	-0.48	0.00099	0.0059	0.25	-0.81	3.4e-06	5.3e-05	0.071	0.18	0.18	0.47
fat	P02517	FBgn0001225	Hsp26	39075	TRUE	FALSE	31.61	1.2	3.9e-05	0.00046	0.58	-0.16	0.49	0.6	0.00041	0.0047	0.18	1
fat	P29746	FBgn0001090	bnb	32872	FALSE	FALSE	30.29	0.26	0.061	0.14	0.014	0.26	0.062	0.12	0.99	1	0.044	0.041
fat	Q9VY62	FBgn0030539	CG1368	32361	FALSE	FALSE	30.44	-1.2	2.2e-05	0.0003	0.63	-1.3	1.3e-05	0.00015	0.86	0.92	0.084	0.18
fat	Q9VBI2	FBgn0028833	Dak1	43165	FALSE	FALSE	31.53	-0.27	0.0032	0.015	0.15	0.12	0.14	0.23	0.0025	0.018	0.14	0.68
fat	A1Z6F6;Q7JQF6;A1Z6F4;B7YZT1	FBgn0259247	stw	35494	FALSE	FALSE	27.91	0.22	0.072	0.16	0.011	0.37	0.0054	0.018	0.39	0.56	0.51	0.12
fat	Q7JX87;A1Z892	FBgn0033518	Prx2540-2	36098	FALSE	FALSE	33.56	-0.12	0.16	0.29	0.0028	0.99	5.4e-10	6.6e-08	2e-08	6.1e-06	0.00082	1
fat	Q9VHQ5	FBgn0037592	CG11737	41009	FALSE	FALSE	24.75	-0.92	0.0012	0.0067	0.24	-1.5	7.1e-06	9.6e-05	0.11	0.24	0.29	0.75
fat	Q9VHS2	FBgn0040529	COX7A	50002	FALSE	FALSE	33.06	0.16	0.058	0.14	0.015	0.16	0.059	0.12	0.99	0.99	0.00046	0.0037
fat	Q9VP46	FBgn0037074	CG7324	40361	FALSE	TRUE	28.92	-0.19	0.0074	0.029	0.096	-0.054	0.41	0.52	0.14	0.29	0.37	0.02
fat	Q8IP62	FBgn0260407	mRpS23	318977	FALSE	FALSE	27.53	-0.56	4.2e-05	0.00048	0.58	-0.11	0.28	0.39	0.0072	0.037	0.079	0.75
fat	Q9VHR8-2;Q9VHR8	FBgn0037580	DppIII	40996	FALSE	FALSE	33.45	0.25	0.0027	0.014	0.17	0.0047	0.95	0.96	0.027	0.094	0.037	0.17
fat	P27864;B7YZZ9	FBgn0004584	Rrp1	33500	FALSE	FALSE	24.11	1.1	4.9e-05	0.00054	0.57	0.2	0.36	0.47	0.0063	0.034	0.15	0.97
fat	Q06521	FBgn0003983	Vm34Ca	34758	TRUE	FALSE	30.2	0.95	0.00058	0.0039	0.32	-0.35	0.14	0.24	0.00079	0.0077	0.93	1
fat	Q7JWD6	FBgn0266711	EloC	37237	FALSE	FALSE	31.1	0.26	0.092	0.19	0.0084	0.53	0.0018	0.0071	0.2	0.36	0.011	0.37
fat	Q9VBU8	FBgn0039301	Nup37	43040	FALSE	FALSE	25.89	-0.69	0.0029	0.014	0.17	-0.67	0.0035	0.012	0.95	0.97	0.017	0.14
fat	P54622	FBgn0010438	mtSSB	41968	TRUE	FALSE	28.63	0.3	0.0021	0.011	0.2	-0.59	1.7e-06	3.3e-05	7e-07	5.5e-05	0.019	1
fat	P02516	FBgn0001224	Hsp23	39077	FALSE	FALSE	26.31	-0.51	0.014	0.047	0.064	-1.9	7.3e-09	4.6e-07	4.7e-05	0.001	0.3	1
fat	Q6IDF5	FBgn0033961	ND-B15	36640	FALSE	FALSE	32.02	-0.37	0.022	0.065	0.045	-0.26	0.09	0.17	0.61	0.75	0.064	0.14
fat	Q7JWX3	FBgn0002930	nec	45908	FALSE	FALSE	31.43	-0.33	0.0042	0.019	0.14	-0.13	0.21	0.31	0.18	0.34	0.039	0.16
fat	Q9VW14	FBgn0036889	CG14100	40132	FALSE	FALSE	24.4	0.57	0.0068	0.027	0.11	-0.33	0.091	0.17	0.0031	0.021	0.016	0.98
fat	P84029;P04657;CON__P62894	FBgn0000409	Cyt-c-p	34996	FALSE	FALSE	33.03	-0.063	0.46	0.61	0.00015	-0.16	0.066	0.13	0.41	0.58	0.0091	0.029
fat	Q9VE75	FBgn0028670	Vha100-2	42216	FALSE	TRUE	31.66	-0.23	0.0012	0.0069	0.25	-0.35	1.9e-05	0.0002	0.19	0.35	0.073	0.0093
fat	Q9VEP3	FBgn0038469	CG4009	42054	FALSE	FALSE	25.62	-1.8	0.069	0.16	0.013	-4.7	6.7e-05	0.00053	0.034	0.11	0.42	0.97
fat	Q9VUH9;Q9VUH9	FBgn0036451	CG9425	39613	FALSE	FALSE	24.33	0.96	0.026	0.075	0.039	-0.13	0.75	0.82	0.068	0.17	0.68	0.9
fat	Q9VXR3	FBgn0030674	CG8184	32510	FALSE	FALSE	27.84	-0.29	0.066	0.15	0.014	-0.27	0.076	0.15	0.96	0.97	0.52	0.064
fat	Q9V8M2	FBgn0034387	Cyp12b2	37163	FALSE	FALSE	29.9	-0.45	4.7e-05	0.00053	0.58	0.056	0.52	0.62	0.0005	0.0054	0.085	0.91
fat	Q9VJI7	FBgn0261068	LSm7	35003	FALSE	FALSE	27.36	-0.84	0.0004	0.003	0.37	-0.68	0.0024	0.0091	0.57	0.72	0.032	0.25
fat	A1ZBU8	FBgn0034512	CG18067	37314	FALSE	FALSE	31.59	-0.37	0.036	0.094	0.029	0.21	0.22	0.32	0.022	0.081	0.026	0.84
fat	Q9VIH3	FBgn0266369	Mtp	35362	FALSE	FALSE	33.12	-0.21	0.0043	0.019	0.14	0.22	0.0035	0.012	0.00019	0.0027	0.13	0.84
fat	B7Z0B9;Q86NR7;Q9VRM2;A8JNL3	FBgn0035612	frm	38624	FALSE	TRUE	28.98	-0.3	0.0082	0.031	0.099	-0.29	0.012	0.032	0.91	0.95	0.84	0.019
fat	Q7KTI5;Q7KTI6;Q9VLQ4;Q8IPG0	FBgn0032010	CG8086	34131	FALSE	FALSE	26.56	-0.65	0.00028	0.0022	0.41	-0.56	0.0013	0.0055	0.64	0.77	0.48	0.13
fat	Q9VPR2	FBgn0031264	CG11835	33232	FALSE	FALSE	25.68	0.68	0.22	0.37	0.0017	0.64	0.25	0.36	0.96	0.98	0.0034	0.35
fat	Q24046	FBgn0015776	nrv1	33952	FALSE	TRUE	30.9	-0.35	1.8e-05	0.00026	0.67	-0.37	8.3e-06	0.00011	0.79	0.88	0.92	0.00083
fat	Q9VWI1;E1JJR3	FBgn0020261	pcm	32935	FALSE	FALSE	25.64	0.53	0.0086	0.032	0.097	0.11	0.57	0.67	0.11	0.25	0.0061	0.63
fat	Q961C4	FBgn0039226	Ude	42953	FALSE	FALSE	28.63	-0.13	0.29	0.44	0.00091	0.1	0.41	0.52	0.19	0.35	0.36	0.27
fat	Q9VPI4;Q0E8V4;A8DYS5;Q9VPI3	FBgn0051973	Cda5	33158	FALSE	TRUE	25.74	0.37	0.015	0.05	0.066	0.3	0.046	0.097	0.7	0.82	0.31	0.097
fat	Q9VSZ1	FBgn0035995	CG3529	39093	FALSE	TRUE	29.78	-0.43	0.00054	0.0037	0.34	-0.31	0.0073	0.023	0.41	0.59	0.36	0.074
fat	Q9VD68;B7Z0P0	FBgn0038912	CG6656	42576	FALSE	FALSE	24.81	-1.6	0.012	0.041	0.079	-1	0.091	0.17	0.48	0.65	0.23	0.61
fat	Q9VM75	FBgn0086451	l(2)k09022	33960	FALSE	FALSE	25.51	-0.33	0.45	0.59	0.0002	-2.3	3.8e-05	0.00034	0.004	0.025	0.002	0.99
fat	A8JNU6	FBgn0010352	Nc73EF	39899	FALSE	TRUE	35.2	-0.22	0.0018	0.0098	0.22	-0.14	0.037	0.081	0.34	0.52	0.077	0.0041
fat	Q9VQR5	FBgn0031542	CG15414	33570	FALSE	TRUE	27.12	0.48	0.00022	0.0018	0.44	0.36	0.003	0.011	0.41	0.59	0.56	0.078
fat	A8JNG6	FBgn0085483	CG34454	5740130	FALSE	FALSE	30.24	0.29	0.078	0.17	0.012	0.42	0.015	0.039	0.56	0.72	0.032	0.17
fat	Q9VHT2	FBgn0037569	tex	40983	FALSE	FALSE	24.93	-1.1	0.00034	0.0026	0.4	-0.99	0.00084	0.0039	0.77	0.87	0.059	0.25
fat	Q9VJ44	FBgn0032715	CG17597	35140	FALSE	FALSE	29.21	-0.24	0.0052	0.022	0.14	0.12	0.14	0.23	0.0035	0.023	0.56	0.57
fat	Q8MT77;Q9VIG9;Q7KT22	FBgn0051793	CG31793	326161	FALSE	FALSE	26.33	-0.81	5e-07	1.5e-05	0.9	-0.21	0.059	0.12	0.00085	0.008	0.7	0.95
fat	Q9VNF9	FBgn0037358	elm	40695	FALSE	FALSE	27.84	-0.6	0.0013	0.0072	0.27	-0.43	0.014	0.038	0.45	0.62	0.43	0.23
fat	Q9VL96	FBgn0032138	CG4364	34287	FALSE	FALSE	27.09	-0.32	0.012	0.042	0.085	-1.2	7.8e-09	4.9e-07	5.7e-05	0.0012	0.19	1
fat	Q9VL11	FBgn0032205	CG4957	34374	FALSE	FALSE	25.37	-1.4	0.026	0.074	0.046	-1.3	0.036	0.08	0.91	0.94	0.28	0.39
fat	O18680	FBgn0020764	Alas	37815	FALSE	FALSE	25.86	-0.23	0.13	0.25	0.0062	0.58	0.00099	0.0045	0.0011	0.0094	0.32	0.98
fat	Q9VX62	FBgn0030834	CG8675	32716	FALSE	FALSE	24.35	0.62	0.014	0.046	0.078	-0.44	0.068	0.13	0.004	0.025	0.14	0.98
fat	Q9VQR9	FBgn0031544	CG17593	33573	FALSE	FALSE	29.16	-0.24	0.014	0.047	0.078	-0.6	2.3e-06	4e-05	0.0092	0.044	0.8	0.56
fat	Q9VMI5	FBgn0031769	CG9135	33850	TRUE	FALSE	28.19	1.5	4.1e-05	0.00047	0.63	-0.46	0.12	0.2	0.0001	0.0018	0.2	1
fat	Q9NKV0-3;Q9NKV0-2;E1JH79;Q9NKV0-4;Q9NKV0	FBgn0034051	Mlf	36750	FALSE	FALSE	23.91	-1.4	0.0032	0.015	0.18	-1.6	0.0016	0.0065	0.82	0.89	0.39	0.37
fat	Q9W4V8;Q9V9P3;Q9W0S3	FBgn0250874	ttm50	31266	FALSE	TRUE	30.01	-0.39	0.0011	0.0066	0.29	-0.36	0.0023	0.0088	0.83	0.9	0.056	0.022
fat	Q9VUV9	FBgn0263599	l(3)72Ab	39737	FALSE	FALSE	28.86	-0.34	0.0059	0.024	0.14	-0.69	5.9e-06	8.1e-05	0.034	0.11	0.22	0.53
fat	Q9VUY9	FBgn0003076	Pgm	44010	FALSE	FALSE	35.55	0.14	0.059	0.14	0.021	0.47	2.3e-06	4.1e-05	0.0031	0.021	0.039	0.48
fat	Q04499-2;A4V4U5;Q04499-5;Q04499-4	FBgn0003423	slgA	33117	FALSE	FALSE	29.61	-0.25	0.019	0.059	0.063	-0.56	1.4e-05	0.00015	0.029	0.1	0.025	0.44
fat	Q9VKZ6	FBgn0032218	CG5381	34389	FALSE	FALSE	28.95	-0.1	0.28	0.44	0.0012	0.36	0.0013	0.0056	0.0027	0.019	0.00014	0.81
fat	A1ZAA9	FBgn0034081	CG10731	3772305	FALSE	FALSE	26.87	0.24	0.046	0.11	0.028	0.12	0.29	0.41	0.46	0.63	0.11	0.083
fat	Q9VW34	FBgn0260653	serp	40150	FALSE	FALSE	23.05	0.26	0.44	0.59	0.00028	-0.95	0.01	0.029	0.018	0.072	0.00063	0.96
fat	Q7JVH6	FBgn0033101	CG9436	35586	FALSE	FALSE	32.33	-0.39	1.7e-05	0.00025	0.71	-0.11	0.12	0.21	0.0082	0.041	0.22	0.27
fat	Q9VH81	FBgn0005777	PpD3	49779	FALSE	TRUE	29.41	0.48	4.2e-05	0.00048	0.63	0.46	6.5e-05	0.00052	0.88	0.93	0.37	0.0099
fat	Q9VYH3	FBgn0030447	CG2200	32258	FALSE	FALSE	30.32	-0.4	0.0037	0.017	0.18	-0.097	0.44	0.55	0.089	0.21	0.55	0.43
fat	Q9VCG4	FBgn0039125	Ndc1	42825	FALSE	FALSE	24.64	1.5	0.014	0.047	0.082	-0.43	0.44	0.56	0.024	0.085	0.011	0.97
fat	Q9VN73	FBgn0037290	CG1124	40613	FALSE	FALSE	25.45	-0.55	0.0047	0.021	0.16	-0.57	0.0034	0.012	0.92	0.95	0.82	0.1
fat	Q9VCQ9	FBgn0039052	CG6733	42731	FALSE	FALSE	27.73	0.39	0.05	0.12	0.026	0.051	0.79	0.85	0.21	0.38	0.34	0.5
fat	Q9VEB3	FBgn0038585	Non3	42183	FALSE	FALSE	28.34	-0.35	0.0021	0.011	0.23	-0.9	3.1e-08	1.4e-06	0.00076	0.0075	0.065	0.93
fat	Q9VIT9	FBgn0041180	Tep4	35248	FALSE	TRUE	33.16	-0.18	0.012	0.041	0.093	0.029	0.66	0.75	0.034	0.11	0.16	0.092
fat	Q7K4Q5;E2QC56	FBgn0033021	CG10417	35492	FALSE	FALSE	27.16	0.69	0.0007	0.0045	0.35	0.43	0.02	0.051	0.29	0.46	0.63	0.37
fat	Q9W373	FBgn0030102	SmydA-9	31859	FALSE	TRUE	29.71	-0.46	0.00014	0.0013	0.52	-0.36	0.0016	0.0066	0.44	0.61	0.68	0.05
fat	Q9VUW2	FBgn0036551	CG17029	39740	FALSE	FALSE	28.1	-0.59	0.004	0.018	0.18	0.057	0.75	0.82	0.02	0.075	0.31	0.88
fat	Q9W3N1	FBgn0029975	spidey	31703	FALSE	TRUE	33.12	0.2	0.012	0.042	0.093	0.2	0.015	0.039	0.95	0.97	0.47	0.0021
fat	Q24276	FBgn0011573	Cdc37	38232	FALSE	FALSE	29.54	0.54	0.00039	0.0029	0.42	0.044	0.73	0.81	0.011	0.049	0.95	0.81
fat	O61613	FBgn0020392	Nmt	38909	FALSE	FALSE	30.23	0.36	0.00065	0.0043	0.36	-0.011	0.9	0.93	0.0077	0.039	0.045	0.61
fat	Q9VCW3	FBgn0039004	Nup133	42680	FALSE	FALSE	26.74	-0.75	0.0031	0.015	0.2	-0.8	0.0019	0.0077	0.88	0.93	0.091	0.18
fat	A8DY69;Q8SXP0	FBgn0263593	Lpin	35790	FALSE	TRUE	29.86	-0.3	0.00012	0.0011	0.54	-0.42	2.6e-06	4.5e-05	0.2	0.37	0.3	0.0097
fat	P40301	FBgn0086134	Prosalpha2	41531	FALSE	TRUE	32.44	0.25	0.0087	0.033	0.12	0.24	0.01	0.029	0.96	0.98	0.63	0.0054
fat	Q9VNW6	FBgn0037146	CG7470	40443	FALSE	TRUE	36.27	0.2	0.00037	0.0028	0.42	0.3	3.9e-06	5.9e-05	0.14	0.29	0.25	0.00075
fat	P19351-11	FBgn0004169	up	32314	FALSE	FALSE	28.46	-1.3	0.024	0.07	0.057	0.56	0.3	0.42	0.023	0.083	0.17	0.97
fat	Q8IPP4;Q9VN82;Q8IPP3	FBgn0259212	cno	40620	FALSE	FALSE	24.76	0.48	0.009	0.033	0.12	-0.092	0.58	0.68	0.024	0.086	0.52	0.83
fat	Q9VPD2	FBgn0037011	CG4858	40282	FALSE	FALSE	27.58	0.44	0.016	0.053	0.077	-0.083	0.62	0.71	0.039	0.12	0.1	0.77
fat	Q9VUW1	FBgn0036550	CG17026	39739	FALSE	FALSE	27.8	-0.12	0.36	0.51	0.0007	0.043	0.75	0.82	0.38	0.56	0.076	0.18
fat	Q7JYK2	FBgn0033214	CG1941	35718	FALSE	FALSE	25.36	-0.72	0.00011	0.001	0.56	-0.97	3e-06	5e-05	0.23	0.41	0.58	0.34
fat	Q9VNR2;C1C5A0;Q8IPS6;A8JNX2;Q7KTU2	FBgn0052451	SPoCk	40495	FALSE	FALSE	27.29	-0.52	0.00038	0.0028	0.43	0.15	0.22	0.33	0.00089	0.0083	0.14	0.97
fat	Q9VC06	FBgn0039252	CG11771	42984	FALSE	TRUE	30.03	-0.35	1.4e-05	0.0002	0.75	-0.46	3.4e-07	9.5e-06	0.19	0.35	0.83	0.0062
fat	Q9VGJ8	FBgn0037934	CG6830	41408	FALSE	FALSE	25.12	-1.1	0.072	0.16	0.019	-1.8	0.0082	0.025	0.46	0.63	0.0035	0.63
fat	Q9VKQ9	FBgn0032293	Dpy-30L1	34480	FALSE	FALSE	25.81	-2.3	0.012	0.041	0.1	-1.1	0.19	0.29	0.32	0.5	0.9	0.76
fat	Q7K0E6	FBgn0002069	AspRS	36420	FALSE	FALSE	31.5	-0.3	0.00015	0.0013	0.53	-0.057	0.38	0.49	0.013	0.056	0.86	0.15
fat	Q7JRC3	FBgn0010053	Jheh1	251984	FALSE	FALSE	32.24	-0.11	0.17	0.3	0.005	0.85	2.5e-09	2.1e-07	7.2e-08	1.4e-05	0.14	1
fat	Q8MLW4	FBgn0050392	CG30392	246587	FALSE	FALSE	24.64	-0.52	0.055	0.13	0.027	0.015	0.95	0.97	0.15	0.3	0.1	0.71
fat	Q9W1L8	FBgn0034887	St1	37742	FALSE	FALSE	27.75	0.46	0.31	0.46	0.0012	1.1	0.023	0.055	0.32	0.5	0.02	0.68
fat	Q9XYU0	FBgn0020633	Mcm7	39014	TRUE	FALSE	25.83	2.1	0.00022	0.0018	0.5	-0.078	0.86	0.91	0.0033	0.022	0.07	0.99
fat	Q9VLW9	FBgn0031950	Herp	34065	TRUE	FALSE	23.65	-1.4	0.0011	0.0066	0.32	0.35	0.35	0.47	0.0031	0.021	0.15	0.99
fat	Q9VQF7	FBgn0031453	Bacc	33462	FALSE	FALSE	29.25	1.7	0.0049	0.021	0.17	0.43	0.42	0.54	0.11	0.24	0.027	0.88
fat	Q7KV27;Q9VYD9	FBgn0030478	CG1640	32292	FALSE	TRUE	34.73	0.14	0.028	0.079	0.053	0.09	0.14	0.23	0.55	0.71	0.052	0.0013
fat	Q86BG8;Q961L8	FBgn0053056	CG33056	326246	FALSE	FALSE	27.83	0.46	0.0019	0.0099	0.27	0.078	0.55	0.65	0.046	0.14	0.46	0.59
fat	Q7K3P6	FBgn0034247	CG6484	36994	TRUE	FALSE	26.91	-0.86	0.0026	0.013	0.23	0.48	0.067	0.13	0.0012	0.01	0.28	0.99
fat	Q7KW39-2;Q7KW39	FBgn0023537	CG17896	30995	FALSE	TRUE	33.68	0.17	0.03	0.083	0.051	0.33	0.0002	0.0013	0.12	0.26	0.51	0.045
fat	Q9I7I7	FBgn0038788	Sirt2	42414	FALSE	FALSE	25.77	0.57	0.013	0.044	0.099	-0.18	0.4	0.52	0.02	0.075	0.054	0.91
fat	E1JJD6;E1JJD6;Q9W4M7;Q9W4M7	FBgn0026083	tyf	31363	FALSE	FALSE	27.34	0.53	0.017	0.055	0.08	-0.49	0.026	0.061	0.0022	0.016	0.2	0.99
fat	Q9W2S1;Q7KVQ7	FBgn0052675	Tango5	326232	FALSE	FALSE	28.15	-0.23	0.032	0.087	0.048	0.32	0.004	0.014	0.00091	0.0084	0.085	0.93
fat	Q7KY04	FBgn0016701	Rab4	36992	FALSE	FALSE	28.36	-0.4	0.0016	0.0087	0.29	-0.12	0.3	0.41	0.077	0.19	0.096	0.36
fat	O76927-2;O76927	FBgn0015521	RpS21	33487	FALSE	FALSE	31.39	0.36	0.025	0.072	0.06	0.45	0.0075	0.023	0.69	0.81	0.078	0.12
fat	Q9VED8	FBgn0000477	DNaseII	48228	FALSE	FALSE	28.46	-0.3	0.12	0.23	0.0096	-0.056	0.76	0.83	0.36	0.54	0.014	0.36
fat	Q9VY87	FBgn0030521	CtsB1	32341	FALSE	FALSE	31.14	-0.31	0.0037	0.017	0.2	0.15	0.12	0.2	0.0024	0.018	0.12	0.82
fat	Q9VFD3	FBgn0261859	CG42788	41817	TRUE	FALSE	26.72	-0.65	2.4e-05	0.00032	0.71	0.46	0.00086	0.004	2.4e-06	0.00012	0.36	1
fat	Q9VYI6	FBgn0052649	CG32649	32239	FALSE	FALSE	27.94	-0.41	0.0077	0.03	0.14	0.1	0.46	0.57	0.016	0.065	0.46	0.8
fat	Q9VSC5	FBgn0035830	CG8209	38888	FALSE	FALSE	31.03	0.23	0.015	0.048	0.093	0.47	3.3e-05	0.00031	0.063	0.17	0.19	0.2
fat	Q9VEQ0;Q9VPT2	FBgn0038463	CG3534	42047	FALSE	FALSE	31.12	-0.18	0.031	0.085	0.051	0.18	0.027	0.064	0.0036	0.023	0.027	0.57
fat	Q9VVQ5	FBgn0265268	CG18234	40024	FALSE	FALSE	26.78	0.56	0.00044	0.0032	0.43	0.017	0.9	0.93	0.0087	0.042	0.14	0.85
fat	Q9VH55	FBgn0037765	CG9458	41214	FALSE	FALSE	25.77	-0.94	0.0027	0.014	0.23	-0.9	0.0036	0.013	0.93	0.96	0.16	0.21
fat	Q9W228	FBgn0040091	Ugt58Fa	37590	FALSE	FALSE	26.12	-0.31	0.2	0.34	0.004	-0.76	0.0039	0.013	0.18	0.34	0.021	0.64
fat	Q8SZK5	FBgn0051769	CG31769	318934	FALSE	FALSE	28.26	0.33	0.29	0.44	0.0017	-0.094	0.76	0.83	0.33	0.51	0.0089	0.58
fat	Q9VTU4	FBgn0036258	eIF3l	39386	FALSE	TRUE	30.97	-0.27	0.0074	0.029	0.15	-0.21	0.03	0.069	0.64	0.78	0.2	0.018
fat	Q9VGT0	FBgn0026314	Ugt35b	41333	FALSE	FALSE	23.72	0.052	0.9	0.93	1e-06	0.32	0.44	0.55	0.65	0.78	0.014	0.45
fat	O97479	FBgn0024289	Sodh-1	40836	FALSE	FALSE	33.09	-0.066	0.66	0.77	4.8e-05	-0.41	0.014	0.037	0.12	0.26	0.0014	0.5
fat	Q9V434	FBgn0086443	AsnRS	35194	FALSE	FALSE	31.13	0.4	9.1e-07	2.4e-05	0.9	0.14	0.02	0.051	0.0033	0.022	0.21	0.15
fat	P52654-3;P52654-2;P52654	FBgn0011289	TfIIA-L	43284	FALSE	FALSE	25.3	-0.41	0.012	0.042	0.11	0.15	0.33	0.45	0.016	0.063	0.42	0.84
fat	Q0E8P5	FBgn0032666	CG5758	35083	FALSE	FALSE	24.52	-0.75	0.039	0.1	0.044	-1	0.0068	0.021	0.56	0.72	0.0029	0.45
fat	Q7JW03	FBgn0029996	UbcE2H	31728	FALSE	FALSE	28.88	0.52	0.0026	0.013	0.25	1.3	9.3e-08	3.4e-06	0.0019	0.015	0.15	0.97
fat	Q9VJ45	FBgn0027070	CG17322	35139	FALSE	FALSE	29.62	0.2	0.092	0.19	0.016	0.37	0.0053	0.017	0.34	0.51	0.29	0.14
fat	Q9VG33	FBgn0038080	CG12279	41570	FALSE	FALSE	30.3	0.26	0.033	0.09	0.051	0.63	3.8e-05	0.00034	0.039	0.12	0.27	0.55
fat	Q07171;Q07171-3;Q07171-5	FBgn0010225	Gel	46008	FALSE	FALSE	32.18	-0.25	0.00039	0.0029	0.46	0.16	0.014	0.038	9.7e-05	0.0017	0.22	0.79
fat	Q7K4Y0;Q9VG68	FBgn0086687	Desat1	117369	FALSE	TRUE	33.59	-0.29	0.004	0.018	0.21	-0.18	0.054	0.11	0.39	0.56	0.19	0.037
fat	P15007-2;E1JHR5;P15007	FBgn0000579	Eno	33351	FALSE	FALSE	36.5	-0.066	0.26	0.41	0.0024	0.27	0.00021	0.0013	0.0007	0.0071	0.018	0.46
fat	Q9VIQ4	FBgn0014000	Hf	44038	FALSE	FALSE	26.94	-0.77	0.00099	0.0059	0.36	-0.14	0.48	0.59	0.035	0.11	0.2	0.85
fat	P20354-2;P20354;P20354	FBgn0001123	Galphas	37805	FALSE	FALSE	29.13	-0.27	0.016	0.052	0.096	-0.011	0.92	0.94	0.087	0.21	0.053	0.29
fat	Q9VWT3	FBgn0030932	Ggt-1	32839	FALSE	FALSE	24.68	-1.4	0.043	0.11	0.042	-2.8	0.00046	0.0025	0.16	0.31	0.026	0.86
fat	Q9VNB9	FBgn0037328	RpL35A	40654	FALSE	FALSE	32.69	-0.36	0.0038	0.017	0.22	-0.81	7.8e-07	1.9e-05	0.0096	0.045	0.085	0.75
fat	P91875	FBgn0019938	RpI1	36617	FALSE	FALSE	29.12	-1.3	0.00086	0.0054	0.38	-0.25	0.44	0.55	0.036	0.11	0.18	0.93
fat	Q9VMJ5	FBgn0001089	Gal	33839	FALSE	FALSE	28.23	-0.19	0.19	0.33	0.0048	0.35	0.02	0.05	0.013	0.056	0.0018	0.84
fat	Q9VBU2	FBgn0039306	RIOK2	43046	FALSE	FALSE	23.84	1.1	0.00065	0.0043	0.41	0.8	0.0059	0.019	0.49	0.65	0.43	0.41
fat	P17789;P42282	FBgn0003870	ttk	48317	FALSE	FALSE	23.53	-2.1	0.00092	0.0056	0.37	-0.68	0.21	0.31	0.076	0.19	0.87	0.91
fat	Q9VV76	FBgn0036643	Syx8	39847	FALSE	FALSE	27.44	0.26	0.014	0.047	0.11	-0.17	0.09	0.17	0.0051	0.029	0.12	0.74
fat	Q9VQD8	FBgn0031437	Arpc5	33444	FALSE	FALSE	27.25	0.73	0.024	0.071	0.07	0.051	0.86	0.91	0.12	0.26	0.85	0.78
fat	Q8SXR1	FBgn0053126	NLaz	33324	FALSE	FALSE	29.13	-0.32	0.22	0.36	0.0037	-0.47	0.083	0.16	0.69	0.81	0.0091	0.3
fat	A8DYP0;Q59E65;REV__Q9VH55;Q9I7L0	FBgn0053519	Unc-89	3346201	FALSE	TRUE	33.67	-0.41	4.3e-05	0.00049	0.69	-0.28	0.0019	0.0076	0.23	0.4	0.65	0.037
fat	Q9VD02	FBgn0038972	CG7054	42643	FALSE	FALSE	28.86	0.36	0.00054	0.0037	0.43	0.54	5.4e-06	7.5e-05	0.14	0.28	0.21	0.11
fat	P52029;CON__Q3ZBD7	FBgn0003074	Pgi	35886	FALSE	FALSE	34.9	-0.14	0.016	0.052	0.099	0.34	3.6e-06	5.6e-05	4e-06	0.00017	0.097	0.96
fat	Q9VSU3	FBgn0040827	CG13315	50300	FALSE	FALSE	27.85	-0.85	0.018	0.056	0.092	-0.26	0.43	0.54	0.22	0.39	0.015	0.7
fat	Q8INJ4;Q9VGF8;A8JQY2	FBgn0260742	CG12213	41447	FALSE	FALSE	26.71	-0.47	0.02	0.061	0.083	0.52	0.011	0.03	0.0013	0.011	0.18	0.99
fat	Q9VYT3	FBgn0030344	Nrd1	32143	FALSE	TRUE	29.04	0.23	0.0048	0.021	0.2	0.36	7.1e-05	0.00055	0.19	0.35	0.23	0.028
fat	Q9VBT1	FBgn0051098	CG31098	43057	FALSE	FALSE	26.32	-0.23	0.12	0.23	0.012	-0.2	0.18	0.28	0.86	0.91	0.0057	0.072
fat	Q9VTZ5	FBgn0036299	Tsf2	39435	FALSE	FALSE	28.98	0.22	0.016	0.051	0.1	-0.0063	0.94	0.96	0.068	0.17	0.42	0.17
fat	Q8IRG9;Q8IRG8;Q9W0E3	FBgn0035227	Iml1	38176	FALSE	FALSE	23.98	0.98	0.17	0.3	0.0066	-1	0.17	0.26	0.058	0.16	0.074	0.94
fat	Q59DY1	FBgn0053509	CG33509	3346225	FALSE	FALSE	23.72	0.097	0.64	0.76	7.7e-05	1.1	4.2e-05	0.00037	0.0027	0.019	0.1	0.98
fat	Q7KN75;REV__B7Z026	FBgn0027835	Dp1	37116	FALSE	TRUE	33.24	-0.1	0.037	0.097	0.05	0.049	0.3	0.42	0.031	0.1	0.05	0.0055
fat	P15357;Q9W418;P0CG69;A4V1F9	FBgn0003942	RpS27A	34420	FALSE	FALSE	34.25	-0.3	0.0011	0.0063	0.36	0.17	0.039	0.084	0.00041	0.0047	0.2	0.87
fat	Q9VLC5	FBgn0012036	Aldh	34256	FALSE	TRUE	36.84	0.27	0.0051	0.022	0.2	0.25	0.0097	0.028	0.84	0.9	0.14	0.009
fat	Q9W3G8	FBgn0030029	CG15343	31765	FALSE	FALSE	25.42	-0.58	0.12	0.24	0.012	0.34	0.36	0.48	0.088	0.21	0.067	0.86
fat	Q9VZQ8;Q8IRD4;Q8IRD3	FBgn0035438	PHGPx	38413	FALSE	FALSE	33.38	0.14	0.034	0.091	0.056	0.72	1e-09	1e-07	3.5e-06	0.00015	0.15	0.99
fat	Q961K6	FBgn0035091	CG3829	38000	FALSE	FALSE	27.45	0.3	0.038	0.099	0.05	0.66	0.00012	0.00085	0.077	0.19	0.038	0.54
fat	Q9Y157;B7Z0T0	FBgn0027930	MP1	40541	FALSE	FALSE	26.1	-1.3	0.00019	0.0016	0.56	-1	0.0012	0.0054	0.55	0.71	0.13	0.39
fat	Q9VQT5	FBgn0031558	CG16704	33589	FALSE	FALSE	23.3	-0.77	0.32	0.47	0.0016	-0.41	0.59	0.69	0.74	0.85	0.0039	0.51
fat	Q9VL89	FBgn0025117	und	34294	FALSE	FALSE	30.43	0.2	0.022	0.066	0.082	-0.017	0.83	0.88	0.07	0.18	0.73	0.15
fat	Q24509;A4V0S1	FBgn0011708	Syx5	34966	FALSE	FALSE	26.79	-0.42	0.056	0.13	0.034	-0.3	0.16	0.26	0.69	0.81	0.028	0.23
fat	Q7JVN6	FBgn0037387	CG1213	40728	FALSE	FALSE	30.09	-0.23	0.086	0.18	0.021	0.63	7.7e-05	0.00059	0.00012	0.0021	0.091	1
fat	Q9W092	FBgn0022702	Cht2	38223	FALSE	FALSE	24.02	-0.6	0.26	0.41	0.0028	-1.3	0.021	0.052	0.34	0.52	0.013	0.69
fat	Q9V9T5;Q8I0S9	FBgn0039877	Mccc1	43750	FALSE	FALSE	31.07	0.23	0.021	0.064	0.085	0.75	1.6e-07	5.4e-06	0.0007	0.0071	0.07	0.91
fat	Q9VXM4	FBgn0030703	MSBP	32548	FALSE	TRUE	31.67	-0.22	0.038	0.099	0.052	-0.19	0.078	0.15	0.8	0.88	0.036	0.023
fat	Q9VCV9	FBgn0039008	CG6972	42684	FALSE	FALSE	24.03	2	0.0019	0.0099	0.31	1.7	0.0083	0.025	0.63	0.77	0.7	0.52
fat	Q9VYW6	FBgn0030318	rho-4	32109	FALSE	FALSE	25.7	0.54	0.0024	0.012	0.28	-0.31	0.06	0.12	0.001	0.0092	0.33	0.98
fat	Q03017-2;Q03017	FBgn0000250	cact	34969	FALSE	FALSE	27.79	-0.44	0.0037	0.017	0.24	-0.14	0.31	0.43	0.12	0.26	0.51	0.43
fat	Q8MLQ5;Q9W1G5;Q9W1G6;Q8MKK5	FBgn0261794	kcc	37800	FALSE	FALSE	28.1	-0.44	0.009	0.033	0.15	-0.65	0.00041	0.0022	0.33	0.51	0.027	0.27
fat	Q95RN0-2;Q95RN0	FBgn0038013	CG10038	41495	FALSE	FALSE	29.57	0.27	0.031	0.085	0.063	0.44	0.0014	0.006	0.32	0.5	0.69	0.15
fat	Q9VUN8	FBgn0036501	CG7272	39670	FALSE	FALSE	24.15	0.79	0.042	0.11	0.048	0.92	0.02	0.049	0.8	0.88	0.18	0.34
fat	Q9VQ26	FBgn0051935	CG31935	33338	FALSE	FALSE	26.15	-2.5	0.00011	0.001	0.62	-3.7	9.3e-07	2.1e-05	0.11	0.24	0.34	0.88
fat	Q9VIW8	FBgn0032780	CG13085	35219	FALSE	FALSE	28.87	-0.77	0.012	0.041	0.13	-0.31	0.28	0.39	0.25	0.42	0.039	0.62
fat	Q9VBU4	FBgn0039305	CG11858	43044	FALSE	FALSE	26.95	0.44	0.038	0.098	0.055	1.2	6.3e-06	8.6e-05	0.0099	0.046	0.49	0.94
fat	P55162	FBgn0011771	Hem	40462	FALSE	FALSE	27.64	-0.32	0.026	0.075	0.075	-0.0013	0.99	0.99	0.11	0.23	0.35	0.44
fat	Q9VI04	FBgn0037513	pyd3	40916	FALSE	FALSE	31.85	0.12	0.23	0.37	0.0042	0.37	0.0013	0.0055	0.085	0.2	0.063	0.25
fat	O16043	FBgn0022893	Df31	35418	TRUE	FALSE	29.15	2.1	2.3e-07	8.5e-06	0.95	-0.41	0.14	0.23	2.3e-06	0.00012	0.16	1
fat	Q7KM15	FBgn0000181	bic	45827	FALSE	FALSE	33.23	0.12	0.2	0.34	0.0056	-0.16	0.095	0.17	0.043	0.13	0.2	0.33
fat	Q9VCY1	FBgn0038989	CG6937	42662	FALSE	FALSE	26.69	1.5	0.023	0.067	0.086	-0.26	0.66	0.75	0.052	0.15	0.0065	0.94
fat	Q9W1C9	FBgn0011695	EbpIII	49821	FALSE	FALSE	33.43	-0.59	0.00021	0.0018	0.56	0.21	0.12	0.21	0.00033	0.004	0.51	0.99
fat	A1Z6Z3;Q7JR61;A1Z6Z4;A4UZ69;Q8T0K8	FBgn0010548	Aldh-III	45398	FALSE	TRUE	32.95	-0.25	0.00023	0.0019	0.55	-0.26	0.00018	0.0012	0.94	0.96	0.42	0.00019
fat	Q24524;A4V441	FBgn0003447	sn	31717	TRUE	FALSE	24.24	1.5	0.00095	0.0057	0.4	-0.55	0.17	0.27	0.0013	0.011	0.13	1
fat	O18405	FBgn0019925	Surf4	41864	FALSE	FALSE	27.81	-0.47	0.014	0.047	0.12	-0.16	0.36	0.48	0.22	0.39	0.057	0.45
fat	A8DYC5;A8DYC4	FBgn0085468	ND-MWFE	5740593	FALSE	FALSE	28.72	-0.32	0.072	0.16	0.029	-0.11	0.54	0.64	0.38	0.55	0.029	0.3
fat	Q9VFN9	FBgn0038196	CG9922	41708	TRUE	FALSE	27.63	0.51	0.0039	0.018	0.24	-0.46	0.0071	0.022	0.00029	0.0037	0.55	1
fat	Q9VYG8	FBgn0030451	CG15717	32262	FALSE	FALSE	30.2	0.24	0.0013	0.0074	0.37	0.9	4.6e-11	8.4e-09	9.5e-07	7e-05	0.6	1
fat	Q9W3E7	FBgn0014466	Cp7Fc	31786	TRUE	FALSE	24.47	1.3	0.0072	0.028	0.18	-2.2	9e-05	0.00066	2.2e-05	0.00059	0.18	1
fat	Q9VQI6	FBgn0031478	CG8814	33492	FALSE	FALSE	28.31	0.32	0.01	0.037	0.15	-0.078	0.5	0.61	0.022	0.081	0.13	0.65
fat	Q9VZE6	FBgn0035524	CG11583	326206	FALSE	FALSE	27.65	-0.43	0.0021	0.011	0.31	-0.96	2.4e-07	7.3e-06	0.0054	0.03	0.06	0.87
fat	P45437	FBgn0008635	betaCOP	32820	FALSE	FALSE	30	-0.3	0.0019	0.01	0.32	-0.05	0.55	0.66	0.046	0.14	0.66	0.23
fat	Q9VTZ7	FBgn0036301	CG4069	39437	TRUE	FALSE	26.95	0.76	0.00021	0.0018	0.57	-1.1	3.9e-06	5.8e-05	3.2e-07	3.6e-05	0.024	1
fat	Q9W0S7	FBgn0035121	Tudor-SN	38045	FALSE	TRUE	34.03	-0.17	0.0052	0.022	0.22	-0.23	0.0005	0.0026	0.46	0.63	0.31	0.00088
fat	Q8SYP9	FBgn0044510	mRpS5	3355089	FALSE	TRUE	27.46	-0.45	0.00021	0.0018	0.57	-0.36	0.0014	0.006	0.54	0.7	0.72	0.037
fat	Q9VAS7	FBgn0265274	Inx3	44266	FALSE	FALSE	28.8	-0.32	0.026	0.075	0.081	-0.44	0.0037	0.013	0.52	0.68	0.0016	0.13
fat	Q961R8;Q9VUK8	FBgn0027088	GlyRS	39644	FALSE	TRUE	31.76	0.28	0.0016	0.0087	0.35	0.16	0.05	0.1	0.26	0.44	0.02	0.025
fat	Q9VLS9	FBgn0031987	CG12375	34106	FALSE	FALSE	31.6	0.14	0.076	0.17	0.029	0.11	0.15	0.25	0.79	0.88	0.031	0.0048
fat	O02649;Q9VPS5	FBgn0015245	Hsp60A	32045	FALSE	FALSE	34.87	0.37	0.00039	0.0029	0.51	-0.12	0.18	0.28	0.00075	0.0074	0.12	0.88
fat	Q9VWU1	FBgn0030926	psh	32832	FALSE	FALSE	25.79	-0.74	0.0035	0.016	0.26	-0.14	0.54	0.65	0.068	0.17	0.14	0.79
fat	Q9VG40	FBgn0038076	Cyp313a4	41563	FALSE	FALSE	25.47	-2	0.00046	0.0033	0.49	-0.45	0.35	0.46	0.031	0.1	0.65	0.96
fat	Q9VMR8	FBgn0031701	TotM	33764	FALSE	FALSE	25.76	-1.7	0.028	0.08	0.078	1.2	0.12	0.21	0.011	0.049	0.0043	0.99
fat	Q7K569	FBgn0022160	Gpo1	47611	FALSE	TRUE	34.78	-0.32	0.00025	0.002	0.56	-0.37	4e-05	0.00035	0.55	0.71	0.54	0.005
fat	Q9W301;Q8IRM2	FBgn0030164	CG1889	31928	FALSE	FALSE	27.27	-0.18	0.23	0.37	0.0051	0.34	0.026	0.062	0.018	0.071	0.092	0.81
fat	Q9W391-2;B7Z134;Q9W391;Q6IDE0;Q1RL11	FBgn0030087	CG7766	31839	FALSE	TRUE	31.09	0.48	9.7e-05	0.00095	0.66	0.64	3.4e-06	5.3e-05	0.26	0.43	0.84	0.099
fat	Q9VC63;Q9VL32	FBgn0039207	CG5789	42928	FALSE	FALSE	28.71	-0.28	0.013	0.044	0.14	-0.61	1.4e-05	0.00015	0.038	0.12	0.4	0.46
fat	Q8SWX4	FBgn0051343	CG31343	326133	FALSE	FALSE	24.33	1.3	0.055	0.13	0.042	-0.78	0.24	0.35	0.033	0.11	0.3	0.97
fat	Q9VJ86	FBgn0032679	bsf	35100	FALSE	FALSE	32.06	-0.099	0.042	0.11	0.056	-0.44	2e-08	1e-06	5.9e-05	0.0012	0.063	0.47
fat	Q9VPJ7	FBgn0031220	CG4822	33170	FALSE	FALSE	25.61	-1	0.013	0.043	0.14	-0.091	0.8	0.86	0.092	0.21	0.04	0.86
fat	Q9VWE7	FBgn0031051	Ranbp21	32970	TRUE	FALSE	25.73	1.1	0.0025	0.012	0.31	-1	0.006	0.019	0.00019	0.0027	0.075	1
fat	Q8IR95	FBgn0052667	ssp7	318146	FALSE	FALSE	24.61	-1.5	0.023	0.068	0.095	-0.12	0.84	0.89	0.12	0.26	0.017	0.88
fat	Q8IMF5;P23226;P23226-3	FBgn0002645	Map205	43765	FALSE	FALSE	32.73	0.5	3.6e-07	1.1e-05	0.95	0.83	2.1e-10	2.9e-08	0.0023	0.017	0.55	0.42
fat	Q7K527	FBgn0033134	Tsp42El	35622	FALSE	FALSE	25.44	-0.92	0.0052	0.022	0.23	-0.53	0.082	0.15	0.35	0.53	0.34	0.55
fat	Q8IRE3;Q9VZT1	FBgn0035416	gry	38391	FALSE	FALSE	24.19	-1.1	0.017	0.054	0.12	-0.45	0.29	0.41	0.29	0.46	0.7	0.69
fat	Q9VBP6	FBgn0039349	Ssadh	43092	FALSE	FALSE	31.26	0.25	0.0094	0.034	0.17	-0.0099	0.91	0.94	0.046	0.14	0.85	0.24
fat	Q9VSS2	FBgn0035947	Srp68	39028	FALSE	TRUE	30.67	-0.37	0.0011	0.0066	0.4	-0.29	0.0071	0.022	0.56	0.72	0.57	0.034
fat	Q9VYQ5	FBgn0030369	Cyp318a1	32172	FALSE	FALSE	25.4	-0.41	0.079	0.17	0.029	-0.83	0.0013	0.0057	0.19	0.35	0.057	0.6
fat	Q7K0B6	FBgn0050000	GstT1	35995	FALSE	TRUE	31.22	0.42	0.00034	0.0026	0.54	0.44	0.00019	0.0012	0.85	0.91	0.41	0.015
fat	Q9VQT8	FBgn0031561	IM33	33592	TRUE	FALSE	29.37	-1.2	8.2e-06	0.00014	0.84	0.87	0.00038	0.0021	7.2e-07	5.5e-05	0.086	1
fat	Q9W1N3	FBgn0034877	levy	37728	FALSE	FALSE	33.03	0.3	0.0062	0.025	0.21	0.12	0.22	0.33	0.21	0.38	0.1	0.13
fat	Q8SYQ4	FBgn0051997	CG31997	319064	FALSE	FALSE	28.44	0.17	0.29	0.44	0.0031	0.31	0.061	0.12	0.53	0.69	0.03	0.19
fat	Q95SP2	FBgn0039875	sip3	43747	FALSE	FALSE	24.16	0.22	0.54	0.67	0.00035	1.9	4.9e-05	0.00041	0.0039	0.024	0.063	0.99
fat	Q9VFS8	FBgn0038166	CG9588	41672	FALSE	TRUE	28.95	0.22	0.014	0.047	0.14	0.32	0.00079	0.0037	0.37	0.54	0.39	0.025
fat	P23128;P23128-2	FBgn0004419	me31B	34364	TRUE	FALSE	32.43	0.91	3.2e-05	0.0004	0.76	-0.67	0.00081	0.0038	2.7e-06	0.00013	0.26	1
fat	Q8IR72	FBgn0052638	CG32638	318133	FALSE	FALSE	26.62	0.33	0.005	0.021	0.24	-0.079	0.46	0.57	0.012	0.052	0.11	0.69
fat	Q9VFS1	FBgn0038172	Adgf-D	41679	FALSE	FALSE	25.77	0.3	0.1	0.21	0.021	0.68	0.0011	0.0051	0.14	0.29	0.064	0.56
fat	Q7K3Z8	FBgn0032029	CG17292	34152	FALSE	FALSE	28.66	-0.54	0.0076	0.029	0.2	-0.29	0.13	0.22	0.33	0.51	0.23	0.37
fat	Q9VBG6	FBgn0039417	CG6073	43180	FALSE	FALSE	26.7	-0.75	0.065	0.15	0.038	-0.65	0.11	0.19	0.85	0.91	0.0043	0.33
fat	Q9VL92	FBgn0015035	Cyp4e3	34291	FALSE	FALSE	26.66	-0.26	0.21	0.35	0.0069	-0.16	0.43	0.54	0.73	0.84	0.12	0.2
fat	Q9VW19	FBgn0036891	CG9372	40137	FALSE	FALSE	27.14	-0.31	0.084	0.18	0.029	-0.55	0.0041	0.014	0.31	0.49	0.04	0.35
fat	Q0E8C8	FBgn0262057	Spn77Ba	40234	FALSE	FALSE	30.04	-0.34	0.0035	0.016	0.28	-0.0045	0.96	0.97	0.03	0.1	0.23	0.47
fat	A1Z8H4	FBgn0033600	Cpr47Ec	36191	FALSE	FALSE	24.44	-1	0.005	0.021	0.24	-2.1	4e-06	5.9e-05	0.029	0.099	0.55	0.94
fat	Q7K1C0	FBgn0031228	ND-15	33179	FALSE	FALSE	30.32	-0.41	0.0081	0.031	0.19	0.2	0.16	0.26	0.0058	0.032	0.075	0.91
fat	P61209	FBgn0010348	Arf79F	40506	FALSE	TRUE	31.68	-0.28	0.02	0.061	0.11	-0.15	0.17	0.27	0.43	0.6	0.053	0.085
fat	Q9VV95	FBgn0036656	CG13026	39868	TRUE	FALSE	24.41	-2.8	1.3e-05	0.0002	0.82	-0.61	0.21	0.32	0.0041	0.025	0.74	0.99
fat	Q9VNC3	FBgn0037332	Hcs	40659	TRUE	FALSE	23.91	1.9	2.9e-05	0.00037	0.77	0.17	0.64	0.73	0.0021	0.016	0.91	1
fat	Q7K3J0	FBgn0033342	CCT8	35882	FALSE	FALSE	32.24	0.36	0.0038	0.017	0.27	-0.32	0.0091	0.027	0.00034	0.0041	0.049	0.98
fat	Q9VZH5	FBgn0035501	CG1299	38496	FALSE	FALSE	29.09	-0.27	0.037	0.097	0.069	-0.43	0.002	0.0077	0.34	0.52	0.092	0.15
fat	Q9VFZ4	FBgn0038115	CG7966	41610	FALSE	FALSE	30.28	0.29	0.0035	0.016	0.28	0.52	9.8e-06	0.00012	0.068	0.17	0.36	0.19
fat	Q9VSX2	FBgn0035982	CG4461	39074	FALSE	TRUE	28.99	-0.46	0.00087	0.0054	0.45	-0.37	0.005	0.017	0.58	0.73	0.34	0.073
fat	Q9VQ84;Q9VQ83	FBgn0031395	CG10874	33394	FALSE	FALSE	24.57	0.42	0.11	0.22	0.021	-1.1	0.0003	0.0017	0.00039	0.0046	0.015	1
fat	Q9VS11	FBgn0035734	CG14823	38772	FALSE	FALSE	24.27	1.3	0.0033	0.016	0.29	0.27	0.5	0.61	0.073	0.18	0.023	0.89
fat	Q9VVA4;Q7KUQ2	FBgn0036663	CG9674	39878	FALSE	TRUE	33.18	-0.17	0.0039	0.018	0.27	-0.059	0.28	0.39	0.14	0.29	0.85	0.0038
fat	Q961Q8	FBgn0039326	CG10562	43066	FALSE	FALSE	29.56	-0.82	1e-07	4.9e-06	0.97	-0.36	0.0015	0.0061	0.0032	0.021	0.43	0.81
fat	P17917	FBgn0005655	PCNA	37290	TRUE	FALSE	28.12	2.2	0.00014	0.0013	0.64	-0.5	0.3	0.41	0.0006	0.0062	0.22	1
fat	Q9I7T7-2;Q9I7T7;Q9I7T7-3	FBgn0035424	CG11505	38399	FALSE	FALSE	26.86	0.61	0.0026	0.013	0.32	0.25	0.17	0.27	0.16	0.31	0.67	0.53
fat	P48554	FBgn0014011	Rac2	38831	FALSE	FALSE	28.89	-0.27	0.055	0.13	0.048	0.32	0.027	0.063	0.0056	0.031	0.12	0.9
fat	O44081;E1JGV6;O44081-2	FBgn0259937	Nop60B	37873	FALSE	FALSE	30.85	0.37	0.017	0.055	0.13	-0.31	0.038	0.083	0.0029	0.02	0.017	0.95
fat	Q8IMV6;Q9VC33;Q7K1P7	FBgn0039229	Saf-B	42958	FALSE	FALSE	26.89	-0.42	0.0036	0.017	0.29	-0.73	1.7e-05	0.00018	0.094	0.22	0.1	0.44
fat	Q9W2U8	FBgn0083167	Neb-cGP	50417	FALSE	FALSE	30.76	0.51	0.018	0.057	0.12	-0.07	0.72	0.8	0.051	0.15	0.046	0.8
fat	Q9VGZ3	FBgn0024957	Irp-1B	41269	FALSE	FALSE	35.86	-0.12	0.023	0.069	0.1	0.33	2.4e-06	4.2e-05	3.8e-06	0.00016	0.34	0.93
fat	Q24491	FBgn0011305	Rsf1	34370	FALSE	FALSE	25.52	0.35	0.03	0.083	0.085	0.09	0.55	0.66	0.23	0.41	0.48	0.35
fat	O77134	FBgn0038224	ATPsynE	41745	FALSE	FALSE	32.14	0.32	0.09	0.19	0.028	-0.44	0.025	0.06	0.0079	0.04	0.02	0.94
fat	Q9VM12	FBgn0031913	CG5958	34022	FALSE	FALSE	34.7	-0.15	0.063	0.15	0.043	0.09	0.24	0.35	0.037	0.12	0.011	0.17
fat	Q9W335	FBgn0028327	l(1)G0320	326234	FALSE	FALSE	32.33	-0.26	0.034	0.092	0.076	-0.03	0.79	0.85	0.17	0.33	0.019	0.24
fat	Q8MSR2;Q7KTI1;Q9VLM4;Q9VLM3	FBgn0032036	CG13384	34160	FALSE	FALSE	25.91	-0.75	0.012	0.042	0.16	-1	0.0012	0.0051	0.46	0.62	0.89	0.45
fat	Q9VXI6;Q9VAW7	FBgn0030733	UQCR-14	32586	FALSE	FALSE	32.48	-0.33	0.019	0.059	0.12	0.29	0.036	0.08	0.0031	0.021	0.046	0.93
fat	A8DYV9	FBgn0085209	CG34180	5740541	FALSE	FALSE	28.17	0.23	0.16	0.29	0.012	0.32	0.054	0.11	0.68	0.8	0.076	0.14
fat	Q9VK59	FBgn0032454	CG5787	34684	FALSE	TRUE	27.98	-0.32	0.014	0.046	0.15	-0.4	0.0033	0.012	0.65	0.78	0.11	0.068
fat	Q9XZ01	FBgn0027570	Nep2	40588	FALSE	FALSE	26.68	0.12	0.47	0.61	0.00078	-0.72	0.0003	0.0017	0.0017	0.013	0.038	0.98
fat	Q9VV21	FBgn0036597	CG4962	39793	FALSE	FALSE	28.98	-0.57	0.00068	0.0044	0.49	0.13	0.35	0.47	0.0022	0.016	0.33	0.96
fat	Q9VU68;Q9VU68-2	FBgn0260049	flr	39505	FALSE	TRUE	32.36	-0.16	0.024	0.07	0.1	-0.037	0.57	0.67	0.2	0.36	0.019	0.013
fat	P07188	FBgn0002534	Lcp3	35819	FALSE	FALSE	24.18	2.5	6.4e-05	0.00067	0.72	2.1	0.00041	0.0022	0.55	0.7	0.38	0.54
fat	Q9I7D3	FBgn0042134	Capr	59172	TRUE	FALSE	30.8	0.75	4.4e-07	1.3e-05	0.95	-0.31	0.0052	0.017	4.5e-07	4.5e-05	0.53	1
fat	Q8INB6;Q86BR9;Q86NK8;Q4AB31;Q8IHB0;Q9VEX2;Q59DW8	FBgn0250823	gish	49701	FALSE	TRUE	28.36	-0.36	4.1e-05	0.00047	0.76	-0.23	0.0025	0.0095	0.2	0.36	0.82	0.017
fat	Q9W3H5	FBgn0030025	CG2147	31759	FALSE	FALSE	24.58	1.7	0.0026	0.013	0.33	-0.17	0.74	0.81	0.014	0.06	0.062	0.98
fat	Q9I7R0	FBgn0042138	CG18815	59176	FALSE	FALSE	32.67	0.084	0.36	0.51	0.0021	0.25	0.012	0.034	0.21	0.38	0.025	0.089
fat	Q24368	FBgn0011604	Iswi	36390	FALSE	FALSE	25.58	0.44	0.003	0.015	0.32	0.24	0.076	0.15	0.29	0.46	0.12	0.22
fat	Q8IN51	FBgn0051205	CG31205	318626	FALSE	FALSE	27.3	-0.14	0.23	0.37	0.0067	-0.26	0.028	0.065	0.43	0.61	0.19	0.092
fat	Q7KSE8;Q8IN94;E1JIN6	FBgn0261885	osa	42130	FALSE	FALSE	24.64	0.2	0.3	0.45	0.0034	-0.17	0.39	0.5	0.19	0.35	0.15	0.53
fat	Q9VV72	FBgn0026061	Mipp1	39841	FALSE	FALSE	30.82	-0.52	0.00031	0.0024	0.58	-0.31	0.015	0.039	0.22	0.4	0.89	0.21
fat	Q8IH56;Q4U2G8	FBgn0034436	CG11961	37221	TRUE	FALSE	25.65	-0.79	0.00034	0.0026	0.57	0.44	0.024	0.057	0.00013	0.0021	0.46	1
fat	Q9W401;Q9W401-2	FBgn0261955	kdn	31579	FALSE	FALSE	35.65	0.045	0.56	0.7	0.00037	0.21	0.014	0.038	0.15	0.3	0.0057	0.058
fat	Q9VTZ6	FBgn0036300	Pmm2	39436	FALSE	FALSE	30.43	0.039	0.63	0.75	0.00019	0.5	8.1e-06	0.00011	0.00078	0.0076	0.063	0.85
fat	Q9VH07	FBgn0040078	pont	53439	TRUE	FALSE	29.91	0.27	0.0099	0.036	0.19	-0.64	2.5e-06	4.3e-05	2.3e-06	0.00012	0.016	1
fat	Q7K036	FBgn0033357	Tom7	35899	FALSE	FALSE	26.23	-1.5	0.12	0.23	0.021	-1.7	0.081	0.15	0.88	0.93	0.13	0.46
fat	A1Z7M8	FBgn0033366	Ance-4	35909	FALSE	FALSE	24.3	-0.8	0.0074	0.029	0.22	0.17	0.52	0.63	0.018	0.071	0.094	0.95
fat	P12881	FBgn0250843	Prosalpha6	34359	FALSE	TRUE	32.86	0.35	2e-05	0.00028	0.82	0.29	0.00017	0.0011	0.48	0.65	0.8	0.0022
fat	Q8IR39;P30189;Q494M1	FBgn0004924	Top1	32458	FALSE	FALSE	27.06	-0.44	0.0054	0.023	0.26	-0.63	0.00023	0.0014	0.32	0.51	0.18	0.23
fat	Q8MSG8-3;Q8MSG8-2;Q8MSG8	FBgn0038704	CG5316	42322	FALSE	FALSE	23.93	-1.1	0.081	0.17	0.036	-1.1	0.082	0.15	1	1	0.11	0.34
fat	Q9W4L1	FBgn0040907	mRpL33	50381	FALSE	FALSE	25.47	0.59	0.17	0.3	0.012	0.55	0.21	0.31	0.94	0.97	0.14	0.31
fat	Q9VKY3	FBgn0032229	CG5045	34402	FALSE	FALSE	30.48	-0.15	0.41	0.56	0.0015	-0.39	0.05	0.1	0.38	0.56	0.0015	0.34
fat	Q9VP06	FBgn0037108	Alg11	40402	FALSE	FALSE	25.31	-0.55	0.14	0.26	0.018	-1.7	0.00019	0.0012	0.04	0.12	0.14	0.93
fat	Q9VG51	FBgn0038065	Snx3	41551	FALSE	FALSE	29.37	0.1	0.14	0.27	0.016	0.051	0.46	0.58	0.59	0.74	0.02	0.0042
fat	Q9VH01	FBgn0266717	Bruce	41260	FALSE	FALSE	26.23	0.52	0.016	0.052	0.15	1.4	8.4e-07	2e-05	0.0036	0.023	0.86	0.98
fat	Q7JRC0	FBgn0033624	CG12384	36224	FALSE	FALSE	31.83	-0.18	0.026	0.075	0.11	0.4	3.7e-05	0.00033	2.9e-05	0.00073	0.065	0.98
fat	Q9VAI3	FBgn0042213	CG18731	59246	FALSE	FALSE	23.35	1.8	0.0051	0.022	0.27	2	0.0023	0.0087	0.8	0.88	0.39	0.44
fat	Q9VE01	FBgn0038680	Cyp12a5	42293	FALSE	FALSE	29.61	-0.2	0.078	0.17	0.039	-0.065	0.54	0.65	0.39	0.56	0.27	0.087
fat	Q9VB83	FBgn0039479	CG14257	43257	FALSE	FALSE	26.25	-0.29	0.24	0.39	0.0064	-0.22	0.37	0.49	0.84	0.9	0.31	0.22
fat	Q9VHV2;E1JJ89	FBgn0037553	CG18249	40964	FALSE	FALSE	24.92	-0.6	0.038	0.098	0.08	-0.032	0.91	0.94	0.15	0.3	0.03	0.72
fat	P40304	FBgn0002284	Prosbeta6	39855	FALSE	TRUE	32.44	0.22	0.0032	0.015	0.33	0.1	0.13	0.22	0.21	0.38	0.69	0.012
fat	Q9VYA7	FBgn0030504	CG2691	32320	FALSE	FALSE	26.21	-0.53	0.028	0.08	0.1	-0.35	0.13	0.22	0.58	0.73	0.023	0.31
fat	Q9I7K3	FBgn0037818	CG6465	41274	FALSE	FALSE	27.72	-0.89	2.5e-05	0.00032	0.81	-0.067	0.67	0.76	0.0017	0.013	0.43	0.98
fat	Q9VEV5	FBgn0038426	mRpS33	41991	FALSE	FALSE	25.36	-1.2	0.0029	0.014	0.34	-0.33	0.33	0.45	0.099	0.23	0.51	0.84
fat	Q8IMU2;Q8SWX6	FBgn0039265	CG11790	42999	FALSE	FALSE	27.92	0.18	0.092	0.19	0.033	0.14	0.18	0.29	0.78	0.87	0.44	0.026
fat	O76454	FBgn0024841	Pcd	43499	FALSE	FALSE	31.98	-0.23	0.21	0.35	0.0095	0.75	0.00051	0.0027	0.001	0.0092	0.035	0.99
fat	P34739	FBgn0002542	lds	45894	FALSE	FALSE	24.15	1.5	0.0073	0.029	0.23	-0.12	0.81	0.87	0.033	0.11	0.04	0.96
fat	Q500Y7	FBgn0034245	UQCR-6.4	36991	FALSE	FALSE	32.63	0.3	0.067	0.15	0.048	0.39	0.021	0.051	0.68	0.8	0.056	0.13
fat	A1Z8N1;Q8MKK4-2;Q8MKK4	FBgn0050035	Tret1-1	36248	FALSE	FALSE	30.04	0.61	0.035	0.093	0.088	1.7	4.3e-06	6.3e-05	0.0078	0.039	0.18	0.97
fat	Q9VZU7	FBgn0035402	Usp5	38375	FALSE	TRUE	31.51	0.21	0.011	0.038	0.19	0.18	0.028	0.066	0.75	0.85	0.11	0.0044
fat	Q9VN45	FBgn0037265	spartin	40582	FALSE	FALSE	26.11	-0.79	0.0076	0.03	0.23	-1	0.001	0.0046	0.52	0.69	0.097	0.39
fat	Q9VF89	FBgn0038319	mRpL9	41859	FALSE	TRUE	26.72	-0.38	0.016	0.051	0.16	-0.42	0.0079	0.024	0.82	0.9	0.73	0.078
fat	Q8IQ82;Q8IQ80	FBgn0035770	pst	38818	TRUE	FALSE	30.04	-0.46	0.0014	0.0078	0.44	0.5	0.00072	0.0035	3e-05	0.00075	0.28	1
fat	Q7JR71;Q95T42;Q0E9C3	FBgn0033631	Sod3	36232	FALSE	FALSE	28.42	-0.48	0.023	0.069	0.12	-1	6.7e-05	0.00053	0.073	0.18	0.054	0.75
fat	Q9VWI3	FBgn0044030	mRpS14	117414	FALSE	FALSE	25.82	-0.55	0.003	0.014	0.34	-0.17	0.3	0.42	0.11	0.24	0.32	0.57
fat	P22977	FBgn0000356	Cp16	39001	FALSE	FALSE	29.71	1.7	0.05	0.12	0.065	-3.8	0.00018	0.0012	0.00015	0.0023	0.7	1
fat	Q9VZ82	FBgn0027085	LeuRS-m	38581	FALSE	FALSE	24.5	-0.25	0.42	0.57	0.0016	0.65	0.046	0.097	0.05	0.14	0.023	0.9
fat	Q7KUE6	FBgn0053493	CG33493	2768994	FALSE	FALSE	24.64	-0.71	0.21	0.35	0.0096	2.2	0.00086	0.004	0.0015	0.012	0.52	1
fat	Q9VYX8	FBgn0030309	CG1572	32098	FALSE	TRUE	29.19	0.33	0.014	0.047	0.17	0.29	0.027	0.063	0.83	0.9	0.32	0.046
fat	Q8SXQ1	FBgn0036857	CG9629	40097	FALSE	TRUE	33.4	0.18	0.0095	0.035	0.21	0.058	0.35	0.47	0.19	0.35	0.062	0.0089
fat	Q7JUV6;B7YZK8	FBgn0265356	tn	37190	FALSE	FALSE	24.41	1.6	0.0019	0.01	0.4	-0.32	0.47	0.58	0.0063	0.034	0.2	0.99
fat	Q9XZ32	FBgn0027512	CG10254	42793	TRUE	FALSE	24.28	1.1	0.031	0.086	0.1	-3.4	1.1e-06	2.4e-05	2.7e-06	0.00013	0.065	1
fat	O97182	FBgn0001961	Arpc1	34793	FALSE	FALSE	29.24	-0.24	0.04	0.1	0.082	0.087	0.44	0.55	0.048	0.14	0.79	0.47
fat	Q9VZ01	FBgn0030292	CG11752	32076	FALSE	FALSE	31.2	-0.077	0.48	0.62	0.00099	0.45	0.00056	0.0029	0.0028	0.019	0.0043	0.88
fat	Q9VGF3	FBgn0037973	CG18547	41452	TRUE	FALSE	30.7	-0.23	0.035	0.093	0.093	0.66	4.5e-06	6.5e-05	8e-06	0.00028	0.51	1
fat	Q9VXR9	FBgn0030668	CG8128	32504	FALSE	FALSE	30.06	0.2	0.038	0.098	0.088	-0.069	0.44	0.55	0.046	0.14	0.041	0.27
fat	Q9VA97	FBgn0039751	CG1983	43588	FALSE	FALSE	29.57	-0.13	0.12	0.23	0.025	0.21	0.013	0.035	0.0062	0.033	0.14	0.5
fat	Q9W3M4	FBgn0027280	l(1)G0193	31712	FALSE	FALSE	26.99	0.18	0.25	0.4	0.007	0.13	0.4	0.52	0.82	0.9	0.4	0.1
fat	Q9VRV1	FBgn0035688	fmt	38714	FALSE	FALSE	27.76	0.34	0.023	0.069	0.13	0.17	0.22	0.33	0.4	0.57	0.036	0.19
fat	Q9VGC2	FBgn0037999	CG4860	41480	FALSE	FALSE	27.47	0.66	0.0019	0.01	0.4	0.63	0.0027	0.01	0.91	0.95	0.78	0.12
fat	Q7KVI9;Q9W1Q4	FBgn0034860	CG9812	37709	FALSE	FALSE	31.29	0.31	0.056	0.13	0.062	0.016	0.92	0.94	0.19	0.35	0.24	0.42
fat	Q86B47-2;Q86B47	FBgn0027602	CG8611	32725	FALSE	FALSE	23.88	-0.83	0.04	0.1	0.085	-2.2	2e-05	0.00021	0.022	0.083	0.026	0.96
fat	Q9VES7	FBgn0038449	CG17562	42021	FALSE	FALSE	29.05	-0.38	0.0084	0.032	0.23	-0.61	0.00019	0.0012	0.24	0.41	0.12	0.26
fat	Q01637	FBgn0003257	r-l	42493	FALSE	FALSE	29.36	0.26	0.027	0.077	0.12	-0.45	0.00071	0.0034	0.00024	0.0032	0.012	0.99
fat	Q9VE11	FBgn0038673	CG14286	42280	FALSE	FALSE	25.37	0.98	0.00064	0.0043	0.54	0.4	0.11	0.19	0.1	0.23	0.13	0.76
fat	O46036-2;A4V2S3	FBgn0020496	CtBP	41602	FALSE	TRUE	30.5	-0.38	0.0011	0.0065	0.48	-0.43	0.00038	0.0021	0.73	0.84	0.56	0.024
fat	Q9VKM7;Q9VKM8	FBgn0053129	CG33129	34514	FALSE	FALSE	31.77	0.36	0.0033	0.016	0.34	0.11	0.32	0.43	0.11	0.25	0.65	0.27
fat	Q9VEQ2;Q9VEQ1	FBgn0038461	CG3678	42045	FALSE	FALSE	28.51	-0.34	0.058	0.14	0.061	-0.95	2.6e-05	0.00025	0.02	0.077	0.34	0.86
fat	Q8IQZ1	FBgn0052495	Gss2	318053	FALSE	FALSE	28.19	-0.6	0.012	0.041	0.2	-1.2	3.6e-05	0.00033	0.075	0.19	0.14	0.77
fat	A1Z814;E1JH23	FBgn0033463	CG1513	36028	FALSE	FALSE	27.54	-0.19	0.033	0.089	0.1	-0.47	2e-05	0.0002	0.025	0.089	0.86	0.3
fat	P13709-2;E1JJJ8;P13709	FBgn0004656	fs(1)h	31722	FALSE	FALSE	26.19	-0.72	0.0012	0.0068	0.47	-0.59	0.0051	0.017	0.64	0.78	0.43	0.21
fat	P45594	FBgn0011726	tsr	37841	FALSE	TRUE	33.38	0.28	0.0013	0.0074	0.46	0.26	0.0028	0.01	0.81	0.89	0.27	0.004
fat	Q9VMW8	FBgn0031662	CG3792	33717	FALSE	FALSE	25.17	0.45	0.19	0.33	0.013	-0.49	0.15	0.25	0.06	0.16	0.45	0.89
fat	Q9VL06	FBgn0032208	Ufd4	34378	FALSE	FALSE	25.7	0.38	0.087	0.18	0.04	-0.48	0.033	0.074	0.0093	0.044	1	0.95
fat	Q8IMM1;Q9VAU1;E1JJ08	FBgn0039594	CG9990	43391	FALSE	FALSE	26.4	-1.3	0.00015	0.0013	0.7	-0.16	0.57	0.67	0.0079	0.04	0.4	0.98
fat	O77436	FBgn0025620	CG13360	31025	FALSE	FALSE	24.85	-1.1	0.12	0.23	0.027	-1.9	0.0096	0.028	0.38	0.56	0.076	0.7
fat	A1ZA83	FBgn0034066	CG8397	36767	FALSE	FALSE	27.73	0.28	0.036	0.094	0.097	-0.26	0.052	0.11	0.0065	0.035	0.19	0.86
fat	Q9W229	FBgn0261596	RpS24	37589	FALSE	FALSE	32.77	0.22	0.085	0.18	0.041	0.26	0.043	0.092	0.8	0.88	0.069	0.05
fat	Q9VHV9	FBgn0037548	CG7900	40957	FALSE	FALSE	29.25	-0.15	0.29	0.44	0.0053	-0.5	0.0016	0.0065	0.078	0.19	0.17	0.53
fat	Q9VA36;Q86PF3;Q9Y154;Q9VA35	FBgn0027598	cindr	43654	FALSE	FALSE	28.11	-0.3	0.0073	0.029	0.25	0.3	0.0065	0.02	0.00043	0.0049	0.011	0.96
fat	Q9VLT7	FBgn0031980	RpL36A	34098	FALSE	FALSE	30.18	-1	0.11	0.22	0.03	-0.37	0.55	0.66	0.46	0.63	0.018	0.64
fat	Q9VHJ5	FBgn0037646	CAHbeta	41070	FALSE	FALSE	30.69	0.3	0.0075	0.029	0.25	0.79	3.1e-07	8.9e-06	0.0027	0.019	0.22	0.85
fat	Q9W4K0	FBgn0029709	CHOp24	31382	FALSE	FALSE	29.41	-0.19	0.054	0.13	0.068	0.14	0.15	0.24	0.021	0.079	0.26	0.46
fat	Q9VJ61	FBgn0032702	CG10376	35126	FALSE	FALSE	26.15	0.82	0.00096	0.0058	0.5	0.21	0.32	0.44	0.053	0.15	0.21	0.81
fat	Q9VHL2	FBgn0037632	CCT7	41054	FALSE	FALSE	32.64	0.4	0.00022	0.0018	0.66	-0.13	0.16	0.26	0.00044	0.005	0.049	0.93
fat	Q8IQA1;Q9VSH3	FBgn0035871	BI-1	38936	FALSE	FALSE	23.87	0.56	0.17	0.3	0.016	-0.18	0.66	0.75	0.2	0.37	0.02	0.76
fat	Q27869	FBgn0086768	Pcmt	40668	FALSE	FALSE	28.47	0.062	0.49	0.63	0.0011	0.76	8.9e-08	3.3e-06	2.6e-05	0.00066	0.033	0.99
fat	P36958	FBgn0004855	RpII15	41741	FALSE	FALSE	24.98	-1.5	0.0022	0.011	0.4	-2	0.00015	0.00099	0.4	0.57	0.91	0.62
fat	P41374	FBgn0261609	eIF2alpha	32617	FALSE	FALSE	32	-0.14	0.11	0.22	0.029	0.0086	0.92	0.94	0.23	0.4	0.39	0.062
fat	Q7KN74	FBgn0021847	l(2)k14710	48387	FALSE	FALSE	26.96	0.75	0.024	0.07	0.13	1.2	0.00084	0.0039	0.29	0.47	0.09	0.61
fat	Q7JZB4;E2QCZ9	FBgn0037279	CG1129	40599	FALSE	FALSE	29.71	0.53	0.0037	0.017	0.34	0.25	0.14	0.23	0.23	0.4	0.38	0.4
fat	Q8IRB6;Q0E8H9	FBgn0041630	Hexo1	38528	FALSE	FALSE	25.94	-0.51	0.028	0.079	0.12	0.6	0.012	0.033	0.0018	0.014	0.87	0.99
fat	Q9VVL8	FBgn0036763	TrpRS-m	39989	TRUE	FALSE	27	0.47	0.0026	0.013	0.39	-0.39	0.01	0.029	0.00028	0.0037	0.27	0.99
fat	Q94514	FBgn0019624	COX5A	41432	FALSE	FALSE	34.44	0.11	0.2	0.34	0.012	0.36	0.00039	0.0021	0.045	0.13	0.025	0.22
fat	Q9VCB6;Q7K112;Q8IMX1;Q8IMX0	FBgn0011725	twin	42880	FALSE	FALSE	25.41	-0.56	0.0034	0.016	0.35	-1	7.9e-06	0.0001	0.06	0.16	0.23	0.71
fat	Q9VFJ2	FBgn0038234	mRpL11	41757	FALSE	FALSE	27.18	0.36	0.007	0.028	0.27	-0.2	0.11	0.2	0.0038	0.024	0.023	0.89
fat	Q9VH14;A4V2N5	FBgn0025879	Timp	41248	FALSE	FALSE	25.52	-0.51	0.086	0.18	0.043	-1.2	0.00043	0.0023	0.094	0.22	0.045	0.81
fat	Q06559	FBgn0002622	RpS3	42761	FALSE	TRUE	34.36	-0.16	0.0059	0.024	0.29	-0.32	5e-06	7.1e-05	0.031	0.1	0.16	0.012
fat	P04388	FBgn0003206	Ras64B	38494	FALSE	TRUE	30.11	-0.22	0.03	0.083	0.12	-0.16	0.12	0.2	0.62	0.76	0.39	0.028
fat	A8DYH2	FBgn0085220	Ufm1	5740715	FALSE	FALSE	30.18	0.31	0.075	0.16	0.051	0.81	0.00011	0.00075	0.043	0.13	0.29	0.75
fat	Q9VIK1	FBgn0032880	TM9SF2	35335	FALSE	FALSE	24.73	-1.8	1.1e-05	0.00017	0.88	-1.5	8.5e-05	0.00064	0.49	0.65	0.29	0.45
fat	Q9V406	FBgn0001994	crp	34956	FALSE	FALSE	25	-0.72	0.17	0.3	0.017	-0.39	0.45	0.56	0.65	0.78	0.57	0.49
fat	Q9W0Z1	FBgn0035076	Ance-5	37980	FALSE	FALSE	23.58	0.49	0.32	0.48	0.0045	-0.46	0.35	0.47	0.18	0.34	0.019	0.81
fat	Q7JR49	FBgn0262515	VhaAC45	35944	FALSE	FALSE	28.16	-0.49	0.0018	0.0095	0.44	0.27	0.059	0.12	0.00081	0.0078	0.4	0.98
fat	P91926;P91926-2	FBgn0264855	AP-2alpha	33211	FALSE	TRUE	31.02	-0.28	0.0024	0.012	0.4	-0.18	0.035	0.078	0.39	0.56	0.77	0.021
fat	Q9W478	FBgn0029804	CG3097	31503	FALSE	FALSE	23.95	0.66	0.097	0.2	0.039	0.034	0.93	0.95	0.26	0.43	0.07	0.7
fat	Q9W021	FBgn0035335	mRpL23	38302	FALSE	FALSE	24.7	-2	0.0062	0.025	0.29	-3.2	0.00012	0.00084	0.22	0.39	0.31	0.81
fat	Q9VSY8	FBgn0260859	Bet3	39090	FALSE	FALSE	25.74	0.59	0.18	0.31	0.017	0.13	0.76	0.83	0.45	0.62	0.33	0.58
fat	Q7JZF5	FBgn0033571	Rpb5	36160	TRUE	FALSE	27.47	0.42	0.0052	0.022	0.31	-0.57	0.00041	0.0022	5e-05	0.0011	0.081	1
fat	Q9VLX0	FBgn0025687	LKRSDH	34064	FALSE	TRUE	33.25	0.17	0.03	0.083	0.12	0.18	0.022	0.054	0.91	0.95	0.042	0.0025
fat	Q9VBU7	FBgn0039302	Nup358	43041	FALSE	FALSE	31.72	-0.059	0.34	0.5	0.004	-0.082	0.19	0.3	0.79	0.88	0.056	0.00079
fat	Q9VAY2	FBgn0039562	Gp93	43354	FALSE	FALSE	32.89	-0.18	0.017	0.055	0.17	0.33	0.00017	0.0011	6.3e-05	0.0012	0.96	0.95
fat	Q7K4Q9	FBgn0010611	Hmgs	44154	FALSE	FALSE	31.02	-0.24	0.017	0.054	0.18	0.22	0.026	0.062	0.0022	0.016	0.2	0.81
fat	Q9V3P6;Q9V3P6-2	FBgn0028692	Rpn2	43449	FALSE	FALSE	33.02	0.22	0.0027	0.013	0.39	-0.014	0.82	0.88	0.017	0.069	0.78	0.13
fat	Q7K3Q2	FBgn0038652	CG7720	42257	FALSE	FALSE	25.54	-0.64	0.015	0.05	0.19	0.14	0.56	0.66	0.033	0.11	0.19	0.9
fat	Q9VQF1	FBgn0031449	CG31689	326154	FALSE	FALSE	28.16	-0.47	0.034	0.091	0.11	-1.1	5.7e-05	0.00046	0.051	0.15	0.96	0.81
fat	Q9VK90	FBgn0032429	CG5446	34655	FALSE	FALSE	26.5	-0.49	0.02	0.062	0.16	-0.18	0.35	0.47	0.27	0.45	0.14	0.45
fat	Q7K1U0;A1Z9P8	FBgn0033926	Arc1	36595	FALSE	FALSE	27.39	-1	3.2e-06	6.4e-05	0.93	-0.61	0.0011	0.0049	0.065	0.17	0.27	0.66
fat	Q9I7U1;Q7KV99;Q9I7U2	FBgn0035321	CG1275	38286	FALSE	FALSE	28.76	-0.21	0.26	0.41	0.0082	1.1	4.8e-06	6.8e-05	4.2e-05	0.00095	0.6	1
fat	Q9VDL2;Q86BR8	FBgn0038805	TFAM	42433	FALSE	FALSE	30.1	0.57	3.9e-05	0.00046	0.82	-0.067	0.53	0.64	0.00045	0.0051	0.13	0.97
fat	Q9W3Y3	FBgn0029882	CG3226	31597	FALSE	FALSE	30.49	0.62	0.00011	0.001	0.75	0.12	0.35	0.47	0.011	0.051	0.21	0.81
fat	Q7JV23	FBgn0033246	ACC	35761	FALSE	FALSE	28.52	0.52	0.014	0.047	0.2	1.7	5e-08	2.1e-06	0.00032	0.0039	0.64	1
fat	A8JRB8;A8JRC1;Q8MT18;A8JRC2	FBgn0039358	CG5028	43102	FALSE	TRUE	32.53	-0.28	0.018	0.056	0.18	-0.16	0.16	0.25	0.43	0.6	0.0065	0.083
fat	Q9V7N5-2;Q9V7N5-3;Q9V7N5;B7YZI0	FBgn0262511	Vha44	36826	FALSE	TRUE	32.36	-0.24	0.0033	0.016	0.38	-0.17	0.03	0.069	0.47	0.64	0.87	0.0085
fat	Q8SZM2;Q8IP61	FBgn0032538	CG16885	34811	FALSE	TRUE	33.05	-0.36	0.00078	0.0049	0.55	-0.23	0.018	0.045	0.32	0.5	0.75	0.056
fat	Q7KJ73	FBgn0029506	Tsp42Ee	35614	FALSE	FALSE	28.77	-0.36	0.004	0.018	0.35	-0.19	0.11	0.19	0.26	0.44	0.15	0.16
fat	Q59DP3;Q59DP4;H9XVP9	FBgn0250819	CG33521	3346141	FALSE	FALSE	23.77	-0.92	0.12	0.23	0.033	-0.48	0.4	0.51	0.58	0.73	0.0074	0.55
fat	Q9VRY6	FBgn0035715	CG10103	38750	FALSE	FALSE	27.8	0.25	0.041	0.1	0.1	0.3	0.019	0.047	0.79	0.88	0.3	0.041
fat	O97062	FBgn0004779	Ccp84Ae	40821	FALSE	TRUE	31.5	-0.37	0.00091	0.0056	0.54	-0.32	0.0032	0.012	0.69	0.81	0.93	0.022
fat	Q9W4N6	FBgn0029689	CG6428	31351	FALSE	FALSE	27.03	0.53	0.0056	0.023	0.31	0.38	0.034	0.075	0.55	0.71	0.52	0.21
fat	Q05856	FBgn0262601	SmB	34426	FALSE	FALSE	28.95	0.31	0.0077	0.03	0.28	-0.12	0.26	0.37	0.0086	0.042	0.066	0.73
fat	Q9VDD1	FBgn0038868	CG5862	42516	FALSE	FALSE	27.32	-0.37	0.064	0.15	0.068	-0.41	0.041	0.089	0.87	0.92	0.36	0.13
fat	O17452	FBgn0022770	Peritrophin-A	33023	FALSE	FALSE	26.44	-0.35	0.095	0.2	0.044	-0.043	0.83	0.88	0.29	0.46	0.25	0.46
fat	Q8IMP2;Q8IMP1;Q8IMP0	FBgn0051064	CG31064	43277	FALSE	FALSE	25.06	0.69	0.12	0.23	0.033	-0.15	0.72	0.8	0.18	0.34	0.12	0.79
fat	E2QCN4;A8DY80;A8DY81;A8DY82	FBgn0085436	Not1	5740252	FALSE	FALSE	28.4	0.16	0.23	0.37	0.011	-0.15	0.25	0.36	0.1	0.23	0.68	0.43
fat	Q9VHW4	FBgn0010812	unc-45	44910	FALSE	FALSE	25.79	0.34	0.052	0.13	0.083	-0.27	0.12	0.2	0.017	0.068	0.015	0.87
fat	P22464-2;P22464;P22464	FBgn0000083	AnxB9	42492	FALSE	FALSE	32.96	-0.19	0.0095	0.035	0.25	0.15	0.034	0.076	0.0018	0.014	0.2	0.5
fat	Q9W3W8	FBgn0029897	RpL17	31613	FALSE	FALSE	33.06	0.34	0.033	0.09	0.12	-0.08	0.59	0.69	0.059	0.16	0.053	0.65
fat	Q9V6B9	FBgn0033737	Nup54	36360	FALSE	FALSE	27.09	-0.39	0.036	0.094	0.11	-0.11	0.54	0.65	0.26	0.43	0.0088	0.4
fat	A1Z9E0;A1Z9D9	FBgn0033844	bbc	36496	FALSE	FALSE	27.97	-0.68	0.0014	0.0081	0.49	-0.7	0.0012	0.0051	0.94	0.97	0.42	0.11
fat	Q9VC28	FBgn0039233	CG7006	42963	FALSE	FALSE	26.75	-0.45	0.0057	0.024	0.32	-0.33	0.035	0.078	0.55	0.71	0.011	0.15
fat	Q9VIW1;Q8T9G7	FBgn0032785	CG10026	35226	FALSE	FALSE	23.26	-1.4	0.032	0.087	0.12	-0.51	0.4	0.52	0.31	0.49	0.0034	0.73
fat	P35600	FBgn0004913	Gnf1	40607	TRUE	FALSE	26.11	0.99	0.0018	0.0096	0.47	-1.4	7.3e-05	0.00057	7.7e-06	0.00027	0.083	1
fat	Q9VXK7	FBgn0030718	ND-20	32565	FALSE	FALSE	30.61	-0.15	0.12	0.24	0.032	-0.27	0.011	0.031	0.4	0.57	0.09	0.06
fat	Q9W0A8	FBgn0026372	RpL23A	38208	FALSE	FALSE	33.61	0.065	0.54	0.68	0.00099	-0.45	0.00046	0.0025	0.0028	0.019	0.019	0.87
fat	P20028	FBgn0003278	RpI135	33210	FALSE	FALSE	26.96	-0.26	0.081	0.17	0.056	-0.54	0.0013	0.0057	0.18	0.35	0.02	0.38
fat	Q9VEZ3;E1JIM4	FBgn0027948	msps	41952	FALSE	FALSE	28.1	0.24	0.22	0.36	0.013	-0.55	0.01	0.029	0.009	0.043	0.18	0.94
fat	Q9VJZ7	FBgn0022069	Nnp-1	44391	FALSE	FALSE	29.73	-0.66	0.0082	0.031	0.28	-1.4	4.5e-06	6.5e-05	0.023	0.083	0.086	0.91
fat	Q24324	FBgn0010269	Dsor1	31872	FALSE	FALSE	26.92	0.34	0.092	0.19	0.049	-0.19	0.33	0.45	0.066	0.17	0.042	0.75
fat	Q8IND7;Q9VF54	FBgn0264776	CG44014	41893	FALSE	FALSE	24.81	-1.3	0.073	0.16	0.063	-2.2	0.0038	0.013	0.33	0.51	0.04	0.74
fat	Q9VWE4	FBgn0031054	Ssu72	32973	FALSE	FALSE	25.36	0.53	0.15	0.27	0.026	1.3	0.0015	0.0063	0.13	0.27	0.3	0.81
fat	Q9W588	FBgn0026872	CG14777	31099	FALSE	FALSE	25.26	-0.96	0.00013	0.0012	0.75	-0.16	0.42	0.54	0.01	0.047	0.26	0.94
fat	A1Z893	FBgn0033521	CG12896	36101	FALSE	FALSE	24.37	-0.36	0.61	0.74	0.00056	0.68	0.34	0.46	0.3	0.48	3.1e-05	0.76
fat	Q9VVA1	FBgn0036662	CG9706	39876	FALSE	FALSE	24.47	1.9	0.011	0.038	0.25	-0.06	0.93	0.95	0.052	0.15	0.44	0.95
fat	A1Z6N5	FBgn0033093	CG3270	35575	FALSE	FALSE	28.27	-0.5	0.0039	0.018	0.38	-0.61	0.00081	0.0038	0.62	0.76	0.91	0.14
fat	Q9VE10	FBgn0038674	CG14285	42281	FALSE	FALSE	25.16	-0.64	0.0046	0.02	0.36	-0.62	0.0059	0.019	0.94	0.97	0.86	0.13
fat	Q9VXG4	FBgn0030749	AnxB11	32612	FALSE	FALSE	24.62	0.73	0.082	0.18	0.057	1.9	0.00015	0.001	0.051	0.15	0.08	0.92
fat	P29844	FBgn0001218	Hsc70-3	32133	FALSE	FALSE	34.51	-0.049	0.43	0.57	0.0027	0.22	0.0019	0.0075	0.0056	0.031	0.54	0.21
fat	Q9VI84	FBgn0037491	CG1227	40872	FALSE	FALSE	25.06	-1.1	0.0044	0.02	0.36	-2.1	7.2e-06	9.6e-05	0.048	0.14	0.42	0.91
fat	Q9W425	FBgn0023458	Rbcn-3A	31557	FALSE	FALSE	27.84	-0.28	0.22	0.36	0.014	-0.48	0.045	0.095	0.53	0.69	0.19	0.33
fat	Q9V9W4	FBgn0039856	CG1774	43722	FALSE	TRUE	31.68	0.26	0.0063	0.026	0.32	0.43	9.7e-05	0.00071	0.19	0.36	0.32	0.078
fat	A8JNX0;Q9VNS2	FBgn0037182	ArfGAP3	40487	TRUE	FALSE	28.08	-0.36	0.014	0.046	0.23	0.56	0.00053	0.0027	0.00012	0.002	0.27	1
fat	Q9VCA2;Q95R48	FBgn0019952	Orct	42891	FALSE	FALSE	24.46	-1.2	0.0087	0.032	0.28	-0.019	0.96	0.97	0.055	0.15	0.19	0.92
fat	Q95SS8	FBgn0035805	CG7506	38857	FALSE	FALSE	27.16	0.14	0.53	0.67	0.0012	-0.2	0.37	0.49	0.29	0.46	0.39	0.5
fat	Q9W3C8	FBgn0030056	CG11284	31804	FALSE	FALSE	25.8	1.4	0.00062	0.0041	0.61	0.21	0.56	0.66	0.022	0.081	0.45	0.96
fat	A1ZBH8;A1ZBH7	FBgn0263395	hppy	37203	FALSE	FALSE	23.77	1.3	0.046	0.11	0.1	0.087	0.89	0.92	0.17	0.33	0.52	0.84
fat	Q9VKW5	FBgn0032242	CG5355	34421	FALSE	TRUE	32.7	0.22	0.003	0.015	0.42	0.31	0.00015	0.001	0.35	0.52	0.36	0.0069
fat	Q9XZ57;Q7JZD3	FBgn0027066	Eb1	35584	FALSE	TRUE	30.23	-0.29	0.0025	0.012	0.45	-0.46	2.1e-05	0.00021	0.14	0.28	0.53	0.088
fat	P32865;E1JGX2	FBgn0260798	Gprk1	3355013	FALSE	FALSE	24.87	-1.4	0.047	0.12	0.1	-1.3	0.071	0.14	0.88	0.93	0.28	0.42
fat	Q9W185;Q8SXR7	FBgn0034999	CG3394	37887	FALSE	FALSE	26.06	-0.47	0.013	0.044	0.24	-0.61	0.002	0.0079	0.55	0.71	0.23	0.21
fat	Q8INL3;Q9VGY2	FBgn0051373	CG31373	318700	FALSE	FALSE	31.19	0.13	0.17	0.3	0.023	0.34	0.0018	0.0072	0.13	0.27	0.11	0.16
fat	Q9V3A6	FBgn0261274	Ero1L	38500	FALSE	FALSE	24.3	-0.28	0.4	0.55	0.0037	0.12	0.72	0.8	0.4	0.57	0.5	0.55
fat	Q9VEG9	FBgn0038536	CG7655	42128	FALSE	FALSE	26.42	-0.9	0.00015	0.0013	0.75	-0.94	9.7e-05	0.00071	0.89	0.93	0.22	0.13
fat	Q9VM58	FBgn0031877	CG10399	33978	FALSE	TRUE	28.33	0.48	0.00096	0.0058	0.57	0.46	0.0013	0.0055	0.93	0.96	0.51	0.036
fat	Q9VFI3	FBgn0038243	CG8066	41766	FALSE	FALSE	29.7	-0.14	0.1	0.21	0.048	0.24	0.0091	0.027	0.0042	0.026	0.075	0.65
fat	P06754-1	FBgn0003721	Tm1	41852	FALSE	FALSE	31.65	0.38	0.017	0.055	0.21	-0.17	0.26	0.37	0.016	0.064	0.076	0.84
fat	Q9W0B2	FBgn0035252	CG7970	38205	FALSE	FALSE	27.94	-0.98	0.24	0.38	0.013	-1.2	0.15	0.25	0.85	0.91	0.54	0.46
fat	Q9W2M2-2;A4UZR3;Q9W2M2;Q9W2M2-3	FBgn0003748	Treh	45368	FALSE	FALSE	30.18	-0.46	0.00011	0.0011	0.78	-0.22	0.028	0.065	0.088	0.21	0.39	0.22
fat	Q29QQ9	FBgn0034065	Rrp42	36766	FALSE	FALSE	25.43	0.35	0.031	0.086	0.14	0.18	0.24	0.35	0.43	0.61	0.025	0.22
fat	O02373	FBgn0261445	sgl	38760	FALSE	FALSE	25.81	-1.1	0.051	0.12	0.098	-0.034	0.95	0.96	0.17	0.33	0.027	0.82
fat	Q9VQG4	FBgn0019830	colt	33470	FALSE	FALSE	32.58	0.065	0.43	0.57	0.0031	0.16	0.056	0.11	0.39	0.57	0.039	0.024
fat	O97064	FBgn0004777	Ccp84Ag	40819	FALSE	FALSE	31.49	-0.49	6.9e-05	0.00071	0.81	-0.06	0.54	0.65	0.0049	0.028	0.19	0.75
fat	Q9V5E1;B7YZR2	FBgn0033466	Pal1	36033	FALSE	FALSE	26.16	0.36	0.059	0.14	0.086	-0.26	0.16	0.26	0.025	0.089	0.15	0.86
fat	Q9V9U7	FBgn0039869	CG1890	43737	FALSE	FALSE	26.75	0.48	0.0032	0.015	0.42	-0.1	0.48	0.59	0.0092	0.044	0.045	0.88
fat	A1Z7A8	FBgn0033265	coil	35785	TRUE	FALSE	23.52	1.2	0.0022	0.011	0.47	-1.9	3.2e-05	0.0003	5.1e-06	0.00021	0.74	1
fat	Q9VF06	FBgn0038388	CG4287	41939	FALSE	FALSE	24.93	-0.47	0.0038	0.017	0.4	-0.32	0.036	0.079	0.46	0.63	0.31	0.18
fat	Q9VWI0	FBgn0031021	ND-18	32936	FALSE	FALSE	32.44	-0.18	0.079	0.17	0.066	0.086	0.38	0.5	0.066	0.17	0.058	0.29
fat	Q7JZY1	FBgn0039665	CG2310	43473	FALSE	FALSE	25.37	-0.36	0.048	0.12	0.1	-0.72	0.00051	0.0027	0.15	0.3	0.024	0.53
fat	Q9W1X6	FBgn0034796	CG3700	37640	FALSE	FALSE	24.03	0.61	0.045	0.11	0.11	-1.2	0.00051	0.0027	0.00028	0.0036	0.067	1
fat	Q9VDT6	FBgn0038737	CG11447	42359	FALSE	FALSE	24.38	1.8	0.00037	0.0028	0.68	0.32	0.44	0.55	0.021	0.077	0.74	0.97
fat	Q9VIQ6	FBgn0032835	CG16772	35281	FALSE	FALSE	28.67	-0.17	0.14	0.26	0.035	-0.064	0.57	0.67	0.49	0.66	0.01	0.078
fat	Q7K4B3	FBgn0033540	Elp2	36123	FALSE	TRUE	27.8	-0.33	0.015	0.049	0.23	-0.32	0.02	0.049	0.92	0.96	0.64	0.04
fat	Q8SY53	FBgn0032015	Ostgamma	34137	FALSE	FALSE	28.17	-0.18	0.3	0.45	0.0087	-0.24	0.16	0.26	0.79	0.88	0.36	0.12
fat	Q9I7N3;Q9I7N2	FBgn0042127	CG18789	317813	FALSE	FALSE	25.65	0.83	0.021	0.063	0.19	0.69	0.049	0.1	0.77	0.87	0.46	0.33
fat	P82713	FBgn0041337	Cyp309a2	33439	FALSE	FALSE	24.2	-0.52	0.31	0.46	0.0081	0.88	0.093	0.17	0.062	0.16	0.7	0.93
fat	Q9VKC7	FBgn0032398	CG6766	34619	FALSE	FALSE	27.86	0.22	0.088	0.18	0.061	0.046	0.71	0.79	0.32	0.51	0.13	0.18
fat	Q9VKR0	FBgn0032292	EMC3	34479	FALSE	FALSE	27.19	-0.25	0.079	0.17	0.069	-0.0067	0.96	0.97	0.22	0.39	0.33	0.32
fat	Q5BIA9	FBgn0033924	CG8613	36593	FALSE	FALSE	28.19	-0.34	0.052	0.13	0.1	-0.19	0.24	0.36	0.54	0.7	0.61	0.2
fat	Q9VPX5	FBgn0031310	Vps29	33295	FALSE	FALSE	28.99	-0.46	0.00018	0.0015	0.75	-0.19	0.066	0.13	0.066	0.17	0.62	0.3
fat	Q9VUM2	FBgn0036488	CG6878	39656	TRUE	FALSE	26.82	-1.1	3.3e-05	0.00041	0.86	0.019	0.93	0.95	0.00094	0.0086	0.96	0.99
fat	Q7K4H4;E2QD64	FBgn0266570	NO66	31374	TRUE	FALSE	28.78	0.37	0.011	0.038	0.28	-0.6	0.00023	0.0014	5.5e-05	0.0011	0.042	1
fat	Q9VGH0	FBgn0037958	CG6962	41436	FALSE	FALSE	24.08	1.9	0.0063	0.026	0.35	-0.24	0.71	0.78	0.024	0.087	0.12	0.97
fat	P42003	FBgn0011648	Mad	33529	FALSE	FALSE	23.92	2.2	0.00062	0.0042	0.63	0.91	0.11	0.19	0.1	0.23	0.36	0.89
fat	Q9VBV9	FBgn0051103	CG31103	43030	FALSE	FALSE	23.92	-0.7	0.077	0.17	0.073	-1.1	0.0077	0.023	0.43	0.61	0.2	0.56
fat	Q9W0M7;Q8T9L6	FBgn0035162	Sf3b3	38093	FALSE	FALSE	27.96	-0.23	0.3	0.45	0.0091	-0.27	0.23	0.34	0.89	0.94	0.021	0.17
fat	Q9VLM5	FBgn0263852	Dad1	34159	FALSE	FALSE	28.12	-0.15	0.31	0.47	0.0083	0.42	0.011	0.032	0.014	0.058	0.42	0.86
fat	Q9V405;Q9VH79	FBgn0028686	Rpt3	32047	FALSE	TRUE	33.03	0.17	0.014	0.046	0.25	0.1	0.12	0.21	0.44	0.61	0.53	0.0039
fat	Q9VAP1	FBgn0039639	CG14512	43443	FALSE	FALSE	24.76	-1.1	0.002	0.011	0.5	0.074	0.81	0.86	0.014	0.058	0.67	0.96
fat	Q9VG07	FBgn0038106	CG7488	41597	FALSE	FALSE	25.15	1.8	0.018	0.057	0.22	-0.41	0.56	0.66	0.037	0.12	0.54	0.96
fat	Q9VNX8;B7Z098	FBgn0037135	CG7414	40431	FALSE	FALSE	29.38	-0.25	0.039	0.1	0.13	0.25	0.037	0.082	0.0054	0.03	0.048	0.84
fat	Q7KN99	FBgn0261285	Ppcs	42295	FALSE	FALSE	29.57	-0.21	0.073	0.16	0.078	-0.18	0.14	0.23	0.81	0.89	0.81	0.036
fat	Q9VKW4	FBgn0032243	Klp31E	34422	FALSE	FALSE	25.12	-1	0.0064	0.026	0.35	-0.78	0.032	0.073	0.59	0.74	0.23	0.43
fat	Q94529	FBgn0019982	Gs1l	33653	TRUE	FALSE	31.94	-0.21	0.019	0.059	0.21	0.49	1.3e-05	0.00015	1.1e-05	0.00036	0.28	1
fat	Q9VH02	FBgn0037807	CG6293	41259	FALSE	FALSE	23.78	-1.4	0.046	0.11	0.12	-2.1	0.005	0.017	0.46	0.63	0.055	0.65
fat	Q9VKD2	FBgn0032394	CG6746	34614	FALSE	FALSE	29.89	-0.52	0.075	0.16	0.077	0.088	0.75	0.82	0.13	0.28	0.22	0.75
fat	Q9VNW8	FBgn0037144	CG7458	40441	FALSE	FALSE	25.39	-0.31	0.43	0.57	0.0036	-0.93	0.024	0.057	0.26	0.43	0.0045	0.7
fat	Q9VMC9	FBgn0031821	KFase	33907	FALSE	FALSE	27.15	-0.12	0.76	0.84	0.00017	0.3	0.45	0.56	0.46	0.63	0.035	0.56
fat	Q9VC23	FBgn0039238	CG7016	42968	FALSE	FALSE	25.12	-1.9	0.017	0.055	0.23	-2	0.015	0.041	0.97	0.98	0.047	0.39
fat	Q7K4T8	FBgn0033734	CG8520	36357	FALSE	FALSE	25.78	-1.2	0.0015	0.0082	0.54	-0.38	0.25	0.36	0.086	0.21	0.33	0.85
fat	Q0KHZ4;Q8IMK1	FBgn0083969	CG34133	318566	FALSE	FALSE	26.28	-0.65	0.0017	0.0093	0.53	0.077	0.67	0.75	0.0092	0.044	0.92	0.93
fat	Q9VIX2;Q9VIX3;Q8INW7;Q2PDT4	FBgn0041789	Pax	35215	FALSE	TRUE	31.61	-0.31	0.0011	0.0064	0.58	-0.3	0.0014	0.0059	0.94	0.97	0.41	0.0045
fat	Q24179-4;Q24179-2;Q24179-3;Q24179	FBgn0264978	Slh	33434	FALSE	TRUE	29.35	-0.21	0.031	0.085	0.16	-0.36	0.00078	0.0037	0.24	0.42	0.27	0.076
fat	Q9VG23;Q86PF4	FBgn0038088	CG10126	41579	FALSE	FALSE	27.87	-0.34	0.011	0.039	0.29	0.32	0.015	0.04	0.0011	0.0095	0.26	0.96
fat	Q9VSZ6	FBgn0036000	CG3434	39098	FALSE	FALSE	26.34	-0.067	0.71	0.8	0.00032	-0.6	0.0033	0.012	0.047	0.14	0.6	0.78
fat	Q9W4M9	FBgn0026079	Nsun2	45064	FALSE	FALSE	29.73	-0.14	0.22	0.36	0.019	-0.28	0.016	0.042	0.35	0.53	0.014	0.11
fat	Q9V7D2	FBgn0022097	Vha36-1	44702	FALSE	FALSE	31.32	-0.21	0.017	0.054	0.23	0.088	0.28	0.4	0.016	0.066	0.22	0.35
fat	Q86S05-3;E1JH02;Q86S05-2;Q86S05	FBgn0020279	lig	35771	FALSE	TRUE	30	0.24	0.0078	0.03	0.33	0.19	0.03	0.069	0.65	0.78	0.31	0.011
fat	Q9VMI0	FBgn0031774	CG9147	33855	FALSE	FALSE	26.04	-0.64	0.0096	0.035	0.3	-0.57	0.019	0.049	0.82	0.89	0.44	0.2
fat	P26686-3;P26686-2;P26686-5;P26686;P26686-4;P26686-6;P26686-9;P26686-7;P26686-8	FBgn0004587	B52	41670	FALSE	FALSE	30.35	0.25	0.022	0.065	0.2	-0.1	0.32	0.44	0.022	0.082	0.012	0.52
fat	Q9V435;E1JHI6;Q2PDT6;Q8IP47;Q9VJP8;Q2PDT6;Q9VJP8;Q7K540;Q2PDT7	FBgn0045842	yuri	34894	FALSE	FALSE	27.47	0.14	0.34	0.49	0.0073	0.25	0.09	0.17	0.57	0.72	0.003	0.14
fat	Q9VFR4	FBgn0038179	CG9312	41686	FALSE	FALSE	24.57	-0.57	0.35	0.5	0.007	-0.35	0.56	0.66	0.79	0.88	0.078	0.44
fat	Q9VI57	FBgn0037469	Dpck	40846	FALSE	FALSE	24.64	-0.3	0.11	0.22	0.049	0.15	0.41	0.52	0.094	0.22	0.71	0.66
fat	Q9VA69	FBgn0039776	PH4alphaEFB	43620	FALSE	FALSE	25.82	-0.35	0.13	0.25	0.041	0.11	0.64	0.73	0.16	0.32	0.35	0.64
fat	Q9VHX4;B7Z0V3	FBgn0037537	CG2767	40946	FALSE	FALSE	32.66	0.095	0.2	0.34	0.022	0.41	2.3e-05	0.00022	0.0064	0.034	0.033	0.39
fat	A1Z945	FBgn0033766	Nup188	36397	FALSE	FALSE	24.91	-1.1	0.0041	0.018	0.42	-0.06	0.86	0.9	0.041	0.13	0.17	0.92
fat	Q9VYA8	FBgn0030503	Tango2	32319	FALSE	FALSE	25.75	0.6	0.0056	0.023	0.38	0.066	0.73	0.81	0.063	0.17	0.82	0.76
fat	P22700-2	FBgn0263006	SERCA	49297	FALSE	TRUE	35.69	-0.16	0.01	0.037	0.3	-0.26	0.00013	0.00091	0.17	0.33	0.29	0.0037
fat	Q7K084	FBgn0033268	Obp44a	35789	FALSE	FALSE	27.66	-0.41	0.02	0.061	0.22	0.33	0.054	0.11	0.0044	0.026	0.96	0.95
fat	Q9VSW4	FBgn0035980	mRRF1	39067	FALSE	FALSE	27.41	0.35	0.044	0.11	0.13	0.66	0.00067	0.0033	0.19	0.35	0.9	0.45
fat	Q9VW22	FBgn0260655	l(3)76BDm	40140	FALSE	FALSE	25.13	-1	0.032	0.087	0.16	0.36	0.42	0.53	0.039	0.12	0.67	0.94
fat	Q24208;Q24208-2;P45975	FBgn0263740	eIF2gamma	41843	FALSE	FALSE	32.61	-0.21	0.0017	0.0091	0.54	-0.58	1.1e-08	6.2e-07	0.00032	0.0039	0.78	0.61
fat	P05552-2;P05552	FBgn0000054	Adf1	47082	FALSE	FALSE	25.04	0.69	0.012	0.042	0.28	0.76	0.0068	0.021	0.85	0.91	0.55	0.22
fat	P32392	FBgn0262716	Arp3	38898	FALSE	FALSE	29.31	0.29	0.018	0.058	0.23	-0.17	0.15	0.25	0.0098	0.046	0.19	0.77
fat	Q9VV94	FBgn0036655	CG13031	39867	FALSE	FALSE	24.66	-1.2	0.016	0.052	0.25	-0.59	0.19	0.3	0.37	0.54	0.57	0.64
fat	Q8IPT1;Q8IPT0	FBgn0052441	CG32441	40396	FALSE	FALSE	28.04	-0.25	0.024	0.071	0.2	-0.077	0.47	0.58	0.24	0.41	0.4	0.14
fat	Q9VEV1;Q8INB3	FBgn0044826	Pak3	41995	FALSE	FALSE	26.73	-0.26	0.039	0.1	0.14	0.0067	0.96	0.97	0.12	0.26	0.44	0.34
fat	Q00637	FBgn0010213	Sod2	36878	FALSE	FALSE	32.33	-0.28	0.058	0.14	0.11	0.36	0.019	0.048	0.0044	0.027	0.31	0.93
fat	Q9VIK9	FBgn0032873	CG2614	35326	FALSE	FALSE	25.51	-1.1	0.031	0.086	0.17	-0.45	0.37	0.48	0.33	0.51	0.055	0.69
fat	Q9V419	FBgn0028940	Cyp28a5	34817	FALSE	FALSE	27.58	-0.27	0.016	0.052	0.25	0.23	0.033	0.074	0.0025	0.018	0.17	0.87
fat	Q9VLR3;E1JHB5	FBgn0032001	CG8360	34122	FALSE	FALSE	29.12	-0.37	0.077	0.17	0.082	0.4	0.058	0.12	0.013	0.056	0.039	0.93
fat	Q9VH65	FBgn0037755	CG12945	41204	FALSE	FALSE	23.11	1.3	0.015	0.048	0.26	0.84	0.11	0.19	0.49	0.65	0.23	0.59
fat	Q9VVH3	FBgn0036726	QIL1	39948	FALSE	FALSE	30.58	-0.17	0.089	0.19	0.072	-0.086	0.39	0.5	0.53	0.69	0.17	0.041
fat	A8JRB1	FBgn0045761	CHKov1	43067	FALSE	FALSE	25.6	0.45	0.038	0.098	0.15	1.1	4.6e-05	0.00039	0.041	0.13	0.18	0.84
fat	Q9W1D9	FBgn0034951	CG3860	37825	TRUE	FALSE	26.52	-0.91	0.0003	0.0023	0.73	0.54	0.016	0.041	8.7e-05	0.0016	0.27	1
fat	Q9VZU8	FBgn0035401	Alg2	38374	FALSE	TRUE	28.96	-0.51	0.00023	0.0019	0.76	-0.41	0.0016	0.0067	0.53	0.69	0.57	0.072
fat	Q9VA91;Q8IMI7	FBgn0039757	RpS7	43594	FALSE	FALSE	34.5	0.21	0.018	0.057	0.24	-0.2	0.023	0.057	0.0021	0.016	0.15	0.74
fat	Q9VUZ6	FBgn0263605	l(3)72Dn	39774	FALSE	FALSE	26.65	1	0.067	0.15	0.095	0.28	0.61	0.71	0.32	0.5	0.024	0.71
fat	Q24560;A1ZBL0;A1ZBL1	FBgn0003887	betaTub56D	37238	FALSE	TRUE	35.62	0.15	0.0045	0.02	0.42	0.011	0.83	0.88	0.046	0.14	0.057	0.0044
fat	Q9VNA5	FBgn0250746	Prosbeta7	40639	FALSE	FALSE	32.18	0.081	0.35	0.5	0.0079	0.11	0.19	0.3	0.79	0.88	0.19	0.0093
fat	Q9W3C3	FBgn0030060	CG2004	31809	FALSE	FALSE	33	-0.084	0.43	0.57	0.0044	0.047	0.66	0.74	0.38	0.56	0.14	0.083
fat	Q9W509	FBgn0023549	Mct1	31198	FALSE	FALSE	27.26	-0.54	0.024	0.07	0.21	0.45	0.053	0.11	0.0049	0.028	0.39	0.98
fat	Q9VYR1;Q76NR6	FBgn0030362	regucalcin	32165	FALSE	FALSE	34.93	-0.059	0.46	0.61	0.0033	0.55	2.1e-06	3.9e-05	4.2e-05	0.00094	0.065	0.99
fat	Q9Y141	FBgn0027584	CG4757	41330	FALSE	FALSE	27.63	-0.72	0.025	0.073	0.2	-1.3	0.00024	0.0014	0.15	0.3	0.12	0.75
fat	Q02748	FBgn0001942	eIF4A	33835	FALSE	FALSE	34.08	0.2	0.025	0.073	0.2	-0.25	0.0066	0.021	0.0011	0.0095	0.077	0.81
fat	Q8MSW9	FBgn0053505	U3-55K	3346176	FALSE	FALSE	26.22	-0.35	0.16	0.29	0.035	-0.52	0.045	0.095	0.63	0.76	0.0034	0.31
fat	Q9W130	FBgn0015040	Cyp9c1	37941	FALSE	FALSE	23.24	-0.74	0.16	0.29	0.035	-0.17	0.75	0.82	0.44	0.61	0.53	0.62
fat	Q9VB04;Q7KRX5	FBgn0045862	btz	43331	FALSE	FALSE	25.16	0.69	0.044	0.11	0.14	0.91	0.01	0.029	0.62	0.76	0.57	0.4
fat	B7YZL6;B7YZL7;Q7YTZ4;B7YZL5;Q0E919;B7YZL1;B7YZL8;B7YZL3;B7YZL2;A1ZBH5;Q1RKY1	FBgn0034420	CG10737	37202	FALSE	TRUE	29.48	-0.39	0.0012	0.0069	0.6	-0.26	0.02	0.049	0.37	0.55	0.55	0.076
fat	Q7K2G1;Q7K2G1	FBgn0033886	Rpn13	36545	FALSE	FALSE	27.88	0.51	0.074	0.16	0.089	0.13	0.65	0.74	0.33	0.51	0.33	0.55
fat	Q8IN43	FBgn0044812	TotC	117462	FALSE	FALSE	29.63	-0.29	0.086	0.18	0.077	0.18	0.28	0.4	0.053	0.15	0.0013	0.71
fat	Q7JUN3;Q8IMC0	FBgn0039890	CG2316	43772	FALSE	FALSE	25.64	-0.6	0.0014	0.0081	0.58	-0.73	0.00024	0.0014	0.57	0.72	0.21	0.18
fat	P11996;P11997;P11995	FBgn0002563	Lsp1beta	33274	FALSE	FALSE	27.79	1.3	0.01	0.037	0.32	5.2	1.4e-09	1.4e-07	1.1e-05	0.00036	0.001	1
fat	Q9V3V6	FBgn0028684	Rpt5	42805	FALSE	FALSE	32.39	0.19	0.055	0.13	0.12	-0.11	0.26	0.38	0.036	0.12	0.27	0.37
fat	Q9VPN3	FBgn0031247	CG11562	33200	FALSE	FALSE	22.96	-0.54	0.29	0.44	0.013	0.46	0.37	0.49	0.17	0.33	0.98	0.82
fat	Q9V774	FBgn0033981	Cyp6a21	36665	FALSE	FALSE	28.17	-0.42	0.0066	0.026	0.38	-0.16	0.27	0.38	0.19	0.35	0.49	0.35
fat	Q9VWV4;Q9VWV2;Q7KUW2;Q7KUW3;Q9VWV5	FBgn0052549	CG32549	32822	FALSE	FALSE	33.46	0.15	0.079	0.17	0.085	0.55	2.1e-06	3.9e-05	0.0023	0.017	0.014	0.71
fat	Q9VE91	FBgn0038603	PKD	42203	FALSE	FALSE	27.95	-0.33	0.0034	0.016	0.47	0.23	0.029	0.067	0.00074	0.0074	0.096	0.93
fat	Q961D3	FBgn0039644	CG11897	43450	FALSE	FALSE	24.95	0.31	0.25	0.4	0.018	-1	0.001	0.0046	0.002	0.015	0.09	0.99
fat	Q95SN8	FBgn0051200	CG31200	326124	FALSE	FALSE	27.71	-0.19	0.3	0.45	0.012	-0.47	0.015	0.04	0.27	0.44	0.13	0.41
fat	Q9V496	FBgn0087002	apolpp	43827	TRUE	FALSE	37.61	-0.38	0.00022	0.0018	0.77	0.86	6.3e-09	4.3e-07	4.4e-09	2.1e-06	0.033	1
fat	Q0KHZ6	FBgn0039697	CG7834	43515	FALSE	FALSE	35.14	0.072	0.38	0.54	0.0065	0.34	0.00054	0.0028	0.03	0.1	0.041	0.27
fat	Q9V3D6-2;Q9V3D6	FBgn0027873	Cpsf100	43426	FALSE	FALSE	24.65	0.73	0.004	0.018	0.45	-0.12	0.58	0.68	0.013	0.057	0.095	0.94
fat	Q0E8K5	FBgn0035107	mri	38028	FALSE	FALSE	23.99	-0.72	0.15	0.27	0.042	-2.3	0.00014	0.00094	0.03	0.1	0.11	0.96
fat	Q9V3K3	FBgn0040075	rept	40092	TRUE	FALSE	28.75	0.48	0.0079	0.03	0.36	-0.6	0.0016	0.0066	0.00017	0.0026	0.046	1
fat	Q9VKM3	FBgn0010612	ATPsynG	46069	FALSE	FALSE	34.09	-0.39	0.0011	0.0063	0.62	0.15	0.14	0.23	0.0012	0.01	0.15	0.92
fat	P55830;P55830;P55830-2;P55830-3;H9XVL8	FBgn0017545	RpS3A	43768	FALSE	TRUE	34.48	-0.21	0.0038	0.018	0.46	-0.2	0.0054	0.018	0.91	0.95	0.17	0.00091
fat	Q7JWD3	FBgn0033191	CG1598	35690	FALSE	FALSE	29.46	-0.36	0.0084	0.031	0.35	-0.51	0.00058	0.0029	0.4	0.58	0.65	0.14
fat	Q9VAM9	FBgn0039650	Mesh1	43456	FALSE	FALSE	23.78	0.65	0.3	0.45	0.013	0.41	0.5	0.61	0.78	0.88	0.78	0.45
fat	P20240	FBgn0266420	Ote	37090	FALSE	TRUE	28.11	0.58	0.003	0.015	0.49	0.59	0.0025	0.0095	0.96	0.98	0.2	0.092
fat	Q9VVU6	FBgn0036828	CG6841	40064	FALSE	FALSE	25.76	0.21	0.18	0.31	0.034	-0.58	0.0012	0.0053	0.0016	0.013	0.032	0.98
fat	Q9VGI5;Q9VGI4	FBgn0017581	Lk6	44672	FALSE	FALSE	26.12	0.16	0.25	0.4	0.018	-0.47	0.0026	0.0097	0.004	0.025	0.034	0.93
fat	Q8INX1	FBgn0051800	CG31800	318947	FALSE	FALSE	24.68	-0.61	0.12	0.23	0.057	-0.62	0.11	0.2	0.98	0.99	0.097	0.27
fat	Q9VPN5	FBgn0024352	Stip1	33202	FALSE	FALSE	31.47	0.27	0.00031	0.0024	0.75	-0.0046	0.94	0.96	0.0049	0.028	0.46	0.23
fat	A1Z8H6	FBgn0033602	Cpr47Ee	36193	FALSE	FALSE	23.41	-1.6	0.0064	0.026	0.4	-1.1	0.042	0.091	0.53	0.69	0.66	0.56
fat	Q9VPR6	FBgn0031267	Ipk2	33236	FALSE	FALSE	23.39	1.4	0.025	0.072	0.22	-0.24	0.69	0.77	0.059	0.16	0.051	0.94
fat	Q9VTE5	FBgn0010741	Pfdn2	46121	FALSE	FALSE	29.63	0.62	0.00024	0.0019	0.77	0.19	0.17	0.27	0.038	0.12	0.064	0.67
fat	Q0E971;Q0E973;Q0E972;A1Z9X0;Q0E974	FBgn0261854	aPKC	47594	FALSE	FALSE	23.92	-1.5	0.013	0.043	0.31	-0.77	0.16	0.26	0.37	0.54	0.23	0.68
fat	Q9VMM9	FBgn0031734	CG11147	33803	FALSE	FALSE	26.31	-0.57	0.075	0.16	0.095	0.2	0.52	0.62	0.088	0.21	0.04	0.84
fat	Q9VMW7	FBgn0031663	CG8891	33718	FALSE	TRUE	29.67	-0.29	0.0085	0.032	0.36	-0.35	0.0024	0.009	0.68	0.81	0.74	0.03
fat	Q9XZS3	FBgn0026879	CG13364	50364	FALSE	FALSE	28.02	-0.047	0.75	0.83	0.00033	-0.51	0.0023	0.0088	0.035	0.11	0.02	0.73
fat	Q9VMY5;Q0KIE6	FBgn0037215	beta-Man	40524	FALSE	FALSE	27.89	-0.58	0.00065	0.0043	0.68	-0.39	0.011	0.032	0.37	0.54	0.34	0.22
fat	Q9VIX7;Q8INW9	FBgn0032773	fon	35211	FALSE	FALSE	32.47	-0.32	0.0065	0.026	0.4	0.26	0.02	0.05	0.0009	0.0083	0.11	0.94
fat	Q9V3E3	FBgn0028648	mRpL50	38796	FALSE	FALSE	26.58	0.077	0.52	0.66	0.0028	-0.34	0.0097	0.028	0.022	0.081	0.74	0.67
fat	Q9W253	FBgn0034727	mRpS29	37563	FALSE	FALSE	28.26	-0.49	0.0016	0.009	0.58	-0.35	0.016	0.041	0.47	0.64	0.26	0.15
fat	Q9VKD9	FBgn0032387	CG16965	34607	FALSE	FALSE	27.5	-0.57	0.0017	0.0094	0.58	-0.8	7.2e-05	0.00056	0.32	0.5	0.58	0.3
fat	Q9VDL0;E1JIR0	FBgn0038808	Srp14	42436	FALSE	FALSE	28.61	-0.37	0.0035	0.017	0.49	-0.016	0.89	0.92	0.036	0.11	0.83	0.53
fat	Q9VIB0;Q9VIB1	FBgn0015577	alpha-Est9	40897	FALSE	TRUE	26.4	-0.31	0.0045	0.02	0.45	-0.24	0.023	0.056	0.6	0.74	0.33	0.032
fat	Q9VXC1	FBgn0085354	CG34325	32656	FALSE	FALSE	28.86	-0.13	0.15	0.28	0.043	0.54	1.4e-05	0.00015	5.7e-05	0.0012	0.19	0.99
fat	Q9VDL5	FBgn0040575	CG15922	50048	FALSE	FALSE	25.21	-0.74	0.011	0.039	0.33	0.54	0.054	0.11	0.0028	0.02	0.96	0.99
fat	Q9VHM3	FBgn0037621	M1BP	41042	TRUE	FALSE	23.5	2.3	0.00026	0.0021	0.77	-0.89	0.097	0.18	0.00032	0.0039	0.15	1
fat	Q9VPY2	FBgn0024314	Plap	43978	FALSE	FALSE	29.81	0.3	0.002	0.01	0.56	-0.16	0.063	0.12	0.00094	0.0086	0.85	0.85
fat	Q9VVG5	FBgn0040793	CG7630	50266	FALSE	FALSE	32.04	-0.74	0.026	0.074	0.22	0.64	0.047	0.099	0.0047	0.028	0.09	0.99
fat	Q9VA95	FBgn0260860	Bet5	43590	FALSE	FALSE	27.81	-0.39	0.039	0.1	0.17	-0.66	0.0013	0.0057	0.28	0.46	0.39	0.39
fat	Q0KI98	FBgn0010803	TrpRS	45399	FALSE	FALSE	29.37	-0.32	0.04	0.1	0.16	0.23	0.13	0.22	0.015	0.062	0.054	0.84
fat	Q9I7W2	FBgn0030100	CG12106	31856	FALSE	FALSE	25.12	0.51	0.05	0.12	0.14	0.75	0.0065	0.02	0.5	0.66	0.16	0.38
fat	Q9V3L7	FBgn0027785	NP15.6	42282	FALSE	FALSE	29.45	0.12	0.37	0.52	0.0083	0.61	0.00022	0.0014	0.018	0.069	0.023	0.78
fat	P16163	FBgn0003961	Uro	34060	FALSE	FALSE	29.85	0.58	0.022	0.066	0.24	-0.056	0.81	0.87	0.067	0.17	0.53	0.81
fat	Q24562;Q9W1T4	FBgn0005411	U2af50	32602	FALSE	TRUE	27.95	-0.36	0.025	0.073	0.22	-0.39	0.015	0.04	0.87	0.92	0.29	0.079
fat	Q9VPL0;Q9VPK9	FBgn0031229	CG3436	33180	FALSE	FALSE	26.47	0.57	0.0019	0.0099	0.57	0.17	0.3	0.41	0.085	0.2	0.24	0.61
fat	A1ZA52	FBgn0034045	CG8249	36742	FALSE	FALSE	26.74	-0.89	0.0024	0.012	0.54	-0.84	0.0039	0.013	0.88	0.93	0.046	0.22
fat	Q9VPZ5	FBgn0031327	CG5397	33313	FALSE	FALSE	30.8	-0.19	0.074	0.16	0.1	0.009	0.93	0.95	0.18	0.34	0.11	0.17
fat	Q9W0X2	FBgn0035089	Phk-3	37997	FALSE	FALSE	27.26	-1	0.00025	0.002	0.78	0.16	0.48	0.59	0.0015	0.012	0.069	0.99
fat	Q7K9H6	FBgn0026369	Sara	44263	FALSE	FALSE	23.98	-0.81	0.01	0.036	0.35	0.099	0.73	0.8	0.034	0.11	0.95	0.91
fat	Q9VH76	FBgn0266720	Snap24	41193	FALSE	FALSE	27.42	0.4	0.024	0.07	0.23	0.23	0.17	0.26	0.48	0.65	0.27	0.22
fat	P25843	FBgn0000308	chic	33834	FALSE	FALSE	32.12	0.1	0.18	0.32	0.037	0.38	9.6e-05	0.0007	0.02	0.075	0.39	0.27
fat	P11449	FBgn0003979	Vm26Aa	33829	FALSE	FALSE	25.8	2	0.0093	0.034	0.37	0.95	0.18	0.28	0.3	0.48	0.81	0.76
fat	Q9Y0I1	FBgn0027378	MRG15	41850	FALSE	FALSE	25.61	0.44	0.016	0.052	0.29	0.15	0.37	0.49	0.23	0.4	0.063	0.42
fat	Q9VDW6-1;Q9VDW6;Q9VDW6-4;Q9VDW6-3;Q9VDW6-2;Q9VDW3;Q0KI50;Q7YU29	FBgn0260003	Dys	42327	FALSE	FALSE	28.47	-0.66	0.025	0.071	0.23	-0.19	0.49	0.6	0.23	0.4	0.94	0.63
fat	Q9W0J9;Q8SXQ8	FBgn0035189	CG9119	38124	FALSE	FALSE	31.29	-0.18	0.026	0.075	0.22	0.22	0.0094	0.028	0.0014	0.012	0.18	0.73
fat	P46824	FBgn0010235	Klc	39445	FALSE	FALSE	29.95	-0.15	0.18	0.31	0.038	-0.0068	0.95	0.97	0.36	0.54	0.15	0.11
fat	Q7KNA0	FBgn0027607	CG8230	35897	FALSE	FALSE	24.84	-0.26	0.29	0.44	0.017	0.61	0.02	0.05	0.019	0.073	0.093	0.93
fat	P02518	FBgn0001226	Hsp27	39078	TRUE	FALSE	31.11	1.3	0.0012	0.0071	0.63	-0.6	0.084	0.16	0.00085	0.008	0.38	1
fat	Q9W0S4	FBgn0029002	miple2	44787	TRUE	FALSE	23.94	-0.85	0.0014	0.0079	0.62	0.53	0.029	0.067	0.0004	0.0046	0.47	1
fat	Q95SZ9;P91632;Q0E8A7;A4IJ59	FBgn0262737	mub	40436	TRUE	FALSE	26.66	0.53	0.0016	0.0087	0.6	-0.44	0.0061	0.019	0.00014	0.0023	0.85	1
fat	B7Z0B3;B7Z0B2	FBgn0035452	CG10359	38434	FALSE	FALSE	29.9	-0.31	0.016	0.052	0.29	-0.089	0.45	0.56	0.2	0.36	0.068	0.23
fat	Q7KRU8;Q8I0T0	FBgn0015222	Fer1HCH	46415	FALSE	TRUE	33.37	0.26	0.011	0.038	0.35	0.31	0.0028	0.01	0.67	0.79	0.061	0.02
fat	Q59E30;Q95RI5;Q59E29;Q86BI4	FBgn0014163	fax	39826	FALSE	FALSE	30.88	0.017	0.86	0.91	8.5e-05	0.16	0.11	0.19	0.3	0.48	0.048	0.073
fat	Q0E9F9	FBgn0033241	CG2915	35754	FALSE	FALSE	31.15	-0.21	0.0095	0.035	0.37	0.17	0.027	0.062	0.0015	0.012	0.081	0.65
fat	Q9XZ29	FBgn0011606	Klp3A	31240	FALSE	FALSE	24.26	1.4	0.01	0.037	0.36	-0.6	0.24	0.35	0.0099	0.046	0.12	0.99
fat	Q9VNG5;Q7KTS2	FBgn0037363	Atg17	40700	FALSE	FALSE	23.6	1.1	0.096	0.2	0.085	-0.41	0.53	0.64	0.11	0.24	0.18	0.9
fat	Q9VMT2	FBgn0031692	TpnC25D	33752	FALSE	FALSE	30.37	0.16	0.11	0.22	0.07	-0.22	0.031	0.07	0.011	0.05	0.11	0.6
fat	Q9VTW1;Q9VTW0	FBgn0036272	Sms	39403	FALSE	FALSE	28.87	-0.22	0.0091	0.034	0.38	0.1	0.19	0.3	0.0074	0.038	0.077	0.42
fat	A1Z7S0	FBgn0015477	Rme-8	35939	FALSE	FALSE	28.14	0.05	0.56	0.7	0.0023	-0.29	0.0028	0.01	0.01	0.047	0.51	0.51
fat	Q9VMI3;A1ZAW7	FBgn0031771	ND-51	33852	FALSE	TRUE	32.69	-0.23	0.023	0.068	0.25	-0.14	0.15	0.25	0.49	0.65	0.26	0.035
fat	Q7KVQ0	FBgn0011824	CG4038	37397	FALSE	FALSE	29.66	-0.35	0.00014	0.0013	0.83	-0.81	1.6e-09	1.5e-07	0.00024	0.0032	0.15	0.88
fat	O97066	FBgn0262801	twr	40815	FALSE	FALSE	27.59	-1.3	0.14	0.26	0.056	-1	0.24	0.35	0.82	0.9	0.48	0.48
fat	Q9W4Z1	FBgn0003159	CG2841	44529	FALSE	FALSE	24.35	-0.88	0.18	0.32	0.039	-0.56	0.39	0.51	0.72	0.84	0.37	0.49
fat	P23380	FBgn0262736	Vha16-1	44307	FALSE	FALSE	27.97	0.69	0.031	0.086	0.21	1.4	0.00016	0.001	0.1	0.23	0.69	0.81
fat	Q95TS5	FBgn0036570	IntS9	39763	FALSE	FALSE	26.19	1.3	0.058	0.14	0.14	-0.031	0.96	0.97	0.16	0.31	0.16	0.86
fat	Q9VDL4	FBgn0038804	CG10877	42432	FALSE	FALSE	27.92	-0.29	0.19	0.32	0.037	-0.46	0.043	0.092	0.57	0.72	0.021	0.29
fat	Q00963	FBgn0250788	beta-Spec	32746	FALSE	TRUE	34.65	-0.22	0.0003	0.0023	0.78	-0.32	4.3e-06	6.3e-05	0.17	0.32	0.39	0.0013
fat	Q9VLY4	FBgn0031936	CG13794	34048	FALSE	FALSE	24.1	-2.8	0.00088	0.0054	0.68	-3.1	0.00029	0.0017	0.73	0.84	0.11	0.5
fat	Q9V3T2	FBgn0040383	CG5254	31020	FALSE	FALSE	30.77	0.17	0.12	0.23	0.072	0.073	0.48	0.59	0.52	0.68	0.4	0.052
fat	Q8T0J5;Q9VE80	FBgn0038610	CG7675	42211	FALSE	FALSE	29.77	-0.14	0.13	0.25	0.063	-0.2	0.029	0.067	0.59	0.73	0.25	0.019
fat	Q9V429-2;Q9V429	FBgn0040070	Trx-2	34281	FALSE	FALSE	32.31	-0.24	0.083	0.18	0.1	-0.018	0.89	0.93	0.24	0.42	0.1	0.26
fat	Q9VN93;Q9VN93-2	FBgn0260462	CG12163	40628	FALSE	TRUE	31.84	0.29	0.0035	0.016	0.52	0.23	0.015	0.039	0.64	0.77	0.32	0.015
fat	A1ZB68	FBgn0063497	GstE3	37108	FALSE	FALSE	30.77	0.15	0.086	0.18	0.099	0.31	0.0012	0.0053	0.17	0.32	0.32	0.069
fat	A8E6W0	FBgn0054039	CG34039	3885643	FALSE	FALSE	25.94	0.25	0.17	0.3	0.046	0.59	0.0029	0.011	0.17	0.33	0.11	0.51
fat	Q9VZX8	FBgn0035372	CG12093	38343	FALSE	FALSE	26.58	-2.8	0.0057	0.024	0.45	-2.4	0.015	0.04	0.75	0.85	0.47	0.52
fat	Q8SX35	FBgn0052850	CG32850	318246	FALSE	FALSE	25.03	0.18	0.65	0.76	0.0013	0.3	0.45	0.56	0.83	0.9	0.015	0.34
fat	Q9U9Q4	FBgn0022023	eIF3h	45682	FALSE	FALSE	31.55	0.022	0.73	0.82	0.00055	0.041	0.52	0.63	0.83	0.9	0.011	0.00088
fat	Q9W1G4	FBgn0034931	CG2812	37801	FALSE	FALSE	23.54	-1.6	0.0086	0.032	0.4	-0.57	0.31	0.42	0.2	0.36	0.98	0.81
fat	A8JR56	FBgn0038826	Syp	42460	TRUE	FALSE	24.91	2.6	3.2e-06	6.3e-05	0.97	0.28	0.47	0.58	0.00055	0.0058	0.22	1
fat	Q9VX14	FBgn0030872	Ucp4A	32764	FALSE	FALSE	27.11	-0.92	5.1e-05	0.00056	0.89	-0.19	0.28	0.39	0.0085	0.042	0.69	0.93
fat	A1Z8D0	FBgn0263510	nclb	36150	FALSE	TRUE	28.69	0.27	0.018	0.057	0.29	0.24	0.036	0.08	0.81	0.89	0.14	0.027
fat	O15971	FBgn0015789	Rab10	33025	FALSE	FALSE	28.5	0.36	0.021	0.065	0.27	-0.37	0.017	0.044	0.0019	0.015	0.79	0.97
fat	A1Z7H3;Q8T3L1;A1Z7H2	FBgn0263120	Acsl	46068	FALSE	TRUE	34.64	-0.13	0.034	0.091	0.21	-0.027	0.64	0.73	0.21	0.38	0.025	0.0043
fat	Q4Z8K6-2;Q4Z8K6	FBgn0262114	RanBPM	36102	FALSE	FALSE	29.07	-0.17	0.2	0.34	0.037	0.078	0.54	0.65	0.18	0.34	0.19	0.3
fat	O76902	FBgn0025381	rush	31105	FALSE	FALSE	31.55	0.47	0.077	0.17	0.11	1.4	2.2e-05	0.00022	0.015	0.06	0.14	0.95
fat	Q7YTY6	FBgn0028988	Spn42Dd	49808	FALSE	FALSE	30.44	-0.18	0.1	0.2	0.088	0.3	0.01	0.029	0.0044	0.026	0.05	0.81
fat	Q9VPJ0	FBgn0031217	CG11377	33166	FALSE	FALSE	23.86	1.6	0.041	0.1	0.19	-0.71	0.34	0.46	0.037	0.12	0.86	0.96
fat	Q7K0D8	FBgn0033264	Nup50	35784	FALSE	TRUE	28.37	-0.29	0.011	0.039	0.37	-0.23	0.042	0.09	0.65	0.78	0.17	0.037
fat	P46223	FBgn0014026	RpL7A	31588	FALSE	FALSE	34.22	-0.26	0.035	0.092	0.21	-0.53	0.00017	0.0011	0.1	0.23	0.15	0.34
fat	Q9W4X7;Q9VDM6	FBgn0029629	eIF3g1	31243	FALSE	FALSE	29.76	0.17	0.15	0.28	0.054	0.025	0.83	0.88	0.38	0.56	0.29	0.12
fat	Q8SX32	FBgn0032329	Art8	34528	TRUE	FALSE	26.62	0.71	2.8e-05	0.00035	0.92	-0.16	0.22	0.32	0.00013	0.0021	0.2	1
fat	Q9VD55	FBgn0038925	Cchl	42590	FALSE	FALSE	25.44	-1.9	0.018	0.057	0.3	-0.37	0.62	0.71	0.16	0.31	0.44	0.87
fat	P04052	FBgn0003277	RpII215	32100	FALSE	FALSE	27.09	-0.3	0.065	0.15	0.13	-0.37	0.024	0.058	0.73	0.84	0.51	0.12
fat	Q9V9U1	FBgn0039873	Smvt	43744	FALSE	FALSE	27.33	0.67	0.011	0.04	0.36	-0.23	0.35	0.47	0.016	0.064	0.87	0.94
fat	Q9W1I8	FBgn0034913	Snap29	37774	FALSE	FALSE	25.01	-0.69	0.12	0.23	0.075	-0.23	0.59	0.69	0.45	0.62	0.12	0.58
fat	Q7JV69	FBgn0028983	Spn55B	49803	FALSE	FALSE	29.42	-0.58	0.0022	0.011	0.59	0.1	0.54	0.64	0.0082	0.041	0.83	0.92
fat	Q960Z0;A4V4A1	FBgn0030268	Klp10A	32049	FALSE	FALSE	26.61	0.4	0.019	0.058	0.29	-0.054	0.73	0.81	0.053	0.15	0.094	0.7
fat	Q94526	FBgn0017561	Ork1	32020	FALSE	FALSE	27.82	-1.4	0.21	0.35	0.036	-0.85	0.44	0.55	0.72	0.84	0.87	0.55
fat	Q9VSR5	FBgn0011787	mRpL12	44326	TRUE	FALSE	30.59	0.68	2.4e-05	0.00032	0.93	-0.45	0.0016	0.0067	3.5e-06	0.00015	0.3	1
fat	Q9VHI8;Q8INP8;Q8INP9	FBgn0037652	CG11980	41078	FALSE	TRUE	31.32	0.38	0.00013	0.0012	0.85	0.27	0.003	0.011	0.33	0.51	0.22	0.027
fat	Q9VD14	FBgn0038961	CG13850	42630	FALSE	FALSE	29.45	0.37	0.00023	0.0019	0.81	-0.13	0.12	0.2	0.00034	0.0041	0.81	0.91
fat	Q9V455	FBgn0027338	Kap-alpha3	41158	FALSE	FALSE	31.79	0.16	0.053	0.13	0.16	0.026	0.74	0.82	0.23	0.41	0.093	0.041
fat	P48607-8;Q8IMQ1;P48607-7;Q8IMQ0;P48607-2;P48607-10;Q8IMP8;P48607-9;A1Z0H7;P48607-5;Q8IG88;P48607-3;P48607	FBgn0003495	spz	43256	FALSE	FALSE	23.67	-0.66	0.13	0.24	0.07	0.39	0.36	0.48	0.089	0.21	0.12	0.88
fat	Q9VZ71	FBgn0030234	CG15211	32006	FALSE	FALSE	26.99	-0.61	0.46	0.61	0.006	-1.3	0.13	0.22	0.57	0.72	0.099	0.61
fat	Q9VWG3	FBgn0261593	RpS10b	32953	FALSE	FALSE	33.62	-0.15	0.062	0.14	0.14	-0.29	0.0011	0.005	0.2	0.36	0.12	0.041
fat	Q9VQ39	FBgn0031360	CG31937	326177	FALSE	FALSE	27.47	-0.18	0.5	0.64	0.0045	-0.25	0.36	0.48	0.86	0.91	0.064	0.23
fat	Q7JWQ7	FBgn0034709	Swim	37537	FALSE	FALSE	31.72	-0.49	3.6e-06	6.9e-05	0.97	-0.12	0.11	0.19	0.0027	0.019	0.97	0.59
fat	Q9VJ68	FBgn0086909	CG31751	35118	FALSE	FALSE	28.28	0.53	0.00053	0.0037	0.75	0.67	4.2e-05	0.00036	0.41	0.59	0.18	0.14
fat	Q8MS38	FBgn0053217	CG33217	2768951	FALSE	FALSE	27.29	-1.7	0.002	0.011	0.6	-1.2	0.02	0.05	0.46	0.63	0.61	0.59
fat	Q9VI80	FBgn0037487	thw	40868	FALSE	FALSE	25.45	0.38	0.12	0.24	0.073	-0.057	0.81	0.87	0.21	0.38	0.14	0.61
fat	Q9VYW3	FBgn0266421	RPA3	32113	FALSE	FALSE	28.69	0.41	0.053	0.13	0.16	-0.1	0.6	0.7	0.082	0.2	0.0076	0.73
fat	Q9VRQ1	FBgn0035639	kri	38655	FALSE	FALSE	25.37	0.45	0.6	0.73	0.0021	0.7	0.42	0.54	0.84	0.9	0.16	0.47
fat	Q9VEX6	FBgn0040237	bor	53565	FALSE	FALSE	31.18	0.13	0.087	0.18	0.11	-0.24	0.0037	0.013	0.0019	0.015	0.038	0.6
fat	O62531	FBgn0024833	AP-1mu	41150	FALSE	FALSE	26.47	-0.33	0.071	0.16	0.13	-0.094	0.59	0.69	0.35	0.52	0.15	0.33
fat	Q7KVU4;O96676	FBgn0026144	CBP	31669	TRUE	FALSE	26.16	3.5	1.9e-05	0.00027	0.94	-0.52	0.4	0.52	0.00019	0.0027	0.4	1
fat	Q9VGA0	FBgn0038020	GstD9	41502	FALSE	FALSE	29.09	-0.35	0.15	0.27	0.061	-0.15	0.52	0.63	0.55	0.71	0.78	0.33
fat	Q9VUC1	FBgn0026418	Hsc70Cb	39557	FALSE	TRUE	33.49	0.33	1.8e-05	0.00025	0.94	0.26	0.00024	0.0014	0.4	0.57	0.25	0.0017
fat	P47949;Q8IQP5	FBgn0010424	TpnC73F	39916	FALSE	FALSE	33.68	-0.17	0.12	0.23	0.078	-0.3	0.0093	0.027	0.38	0.55	0.15	0.08
fat	Q9VMV6	FBgn0031670	SelT	33725	FALSE	FALSE	28.58	-0.11	0.58	0.71	0.0026	-0.63	0.0048	0.016	0.076	0.19	0.063	0.74
fat	Q9VBU6;B7Z0Q3	FBgn0039303	CG11857	43042	FALSE	FALSE	26.77	-0.27	0.1	0.2	0.094	-0.19	0.25	0.36	0.71	0.83	0.14	0.13
fat	Q9VLS7	FBgn0031990	PAPLA1	34109	FALSE	FALSE	31.07	-0.19	0.05	0.12	0.17	0.31	0.0024	0.0091	0.00088	0.0083	0.36	0.89
fat	Q9VTE0	FBgn0036118	Blos2	39234	FALSE	FALSE	24.11	-0.96	0.076	0.17	0.12	0.56	0.29	0.4	0.05	0.14	0.59	0.94
fat	Q8MMC6;Q9W0Y5;Q0E8W1	FBgn0043792	CG30427	37986	FALSE	FALSE	26.45	-0.28	0.2	0.34	0.04	-0.083	0.7	0.78	0.52	0.68	0.24	0.31
fat	Q95RA8	FBgn0038965	mats	42634	FALSE	FALSE	25.77	0.55	0.019	0.059	0.3	0.99	0.00021	0.0013	0.16	0.31	0.47	0.63
fat	A1Z6Q0	FBgn0265003	koi	35594	FALSE	FALSE	29.71	-0.48	0.00016	0.0014	0.85	-0.19	0.071	0.14	0.059	0.16	0.28	0.35
fat	Q9W247;G5CKU5	FBgn0034733	CG4752	37569	FALSE	FALSE	31.71	0.24	0.0042	0.019	0.52	0.81	2.4e-09	2.1e-07	3.5e-05	0.00085	0.48	0.98
fat	Q9V3U6	FBgn0250848	26-29-p	39547	FALSE	FALSE	33.87	-0.098	0.11	0.22	0.089	0.16	0.013	0.035	0.0056	0.031	0.0046	0.17
fat	Q8IQB7	FBgn0043806	CG32032	192535	FALSE	TRUE	28.35	-0.25	0.015	0.049	0.34	-0.29	0.0065	0.02	0.79	0.88	0.34	0.016
fat	Q9V3W7	FBgn0040284	SF2	53443	FALSE	TRUE	30.34	0.17	0.034	0.091	0.22	0.11	0.15	0.25	0.58	0.73	0.78	0.0067
fat	Q9VAP0;Q7KRW4	FBgn0039640	CG14516	43444	FALSE	FALSE	26.31	0.41	0.17	0.3	0.051	-0.46	0.13	0.22	0.048	0.14	0.012	0.89
fat	Q7JWU9	FBgn0034242	CG14480	36988	FALSE	FALSE	24.77	0.7	0.19	0.33	0.044	-0.45	0.39	0.51	0.13	0.28	0.2	0.86
fat	A1Z813	FBgn0033460	Sec24AB	36025	FALSE	TRUE	27.8	-0.33	0.0056	0.023	0.48	-0.22	0.052	0.11	0.46	0.63	0.29	0.067
fat	P09180	FBgn0003279	RpL4	43349	FALSE	TRUE	35.34	-0.17	0.013	0.044	0.36	-0.35	2.3e-05	0.00022	0.052	0.15	0.15	0.045
fat	Q9VZJ2	FBgn0035490	CG1136	38479	FALSE	FALSE	27.98	-0.21	0.098	0.2	0.1	-0.39	0.0057	0.018	0.34	0.51	0.29	0.17
fat	Q9V3C7;A8JNP7	FBgn0028429	I-2	39156	FALSE	FALSE	29.05	0.092	0.49	0.63	0.0055	0.6	0.00021	0.0013	0.012	0.053	0.022	0.82
fat	Q9VW54	FBgn0028695	Rpn1	40174	FALSE	TRUE	32.84	0.14	0.017	0.055	0.33	-0.028	0.62	0.71	0.04	0.12	0.6	0.023
fat	Q9VTD6;Q7KUE9;Q8IQF2	FBgn0263776	CG43693	39231	FALSE	FALSE	24.97	0.56	0.074	0.16	0.13	-1	0.0029	0.01	0.0014	0.012	0.27	1
fat	Q27597;Q8IPJ7	FBgn0015623	Cpr	33883	FALSE	FALSE	35.48	-0.099	0.085	0.18	0.12	-0.18	0.0039	0.013	0.3	0.48	0.19	0.0016
fat	Q7K1Y4	FBgn0033972	Ciao1	36655	FALSE	FALSE	28.78	-0.18	0.036	0.095	0.22	0.059	0.47	0.58	0.048	0.14	0.36	0.19
fat	Q76NR0	FBgn0052626	AMPdeam	32352	FALSE	FALSE	31.93	0.18	0.02	0.062	0.3	0.77	3.8e-09	2.8e-07	1.9e-05	0.00053	0.13	0.99
fat	Q9V4Q8	FBgn0033210	U2A	35713	FALSE	FALSE	26.15	-0.33	0.044	0.11	0.2	-0.6	0.0011	0.0047	0.23	0.41	0.025	0.37
fat	Q9W2N0	FBgn0034577	cpa	37387	FALSE	FALSE	29.57	0.15	0.17	0.3	0.053	-0.18	0.12	0.21	0.045	0.13	0.41	0.47
fat	Q9W133	FBgn0035039	Adck	37938	FALSE	FALSE	26.33	-0.65	0.00015	0.0014	0.85	-1.1	3.3e-07	9.2e-06	0.04	0.12	0.63	0.67
fat	Q9VUI8	FBgn0036460	CG5114	39624	FALSE	FALSE	25.15	-1.8	0.01	0.036	0.41	-0.65	0.32	0.44	0.21	0.38	0.11	0.82
fat	O16158	FBgn0020907	Scp2	42015	FALSE	FALSE	28	0.24	0.13	0.25	0.075	0.43	0.011	0.03	0.38	0.56	0.16	0.25
fat	Q9VCB9	FBgn0039163	CG5515	42875	FALSE	FALSE	29.01	0.42	0.0076	0.029	0.45	0.71	8.6e-05	0.00064	0.16	0.32	0.36	0.4
fat	Q7KML2	FBgn0027572	CG5009	37028	FALSE	TRUE	30.87	-0.22	0.018	0.057	0.32	-0.15	0.091	0.17	0.57	0.72	0.25	0.018
fat	Q9W590	FBgn0266284	Ns3	31097	FALSE	FALSE	26.85	0.42	0.021	0.064	0.3	-0.34	0.058	0.12	0.0049	0.028	0.052	0.95
fat	Q9VXP1;Q8IR26	FBgn0030693	CG8974	32532	FALSE	FALSE	25.42	0.41	0.3	0.46	0.021	-0.14	0.72	0.8	0.33	0.51	0.019	0.65
fat	Q9VX02	FBgn0030883	CG7772	32776	FALSE	FALSE	28.06	-0.5	0.18	0.31	0.051	-0.73	0.057	0.12	0.65	0.78	0.32	0.42
fat	Q9V3P2	FBgn0261535	l(2)34Fd	34839	FALSE	FALSE	23.43	0.77	0.1	0.2	0.1	0.15	0.74	0.81	0.34	0.52	0.017	0.67
fat	Q9VPL9;B7Z002;Q9VPL6	FBgn0266557	kis	33185	FALSE	FALSE	27.74	-0.62	0.24	0.39	0.033	-1.1	0.043	0.093	0.5	0.67	0.53	0.58
fat	P36872-2;P36872	FBgn0004889	tws	47877	FALSE	TRUE	29.19	0.28	0.0063	0.025	0.48	0.34	0.0015	0.0064	0.65	0.78	0.74	0.02
fat	Q9W0H8;Q8IRH7	FBgn0025682	scf	38145	FALSE	FALSE	28.31	0.33	0.021	0.064	0.3	0.18	0.18	0.27	0.44	0.61	0.78	0.15
fat	Q7KSS0;Q0KI87	FBgn0262617	CG43143	41256	FALSE	FALSE	24.9	-0.55	0.058	0.14	0.17	-0.4	0.16	0.26	0.69	0.81	0.22	0.32
fat	Q8INH5;Q8INH6;Q9VFW7;Q9VFW8;Q9VFW9	FBgn0052473	CG32473	41636	FALSE	FALSE	30.99	0.11	0.16	0.29	0.061	0.15	0.077	0.15	0.77	0.87	0.38	0.0062
fat	P53997	FBgn0014879	Set	41844	FALSE	FALSE	28.23	0.51	0.00085	0.0053	0.73	0.31	0.027	0.063	0.27	0.45	0.15	0.23
fat	Q8T8R1	FBgn0034802	CNBP	37646	FALSE	FALSE	28.6	-0.24	0.19	0.32	0.049	-0.15	0.39	0.5	0.74	0.84	0.36	0.15
fat	Q9W492;Q9W490	FBgn0053080	CG33080	31491	FALSE	FALSE	25.3	0.76	0.068	0.15	0.15	1.5	0.0014	0.006	0.21	0.38	0.17	0.75
fat	Q7JRN6	FBgn0033820	CG4716	36471	FALSE	FALSE	28.15	0.36	0.14	0.27	0.071	1.4	1.6e-05	0.00017	0.0066	0.035	0.065	0.97
fat	Q95RZ5	FBgn0262508	CG43078	NA	FALSE	FALSE	27.23	-0.24	0.34	0.49	0.017	-0.25	0.32	0.44	0.98	0.99	0.61	0.17
fat	Q9VPC1	FBgn0037018	CG4042	40291	FALSE	FALSE	25.87	-0.63	0.00073	0.0047	0.74	-0.94	1.1e-05	0.00013	0.17	0.33	0.63	0.44
fat	O77263	FBgn0025629	CG4045	31176	FALSE	FALSE	26.67	-1.2	0.027	0.077	0.27	0.032	0.95	0.97	0.098	0.22	0.071	0.89
fat	A8DZ29;O61380;Q9VCH1	FBgn0023213	eIF4G1	43839	FALSE	TRUE	32.39	-0.15	0.017	0.055	0.34	-0.25	0.0004	0.0022	0.24	0.41	0.11	0.0036
fat	Q8SY58	FBgn0030799	CG4872	32676	FALSE	FALSE	28.62	0.77	0.018	0.057	0.33	0.093	0.76	0.83	0.12	0.26	0.75	0.78
fat	Q8IP18;Q9V3W1	FBgn0032586	Tpr2	34984	FALSE	FALSE	27.68	-0.11	0.48	0.63	0.0065	-0.32	0.047	0.099	0.33	0.51	0.034	0.28
fat	Q8T079	FBgn0043456	CG4747	192507	FALSE	TRUE	30.64	-0.32	0.00092	0.0056	0.72	-0.46	1.8e-05	0.00019	0.21	0.38	0.29	0.051
fat	P48588	FBgn0086472	RpS25	41343	FALSE	FALSE	33.21	-0.13	0.13	0.24	0.084	-0.25	0.0064	0.02	0.31	0.49	0.063	0.032
fat	Q8IRG6;Q8IRG6-2	FBgn0002183	dre4	38248	FALSE	FALSE	27.62	0.53	0.056	0.13	0.17	0.1	0.7	0.78	0.26	0.43	0.032	0.6
fat	Q9W2M4	FBgn0034583	CG10527	37393	FALSE	FALSE	33.83	0.2	0.048	0.12	0.19	-0.017	0.86	0.9	0.12	0.26	0.078	0.18
fat	Q9V3V0	FBgn0028554	x16	33967	FALSE	FALSE	26.26	-0.67	0.0044	0.019	0.54	-0.43	0.05	0.1	0.42	0.6	0.16	0.36
fat	P42787;P42787-5;P42787-7	FBgn0004648	svr	30998	FALSE	FALSE	28.5	-0.31	0.055	0.13	0.18	0.14	0.36	0.48	0.049	0.14	0.033	0.7
fat	P28668;P28668-2	FBgn0005674	GluProRS	42834	FALSE	TRUE	32.18	-0.15	0.032	0.088	0.25	-0.18	0.015	0.039	0.79	0.88	0.25	0.0019
fat	Q0E8U4	FBgn0031489	CG17224	33510	FALSE	FALSE	29.61	-0.11	0.46	0.61	0.0077	0.32	0.04	0.088	0.051	0.15	0.026	0.66
fat	Q7JVY0	FBgn0265935	coro	35596	FALSE	FALSE	30.56	0.17	0.11	0.21	0.1	-0.27	0.012	0.034	0.0053	0.03	0.97	0.75
fat	Q94899	FBgn0013746	alien	34225	FALSE	TRUE	28.49	0.28	0.0078	0.03	0.46	0.28	0.0079	0.024	1	1	0.75	0.0097
fat	Q9W0H2	FBgn0035207	Herc4	38151	FALSE	FALSE	26.39	0.38	0.014	0.047	0.38	-0.12	0.41	0.52	0.021	0.08	0.96	0.79
fat	Q95TK5;Q9V9W5	FBgn0039854	CG1635	43720	FALSE	TRUE	30.12	-0.19	0.018	0.055	0.34	-0.075	0.31	0.42	0.28	0.46	0.45	0.017
fat	Q7K1V5;E2QD00	FBgn0037374	jagn	40714	FALSE	FALSE	26.6	0.35	0.11	0.22	0.099	0.79	0.0013	0.0056	0.15	0.3	0.24	0.63
fat	Q7KUT8	FBgn0020389	Papss	40167	FALSE	FALSE	31.12	-0.45	2.2e-05	0.0003	0.94	-0.068	0.39	0.51	0.003	0.021	0.053	0.64
fat	Q9VAI6	FBgn0039685	Obp99b	43497	FALSE	FALSE	26.66	0.027	0.92	0.95	4.8e-05	1.2	0.00014	0.00097	0.0037	0.024	0.2	0.99
fat	P05303;A4V3Q6	FBgn0000557	eEF1alpha2	43736	FALSE	FALSE	28.89	-0.27	0.022	0.066	0.31	0.071	0.52	0.63	0.038	0.12	0.27	0.5
fat	Q9VGS3	FBgn0037873	SdhC	41340	FALSE	FALSE	28.82	-0.36	0.075	0.16	0.14	0.065	0.74	0.81	0.13	0.28	0.3	0.63
fat	Q7K0L4;E1JHX5	FBgn0037094	CG7611	40386	FALSE	FALSE	29.3	-0.59	0.00015	0.0014	0.86	-0.31	0.021	0.051	0.13	0.27	0.28	0.36
fat	A1Z7V1;A8DY79;A1Z7V2	FBgn0259246	brp	35977	FALSE	FALSE	24.7	-0.79	0.071	0.16	0.15	-1.4	0.0028	0.01	0.29	0.46	0.19	0.7
fat	Q9VIF0	FBgn0032925	CG9246	35386	FALSE	FALSE	26.17	-0.36	0.11	0.22	0.1	-1.2	2.8e-05	0.00026	0.013	0.055	0.029	0.94
fat	Q9VFN7	FBgn0038198	Npc2b	41710	FALSE	FALSE	29	-0.15	0.49	0.64	0.0064	0.83	0.0012	0.0054	0.005	0.029	0.058	0.97
fat	Q7K5N8;A1ZAU4	FBgn0034229	CG4847	36973	FALSE	FALSE	34	-0.12	0.14	0.26	0.078	0.14	0.096	0.17	0.031	0.11	0.038	0.23
fat	Q7JYH3	FBgn0034576	ND-B14.7	37385	FALSE	FALSE	29.8	0.11	0.43	0.58	0.01	-0.062	0.64	0.73	0.38	0.55	0.031	0.18
fat	Q9VMA2	FBgn0263200	Galt	33935	FALSE	FALSE	32.3	0.083	0.44	0.59	0.009	0.38	0.0022	0.0083	0.063	0.17	0.05	0.39
fat	Q8SYJ2	FBgn0052230	ND-MLRQ	317928	FALSE	TRUE	32.61	-0.19	0.0047	0.02	0.54	-0.15	0.024	0.058	0.59	0.74	0.22	0.0013
fat	Q9VGS2	FBgn0037874	Tctp	41341	FALSE	FALSE	33.43	0.079	0.38	0.53	0.014	0.5	1.9e-05	0.0002	0.0029	0.02	0.028	0.75
fat	A1ZBF1	FBgn0034403	CG18190	37179	FALSE	FALSE	25.61	2.3	0.00085	0.0053	0.74	0.72	0.22	0.33	0.068	0.17	0.29	0.93
fat	Q9V427;E1JJF3	FBgn0027108	Inx2	31646	FALSE	FALSE	30.54	-0.39	0.00061	0.0041	0.77	-0.88	2.5e-08	1.2e-06	0.0015	0.012	0.65	0.87
fat	Q9VM14;Q7KTK9	FBgn0031912	muc	34021	FALSE	FALSE	34.54	0.062	0.37	0.52	0.016	0.37	3.8e-05	0.00034	0.005	0.029	0.03	0.35
fat	P13678;Q4QQA3	FBgn0003093	Pkc98E	43428	FALSE	FALSE	23.81	-0.71	0.084	0.18	0.13	0.18	0.65	0.74	0.12	0.26	0.79	0.84
fat	Q9VSL5	FBgn0035906	GstO2	38974	FALSE	FALSE	29.04	-0.11	0.34	0.5	0.018	0.55	0.0001	0.00074	0.00055	0.0058	0.062	0.97
fat	Q9VKD8;Q95TU2	FBgn0032388	CG6686	34608	FALSE	FALSE	23.57	-1.3	0.0088	0.033	0.45	-1.1	0.017	0.044	0.82	0.9	0.13	0.37
fat	Q9VQF4	FBgn0031451	CG9961	33459	FALSE	FALSE	23.1	0.54	0.091	0.19	0.12	0.21	0.5	0.61	0.45	0.62	0.62	0.49
fat	Q9VCI4	FBgn0039113	CG10217	42809	FALSE	FALSE	27.2	-0.32	0.035	0.093	0.25	-0.46	0.0036	0.013	0.46	0.63	0.5	0.17
fat	Q27594	FBgn0013771	Cyp6a9	36663	FALSE	TRUE	29.44	-0.45	0.00063	0.0042	0.77	-0.4	0.0016	0.0066	0.77	0.86	0.33	0.036
fat	Q9VE61	FBgn0038627	CG7694	42230	FALSE	FALSE	26	0.5	0.12	0.23	0.098	0.16	0.61	0.71	0.43	0.61	0.02	0.5
fat	Q6IDD9-2;Q6IDD9;A8JNN3;A8JNN2;A8JNN1	FBgn0262579	Ect4	38895	FALSE	FALSE	24.56	-0.81	0.064	0.15	0.17	-0.56	0.19	0.29	0.67	0.8	0.25	0.44
fat	Q9W3B3	FBgn0030066	CG1885	31817	FALSE	FALSE	28.14	-0.11	0.37	0.52	0.016	0.27	0.043	0.092	0.042	0.13	0.53	0.59
fat	Q9W3V8;B7Z127	FBgn0029906	xit	31623	FALSE	FALSE	27.31	-0.77	0.18	0.32	0.058	-0.4	0.49	0.6	0.64	0.77	0.45	0.52
fat	Q9VYV4	FBgn0030328	Amun	32123	FALSE	FALSE	27.93	0.27	0.09	0.19	0.13	-0.17	0.26	0.37	0.051	0.15	0.46	0.68
fat	Q9VMS1	FBgn0015031	cype	46040	FALSE	FALSE	32.91	-0.1	0.54	0.68	0.0049	-0.4	0.026	0.062	0.22	0.39	0.0064	0.43
fat	Q9VL18;Q9VL18-2	FBgn0032198	eEF1delta	34363	FALSE	FALSE	32.88	-0.054	0.55	0.69	0.0046	-0.17	0.077	0.15	0.38	0.56	0.031	0.045
fat	Q9VU04	FBgn0052109	CG32109	39444	FALSE	FALSE	26.18	0.52	0.0058	0.024	0.52	0.24	0.16	0.26	0.25	0.43	0.95	0.39
fat	Q9W402	FBgn0029868	ND-B16.6	31578	FALSE	FALSE	31.76	-0.045	0.65	0.77	0.0021	0.00042	1	1	0.75	0.85	0.022	0.023
fat	P54399;P54399-2	FBgn0014002	Pdi	39651	FALSE	FALSE	34.91	0.037	0.55	0.69	0.0048	0.19	0.0057	0.018	0.09	0.21	0.087	0.02
fat	Q9VPY9	FBgn0031322	CG5001	33308	FALSE	FALSE	26.65	-0.24	0.057	0.13	0.19	-0.18	0.13	0.23	0.74	0.85	0.085	0.05
fat	Q8IRM7;Q9W324;Q9W323;Q59E68;Q8IRM6	FBgn0028341	Ptpmeg2	31907	FALSE	FALSE	24.75	-1.6	0.025	0.072	0.31	-1.5	0.031	0.071	0.94	0.96	0.23	0.39
fat	A1ZBD8	FBgn0034391	CG15080	37167	FALSE	FALSE	26.9	0.48	0.015	0.05	0.38	-0.24	0.2	0.3	0.011	0.05	0.47	0.92
fat	Q9VLU4	FBgn0031973	Spn28Dc	34091	FALSE	FALSE	27.43	0.16	0.2	0.34	0.052	0.032	0.79	0.85	0.46	0.63	0.063	0.11
fat	Q9VVA7	FBgn0036666	TSG101	39881	FALSE	FALSE	28.08	-0.18	0.23	0.37	0.044	-0.05	0.74	0.81	0.53	0.69	0.07	0.16
fat	Q9VJ26	FBgn0032731	Swip-1	35158	FALSE	FALSE	26.82	0.2	0.15	0.27	0.079	0.32	0.028	0.064	0.54	0.7	0.43	0.12
fat	Q07152;A4V488;Q07152-2	FBgn0003204	ras	43873	FALSE	FALSE	29.49	0.21	0.11	0.22	0.11	-0.48	0.0012	0.0052	0.001	0.0092	0.013	0.97
fat	Q7K1Z5	FBgn0034061	Ufc1	36762	FALSE	FALSE	29.59	-0.23	0.16	0.29	0.074	-0.36	0.037	0.082	0.59	0.74	0.063	0.18
fat	Q960U8;Q7KT52	FBgn0004797	mdy	44887	FALSE	FALSE	28.18	0.5	0.16	0.29	0.073	2.4	1.5e-06	3e-05	0.00091	0.0085	0.03	1
fat	P27716	FBgn0004646	ogre	45382	FALSE	FALSE	27.78	-0.62	0.028	0.078	0.3	-0.94	0.002	0.0079	0.4	0.57	0.0051	0.47
fat	Q9VR33	FBgn0031635	tank	33684	FALSE	FALSE	25.23	-1.7	0.0047	0.02	0.56	-0.42	0.44	0.55	0.1	0.23	0.73	0.89
fat	Q02645-3	FBgn0263391	hts	37230	FALSE	FALSE	25.2	-0.69	0.0062	0.025	0.53	0.25	0.27	0.39	0.0079	0.04	0.36	0.96
fat	Q8SXQ5	FBgn0030584	CG14407	32410	FALSE	FALSE	29.09	0.28	0.19	0.32	0.061	0.91	0.00033	0.0018	0.044	0.13	0.13	0.83
fat	O76904	FBgn0004650	fs(1)N	45973	FALSE	FALSE	23.86	-1.1	0.14	0.26	0.087	-1.4	0.076	0.14	0.81	0.89	0.069	0.47
fat	P13008	FBgn0261597	RpS26	35098	FALSE	FALSE	31.67	0.29	0.077	0.17	0.16	-0.17	0.29	0.41	0.051	0.15	0.083	0.69
fat	O97102	FBgn0264922	smt3	33981	FALSE	FALSE	31.02	0.3	0.091	0.19	0.14	-0.23	0.18	0.29	0.038	0.12	0.8	0.78
fat	Q9VZS5;D1Z3A1;D1Z3A1;REV__Q9VGU6	FBgn0035422	RpL28	38397	FALSE	FALSE	33.73	-0.081	0.48	0.63	0.0086	-0.6	4.9e-05	0.00041	0.0044	0.026	0.015	0.86
fat	Q7KLV9;Q7KLV9	FBgn0028689	Rpn6	36638	FALSE	FALSE	32.57	0.081	0.27	0.42	0.035	-0.083	0.26	0.37	0.12	0.26	0.037	0.047
fat	P91664	FBgn0017578	Max	40095	FALSE	FALSE	22.5	0.5	0.058	0.14	0.2	0.62	0.022	0.054	0.74	0.85	0.16	0.27
fat	Q9VCY8-2	FBgn0038984	AdipoR	42656	FALSE	FALSE	28.53	-0.22	0.089	0.19	0.14	-0.26	0.051	0.11	0.84	0.9	0.084	0.049
fat	Q9VDG5	FBgn0013995	Calx	42481	FALSE	FALSE	25.36	0.44	0.28	0.43	0.033	-0.8	0.061	0.12	0.041	0.13	0.013	0.94
fat	A1Z942;A1Z943;Q0E9A1;E1JH47;Q7JQK6;Q961I1;A1Z944;Q1RL13	FBgn0261625	GLS	36396	FALSE	FALSE	25.67	0.24	0.29	0.44	0.03	-0.24	0.3	0.42	0.15	0.3	0.004	0.66
fat	P40423	FBgn0003514	sqh	31554	FALSE	FALSE	28.21	0.22	0.066	0.15	0.18	0.38	0.003	0.011	0.31	0.49	0.47	0.14
fat	P54359;Q7KLG8	FBgn0014029	2018-09-02	42438	FALSE	FALSE	25.94	0.54	0.035	0.094	0.27	0.6	0.022	0.053	0.87	0.92	0.062	0.21
fat	Q11002;A8DYJ3;Q11002-2;Q9VXH6;Q9VFV0	FBgn0012051	CalpA	37232	FALSE	FALSE	31.04	-0.15	0.038	0.098	0.26	-0.45	3.2e-06	5.2e-05	0.0057	0.032	0.19	0.34
fat	Q9V400	FBgn0028427	Ilk	53573	FALSE	FALSE	30.09	-0.48	9.4e-05	0.00092	0.91	-0.032	0.74	0.81	0.004	0.025	0.65	0.78
fat	Q9U1H9	FBgn0003321	sbr	43944	FALSE	FALSE	25.27	-1.1	0.036	0.095	0.27	-1.1	0.04	0.087	0.97	0.98	0.8	0.33
fat	Q9VCA8	FBgn0043884	mask	50070	FALSE	FALSE	27.39	0.13	0.27	0.42	0.036	-0.2	0.11	0.19	0.059	0.16	0.34	0.48
fat	Q9VSC3	FBgn0010406	RNaseX25	38885	FALSE	FALSE	27.97	-0.31	0.0057	0.024	0.55	-0.023	0.82	0.87	0.054	0.15	0.69	0.36
fat	Q9W1V1	FBgn0034817	Art7	37664	FALSE	FALSE	24.66	1.4	0.0024	0.012	0.66	1.1	0.016	0.041	0.55	0.7	0.49	0.51
fat	Q9VTJ8;B7Z0G3	FBgn0036173	CG7394	39294	FALSE	FALSE	28.7	0.54	0.019	0.059	0.37	0.84	0.0009	0.0041	0.33	0.51	0.33	0.44
fat	Q7JXB9	FBgn0033690	EndoG	36309	FALSE	FALSE	27.58	-0.21	0.16	0.28	0.08	0.26	0.086	0.16	0.032	0.11	0.012	0.73
fat	P41375	FBgn0004926	eIF2beta	39433	FALSE	FALSE	30.25	0.24	0.014	0.047	0.42	0.036	0.69	0.77	0.12	0.26	0.81	0.15
fat	Q9VWQ7;Q8IQX5	FBgn0030955	CG6891	32865	FALSE	FALSE	26.38	0.18	0.35	0.5	0.022	-0.76	0.00058	0.0029	0.0019	0.015	0.013	0.98
fat	Q9V813	FBgn0034215	Mtap	36955	FALSE	FALSE	32.41	-0.23	0.016	0.051	0.4	-0.03	0.73	0.81	0.12	0.26	0.27	0.12
fat	Q9W0R0	FBgn0265574	Cdc5	38062	FALSE	FALSE	25.86	0.74	0.00097	0.0058	0.76	0.23	0.24	0.35	0.069	0.17	0.17	0.74
fat	Q6NP72	FBgn0033608	CG13220	36200	FALSE	FALSE	31.68	0.12	0.41	0.56	0.015	-0.23	0.12	0.2	0.096	0.22	0.59	0.53
fat	Q8INM3;Q8INM3-2;Q9VGZ8	FBgn0037810	sle	41262	TRUE	FALSE	26.69	2.1	3.2e-06	6.4e-05	0.98	-0.63	0.064	0.12	9.6e-06	0.00032	0.62	1
fat	Q95SI7	FBgn0038924	CG6028	42589	FALSE	FALSE	33.13	-0.17	0.02	0.061	0.37	0.32	0.00016	0.0011	6.6e-05	0.0013	0.54	0.93
fat	Q9VQB4	FBgn0031418	CG3609	33421	FALSE	FALSE	33.67	-0.23	0.023	0.069	0.34	-0.57	1e-05	0.00012	0.02	0.076	0.073	0.49
fat	Q9VLB1	FBgn0032125	Cpr30B	34270	FALSE	FALSE	30.99	-0.26	0.026	0.074	0.33	0.039	0.72	0.8	0.064	0.17	0.62	0.38
fat	Q9VHG6	FBgn0037669	Ibf2	41102	FALSE	FALSE	24.96	0.44	0.039	0.1	0.26	0.27	0.19	0.29	0.55	0.7	0.053	0.27
fat	Q9VKY8;Q9VKY8-2	FBgn0032224	Sps2	34397	FALSE	FALSE	25.22	-0.77	0.14	0.26	0.093	-1	0.056	0.11	0.72	0.84	0.11	0.45
fat	Q9VCK1	FBgn0039099	GILT2	42788	FALSE	FALSE	30.19	-0.12	0.37	0.52	0.019	-0.056	0.67	0.76	0.74	0.85	0.068	0.071
fat	Q9VXK6	FBgn0030719	eIF5	32566	FALSE	TRUE	30.55	-0.21	0.036	0.094	0.28	-0.13	0.18	0.28	0.54	0.7	0.38	0.034
fat	O76922;O76922	FBgn0000146	aub	34524	FALSE	FALSE	25.25	0.84	0.13	0.25	0.1	-1.9	0.0019	0.0076	0.0017	0.014	0.03	1
fat	A1Z7K2	FBgn0050349	CG30349	35885	FALSE	FALSE	28.03	-0.27	0.095	0.19	0.14	-1.4	4.9e-08	2e-06	7.2e-05	0.0014	0.01	1
fat	A1Z934	FBgn0033761	CG8778	36392	FALSE	FALSE	30.51	0.4	0.0011	0.0064	0.75	0.63	1e-05	0.00012	0.14	0.28	0.058	0.22
fat	Q9Y105	FBgn0027090	GlnRS	45786	FALSE	FALSE	30.51	-0.15	0.055	0.13	0.22	0.11	0.16	0.25	0.023	0.083	0.71	0.2
fat	Q9VPB9	FBgn0037019	Pex16	40293	FALSE	FALSE	25.93	-0.41	0.065	0.15	0.19	-0.69	0.0041	0.014	0.36	0.54	0.74	0.42
fat	Q7KB18;A1ZBF3	FBgn0034405	Jheh2	37181	FALSE	FALSE	31.91	0.12	0.092	0.19	0.15	0.33	0.0001	0.00075	0.037	0.12	0.22	0.098
fat	Q8MKJ5	FBgn0050197	CG30197	246513	FALSE	FALSE	24.62	-0.46	0.29	0.44	0.035	0.083	0.85	0.89	0.37	0.55	0.13	0.63
fat	O96824	FBgn0026090	CG14812	31137	FALSE	FALSE	29.15	0.095	0.31	0.46	0.03	0.44	0.00014	0.00096	0.016	0.064	0.15	0.51
fat	Q9I7R1;Q4LDP7;E1JHY0;Q0E8F4;Q0E8F5	FBgn0036211	CG5946	39336	FALSE	FALSE	32.01	0.18	0.062	0.14	0.2	0.14	0.12	0.21	0.8	0.88	0.16	0.012
fat	Q9VB55;A8JRE3	FBgn0010328	woc	47249	FALSE	FALSE	28.29	0.41	0.081	0.17	0.16	-0.33	0.15	0.25	0.029	0.1	0.068	0.89
fat	P83949-5;P83949-6;P83949-3;P83949-4;P83949-2;P83949	FBgn0003944	Ubx	42034	FALSE	FALSE	23.5	-0.54	0.29	0.44	0.035	0.048	0.92	0.95	0.41	0.58	0.26	0.64
fat	P50887;REV__P50887	FBgn0015288	RpL22	31022	FALSE	FALSE	33.32	0.15	0.086	0.18	0.16	0.13	0.14	0.23	0.86	0.91	0.049	0.0072
fat	Q9V3G1	FBgn0261602	RpL8	44251	FALSE	TRUE	33.58	-0.2	0.025	0.071	0.34	-0.38	0.00023	0.0014	0.15	0.3	0.17	0.09
fat	O17445;A8Y560	FBgn0028697	RpL15	3354918	FALSE	FALSE	32.55	-0.31	0.01	0.036	0.48	-0.07	0.53	0.64	0.13	0.27	0.11	0.27
fat	Q9W1F7	FBgn0034936	CG2970	37807	FALSE	FALSE	30.6	0.39	8e-05	0.00081	0.92	-0.072	0.36	0.48	0.00048	0.0053	0.38	0.87
fat	Q9VMX3	FBgn0031657	CG3756	33712	FALSE	FALSE	26.76	0.38	0.24	0.39	0.048	-0.47	0.15	0.25	0.072	0.18	0.0034	0.87
fat	Q9Y119	FBgn0027560	Tps1	33642	FALSE	FALSE	37.26	0.23	0.0041	0.019	0.61	0.53	5e-07	1.3e-05	0.0062	0.034	0.21	0.36
fat	Q8IR13;Q9VXF8;Q7KUX7	FBgn0262734	eIF4H1	49809	FALSE	FALSE	30.64	-0.15	0.17	0.3	0.078	-0.28	0.014	0.037	0.37	0.54	0.14	0.085
fat	Q24192	FBgn0014380	RhoL	41136	FALSE	FALSE	25.75	-0.69	0.22	0.36	0.055	-1.2	0.037	0.081	0.49	0.66	0.57	0.6
fat	A8JUQ2;Q9VWN2	FBgn0030976	CG7378	32888	FALSE	FALSE	26.86	-0.55	0.0011	0.0066	0.75	-0.69	0.00013	0.00088	0.49	0.65	0.83	0.17
fat	Q9VMH7	FBgn0031777	CG9154	33858	FALSE	FALSE	23.51	0.48	0.29	0.44	0.035	-0.043	0.92	0.95	0.41	0.58	0.47	0.61
fat	Q8IH18;Q8IH18;Q9V486	FBgn0052016	4E-T	43836	FALSE	FALSE	25.74	-0.82	0.038	0.098	0.28	-0.4	0.29	0.41	0.42	0.59	0.16	0.56
fat	P13217-2;P13217;E1JJD5	FBgn0262738	norpA	31376	FALSE	FALSE	24.06	-0.58	0.011	0.039	0.47	-0.66	0.0045	0.015	0.78	0.87	0.99	0.19
fat	Q9I7M3;Q8INW5;Q9VIW5	FBgn0032783	CG10237	35222	FALSE	FALSE	30.2	-0.14	0.061	0.14	0.21	-0.9	1.7e-10	2.5e-08	3.9e-07	4e-05	0.8	1
fat	Q8MSB1	FBgn0051357	CG31357	326135	FALSE	FALSE	26.63	-0.41	0.0048	0.021	0.59	-0.014	0.92	0.94	0.041	0.13	0.37	0.63
fat	Q7K148	FBgn0029134	Prosbeta5	45269	FALSE	FALSE	31.7	0.17	0.11	0.22	0.13	-0.28	0.015	0.039	0.0062	0.033	0.45	0.77
fat	Q7K486	FBgn0034315	CG5721	37084	FALSE	FALSE	28.47	0.23	0.15	0.28	0.09	0.47	0.0062	0.02	0.27	0.44	0.27	0.33
fat	Q9NCC3	FBgn0040475	SH3PX1	39136	FALSE	FALSE	27.71	-0.47	0.0044	0.019	0.6	-0.6	0.00065	0.0032	0.55	0.7	0.31	0.16
fat	O97159;E1JI46;Q59E34	FBgn0262519	Mi-2	40170	FALSE	FALSE	27.18	0.29	0.27	0.42	0.041	-0.16	0.53	0.63	0.22	0.39	0.09	0.62
fat	Q8MLZ7;REV__O76460	FBgn0020414	Idgf3	34981	FALSE	FALSE	29.89	0.22	0.053	0.13	0.23	0.28	0.016	0.041	0.68	0.8	0.25	0.039
fat	Q9VIQ8	FBgn0032833	COX4	35279	FALSE	FALSE	33.8	-0.13	0.14	0.26	0.1	0.38	0.0003	0.0017	0.00048	0.0053	0.12	0.92
fat	Q9VH10	FBgn0261928	CG42795	41252	FALSE	FALSE	27.7	0.54	0.39	0.54	0.019	1.2	0.066	0.13	0.45	0.62	0.87	0.64
fat	Q9VKF0	FBgn0032378	CycY	34593	FALSE	FALSE	24.06	-1.2	0.032	0.088	0.31	0.54	0.31	0.43	0.029	0.099	0.26	0.96
fat	Q9V3J5	FBgn0040350	CG3690	31047	FALSE	FALSE	24.11	-0.98	0.0048	0.021	0.59	-0.47	0.14	0.23	0.25	0.42	0.79	0.65
fat	Q9W2S2;Q9VEG5	FBgn0052672	Atg8a	32001	FALSE	FALSE	28.85	-0.17	0.34	0.49	0.027	0.78	0.00022	0.0013	0.00093	0.0085	0.00068	0.99
fat	Q9VQL6	FBgn0042627	FASN2	117361	FALSE	TRUE	34.69	-0.29	0.00034	0.0026	0.86	-0.48	1.1e-06	2.3e-05	0.06	0.16	0.82	0.059
fat	Q7KN61	FBgn0025373	Fpps	36209	FALSE	FALSE	28.19	0.37	0.019	0.058	0.4	0.54	0.0014	0.0059	0.4	0.58	0.79	0.21
fat	Q9VZB2	FBgn0035553	CG13722	38555	FALSE	FALSE	29.11	-0.45	0.00085	0.0053	0.79	-0.25	0.037	0.082	0.23	0.4	0.91	0.19
fat	P02843	FBgn0004045	Yp1	31939	FALSE	FALSE	36.4	0.22	0.063	0.15	0.21	0.045	0.69	0.77	0.28	0.46	0.00014	0.16
fat	Q9VDK7	FBgn0038810	Srp72	42439	FALSE	FALSE	30.98	-0.19	0.011	0.04	0.48	0.08	0.25	0.37	0.011	0.05	0.77	0.24
fat	Q9V4E0;Q9VBR4	FBgn0039909	ND-49	43798	FALSE	FALSE	32.46	-0.27	0.0019	0.01	0.71	0.15	0.055	0.11	0.00082	0.0078	0.38	0.77
fat	Q9VMX4	FBgn0262467	Scox	33711	FALSE	FALSE	29.33	0.48	0.00015	0.0013	0.9	-0.17	0.097	0.18	0.00022	0.003	0.25	0.98
fat	O61722	FBgn0024734	PRL-1	34952	FALSE	TRUE	29.93	-0.38	0.0052	0.022	0.59	-0.44	0.0018	0.0072	0.73	0.84	0.15	0.056
fat	A8JTM7	FBgn0261260	mgl	8674055	FALSE	TRUE	29.01	-0.18	0.037	0.097	0.29	-0.2	0.021	0.051	0.84	0.9	0.91	0.0057
fat	Q8IMX7;Q8IMX7-2	FBgn0039140	Miro	42845	FALSE	FALSE	25.76	0.32	0.038	0.098	0.29	0.81	2.4e-05	0.00023	0.026	0.092	0.66	0.76
fat	P26270	FBgn0002787	Rpn8	37894	FALSE	FALSE	32.24	0.18	0.054	0.13	0.24	-0.42	0.00013	0.0009	0.00012	0.0021	0.67	0.97
fat	Q9VDC1	FBgn0038877	CG3308	42527	FALSE	FALSE	24.59	-0.76	0.28	0.43	0.041	-0.19	0.79	0.85	0.56	0.71	0.094	0.59
fat	P02572	FBgn0000043	Act42A	35526	FALSE	FALSE	27.13	0.89	0.033	0.09	0.31	0.00052	1	1	0.12	0.26	0.16	0.84
fat	Q9VWI2	FBgn0031020	Naa15-16	32934	FALSE	FALSE	30.57	-0.26	0.01	0.037	0.5	-0.5	2.6e-05	0.00025	0.066	0.17	0.12	0.24
fat	Q9VT04;Q9VT03	FBgn0036007	path	39106	FALSE	FALSE	31.09	-0.16	0.095	0.2	0.16	0.075	0.42	0.54	0.084	0.2	0.36	0.21
fat	Q86BQ4;Q8STA5	FBgn0031459	CG2862	33471	FALSE	FALSE	32.11	0.12	0.41	0.56	0.018	0.65	0.00034	0.0019	0.021	0.078	0.033	0.81
fat	Q9VX32;Q9VX32-2	FBgn0026375	RhoGAPp190	32743	FALSE	FALSE	24.35	0.37	0.32	0.47	0.032	1.7	0.0002	0.0013	0.019	0.074	0.31	0.96
fat	P49028	FBgn0002736	mago	37402	FALSE	FALSE	26.76	0.7	0.00011	0.001	0.92	0.34	0.03	0.068	0.084	0.2	0.19	0.55
fat	Q95083	FBgn0016697	Prosalpha5	36951	FALSE	FALSE	32.88	0.076	0.28	0.43	0.042	-0.057	0.41	0.53	0.18	0.35	0.073	0.024
fat	Q9VHN7;Q7KSU6;Q9VVP4	FBgn0037607	CG8036	41027	FALSE	FALSE	35.89	0.086	0.16	0.29	0.091	0.091	0.14	0.23	0.95	0.97	0.23	0.00043
fat	Q9W1F8	FBgn0034935	Orcokinin	37806	FALSE	FALSE	25.89	0.11	0.72	0.81	0.0019	0.31	0.33	0.45	0.66	0.78	0.0043	0.38
fat	Q9U4F3	FBgn0029117	Surf1	44498	FALSE	FALSE	25.09	2.8	0.00097	0.0058	0.78	1.2	0.11	0.19	0.13	0.27	0.034	0.89
fat	Q06849	FBgn0004908	Arl2	40993	FALSE	TRUE	26.54	0.38	0.0038	0.017	0.64	0.26	0.033	0.074	0.48	0.65	0.44	0.087
fat	Q9W2V9	FBgn0028331	l(1)G0289	31964	FALSE	FALSE	27.62	-0.31	0.043	0.11	0.27	0.15	0.31	0.43	0.035	0.11	0.79	0.71
fat	Q9VYL5	FBgn0030403	CG1824	32208	FALSE	FALSE	28.27	-0.33	0.0074	0.029	0.55	-0.11	0.33	0.44	0.17	0.33	0.72	0.23
fat	Q9VJ60	FBgn0032703	CG10343	35127	FALSE	FALSE	26.63	0.32	0.023	0.068	0.38	0.65	8.9e-05	0.00066	0.087	0.21	0.56	0.48
fat	P81928	FBgn0010340	140up	41720	FALSE	FALSE	24.16	0.37	0.29	0.44	0.04	-0.44	0.2	0.31	0.1	0.23	0.32	0.83
fat	Q9VDF7	FBgn0038849	CG7079	42488	FALSE	FALSE	23.22	0.26	0.73	0.82	0.0017	0.77	0.31	0.43	0.63	0.77	0.08	0.56
fat	Q9VY15	FBgn0030582	CG14411	32408	FALSE	FALSE	24.41	-1.2	0.027	0.076	0.35	-0.56	0.26	0.37	0.38	0.56	0.52	0.65
fat	Q9VJ39;Q9VJ39	FBgn0032721	CG10602	35146	FALSE	TRUE	32.35	-0.25	0.019	0.059	0.41	-0.35	0.002	0.0078	0.47	0.64	0.73	0.05
fat	Q9Y0H4;B7YZY9	FBgn0003557	Su(dx)	33379	FALSE	FALSE	26.13	-1.4	0.00096	0.0058	0.79	-0.018	0.96	0.97	0.013	0.056	0.92	0.97
fat	Q9VBS8	FBgn0051370	CG31370	43060	FALSE	FALSE	27.79	0.31	0.049	0.12	0.26	0.89	1.2e-05	0.00014	0.014	0.057	0.12	0.86
fat	P31409;E1JIJ5	FBgn0005671	Vha55	41550	FALSE	FALSE	34.49	-0.079	0.33	0.48	0.031	-0.2	0.018	0.047	0.27	0.45	0.17	0.034
fat	O77410	FBgn0025582	eIF3e	39877	FALSE	FALSE	30.71	0.058	0.47	0.61	0.013	-0.059	0.46	0.57	0.3	0.48	0.13	0.029
fat	Q9W2J4	FBgn0027073	CG4302	37420	FALSE	FALSE	31.02	-0.14	0.097	0.2	0.16	0.63	2.3e-07	6.9e-06	1.8e-06	0.0001	0.24	1
fat	Q7KUK8	FBgn0036433	CG9628	39593	FALSE	FALSE	24.02	-0.2	0.53	0.67	0.0087	0.82	0.017	0.044	0.033	0.11	0.1	0.93
fat	Q8IRQ5;Q9W3X6;Q9W3X5;Q9VTI5;Q8IPD2	FBgn0028336	l(1)G0255	31605	FALSE	FALSE	33.65	0.07	0.22	0.36	0.064	0.074	0.2	0.3	0.96	0.98	0.27	0.00021
fat	Q9W4C4;Q7KVW1	FBgn0263987	spoon	31459	FALSE	FALSE	28.66	-0.4	0.018	0.057	0.42	-0.87	2.7e-05	0.00026	0.047	0.14	0.86	0.71
fat	Q9VV49	FBgn0036622	CG4753	39819	FALSE	FALSE	29.54	-0.14	0.25	0.4	0.053	0.13	0.27	0.38	0.12	0.25	0.43	0.34
fat	Q9VPX7;Q9VPX6	FBgn0261458	capt	45233	FALSE	FALSE	32.52	0.09	0.09	0.19	0.17	0.18	0.0018	0.0073	0.2	0.37	0.062	0.0014
fat	Q9VM19	FBgn0031907	CG5171	34016	FALSE	FALSE	32.35	0.13	0.13	0.24	0.12	0.41	0.00013	0.0009	0.033	0.11	0.013	0.3
fat	Q7K173;A1ZBH0;A1ZBG9	FBgn0034417	CG15117	37197	FALSE	FALSE	26.86	0.18	0.43	0.58	0.017	0.73	0.0043	0.014	0.099	0.22	0.2	0.74
fat	Q9W3X7	FBgn0029888	ND-ASHI	31604	FALSE	FALSE	31.58	0.14	0.13	0.24	0.13	0.42	0.00018	0.0012	0.041	0.13	0.09	0.3
fat	Q9VR81;E1JJR9	FBgn0031099	CG17065	33026	FALSE	FALSE	27.98	0.44	0.055	0.13	0.25	1.6	9.4e-07	2.1e-05	0.0016	0.013	0.53	0.99
fat	Q9VTF8	FBgn0036135	mRpL2	39253	FALSE	FALSE	27.22	-0.06	0.66	0.77	0.0036	-0.33	0.026	0.061	0.18	0.34	0.58	0.35
fat	Q9VZ58	FBgn0030245	CG1637	32019	FALSE	TRUE	28.28	0.42	0.0028	0.014	0.69	0.32	0.017	0.043	0.57	0.72	0.55	0.087
fat	Q9NEF6	FBgn0040377	Vha36-3	31235	FALSE	FALSE	26.43	-0.43	0.021	0.062	0.41	-0.95	2.4e-05	0.00023	0.04	0.12	0.51	0.78
fat	Q9VHF2	FBgn0037683	CG18473	41116	FALSE	FALSE	29.36	0.15	0.29	0.45	0.041	0.97	1.9e-06	3.6e-05	0.00061	0.0064	0.52	0.99
fat	Q8MRM0	FBgn0030484	GstT4	32299	FALSE	FALSE	30.62	0.16	0.074	0.16	0.2	0.4	0.00012	0.00083	0.047	0.14	0.11	0.22
fat	Q7JZE1	FBgn0034058	Pex11	36758	FALSE	TRUE	26.26	-0.27	0.029	0.081	0.35	-0.31	0.012	0.034	0.77	0.87	0.82	0.041
fat	Q9VB46	FBgn0015737	Hmu	43294	FALSE	FALSE	31.3	-0.18	0.04	0.1	0.3	-0.085	0.32	0.44	0.41	0.58	0.44	0.028
fat	P17719	FBgn0004087	Dhfr	42003	FALSE	FALSE	27.65	0.65	0.024	0.07	0.38	0.46	0.094	0.17	0.63	0.76	0.93	0.34
fat	Q9V9A7	FBgn0042083	Mccc2	59261	FALSE	FALSE	30.81	0.13	0.095	0.2	0.17	0.16	0.043	0.092	0.77	0.87	0.79	0.0042
fat	Q9VCH4	FBgn0015513	mbc	42817	FALSE	FALSE	25.07	0.41	0.038	0.099	0.31	0.86	0.0002	0.0012	0.1	0.23	0.51	0.66
fat	Q9VIP8	FBgn0003978	vls	35289	FALSE	FALSE	23.95	-0.52	0.019	0.059	0.42	-0.041	0.84	0.89	0.11	0.25	0.089	0.68
fat	Q9VAY9	FBgn0039555	mRpS22	43345	FALSE	FALSE	29.03	-0.2	0.02	0.062	0.42	0.026	0.75	0.82	0.057	0.16	0.78	0.16
fat	Q9VJ58	FBgn0025608	Faf2	35129	FALSE	FALSE	29.14	0.053	0.66	0.77	0.0038	-0.44	0.0015	0.0063	0.0083	0.041	0.013	0.81
fat	Q9Y1I2;A4V4S5	FBgn0000257	car	32947	FALSE	FALSE	27.3	-0.43	0.0079	0.03	0.56	0.02	0.89	0.93	0.04	0.12	0.2	0.7
fat	Q9VPU8	FBgn0020305	dbe	33269	FALSE	FALSE	24.04	-0.82	0.1	0.2	0.16	-0.89	0.079	0.15	0.93	0.96	0.042	0.34
fat	Q8IGV3	FBgn0037341	CG12746	40672	FALSE	FALSE	22.48	-0.75	0.14	0.27	0.11	-1.4	0.012	0.033	0.38	0.56	0.17	0.66
fat	P55824;P55824-3	FBgn0005632	faf	43749	FALSE	FALSE	28.49	-0.035	0.71	0.8	0.0025	0.15	0.13	0.22	0.18	0.34	0.38	0.12
fat	Q7KVL7;Q9W277	FBgn0034708	Vps35	37536	FALSE	FALSE	29.57	-0.13	0.13	0.25	0.13	-0.15	0.077	0.15	0.83	0.9	0.046	0.0069
fat	Q9W4R8	FBgn0029665	CG14270	31319	FALSE	FALSE	25.34	-3.7	0.029	0.08	0.36	2.2	0.16	0.26	0.014	0.06	0.12	0.99
fat	Q9VJD2	FBgn0032642	CG5110	35055	FALSE	FALSE	29.37	0.14	0.44	0.58	0.018	0.14	0.44	0.56	0.99	1	0.13	0.091
fat	P82384	FBgn0025578	Lcp9	37963	FALSE	FALSE	27.3	-1.4	0.029	0.08	0.36	-1.1	0.07	0.14	0.75	0.85	0.57	0.46
fat	Q9VZX6	FBgn0035374	mRpS35	38345	FALSE	FALSE	27.85	-0.44	0.00049	0.0034	0.85	-0.28	0.016	0.041	0.28	0.45	0.17	0.12
fat	P18091-3;P18091;P18091-2;P18091-5	FBgn0000667	Actn	31166	FALSE	TRUE	34.7	-0.28	0.0018	0.0098	0.75	-0.45	1.5e-05	0.00017	0.13	0.28	0.26	0.064
fat	Q9V3T8	FBgn0265298	SC35	53444	FALSE	FALSE	25.84	-0.46	0.36	0.51	0.03	0.33	0.51	0.62	0.27	0.44	0.22	0.74
fat	Q9V3J1;Q9V3J1-3	FBgn0027779	VhaSFD	34997	FALSE	TRUE	31.94	-0.31	0.0017	0.0093	0.75	-0.25	0.0084	0.025	0.61	0.75	0.57	0.016
fat	Q4TZM6;Q8IP72;Q9VJY9	FBgn0032515	loqs	34751	FALSE	FALSE	25.32	0.82	0.21	0.35	0.076	-0.67	0.3	0.42	0.11	0.25	0.45	0.89
fat	Q9VV41	FBgn0036615	Tcs3	39811	FALSE	TRUE	27.54	-0.28	0.024	0.07	0.4	-0.38	0.0037	0.013	0.54	0.7	0.041	0.076
fat	Q9Y109;REV__Q8MSW4;REV__Q8IQG1-4;REV__Q8IQG1-3;REV__Q8IQG1	FBgn0027549	CG7927	38897	FALSE	FALSE	24.95	0.34	0.47	0.61	0.015	1.1	0.023	0.055	0.23	0.4	0.4	0.76
fat	Q9VCI7	FBgn0039110	RanBP3	42804	FALSE	FALSE	27.35	0.43	0.0077	0.03	0.57	-0.12	0.43	0.54	0.015	0.061	0.14	0.84
fat	P91941	FBgn0020765	Acp65Aa	38710	FALSE	FALSE	35.05	0.25	0.11	0.22	0.16	-0.14	0.36	0.48	0.081	0.2	0.26	0.59
fat	P17133	FBgn0016978	snRNP-U1-70K	33982	FALSE	FALSE	27.35	-0.26	0.053	0.13	0.27	-0.38	0.0068	0.021	0.49	0.66	0.066	0.11
fat	P17210	FBgn0001308	Khc	36810	FALSE	FALSE	31.77	0.12	0.061	0.14	0.24	0.16	0.016	0.042	0.65	0.78	0.36	0.0015
fat	Q9VK20	FBgn0032486	mRF1	34720	FALSE	FALSE	23.74	0.86	0.056	0.13	0.26	0.32	0.45	0.56	0.38	0.56	0.21	0.63
fat	E1JGP0;P53501	FBgn0000044	Act57B	37368	FALSE	FALSE	37.31	0.023	0.78	0.86	0.0013	-0.36	0.00032	0.0018	0.0037	0.024	0.021	0.65
fat	Q9VXH7	FBgn0030740	CG9917	32596	FALSE	TRUE	26.99	-0.32	0.028	0.079	0.37	-0.25	0.076	0.14	0.72	0.84	0.41	0.083
fat	Q7K3W4	FBgn0028622	qsm	47065	FALSE	FALSE	28.51	0.097	0.51	0.66	0.012	-0.25	0.1	0.18	0.11	0.24	0.094	0.51
fat	Q9VH48	FBgn0037770	Art4	41219	FALSE	FALSE	26.06	0.68	0.13	0.24	0.14	-0.018	0.97	0.97	0.26	0.44	0.14	0.72
fat	Q9V9W2;Q9V9W3	FBgn0039857	RpL6	43723	FALSE	FALSE	34.35	0.11	0.1	0.21	0.17	-0.15	0.035	0.077	0.011	0.05	0.13	0.21
fat	A1Z8I8	FBgn0259238	CG42336	36205	FALSE	FALSE	26.47	-1.5	0.015	0.05	0.48	0.13	0.82	0.88	0.055	0.15	0.026	0.94
fat	Q8T3H9;Q9VNC4	FBgn0051550	CG31550	40661	FALSE	FALSE	23.59	1.2	0.03	0.082	0.37	0.78	0.13	0.22	0.58	0.73	0.39	0.53
fat	Q7KMM8;A1Z9W5;A8DYE0;E1JH70;A1Z9W7	FBgn0027596	Kank	36668	FALSE	FALSE	26.58	-0.28	0.15	0.28	0.12	-0.08	0.68	0.76	0.46	0.63	0.11	0.3
fat	Q9W236	FBgn0034744	Vps20	37581	FALSE	FALSE	25.9	-0.21	0.18	0.31	0.095	-0.43	0.0099	0.029	0.3	0.48	0.47	0.3
fat	A1ZA67;A1ZA68;A1ZA70;A1ZA69	FBgn0265045	Strn-Mlck	NA	FALSE	FALSE	29.42	-1.9	0.0082	0.031	0.57	0.13	0.84	0.89	0.038	0.12	0.29	0.96
fat	O46079	FBgn0023521	CG3587	31160	FALSE	FALSE	26.05	-0.5	0.00087	0.0054	0.82	-0.11	0.41	0.53	0.039	0.12	0.32	0.63
fat	Q9XZ16	FBgn0027526	Ublcp1	42726	FALSE	FALSE	25.66	0.41	0.02	0.06	0.44	0.17	0.3	0.42	0.3	0.48	0.17	0.34
fat	Q9W461	FBgn0029820	CG16721	31520	FALSE	FALSE	26.76	-0.54	0.033	0.088	0.35	-0.36	0.14	0.23	0.6	0.74	0.37	0.31
fat	Q9VZL6	FBgn0035469	CG14977	38454	FALSE	FALSE	28.54	-0.22	0.16	0.29	0.11	0.42	0.012	0.033	0.0076	0.039	0.086	0.91
fat	Q9W3J5	FBgn0030007	alpha-PheRS	31740	FALSE	FALSE	30.58	-0.21	0.048	0.12	0.29	-0.24	0.027	0.064	0.85	0.91	0.98	0.019
fat	P46415	FBgn0011768	Fdh	41311	FALSE	FALSE	33.53	0.051	0.42	0.57	0.023	0.22	0.0024	0.0091	0.072	0.18	0.21	0.028
fat	Q5KTT4;Q0E996	FBgn0010488	NAT1	46020	FALSE	TRUE	30.1	-0.22	0.029	0.081	0.38	-0.16	0.089	0.16	0.69	0.81	0.77	0.019
fat	P48611	FBgn0003141	pr	35292	FALSE	FALSE	28.69	-0.043	0.68	0.78	0.0038	0.032	0.75	0.82	0.6	0.75	0.0033	0.038
fat	Q9VKH6	FBgn0032358	Ppt2	34564	FALSE	FALSE	27.8	0.17	0.25	0.39	0.064	-0.047	0.74	0.82	0.29	0.47	0.15	0.27
fat	P83967	FBgn0000047	Act88F	41885	FALSE	FALSE	31.42	-0.76	0.12	0.24	0.15	0.1	0.83	0.88	0.21	0.38	0.25	0.78
fat	Q8SX76	FBgn0051453	pch2	41013	TRUE	FALSE	26.08	2.1	0.0017	0.0092	0.77	-1.2	0.048	0.1	0.00067	0.0068	0.17	1
fat	Q9I7K6	FBgn0037624	CG8223	41045	FALSE	FALSE	28.94	0.39	0.011	0.039	0.53	-0.016	0.91	0.94	0.052	0.15	0.17	0.63
fat	Q26365-2;Q26365;O62526	FBgn0003360	sesB	32007	FALSE	TRUE	36.28	-0.17	0.032	0.086	0.37	0.0096	0.9	0.93	0.099	0.22	0.61	0.073
fat	Q9V426	FBgn0024183	vig	34885	FALSE	FALSE	30.65	-0.097	0.25	0.4	0.063	0.23	0.013	0.037	0.013	0.054	0.025	0.44
fat	Q9W3F3	FBgn0030040	CG15347	31779	FALSE	FALSE	26.68	-0.33	0.13	0.25	0.14	-0.46	0.042	0.091	0.67	0.79	0.18	0.24
fat	Q9Y122	FBgn0027563	CG9631	41729	FALSE	FALSE	25.98	-0.59	0.22	0.37	0.075	-0.8	0.1	0.18	0.75	0.85	0.11	0.43
fat	Q9VLI0	FBgn0032068	LManV	34205	FALSE	FALSE	23.83	3.8	0.0062	0.025	0.62	-0.04	0.97	0.98	0.04	0.12	0.082	0.97
fat	Q9VFE6	FBgn0038275	CG3817	41805	FALSE	FALSE	24.2	-0.68	0.012	0.043	0.52	-0.71	0.0094	0.028	0.93	0.96	0.25	0.19
fat	Q9VZ00	FBgn0030293	CG1737	32077	FALSE	FALSE	27.04	-0.29	0.052	0.13	0.28	-0.31	0.041	0.088	0.93	0.96	0.1	0.058
fat	P14318	FBgn0002789	Mp20	36468	FALSE	FALSE	34.95	-0.01	0.91	0.94	0.0002	0.043	0.63	0.72	0.67	0.8	0.031	0.016
fat	Q9V895;B7YZR7;Q9V895-2;E1JGK5	FBgn0034282	Mapmodulin	37043	FALSE	FALSE	27.46	0.43	0.068	0.15	0.24	-0.27	0.24	0.35	0.039	0.12	0.85	0.87
fat	P29742	FBgn0000319	Chc	32537	FALSE	TRUE	33.99	-0.12	0.014	0.047	0.5	-0.14	0.0057	0.018	0.77	0.86	0.087	3.5e-05
fat	Q9VL66	FBgn0032162	CG4592	34317	FALSE	FALSE	30.14	-0.22	0.26	0.41	0.061	-0.72	0.0011	0.0051	0.071	0.18	0.043	0.73
fat	Q9VJY6	FBgn0032518	RpL24	34754	FALSE	FALSE	33.07	0.21	0.041	0.1	0.33	0.059	0.54	0.65	0.28	0.46	0.12	0.086
fat	P47948	FBgn0010423	TpnC47D	36195	FALSE	FALSE	31.69	0.27	0.03	0.083	0.38	-0.047	0.69	0.77	0.066	0.17	0.17	0.45
fat	Q9V436	FBgn0028693	Rpn12	39845	FALSE	FALSE	31.35	0.39	0.0086	0.032	0.58	0.0081	0.95	0.97	0.056	0.15	0.86	0.59
fat	Q9VI64	FBgn0037472	CG10098	40851	FALSE	FALSE	28.03	-0.15	0.23	0.38	0.072	0.37	0.0073	0.022	0.0076	0.039	0.018	0.84
fat	Q9W3R8	FBgn0029942	CG2059	31663	FALSE	FALSE	29.49	0.12	0.47	0.61	0.018	0.076	0.64	0.73	0.85	0.91	0.09	0.1
fat	Q9VQM4;Q9VQM5	FBgn0260817	gkt	33530	FALSE	FALSE	23.87	0.85	0.073	0.16	0.23	0.045	0.92	0.94	0.22	0.39	0.15	0.76
fat	Q9W3K5;A4V448	FBgn0040319	Gclc	53581	TRUE	FALSE	29	-0.39	0.00024	0.0019	0.91	0.37	0.00038	0.0021	6.2e-06	0.00024	0.3	1
fat	Q9VXG9	FBgn0030745	CG4239	32606	FALSE	FALSE	27.27	-0.51	0.0079	0.03	0.59	-0.38	0.037	0.081	0.61	0.75	0.63	0.19
fat	Q24319	FBgn0014868	Ost48	31849	FALSE	FALSE	30.92	-0.12	0.18	0.31	0.11	-0.24	0.0082	0.025	0.28	0.46	0.74	0.042
fat	Q8IPJ6;Q9Y0Z0	FBgn0259749	mmy	33903	FALSE	FALSE	24.32	0.65	0.18	0.32	0.1	0.051	0.91	0.94	0.38	0.56	0.69	0.65
fat	A1Z8W9;A1Z8W8	FBgn0264560	garz	36337	FALSE	FALSE	24.68	-0.7	0.041	0.1	0.33	-0.4	0.22	0.33	0.51	0.67	0.64	0.46
fat	Q9VP00	FBgn0037114	Cpr78E	40408	FALSE	FALSE	25.14	0.84	0.047	0.12	0.31	1.4	0.0025	0.0093	0.34	0.52	0.63	0.64
fat	Q9VJ12	FBgn0263198	Acn	35173	FALSE	FALSE	27.85	-0.42	0.0057	0.024	0.64	0.11	0.42	0.54	0.012	0.052	0.93	0.84
fat	Q9VDB8	FBgn0038879	CG17298	42529	FALSE	FALSE	29.15	-0.44	0.0089	0.033	0.58	-0.39	0.02	0.049	0.79	0.88	0.39	0.1
fat	H9XVM6;Q9XYM0;H9XVM7;Q95RW2	FBgn0024811	Crk	43775	FALSE	FALSE	28.83	0.18	0.075	0.16	0.23	0.14	0.15	0.25	0.78	0.87	0.34	0.02
fat	Q9VQX6	FBgn0031590	CG3702	33628	FALSE	FALSE	27.24	-0.39	0.011	0.04	0.54	-0.12	0.38	0.49	0.19	0.36	0.28	0.34
fat	Q9VTK9	FBgn0086254	CG6084	39304	FALSE	FALSE	34.78	-0.061	0.38	0.53	0.032	0.47	2e-06	3.8e-05	3.2e-05	0.00079	0.7	0.97
fat	Q8T0R7	FBgn0064237	Idgf5	37104	FALSE	FALSE	27.16	0.12	0.43	0.58	0.024	0.95	4.3e-06	6.3e-05	0.00079	0.0077	0.04	0.99
fat	Q9VVG6	FBgn0052174	CG32174	261607	FALSE	FALSE	24.47	-0.63	0.019	0.059	0.46	0.2	0.43	0.54	0.028	0.096	0.14	0.91
fat	A1ZAZ2	FBgn0034276	Sardh	37026	FALSE	FALSE	23.83	-1	0.0049	0.021	0.66	-0.49	0.14	0.24	0.25	0.42	0.45	0.67
fat	Q8MSS7	FBgn0031639	mRpS2	33688	FALSE	FALSE	25.43	1.2	0.043	0.11	0.33	0.088	0.87	0.91	0.17	0.33	0.93	0.83
fat	Q8T6I0;Q8T8W3	FBgn0016693	Past1	41569	FALSE	FALSE	33.65	-0.095	0.064	0.15	0.26	0.1	0.05	0.1	0.01	0.046	0.025	0.024
fat	Q9VJ80	FBgn0032685	CG10211	35106	FALSE	FALSE	25.96	-0.35	0.066	0.15	0.26	-0.82	0.00025	0.0015	0.082	0.2	0.17	0.69
fat	A1Z6S6;A1Z6S7	FBgn0022960	vimar	35609	FALSE	FALSE	27.11	-0.57	0.0072	0.028	0.61	-0.42	0.036	0.081	0.59	0.74	0.26	0.24
fat	Q9V9S4	FBgn0039886	CG2003	43761	FALSE	FALSE	25.26	0.43	0.13	0.25	0.15	0.83	0.0069	0.021	0.31	0.49	0.46	0.56
fat	Q27606	FBgn0014469	Cyp4e2	35822	FALSE	FALSE	31.29	-0.13	0.22	0.36	0.082	0.39	0.0017	0.007	0.0026	0.019	0.085	0.88
fat	Q9VVX6	FBgn0260857	Bet1	40094	FALSE	FALSE	24.82	-0.22	0.48	0.63	0.017	1	0.005	0.017	0.013	0.055	0.045	0.97
fat	E1JH76;Q9BJZ5-3;Q9BJZ5;E2QCE8;Q9BJZ5-2;Q9BJZ5-4	FBgn0023441	fus	44095	FALSE	FALSE	27.94	-0.4	0.019	0.06	0.46	-0.17	0.29	0.41	0.31	0.49	0.19	0.31
fat	Q8SZB7	FBgn0047178	CG32147	251690	FALSE	FALSE	26.93	-0.3	0.085	0.18	0.22	0.21	0.23	0.34	0.043	0.13	0.64	0.76
fat	B7Z103;B7Z100;Q9VWV0	FBgn0259223	CG42323	32825	FALSE	FALSE	29.66	0.57	0.01	0.037	0.56	1.6	2.9e-07	8.4e-06	0.002	0.015	0.37	0.99
fat	A1Z830;A1Z831	FBgn0033473	CG12128	36042	FALSE	FALSE	26.13	1.5	0.08	0.17	0.23	-0.77	0.36	0.48	0.064	0.17	0.047	0.94
fat	Q8MRW1;A8Y4U9	FBgn0058042	Tim23	3355096	FALSE	FALSE	27.96	0.52	0.00037	0.0028	0.89	0.0027	0.98	0.99	0.0065	0.034	0.77	0.85
fat	Q9VCG3	FBgn0039126	CG13601	42826	FALSE	FALSE	27.3	-0.32	0.069	0.15	0.25	0.28	0.11	0.2	0.02	0.076	0.041	0.86
fat	Q7K7G0;Q9W555	FBgn0028969	deltaCOP	45250	FALSE	FALSE	30.39	-0.13	0.078	0.17	0.23	0.047	0.5	0.61	0.088	0.21	0.74	0.054
fat	Q9VFB5	FBgn0051155	Rpb7	261631	FALSE	FALSE	25.48	-0.17	0.25	0.4	0.069	-0.39	0.013	0.036	0.28	0.46	0.0029	0.28
fat	Q9NBD7	FBgn0021760	chb	43901	FALSE	TRUE	26.22	-0.29	0.024	0.07	0.43	-0.36	0.0077	0.023	0.71	0.83	0.62	0.057
fat	Q9VC57	FBgn0039213	atl	42934	FALSE	FALSE	29.61	-0.25	0.056	0.13	0.29	-0.52	0.00048	0.0025	0.13	0.28	0.17	0.34
fat	P09491	FBgn0004117	Tm2	41853	FALSE	FALSE	27.23	-0.12	0.7	0.8	0.0037	0.44	0.18	0.28	0.22	0.39	0.013	0.69
fat	Q9VQU0	FBgn0031563	CG10031	33594	FALSE	FALSE	25.78	-1.1	0.12	0.24	0.16	1.8	0.017	0.044	0.0077	0.039	0.04	0.99
fat	Q7K1W8	FBgn0031673	CG31650	326150	FALSE	FALSE	24.38	0.26	0.27	0.42	0.063	0.69	0.0067	0.021	0.19	0.35	0.02	0.61
fat	Q9W4K8	FBgn0029706	CG3626	31377	FALSE	FALSE	28.28	-0.43	0.0084	0.032	0.6	0.06	0.68	0.77	0.028	0.098	0.49	0.76
fat	Q9VTE9	FBgn0261112	APP-BP1	39244	FALSE	FALSE	26.71	0.24	0.081	0.17	0.23	0.014	0.92	0.94	0.23	0.41	0.1	0.28
fat	Q9VKB2	FBgn0032409	Ced-12	34633	FALSE	FALSE	25.73	-0.64	0.0055	0.023	0.65	-0.37	0.084	0.16	0.36	0.54	0.39	0.4
fat	Q9VJQ6	FBgn0040228	DCTN5-p25	34873	FALSE	FALSE	24.66	-0.63	0.083	0.18	0.22	1.4	0.00074	0.0035	0.00058	0.0061	0.37	1
fat	Q7K2X8	FBgn0033247	Nup44A	35762	FALSE	FALSE	28.29	-0.15	0.2	0.34	0.093	-0.61	5.3e-05	0.00044	0.012	0.051	0.39	0.76
fat	Q9VQR8	FBgn0053123	LeuRS	326262	FALSE	FALSE	30.6	0.062	0.41	0.56	0.027	-0.13	0.093	0.17	0.081	0.2	0.046	0.085
fat	Q7PLL6;D2A6J9;D2A6J8;D2A6K0	FBgn0039959	CG17514	3355040	FALSE	FALSE	31.73	-0.21	0.0049	0.021	0.67	-0.43	3.5e-06	5.4e-05	0.027	0.093	0.21	0.11
fat	O18333	FBgn0014009	Rab2	35577	FALSE	FALSE	30.2	0.11	0.16	0.29	0.13	0.0072	0.92	0.95	0.34	0.52	0.09	0.016
fat	Q7KVY7	FBgn0024980	Syx4	31269	FALSE	FALSE	26.11	-0.35	0.051	0.12	0.31	-0.13	0.44	0.55	0.37	0.55	0.04	0.31
fat	Q9VTB4	FBgn0047038	ND-13B	39214	FALSE	FALSE	32.28	-0.35	0.055	0.13	0.29	0.019	0.92	0.94	0.14	0.29	0.27	0.55
fat	Q9VGP4	FBgn0037894	Ranbp9	41367	FALSE	FALSE	29.27	0.23	0.0082	0.031	0.6	-0.0097	0.9	0.93	0.042	0.13	0.076	0.18
fat	Q8SXJ8	FBgn0040010	CG17493	NA	FALSE	FALSE	24.22	-2.3	0.0035	0.016	0.71	-0.36	0.61	0.7	0.059	0.16	0.84	0.94
fat	Q9VLH9;Q9VLI2	FBgn0032069	LManVI	34206	FALSE	FALSE	25.76	2.3	0.044	0.11	0.34	-1.2	0.25	0.36	0.029	0.1	0.018	0.98
fat	Q0KIE7	FBgn0011747	Ank	43770	FALSE	TRUE	31.57	-0.34	1.4e-05	0.00022	0.98	-0.34	1.2e-05	0.00014	0.94	0.97	0.28	0.00031
fat	Q27601	FBgn0004901	Prat	40935	FALSE	FALSE	24.37	0.66	0.12	0.24	0.17	-0.78	0.074	0.14	0.023	0.084	0.026	0.96
fat	Q9VB10	FBgn0039537	CG5590	43325	FALSE	FALSE	32.53	0.13	0.17	0.3	0.12	0.43	0.00017	0.0011	0.031	0.1	0.2	0.38
fat	A8JRA6;Q9VBY8	FBgn0266719	stac	43002	FALSE	FALSE	28.38	-0.26	0.069	0.16	0.26	-0.22	0.12	0.2	0.84	0.9	0.081	0.062
fat	Q9W2K4;A8DYK5	FBgn0034598	CG4266	37411	FALSE	FALSE	24.26	-0.4	0.17	0.3	0.12	0.14	0.62	0.71	0.19	0.35	0.27	0.69
fat	Q8STG9	FBgn0086357	Sec61alpha	33905	FALSE	FALSE	29.95	-0.57	4.8e-05	0.00054	0.96	-0.77	1.3e-06	2.7e-05	0.21	0.38	0.3	0.18
fat	A1Z9N0;Q95U20	FBgn0261276	Opa1	36578	FALSE	FALSE	30.22	0.1	0.24	0.39	0.079	0.13	0.13	0.22	0.79	0.88	0.25	0.0082
fat	P62152	FBgn0000253	Cam	36329	FALSE	FALSE	32.73	0.1	0.068	0.15	0.27	0.3	2.2e-05	0.00022	0.016	0.065	0.11	0.04
fat	Q9VVT2;Q9VVT2-2;E1JI19	FBgn0036816	Indy	40049	FALSE	FALSE	29.9	-0.052	0.53	0.67	0.014	0.48	1.6e-05	0.00017	0.00023	0.0032	0.012	0.94
fat	Q9W1E8	FBgn0003008	or	43943	FALSE	TRUE	25.39	0.27	0.022	0.067	0.46	0.16	0.16	0.26	0.47	0.64	0.54	0.071
fat	Q9W3D2;Q9W3D3	FBgn0025864	Crag	31800	FALSE	FALSE	25.97	-0.081	0.64	0.76	0.0066	-0.21	0.24	0.35	0.6	0.74	0.36	0.2
fat	Q9VG44	FBgn0038072	CG6225	41559	FALSE	FALSE	28.91	-0.5	0.017	0.054	0.51	-0.45	0.03	0.069	0.84	0.9	0.5	0.15
fat	Q9VCE2	FBgn0043455	CG5986	192506	FALSE	FALSE	23.42	0.75	0.094	0.19	0.22	0.64	0.15	0.25	0.85	0.91	0.53	0.36
fat	Q9VLJ8	FBgn0032054	Uba4	34187	FALSE	FALSE	24.57	0.65	0.11	0.21	0.19	-0.16	0.68	0.77	0.15	0.3	0.58	0.8
fat	Q9VWP1	FBgn0030969	Usp39	32881	FALSE	FALSE	25.81	0.44	0.047	0.12	0.33	-0.34	0.12	0.2	0.016	0.064	0.066	0.92
fat	Q9VLY1	FBgn0031940	CG7214	34053	FALSE	FALSE	33.46	0.72	0.0007	0.0045	0.86	1.3	8.5e-07	2e-05	0.032	0.11	0.32	0.83
fat	P39205	FBgn0000316	cin	30973	FALSE	FALSE	28.87	0.26	0.042	0.11	0.36	0.022	0.85	0.9	0.17	0.33	0.2	0.26
fat	Q7KT70;Q8IP36	FBgn0001987	Gli	34927	FALSE	FALSE	26.17	0.33	0.03	0.083	0.41	0.49	0.0028	0.01	0.44	0.62	0.68	0.18
fat	Q9VQR2	FBgn0021967	ND-PDSW	44228	FALSE	FALSE	31.75	-0.11	0.27	0.42	0.069	-0.2	0.058	0.12	0.54	0.7	0.07	0.043
fat	Q9VBH7	FBgn0039407	CG14544	43170	FALSE	FALSE	27.12	-0.34	0.055	0.13	0.31	-0.72	0.00045	0.0024	0.13	0.27	0.18	0.56
fat	Q9VM71	FBgn0031868	Rat1	33964	FALSE	FALSE	28.24	-0.24	0.043	0.11	0.35	-0.47	0.0004	0.0022	0.14	0.29	0.24	0.26
fat	Q8SX83-4;Q8SX83-2;Q8SX83-3;Q8SX83	FBgn0016977	spen	44205	FALSE	FALSE	31.46	0.11	0.4	0.56	0.032	0.57	0.00028	0.0016	0.019	0.073	0.67	0.75
fat	Q9VJ98	FBgn0032670	CG5783	35088	FALSE	FALSE	25.47	-0.84	0.076	0.17	0.26	2.2	0.00013	0.00088	0.00016	0.0024	0.27	1
fat	Q9V444	FBgn0043002	Chrac-14	3772329	FALSE	FALSE	23.33	1.3	0.017	0.055	0.51	-0.91	0.079	0.15	0.0053	0.03	0.081	0.99
fat	Q9VCU1	FBgn0039024	CG4721	42701	FALSE	FALSE	29.52	-0.19	0.057	0.14	0.31	0.057	0.56	0.66	0.08	0.2	0.14	0.26
fat	P49858	FBgn0000339	cni	34967	FALSE	FALSE	26.14	-1.1	0.0058	0.024	0.67	0.014	0.97	0.97	0.038	0.12	0.9	0.93
fat	B7YZY5;B7YZY4;B7YZY3;B7YZY1;Q9VIF9;B7YZY2	FBgn0040297	Nhe2	35376	FALSE	FALSE	23.04	-0.63	0.14	0.26	0.16	0.049	0.91	0.93	0.25	0.43	0.61	0.72
fat	Q7K012	FBgn0025716	Bap55	36956	FALSE	FALSE	28	0.19	0.098	0.2	0.22	0.1	0.35	0.47	0.58	0.73	0.021	0.058
fat	Q8IRY7-3;Q8IRY7-4;Q8IRY7-2;Q8IRY7	FBgn0020381	Dredd	31011	FALSE	FALSE	25.03	-0.98	0.0019	0.0099	0.8	-1	0.0012	0.0053	0.89	0.93	0.64	0.23
fat	Q9U1M2;A4V3W8	FBgn0040384	CG32795	31270	FALSE	FALSE	28.55	0.11	0.4	0.55	0.034	0.16	0.2	0.3	0.74	0.85	0.02	0.062
fat	Q9W1V3	FBgn0003062	Fib	37662	FALSE	FALSE	32.11	0.088	0.2	0.34	0.11	-0.39	1.7e-05	0.00018	8.4e-05	0.0015	0.029	0.92
fat	Q9VS39	FBgn0035755	CG14830	38800	FALSE	FALSE	26.46	-0.19	0.24	0.39	0.083	-0.55	0.0023	0.0088	0.11	0.25	0.1	0.55
fat	Q9VCH7	FBgn0039118	CG10208	42814	TRUE	FALSE	28.4	-0.52	0.0025	0.013	0.77	0.79	4.4e-05	0.00037	6.8e-06	0.00025	0.7	1
fat	Q9VJ33	FBgn0032725	Nedd8	35151	FALSE	FALSE	28.44	1.1	0.0055	0.023	0.68	0.14	0.69	0.77	0.067	0.17	0.89	0.88
fat	Q7KRI2;E1JGK7	FBgn0022238	lolal	44703	FALSE	FALSE	26.39	-0.25	0.24	0.38	0.087	-0.19	0.36	0.48	0.84	0.9	0.046	0.17
fat	B7Z0Q5	FBgn0250757	CG42235	43136	TRUE	FALSE	23.64	-2.2	0.0029	0.014	0.75	1.1	0.12	0.21	0.0022	0.016	0.98	1
fat	Q9VUL1;Q9VUL1-2	FBgn0266452	CTPsyn	39645	FALSE	FALSE	27.89	0.22	0.062	0.14	0.3	-0.45	0.00071	0.0034	0.00044	0.005	0.014	0.97
fat	E1JI52;Q86BH1;E1JI49;E1JIE2;E1JIE3;E1JIE1;E1JI50;Q8MT89;E1JIE0;E1JID9;E1JI51	FBgn0260660	Mp	38769	FALSE	FALSE	27.77	0.25	0.12	0.23	0.19	0.33	0.038	0.083	0.68	0.8	0.81	0.12
fat	Q9VW40	FBgn0036908	TORIP	40158	FALSE	FALSE	27.46	0.29	0.022	0.065	0.48	-0.033	0.78	0.84	0.063	0.17	0.55	0.45
fat	Q7JZN0	FBgn0010638	Sec61beta	46080	FALSE	FALSE	29.52	0.053	0.8	0.87	0.0019	0.34	0.11	0.19	0.32	0.5	0.0076	0.43
fat	Q9VPR5	FBgn0031266	Sf3b1	33235	FALSE	FALSE	28.19	0.18	0.11	0.22	0.2	-0.54	0.00012	0.00084	0.00021	0.003	0.27	0.99
fat	Q9VTC1	FBgn0036104	CG6418	39218	FALSE	FALSE	24.04	-0.58	0.25	0.4	0.082	1.2	0.025	0.059	0.019	0.074	0.23	0.97
fat	P32234	FBgn0010339	128up	36288	FALSE	FALSE	30.86	-0.2	0.059	0.14	0.31	-0.49	9.4e-05	0.00069	0.048	0.14	0.012	0.37
fat	Q7K519	FBgn0033272	RagC-D	35793	FALSE	FALSE	29.18	-0.11	0.46	0.61	0.025	0.5	0.0029	0.011	0.0083	0.041	0.33	0.9
fat	Q9VDZ4	FBgn0259704	Nsun5	7354421	FALSE	FALSE	23	-0.99	0.033	0.088	0.42	-0.49	0.27	0.38	0.42	0.59	0.37	0.6
fat	Q9VD07	FBgn0038968	CG12499	42637	FALSE	FALSE	23.56	0.72	0.11	0.22	0.2	-4.5	4.7e-09	3.4e-07	9.2e-08	1.7e-05	0.2	1
fat	Q9NFU0-2;Q9NFU0-3;Q9NFU0-4	FBgn0028734	Fmr1	37528	FALSE	FALSE	29.33	0.34	0.0037	0.017	0.74	-0.35	0.0026	0.0098	0.00014	0.0023	0.43	0.99
fat	Q9VTX3	FBgn0052103	CG32103	39415	FALSE	FALSE	27.89	-0.15	0.45	0.59	0.028	0.1	0.59	0.69	0.36	0.54	0.13	0.37
fat	P18489-4;P18489-3;P18489-2;P18489	FBgn0003660	Syb	36080	FALSE	FALSE	29.15	-0.077	0.53	0.67	0.017	0.41	0.0033	0.012	0.011	0.049	0.068	0.8
fat	Q9I7L5	FBgn0015569	alpha-Est10	40896	FALSE	FALSE	26.65	-0.77	0.00052	0.0036	0.89	-0.31	0.11	0.19	0.09	0.21	0.21	0.68
fat	Q95028	FBgn0001258	Ldh	45880	FALSE	FALSE	32.26	0.23	0.098	0.2	0.23	0.38	0.0097	0.028	0.42	0.6	0.03	0.16
fat	P54358	FBgn0263600	DNApol-delta	39746	FALSE	FALSE	23.92	-1	0.11	0.22	0.2	-2.7	0.00032	0.0018	0.065	0.17	0.049	0.93
fat	Q9VNE0	FBgn0037344	CG2926	40676	FALSE	FALSE	23.63	-0.29	0.15	0.27	0.16	-0.19	0.32	0.44	0.73	0.84	0.67	0.19
fat	Q9V9R4;Q8IMF4;Q8IMF3;Q2PDP3	FBgn0032955	CG2201	35417	FALSE	FALSE	28.78	-0.16	0.15	0.27	0.16	-0.054	0.61	0.7	0.5	0.66	0.18	0.06
fat	Q9VS46	FBgn0035762	Rint1	38807	FALSE	FALSE	24.09	-1.3	0.017	0.054	0.54	-0.28	0.58	0.68	0.16	0.31	0.15	0.83
fat	Q9VDI1	FBgn0053094	Synd	42467	FALSE	FALSE	30.17	-0.14	0.066	0.15	0.3	-0.053	0.47	0.58	0.4	0.57	0.12	0.012
fat	Q7K3U4	FBgn0033079	Fmo-2	35561	FALSE	FALSE	30.25	-0.021	0.81	0.88	0.0018	0.46	3.9e-05	0.00035	0.00083	0.0079	0.01	0.87
fat	Q9W303	FBgn0026415	Idgf4	31926	FALSE	FALSE	33.63	-0.12	0.12	0.24	0.19	-0.0038	0.96	0.97	0.28	0.46	0.032	0.023
fat	O46037	FBgn0004397	Vinc	31201	FALSE	FALSE	32.77	0.12	0.091	0.19	0.24	-0.15	0.036	0.08	0.01	0.048	0.53	0.26
fat	Q9VV13	FBgn0036590	CG13065	39786	FALSE	FALSE	25.4	-0.53	0.014	0.047	0.57	-0.83	0.00048	0.0025	0.29	0.47	0.38	0.44
fat	Q9V3Z6	FBgn0000317	ck	34882	FALSE	FALSE	26.17	-1	0.017	0.053	0.54	-1.6	0.00076	0.0036	0.33	0.51	0.68	0.64
fat	Q9VSS1	FBgn0086706	pix	39027	FALSE	FALSE	30.56	-0.1	0.24	0.39	0.091	-0.19	0.035	0.078	0.46	0.63	0.12	0.024
fat	Q7K3V6	FBgn0033184	mEFTu2	35681	FALSE	FALSE	27.79	0.25	0.023	0.069	0.49	-0.092	0.37	0.49	0.027	0.095	0.84	0.5
fat	Q7KY08;Q32KD4	FBgn0262739	AGO1	36544	FALSE	FALSE	28.85	-0.22	0.063	0.14	0.31	-0.25	0.034	0.076	0.83	0.9	0.74	0.033
fat	Q9VX44;Q8MQX9	FBgn0028343	Ankle2	32732	FALSE	FALSE	26.2	-1.3	0.21	0.35	0.11	0.93	0.37	0.49	0.13	0.28	0.021	0.9
fat	Q9VS47	FBgn0035763	CG8602	38808	FALSE	FALSE	28.35	0.44	0.12	0.23	0.2	0.92	0.0034	0.012	0.23	0.41	0.59	0.63
fat	Q9VG01;A1A735	FBgn0038111	CG46280	41603	FALSE	FALSE	26.35	0.56	0.0068	0.027	0.67	0.78	0.00054	0.0028	0.43	0.6	0.52	0.31
fat	P46150-2;P46150;P46150-3;P46150-4;P46150-5	FBgn0011661	Moe	31816	FALSE	FALSE	32.37	-0.13	0.052	0.13	0.35	-0.22	0.0024	0.0091	0.32	0.5	0.37	0.0047
fat	O96692;Q2MGM2	FBgn0025806	Rap2l	37850	FALSE	FALSE	27.51	-0.13	0.38	0.54	0.043	-0.17	0.25	0.37	0.84	0.9	0.077	0.085
fat	P41043;A4UZL5	FBgn0010226	GstS1	36927	FALSE	FALSE	32.57	-0.55	0.075	0.16	0.28	0.3	0.32	0.44	0.054	0.15	0.39	0.88
fat	Q9VRL2	FBgn0260856	Membrin	38614	FALSE	FALSE	24.56	-0.31	0.21	0.35	0.11	-0.57	0.03	0.068	0.46	0.63	0.15	0.4
fat	P52304	FBgn0003124	polo	40232	FALSE	FALSE	26.74	1.2	0.026	0.075	0.47	-0.33	0.5	0.61	0.041	0.13	0.18	0.95
fat	Q9U1L2	FBgn0040349	CG3699	31046	FALSE	FALSE	32.34	-0.26	0.012	0.043	0.59	0.045	0.64	0.73	0.034	0.11	0.54	0.41
fat	Q0E908	FBgn0050147	Hil	37328	FALSE	FALSE	27.29	-0.26	0.085	0.18	0.26	-0.12	0.43	0.54	0.49	0.65	0.19	0.18
fat	Q9W3M8	FBgn0260858	Ykt6	31706	FALSE	FALSE	27.46	0.12	0.56	0.69	0.016	0.41	0.049	0.1	0.3	0.48	0.13	0.44
fat	Q4V645	FBgn0038343	Trissin	41890	FALSE	FALSE	23.81	1.6	0.015	0.05	0.57	0.65	0.28	0.4	0.28	0.45	0.28	0.76
fat	Q7KSF4;Q9VEN1;Q9VEN1	FBgn0014141	cher	42066	FALSE	TRUE	34.24	-0.2	0.00095	0.0057	0.87	-0.21	0.00073	0.0035	0.93	0.96	0.58	0.0001
fat	Q9VNF3;Q9VNF4	FBgn0037354	CG12171	40690	FALSE	FALSE	32.31	0.13	0.13	0.24	0.2	0.5	8.2e-06	0.00011	0.0045	0.027	0.78	0.6
fat	Q9VRX7	FBgn0035707	Rexo5	38740	FALSE	FALSE	25.99	-0.46	0.17	0.3	0.15	-1.1	0.0034	0.012	0.19	0.35	0.15	0.73
fat	Q9VJ74	FBgn0032690	CG10333	35112	FALSE	FALSE	26.05	1.1	0.035	0.094	0.43	-1.1	0.051	0.11	0.0064	0.034	0.24	0.99
fat	P35875;P35875-3;P35875-2	FBgn0010247	Parp	3355109	FALSE	FALSE	23.5	0.14	0.86	0.91	0.001	-1.1	0.16	0.26	0.26	0.44	0.034	0.79
fat	Q9VW37	FBgn0261283	SREBP	40155	FALSE	FALSE	24.83	-1.4	0.048	0.12	0.37	-0.67	0.31	0.43	0.45	0.62	0.55	0.65
fat	Q9VC05	FBgn0020626	Osbp	42985	FALSE	FALSE	28.82	-0.38	0.0066	0.026	0.69	0.032	0.8	0.86	0.03	0.1	0.43	0.66
fat	P16568	FBgn0000183	BicD	35051	FALSE	FALSE	26.71	0.48	0.015	0.048	0.58	-0.33	0.077	0.15	0.0046	0.027	0.67	0.96
fat	Q9VXE3	FBgn0026181	Rok	43916	FALSE	FALSE	26.94	-0.34	0.067	0.15	0.31	-0.052	0.77	0.83	0.26	0.43	0.88	0.41
fat	Q7K860	FBgn0033027	TpnC4	35498	FALSE	FALSE	30.12	-1.3	0.036	0.095	0.42	-0.1	0.85	0.9	0.16	0.31	0.22	0.84
fat	Q8MMC4-2	FBgn0022343	CG3760	37987	FALSE	FALSE	30.77	0.14	0.12	0.23	0.21	0.47	4.4e-05	0.00038	0.017	0.066	0.75	0.46
fat	P22817	FBgn0001247	Ide	40248	FALSE	FALSE	29.94	0.044	0.71	0.8	0.0058	0.018	0.88	0.91	0.88	0.93	0.0035	0.036
fat	Q9VCK0;Q9VGC7	FBgn0040227	eIF3d1	42789	FALSE	FALSE	31.64	-0.078	0.34	0.49	0.059	-0.23	0.011	0.031	0.2	0.37	0.43	0.051
fat	Q9VLP5	FBgn0032018	CG7806	34140	FALSE	FALSE	24.39	-2	0.0062	0.025	0.7	-1.3	0.054	0.11	0.47	0.64	0.22	0.64
fat	Q9VVJ7	FBgn0036745	CG7484	39969	FALSE	FALSE	27.29	0.16	0.43	0.58	0.036	0.23	0.27	0.38	0.81	0.89	0.24	0.18
fat	Q9XZ10;Q8IML5;Q8IML3;Q8IML4;Q6NLA3	FBgn0028671	Vha100-1	43442	FALSE	FALSE	29.97	-0.17	0.027	0.076	0.48	-0.4	2.3e-05	0.00022	0.032	0.11	0.47	0.14
fat	Q8SWU4	FBgn0031306	CG4577	33291	FALSE	FALSE	27.69	-0.21	0.077	0.17	0.29	0.19	0.11	0.19	0.022	0.081	0.62	0.64
fat	Q9VJ99	FBgn0032669	CG15155	35087	FALSE	FALSE	24.12	-1.8	0.0032	0.015	0.78	-1.9	0.0021	0.0082	0.9	0.94	0.46	0.37
fat	O76511	FBgn0024920	Ts	33499	FALSE	FALSE	23.78	1.3	0.14	0.26	0.19	0.27	0.75	0.82	0.4	0.57	0.042	0.71
fat	Q9W429;A4V408	FBgn0029849	Efr	31553	FALSE	FALSE	24.58	-0.83	0.00072	0.0047	0.89	-0.31	0.14	0.24	0.088	0.21	0.81	0.73
fat	Q9VVS6	FBgn0036813	Atg3	40044	FALSE	FALSE	29.47	-0.17	0.099	0.2	0.25	0.93	2.6e-08	1.2e-06	3.3e-07	3.7e-05	0.081	1
fat	Q95SH7	FBgn0035440	CG14969	38415	FALSE	FALSE	27.28	0.43	0.18	0.31	0.15	0.088	0.78	0.84	0.44	0.61	0.35	0.5
fat	Q9W459	FBgn0029821	CG4020	31522	FALSE	FALSE	32.87	-0.068	0.47	0.62	0.029	-0.27	0.0092	0.027	0.14	0.29	0.4	0.16
fat	Q9VG81	FBgn0038038	CG5167	41521	FALSE	FALSE	33.69	-0.14	0.071	0.16	0.31	0.25	0.0026	0.0097	0.0013	0.011	0.23	0.66
fat	A1ZAX1	FBgn0034258	eIF3c	37005	FALSE	FALSE	31.77	-0.076	0.23	0.37	0.11	-0.54	5.9e-08	2.3e-06	3.9e-05	0.00091	0.089	0.92
fat	C0PV74;Q9VYS0	FBgn0030357	Sclp	32156	FALSE	FALSE	23.99	-0.93	0.12	0.23	0.22	-1.3	0.029	0.067	0.62	0.76	0.14	0.53
fat	Q0E9Q5;Q7PLI0	FBgn0260799	p120ctn	NA	FALSE	FALSE	23.18	-1.1	0.032	0.088	0.46	-1.7	0.0031	0.011	0.45	0.62	0.5	0.61
fat	Q9VVM1	FBgn0036765	CG7408	39991	FALSE	FALSE	23.69	0.47	0.33	0.48	0.067	0.64	0.19	0.29	0.8	0.88	0.46	0.4
fat	Q9W397	FBgn0030081	CG7246	31833	FALSE	FALSE	23.49	-0.28	0.51	0.65	0.024	-0.88	0.047	0.099	0.31	0.49	0.0035	0.67
fat	Q9W1M9	FBgn0034879	Rrp4	37731	FALSE	FALSE	26.51	-0.66	0.00097	0.0058	0.88	-0.72	0.00045	0.0024	0.81	0.89	0.22	0.12
fat	Q7JR83	FBgn0034491	Hsl	37289	FALSE	FALSE	24.12	-1.1	0.019	0.058	0.55	-1.2	0.015	0.04	0.94	0.97	0.77	0.32
fat	Q7K2N0	FBgn0033309	Lnpk	35842	FALSE	FALSE	27.75	-0.13	0.25	0.4	0.1	-0.074	0.52	0.63	0.71	0.83	0.0044	0.049
fat	Q9VTW8	FBgn0036279	Ncc69	39410	FALSE	FALSE	27.53	-0.13	0.61	0.74	0.013	-1.2	0.00022	0.0013	0.0094	0.045	0.035	0.97
fat	Q8IQQ1	FBgn0036678	CG11905	39895	FALSE	FALSE	24.88	1	0.0039	0.018	0.76	0.65	0.048	0.1	0.41	0.58	0.46	0.52
fat	Q94547-2;Q94547	FBgn0017550	Rga	40683	FALSE	FALSE	26.32	0.15	0.15	0.28	0.18	-0.25	0.02	0.049	0.01	0.047	0.93	0.66
fat	Q9VPW9	FBgn0031304	CG4552	33289	FALSE	FALSE	24.12	-0.8	0.03	0.082	0.48	-0.73	0.045	0.095	0.89	0.93	0.36	0.29
fat	Q9VWJ2;A8JUR0	FBgn0031010	CG8028	32923	TRUE	FALSE	24.02	0.95	0.0021	0.011	0.82	-0.39	0.15	0.25	0.0021	0.016	0.48	0.99
fat	Q9VEK7;Q8IN97	FBgn0025456	CREG	42092	FALSE	FALSE	31.98	0.094	0.22	0.36	0.12	0.56	6.3e-07	1.6e-05	0.00032	0.004	0.18	0.88
fat	P42283;P42284-1;P42284-3;Q867Z4-3;P42284;Q867Z4-2;Q867Z4-5;Q9V5M3-5;Q9V5M3-4;Q9V5M6-3;Q7KQZ4-4;Q9V5M6-5;Q9V5M3-2;Q7KQZ4-2;Q9V5M6-4;Q7KQZ4-3;Q9V5M6-2;Q9V5M3-3;Q7KQZ4;Q9V5M3;Q9V5M6;Q867Z4	FBgn0005630	lola	44548	FALSE	FALSE	27.4	-0.31	0.072	0.16	0.32	-0.4	0.026	0.061	0.72	0.83	0.56	0.14
fat	Q7K561	FBgn0033917	SmydA-1	36581	FALSE	FALSE	24.06	-0.41	0.29	0.44	0.086	-0.069	0.86	0.9	0.52	0.69	0.014	0.5
fat	Q7K1I4	FBgn0029508	Tsp42Ea	59178	FALSE	FALSE	25.5	-0.52	0.038	0.099	0.44	-0.73	0.0058	0.019	0.53	0.69	0.67	0.35
fat	Q9VC87	FBgn0039189	CG18528	42906	FALSE	FALSE	23.4	0.54	0.13	0.25	0.21	0.84	0.025	0.059	0.54	0.7	0.028	0.47
fat	P53777;B7YZP9	FBgn0259209	Mlp60A	37853	FALSE	FALSE	33.34	0.11	0.37	0.52	0.057	0.42	0.0019	0.0074	0.07	0.18	0.33	0.43
fat	O76928	FBgn0000330	cm	31647	FALSE	FALSE	25.86	-0.39	0.034	0.091	0.46	-0.11	0.51	0.62	0.26	0.44	0.89	0.4
fat	P06742-2	FBgn0002772	Mlc1	43323	FALSE	FALSE	24.1	-0.86	0.42	0.57	0.043	-1.9	0.087	0.16	0.5	0.66	0.033	0.67
fat	P08266	FBgn0262955	RpII140	41721	FALSE	FALSE	29.19	0.16	0.13	0.24	0.22	-0.3	0.0083	0.025	0.0047	0.027	0.15	0.8
fat	Q9W5W7	FBgn0031093	CG9581	33017	FALSE	FALSE	26.55	-0.54	0.0056	0.023	0.73	0.23	0.19	0.3	0.0052	0.03	0.69	0.95
fat	Q95RU0	FBgn0011204	cue	38174	FALSE	FALSE	26.67	-0.68	0.015	0.048	0.6	-0.4	0.13	0.21	0.45	0.62	0.22	0.43
fat	Q8MSV2-3;Q8MSV2-4;Q8MSV2;Q8MSV2;Q8MSV2-2	FBgn0052423	shep	38605	FALSE	FALSE	27.35	0.3	0.022	0.066	0.54	0.079	0.51	0.62	0.21	0.38	0.29	0.24
fat	Q9VW10	FBgn0036886	CG9300	40128	FALSE	FALSE	25.39	-0.081	0.61	0.73	0.014	-0.78	9.3e-05	0.00068	0.0052	0.03	0.00078	0.94
fat	Q0E8X7	FBgn0250838	roh	246602	FALSE	FALSE	31.87	-0.1	0.4	0.55	0.049	-0.12	0.32	0.44	0.92	0.95	0.0056	0.033
fat	P91929;A4V383	FBgn0019957	ND-42	42591	FALSE	FALSE	32.95	-0.12	0.092	0.19	0.28	0.027	0.71	0.78	0.14	0.29	0.44	0.035
fat	Q9VND7	FBgn0037342	CG2931	40673	FALSE	FALSE	23.98	0.34	0.18	0.32	0.16	0.45	0.09	0.17	0.78	0.87	0.094	0.25
fat	Q7KJA9	FBgn0261403	sxc	35486	FALSE	FALSE	28.14	-0.31	0.052	0.12	0.39	-0.48	0.005	0.017	0.44	0.61	0.29	0.22
fat	Q9VU84	FBgn0036372	Abp1	39520	FALSE	FALSE	27.1	0.2	0.11	0.22	0.25	0.19	0.13	0.22	0.94	0.97	0.41	0.033
fat	Q27268	FBgn0014189	Hel25E	33781	FALSE	FALSE	31.38	0.14	0.064	0.15	0.35	-0.27	0.0016	0.0065	0.0008	0.0078	0.047	0.75
fat	Q9VAN1	FBgn0039648	CG14515	43454	FALSE	FALSE	23.52	0.79	0.091	0.19	0.28	0.88	0.064	0.13	0.9	0.94	0.71	0.34
fat	O76464	FBgn0024945	NitFhit	38029	FALSE	FALSE	28.64	0.21	0.16	0.29	0.18	0.082	0.57	0.67	0.54	0.7	0.71	0.15
fat	Q9VZX7	FBgn0044452	Atg2	38344	FALSE	FALSE	24.12	1	0.024	0.07	0.53	0.072	0.86	0.91	0.12	0.26	0.29	0.84
fat	B7Z0U7;E1JJ78;Q9VI75	FBgn0086372	lap	40863	FALSE	FALSE	29.95	-0.13	0.18	0.31	0.17	0.063	0.51	0.62	0.16	0.31	0.42	0.15
fat	Q9VGJ7	FBgn0037935	CG6834	41409	FALSE	FALSE	28.49	-0.32	0.0046	0.02	0.76	0.09	0.37	0.49	0.0089	0.043	0.0022	0.68
fat	P42325;E1JI20	FBgn0013303	Nca	40186	FALSE	FALSE	26.83	0.25	0.12	0.23	0.24	-0.027	0.86	0.91	0.22	0.39	0.6	0.39
fat	Q9VUJ1;Q9W470	FBgn0023174	Prosbeta2	39628	FALSE	FALSE	32.43	0.16	0.21	0.35	0.14	-0.2	0.13	0.21	0.054	0.15	0.38	0.54
fat	A8DZ24;Q9V9N7;A8DZ25	FBgn0261802	CG42748	35442	FALSE	FALSE	25.13	0.83	0.072	0.16	0.33	0.86	0.064	0.13	0.96	0.98	0.79	0.31
fat	Q9VGR7	FBgn0037878	CG6693	41346	FALSE	FALSE	24.18	0.72	0.16	0.29	0.18	-0.48	0.34	0.46	0.1	0.23	0.031	0.88
fat	Q95RB2	FBgn0033728	Cpr49Ae	36351	FALSE	FALSE	35.05	0.084	0.34	0.49	0.07	-0.54	7.5e-06	0.0001	7.8e-05	0.0014	0.0031	0.98
fat	O46307	FBgn0024364	CG11417	31083	FALSE	FALSE	23.82	-1	0.019	0.059	0.57	-0.94	0.032	0.072	0.86	0.92	0.024	0.34
fat	Q8MR14;Q9VRY4	FBgn0035713	velo	38748	FALSE	FALSE	25.18	-0.21	0.16	0.29	0.19	-0.17	0.26	0.37	0.83	0.9	0.22	0.083
fat	Q9VIE8;A8DZ21;Q8T4D6	FBgn0010100	Acon	44149	FALSE	TRUE	36.02	-0.19	0.011	0.039	0.66	-0.067	0.32	0.44	0.22	0.39	0.29	0.014
fat	Q9VGL8	FBgn0037917	wkd	41390	FALSE	FALSE	23.37	-0.49	0.3	0.45	0.087	-0.014	0.98	0.98	0.47	0.64	0.7	0.58
fat	P12252-5;P12252;E2QD73;P12252-4;P12252-3;Q9W4T0;Q9W4T4;P12252-7;Q8IRU4;Q9W4S9-2;Q9W4S9;P12252-6	FBgn0000479	dnc	31309	FALSE	TRUE	27.88	-0.32	0.037	0.097	0.46	-0.3	0.045	0.095	0.95	0.97	0.89	0.058
fat	Q9VT61	FBgn0027567	CG8108	39161	FALSE	FALSE	28.63	-0.081	0.4	0.55	0.052	-0.022	0.82	0.87	0.66	0.79	0.72	0.024
fat	Q9VTY6	FBgn0264848	vih	44118	TRUE	FALSE	25.37	1.4	0.0039	0.018	0.78	-0.69	0.11	0.19	0.0024	0.017	0.37	1
fat	Q9VYH8	FBgn0030438	CG15721	32247	FALSE	FALSE	25.86	-0.53	0.052	0.13	0.4	0.46	0.093	0.17	0.014	0.058	0.79	0.95
fat	O76895	FBgn0023535	arg	46717	FALSE	FALSE	32.07	0.035	0.7	0.8	0.0083	0.33	0.0018	0.0072	0.033	0.11	0.023	0.35
fat	Q94523	FBgn0261439	SdhA	37228	FALSE	FALSE	33.53	-0.31	0.0038	0.018	0.79	-0.034	0.71	0.79	0.051	0.15	0.72	0.3
fat	Q7KSC4	FBgn0038662	Mpc1	42268	FALSE	FALSE	28.94	-0.024	0.91	0.94	0.00072	-0.65	0.0047	0.016	0.041	0.13	0.0011	0.84
fat	Q9VKY2	FBgn0027568	Cand1	34403	FALSE	FALSE	31.33	0.14	0.095	0.19	0.29	-0.12	0.13	0.22	0.03	0.1	0.31	0.25
fat	B7YZK4;B7YZK5;B7YZK6;Q7K1Q6	FBgn0259682	Jabba	37164	FALSE	FALSE	32.95	0.14	0.25	0.4	0.11	0.88	7e-07	1.7e-05	0.00031	0.0039	0.15	0.99
fat	A1Z9A8	FBgn0033816	CG4679	36466	FALSE	FALSE	28.55	-0.41	0.038	0.099	0.46	-1.5	2.3e-07	7.1e-06	0.00062	0.0064	0.46	0.99
fat	Q9VC93	FBgn0039183	Dis3	42900	FALSE	FALSE	27.62	-0.22	0.1	0.21	0.27	-0.54	0.00057	0.0029	0.096	0.22	0.013	0.45
[truncated: 12,595 more rows]
