# Supplementary material for: Tissue-specific modulation of gene expression in response to lowered insulin signalling in Drosophila
Source: eLife. 2021 Apr 21;10:e67275. doi: 10.7554/eLife.67275 (PMC8060030; doi:10.7554/eLife.67275)
Supplement: Supplementary file 3. — Columns listed as: Tissue, Quadrant (Quadrants by direction of log2(fold-change): I (protein+;transcript+), II (protein−;transcript+), III (protein−;transcript−), and IV (protein+;transcript−)), Protein flybase ID, protein symbol (Gene name), protein entrez ID, protein avg expr (Average LFQ intensity of this protein in all samples in the respective tissue), RNA avg expr (Average transcript expression of the corresponding transcript in the respective tissue), protein p-value (dilp2-3,5 v. wDah), RNA p-value (dilp2-3,5 v. wDah), Protein adj p-value (dilp2-3,5 v. wDah FDR), Protein logFC (dilp2-3,5 v. wDah), RNA LogFC (dilp2-3,5 v. wDah), opposite (Are protein and transcript changed in opposite direction?), Wolbachia dependence (Does the protein change in dilp2-3,5 vs wDah depend on Wolbachia status?), wolbachia independence (Is the protein change in dilp2-3,5 vs wDah independent of Wolbachia status?), RNA Wolbachia dependence (Does the transcript change in dilp2-3,5 vs wDah depend on Wolbachia status?), interaction p-value (Protein p-value, interaction term (dilp2-3,5 vs. wDah ~ Wol+ vs. Wol-)), interaction adj p-value (Protein FDR, interaction term (dilp2-3,5 vs. wDah ~ Wol+ vs. Wol-)), dilpT p-value (Protein p-value, dilp2-3,5/Wol- vs. wDah/Wol-), dilpT adj p-value (Protein FDR, dilp2-3,5/Wol- vs. wDah/Wol-), protein LogFC (Protein log2(fold-change), dilp2-3,5/Wol- vs. wDah/Wol-), TOST p-value (Protein p-value, two-one-sided-t-test of equivalence, interaction term (dilp2-3,5 vs. wDah ~ Wol+ vs. Wol-)), TOST adj p-value (Protein p-value, two-one-sided-t-test of equivalence, interaction term (dilp2-3,5 vs. wDah ~ Wol+ vs. Wol-)). Wol+/- denotes the presence (+) or absence (-) of Wolbachia in formulae. Genotypes denoted as wDah and dilp (2-3,5) with Wolbachia and wDahT and dilpT (2-3,5) without Wolbachia. [file elife-67275-supp3.xlsx]

## Sheet: Sheet1
tissue	Quadrant	PROT.flybase	PROT.symbol	PROT.entrez	PROT.AveExpr	RNA.AveExpr	PROT.P.Value	RNA.P.Value	PROT.adj.P.Val	RNA.adj.P.Val	PROT.logFC	RNA.logFC	opposite	wolDependent	wolIndependent	rna.wolDependent	interaction.P.Value	interaction.adj.P.Val	dilpT.P.Value	dilpT.adj.P.Val	protein.logFC	TOST.P.Value	TOST.adj.P.Val	rna.interaction.P.Value	rna.interaction.adj.P.Val
fat	I	FBgn0036121	CG6310	39237	26.88	132.47	7.6e-10	3.5e-13	1.4e-07	1e-10	1.5	1.9	FALSE	FALSE	FALSE	FALSE	0.0025	0.018	2.1e-06	3.8e-05	0.87	0.94	1	0.52	0.75
fat	I	FBgn0003996	w	31271	24.66	2966.04	4e-05	6.5e-32	0.00047	3.1e-28	3	4.5	FALSE	FALSE	FALSE	FALSE	0.64	0.78	0.00016	0.0011	2.6	0.51	1	0.077	0.35
fat	I	FBgn0038074	Gnmt	41561	28.42	2171.62	5.6e-09	4e-09	6.6e-07	4.9e-07	3.3	1.8	FALSE	FALSE	FALSE	FALSE	1e-06	7e-05	8e-14	8.6e-11	6.6	1	1	0.026	0.26
fat	I	FBgn0040211	hgo	34552	30.79	2796.19	5.2e-10	1.6e-06	1.1e-07	9.2e-05	1.3	1.4	FALSE	FALSE	FALSE	FALSE	0.18	0.34	4.6e-11	8.4e-09	1.6	0.22	0.76	0.05	0.3
fat	I	FBgn0001248	Idh	44291	36.34	31543.3	2.2e-10	3.4e-06	6e-08	0.00018	0.58	1.1	FALSE	FALSE	TRUE	FALSE	0.21	0.38	2.5e-11	6.1e-09	0.66	0.00041	0.11	0.041	0.29
fat	I	FBgn0037697	GstZ2	41133	26.95	924.45	1.5e-07	4.2e-08	6.1e-06	3.9e-06	0.99	1.4	FALSE	FALSE	FALSE	TRUE	0.00023	0.0032	0.076	0.14	0.22	0.99	1	0.0013	0.061
fat	I	FBgn0031184	CG14615	33129	29.98	1379.9	1.9e-05	9.9e-11	0.00027	1.7e-08	0.67	1.4	FALSE	FALSE	FALSE	FALSE	0.045	0.13	0.014	0.037	0.32	0.53	1	0.014	0.2
fat	I	FBgn0033203	CG2070	35706	30.66	3308.5	2.5e-06	4.6e-09	5.3e-05	5.5e-07	0.59	1.4	FALSE	FALSE	FALSE	FALSE	0.0069	0.036	2.1e-09	1.9e-07	0.97	0.62	1	0.017	0.22
fat	I	FBgn0014427	CG11899	46391	34.71	5989.33	5.2e-12	0.00028	7.5e-09	0.007	0.95	1	FALSE	FALSE	FALSE	FALSE	7e-06	0.00025	3.2e-15	1.4e-11	1.5	0.98	1	0.087	0.37
fat	I	FBgn0036992	CG11796	40263	32.89	7033.24	2.3e-09	9.1e-06	3.5e-07	0.00041	0.76	1.2	FALSE	FALSE	FALSE	FALSE	1.3e-07	2.1e-05	1.4e-14	3e-11	1.6	1	1	0.069	0.34
fat	I	FBgn0085484	Pdxk	39066	32.93	2035.95	1.7e-08	2.7e-06	1.3e-06	0.00015	0.74	0.91	FALSE	FALSE	FALSE	FALSE	0.0023	0.017	2.4e-11	6.1e-09	1.1	0.66	1	0.092	0.37
fat	I	FBgn0037057	CG10512	40339	32.41	1361.12	3.4e-09	1.5e-05	4.7e-07	0.00064	0.79	0.83	FALSE	FALSE	FALSE	TRUE	0.018	0.071	3.2e-11	6.9e-09	1.1	0.24	0.79	0.0007	0.04
fat	I	FBgn0033879	CG6543	36536	34.6	2683.89	1.5e-08	2.2e-05	1.2e-06	0.0009	0.61	0.9	FALSE	FALSE	TRUE	FALSE	0.13	0.27	6.2e-10	7.5e-08	0.75	0.017	0.27	0.12	0.41
fat	I	FBgn0016675	Lectin-galC1	35216	27.72	5607.85	7.6e-05	8.1e-09	0.00078	9e-07	0.71	1.5	FALSE	FALSE	FALSE	TRUE	0.0039	0.024	1.5e-08	7.9e-07	1.4	0.93	1	9e-06	0.0012
fat	I	FBgn0001098	Gdh	42832	33.85	2318.28	1.2e-07	1e-05	5.2e-06	0.00047	0.68	0.64	FALSE	FALSE	TRUE	FALSE	0.64	0.77	3.8e-07	1e-05	0.63	0.011	0.22	0.068	0.33
fat	I	FBgn0037817	Cyp12e1	41272	29.56	545.31	3.8e-09	0.00016	5e-07	0.0047	0.76	0.95	FALSE	FALSE	TRUE	FALSE	0.98	0.99	3.6e-09	2.8e-07	0.76	0.0017	0.13	0.0067	0.15
fat	I	FBgn0035298	SCOT	38261	33.11	2614.49	3e-08	6.8e-05	2e-06	0.0023	0.89	0.96	FALSE	FALSE	TRUE	FALSE	0.67	0.8	7.9e-08	3e-06	0.83	0.025	0.31	0.12	0.41
fat	I	FBgn0036824	CG3902	40059	34.88	5488.52	6.4e-07	8.6e-06	1.8e-05	0.00039	0.54	1	FALSE	FALSE	TRUE	FALSE	0.13	0.28	1.5e-08	8.2e-07	0.7	0.046	0.4	0.07	0.34
fat	I	FBgn0027348	bgm	44117	32.69	4577.82	1.5e-07	5.6e-05	6.1e-06	0.002	0.75	0.97	FALSE	FALSE	TRUE	FALSE	0.58	0.73	5.9e-07	1.5e-05	0.68	0.025	0.31	0.1	0.39
fat	I	FBgn0036290	CG10638	39424	31.56	678.56	8.8e-11	0.0088	2.7e-08	0.09	1.1	0.69	FALSE	FALSE	TRUE	FALSE	0.27	0.45	1.4e-11	4.4e-09	1.3	0.047	0.4	0.58	0.79
fat	I	FBgn0030968	CG7322	32880	33.61	1357.02	1.1e-07	0.00022	5.1e-06	0.0058	0.52	1.1	FALSE	FALSE	TRUE	FALSE	0.84	0.9	1.8e-07	5.8e-06	0.51	0.00078	0.13	0.017	0.22
fat	I	FBgn0063491	GstE9	246581	33.5	8569.28	4e-06	1.6e-05	7.4e-05	0.00071	0.61	1.2	FALSE	FALSE	FALSE	TRUE	0.045	0.13	0.0025	0.0095	0.33	0.34	0.9	0.0025	0.088
fat	I	FBgn0027657	glob1	41930	34.98	6930.91	5.4e-09	0.0023	6.5e-07	0.035	0.82	0.71	FALSE	FALSE	FALSE	FALSE	0.0017	0.013	8.5e-12	3.3e-09	1.2	0.73	1	0.0084	0.17
fat	I	FBgn0030575	CG5321	32399	31.25	2569.23	7.6e-08	0.0016	4.1e-06	0.027	0.68	0.98	FALSE	FALSE	TRUE	FALSE	0.75	0.85	1.6e-07	5.4e-06	0.65	0.0064	0.18	0.039	0.28
fat	I	FBgn0036337	AdenoK	39479	32.75	3708.72	5.9e-05	8e-06	0.00062	0.00037	0.81	1	FALSE	FALSE	FALSE	FALSE	0.53	0.69	0.00041	0.0022	0.67	0.18	0.71	0.0034	0.1
fat	I	FBgn0263199	Galk	39031	33.52	9323.26	8.4e-09	0.0061	8.2e-07	0.07	0.81	0.74	FALSE	FALSE	TRUE	FALSE	0.16	0.32	4.8e-10	6.1e-08	0.97	0.067	0.47	0.05	0.3
fat	I	FBgn0021765	scu	32789	35.65	6005.08	1e-07	0.0017	4.9e-06	0.028	0.56	0.78	FALSE	FALSE	TRUE	FALSE	0.38	0.56	1.4e-08	7.6e-07	0.64	0.0061	0.18	0.12	0.4
fat	I	FBgn0016013	Faa	45577	30.75	999.25	1.6e-06	0.00044	3.8e-05	0.01	0.63	0.98	FALSE	FALSE	FALSE	FALSE	6e-05	0.0012	3.4e-11	6.9e-09	1.3	0.99	1	0.08	0.35
fat	I	FBgn0000064	Ald	43183	36.9	11525.8	5.4e-05	2.3e-05	0.00058	0.00095	0.31	0.69	FALSE	FALSE	FALSE	TRUE	0.00018	0.0027	7e-10	7.8e-08	0.7	0.72	1	0.00068	0.039
fat	I	FBgn0027945	ppl	40349	32	3192.98	4.4e-08	0.0051	2.7e-06	0.063	0.96	0.77	FALSE	FALSE	FALSE	FALSE	0.17	0.32	1.5e-06	3.1e-05	0.74	0.21	0.74	0.021	0.24
fat	I	FBgn0022359	Sodh-2	41313	28.63	843.4	1.3e-06	0.00079	3.3e-05	0.016	0.94	0.96	FALSE	FALSE	FALSE	TRUE	0.0011	0.0099	0.11	0.2	0.22	0.97	1	0.0032	0.098
fat	I	FBgn0038516	P5cr-2	42106	31.47	1559.33	7e-08	0.0071	3.9e-06	0.078	0.94	0.81	FALSE	FALSE	FALSE	FALSE	0.024	0.086	4.8e-05	0.0004	0.57	0.58	1	0.017	0.23
fat	I	FBgn0020385	pug	41279	34.99	15464.3	3.2e-07	0.0038	1.1e-05	0.051	0.44	0.84	FALSE	FALSE	FALSE	FALSE	0.001	0.0092	1e-10	1.7e-08	0.75	0.34	0.9	0.014	0.2
fat	I	FBgn0038771	CG4390	42396	30.59	1294.89	2.1e-05	0.00023	0.00029	0.0061	0.65	0.92	FALSE	FALSE	FALSE	FALSE	0.058	0.16	0.01	0.03	0.32	0.46	0.98	0.1	0.39
fat	I	FBgn0037687	CG8132	41121	30.85	869.22	3.5e-06	0.0015	6.8e-05	0.026	0.43	0.75	FALSE	FALSE	FALSE	FALSE	0.0027	0.019	1.2e-09	1.2e-07	0.76	0.42	0.96	0.033	0.27
fat	I	FBgn0038876	CG5919	42526	28.14	582.69	0.0065	3.1e-07	0.026	2.3e-05	0.64	1.3	FALSE	FALSE	FALSE	FALSE	0.1	0.23	0.52	0.63	0.14	0.71	1	0.11	0.39
fat	I	FBgn0014455	Ahcy	32471	33.42	5909.97	0.00089	7.3e-06	0.0055	0.00034	0.48	0.7	FALSE	FALSE	FALSE	FALSE	0.052	0.15	2e-06	3.8e-05	0.84	0.53	1	0.18	0.48
fat	I	FBgn0036053	iPLA2-VIA	39160	29.37	3053.21	6.5e-07	0.0046	1.8e-05	0.058	0.63	0.54	FALSE	FALSE	FALSE	FALSE	0.0057	0.031	6.7e-10	7.8e-08	1	0.61	1	0.89	0.95
fat	I	FBgn0016715	Reg-2	38075	32.22	1048.39	2.3e-05	0.00042	0.00031	0.0097	0.53	0.99	FALSE	FALSE	FALSE	FALSE	0.019	0.073	3e-08	1.4e-06	0.88	0.51	1	0.013	0.2
fat	I	FBgn0032002	CG8353	34123	29.52	659.09	1.1e-06	0.0039	2.8e-05	0.052	1.1	0.75	FALSE	FALSE	FALSE	FALSE	0.34	0.52	1.6e-05	0.00017	0.86	0.26	0.82	0.015	0.21
fat	I	FBgn0010387	Dbi	38784	35.05	5950.18	0.003	1.7e-06	0.015	0.0001	0.35	1.2	FALSE	FALSE	TRUE	FALSE	0.72	0.84	0.0091	0.027	0.3	0.03	0.33	0.014	0.2
fat	I	FBgn0085453	CG34424	37699	31.76	2281.39	5e-05	0.00024	0.00055	0.0063	0.36	1.1	FALSE	FALSE	FALSE	FALSE	5.7e-07	5.1e-05	5.8e-12	2.8e-09	1.1	1	1	0.0045	0.12
fat	I	FBgn0262782	Mdh1	34414	35.13	13610.1	2.8e-06	0.0028	5.6e-05	0.04	0.56	0.77	FALSE	FALSE	TRUE	FALSE	0.14	0.29	5.8e-08	2.3e-06	0.74	0.095	0.55	0.04	0.28
fat	I	FBgn0036271	Pbgs	39402	29.53	1216.71	0.00062	4.9e-05	0.0042	0.0018	0.34	1	FALSE	FALSE	FALSE	FALSE	0.00021	0.003	0.027	0.062	-0.2	0.95	1	0.049	0.3
fat	I	FBgn0011227	ox	45401	31.75	890.28	1.7e-05	0.0015	0.00024	0.026	0.91	0.68	FALSE	FALSE	FALSE	FALSE	0.041	0.13	0.014	0.038	0.43	0.74	1	0.027	0.26
fat	I	FBgn0032820	fbp	35265	35.41	12078.5	1.6e-06	0.007	3.8e-05	0.077	0.52	0.78	FALSE	FALSE	FALSE	FALSE	0.033	0.11	6.9e-09	4.5e-07	0.76	0.17	0.69	0.021	0.24
fat	I	FBgn0004888	Scsalpha	38447	34.65	8808.61	0.00034	0.00011	0.0026	0.0033	0.4	0.84	FALSE	FALSE	TRUE	TRUE	0.66	0.78	8.5e-05	0.00063	0.46	0.021	0.28	0.0022	0.084
fat	I	FBgn0027654	jdp	43630	28.44	232.83	3.7e-06	0.0044	7.1e-05	0.056	1	0.66	FALSE	FALSE	TRUE	FALSE	0.91	0.95	5.1e-06	7.2e-05	1	0.088	0.52	0.0038	0.11
fat	I	FBgn0037749	CG9471	41197	30.95	583.77	2.3e-05	0.0014	0.00031	0.024	0.43	0.56	FALSE	FALSE	TRUE	FALSE	0.46	0.63	0.00022	0.0013	0.35	0.013	0.24	0.038	0.28
fat	I	FBgn0000261	Cat	40048	36.35	26410.6	0.00014	0.00031	0.0013	0.0076	0.23	0.86	FALSE	FALSE	TRUE	FALSE	0.13	0.27	1.5e-06	3e-05	0.34	0.0015	0.13	0.1	0.39
fat	I	FBgn0035348	CG16758	38315	32.17	7963.03	2.4e-06	0.007	5.1e-05	0.077	0.55	0.57	FALSE	FALSE	FALSE	TRUE	2.6e-09	1.5e-06	2.2e-14	3.2e-11	1.8	1	1	0.0028	0.093
fat	I	FBgn0025814	Mgstl	44110	31.35	3541.91	4.6e-05	0.001	0.00052	0.02	0.67	0.85	FALSE	FALSE	FALSE	FALSE	0.24	0.41	0.002	0.0077	0.45	0.24	0.79	0.036	0.28
fat	I	FBgn0026428	HDAC6	32461	31.29	13663.2	4.3e-06	0.0066	7.9e-05	0.074	0.56	0.79	FALSE	FALSE	FALSE	FALSE	0.02	0.076	8.9e-09	5.5e-07	0.87	0.4	0.94	0.062	0.33
fat	I	FBgn0032350	CG6287	34554	35.26	8342.98	2.3e-05	0.0022	0.00031	0.034	0.45	0.76	FALSE	FALSE	TRUE	FALSE	0.21	0.38	6.5e-07	1.6e-05	0.6	0.053	0.42	0.058	0.32
fat	I	FBgn0034335	GstE1	37106	32.01	1160.38	0.00017	0.00076	0.0015	0.015	0.39	0.89	FALSE	FALSE	TRUE	FALSE	0.73	0.84	5.8e-05	0.00046	0.43	0.0097	0.21	0.031	0.27
fat	I	FBgn0023212	EloB	42435	30.85	1314.65	0.01	4.9e-06	0.037	0.00025	0.24	0.99	FALSE	FALSE	FALSE	TRUE	5.4e-07	5e-05	8.2e-11	1.4e-08	1.2	1	1	0.00019	0.015
fat	I	FBgn0036262	CG6910	39391	28.64	11613.7	0.011	5.7e-06	0.038	0.00028	0.47	1.2	FALSE	FALSE	FALSE	TRUE	0.19	0.35	0.00015	0.001	0.79	0.47	0.98	0.0012	0.059
fat	I	FBgn0031971	Sirup	34089	27.49	885.37	0.00033	0.00073	0.0025	0.015	0.64	0.73	FALSE	FALSE	FALSE	FALSE	0.24	0.42	9.1e-06	0.00011	0.89	0.33	0.89	0.0056	0.13
fat	I	FBgn0025454	Cyp6g1	36316	32.66	25070.5	0.0023	0.00011	0.012	0.0035	0.27	1	FALSE	FALSE	FALSE	FALSE	5.3e-05	0.0011	2.4e-09	2.1e-07	0.84	0.98	1	0.21	0.51
fat	I	FBgn0051713	Apf	318908	28.32	123.92	4.6e-05	0.0048	0.00052	0.06	0.58	0.57	FALSE	FALSE	FALSE	FALSE	0.1	0.23	0.009	0.027	0.32	0.3	0.87	0.095	0.38
fat	I	FBgn0034382	CG18609	37158	24.1	5434.31	0.00033	0.0017	0.0026	0.028	1.9	0.79	FALSE	FALSE	FALSE	TRUE	0.76	0.86	0.00013	0.00088	2.1	0.4	0.94	0.00019	0.015
fat	I	FBgn0034356	CG10924	37130	25.78	525.84	0.00029	0.0026	0.0023	0.038	1.5	0.89	FALSE	FALSE	FALSE	FALSE	0.19	0.36	5.4e-06	7.5e-05	2.1	0.73	1	0.026	0.26
fat	I	FBgn0033446	CG1648	36009	35.39	49894.8	0.00094	0.00093	0.0057	0.018	0.65	1	FALSE	FALSE	FALSE	FALSE	0.31	0.49	3.8e-05	0.00034	0.89	0.34	0.9	0.069	0.33
fat	I	FBgn0029828	CG6067	31529	30.72	5595.59	0.00064	0.0015	0.0043	0.026	0.65	0.96	FALSE	FALSE	FALSE	FALSE	0.53	0.69	0.0047	0.016	0.51	0.19	0.72	0.041	0.29
fat	I	FBgn0035044	CG3663	37944	30.87	546.76	0.0012	0.00082	0.0069	0.016	0.39	0.7	FALSE	FALSE	FALSE	FALSE	0.05	0.14	2.4e-06	4.2e-05	0.69	0.39	0.94	0.029	0.26
fat	I	FBgn0023023	CRMP	40675	31.28	620.76	8.2e-05	0.0083	0.00082	0.086	0.33	0.6	FALSE	FALSE	FALSE	FALSE	0.014	0.058	5.7e-08	2.3e-06	0.58	0.16	0.68	0.024	0.25
fat	I	FBgn0086691	UK114	34897	34.22	3177.85	0.0057	0.00014	0.024	0.0042	0.39	0.98	FALSE	FALSE	FALSE	FALSE	0.29	0.47	0.12	0.21	0.2	0.2	0.73	0.0043	0.11
fat	I	FBgn0030839	CG5613	32726	25.85	228.17	0.0052	0.00017	0.022	0.0047	0.6	0.8	FALSE	FALSE	FALSE	FALSE	0.94	0.97	0.0065	0.02	0.58	0.12	0.61	0.61	0.8
fat	I	FBgn0039896	yellow-h	43779	25.39	58.28	0.003	0.0004	0.014	0.0093	0.78	1	FALSE	FALSE	FALSE	FALSE	0.61	0.75	0.00059	0.003	0.95	0.3	0.86	0.061	0.33
fat	I	FBgn0027552	CG10863	38463	34.09	4286.24	0.0031	0.00051	0.015	0.011	0.18	0.82	FALSE	FALSE	FALSE	FALSE	6.7e-05	0.0013	3.6e-09	2.8e-07	0.57	0.72	1	0.0042	0.11
fat	I	FBgn0260747	Chchd2	32701	29.45	915.04	0.0023	0.00078	0.012	0.016	0.61	0.56	FALSE	FALSE	FALSE	TRUE	0.48	0.65	0.021	0.052	0.43	0.25	0.81	0.0026	0.09
fat	I	FBgn0001125	Got2	33373	34.98	4541.47	0.0007	0.0027	0.0045	0.04	0.38	0.62	FALSE	FALSE	FALSE	FALSE	0.03	0.1	0.45	0.57	0.071	0.41	0.95	0.29	0.58
fat	I	FBgn0013954	FK506-bp2	37214	33.86	2860.19	0.00019	0.008	0.0016	0.084	0.33	0.39	FALSE	FALSE	TRUE	FALSE	0.97	0.98	0.00017	0.0011	0.33	0.0015	0.13	0.25	0.54
fat	I	FBgn0053054	CG33054	40340	30.34	301.97	0.003	0.00075	0.014	0.015	0.41	0.77	FALSE	FALSE	FALSE	TRUE	0.00079	0.0077	4.1e-08	1.8e-06	1.1	0.97	1	0.002	0.08
fat	I	FBgn0032264	Lip4	34450	25.04	2149.78	0.013	0.00017	0.044	0.0047	0.66	1.1	FALSE	FALSE	FALSE	FALSE	0.39	0.57	0.15	0.24	0.36	0.45	0.97	0.032	0.27
fat	I	FBgn0027611	LManII	34437	33.49	11040.1	0.002	0.0019	0.011	0.031	0.28	0.63	FALSE	FALSE	FALSE	FALSE	0.033	0.11	2.2e-06	3.9e-05	0.53	0.21	0.74	0.017	0.22
fat	I	FBgn0004363	porin	34500	35.76	8161.88	0.0019	0.0023	0.0099	0.035	0.26	0.4	FALSE	FALSE	TRUE	FALSE	0.057	0.16	0.45	0.56	0.054	0.087	0.52	0.022	0.25
fat	I	FBgn0001124	Got1	36782	33.2	3833.52	0.16	1.1e-06	0.29	6.6e-05	0.12	0.73	FALSE	FALSE	FALSE	TRUE	0.047	0.14	0.0003	0.0017	0.37	0.23	0.78	0.00013	0.011
fat	I	FBgn0030558	CG1461	32381	23.32	4467.08	0.012	0.00037	0.043	0.0087	1	0.92	FALSE	FALSE	FALSE	FALSE	0.23	0.41	0.00027	0.0016	1.7	0.72	1	0.027	0.26
fat	I	FBgn0035989	CG3967	39086	27.05	288.96	0.039	6.2e-05	0.1	0.0022	0.26	0.6	FALSE	FALSE	FALSE	FALSE	0.055	0.15	7.4e-05	0.00057	0.59	0.48	0.99	0.072	0.34
fat	I	FBgn0039737	CG7920	43562	36.31	14160.1	0.0028	0.0029	0.014	0.042	0.28	0.69	FALSE	FALSE	FALSE	TRUE	0.066	0.17	0.49	0.61	0.056	0.16	0.67	0.0031	0.097
fat	I	FBgn0031717	Oscillin	33783	30.77	615.17	0.0026	0.0033	0.013	0.045	0.3	0.7	FALSE	FALSE	TRUE	FALSE	0.21	0.38	4.9e-05	0.00041	0.45	0.07	0.48	0.016	0.22
fat	I	FBgn0039481	Cpr97Eb	43259	31.94	80.43	0.036	0.00012	0.094	0.0036	0.28	1.2	FALSE	FALSE	TRUE	FALSE	0.93	0.96	0.028	0.065	0.29	0.037	0.36	0.19	0.48
fat	I	FBgn0035714	CG8549	38749	29.41	564.37	0.0032	0.0034	0.015	0.046	0.32	0.51	FALSE	FALSE	TRUE	FALSE	0.39	0.56	0.0002	0.0013	0.43	0.053	0.42	0.3	0.58
fat	I	FBgn0030724	Nipsnap	32573	32.25	1231.49	0.022	0.00033	0.065	0.008	0.24	0.55	FALSE	FALSE	TRUE	TRUE	0.76	0.86	0.052	0.11	0.2	0.02	0.28	0.00069	0.04
fat	I	FBgn0035473	mge	38459	28.93	642.12	0.007	0.0016	0.028	0.027	0.37	0.53	FALSE	FALSE	FALSE	FALSE	0.086	0.21	0.64	0.73	0.058	0.44	0.97	0.058	0.32
fat	I	FBgn0035060	Eps-15	37961	28.3	1958.9	0.031	0.00022	0.084	0.0058	0.21	0.76	FALSE	FALSE	FALSE	FALSE	0.16	0.31	0.78	0.85	0.025	0.12	0.6	0.04	0.28
fat	I	FBgn0016687	Nurf-38	37922	34.87	7701.98	0.0055	0.0029	0.023	0.041	0.2	0.62	FALSE	FALSE	FALSE	FALSE	0.00096	0.0088	7.9e-08	3e-06	0.55	0.56	1	0.028	0.26
fat	I	FBgn0050410	Rpi	246599	30.46	1624.56	0.0043	0.0044	0.019	0.056	0.38	0.59	FALSE	FALSE	FALSE	FALSE	0.38	0.56	0.059	0.12	0.23	0.12	0.61	0.41	0.67
fat	I	FBgn0040985	CG6115	50459	27.28	627.5	0.011	0.0016	0.039	0.028	0.25	0.84	FALSE	FALSE	TRUE	TRUE	0.34	0.52	0.00055	0.0028	0.37	0.048	0.41	0.003	0.095
fat	I	FBgn0051523	CG31523	326148	30.81	23291.2	0.0065	0.0034	0.026	0.047	0.39	0.72	FALSE	FALSE	FALSE	FALSE	0.0087	0.042	1.1e-06	2.3e-05	0.92	0.85	1	0.012	0.19
fat	I	FBgn0036316	CG10960	39458	31.49	14689.9	0.0053	0.005	0.022	0.062	0.37	0.54	FALSE	FALSE	FALSE	FALSE	0.44	0.61	0.00045	0.0024	0.5	0.11	0.57	0.0072	0.15
fat	I	FBgn0039656	CG11951	43463	25.26	208.94	0.35	1.1e-06	0.5	6.9e-05	0.69	1	FALSE	FALSE	FALSE	FALSE	0.94	0.96	0.41	0.52	0.61	0.4	0.94	0.0086	0.17
fat	I	FBgn0038819	Cpr92F	42450	33.73	26.37	0.0034	0.0083	0.016	0.086	0.71	0.95	FALSE	FALSE	FALSE	FALSE	0.81	0.89	0.0016	0.0067	0.78	0.19	0.72	0.21	0.5
fat	I	FBgn0010516	wal	36252	35.58	8195.88	0.004	0.0076	0.018	0.081	0.2	0.65	FALSE	FALSE	FALSE	FALSE	0.012	0.053	1.1e-06	2.3e-05	0.45	0.14	0.65	0.034	0.27
fat	I	FBgn0030653	CG7860	32488	26.78	396.9	0.024	0.00097	0.071	0.019	0.64	1	FALSE	FALSE	FALSE	FALSE	0.0066	0.035	2.5e-06	4.3e-05	1.8	0.98	1	0.029	0.26
fat	I	FBgn0265784	CrebB	32817	24.68	1207.31	0.0056	0.0075	0.023	0.081	1.6	0.41	FALSE	FALSE	FALSE	FALSE	0.078	0.19	0.62	0.71	0.25	0.91	1	0.004	0.11
fat	I	FBgn0261436	DhpD	40528	32.12	866.74	0.023	0.002	0.068	0.031	0.24	0.79	FALSE	FALSE	FALSE	FALSE	0.0074	0.038	2.7e-06	4.5e-05	0.65	0.7	1	0.061	0.33
fat	I	FBgn0086904	Nacalpha	36409	32.5	12013.4	0.0062	0.0087	0.025	0.089	0.34	0.54	FALSE	FALSE	FALSE	FALSE	0.35	0.52	0.1	0.18	0.19	0.11	0.59	0.11	0.4
fat	I	FBgn0017429	CG5989	38984	25.64	387.88	0.12	0.00015	0.24	0.0045	0.36	0.73	FALSE	FALSE	FALSE	FALSE	0.075	0.19	0.31	0.42	-0.23	0.79	1	0.63	0.82
fat	I	FBgn0051673	CG31673	35348	31.75	736.02	0.18	7.6e-05	0.32	0.0025	0.15	0.62	FALSE	FALSE	FALSE	FALSE	0.068	0.17	0.19	0.29	-0.15	0.41	0.95	0.014	0.2
fat	I	FBgn0043841	vir-1	34652	28.82	9464.6	0.063	0.00085	0.15	0.017	0.33	0.75	FALSE	FALSE	FALSE	FALSE	0.08	0.2	0.53	0.64	-0.11	0.66	1	0.026	0.26
fat	I	FBgn0036359	CG14105	39507	24.4	242.49	0.21	6.6e-05	0.35	0.0023	0.47	1.2	FALSE	FALSE	FALSE	FALSE	0.036	0.12	0.00028	0.0016	1.6	0.94	1	0.03	0.26
fat	I	FBgn0035909	ergic53	44679	30.69	1370.32	0.18	0.0001	0.31	0.0033	0.12	0.58	FALSE	FALSE	FALSE	FALSE	0.41	0.58	0.019	0.047	0.22	0.031	0.33	0.014	0.2
fat	I	FBgn0034902	CG5532	37761	27.13	722.82	0.018	0.006	0.057	0.07	1	0.66	FALSE	FALSE	FALSE	FALSE	0.056	0.15	0.78	0.84	-0.12	0.92	1	0.051	0.31
fat	I	FBgn0000109	Aprt	48224	30.65	325.06	0.039	0.0024	0.1	0.036	0.27	0.49	FALSE	FALSE	FALSE	FALSE	0.045	0.13	5.5e-05	0.00045	0.63	0.55	1	0.07	0.34
fat	I	FBgn0034723	CG13506	37556	28.94	791.12	0.042	0.0025	0.11	0.037	0.27	0.56	FALSE	FALSE	FALSE	FALSE	0.26	0.43	0.6	0.7	0.065	0.22	0.76	0.01	0.18
fat	I	FBgn0035679	CG10467	38697	30.43	624.92	0.11	0.00049	0.22	0.011	0.14	0.75	FALSE	FALSE	FALSE	FALSE	0.008	0.04	1.5e-05	0.00017	0.49	0.52	1	0.086	0.36
fat	I	FBgn0035379	spz5	38350	23.63	22.84	0.015	0.01	0.05	0.099	0.92	0.83	FALSE	FALSE	FALSE	FALSE	0.14	0.29	0.62	0.71	0.17	0.79	1	0.083	0.36
fat	I	FBgn0034511	GNBP-like3	37313	28.71	1184.95	0.13	0.00042	0.25	0.0097	0.25	0.99	FALSE	FALSE	FALSE	TRUE	0.77	0.87	0.26	0.38	0.18	0.12	0.59	0.0023	0.085
fat	I	FBgn0266599	Hsc70-4	41840	36.02	79572.5	0.023	0.007	0.069	0.077	0.13	0.46	FALSE	FALSE	TRUE	FALSE	0.066	0.17	5.8e-05	0.00046	0.27	0.0077	0.19	0.06	0.33
fat	I	FBgn0036806	Cyp12c1	40037	30.2	1003.79	0.072	0.0014	0.16	0.025	0.26	0.72	FALSE	FALSE	FALSE	FALSE	0.33	0.51	0.0038	0.013	0.45	0.22	0.77	0.011	0.18
fat	I	FBgn0259722	CG42376	7354420	26.98	203.7	0.066	0.0017	0.15	0.028	0.31	0.62	FALSE	FALSE	FALSE	FALSE	0.096	0.22	0.6	0.7	-0.083	0.59	1	0.031	0.27
fat	I	FBgn0032253	LManI	34436	26.6	255.52	0.061	0.0019	0.14	0.031	0.41	0.75	FALSE	FALSE	FALSE	FALSE	0.33	0.51	0.003	0.011	0.71	0.44	0.97	0.015	0.22
fat	I	FBgn0030593	CG9512	32419	33.37	9377.81	0.031	0.0065	0.086	0.074	0.31	0.75	FALSE	FALSE	FALSE	FALSE	0.37	0.54	0.0019	0.0075	0.48	0.19	0.72	0.61	0.8
fat	I	FBgn0030160	CG9691	31923	27.41	7318.45	0.025	0.0089	0.072	0.091	0.5	0.79	FALSE	FALSE	FALSE	FALSE	0.53	0.69	0.0036	0.013	0.68	0.29	0.85	0.013	0.2
fat	I	FBgn0038129	TBC1D5	41628	26.18	2031.69	0.027	0.0081	0.077	0.085	0.33	0.74	FALSE	FALSE	FALSE	FALSE	0.041	0.13	3.3e-05	0.0003	0.75	0.67	1	0.18	0.48
fat	I	FBgn0036318	Wbp2	39460	25.11	1509.23	0.1	0.0012	0.2	0.022	1.4	0.77	FALSE	FALSE	FALSE	FALSE	0.069	0.18	0.33	0.45	-0.83	0.94	1	0.01	0.18
fat	I	FBgn0003134	Pp1alpha-96A	42922	31.23	4531.59	0.071	0.0024	0.16	0.036	0.29	0.64	FALSE	FALSE	FALSE	TRUE	0.34	0.52	0.6	0.7	0.081	0.27	0.83	0.0022	0.084
fat	I	FBgn0052446	Atox1	326216	29.16	691.84	0.047	0.0044	0.12	0.056	0.28	0.4	FALSE	FALSE	FALSE	FALSE	0.038	0.12	5.3e-05	0.00044	0.7	0.66	1	0.026	0.26
fat	I	FBgn0062442	Cisd2	43459	32.08	1288.94	0.028	0.0092	0.078	0.092	0.23	0.58	FALSE	FALSE	TRUE	FALSE	0.71	0.83	0.009	0.027	0.28	0.025	0.31	0.037	0.28
fat	I	FBgn0033431	CG1827	35989	25.11	1028.47	0.037	0.0071	0.097	0.078	0.28	0.72	FALSE	FALSE	FALSE	FALSE	7.4e-05	0.0014	2.3e-08	1.1e-06	1.2	1	1	0.16	0.45
fat	I	FBgn0031428	CG9886	33431	30.79	1147.88	0.044	0.0058	0.11	0.069	0.24	0.73	FALSE	FALSE	FALSE	FALSE	0.039	0.12	4.9e-05	0.00041	0.58	0.51	1	0.036	0.27
fat	I	FBgn0032422	atilla	34647	28.41	859.29	0.33	7.2e-05	0.49	0.0024	0.25	0.89	FALSE	FALSE	FALSE	FALSE	0.24	0.41	0.014	0.039	0.69	0.61	1	0.0095	0.17
fat	I	FBgn0033570	ND-B14	36159	30.83	665.74	0.086	0.0026	0.18	0.038	0.17	0.69	FALSE	FALSE	FALSE	FALSE	0.00029	0.0037	2.1e-07	6.4e-06	0.76	0.96	1	0.011	0.19
fat	I	FBgn0004103	Pp1-87B	49260	27.24	1551.87	0.085	0.0028	0.18	0.04	0.52	0.37	FALSE	FALSE	FALSE	FALSE	0.23	0.4	0.95	0.96	0.019	0.65	1	0.0094	0.17
fat	I	FBgn0036848	CG10424	40085	30.22	978.8	0.098	0.0024	0.2	0.036	0.21	0.61	FALSE	FALSE	FALSE	FALSE	0.33	0.51	0.75	0.82	0.038	0.16	0.68	0.083	0.36
fat	I	FBgn0028970	betaggt-II	47757	25.44	239.22	0.045	0.0095	0.11	0.095	0.36	0.47	FALSE	FALSE	FALSE	FALSE	0.49	0.65	0.26	0.37	0.19	0.23	0.78	0.14	0.43
fat	I	FBgn0005585	Calr	41166	33.05	6162.05	0.36	0.00016	0.51	0.0046	0.069	0.52	FALSE	FALSE	FALSE	FALSE	0.011	0.049	0.0001	0.00074	0.37	0.34	0.9	0.032	0.27
fat	I	FBgn0030876	CG6762	32768	26.01	325.12	0.12	0.0032	0.24	0.044	0.42	0.74	FALSE	FALSE	FALSE	FALSE	0.065	0.17	0.00037	0.002	1.1	0.84	1	0.14	0.43
fat	I	FBgn0085257	CG34228	5740377	27.61	71.82	0.15	0.0024	0.27	0.036	0.2	0.8	FALSE	FALSE	FALSE	FALSE	0.34	0.51	0.91	0.94	0.014	0.2	0.74	0.014	0.21
fat	I	FBgn0264294	Cyt-b5	35688	33.37	14024.6	0.29	0.00048	0.44	0.011	0.17	0.81	FALSE	FALSE	FALSE	FALSE	0.77	0.86	0.52	0.62	0.1	0.11	0.58	0.0053	0.13
fat	I	FBgn0036623	CG4729	39820	31.76	3102.82	0.31	0.0004	0.46	0.0093	0.1	0.8	FALSE	FALSE	FALSE	FALSE	0.088	0.21	0.0021	0.0082	0.36	0.27	0.83	0.03	0.26
fat	I	FBgn0001091	Gapdh1	35728	36.01	13363.3	0.087	0.0067	0.18	0.074	0.11	0.56	FALSE	FALSE	FALSE	FALSE	0.00088	0.0083	7.5e-07	1.8e-05	0.47	0.57	1	0.079	0.35
fat	I	FBgn0022774	Oat	40145	32.13	2183.96	0.35	0.00029	0.5	0.0072	0.1	0.88	FALSE	FALSE	FALSE	FALSE	0.059	0.16	0.0013	0.0057	0.41	0.41	0.95	0.0067	0.15
fat	I	FBgn0037239	Sfxn1-3	40552	33.05	4490.63	0.089	0.0074	0.19	0.08	0.15	0.71	FALSE	FALSE	FALSE	FALSE	0.0032	0.021	3.6e-06	5.6e-05	0.53	0.66	1	0.072	0.34
fat	I	FBgn0266711	EloC	37237	31.1	1147.17	0.092	0.0084	0.19	0.086	0.26	0.6	FALSE	FALSE	FALSE	FALSE	0.2	0.36	0.0018	0.0071	0.53	0.37	0.92	0.011	0.19
fat	I	FBgn0031264	CG11835	33232	25.68	71.29	0.22	0.0017	0.37	0.028	0.68	0.83	FALSE	FALSE	FALSE	FALSE	0.96	0.98	0.25	0.36	0.64	0.35	0.9	0.0034	0.1
fat	I	FBgn0260653	serp	40150	23.05	317.43	0.44	0.00028	0.59	0.0071	0.26	0.81	FALSE	FALSE	FALSE	TRUE	0.018	0.072	0.01	0.029	-0.95	0.96	1	0.00063	0.037
fat	I	FBgn0034887	St1	37742	27.75	611.42	0.31	0.0012	0.46	0.022	0.46	1	FALSE	FALSE	FALSE	FALSE	0.32	0.5	0.023	0.055	1.1	0.68	1	0.02	0.24
fat	I	FBgn0051769	CG31769	318934	28.26	1629.22	0.29	0.0017	0.44	0.028	0.33	0.7	FALSE	FALSE	FALSE	FALSE	0.33	0.51	0.76	0.83	-0.094	0.58	1	0.0089	0.17
fat	I	FBgn0035227	Iml1	38176	23.98	3565.35	0.17	0.0066	0.3	0.074	0.98	0.7	FALSE	FALSE	FALSE	FALSE	0.058	0.16	0.17	0.26	-1	0.94	1	0.074	0.35
fat	I	FBgn0053509	CG33509	3346225	23.72	70.83	0.64	7.7e-05	0.76	0.0026	0.097	1.1	FALSE	FALSE	FALSE	FALSE	0.0027	0.019	4.2e-05	0.00037	1.1	0.98	1	0.1	0.39
fat	I	FBgn0037513	pyd3	40916	31.85	1074.51	0.23	0.0042	0.37	0.054	0.12	0.63	FALSE	FALSE	FALSE	FALSE	0.085	0.2	0.0013	0.0055	0.37	0.25	0.81	0.063	0.33
fat	I	FBgn0000181	bic	45827	33.23	9951.13	0.2	0.0056	0.34	0.067	0.12	0.47	FALSE	FALSE	FALSE	FALSE	0.043	0.13	0.095	0.17	-0.16	0.33	0.9	0.2	0.49
fat	I	FBgn0051997	CG31997	319064	28.44	260.24	0.29	0.0031	0.44	0.043	0.17	0.79	FALSE	FALSE	FALSE	FALSE	0.53	0.69	0.061	0.12	0.31	0.19	0.73	0.03	0.26
fat	I	FBgn0039875	sip3	43747	24.16	686.86	0.54	0.00035	0.67	0.0084	0.22	0.51	FALSE	FALSE	FALSE	FALSE	0.0039	0.024	4.9e-05	0.00041	1.9	0.99	1	0.063	0.33
fat	I	FBgn0042138	CG18815	59176	32.67	1800.96	0.36	0.0021	0.51	0.033	0.084	0.65	FALSE	FALSE	FALSE	FALSE	0.21	0.38	0.012	0.034	0.25	0.089	0.53	0.025	0.26
fat	I	FBgn0261955	kdn	31579	35.65	3029.65	0.56	0.00037	0.7	0.0087	0.045	0.62	FALSE	FALSE	FALSE	FALSE	0.15	0.3	0.014	0.038	0.21	0.058	0.44	0.0057	0.13
fat	I	FBgn0036300	Pmm2	39436	30.43	495.69	0.63	0.00019	0.75	0.0051	0.039	0.63	FALSE	FALSE	FALSE	FALSE	0.00078	0.0076	8.1e-06	0.00011	0.5	0.85	1	0.063	0.33
fat	I	FBgn0027280	l(1)G0193	31712	26.99	2411.12	0.25	0.007	0.4	0.077	0.18	0.42	FALSE	FALSE	FALSE	FALSE	0.82	0.9	0.4	0.52	0.13	0.1	0.56	0.4	0.66
fat	I	FBgn0086768	Pcmt	40668	28.47	805.89	0.49	0.0011	0.63	0.02	0.062	0.74	FALSE	FALSE	FALSE	FALSE	2.6e-05	0.00066	8.9e-08	3.3e-06	0.76	0.99	1	0.033	0.27
fat	I	FBgn0035076	Ance-5	37980	23.58	1921.28	0.32	0.0045	0.48	0.057	0.49	0.79	FALSE	FALSE	FALSE	FALSE	0.18	0.34	0.35	0.47	-0.46	0.81	1	0.019	0.24
fat	I	FBgn0026372	RpL23A	38208	33.61	12644.2	0.54	0.00099	0.68	0.019	0.065	0.85	FALSE	FALSE	FALSE	FALSE	0.0028	0.019	0.00046	0.0025	-0.45	0.87	1	0.019	0.24
fat	I	FBgn0035805	CG7506	38857	27.16	118.83	0.53	0.0012	0.67	0.022	0.14	0.84	FALSE	FALSE	FALSE	FALSE	0.29	0.46	0.37	0.49	-0.2	0.5	1	0.39	0.65
fat	I	FBgn0019830	colt	33470	32.58	6594.7	0.43	0.0031	0.57	0.043	0.065	0.85	FALSE	FALSE	FALSE	FALSE	0.39	0.57	0.056	0.11	0.16	0.024	0.3	0.039	0.28
fat	I	FBgn0045842	yuri	34894	27.47	1063.37	0.34	0.0073	0.49	0.079	0.14	0.55	FALSE	FALSE	FALSE	TRUE	0.57	0.72	0.09	0.17	0.25	0.14	0.63	0.003	0.095
fat	I	FBgn0250746	Prosbeta7	40639	32.18	3800.19	0.35	0.0079	0.5	0.083	0.081	0.56	FALSE	FALSE	FALSE	FALSE	0.79	0.88	0.19	0.3	0.11	0.0093	0.21	0.19	0.48
fat	I	FBgn0039697	CG7834	43515	35.14	5060.57	0.38	0.0065	0.54	0.073	0.072	0.72	FALSE	FALSE	FALSE	FALSE	0.03	0.1	0.00054	0.0028	0.34	0.27	0.83	0.041	0.29
fat	I	FBgn0028648	mRpL50	38796	26.58	111.44	0.52	0.0028	0.66	0.04	0.077	0.73	FALSE	FALSE	FALSE	FALSE	0.022	0.081	0.0097	0.028	-0.34	0.67	1	0.74	0.87
fat	I	FBgn0027785	NP15.6	42282	29.45	1703.32	0.37	0.0083	0.52	0.086	0.12	0.59	FALSE	FALSE	FALSE	FALSE	0.018	0.069	0.00022	0.0014	0.61	0.78	1	0.023	0.25
fat	I	FBgn0014163	fax	39826	30.88	842.43	0.86	8.5e-05	0.91	0.0028	0.017	0.58	FALSE	FALSE	FALSE	FALSE	0.3	0.48	0.11	0.19	0.16	0.073	0.49	0.048	0.3
fat	I	FBgn0052850	CG32850	318246	25.03	466.14	0.65	0.0013	0.76	0.023	0.18	0.84	FALSE	FALSE	FALSE	FALSE	0.83	0.9	0.45	0.56	0.3	0.34	0.9	0.015	0.21
fat	I	FBgn0022023	eIF3h	45682	31.55	5145.48	0.73	0.00055	0.82	0.012	0.022	0.56	FALSE	FALSE	FALSE	FALSE	0.83	0.9	0.52	0.63	0.041	0.00088	0.13	0.011	0.19
fat	I	FBgn0035639	kri	38655	25.37	840.98	0.6	0.0021	0.73	0.033	0.45	0.56	FALSE	FALSE	FALSE	FALSE	0.84	0.9	0.42	0.54	0.7	0.47	0.98	0.16	0.45
fat	I	FBgn0028429	I-2	39156	29.05	959.69	0.49	0.0055	0.63	0.066	0.092	0.55	FALSE	FALSE	FALSE	FALSE	0.012	0.053	0.00021	0.0013	0.6	0.82	1	0.022	0.25
fat	I	FBgn0039685	Obp99b	43497	26.66	601.33	0.92	4.8e-05	0.95	0.0018	0.027	1.4	FALSE	FALSE	FALSE	FALSE	0.0037	0.024	0.00014	0.00097	1.2	0.99	1	0.2	0.49
fat	I	FBgn0034576	ND-B14.7	37385	29.8	2372.54	0.43	0.01	0.58	0.098	0.11	0.63	FALSE	FALSE	FALSE	FALSE	0.38	0.55	0.64	0.73	-0.062	0.18	0.71	0.031	0.27
fat	I	FBgn0263200	Galt	33935	32.3	5326.63	0.44	0.009	0.59	0.091	0.083	0.76	FALSE	FALSE	FALSE	FALSE	0.063	0.17	0.0022	0.0083	0.38	0.39	0.94	0.05	0.3
fat	I	FBgn0014002	Pdi	39651	34.91	15275.7	0.55	0.0048	0.69	0.06	0.037	0.52	FALSE	FALSE	FALSE	FALSE	0.09	0.21	0.0057	0.018	0.19	0.02	0.28	0.087	0.37
fat	I	FBgn0038849	CG7079	42488	23.22	465.35	0.73	0.0017	0.82	0.028	0.26	0.91	FALSE	FALSE	FALSE	FALSE	0.63	0.77	0.31	0.43	0.77	0.56	1	0.08	0.35
fat	I	FBgn0025608	Faf2	35129	29.14	1731.02	0.66	0.0038	0.77	0.05	0.053	0.35	FALSE	FALSE	FALSE	FALSE	0.0083	0.041	0.0015	0.0063	-0.44	0.81	1	0.013	0.2
fat	I	FBgn0000044	Act57B	37368	37.31	4403.77	0.78	0.0013	0.86	0.023	0.023	0.79	FALSE	FALSE	FALSE	FALSE	0.0037	0.024	0.00032	0.0018	-0.36	0.65	1	0.021	0.24
fat	I	FBgn0010638	Sec61beta	46080	29.52	744.74	0.8	0.0019	0.87	0.03	0.053	0.49	FALSE	FALSE	FALSE	FALSE	0.32	0.5	0.11	0.19	0.34	0.43	0.97	0.0076	0.16
fat	I	FBgn0001247	Ide	40248	29.94	1026.55	0.71	0.0058	0.8	0.068	0.044	0.33	FALSE	FALSE	FALSE	FALSE	0.88	0.93	0.88	0.91	0.018	0.036	0.36	0.0035	0.1
fat	I	FBgn0023535	arg	46717	32.07	3630.09	0.7	0.0083	0.8	0.086	0.035	0.78	FALSE	FALSE	FALSE	FALSE	0.033	0.11	0.0018	0.0072	0.33	0.35	0.9	0.023	0.25
fat	I	FBgn0032400	CG6770	34621	28.29	8556.32	0.94	0.00068	0.96	0.014	0.02	0.94	FALSE	FALSE	FALSE	TRUE	0.053	0.15	0.0077	0.023	0.82	0.88	1	0.00095	0.05
fat	I	FBgn0030753	rngo	32616	30.23	1229.6	0.77	0.01	0.85	0.099	0.028	0.42	FALSE	FALSE	FALSE	FALSE	0.38	0.56	0.34	0.46	-0.094	0.064	0.46	0.023	0.25
fat	I	FBgn0034117	CG7997	36829	30.65	1595.68	0.96	0.00048	0.97	0.011	0.0044	0.77	FALSE	FALSE	FALSE	FALSE	1.1e-05	0.00036	1e-07	3.7e-06	0.75	1	1	0.1	0.39
fat	I	FBgn0016119	ATPsynCF6	42759	33.65	1622.81	0.85	0.0055	0.9	0.066	0.026	0.55	FALSE	FALSE	FALSE	FALSE	0.27	0.44	0.17	0.27	-0.19	0.26	0.82	0.0045	0.12
fat	I	FBgn0027554	CG8042	38886	28.77	1284.02	0.82	0.0096	0.89	0.095	0.029	0.53	FALSE	FALSE	FALSE	FALSE	0.051	0.15	0.0052	0.017	0.41	0.59	1	0.11	0.39
fat	I	FBgn0038678	mRpL55	42290	26.98	72.11	0.97	0.00095	0.98	0.018	0.0062	0.74	FALSE	FALSE	FALSE	FALSE	0.0054	0.031	0.00034	0.0019	-0.64	0.93	1	0.2	0.49
fat	I	FBgn0040001	FASN3	3355111	36.45	43061.5	0.91	0.01	0.94	0.1	0.0064	0.75	FALSE	FALSE	FALSE	FALSE	0.004	0.025	0.00025	0.0015	-0.26	0.2	0.74	0.019	0.24
fat	II	FBgn0261675	Npc1b	33072	24.17	122.84	0.00066	3.6e-12	0.0043	9.2e-10	2.9	-1.9	TRUE	FALSE	FALSE	FALSE	0.048	0.14	0.27	0.39	0.8	0.95	1	0.12	0.4
fat	II	FBgn0025390	Mur2B	31111	25.83	2635.34	0.00066	1.8e-09	0.0043	2.3e-07	2.4	-1.5	TRUE	TRUE	FALSE	FALSE	0.00048	0.0053	0.073	0.14	-1.1	1	1	0.81	0.91
fat	II	FBgn0029697	CG15570	31366	28.56	811.09	0.0002	0.00062	0.0017	0.013	2.6	-1.1	TRUE	TRUE	FALSE	FALSE	0.0027	0.019	0.8	0.86	-0.14	1	1	0.49	0.73
fat	II	FBgn0032127	CG13114	34272	25.62	393.54	0.00026	0.00093	0.0021	0.018	2.3	-1.1	TRUE	TRUE	FALSE	FALSE	3.1e-08	8.2e-06	9.2e-08	3.4e-06	-4.4	1	1	0.74	0.88
fat	II	FBgn0000360	Cp38	31788	30.68	4486.55	0.0042	0.00084	0.019	0.016	1.5	-1.1	TRUE	TRUE	FALSE	FALSE	1.1e-06	7.6e-05	1.9e-06	3.6e-05	-3.1	1	1	0.89	0.95
fat	II	FBgn0035328	yellow-g2	38295	27.35	1007.22	0.0012	0.0034	0.0069	0.047	1.8	-0.94	TRUE	TRUE	FALSE	FALSE	8.5e-05	0.0015	0.0039	0.014	-1.5	1	1	0.26	0.55
fat	II	FBgn0041709	yellow-g	38294	28.42	633.83	0.0041	0.0019	0.018	0.03	1.5	-1.1	TRUE	TRUE	FALSE	FALSE	7.7e-05	0.0014	0.001	0.0046	-1.8	1	1	0.78	0.89
fat	II	FBgn0263038	CG43333	34830	25.41	43.46	0.0034	0.0035	0.016	0.047	0.41	-1.1	TRUE	FALSE	FALSE	FALSE	0.0054	0.03	0.29	0.4	-0.13	0.88	1	0.74	0.87
fat	II	FBgn0000454	Dip-B	48450	32.3	2729.67	0.004	0.0064	0.018	0.073	0.28	-0.51	TRUE	FALSE	TRUE	FALSE	0.2	0.37	0.17	0.27	0.12	0.072	0.48	0.013	0.2
fat	II	FBgn0037974	CG12224	41453	27.34	250.52	0.068	0.0011	0.15	0.02	0.56	-0.76	TRUE	FALSE	FALSE	FALSE	0.73	0.84	0.025	0.06	0.7	0.32	0.88	0.55	0.77
fat	II	FBgn0000359	Cp36	31787	32.09	6760.46	0.025	0.006	0.072	0.07	1.3	-0.85	TRUE	TRUE	FALSE	FALSE	6.2e-05	0.0012	0.00011	0.00081	-2.6	1	1	0.74	0.88
fat	II	FBgn0038611	CG14309	42212	28.72	776.32	0.028	0.0059	0.078	0.07	0.63	-1.1	TRUE	TRUE	FALSE	FALSE	6.6e-06	0.00025	4.3e-06	6.3e-05	-1.7	1	1	0.16	0.45
fat	II	FBgn0026314	Ugt35b	41333	23.72	101.84	0.9	1e-06	0.93	6.4e-05	0.052	-2	TRUE	FALSE	FALSE	FALSE	0.65	0.78	0.44	0.55	0.32	0.45	0.97	0.014	0.2
fat	II	FBgn0027570	Nep2	40588	26.68	570.76	0.47	0.00078	0.61	0.016	0.12	-1.1	TRUE	FALSE	FALSE	FALSE	0.0017	0.013	0.0003	0.0017	-0.72	0.98	1	0.038	0.28
fat	II	FBgn0261885	osa	42130	24.64	1486.55	0.3	0.0034	0.45	0.046	0.2	-0.59	TRUE	FALSE	FALSE	FALSE	0.19	0.35	0.39	0.5	-0.17	0.53	1	0.15	0.44
fat	II	FBgn0015477	Rme-8	35939	28.14	1719.53	0.56	0.0023	0.7	0.036	0.05	-0.38	TRUE	FALSE	FALSE	FALSE	0.01	0.047	0.0028	0.01	-0.29	0.51	1	0.51	0.74
fat	II	FBgn0034935	Orcokinin	37806	25.89	23.86	0.72	0.0019	0.81	0.03	0.11	-1.3	TRUE	FALSE	FALSE	FALSE	0.66	0.78	0.33	0.45	0.31	0.38	0.92	0.0043	0.11
fat	II	FBgn0010247	Parp	3355109	23.5	5584.15	0.86	0.001	0.91	0.019	0.14	-1.2	TRUE	FALSE	FALSE	FALSE	0.26	0.44	0.16	0.26	-1.1	0.79	1	0.034	0.27
fat	III	FBgn0033774	CG12374	36410	24.49	23035.1	2.1e-11	1.9e-13	1.4e-08	6.5e-11	-6.2	-2.9	FALSE	TRUE	FALSE	TRUE	2e-07	2.7e-05	0.0042	0.014	-1.4	1	1	4.4e-08	1.3e-05
fat	III	FBgn0033733	CG8834	36356	25.46	727.32	4.2e-08	3e-13	2.6e-06	9.4e-11	-7	-2.7	FALSE	TRUE	FALSE	TRUE	3.7e-07	4e-05	0.064	0.13	1.5	1	1	4.4e-08	1.3e-05
fat	III	FBgn0034406	Jheh3	37182	26.3	526.87	4.1e-07	1.8e-13	1.2e-05	6.3e-11	-4.5	-1.5	FALSE	TRUE	FALSE	TRUE	3.3e-05	0.00081	1	1	-0.00043	1	1	8.1e-06	0.0011
fat	III	FBgn0035665	Jon65Aiii	38683	24.91	3700.76	6.5e-07	1.5e-17	1.8e-05	1.1e-14	-3.5	-3.1	FALSE	TRUE	FALSE	TRUE	6.3e-05	0.0012	0.86	0.91	-0.081	1	1	6.2e-12	1e-08
fat	III	FBgn0250815	Jon65Aiv	38682	24.67	3804.09	0.0026	1.3e-19	0.013	1.7e-16	-2.3	-3.1	FALSE	FALSE	FALSE	TRUE	0.018	0.072	0.88	0.91	0.1	0.98	1	5.6e-12	1e-08
fat	III	FBgn0040060	yip7	38680	24.89	3378.05	1.6e-06	8.4e-13	3.8e-05	2.3e-10	-2.8	-2.8	FALSE	TRUE	FALSE	TRUE	1.4e-05	0.00042	0.2	0.3	0.53	1	1	7.8e-06	0.0011
fat	III	FBgn0033297	Mal-A8	35830	24.29	413.81	4.9e-06	3.7e-13	8.8e-05	1e-10	-2.9	-2.8	FALSE	TRUE	FALSE	TRUE	0.00018	0.0027	0.85	0.89	0.089	1	1	2.7e-10	1.3e-07
fat	III	FBgn0034468	Obp56a	37264	29.76	108.2	8.5e-12	5.6e-06	8.3e-09	0.00027	-1.8	-1.7	FALSE	FALSE	FALSE	FALSE	0.00023	0.0032	3.7e-08	1.7e-06	-1.1	0.99	1	0.38	0.65
fat	III	FBgn0050360	Mal-A6	246565	27.5	4582.02	0.00036	5.1e-15	0.0027	2.5e-12	-4.3	-3	FALSE	TRUE	FALSE	TRUE	6.1e-05	0.0012	0.0081	0.024	2.9	1	1	2.8e-13	8.9e-10
fat	III	FBgn0038740	CG4562	42362	24.16	516.78	6.1e-09	5.6e-08	6.9e-07	5.1e-06	-3.5	-2	FALSE	TRUE	FALSE	TRUE	6.2e-07	5.1e-05	0.77	0.83	0.1	1	1	0.0027	0.092
fat	III	FBgn0011834	Ser6	33073	24.2	161.62	5.3e-06	2.1e-11	9.6e-05	4.4e-09	-1.9	-2.3	FALSE	TRUE	FALSE	TRUE	3.1e-05	0.00077	0.17	0.27	0.42	1	1	7.1e-07	0.00015
fat	III	FBgn0003863	alphaTry	48316	23.63	8005.83	0.00029	1.9e-14	0.0023	8.5e-12	-2.3	-2.9	FALSE	TRUE	FALSE	TRUE	0.0037	0.024	0.83	0.88	0.11	0.99	1	8.3e-10	3.4e-07
fat	III	FBgn0036752	Adgf-A	39976	28.91	233.47	2.1e-05	3.7e-12	0.00029	9.2e-10	-0.62	-1.5	FALSE	FALSE	FALSE	TRUE	0.17	0.33	0.0016	0.0067	-0.4	0.22	0.76	0.00013	0.011
fat	III	FBgn0032373	Vha100-5	34587	23.97	375.55	8e-07	6.5e-10	2.2e-05	9e-08	-3.7	-2.1	FALSE	TRUE	FALSE	TRUE	0.00015	0.0023	0.55	0.66	-0.3	1	1	4.3e-06	0.00067
fat	III	FBgn0040256	Ugt86Dd	53507	25.43	347.38	9.6e-07	1.7e-09	2.5e-05	2.2e-07	-3.8	-1.2	FALSE	TRUE	FALSE	FALSE	3.3e-06	0.00015	0.049	0.1	1.1	1	1	0.28	0.57
fat	III	FBgn0038973	Pebp1	42644	28.44	228.01	2.5e-07	2.6e-08	9.1e-06	2.6e-06	-6.4	-2.1	FALSE	TRUE	FALSE	TRUE	3.8e-07	4e-05	0.0076	0.023	2.4	1	1	3.3e-05	0.0036
fat	III	FBgn0051004	mesh	43688	24.53	339.86	0.00056	1e-12	0.0038	2.7e-10	-2.8	-2	FALSE	TRUE	FALSE	TRUE	0.00013	0.0021	0.015	0.039	1.8	1	1	8.8e-05	0.0084
fat	III	FBgn0023197	Jon74E	39959	23.93	932.95	2.4e-08	1.6e-06	1.7e-06	9.2e-05	-4.6	-1.9	FALSE	TRUE	FALSE	TRUE	4.9e-07	4.7e-05	0.19	0.29	0.67	1	1	5e-07	0.00011
fat	III	FBgn0002570	Mal-A1	35824	28.52	4619.36	0.0049	3.5e-14	0.021	1.4e-11	-3.7	-2.8	FALSE	TRUE	FALSE	TRUE	0.00034	0.004	0.007	0.022	3.5	1	1	2e-11	2.4e-08
fat	III	FBgn0036766	CG5506	39992	24.28	583.94	0.0068	3.4e-14	0.027	1.4e-11	-1.9	-2.8	FALSE	TRUE	FALSE	TRUE	0.005	0.029	0.16	0.26	0.9	0.99	1	2.2e-06	0.00039
fat	III	FBgn0002569	Mal-A2	35825	23.94	184.81	8.3e-06	1.3e-08	0.00014	1.3e-06	-3.4	-2.1	FALSE	TRUE	FALSE	TRUE	0.00049	0.0053	0.87	0.91	-0.095	1	1	2.9e-06	0.00047
fat	III	FBgn0051104	CG31104	43054	25.17	96.9	0.00019	1.3e-10	0.0017	2.2e-08	-4	-2.5	FALSE	TRUE	FALSE	TRUE	0.00015	0.0023	0.048	0.1	1.8	1	1	2.1e-08	6.7e-06
fat	III	FBgn0038082	CG5724	41573	24.21	108.85	0.00017	1.8e-10	0.0015	3e-08	-2.5	-2.4	FALSE	FALSE	FALSE	TRUE	0.029	0.1	0.18	0.28	-0.74	0.96	1	8.7e-07	0.00018
fat	III	FBgn0051233	CG31233	42557	24.48	187.13	1.4e-07	1.3e-06	6.1e-06	7.9e-05	-4.9	-1.9	FALSE	TRUE	FALSE	TRUE	6.9e-06	0.00025	0.63	0.72	0.29	1	1	0.00086	0.047
fat	III	FBgn0010246	Myo61F	38153	30.36	1348.46	2.1e-08	2.2e-05	1.6e-06	0.00089	-1.1	-0.96	FALSE	TRUE	FALSE	FALSE	6.1e-05	0.0012	0.043	0.091	-0.24	1	1	0.071	0.34
fat	III	FBgn0030775	CG9673	32649	24.61	107.34	0.00023	6.9e-09	0.0019	7.9e-07	-2.2	-2	FALSE	TRUE	FALSE	TRUE	0.0019	0.014	0.58	0.68	0.28	1	1	8.2e-05	0.008
fat	III	FBgn0033296	Mal-A7	35829	25.01	493.34	2.5e-05	2e-07	0.00032	1.6e-05	-3.6	-2	FALSE	TRUE	FALSE	TRUE	3e-06	0.00013	0.0012	0.0053	2.4	1	1	7.8e-11	4.4e-08
fat	III	FBgn0032775	CG17544	35213	25.81	617.57	2.7e-07	2.9e-05	9.5e-06	0.0012	-4.4	-1.1	FALSE	TRUE	FALSE	TRUE	4.7e-05	0.001	0.63	0.73	-0.26	1	1	0.00035	0.024
fat	III	FBgn0019643	AANAT1	37867	27.13	573.8	1.2e-06	1.6e-05	3.1e-05	0.00071	-1.3	-0.91	FALSE	TRUE	FALSE	FALSE	1.8e-06	0.0001	0.015	0.039	0.48	1	1	0.029	0.26
fat	III	FBgn0039316	CG11893	43056	26.56	128.1	4.3e-09	0.0015	5.3e-07	0.026	-3	-1.1	FALSE	TRUE	FALSE	FALSE	1e-07	1.7e-05	0.14	0.23	0.43	1	1	0.8	0.91
fat	III	FBgn0033593	Listericin	36183	27.15	85.92	3.1e-05	1.3e-06	0.00038	7.7e-05	-1.3	-1.6	FALSE	FALSE	FALSE	FALSE	0.91	0.95	2.2e-05	0.00022	-1.3	0.18	0.7	0.53	0.76
fat	III	FBgn0039310	CG11878	43050	27.39	308.78	1.3e-07	0.00024	5.5e-06	0.0063	-1.8	-1.1	FALSE	FALSE	FALSE	FALSE	0.07	0.18	2.1e-05	0.00021	-1.2	0.78	1	0.051	0.31
fat	III	FBgn0028491	CG2930	31341	25.62	983.01	4.6e-08	0.0011	2.8e-06	0.02	-1.7	-0.93	FALSE	TRUE	FALSE	FALSE	2.8e-05	0.0007	0.26	0.37	-0.22	1	1	0.055	0.32
fat	III	FBgn0034470	Obp56d	37266	31.61	467.55	1.9e-07	0.00057	7.4e-06	0.012	-0.93	-1.1	FALSE	FALSE	FALSE	FALSE	0.049	0.14	5.9e-05	0.00047	-0.59	0.49	1	0.95	0.98
fat	III	FBgn0027843	CAH2	39390	24.29	494.05	0.072	6.1e-12	0.16	1.4e-09	-1.2	-1.4	FALSE	FALSE	FALSE	TRUE	0.53	0.69	0.33	0.45	-0.62	0.6	1	9.1e-08	2.5e-05
fat	III	FBgn0010357	betaTry	47901	25.42	4953.42	0.19	8.9e-14	0.33	3.5e-11	-0.68	-2.8	FALSE	FALSE	FALSE	TRUE	0.0047	0.028	0.0049	0.016	1.6	0.99	1	9e-11	4.9e-08
fat	III	FBgn0261575	tobi	43072	30.01	5916.19	1.9e-06	0.00019	4.2e-05	0.0051	-1.6	-1.2	FALSE	TRUE	FALSE	FALSE	1.8e-06	0.0001	0.0095	0.028	0.68	1	1	0.092	0.37
fat	III	FBgn0000078	Amy-d	36932	26.9	2623.37	0.0067	8.6e-09	0.027	9.4e-07	-1.1	-2.1	FALSE	TRUE	FALSE	TRUE	1.1e-05	0.00036	3.7e-05	0.00033	1.9	1	1	7.8e-12	1.1e-08
fat	III	FBgn0054026	CG34026	3885569	25.29	96.77	0.061	3.7e-11	0.14	7.2e-09	-0.46	-2.6	FALSE	FALSE	FALSE	TRUE	2.3e-05	0.0006	1.1e-05	0.00013	1.4	1	1	8.2e-10	3.4e-07
fat	III	FBgn0033787	CG13321	36430	28.31	266.53	5.1e-05	1.7e-05	0.00056	0.00072	-0.75	-1.4	FALSE	TRUE	FALSE	TRUE	3.7e-05	0.00087	0.027	0.063	0.34	1	1	0.003	0.095
fat	III	FBgn0024315	Picot	36865	24.2	452.75	1.5e-07	0.0025	6.2e-06	0.037	-3.3	-0.81	FALSE	TRUE	FALSE	FALSE	1.5e-06	9.4e-05	0.12	0.2	0.65	1	1	0.3	0.59
fat	III	FBgn0034225	veil	36968	25.15	371.98	0.0073	2.4e-08	0.029	2.4e-06	-2	-1.7	FALSE	FALSE	FALSE	TRUE	0.33	0.51	0.12	0.21	-1.1	0.73	1	1.4e-05	0.0017
fat	III	FBgn0031689	Cyp28d1	33749	27.42	515.68	1.1e-07	0.0064	5.1e-06	0.073	-1.3	-0.79	FALSE	FALSE	FALSE	FALSE	0.0012	0.011	0.006	0.019	-0.48	0.98	1	0.15	0.44
fat	III	FBgn0051288	CG31288	318664	27.53	168.58	6.9e-05	6.8e-05	0.00071	0.0023	-0.86	-1.3	FALSE	TRUE	FALSE	FALSE	3.3e-05	0.0008	0.017	0.043	0.44	1	1	0.0038	0.11
fat	III	FBgn0037930	CG14715	41403	28.49	388.28	6.9e-05	9.7e-05	0.00071	0.0031	-0.55	-0.93	FALSE	FALSE	FALSE	FALSE	0.11	0.24	0.012	0.034	-0.3	0.28	0.84	0.61	0.8
fat	III	FBgn0260746	Ect3	41457	28.49	157.72	4.7e-05	0.00014	0.00053	0.0042	-0.52	-0.96	FALSE	FALSE	FALSE	FALSE	0.054	0.15	0.026	0.061	-0.24	0.35	0.9	0.0096	0.17
fat	III	FBgn0260960	Baldspot	39860	27.18	2276.79	2.1e-07	0.0081	7.9e-06	0.085	-1.4	-0.57	FALSE	TRUE	FALSE	FALSE	3.2e-05	0.00079	0.73	0.81	-0.061	1	1	0.82	0.92
fat	III	FBgn0039073	CG4408	42762	26.43	439.21	1.9e-05	0.0005	0.00026	0.011	-1	-0.57	FALSE	TRUE	FALSE	FALSE	0.0002	0.0029	0.43	0.55	0.14	1	1	0.15	0.44
fat	III	FBgn0259101	CG42249	32043	24.56	685.53	0.01	2.2e-07	0.036	1.7e-05	-1.6	-1.3	FALSE	FALSE	FALSE	TRUE	0.088	0.21	0.75	0.82	-0.18	0.91	1	0.00031	0.022
fat	III	FBgn0034160	CG5550	36883	25.83	55.68	0.059	5.4e-09	0.14	6.4e-07	-1.4	-2.3	FALSE	FALSE	FALSE	TRUE	0.023	0.084	0.15	0.25	1	0.98	1	6.2e-07	0.00013
fat	III	FBgn0042119	Cpr65Au	59158	30.83	324.7	0.001	4.4e-05	0.0062	0.0017	-0.92	-1	FALSE	FALSE	FALSE	FALSE	0.04	0.12	0.44	0.55	-0.19	0.88	1	0.15	0.44
fat	III	FBgn0032456	MRP	34686	31.19	2389.82	0.00028	0.0003	0.0022	0.0074	-0.21	-0.43	FALSE	FALSE	TRUE	FALSE	0.023	0.084	0.33	0.45	-0.047	0.0084	0.21	0.017	0.23
fat	III	FBgn0038135	CG8773	41634	23.09	305.8	0.0064	8e-06	0.026	0.00037	-2.1	-1.7	FALSE	FALSE	FALSE	TRUE	0.54	0.7	0.041	0.089	-1.5	0.61	1	0.00012	0.01
fat	III	FBgn0041711	yellow-e	41653	28.15	30.02	5.6e-06	0.0099	9.9e-05	0.097	-0.87	-1	FALSE	FALSE	FALSE	FALSE	0.067	0.17	0.002	0.0077	-0.49	0.57	1	0.045	0.3
fat	III	FBgn0010038	GstD2	48335	23.32	38.35	0.0067	2.3e-05	0.027	0.00092	-2	-1.5	FALSE	FALSE	FALSE	FALSE	0.31	0.49	0.13	0.22	-1.1	0.75	1	0.07	0.34
fat	III	FBgn0035094	CG9380	38011	25.47	278.8	0.031	2.3e-06	0.084	0.00013	-1	-1.5	FALSE	FALSE	FALSE	FALSE	0.52	0.68	0.17	0.27	-0.62	0.54	1	0.017	0.22
fat	III	FBgn0050489	Cyp12d1-p	246648	28.64	859.84	0.00013	0.0047	0.0012	0.059	-0.53	-0.85	FALSE	TRUE	FALSE	FALSE	9.8e-08	1.7e-05	9.6e-07	2.2e-05	0.79	1	1	0.73	0.87
fat	III	FBgn0039342	CG5107	43084	23.45	1376.72	0.42	9.7e-10	0.57	1.3e-07	-0.53	-2.4	FALSE	FALSE	FALSE	TRUE	0.84	0.91	0.59	0.69	-0.35	0.43	0.96	3e-07	7e-05
fat	III	FBgn0003356	Jon99Cii	43543	23.98	2243.3	0.11	4.1e-07	0.22	2.9e-05	-1	-1.9	FALSE	FALSE	FALSE	TRUE	0.48	0.65	0.52	0.63	-0.4	0.63	1	2.8e-06	0.00046
fat	III	FBgn0030929	CG15043	32835	28.34	272.79	0.17	1.4e-07	0.3	1.2e-05	-0.24	-2.1	FALSE	FALSE	FALSE	TRUE	0.012	0.054	0.022	0.055	0.43	0.91	1	2.4e-05	0.0027
fat	III	FBgn0053970	CG33970	43186	23.91	255.79	0.11	9.6e-07	0.21	6.1e-05	-0.78	-1.6	FALSE	FALSE	FALSE	FALSE	0.31	0.49	0.82	0.87	-0.11	0.69	1	0.024	0.25
fat	III	FBgn0032727	CG10623	35153	29.75	736.34	0.0022	0.0023	0.011	0.035	-0.44	-0.56	FALSE	FALSE	TRUE	FALSE	0.94	0.97	0.0018	0.0071	-0.46	0.039	0.36	0.2	0.5
fat	III	FBgn0035926	CG5804	39005	27.15	73.73	0.03	9.3e-05	0.083	0.003	-2.5	-1.4	FALSE	FALSE	FALSE	FALSE	0.66	0.79	0.1	0.18	-1.9	0.59	1	0.38	0.65
fat	III	FBgn0263397	Ih	36589	25.57	691.11	0.0019	0.0064	0.01	0.073	-1.3	-0.57	FALSE	FALSE	FALSE	FALSE	0.055	0.15	0.47	0.58	-0.27	0.91	1	0.12	0.41
fat	III	FBgn0021764	sdk	31017	26.46	1703.66	0.0032	0.0048	0.015	0.06	-1.1	-0.37	FALSE	FALSE	FALSE	FALSE	0.16	0.31	0.2	0.31	-0.42	0.76	1	0.05	0.3
fat	III	FBgn0037975	CG3397	41454	31.23	609.17	0.0032	0.0063	0.015	0.072	-0.42	-0.73	FALSE	TRUE	FALSE	FALSE	1.5e-06	9.5e-05	3.9e-06	5.8e-05	0.82	1	1	0.55	0.77
fat	III	FBgn0016123	Alp4	43671	27.21	1166.49	0.0097	0.0022	0.035	0.034	-1.2	-0.86	FALSE	FALSE	FALSE	FALSE	0.14	0.29	8.2e-05	0.00062	-2.1	0.83	1	0.18	0.47
fat	III	FBgn0033482	CG1371	36053	32.03	1642.86	0.01	0.0021	0.037	0.033	-0.2	-0.28	FALSE	FALSE	TRUE	FALSE	0.43	0.61	0.00087	0.004	-0.28	0.0092	0.21	0.86	0.94
fat	III	FBgn0034307	CG10914	37075	24.06	142.17	0.053	0.00029	0.13	0.0073	-1.2	-0.79	FALSE	FALSE	FALSE	TRUE	0.72	0.84	0.14	0.23	-0.91	0.48	0.99	0.0014	0.064
fat	III	FBgn0033216	CG1946	35720	23.43	42.52	0.98	2.8e-11	0.99	5.8e-09	-0.0091	-2.5	FALSE	FALSE	FALSE	TRUE	0.14	0.29	0.045	0.095	0.74	0.79	1	2.2e-07	5.7e-05
fat	III	FBgn0032915	l(2)05287	35374	25.91	869.09	0.04	0.0051	0.1	0.062	-0.82	-0.64	FALSE	FALSE	FALSE	TRUE	0.0042	0.026	2.2e-06	4e-05	-2.5	0.99	1	0.0022	0.084
fat	III	FBgn0033789	CG13324	36434	24.32	61.04	0.62	6.8e-06	0.74	0.00032	-0.34	-1.8	FALSE	FALSE	FALSE	TRUE	0.011	0.051	0.00029	0.0017	-3	0.99	1	0.0013	0.061
fat	III	FBgn0038146	CG9799	41647	23.79	877.49	0.059	0.0069	0.14	0.076	-1.4	-0.51	FALSE	FALSE	FALSE	FALSE	0.16	0.31	0.0007	0.0034	-2.8	0.86	1	0.0076	0.16
fat	III	FBgn0003189	r	32640	30.07	1831.1	0.21	0.0012	0.35	0.022	-0.11	-0.87	FALSE	FALSE	FALSE	FALSE	0.19	0.36	0.0049	0.016	-0.27	0.075	0.49	0.013	0.2
fat	III	FBgn0052633	CG32633	326225	23.24	27.78	0.11	0.0057	0.21	0.067	-1.1	-1.1	FALSE	FALSE	FALSE	FALSE	0.52	0.68	0.45	0.56	-0.48	0.61	1	0.22	0.52
fat	III	FBgn0086451	l(2)k09022	33960	25.51	1135.41	0.45	0.0002	0.59	0.0055	-0.33	-0.62	FALSE	FALSE	FALSE	TRUE	0.004	0.025	3.8e-05	0.00034	-2.3	0.99	1	0.002	0.079
fat	III	FBgn0001089	Gal	33839	28.23	485.92	0.19	0.0048	0.33	0.06	-0.19	-0.71	FALSE	FALSE	FALSE	TRUE	0.013	0.056	0.02	0.05	0.35	0.84	1	0.0018	0.074
fat	III	FBgn0053126	NLaz	33324	29.13	1347.85	0.22	0.0037	0.36	0.05	-0.32	-0.78	FALSE	FALSE	FALSE	FALSE	0.69	0.81	0.083	0.16	-0.47	0.3	0.86	0.0091	0.17
fat	III	FBgn0022702	Cht2	38223	24.02	365.01	0.26	0.0028	0.41	0.04	-0.6	-1.1	FALSE	FALSE	FALSE	FALSE	0.34	0.52	0.021	0.052	-1.3	0.69	1	0.013	0.2
fat	III	FBgn0039479	CG14257	43257	26.25	17.08	0.24	0.0064	0.39	0.073	-0.29	-1	FALSE	FALSE	FALSE	FALSE	0.84	0.9	0.37	0.49	-0.22	0.22	0.76	0.31	0.59
fat	III	FBgn0027085	LeuRS-m	38581	24.5	672.17	0.42	0.0016	0.57	0.027	-0.25	-0.45	FALSE	FALSE	FALSE	FALSE	0.05	0.14	0.046	0.097	0.65	0.9	1	0.023	0.25
fat	III	FBgn0053493	CG33493	2768994	24.64	445.27	0.21	0.0096	0.35	0.095	-0.71	-0.77	FALSE	FALSE	FALSE	FALSE	0.0015	0.012	0.00086	0.004	2.2	1	1	0.52	0.75
fat	III	FBgn0039302	Nup358	43041	31.72	3639.28	0.34	0.004	0.5	0.053	-0.059	-0.6	FALSE	FALSE	FALSE	FALSE	0.79	0.88	0.19	0.3	-0.082	0.00079	0.13	0.056	0.32
fat	III	FBgn0261274	Ero1L	38500	24.3	725.6	0.4	0.0037	0.55	0.049	-0.28	-0.45	FALSE	FALSE	FALSE	FALSE	0.4	0.57	0.72	0.8	0.12	0.55	1	0.5	0.73
fat	III	FBgn0035162	Sf3b3	38093	27.96	1584.98	0.3	0.0091	0.45	0.091	-0.23	-0.47	FALSE	FALSE	FALSE	FALSE	0.89	0.94	0.23	0.34	-0.27	0.17	0.69	0.021	0.24
fat	III	FBgn0037144	CG7458	40441	25.39	595.2	0.43	0.0036	0.57	0.049	-0.31	-0.67	FALSE	FALSE	FALSE	FALSE	0.26	0.43	0.024	0.057	-0.93	0.7	1	0.0045	0.12
fat	III	FBgn0036000	CG3434	39098	26.34	186.17	0.71	0.00032	0.8	0.0079	-0.067	-0.59	FALSE	FALSE	FALSE	FALSE	0.047	0.14	0.0033	0.012	-0.6	0.78	1	0.6	0.8
fat	III	FBgn0030234	CG15211	32006	26.99	75.92	0.46	0.006	0.61	0.07	-0.61	-0.81	FALSE	FALSE	FALSE	FALSE	0.57	0.72	0.13	0.22	-1.3	0.61	1	0.099	0.39
fat	III	FBgn0005632	faf	43749	28.49	4562.49	0.71	0.0025	0.8	0.038	-0.035	-0.44	FALSE	FALSE	FALSE	FALSE	0.18	0.34	0.13	0.22	0.15	0.12	0.6	0.38	0.65
fat	III	FBgn0025864	Crag	31800	25.97	1950.19	0.64	0.0066	0.76	0.074	-0.081	-0.34	FALSE	FALSE	FALSE	FALSE	0.6	0.74	0.24	0.35	-0.21	0.2	0.74	0.36	0.63
fat	III	FBgn0001332	PRAS40	44831	25.83	1020.89	0.9	0.0076	0.93	0.081	-0.055	-0.37	FALSE	FALSE	FALSE	FALSE	0.11	0.24	0.037	0.081	0.95	0.86	1	0.34	0.62
fat	IV	FBgn0036044	Zasp67	39148	23.51	82.94	0.23	1.3e-43	0.37	1.3e-39	-0.78	4.4	TRUE	FALSE	FALSE	FALSE	0.29	0.47	0.77	0.84	0.18	0.75	1	0.38	0.65
fat	IV	FBgn0037762	eloF	41211	27.41	8080.36	2.9e-11	3.6e-06	1.4e-08	0.00019	-2.4	1.1	TRUE	TRUE	FALSE	TRUE	7.6e-08	1.4e-05	0.044	0.094	-0.36	1	1	0.00073	0.041
fat	IV	FBgn0037788	CG3940	41238	26.95	930.64	1.3e-08	4.3e-05	1.1e-06	0.0016	-1.6	1	TRUE	FALSE	FALSE	FALSE	0.6	0.74	4.2e-08	1.8e-06	-1.5	0.17	0.7	0.0044	0.12
fat	IV	FBgn0036787	CG4306	40017	23.51	135.24	0.035	3.3e-13	0.094	9.9e-11	-1.6	2.1	TRUE	FALSE	FALSE	FALSE	0.0083	0.041	0.071	0.14	1.3	0.99	1	0.041	0.29
fat	IV	FBgn0029994	Ldsdh1	31726	33.2	3505.13	3.4e-08	0.00029	2.2e-06	0.0072	-0.73	0.89	TRUE	FALSE	FALSE	TRUE	0.031	0.1	1.3e-05	0.00015	-0.47	0.25	0.81	0.0032	0.098
fat	IV	FBgn0266064	GlyS	41823	34.56	4008.72	1.1e-06	9.8e-05	2.8e-05	0.0031	-0.46	0.91	TRUE	FALSE	FALSE	FALSE	0.022	0.081	0.0017	0.0068	-0.24	0.11	0.58	0.26	0.55
fat	IV	FBgn0033367	PPO2	35910	33.81	1270.26	7.2e-06	4.8e-05	0.00012	0.0018	-0.47	1.2	TRUE	FALSE	FALSE	FALSE	2e-05	0.00054	0.075	0.14	0.14	0.99	1	0.032	0.27
fat	IV	FBgn0261534	l(2)34Fc	34838	31.59	1376.16	1.2e-05	0.00022	0.00018	0.0058	-0.57	1.1	TRUE	FALSE	FALSE	FALSE	0.0055	0.031	0.14	0.23	-0.15	0.72	1	0.039	0.28
fat	IV	FBgn0038829	CG17271	42463	26.24	650.88	0.0013	1.8e-06	0.0074	0.0001	-1	0.82	TRUE	FALSE	FALSE	TRUE	0.62	0.76	0.00027	0.0016	-1.2	0.35	0.9	0.00016	0.012
fat	IV	FBgn0010482	l(2)01289	46017	32.57	1363.62	2.2e-05	0.00025	0.0003	0.0063	-0.45	0.97	TRUE	FALSE	TRUE	FALSE	0.76	0.86	5.6e-05	0.00046	-0.42	0.0071	0.19	0.28	0.57
fat	IV	FBgn0000115	Arl1	39745	25.69	570.06	1.6e-07	0.0083	6.6e-06	0.086	-3.3	0.4	TRUE	TRUE	FALSE	FALSE	1.3e-05	0.00039	0.9	0.93	0.049	1	1	0.42	0.67
fat	IV	FBgn0041629	Hexo2	31808	30.49	1464.86	1.1e-05	0.00072	0.00017	0.015	-0.58	0.91	TRUE	FALSE	TRUE	FALSE	0.37	0.55	0.00016	0.001	-0.46	0.062	0.46	0.053	0.31
fat	IV	FBgn0050008	CG30008	246388	28.07	23144.3	2.9e-07	0.0099	1e-05	0.097	-1.5	0.77	TRUE	TRUE	FALSE	FALSE	7.1e-06	0.00025	0.38	0.5	0.16	1	1	0.12	0.41
fat	IV	FBgn0029167	Hml	39529	28.51	8943.18	6.9e-05	0.00026	0.00071	0.0066	-0.72	0.91	TRUE	TRUE	FALSE	FALSE	9e-05	0.0016	0.065	0.13	0.27	1	1	0.0075	0.16
fat	IV	FBgn0034509	Obp57c	37311	25.99	1115.53	2.8e-06	0.0044	5.6e-05	0.056	-1	0.72	TRUE	FALSE	FALSE	FALSE	0.14	0.29	0.00024	0.0014	-0.68	0.47	0.98	0.018	0.23
fat	IV	FBgn0039801	Npc2h	43649	24.56	1778.85	0.00011	0.00031	0.0011	0.0076	-0.72	1.1	TRUE	TRUE	FALSE	FALSE	8.1e-06	0.00028	0.0012	0.0053	0.56	1	1	0.0054	0.13
fat	IV	FBgn0026207	mbo	41562	27.21	682.74	0.00022	0.0002	0.0018	0.0055	-0.45	0.57	TRUE	FALSE	FALSE	FALSE	0.12	0.26	0.031	0.071	-0.23	0.19	0.73	0.74	0.88
fat	IV	FBgn0032864	CG2493	35316	30.14	1630.07	1.8e-05	0.0023	0.00025	0.035	-0.69	0.64	TRUE	FALSE	FALSE	FALSE	0.01	0.047	0.094	0.17	-0.21	0.79	1	0.008	0.16
fat	IV	FBgn0036157	CG7560	39276	24.94	1244.31	0.026	8.9e-07	0.074	5.8e-05	-2	1.4	TRUE	FALSE	FALSE	FALSE	0.99	0.99	0.026	0.062	-2	0.39	0.94	0.03	0.26
fat	IV	FBgn0039486	caix	43264	29.85	426.43	8.6e-06	0.0086	0.00014	0.088	-0.74	0.73	TRUE	FALSE	FALSE	FALSE	0.061	0.16	0.0036	0.013	-0.4	0.5	1	0.056	0.32
fat	IV	FBgn0038446	CG14903	42014	26.5	69.11	1.1e-05	0.01	0.00018	0.099	-0.89	0.6	TRUE	FALSE	FALSE	FALSE	0.1	0.23	0.002	0.0077	-0.53	0.53	1	0.24	0.54
fat	IV	FBgn0001114	Glt	34193	33.84	4018.8	2.1e-05	0.0097	0.00029	0.096	-0.49	0.43	TRUE	FALSE	FALSE	TRUE	0.15	0.31	3.8e-07	1e-05	-0.68	0.1	0.56	1.5e-05	0.0018
fat	IV	FBgn0033949	CG10131	36624	24.99	183.77	0.00064	0.00068	0.0043	0.014	-0.58	1	TRUE	FALSE	FALSE	FALSE	0.0061	0.033	0.79	0.85	0.038	0.91	1	0.12	0.41
fat	IV	FBgn0023529	CG2918	31215	32.22	3047.94	0.0054	5.7e-05	0.023	0.002	-0.21	0.4	TRUE	FALSE	TRUE	FALSE	0.81	0.89	0.011	0.032	-0.19	0.0019	0.13	0.051	0.31
fat	IV	FBgn0004242	Syt1	33473	23.64	1736.81	0.048	1.3e-06	0.12	8.1e-05	-0.95	1.2	TRUE	FALSE	FALSE	TRUE	0.18	0.34	0.89	0.93	-0.06	0.8	1	0.00059	0.035
fat	IV	FBgn0034198	CG11400	36935	26.96	1987.91	0.0012	0.00076	0.0068	0.015	-0.57	0.82	TRUE	TRUE	FALSE	TRUE	2.4e-07	3e-05	5.9e-07	1.5e-05	1.1	1	1	0.0026	0.089
fat	IV	FBgn0039483	CG14259	43261	27.73	404.79	0.046	3.8e-06	0.11	0.0002	-0.33	1.1	TRUE	FALSE	FALSE	FALSE	0.27	0.45	0.0015	0.0063	-0.58	0.34	0.9	0.0075	0.16
fat	IV	FBgn0014411	Vps26	31144	28.34	587.59	0.00012	0.0076	0.0012	0.081	-0.45	0.38	TRUE	FALSE	FALSE	FALSE	0.00076	0.0075	0.41	0.52	0.077	0.91	1	0.023	0.25
fat	IV	FBgn0031037	CG14207	32955	26.85	2204.57	0.00012	0.0079	0.0011	0.083	-0.62	0.61	TRUE	FALSE	FALSE	FALSE	0.0069	0.036	0.56	0.66	-0.075	0.87	1	0.071	0.34
fat	IV	FBgn0039297	CG11852	43035	29.87	670.21	0.0002	0.006	0.0017	0.07	-0.49	0.86	TRUE	TRUE	FALSE	FALSE	3.2e-05	0.00079	0.0057	0.018	0.33	1	1	0.12	0.41
fat	IV	FBgn0039628	CG11841	43430	27.82	2348.72	0.00087	0.0018	0.0054	0.029	-0.66	0.94	TRUE	FALSE	FALSE	FALSE	0.32	0.5	0.02	0.051	-0.42	0.34	0.9	0.087	0.37
fat	IV	FBgn0036587	CG4950	39783	27.23	463.67	0.0018	0.00085	0.0098	0.017	-0.7	1	TRUE	FALSE	FALSE	FALSE	0.38	0.56	0.028	0.065	-0.46	0.36	0.91	0.014	0.2
fat	IV	FBgn0031417	CG3597	33420	32.05	4967.48	0.00052	0.0031	0.0036	0.043	-0.31	0.88	TRUE	FALSE	TRUE	TRUE	0.16	0.31	0.044	0.094	-0.16	0.044	0.39	0.0017	0.072
fat	IV	FBgn0035600	Cyt-c1	38612	32.71	4598.56	0.0016	0.0014	0.009	0.025	-0.52	0.64	TRUE	FALSE	FALSE	FALSE	0.00093	0.0085	0.074	0.14	0.26	0.98	1	0.036	0.27
fat	IV	FBgn0040102	lectin-24Db	53550	23.65	201.4	0.0075	0.0003	0.029	0.0074	-1.3	1	TRUE	FALSE	FALSE	TRUE	0.12	0.26	0.48	0.59	-0.31	0.85	1	0.0028	0.092
fat	IV	FBgn0039682	Obp99c	43494	31.55	17350.7	0.0011	0.0028	0.0065	0.04	-0.36	0.89	TRUE	TRUE	FALSE	FALSE	1.5e-07	2.2e-05	3e-07	8.7e-06	0.74	1	1	0.0069	0.15
fat	IV	FBgn0052190	NUCB1	39978	28.45	2072.15	0.047	1.8e-05	0.12	0.00075	-0.27	0.83	TRUE	FALSE	FALSE	TRUE	0.27	0.44	0.61	0.71	-0.065	0.22	0.77	0.0014	0.064
fat	IV	FBgn0263830	CG40486	3355162	27.14	677.83	0.00083	0.0048	0.0052	0.06	-0.67	0.85	TRUE	TRUE	FALSE	FALSE	0.00039	0.0046	0.046	0.097	0.36	1	1	0.052	0.31
fat	IV	FBgn0043578	PGRP-SB1	39870	27.96	733.57	0.0019	0.0027	0.01	0.039	-0.65	1.1	TRUE	FALSE	FALSE	FALSE	0.0094	0.044	0.64	0.73	0.086	0.93	1	0.071	0.34
fat	IV	FBgn0028325	Pdha	31406	34.28	4170.36	0.016	0.00021	0.052	0.0055	-0.15	0.62	TRUE	FALSE	TRUE	FALSE	0.13	0.27	0.00012	0.00082	-0.28	0.0081	0.2	0.0077	0.16
fat	IV	FBgn0037010	CG4825	40281	23.27	1007.73	0.037	5.1e-05	0.096	0.0018	-1	0.72	TRUE	FALSE	FALSE	FALSE	0.21	0.38	0.69	0.77	-0.18	0.77	1	0.055	0.31
fat	IV	FBgn0032889	CG9331	35347	34.05	2727.25	0.0093	0.001	0.034	0.02	-0.25	0.82	TRUE	FALSE	FALSE	TRUE	0.12	0.26	0.54	0.65	-0.055	0.13	0.63	0.0013	0.06
fat	IV	FBgn0053178	CG33178	318913	26.53	616.9	0.0078	0.0017	0.03	0.028	-0.44	0.87	TRUE	FALSE	FALSE	FALSE	0.04	0.12	0.89	0.92	0.021	0.72	1	0.044	0.29
fat	IV	FBgn0013681	mt:ND3	192475	27.76	2302.82	0.0036	0.0053	0.017	0.064	-0.43	0.85	TRUE	FALSE	FALSE	FALSE	0.0086	0.042	0.42	0.54	0.1	0.85	1	0.38	0.65
fat	IV	FBgn0037552	CG7800	40963	26.21	381.67	0.011	0.0018	0.039	0.029	-0.41	0.68	TRUE	FALSE	TRUE	FALSE	0.82	0.9	0.0055	0.018	-0.45	0.082	0.51	0.0056	0.13
fat	IV	FBgn0027095	Manf	41983	28.5	496.11	0.015	0.0013	0.05	0.023	-0.32	0.55	TRUE	FALSE	FALSE	FALSE	0.021	0.078	0.38	0.5	0.11	0.69	1	0.46	0.71
fat	IV	FBgn0039102	SPE	42791	29.03	3228.22	0.022	0.0011	0.066	0.02	-0.33	0.98	TRUE	FALSE	FALSE	FALSE	0.59	0.74	0.0043	0.014	-0.43	0.11	0.57	0.021	0.24
fat	IV	FBgn0015622	Cnx99A	44643	30.41	1316.3	0.0039	0.0082	0.018	0.085	-0.24	0.31	TRUE	FALSE	FALSE	FALSE	0.0004	0.0046	0.011	0.031	0.21	0.85	1	0.086	0.36
fat	IV	FBgn0260855	Sec22	31030	28.69	374.53	0.085	0.00014	0.18	0.0041	-0.18	0.55	TRUE	FALSE	FALSE	FALSE	0.00039	0.0045	0.0004	0.0022	0.42	0.96	1	0.0057	0.13
fat	IV	FBgn0004507	GlyP	33386	38.06	8689.43	0.0072	0.006	0.028	0.07	-0.19	0.46	TRUE	FALSE	TRUE	FALSE	0.026	0.092	4.8e-06	6.9e-05	-0.4	0.074	0.49	0.022	0.25
fat	IV	FBgn0036728	UQCR-Q	39950	32.91	1433.84	0.015	0.0031	0.05	0.044	-0.43	0.68	TRUE	FALSE	FALSE	FALSE	0.49	0.65	0.0018	0.0071	-0.59	0.22	0.76	0.007	0.15
fat	IV	FBgn0028527	CG18507	34775	24.73	422.14	0.036	0.0011	0.094	0.02	-0.93	0.65	TRUE	FALSE	FALSE	FALSE	0.034	0.11	0.34	0.46	0.4	0.95	1	0.08	0.35
fat	IV	FBgn0032076	CG9510	3771738	32.5	3637.45	0.048	0.00071	0.12	0.015	-0.17	0.92	TRUE	FALSE	FALSE	TRUE	0.073	0.18	0.57	0.67	0.046	0.14	0.64	0.0013	0.06
fat	IV	FBgn0038450	CG17560	42022	32.14	27879.6	0.021	0.0026	0.063	0.038	-0.18	0.84	TRUE	FALSE	TRUE	FALSE	0.82	0.9	0.011	0.03	-0.21	0.0032	0.15	0.27	0.56
fat	IV	FBgn0261341	verm	40149	24.88	189.93	0.024	0.003	0.07	0.042	-1.5	0.77	TRUE	FALSE	FALSE	FALSE	0.13	0.28	0.8	0.86	-0.15	0.87	1	0.028	0.26
fat	IV	FBgn0030605	ND-B18	32434	29.06	661.48	0.022	0.0038	0.065	0.051	-0.23	0.69	TRUE	FALSE	TRUE	FALSE	0.24	0.41	0.44	0.55	-0.071	0.082	0.51	0.039	0.28
fat	IV	FBgn0086355	Tpi	43582	35.06	5898.01	0.17	0.00011	0.29	0.0035	-0.089	0.65	TRUE	FALSE	FALSE	FALSE	2.3e-07	3e-05	1e-08	6.2e-07	0.61	1	1	0.0046	0.12
fat	IV	FBgn0032482	Pect	34716	30.74	5369.72	0.034	0.0025	0.091	0.037	-0.18	0.74	TRUE	FALSE	FALSE	FALSE	0.00023	0.0032	0.00055	0.0028	0.33	0.93	1	0.0077	0.16
fat	IV	FBgn0031066	COX6B	32989	32.6	2759.29	0.035	0.0025	0.093	0.037	-0.4	0.56	TRUE	FALSE	FALSE	TRUE	0.0053	0.03	0.04	0.087	0.39	0.96	1	0.0013	0.062
fat	IV	FBgn0010265	RpS13	34149	33.06	12917.7	0.012	0.0097	0.041	0.096	-0.41	0.51	TRUE	FALSE	FALSE	FALSE	0.38	0.55	0.00073	0.0035	-0.6	0.24	0.79	0.019	0.24
fat	IV	FBgn0036449	bmm	39611	29.15	3264.1	0.054	0.0015	0.13	0.026	-0.23	0.76	TRUE	FALSE	FALSE	FALSE	0.026	0.091	0.19	0.29	0.15	0.61	1	0.069	0.34
fat	IV	FBgn0031914	CG5973	34023	30.24	1760.17	0.018	0.0071	0.056	0.077	-0.25	0.47	TRUE	FALSE	TRUE	TRUE	0.99	0.99	0.018	0.046	-0.24	0.01	0.22	0.0028	0.092
fat	IV	FBgn0021856	l(2)k14505	35399	25.8	253.1	0.017	0.0092	0.054	0.093	-1.4	0.43	TRUE	FALSE	FALSE	FALSE	0.33	0.51	0.24	0.35	-0.62	0.7	1	0.42	0.67
fat	IV	FBgn0050296	RIC-3	37384	26.23	183.99	0.019	0.0085	0.059	0.088	-0.57	0.67	TRUE	FALSE	FALSE	FALSE	0.53	0.69	0.11	0.2	-0.37	0.33	0.89	0.054	0.31
fat	IV	FBgn0037433	CG17919	40780	31.22	491.81	0.035	0.0044	0.094	0.056	-0.22	0.81	TRUE	FALSE	FALSE	FALSE	0.00031	0.0039	0.0008	0.0038	0.38	0.96	1	0.12	0.41
fat	IV	FBgn0015791	Rab14	34840	28.77	476.1	0.042	0.0041	0.11	0.053	-0.15	0.49	TRUE	FALSE	FALSE	TRUE	0.15	0.3	0.97	0.98	-0.0025	0.036	0.36	6e-05	0.0064
fat	IV	FBgn0011760	ctp	31405	29.45	1613.68	0.036	0.0059	0.094	0.069	-0.3	0.81	TRUE	FALSE	FALSE	FALSE	0.13	0.28	0.96	0.97	-0.0069	0.41	0.95	0.052	0.31
fat	IV	FBgn0032494	CG5945	34729	31.8	3776.02	0.031	0.0082	0.084	0.085	-0.25	0.71	TRUE	FALSE	FALSE	FALSE	0.35	0.53	0.0017	0.0069	-0.4	0.11	0.57	0.059	0.32
fat	IV	FBgn0023129	aay	39085	28.72	6632.9	0.41	3.1e-05	0.56	0.0012	-0.11	0.91	TRUE	FALSE	FALSE	FALSE	0.00026	0.0035	2.9e-05	0.00028	0.75	0.99	1	0.0052	0.13
fat	IV	FBgn0259740	CG42394	7354424	25.17	117.4	0.036	0.0083	0.094	0.086	-0.35	0.85	TRUE	FALSE	FALSE	FALSE	0.0016	0.013	0.008	0.024	0.46	0.98	1	0.036	0.27
fat	IV	FBgn0030518	CG11134	32334	30.45	1261.39	0.084	0.0029	0.18	0.042	-0.17	0.66	TRUE	FALSE	FALSE	FALSE	1.3e-05	0.0004	3.8e-06	5.7e-05	0.62	1	1	0.023	0.25
fat	IV	FBgn0025885	Inos	35671	31.88	3673.34	0.067	0.0052	0.15	0.064	-0.14	0.64	TRUE	FALSE	FALSE	FALSE	0.051	0.15	0.32	0.44	0.074	0.12	0.61	0.085	0.36
fat	IV	FBgn0266579	tau	326116	26	153.09	0.43	7.2e-05	0.58	0.0025	-0.28	0.91	TRUE	FALSE	FALSE	TRUE	0.056	0.15	0.051	0.11	0.71	0.9	1	0.0018	0.075
fat	IV	FBgn0035588	CG10672	38598	32.09	2071.28	0.086	0.0054	0.18	0.065	-0.2	0.63	TRUE	FALSE	FALSE	FALSE	0.0021	0.016	0.0044	0.015	0.36	0.91	1	0.13	0.43
fat	IV	FBgn0051313	CG31313	318677	31.31	6236.65	0.15	0.0026	0.28	0.038	-0.2	0.83	TRUE	FALSE	FALSE	FALSE	0.65	0.78	0.41	0.52	-0.12	0.1	0.57	0.026	0.26
fat	IV	FBgn0035589	CHMP2B	38599	24.92	476.16	0.12	0.0041	0.23	0.054	-0.84	0.58	TRUE	FALSE	FALSE	FALSE	0.051	0.15	0.2	0.3	0.69	0.94	1	0.21	0.51
fat	IV	FBgn0040813	Nplp2	50286	35.02	39429.6	0.23	0.0012	0.37	0.022	-0.14	0.82	TRUE	FALSE	FALSE	TRUE	2.1e-06	0.00011	1.2e-07	4.2e-06	0.94	1	1	0.00064	0.038
fat	IV	FBgn0033518	Prx2540-2	36098	33.56	744.53	0.16	0.0028	0.29	0.04	-0.12	0.67	TRUE	FALSE	FALSE	TRUE	2e-08	6.1e-06	5.4e-10	6.6e-08	0.99	1	1	0.00082	0.045
fat	IV	FBgn0000409	Cyt-c-p	34996	33.03	3431.45	0.46	0.00015	0.61	0.0044	-0.063	0.75	TRUE	FALSE	FALSE	FALSE	0.41	0.58	0.066	0.13	-0.16	0.029	0.32	0.0091	0.17
fat	IV	FBgn0039226	Ude	42953	28.63	395.83	0.29	0.00091	0.44	0.018	-0.13	0.91	TRUE	FALSE	FALSE	FALSE	0.19	0.35	0.41	0.52	0.1	0.27	0.83	0.36	0.63
fat	IV	FBgn0020764	Alas	37815	25.86	5524.34	0.13	0.0062	0.25	0.071	-0.23	0.75	TRUE	FALSE	FALSE	FALSE	0.0011	0.0094	0.00099	0.0045	0.58	0.98	1	0.32	0.61
fat	IV	FBgn0032218	CG5381	34389	28.95	869.07	0.28	0.0012	0.44	0.022	-0.1	0.76	TRUE	FALSE	FALSE	TRUE	0.0027	0.019	0.0013	0.0056	0.36	0.81	1	0.00014	0.011
fat	IV	FBgn0036550	CG17026	39739	27.8	109.4	0.36	0.0007	0.51	0.015	-0.12	0.9	TRUE	FALSE	FALSE	FALSE	0.38	0.56	0.75	0.82	0.043	0.18	0.71	0.076	0.35
fat	IV	FBgn0010053	Jheh1	251984	32.24	4716.43	0.17	0.005	0.3	0.062	-0.11	0.77	TRUE	FALSE	FALSE	FALSE	7.2e-08	1.4e-05	2.5e-09	2.1e-07	0.85	1	1	0.14	0.44
fat	IV	FBgn0000477	DNaseII	48228	28.46	2417.41	0.12	0.0096	0.23	0.095	-0.3	0.72	TRUE	FALSE	FALSE	FALSE	0.36	0.54	0.76	0.83	-0.056	0.36	0.91	0.014	0.2
fat	IV	FBgn0040091	Ugt58Fa	37590	26.12	257.68	0.2	0.004	0.34	0.053	-0.31	0.77	TRUE	FALSE	FALSE	FALSE	0.18	0.34	0.0039	0.013	-0.76	0.64	1	0.021	0.24
fat	IV	FBgn0024289	Sodh-1	40836	33.09	3536.35	0.66	4.8e-05	0.77	0.0018	-0.066	1.2	TRUE	FALSE	FALSE	TRUE	0.12	0.26	0.014	0.037	-0.41	0.5	1	0.0014	0.065
fat	IV	FBgn0000579	Eno	33351	36.5	15541.5	0.26	0.0024	0.41	0.036	-0.066	0.58	TRUE	FALSE	FALSE	FALSE	0.0007	0.0071	0.00021	0.0013	0.27	0.46	0.98	0.018	0.23
fat	IV	FBgn0031558	CG16704	33589	23.3	420.54	0.32	0.0016	0.47	0.028	-0.77	0.9	TRUE	FALSE	FALSE	FALSE	0.74	0.85	0.59	0.69	-0.41	0.51	1	0.0039	0.11
fat	IV	FBgn0030164	CG1889	31928	27.27	339.98	0.23	0.0051	0.37	0.062	-0.18	0.76	TRUE	FALSE	FALSE	FALSE	0.018	0.071	0.026	0.062	0.34	0.81	1	0.092	0.37
fat	IV	FBgn0015035	Cyp4e3	34291	26.66	1355.04	0.21	0.0069	0.35	0.076	-0.26	0.66	TRUE	FALSE	FALSE	FALSE	0.73	0.84	0.43	0.54	-0.16	0.2	0.74	0.12	0.41
fat	IV	FBgn0051205	CG31205	318626	27.3	298.24	0.23	0.0067	0.37	0.074	-0.14	0.76	TRUE	FALSE	FALSE	FALSE	0.43	0.61	0.028	0.065	-0.26	0.092	0.54	0.19	0.48
fat	IV	FBgn0032229	CG5045	34402	30.48	409.86	0.41	0.0015	0.56	0.025	-0.15	0.49	TRUE	FALSE	FALSE	TRUE	0.38	0.56	0.05	0.1	-0.39	0.34	0.9	0.0015	0.066
fat	IV	FBgn0024841	Pcd	43499	31.98	662.78	0.21	0.0095	0.35	0.094	-0.23	0.43	TRUE	FALSE	FALSE	FALSE	0.001	0.0092	0.00051	0.0027	0.75	0.99	1	0.035	0.27
fat	IV	FBgn0030292	CG11752	32076	31.2	319.88	0.48	0.00099	0.62	0.019	-0.077	0.64	TRUE	FALSE	FALSE	FALSE	0.0028	0.019	0.00056	0.0029	0.45	0.88	1	0.0043	0.11
fat	IV	FBgn0037548	CG7900	40957	29.25	5710.3	0.29	0.0053	0.44	0.064	-0.15	0.77	TRUE	FALSE	FALSE	FALSE	0.078	0.19	0.0016	0.0065	-0.5	0.53	1	0.17	0.46
fat	IV	FBgn0035321	CG1275	38286	28.76	915.2	0.26	0.0082	0.41	0.086	-0.21	0.43	TRUE	FALSE	FALSE	FALSE	4.2e-05	0.00095	4.8e-06	6.8e-05	1.1	1	1	0.6	0.8
fat	IV	FBgn0033521	CG12896	36101	24.37	885.5	0.61	0.00056	0.74	0.012	-0.36	0.69	TRUE	FALSE	FALSE	TRUE	0.3	0.48	0.34	0.46	0.68	0.76	1	3.1e-05	0.0035
fat	IV	FBgn0001218	Hsc70-3	32133	34.51	8326.67	0.43	0.0027	0.57	0.039	-0.049	0.28	TRUE	FALSE	FALSE	FALSE	0.0056	0.031	0.0019	0.0075	0.22	0.21	0.75	0.54	0.76
fat	IV	FBgn0032015	Ostgamma	34137	28.17	778.69	0.3	0.0087	0.45	0.089	-0.18	0.39	TRUE	FALSE	FALSE	FALSE	0.79	0.88	0.16	0.26	-0.24	0.12	0.61	0.36	0.63
fat	IV	FBgn0041337	Cyp309a2	33439	24.2	364.3	0.31	0.0081	0.46	0.085	-0.52	0.7	TRUE	FALSE	FALSE	FALSE	0.062	0.16	0.093	0.17	0.88	0.93	1	0.7	0.86
fat	IV	FBgn0263852	Dad1	34159	28.12	212.96	0.31	0.0083	0.47	0.086	-0.15	0.45	TRUE	FALSE	FALSE	FALSE	0.014	0.058	0.011	0.032	0.42	0.86	1	0.42	0.68
fat	IV	FBgn0031821	KFase	33907	27.15	282.22	0.76	0.00017	0.84	0.0047	-0.12	0.99	TRUE	FALSE	FALSE	FALSE	0.46	0.63	0.45	0.56	0.3	0.56	1	0.035	0.27
fat	IV	FBgn0038179	CG9312	41686	24.57	388.58	0.35	0.007	0.5	0.077	-0.57	0.77	TRUE	FALSE	FALSE	FALSE	0.79	0.88	0.56	0.66	-0.35	0.44	0.97	0.078	0.35
fat	IV	FBgn0030060	CG2004	31809	33	1923.95	0.43	0.0044	0.57	0.056	-0.084	0.68	TRUE	FALSE	FALSE	FALSE	0.38	0.56	0.66	0.74	0.047	0.083	0.51	0.14	0.43
fat	IV	FBgn0030362	regucalcin	32165	34.93	5065.52	0.46	0.0033	0.61	0.046	-0.059	0.83	TRUE	FALSE	FALSE	FALSE	4.2e-05	0.00094	2.1e-06	3.9e-05	0.55	0.99	1	0.065	0.33
fat	IV	FBgn0026879	CG13364	50364	28.02	869.47	0.75	0.00033	0.83	0.008	-0.047	0.55	TRUE	FALSE	FALSE	FALSE	0.035	0.11	0.0023	0.0088	-0.51	0.73	1	0.02	0.24
fat	IV	FBgn0031360	CG31937	326177	27.47	4822.72	0.5	0.0045	0.64	0.057	-0.18	0.77	TRUE	FALSE	FALSE	FALSE	0.86	0.91	0.36	0.48	-0.25	0.23	0.78	0.064	0.33
fat	IV	FBgn0031670	SelT	33725	28.58	848.14	0.58	0.0026	0.71	0.038	-0.11	0.32	TRUE	FALSE	FALSE	FALSE	0.076	0.19	0.0048	0.016	-0.63	0.74	1	0.063	0.33
fat	IV	FBgn0032586	Tpr2	34984	27.68	2359.93	0.48	0.0065	0.63	0.073	-0.11	0.46	TRUE	FALSE	FALSE	FALSE	0.33	0.51	0.047	0.099	-0.32	0.28	0.84	0.034	0.27
fat	IV	FBgn0031489	CG17224	33510	29.61	2011.95	0.46	0.0077	0.61	0.082	-0.11	0.83	TRUE	FALSE	FALSE	FALSE	0.051	0.15	0.04	0.088	0.32	0.66	1	0.026	0.26
fat	IV	FBgn0038198	Npc2b	41710	29	1715.28	0.49	0.0064	0.64	0.073	-0.15	0.8	TRUE	FALSE	FALSE	FALSE	0.005	0.029	0.0012	0.0054	0.83	0.97	1	0.058	0.32
fat	IV	FBgn0015031	cype	46040	32.91	1596.85	0.54	0.0049	0.68	0.061	-0.1	0.59	TRUE	FALSE	FALSE	FALSE	0.22	0.39	0.026	0.062	-0.4	0.43	0.96	0.0064	0.14
fat	IV	FBgn0032198	eEF1delta	34363	32.88	3285.03	0.55	0.0046	0.69	0.058	-0.054	0.52	TRUE	FALSE	FALSE	FALSE	0.38	0.56	0.077	0.15	-0.17	0.045	0.39	0.031	0.27
fat	IV	FBgn0029868	ND-B16.6	31578	31.76	868.14	0.65	0.0021	0.77	0.033	-0.045	0.74	TRUE	FALSE	FALSE	FALSE	0.75	0.85	1	1	0.00042	0.023	0.3	0.022	0.25
fat	IV	FBgn0035422	RpL28	38397	33.73	5504.74	0.48	0.0086	0.63	0.088	-0.081	0.55	TRUE	FALSE	FALSE	FALSE	0.0044	0.026	4.9e-05	0.00041	-0.6	0.86	1	0.015	0.21
fat	IV	FBgn0036433	CG9628	39593	24.02	717.93	0.53	0.0087	0.67	0.089	-0.2	0.58	TRUE	FALSE	FALSE	FALSE	0.033	0.11	0.017	0.044	0.82	0.93	1	0.1	0.39
fat	IV	FBgn0036135	mRpL2	39253	27.22	394.81	0.66	0.0036	0.77	0.048	-0.06	0.59	TRUE	FALSE	FALSE	FALSE	0.18	0.34	0.026	0.061	-0.33	0.35	0.9	0.58	0.79
fat	IV	FBgn0003141	pr	35292	28.69	284	0.68	0.0038	0.78	0.051	-0.043	0.7	TRUE	FALSE	FALSE	TRUE	0.6	0.75	0.75	0.82	0.032	0.038	0.36	0.0033	0.099
fat	IV	FBgn0002789	Mp20	36468	34.95	2832.93	0.91	0.0002	0.94	0.0055	-0.01	0.87	TRUE	FALSE	FALSE	FALSE	0.67	0.8	0.63	0.72	0.043	0.016	0.26	0.031	0.27
fat	IV	FBgn0004117	Tm2	41853	27.23	2823.02	0.7	0.0037	0.8	0.049	-0.12	0.58	TRUE	FALSE	FALSE	FALSE	0.22	0.39	0.18	0.28	0.44	0.69	1	0.013	0.2
fat	IV	FBgn0033079	Fmo-2	35561	30.25	1576.69	0.81	0.0018	0.88	0.029	-0.021	0.64	TRUE	FALSE	FALSE	FALSE	0.00083	0.0079	3.9e-05	0.00035	0.46	0.87	1	0.01	0.18
fat	IV	FBgn0038662	Mpc1	42268	28.94	1097.83	0.91	0.00072	0.94	0.015	-0.024	0.73	TRUE	FALSE	FALSE	TRUE	0.041	0.13	0.0047	0.016	-0.65	0.84	1	0.0011	0.056
fat	IV	FBgn0035444	CG12012	38422	24.39	444.71	0.72	0.0081	0.81	0.085	-0.21	0.54	TRUE	FALSE	FALSE	FALSE	0.097	0.22	0.049	0.1	1.2	0.9	1	0.03	0.26
fat	IV	FBgn0034645	ND-B12	37466	30.32	1380.71	0.83	0.0044	0.89	0.056	-0.019	0.74	TRUE	FALSE	FALSE	FALSE	0.016	0.065	0.0009	0.0041	-0.33	0.42	0.95	0.01	0.18
fat	IV	FBgn0030519	CG11151	32335	32.12	5911.95	0.92	0.0022	0.94	0.034	-0.01	0.79	TRUE	FALSE	FALSE	FALSE	0.53	0.69	0.44	0.55	0.075	0.036	0.36	0.052	0.31
fat	IV	FBgn0033723	CG13155	36346	31.82	2376.69	0.85	0.0066	0.91	0.074	-0.028	0.74	TRUE	FALSE	FALSE	FALSE	1	1	0.85	0.9	-0.029	0.063	0.46	0.034	0.27
fat	IV	FBgn0013272	Gp150	37549	27.99	19275.9	0.95	0.0019	0.97	0.03	-0.0065	0.5	TRUE	FALSE	FALSE	FALSE	0.24	0.41	0.11	0.2	0.18	0.17	0.69	0.0085	0.17
fat	IV	FBgn0030304	Cyp4g15	32093	24.54	809.77	0.9	0.0084	0.93	0.086	-0.064	0.77	TRUE	FALSE	FALSE	FALSE	0.23	0.41	0.12	0.21	0.78	0.76	1	0.04	0.28
fat	IV	FBgn0250906	Pgk	33461	35.31	3436.02	0.96	0.0066	0.98	0.074	-0.0025	0.58	TRUE	FALSE	FALSE	FALSE	2.1e-06	0.00011	1.7e-08	9e-07	0.55	0.99	1	0.025	0.25
fat	IV	FBgn0037842	CG6567	41304	29.13	403.31	0.99	0.0027	0.99	0.039	-0.0018	0.54	TRUE	FALSE	FALSE	FALSE	0.00058	0.0061	1.4e-05	0.00015	-0.59	0.95	1	0.079	0.35
gut	I	FBgn0032066	LManIII	34203	31.12	6729.44	2.8e-15	3.1e-11	1.1e-11	9.8e-09	3.8	1.8	FALSE	TRUE	FALSE	FALSE	2.1e-07	5.3e-05	8.6e-11	1.8e-08	2	1	1	0.69	1
gut	I	FBgn0032068	LManV	34205	35.91	27577.7	9.8e-15	2.3e-10	2e-11	5.8e-08	2.7	1.6	FALSE	TRUE	FALSE	FALSE	1.3e-06	0.00017	1.3e-10	2.2e-08	1.5	1	1	0.76	1
gut	I	FBgn0032069	LManVI	34206	36.15	45950.9	9.5e-14	1.3e-10	1.3e-10	3.6e-08	2.5	1.6	FALSE	TRUE	FALSE	FALSE	5.6e-06	0.00043	1.4e-09	1e-07	1.4	1	1	0.57	1
gut	I	FBgn0003996	w	31271	25.56	3918.56	6.1e-11	1.1e-71	2.3e-08	1e-67	6.2	4.6	FALSE	FALSE	FALSE	FALSE	0.4	0.59	2.7e-10	3e-08	5.7	0.62	1	0.0032	0.37
gut	I	FBgn0034335	GstE1	37106	30.03	1808.13	9.2e-10	2.9e-11	1.6e-07	9.7e-09	1.6	1.6	FALSE	FALSE	FALSE	FALSE	0.00074	0.0095	1.3e-05	0.00012	0.8	0.98	1	0.0022	0.33
gut	I	FBgn0050360	Mal-A6	246565	34.82	123887	1.1e-08	4.4e-10	8.6e-07	1e-07	0.94	0.85	FALSE	TRUE	FALSE	FALSE	9.8e-06	0.00064	0.19	0.29	0.13	1	1	0.00068	0.21
gut	I	FBgn0037386	CG1208	40727	24.97	1554	4.8e-07	2.2e-21	1.3e-05	2.1e-18	3.9	1.9	FALSE	FALSE	FALSE	FALSE	0.36	0.56	5.8e-06	6e-05	3.2	0.67	1	0.0034	0.37
gut	I	FBgn0032067	LManIV	34204	32.2	327.39	1.1e-06	4.3e-11	2.5e-05	1.3e-08	2.9	1.8	FALSE	FALSE	FALSE	FALSE	0.11	0.28	0.00012	0.00071	2	0.85	1	0.99	1
gut	I	FBgn0051075	CG31075	43244	30.7	713.93	1.8e-09	8.7e-08	2.3e-07	1.2e-05	1.1	0.98	FALSE	FALSE	FALSE	FALSE	0.06	0.18	1.4e-07	3.3e-06	0.79	0.29	0.95	0.26	1
gut	I	FBgn0033296	Mal-A7	35829	33.11	20738.4	2.6e-09	1.5e-07	2.7e-07	1.9e-05	1.3	1	FALSE	FALSE	FALSE	FALSE	0.0039	0.029	7.3e-06	7.2e-05	0.75	0.9	1	0.0098	0.53
gut	I	FBgn0028516	ZnT35C	34890	27.8	1691.42	4e-10	3.8e-06	8.1e-08	0.0003	2.1	0.63	FALSE	FALSE	FALSE	FALSE	0.031	0.12	4.9e-08	1.4e-06	1.5	0.82	1	0.64	1
gut	I	FBgn0041629	Hexo2	31808	27.42	108.03	0.00015	5.4e-12	0.0011	2.1e-09	0.67	1.1	FALSE	FALSE	FALSE	FALSE	0.0036	0.027	0.96	0.98	0.0064	0.94	1	0.061	1
gut	I	FBgn0002571	Mal-A3	35826	31	8736.02	1.1e-08	1.4e-06	8.6e-07	0.00013	1.1	1.1	FALSE	TRUE	FALSE	FALSE	3.1e-05	0.0014	0.047	0.093	0.24	1	1	0.25	1
gut	I	FBgn0263199	Galk	39031	30.86	2344.68	8.3e-08	6.9e-07	3.9e-06	7e-05	0.76	0.77	FALSE	FALSE	TRUE	FALSE	0.42	0.61	6.3e-07	1e-05	0.66	0.034	0.49	0.46	1
gut	I	FBgn0000181	bic	45827	34.5	6381.66	3.6e-06	1.3e-07	6.3e-05	1.7e-05	0.75	0.36	FALSE	FALSE	FALSE	TRUE	0.12	0.28	0.00046	0.0021	0.49	0.32	0.97	0.00011	0.086
gut	I	FBgn0002570	Mal-A1	35824	35.68	169192	3.7e-07	1.7e-06	1.1e-05	0.00015	0.71	0.79	FALSE	FALSE	FALSE	FALSE	7.9e-05	0.0022	0.54	0.65	0.057	0.99	1	0.001	0.25
gut	I	FBgn0000079	Amy-p	47764	31.8	114107	0.00039	4.1e-10	0.0024	9.7e-08	0.54	0.87	FALSE	FALSE	FALSE	FALSE	0.071	0.2	0.12	0.2	0.2	0.49	1	0.011	0.55
gut	I	FBgn0063494	GstE6	37111	30.67	3280.7	3.9e-10	0.00048	8.1e-08	0.015	1	0.73	FALSE	TRUE	FALSE	FALSE	1.8e-07	5e-05	0.48	0.6	0.06	1	1	0.041	0.88
gut	I	FBgn0036824	CG3902	40059	34.88	3858.75	3.2e-08	5.3e-05	1.9e-06	0.0026	0.6	0.61	FALSE	FALSE	FALSE	FALSE	2e-05	0.001	0.26	0.37	0.075	0.97	1	0.59	1
gut	I	FBgn0261575	tobi	43072	34.64	61633.2	1.6e-06	6.1e-06	3.4e-05	0.00045	0.87	0.89	FALSE	FALSE	FALSE	FALSE	0.21	0.4	6.5e-05	0.00042	0.64	0.26	0.92	0.00035	0.15
gut	I	FBgn0027657	glob1	41930	32.49	1222.68	1.5e-09	0.0015	2.2e-07	0.037	1.1	0.51	FALSE	FALSE	TRUE	FALSE	0.38	0.58	9.2e-09	3.5e-07	0.97	0.064	0.61	0.91	1
gut	I	FBgn0033367	PPO2	35910	27.71	99.97	8.1e-06	3.2e-06	0.00012	0.00026	0.82	1.3	FALSE	FALSE	FALSE	FALSE	0.15	0.34	1.6e-07	3.6e-06	1.1	0.37	1	0.65	1
gut	I	FBgn0035901	CG6745	38969	28.02	182.72	1.2e-05	4.5e-06	0.00016	0.00035	1.7	1.1	FALSE	FALSE	FALSE	FALSE	0.0087	0.051	0.086	0.15	0.53	0.98	1	0.083	1
gut	I	FBgn0029155	Men-b	43936	31	2458.02	2.3e-07	0.00024	7.7e-06	0.0086	0.72	0.85	FALSE	FALSE	TRUE	FALSE	0.75	0.86	5e-07	8.6e-06	0.68	0.014	0.39	0.12	1
gut	I	FBgn0001248	Idh	44291	35.49	26353.9	4.7e-09	0.0028	4.4e-07	0.059	0.74	0.66	FALSE	TRUE	FALSE	FALSE	4.6e-06	0.00037	0.19	0.29	0.096	1	1	0.3	1
gut	I	FBgn0030593	CG9512	32419	32.8	11615	1e-05	1.1e-05	0.00014	0.00072	0.69	0.71	FALSE	FALSE	FALSE	FALSE	0.3	0.5	0.00025	0.0013	0.52	0.15	0.79	0.48	1
gut	I	FBgn0037146	CG7470	40443	36.06	22028.6	2.1e-09	0.0053	2.4e-07	0.093	0.82	0.29	FALSE	FALSE	FALSE	FALSE	9.9e-05	0.0026	0.00079	0.0033	0.3	0.95	1	0.21	1
gut	I	FBgn0010226	GstS1	36927	29.82	568.56	1.2e-07	0.00062	5e-06	0.018	0.93	0.54	FALSE	FALSE	FALSE	FALSE	0.052	0.17	3.1e-05	0.00023	0.6	0.45	1	0.56	1
gut	I	FBgn0260746	Ect3	41457	28.35	74.26	9.4e-05	2e-06	0.00078	0.00018	0.92	1	FALSE	FALSE	FALSE	FALSE	0.51	0.69	0.00076	0.0032	0.75	0.27	0.93	0.002	0.33
gut	I	FBgn0037973	CG18547	41452	32.19	4073.98	8.6e-05	9.6e-06	0.00073	0.00063	0.7	0.86	FALSE	FALSE	FALSE	FALSE	0.62	0.78	0.0004	0.0019	0.61	0.12	0.73	0.032	0.84
gut	I	FBgn0000556	eEF1alpha1	36271	36.7	122439	1.2e-06	0.00062	2.7e-05	0.018	0.46	0.4	FALSE	FALSE	TRUE	FALSE	0.24	0.44	3.6e-05	0.00026	0.35	0.011	0.39	0.88	1
gut	I	FBgn0037354	CG12171	40690	33.22	2704.12	2.3e-05	5.7e-05	0.00025	0.0028	0.59	0.45	FALSE	FALSE	FALSE	FALSE	0.0031	0.025	0.4	0.52	0.089	0.86	1	0.0082	0.51
gut	I	FBgn0035661	CG10477	38679	26.1	11662	3.9e-06	0.00028	6.7e-05	0.0096	1.5	0.56	FALSE	FALSE	FALSE	FALSE	0.14	0.32	0.00035	0.0017	0.99	0.67	1	0.046	0.92
gut	I	FBgn0001089	Gal	33839	32.48	8328.84	4.1e-08	0.0055	2.4e-06	0.096	1	0.43	FALSE	FALSE	FALSE	FALSE	0.012	0.064	6.5e-05	0.00042	0.58	0.73	1	0.3	1
gut	I	FBgn0016075	vkg	33726	33.37	363.67	1.6e-07	0.0027	6e-06	0.057	0.61	0.77	FALSE	FALSE	TRUE	FALSE	0.38	0.57	2e-08	6.5e-07	0.7	0.014	0.39	0.85	1
gut	I	FBgn0035679	CG10467	38697	32.23	3203.57	2e-06	0.00052	4.1e-05	0.016	0.67	0.52	FALSE	FALSE	TRUE	FALSE	0.27	0.47	5e-05	0.00034	0.52	0.098	0.69	0.063	1
gut	I	FBgn0033879	CG6543	36536	34.8	1875.39	6.7e-06	0.0002	0.0001	0.0076	0.49	0.46	FALSE	FALSE	TRUE	FALSE	0.61	0.77	1.6e-06	2.2e-05	0.54	0.0092	0.39	0.12	1
gut	I	FBgn0034354	GstE11	37128	28.68	184.03	1.2e-05	0.00012	0.00015	0.0051	0.94	0.86	FALSE	FALSE	FALSE	FALSE	0.0041	0.03	0.19	0.29	0.21	0.95	1	0.13	1
gut	I	FBgn0035473	mge	38459	28.38	591.91	2.5e-07	0.0028	8.3e-06	0.058	1	0.39	FALSE	FALSE	TRUE	FALSE	0.75	0.86	1.1e-07	2.7e-06	1.1	0.063	0.6	0.016	0.62
gut	I	FBgn0017558	Pdk	35970	28.74	963.23	2.6e-07	0.0042	8.4e-06	0.079	0.74	0.5	FALSE	FALSE	TRUE	FALSE	0.28	0.48	4.8e-06	5.1e-05	0.59	0.075	0.63	0.16	1
gut	I	FBgn0030484	GstT4	32299	32.25	7431.13	0.00066	6.1e-06	0.0035	0.00045	0.32	0.79	FALSE	FALSE	TRUE	FALSE	0.13	0.31	0.076	0.14	0.15	0.074	0.63	0.54	1
gut	I	FBgn0026602	Ady43A	44750	25.21	791.35	0.0071	1.8e-07	0.023	2.2e-05	1.3	0.98	FALSE	FALSE	FALSE	FALSE	0.059	0.18	0.85	0.9	0.08	0.92	1	0.035	0.85
gut	I	FBgn0038771	CG4390	42396	29.08	1029.02	0.013	9.3e-08	0.036	1.3e-05	0.54	0.71	FALSE	FALSE	FALSE	FALSE	0.025	0.1	0.51	0.62	-0.13	0.88	1	0.011	0.57
gut	I	FBgn0037974	CG12224	41453	27.11	500.08	0.00036	2.5e-05	0.0022	0.0014	1.2	1	FALSE	FALSE	FALSE	FALSE	0.0016	0.015	0.39	0.5	-0.24	0.99	1	0.0014	0.29
gut	I	FBgn0003517	sta	31106	35.53	35243.7	0.0025	7.7e-06	0.01	0.00053	0.45	0.47	FALSE	FALSE	TRUE	FALSE	0.65	0.8	0.00061	0.0027	0.54	0.088	0.66	0.036	0.86
gut	I	FBgn0000299	Col4a1	33727	32.81	419.12	1.5e-05	0.0043	0.00018	0.08	0.46	0.73	FALSE	FALSE	FALSE	FALSE	0.021	0.093	2.4e-08	7.5e-07	0.73	0.28	0.94	0.22	1
gut	I	FBgn0029176	eEF1gamma	44791	33.92	17926.1	0.0012	8.6e-05	0.0055	0.0039	0.3	0.43	FALSE	FALSE	TRUE	FALSE	0.35	0.55	6.3e-05	0.00041	0.4	0.021	0.43	0.12	1
gut	I	FBgn0052495	Gss2	318053	32.93	9107.13	1.1e-05	0.0054	0.00015	0.095	0.4	0.41	FALSE	FALSE	FALSE	FALSE	3.8e-05	0.0015	0.11	0.19	-0.11	0.96	1	0.77	1
gut	I	FBgn0027945	ppl	40349	27.97	180.62	0.00048	0.00026	0.0028	0.009	0.62	0.55	FALSE	FALSE	FALSE	FALSE	0.18	0.37	0.034	0.073	0.34	0.4	1	0.05	0.95
gut	I	FBgn0025687	LKRSDH	34064	29.23	736.73	0.00036	0.00044	0.0022	0.014	0.59	0.42	FALSE	FALSE	FALSE	FALSE	0.43	0.62	3.1e-05	0.00023	0.75	0.17	0.81	0.2	1
gut	I	FBgn0003076	Pgm	44010	32.68	7482.34	8.4e-05	0.0019	0.00072	0.043	0.41	0.42	FALSE	FALSE	TRUE	FALSE	0.33	0.53	0.0018	0.0066	0.3	0.032	0.48	0.2	1
gut	I	FBgn0036321	CG14120	39463	29.49	10416.6	5.6e-05	0.0032	0.00053	0.065	0.84	0.5	FALSE	TRUE	FALSE	FALSE	0.00027	0.0049	0.26	0.38	-0.19	1	1	0.25	1
gut	I	FBgn0037817	Cyp12e1	41272	27.95	247.66	6.2e-05	0.0043	0.00057	0.08	0.79	0.49	FALSE	FALSE	FALSE	FALSE	0.31	0.5	0.0016	0.0058	0.57	0.3	0.95	0.32	1
gut	I	FBgn0086904	Nacalpha	36409	32.52	7934.97	0.024	3.9e-06	0.062	0.00031	0.28	0.47	FALSE	FALSE	FALSE	FALSE	0.22	0.42	0.00051	0.0023	0.48	0.19	0.85	0.0037	0.37
gut	I	FBgn0039857	RpL6	43723	34.46	21230.9	0.0016	0.00033	0.0072	0.011	0.36	0.39	FALSE	FALSE	FALSE	FALSE	0.0014	0.014	0.12	0.2	-0.16	0.89	1	0.3	1
gut	I	FBgn0039774	CDase	43618	29.91	3176.48	9.2e-05	0.0059	0.00077	0.1	0.86	0.61	FALSE	FALSE	FALSE	FALSE	0.0023	0.02	1	1	0.00096	0.98	1	0.46	1
gut	I	FBgn0034390	CG15093	37166	34.54	2787.48	0.00038	0.0022	0.0023	0.05	0.34	0.58	FALSE	FALSE	FALSE	FALSE	0.002	0.018	0.46	0.58	-0.059	0.71	1	0.7	1
gut	I	FBgn0034117	CG7997	36829	29.43	168.47	0.0016	0.00065	0.0072	0.019	0.39	0.72	FALSE	FALSE	TRUE	FALSE	0.56	0.73	0.01	0.027	0.3	0.056	0.59	0.35	1
gut	I	FBgn0038658	CG14292	42264	28.36	2729.24	0.0036	0.00038	0.013	0.013	0.65	0.63	FALSE	FALSE	FALSE	FALSE	0.66	0.8	0.014	0.035	0.53	0.22	0.87	0.76	1
gut	I	FBgn0034247	CG6484	36994	29.02	21871.1	0.082	2.5e-06	0.16	0.00021	0.38	0.64	FALSE	FALSE	FALSE	FALSE	0.18	0.36	0.0012	0.0048	0.79	0.59	1	0.00052	0.19
gut	I	FBgn0063667	CG32335	261663	24.64	117.54	0.0016	0.0015	0.0072	0.037	1.2	0.65	FALSE	FALSE	FALSE	FALSE	0.0072	0.045	0.57	0.67	-0.19	0.98	1	0.052	0.97
gut	I	FBgn0262007	CG42825	39179	27.24	17441.8	0.12	1.5e-06	0.21	0.00014	0.66	1.2	FALSE	FALSE	FALSE	FALSE	0.96	0.98	0.13	0.22	0.63	0.29	0.95	0.17	1
gut	I	FBgn0033446	CG1648	36009	31.27	1684.97	0.022	6.6e-05	0.057	0.0031	0.33	0.95	FALSE	FALSE	FALSE	FALSE	1.3e-05	0.00076	2.6e-09	1.5e-07	1.4	1	1	0.44	1
gut	I	FBgn0031533	CG2772	33559	27.16	1896.98	0.0071	0.00036	0.023	0.012	0.91	0.74	FALSE	FALSE	FALSE	FALSE	0.13	0.3	0.44	0.55	0.24	0.78	1	0.26	1
gut	I	FBgn0040942	CG12643	50416	24.83	168.61	0.0026	0.0013	0.01	0.032	0.61	0.6	FALSE	FALSE	FALSE	FALSE	0.11	0.27	0.27	0.39	0.2	0.62	1	0.33	1
gut	I	FBgn0030999	Mur18B	32912	26.63	48552.9	0.67	2.9e-10	0.77	7.2e-08	0.43	1.1	FALSE	FALSE	FALSE	FALSE	0.47	0.66	0.55	0.65	-0.61	0.69	1	0.18	1
gut	I	FBgn0035484	CG11594		26.61	2284.71	0.074	8.9e-06	0.15	0.0006	0.65	0.73	FALSE	FALSE	FALSE	FALSE	0.35	0.55	0.59	0.7	0.19	0.6	1	0.5	1
gut	I	FBgn0022023	eIF3h	45682	30.47	3742.92	0.0013	0.0057	0.0061	0.097	0.24	0.36	FALSE	FALSE	TRUE	FALSE	0.097	0.25	0.2	0.31	0.083	0.026	0.45	0.22	1
gut	I	FBgn0038829	CG17271	42463	31.04	845.68	0.0017	0.005	0.0072	0.089	0.45	0.44	FALSE	FALSE	FALSE	FALSE	0.025	0.1	0.81	0.87	0.03	0.67	1	0.26	1
gut	I	FBgn0036316	CG10960	39458	26.47	1517.49	0.021	0.00027	0.054	0.0094	0.91	0.6	FALSE	FALSE	FALSE	FALSE	0.14	0.31	0.74	0.81	0.12	0.8	1	0.27	1
gut	I	FBgn0027552	CG10863	38463	32.09	1782.4	0.34	1.7e-07	0.47	2.1e-05	0.069	0.76	FALSE	FALSE	FALSE	FALSE	0.0033	0.026	0.0013	0.0049	-0.27	0.49	1	0.011	0.55
gut	I	FBgn0034871	CG3906	37721	28.9	8430.08	0.0039	0.0026	0.014	0.055	0.4	0.54	FALSE	FALSE	FALSE	FALSE	0.17	0.35	0.22	0.32	0.15	0.29	0.95	0.085	1
gut	I	FBgn0030653	CG7860	32488	31.09	852.58	0.0074	0.0013	0.024	0.032	0.4	0.39	FALSE	FALSE	FALSE	FALSE	0.62	0.77	0.034	0.072	0.31	0.11	0.71	0.28	1
gut	I	FBgn0031520	CG8837	33545	25.71	703.69	0.017	0.00044	0.046	0.014	1.1	0.51	FALSE	FALSE	FALSE	FALSE	0.29	0.48	0.3	0.41	0.45	0.7	1	0.91	1
gut	I	FBgn0034439	CG10062	37224	24.34	339.61	0.044	0.00018	0.097	0.0071	1.3	0.83	FALSE	FALSE	FALSE	FALSE	0.32	0.52	0.48	0.59	0.45	0.73	1	0.37	1
gut	I	FBgn0036279	Ncc69	39410	27.61	1617.93	0.015	0.0013	0.042	0.032	0.88	0.41	FALSE	FALSE	FALSE	FALSE	0.18	0.37	0.00021	0.0011	1.5	0.74	1	0.0098	0.53
gut	I	FBgn0030520	Pdcd4	32337	24.76	1040.92	0.0083	0.0029	0.026	0.06	1.6	0.64	FALSE	FALSE	FALSE	FALSE	0.91	0.96	0.012	0.03	1.5	0.37	1	0.28	1
gut	I	FBgn0028429	I-2	39156	25.87	497.21	0.33	2.1e-06	0.46	0.00018	0.41	0.57	FALSE	FALSE	FALSE	FALSE	0.0006	0.0083	2.1e-06	2.6e-05	2.8	1	1	0.3	1
gut	I	FBgn0029885	CG3224	31600	26.62	433.18	0.0094	0.0038	0.029	0.072	0.45	0.41	FALSE	FALSE	FALSE	FALSE	0.033	0.12	8.5e-06	8.1e-05	0.95	0.77	1	0.38	1
gut	I	FBgn0000579	Eno	33351	35.43	7225.04	0.014	0.0059	0.04	0.1	0.16	0.34	FALSE	FALSE	TRUE	FALSE	0.81	0.89	0.0067	0.019	0.19	0.00079	0.31	0.22	1
gut	I	FBgn0039682	Obp99c	43494	27.2	287.51	0.22	0.0001	0.34	0.0044	0.22	1	FALSE	FALSE	FALSE	FALSE	0.0034	0.027	1.1e-05	0.0001	1	0.97	1	0.072	1
gut	I	FBgn0266064	GlyS	41823	27.35	1180.02	0.26	0.00028	0.38	0.0097	0.52	0.38	FALSE	FALSE	FALSE	FALSE	0.87	0.93	0.18	0.28	0.62	0.35	0.99	0.16	1
gut	I	FBgn0036053	iPLA2-VIA	39160	27.43	1621.49	0.53	6.3e-05	0.65	0.003	0.15	0.4	FALSE	FALSE	FALSE	FALSE	0.017	0.08	0.00039	0.0019	1	0.94	1	0.78	1
gut	I	FBgn0029813	AgmNAT	31512	25.57	69.59	0.52	0.0026	0.64	0.055	0.087	0.62	FALSE	FALSE	FALSE	FALSE	0.031	0.12	0.016	0.039	-0.35	0.7	1	0.21	1
gut	I	FBgn0011272	RpL13	34329	34.73	19841.7	0.56	0.0021	0.68	0.047	0.04	0.33	FALSE	FALSE	FALSE	FALSE	0.84	0.91	0.38	0.5	0.06	0.0017	0.31	0.39	1
gut	I	FBgn0029766	CG15784	31461	30.88	23896.1	0.96	6.5e-06	0.98	0.00046	0.01	0.71	FALSE	FALSE	FALSE	FALSE	0.0012	0.013	3.5e-05	0.00026	1.2	0.99	1	0.55	1
gut	I	FBgn0030157	CG1468	31920	30.41	15.25	0.76	0.00063	0.83	0.018	0.062	0.91	FALSE	FALSE	FALSE	FALSE	0.0053	0.036	0.00015	0.00084	0.95	0.97	1	0.86
gut	I	FBgn0003279	RpL4	43349	36.01	24195.1	0.84	0.00076	0.9	0.021	0.013	0.34	FALSE	FALSE	FALSE	FALSE	0.76	0.87	0.81	0.87	-0.016	0.0019	0.31	0.48	1
gut	I	FBgn0042206	GstD10	59240	27.98	243.59	0.95	0.00029	0.97	0.0097	0.014	0.78	FALSE	FALSE	FALSE	FALSE	0.00058	0.0081	1.6e-05	0.00014	-1.3	1	1	0.55	1
gut	I	FBgn0038043	CG17202	41526	28.67	151.95	0.96	0.00021	0.98	0.0079	0.007	0.55	FALSE	FALSE	FALSE	FALSE	0.082	0.22	0.016	0.039	0.38	0.56	1	0.018	0.67
gut	II	FBgn0259998	CG17571	35409	29.11	30052	0.0017	3.8e-11	0.0072	1.2e-08	0.54	-1	TRUE	FALSE	FALSE	FALSE	0.0038	0.028	0.33	0.45	-0.14	0.94	1	0.36	1
gut	II	FBgn0031139	CG11227	33071	26.51	21.25	0.0046	3.5e-10	0.016	8.6e-08	0.79	-1.7	TRUE	FALSE	FALSE	FALSE	0.039	0.14	0.94	0.96	0.02	0.89	1	0.28
gut	II	FBgn0035094	CG9380	38011	34.06	14208.4	7.3e-06	0.0011	0.00011	0.028	0.57	-0.52	TRUE	FALSE	FALSE	FALSE	0.028	0.11	0.011	0.028	0.26	0.4	1	0.16	1
gut	II	FBgn0030234	CG15211	32006	29.38	1698.18	0.00011	0.0012	0.00087	0.031	0.92	-0.46	TRUE	FALSE	FALSE	FALSE	0.016	0.076	0.26	0.37	0.22	0.91	1	0.39	1
gut	II	FBgn0038973	Pebp1	42644	36.41	12277	0.00016	0.0019	0.0012	0.043	0.51	-0.78	TRUE	FALSE	FALSE	FALSE	0.00068	0.009	0.31	0.43	-0.11	0.96	1	0.84	1
gut	II	FBgn0040060	yip7	38680	31.44	118054	0.0016	0.00022	0.007	0.0079	0.43	-0.62	TRUE	FALSE	FALSE	FALSE	0.0014	0.014	0.12	0.2	-0.19	0.95	1	0.44	1
gut	II	FBgn0011554	etaTry	36217	30.06	3121.63	0.0024	0.00095	0.0097	0.025	0.55	-0.57	TRUE	TRUE	FALSE	FALSE	0.00016	0.0034	0.0051	0.015	-0.5	1	1	0.63	1
gut	II	FBgn0261274	Ero1L	38500	26.46	1539.91	0.17	3.5e-07	0.28	3.9e-05	0.23	-0.6	TRUE	FALSE	FALSE	FALSE	0.00042	0.0067	0.00019	0.001	-0.75	0.99	1	0.47	1
gut	II	FBgn0031143	CG1532	33076	33.3	2862.97	0.0045	0.0013	0.016	0.032	0.21	-0.51	TRUE	FALSE	FALSE	FALSE	0.00046	0.0071	0.012	0.031	-0.18	0.7	1	0.67	1
gut	II	FBgn0039045	CG17119	42723	27.62	1834.61	0.075	1.5e-05	0.15	0.00091	0.52	-0.68	TRUE	FALSE	FALSE	FALSE	0.17	0.35	0.88	0.92	-0.041	0.71	1	0.71	1
gut	II	FBgn0040069	vanin-like	31551	27.43	1376.11	0.64	3.4e-09	0.74	6.7e-07	0.07	-1.5	TRUE	FALSE	FALSE	FALSE	4.7e-05	0.0016	1.5e-06	2e-05	-1	1	1	0.2	1
gut	II	FBgn0062412	Ctr1B	40989	22.04	929.51	0.22	3.2e-06	0.33	0.00026	1.5	-1.1	TRUE	FALSE	FALSE	FALSE	0.59	0.76	0.61	0.71	0.59	0.63	1	0.27	1
gut	II	FBgn0035926	CG5804	39005	35.6	23672.9	0.016	0.0045	0.043	0.082	0.24	-0.64	TRUE	FALSE	FALSE	FALSE	0.00014	0.0031	0.00061	0.0027	-0.37	0.98	1	0.71	1
gut	II	FBgn0040299	Myo28B1	53515	25.52	7978.08	0.038	0.002	0.086	0.046	0.4	-0.51	TRUE	FALSE	FALSE	FALSE	0.87	0.93	0.023	0.053	0.44	0.12	0.74	0.36	1
gut	II	FBgn0038484	CG5246	42072	24.09	9476.95	0.7	4e-07	0.79	4.3e-05	0.23	-1.2	TRUE	FALSE	FALSE	FALSE	0.016	0.076	0.0033	0.011	-1.9	0.98	1	0.086	1
gut	II	FBgn0036286	CG10616	39420	27.46	587.25	0.048	0.0055	0.1	0.096	0.41	-0.29	TRUE	FALSE	FALSE	FALSE	0.79	0.88	0.1	0.17	0.34	0.17	0.82	0.71	1
gut	II	FBgn0085359	CG34330	2768869	31.17	11592.9	0.22	0.0016	0.34	0.038	0.17	-0.41	TRUE	FALSE	FALSE	FALSE	0.014	0.072	0.019	0.045	-0.34	0.81	1	0.51	1
gut	II	FBgn0033774	CG12374	36410	30.47	506784	0.2	0.0023	0.32	0.05	0.14	-0.54	TRUE	FALSE	FALSE	FALSE	3.7e-05	0.0015	5.5e-06	5.7e-05	-0.66	1	1	0.65	1
gut	II	FBgn0027341	Gfat1	3354921	29.96	1551.04	0.17	0.0044	0.28	0.082	0.16	-0.37	TRUE	FALSE	FALSE	FALSE	0.07	0.2	0.21	0.31	-0.15	0.43	1	0.81	1
gut	II	FBgn0000565	Eip71CD	39675	27.98	2434.48	0.35	0.001	0.48	0.027	0.14	-0.69	TRUE	FALSE	FALSE	FALSE	0.035	0.13	0.036	0.075	-0.34	0.75	1	0.71	1
gut	II	FBgn0053111	CG33111	50068	29.99	614.8	0.48	0.00093	0.61	0.025	0.19	-0.41	TRUE	FALSE	FALSE	FALSE	0.69	0.82	0.21	0.32	0.34	0.31	0.97	0.093	1
gut	II	FBgn0039187	CG6454	42904	25.94	2179.02	0.36	0.0043	0.49	0.08	0.46	-0.33	TRUE	FALSE	FALSE	FALSE	0.82	0.9	0.22	0.33	0.62	0.4	1	0.4	1
gut	II	FBgn0036372	Abp1	39520	30.28	1702.18	0.52	0.0025	0.64	0.055	0.059	-0.38	TRUE	FALSE	FALSE	FALSE	0.18	0.37	0.018	0.042	0.23	0.1	0.71	0.58	1
gut	II	FBgn0051148	Gba1a	42796	30.46	7428.34	0.6	0.0017	0.71	0.039	0.089	-0.64	TRUE	FALSE	FALSE	FALSE	0.013	0.068	0.0036	0.011	-0.55	0.89	1	0.68	1
gut	II	FBgn0037443	Dmtn	40792	24.99	1653.27	0.59	0.0018	0.7	0.041	0.36	-0.53	TRUE	FALSE	FALSE	FALSE	0.79	0.89	0.87	0.91	0.11	0.46	1	0.026	0.77
gut	II	FBgn0038916	dnd	42580	28.11	644.72	0.58	0.0032	0.7	0.065	0.1	-0.59	TRUE	FALSE	FALSE	FALSE	0.46	0.65	0.12	0.21	0.3	0.3	0.96	0.67	1
gut	II	FBgn0027505	Rab3-GAP	34626	23.96	948.32	0.93	0.0045	0.95	0.082	0.056	-0.27	TRUE	FALSE	FALSE	FALSE	0.59	0.76	0.51	0.62	-0.4	0.56	1	0.37	1
gut	II	FBgn0000536	eas	32585	29.53	1888.09	0.96	0.0035	0.98	0.069	0.0079	-0.3	TRUE	FALSE	FALSE	FALSE	0.65	0.8	0.49	0.6	0.11	0.14	0.78	0.023	0.74
gut	II	FBgn0262124	uex	5740320	29.67	1759.03	0.96	0.005	0.98	0.09	0.0043	-0.42	TRUE	FALSE	FALSE	FALSE	0.15	0.33	0.054	0.1	-0.17	0.085	0.66	0.0036	0.37
gut	III	FBgn0038098	CG7381	41589	25.65	12599	2.2e-07	1.1e-11	7.7e-06	3.9e-09	-3.2	-1.5	FALSE	FALSE	FALSE	FALSE	0.94	0.97	2.6e-07	5.1e-06	-3.2	0.3	0.96	0.58	1
gut	III	FBgn0026314	Ugt35b	41333	24.95	674.74	2e-06	3.5e-19	4.1e-05	2.8e-16	-3.5	-2.1	FALSE	FALSE	FALSE	FALSE	0.11	0.28	0.00024	0.0013	-2.3	0.87	1	0.0026	0.34
gut	III	FBgn0035309	CG15879	38274	26.66	664.91	6e-11	4.4e-07	2.3e-08	4.7e-05	-2	-1.1	FALSE	FALSE	FALSE	FALSE	0.01	0.057	1.4e-08	4.8e-07	-1.4	0.87	1	0.011	0.56
gut	III	FBgn0035620	CG5150	38633	30.39	15639.7	1.8e-08	1.3e-08	1.3e-06	2.2e-06	-0.96	-1	FALSE	FALSE	FALSE	FALSE	0.0048	0.033	4.1e-11	1.4e-08	-1.4	0.78	1	0.14	1
gut	III	FBgn0016123	Alp4	43671	31.33	6193.32	2.5e-11	6.1e-06	2e-08	0.00045	-1.6	-0.75	FALSE	FALSE	TRUE	FALSE	0.44	0.63	8.9e-11	1.8e-08	-1.5	0.091	0.67	0.048	0.93
gut	III	FBgn0261675	Npc1b	33072	29.87	29493.6	9.8e-08	4.6e-09	4.4e-06	8.7e-07	-1.8	-1.3	FALSE	FALSE	FALSE	FALSE	0.039	0.14	8.6e-10	6.9e-08	-2.5	0.86	1	0.75	1
gut	III	FBgn0051410	Npc2e	326136	26.57	12387.9	0.00014	3.7e-13	0.001	1.6e-10	-2.7	-1.6	FALSE	FALSE	FALSE	FALSE	0.37	0.57	0.0023	0.0081	-2	0.68	1	0.21	1
gut	III	FBgn0015569	alpha-Est10	40896	25.71	389.34	2.7e-06	9.4e-10	5.2e-05	2.1e-07	-2	-1	FALSE	FALSE	FALSE	FALSE	0.047	0.16	0.0015	0.0056	-1.1	0.9	1	0.11	1
gut	III	FBgn0032775	CG17544	35213	31.3	6648.33	8.1e-08	2.6e-07	3.9e-06	3e-05	-0.7	-0.77	FALSE	FALSE	FALSE	FALSE	0.0019	0.017	6e-11	1.6e-08	-1.1	0.74	1	0.45	1
gut	III	FBgn0039321	CG10550	43061	30.3	2974.98	1.3e-05	5e-09	0.00017	9.4e-07	-0.72	-1.1	FALSE	FALSE	FALSE	FALSE	0.051	0.17	5.9e-08	1.5e-06	-1.1	0.55	1	0.12	1
gut	III	FBgn0011555	thetaTry	36218	26.71	16821.5	1e-07	6.8e-06	4.5e-06	0.00048	-1.1	-0.77	FALSE	FALSE	FALSE	FALSE	0.025	0.1	7.7e-05	0.00049	-0.65	0.71	1	0.34	1
gut	III	FBgn0033205	CG2064	35708	31.18	1813.28	2.4e-08	4.8e-05	1.6e-06	0.0025	-0.88	-0.71	FALSE	FALSE	FALSE	FALSE	0.0064	0.042	7.9e-05	0.00049	-0.47	0.68	1	0.29	1
gut	III	FBgn0040256	Ugt86Dd	53507	28.2	1900.56	1.4e-06	3e-06	3e-05	0.00024	-4.5	-0.92	FALSE	TRUE	FALSE	FALSE	0.00014	0.0031	0.77	0.84	-0.19	1	1	0.009	0.52
gut	III	FBgn0034436	CG11961	37221	31.87	11340	1.6e-09	0.00064	2.2e-07	0.018	-1.3	-0.44	FALSE	FALSE	FALSE	FALSE	0.29	0.48	2e-10	2.5e-08	-1.4	0.15	0.79	0.54	1
gut	III	FBgn0264776	CG44014	41893	25.42	6300.49	3.1e-06	2.4e-06	5.7e-05	0.0002	-2.5	-0.98	FALSE	FALSE	FALSE	FALSE	0.18	0.37	0.00018	0.00096	-1.8	0.77	1	0.82	1
gut	III	FBgn0039756	CG9743	43593	24.23	10425.6	0.004	1.4e-10	0.015	3.8e-08	-1.5	-1.1	FALSE	FALSE	FALSE	FALSE	0.8	0.89	0.0089	0.024	-1.4	0.4	1	0.88	1
gut	III	FBgn0030521	CtsB1	32341	30.93	10853	7.3e-10	0.0039	1.4e-07	0.075	-1.3	-0.36	FALSE	FALSE	TRUE	FALSE	0.61	0.77	2e-09	1.2e-07	-1.3	0.061	0.6	0.47	1
gut	III	FBgn0036337	AdenoK	39479	30.47	1369.57	6.5e-06	1.6e-05	9.9e-05	0.00097	-0.74	-0.59	FALSE	FALSE	TRUE	FALSE	0.84	0.92	3.7e-06	4.2e-05	-0.77	0.039	0.52	0.12	1
gut	III	FBgn0013772	Cyp6a8	36666	28.17	468.89	7.5e-08	0.00066	3.7e-06	0.019	-1.9	-0.78	FALSE	TRUE	FALSE	FALSE	0.0006	0.0083	0.01	0.027	-0.61	1	1	0.44	1
gut	III	FBgn0034580	Cht8	37390	23.84	1392.57	6.5e-05	2e-06	0.00059	0.00018	-1.7	-1.1	FALSE	FALSE	FALSE	FALSE	0.0069	0.044	0.4	0.51	-0.29	0.98	1	0.0037	0.37
gut	III	FBgn0031249	CG11911	33206	28.82	23390.1	3e-07	0.0004	9.3e-06	0.013	-1.3	-0.68	FALSE	FALSE	FALSE	FALSE	0.056	0.18	3e-09	1.6e-07	-1.8	0.72	1	0.57	1
gut	III	FBgn0263120	Acsl	46068	33.34	20632.7	2.4e-07	0.00071	8.1e-06	0.02	-0.59	-0.44	FALSE	FALSE	FALSE	FALSE	0.0032	0.026	2e-10	2.5e-08	-0.94	0.53	1	0.35	1
gut	III	FBgn0010425	epsilonTry	49080	27.7	39721.8	4.2e-07	0.00053	1.2e-05	0.016	-1.6	-0.63	FALSE	FALSE	FALSE	FALSE	0.4	0.59	4.2e-06	4.6e-05	-1.4	0.39	1	0.49	1
gut	III	FBgn0031412	CG16995	33413	26.17	130	0.0015	2.4e-07	0.0066	2.7e-05	-1.5	-1.2	FALSE	FALSE	FALSE	FALSE	0.062	0.19	3.8e-06	4.3e-05	-2.7	0.91	1	0.88	1
gut	III	FBgn0033302	Cyp6a14	35835	29.56	2612.81	2e-05	5.5e-05	0.00023	0.0027	-0.68	-0.74	FALSE	FALSE	FALSE	FALSE	0.016	0.075	0.064	0.12	-0.23	0.73	1	0.58	1
gut	III	FBgn0040342	CG3706	53540	29.14	4734.58	5.8e-06	0.00021	9.1e-05	0.0077	-0.52	-0.68	FALSE	FALSE	FALSE	FALSE	0.0016	0.016	1e-09	7.9e-08	-0.94	0.77	1	0.46	1
gut	III	FBgn0260960	Baldspot	39860	28.02	5620.2	0.013	6.6e-09	0.037	1.2e-06	-0.34	-0.99	FALSE	TRUE	FALSE	FALSE	1.8e-05	0.00099	3.7e-05	0.00026	0.68	1	1	0.012	0.57
gut	III	FBgn0037906	PGRP-LB	41379	29.97	760.5	2.3e-07	0.0027	7.9e-06	0.056	-1.6	-0.51	FALSE	FALSE	FALSE	FALSE	0.89	0.94	3.3e-07	6e-06	-1.6	0.15	0.79	0.17	1
gut	III	FBgn0035619	CG10592	38632	30.1	15386.8	9.1e-07	0.0037	2.2e-05	0.072	-0.74	-0.56	FALSE	FALSE	FALSE	FALSE	0.034	0.13	4.5e-09	2.1e-07	-1.1	0.46	1	0.79	1
gut	III	FBgn0036975	CG5618	40241	29.07	3290.39	0.00089	1.4e-05	0.0044	0.00083	-0.55	-0.65	FALSE	FALSE	FALSE	FALSE	0.00039	0.0064	8.4e-09	3.4e-07	-1.4	0.99	1	0.84	1
gut	III	FBgn0030510	CG12177	32326	24.12	608.23	0.0018	5.2e-06	0.0077	0.00039	-1.8	-0.8	FALSE	FALSE	FALSE	FALSE	0.79	0.89	0.00078	0.0033	-1.9	0.41	1	0.55	1
gut	III	FBgn0086532	Spt-I	36448	26.84	2092.05	4.6e-06	0.0028	7.6e-05	0.058	-0.99	-0.4	FALSE	FALSE	FALSE	FALSE	0.00094	0.011	0.39	0.51	-0.13	0.99	1	0.57	1
gut	III	FBgn0039316	CG11893	43056	29.76	594.12	1.3e-05	0.0016	0.00017	0.037	-0.98	-0.79	FALSE	TRUE	FALSE	FALSE	0.00028	0.005	0.67	0.76	0.073	1	1	0.0073	0.48
gut	III	FBgn0038199	CCHa1	41711	23.51	199.44	0.011	2.7e-06	0.031	0.00022	-1	-0.93	FALSE	FALSE	FALSE	FALSE	0.081	0.22	0.81	0.87	-0.086	0.87	1	0.043	0.89
gut	III	FBgn0035515	CG14997	38514	30.08	1111.26	9.9e-05	0.00097	0.00081	0.026	-0.56	-0.58	FALSE	FALSE	TRUE	FALSE	0.78	0.88	4.3e-05	0.0003	-0.6	0.039	0.52	0.83	1
gut	III	FBgn0028920	CG8997	34799	27.33	47302.3	6.5e-05	0.0014	0.00059	0.035	-2	-0.57	FALSE	FALSE	FALSE	FALSE	0.3	0.5	3.1e-06	3.6e-05	-2.6	0.67	1	0.57	1
gut	III	FBgn0038740	CG4562	42362	33.21	17670.7	2.2e-05	0.0036	0.00025	0.071	-0.49	-0.67	FALSE	FALSE	FALSE	FALSE	0.00055	0.0079	1e-09	7.8e-08	-0.99	0.91	1	0.68	1
gut	III	FBgn0031813	CG9527	33898	33.55	15279.9	1.8e-05	0.0047	0.00021	0.084	-0.42	-0.42	FALSE	FALSE	FALSE	FALSE	3.2e-05	0.0014	8e-11	1.8e-08	-0.98	0.98	1	0.64	1
gut	III	FBgn0026570	CG5704	48613	25.28	315.2	0.0002	0.00086	0.0014	0.023	-2.3	-0.73	FALSE	FALSE	FALSE	FALSE	0.66	0.8	0.00082	0.0034	-2	0.49	1	0.32	1
gut	III	FBgn0039769	CG15534	43613	28.39	10819.2	0.00033	0.00066	0.002	0.019	-1.2	-0.57	FALSE	FALSE	FALSE	FALSE	0.68	0.81	8.9e-05	0.00055	-1.3	0.31	0.97	0.36	1
gut	III	FBgn0037562	CG11671	40976	31.58	810.66	2.4e-05	0.0055	0.00027	0.095	-1.4	-0.72	FALSE	FALSE	FALSE	FALSE	0.15	0.32	0.0025	0.0086	-0.85	0.7	1	0.45	1
gut	III	FBgn0037890	CG17734	41359	28.84	867.5	0.00049	0.00048	0.0028	0.015	-0.41	-0.57	FALSE	FALSE	FALSE	FALSE	0.11	0.28	3.6e-06	4.1e-05	-0.63	0.2	0.86	0.095	1
gut	III	FBgn0010812	unc-45	44910	27.46	1323.74	0.00035	0.00069	0.0022	0.019	-1.8	-0.39	FALSE	FALSE	FALSE	FALSE	0.19	0.38	0.023	0.052	-1	0.78	1	0.66	1
gut	III	FBgn0031913	CG5958	34022	33.37	4251.74	0.00016	0.002	0.0012	0.045	-0.47	-0.65	FALSE	FALSE	FALSE	FALSE	2.9e-05	0.0013	2.8e-10	3e-08	-1.3	1	1	0.99	1
gut	III	FBgn0031248	CG11912	33205	27.59	3181.66	0.3	1.4e-09	0.43	2.9e-07	-0.17	-1.1	FALSE	FALSE	FALSE	FALSE	0.79	0.88	0.17	0.26	-0.23	0.12	0.74	0.78	1
gut	III	FBgn0039311	CG10513	43051	31.14	13583.5	0.00088	0.00056	0.0044	0.017	-0.81	-0.67	FALSE	FALSE	FALSE	FALSE	0.58	0.75	0.00015	0.00086	-0.97	0.27	0.92	0.54	1
gut	III	FBgn0039315	CG13658	43055	29.24	1298.04	0.00036	0.0017	0.0022	0.04	-0.72	-0.74	FALSE	FALSE	FALSE	FALSE	0.093	0.24	0.076	0.14	-0.31	0.62	1	0.079	1
gut	III	FBgn0033717	CG8839	36340	32.05	7882.24	0.0023	0.00034	0.0092	0.011	-0.25	-0.32	FALSE	FALSE	FALSE	FALSE	0.008	0.048	4e-07	7e-06	-0.54	0.33	0.97	0.9	1
gut	III	FBgn0025866	CalpB	39165	28.45	1081.61	0.00051	0.0021	0.0029	0.047	-0.57	-0.55	FALSE	FALSE	TRUE	FALSE	0.93	0.96	0.00038	0.0018	-0.59	0.055	0.58	0.43	1
gut	III	FBgn0004638	drk	36497	29.62	572.84	0.00044	0.0027	0.0026	0.057	-0.55	-0.34	FALSE	FALSE	FALSE	FALSE	0.0078	0.048	0.95	0.97	-0.0086	0.86	1	0.00041	0.16
gut	III	FBgn0034642	CG15674	37463	24.84	2793.9	0.032	1.1e-05	0.076	0.00072	-1.3	-0.79	FALSE	FALSE	FALSE	FALSE	0.94	0.97	0.026	0.058	-1.3	0.36	1	0.64	1
gut	III	FBgn0034711	Alp2	37539	31.47	1449.19	0.01	8.5e-05	0.031	0.0038	-0.39	-0.91	FALSE	FALSE	FALSE	FALSE	0.00077	0.0097	0.011	0.028	0.39	0.98	1	0.076	1
gut	III	FBgn0259979	CG17337	35507	34.88	4377.5	0.00048	0.0029	0.0028	0.061	-0.44	-0.64	FALSE	FALSE	TRUE	FALSE	0.93	0.96	0.00064	0.0028	-0.43	0.019	0.43	0.15	1
gut	III	FBgn0033844	bbc	36496	25.38	2848.27	0.00067	0.0023	0.0035	0.05	-1.8	-0.4	FALSE	FALSE	FALSE	FALSE	0.11	0.26	0.1	0.18	-0.76	0.87	1	0.88	1
gut	III	FBgn0036770	Prestin	39996	27.73	2281.08	0.00031	0.0052	0.002	0.091	-0.64	-0.48	FALSE	FALSE	FALSE	FALSE	0.25	0.45	0.012	0.031	-0.4	0.31	0.96	0.28	1
gut	III	FBgn0026593	CG5707	48422	27.1	1900.74	0.012	0.0001	0.035	0.0044	-0.49	-0.62	FALSE	FALSE	FALSE	FALSE	0.54	0.72	0.072	0.13	-0.33	0.23	0.89	0.45	1
gut	III	FBgn0052750	CG32750	326238	24.79	901.49	0.098	1.8e-06	0.18	0.00016	-1.4	-1.1	FALSE	FALSE	FALSE	FALSE	0.43	0.62	0.55	0.65	-0.48	0.69	1	0.11	1
gut	III	FBgn0020369	Rpt6	33105	31.69	1882.29	0.00093	0.0027	0.0046	0.056	-0.37	-0.35	FALSE	FALSE	TRUE	FALSE	0.23	0.42	2.1e-05	0.00017	-0.53	0.097	0.69	0.86	1
gut	III	FBgn0034318	CG14500	37087	24.27	1935.05	0.021	0.0001	0.055	0.0044	-0.77	-0.59	FALSE	FALSE	FALSE	FALSE	0.41	0.6	0.2	0.3	-0.41	0.52	1	0.5	1
gut	III	FBgn0029762	NAAT1	31457	24.75	2783.18	0.016	0.00018	0.044	0.0071	-0.83	-0.55	FALSE	FALSE	FALSE	FALSE	0.36	0.55	0.00085	0.0035	-1.2	0.57	1	0.018	0.67
gut	III	FBgn0035089	Phk-3	37997	25.63	92.9	0.0011	0.0048	0.0054	0.085	-1.1	-0.62	FALSE	TRUE	FALSE	FALSE	0.0011	0.012	0.12	0.2	0.45	1	1	0.39	1
gut	III	FBgn0031571	bark	33604	27.42	4479.5	0.096	8e-06	0.18	0.00055	-0.29	-0.7	FALSE	FALSE	FALSE	FALSE	0.87	0.93	0.062	0.12	-0.33	0.1	0.71	0.058	1
gut	III	FBgn0030331	CG15221	32127	24.93	566.42	0.071	2e-05	0.14	0.0012	-0.41	-0.62	FALSE	FALSE	FALSE	FALSE	0.016	0.078	0.084	0.15	0.39	0.93	1	0.0092	0.53
gut	III	FBgn0027085	LeuRS-m	38581	25.23	692.54	0.023	0.0002	0.058	0.0076	-0.61	-0.43	FALSE	FALSE	FALSE	FALSE	0.59	0.75	0.0042	0.013	-0.8	0.33	0.98	0.86	1
gut	III	FBgn0036449	bmm	39611	24.76	1784.95	0.015	0.00064	0.043	0.018	-1.4	-0.66	FALSE	FALSE	FALSE	FALSE	0.12	0.28	9.6e-05	0.00059	-2.7	0.88	1	0.66	1
gut	III	FBgn0042094	Adk3	41318	31.51	714.81	0.029	0.00026	0.07	0.009	-0.25	-0.53	FALSE	FALSE	FALSE	FALSE	0.022	0.094	1.4e-05	0.00012	-0.61	0.57	1	0.46	1
gut	III	FBgn0053116	CG33116	326259	26.03	454.41	0.017	0.00062	0.045	0.018	-0.47	-0.47	FALSE	FALSE	FALSE	FALSE	0.077	0.21	1	1	0.0011	0.7	1	0.71	1
gut	III	FBgn0020545	kraken	33265	27.7	4792.7	0.004	0.0046	0.014	0.084	-0.94	-0.5	FALSE	FALSE	FALSE	FALSE	0.19	0.38	0.19	0.29	-0.39	0.7	1	0.075	1
gut	III	FBgn0010387	Dbi	38784	35.86	6131.21	0.2	6.4e-06	0.32	0.00046	-0.12	-0.84	FALSE	FALSE	FALSE	FALSE	0.0042	0.03	1.3e-05	0.00011	-0.56	0.76	1	0.63	1
gut	III	FBgn0040309	Jafrac1	53578	34.53	4895.82	0.14	6.9e-05	0.24	0.0033	-0.12	-0.51	FALSE	FALSE	FALSE	FALSE	0.18	0.37	0.0027	0.0089	-0.28	0.061	0.6	0.2	1
gut	III	FBgn0028916	CG33090	34835	23.87	1339.24	0.17	4.4e-05	0.29	0.0023	-0.66	-0.68	FALSE	FALSE	FALSE	FALSE	0.5	0.68	0.66	0.75	-0.21	0.57	1	0.72	1
gut	III	FBgn0035904	GstO3	38972	32.06	4339.87	0.012	0.0054	0.034	0.095	-0.32	-0.42	FALSE	FALSE	FALSE	FALSE	0.3	0.5	0.21	0.31	-0.15	0.15	0.79	0.35	1
gut	III	FBgn0031590	CG3702	33628	29.42	3667.89	0.037	0.0017	0.085	0.04	-0.26	-0.37	FALSE	FALSE	TRUE	FALSE	0.46	0.64	0.0038	0.012	-0.38	0.098	0.7	0.42	1
gut	III	FBgn0038752	CG4462	42376	24.58	1360.36	0.089	0.00046	0.17	0.015	-0.86	-0.67	FALSE	FALSE	FALSE	FALSE	0.47	0.66	0.45	0.57	-0.37	0.59	1	0.95	1
gut	III	FBgn0034612	CG10505	37428	23.9	1503.04	0.15	0.00018	0.25	0.007	-0.67	-0.63	FALSE	FALSE	FALSE	FALSE	0.67	0.81	0.047	0.094	-0.94	0.46	1	0.44	1
gut	III	FBgn0032350	CG6287	34554	33.6	2257.59	0.095	0.00053	0.18	0.016	-0.13	-0.28	FALSE	FALSE	FALSE	FALSE	0.53	0.71	0.016	0.038	-0.19	0.0067	0.39	0.51	1
gut	III	FBgn0031516	CG9663	33541	23.64	2285.7	0.032	0.0041	0.075	0.078	-0.74	-0.56	FALSE	FALSE	FALSE	FALSE	0.86	0.92	0.019	0.045	-0.82	0.28	0.94	0.7	1
gut	III	FBgn0037930	CG14715	41403	28.31	194	0.17	0.00026	0.28	0.0091	-0.28	-0.79	FALSE	FALSE	FALSE	FALSE	0.55	0.73	0.034	0.072	-0.45	0.27	0.93	0.95	1
gut	III	FBgn0010395	Itgbn	35368	25.7	2441.38	0.077	0.0015	0.15	0.036	-1.4	-0.44	FALSE	FALSE	FALSE	FALSE	0.19	0.38	0.96	0.97	0.042	0.85	1	0.14	1
gut	III	FBgn0015577	alpha-Est9	40897	25.13	1451.14	0.11	0.00076	0.2	0.021	-0.62	-0.62	FALSE	FALSE	FALSE	FALSE	0.55	0.73	0.021	0.05	-0.94	0.48	1	0.19	1
gut	III	FBgn0031968	CG7231	34086	27.46	1387.4	0.75	3.5e-07	0.83	3.9e-05	-0.093	-1.1	FALSE	FALSE	FALSE	FALSE	0.44	0.63	0.17	0.26	-0.41	0.48	1	0.001	0.25
gut	III	FBgn0263133	mEFG1	34004	29.5	456.09	0.063	0.0031	0.13	0.064	-0.21	-0.41	FALSE	FALSE	FALSE	FALSE	0.57	0.74	0.012	0.03	-0.3	0.058	0.59	0.94	1
gut	III	FBgn0032018	CG7806	34140	26.16	2407.19	0.15	0.00092	0.25	0.025	-0.24	-0.4	FALSE	FALSE	FALSE	FALSE	0.33	0.53	0.91	0.94	-0.018	0.3	0.96	0.31	1
gut	III	FBgn0039818	CG11318	43678	27.06	1449.41	0.079	0.0038	0.16	0.072	-0.7	-0.57	FALSE	FALSE	FALSE	FALSE	0.07	0.2	0.4	0.52	0.33	0.89	1	0.41	1
gut	III	FBgn0035833	CG7565	38893	25.98	1149.65	0.38	0.0001	0.5	0.0044	-0.16	-0.48	FALSE	FALSE	FALSE	FALSE	0.41	0.61	0.79	0.85	0.049	0.31	0.96	0.9	1
gut	III	FBgn0002121	l(2)gl	33156	31.88	8987.62	0.47	4e-05	0.6	0.0021	-0.054	-0.63	FALSE	FALSE	FALSE	FALSE	0.069	0.2	0.0028	0.0092	-0.26	0.099	0.7	0.00033	0.15
gut	III	FBgn0027583	CG7601	43502	27.21	600.77	0.094	0.0044	0.18	0.082	-0.31	-0.38	FALSE	FALSE	FALSE	FALSE	0.16	0.35	0.0013	0.0049	-0.67	0.54	1	0.3	1
gut	III	FBgn0035497	CG14995	38487	23.99	98.24	0.098	0.0056	0.18	0.097	-0.98	-0.65	FALSE	FALSE	FALSE	FALSE	0.015	0.075	0.056	0.11	1.1	0.98	1	0.13	1
gut	III	FBgn0036995	atk	40266	24.92	54.75	0.47	0.00013	0.6	0.0054	-0.65	-0.92	FALSE	FALSE	FALSE	FALSE	0.4	0.59	0.63	0.72	0.44	0.72	1	0.0075	0.49
gut	III	FBgn0034417	CG15117	37197	27.2	1453.3	0.37	0.00039	0.5	0.013	-0.18	-0.42	FALSE	FALSE	FALSE	FALSE	0.45	0.64	0.06	0.11	-0.4	0.34	0.98	0.39	1
gut	III	FBgn0052699	LPCAT	31899	24.68	1104.09	0.22	0.005	0.33	0.09	-0.69	-0.47	FALSE	FALSE	FALSE	FALSE	0.095	0.25	0.0014	0.0053	-2	0.9	1	0.14	1
gut	III	FBgn0031969	pes	34087	24.88	6147.01	0.55	0.00078	0.67	0.022	-0.29	-0.5	FALSE	FALSE	FALSE	FALSE	0.6	0.76	0.89	0.93	0.066	0.51	1	0.8	1
gut	III	FBgn0037144	CG7458	40441	25.58	1000.15	0.76	0.00014	0.83	0.0055	-0.1	-0.39	FALSE	FALSE	FALSE	FALSE	0.065	0.19	0.0063	0.018	-0.98	0.88	1	1	1
gut	III	FBgn0031381	Npc2a	33374	28.65	1177.86	0.74	0.00058	0.82	0.017	-0.04	-0.5	FALSE	FALSE	FALSE	FALSE	0.21	0.4	0.15	0.25	0.18	0.24	0.89	0.37	1
gut	III	FBgn0040336	Seipin	31245	24.67	2413.71	0.66	0.0016	0.76	0.039	-0.43	-0.62	FALSE	FALSE	FALSE	FALSE	0.44	0.63	0.51	0.62	0.65	0.7	1	0.59	1
gut	III	FBgn0029795	CG15773	31494	23.71	795.49	0.67	0.0022	0.76	0.049	-0.14	-0.53	FALSE	FALSE	FALSE	FALSE	0.15	0.33	0.02	0.046	-0.81	0.76	1	0.65	1
gut	III	FBgn0025709	CNT2	35914	25.23	2170.27	0.82	0.00068	0.88	0.019	-0.048	-0.66	FALSE	FALSE	FALSE	FALSE	0.35	0.55	0.13	0.21	-0.32	0.41	1	0.3	1
gut	III	FBgn0026565	Ass	40812	31.4	7207.4	0.86	0.0023	0.9	0.051	-0.018	-0.47	FALSE	FALSE	FALSE	FALSE	0.00046	0.0071	7.4e-06	7.2e-05	-0.62	0.96	1	0.72	1
gut	III	FBgn0036309	Hip1	39450	30.32	982.87	0.97	0.00054	0.99	0.016	-0.0027	-0.56	FALSE	FALSE	FALSE	FALSE	0.76	0.87	0.65	0.74	-0.039	0.0099	0.39	0.0023	0.33
gut	III	FBgn0037819	CG14688	41275	27.53	730.8	0.95	0.0033	0.97	0.066	-0.009	-0.46	FALSE	FALSE	FALSE	FALSE	0.044	0.15	0.0058	0.017	-0.41	0.63	1	0.31	1
gut	IV	FBgn0010038	GstD2	48335	25.3	535.77	0.03	1.2e-10	0.073	3.4e-08	-1.8	1.7	TRUE	FALSE	FALSE	FALSE	0.62	0.78	0.12	0.2	-1.2	0.57	1	0.11	1
gut	IV	FBgn0020618	Rack1	34070	33.05	27298.2	4.7e-06	0.00029	7.6e-05	0.0099	-0.49	0.47	TRUE	FALSE	FALSE	FALSE	0.031	0.12	1.5e-08	5e-07	-0.74	0.2	0.86	0.07	1
gut	IV	FBgn0023197	Jon74E	39959	29.89	22040.6	5.2e-05	0.0031	0.0005	0.064	-0.98	0.55	TRUE	FALSE	FALSE	FALSE	0.02	0.09	6e-08	1.5e-06	-1.6	0.88	1	0.075	1
gut	IV	FBgn0024289	Sodh-1	40836	28.71	1101.26	0.0094	1.1e-05	0.029	0.00068	-0.52	0.69	TRUE	FALSE	FALSE	FALSE	0.14	0.32	8.3e-05	0.00052	-0.91	0.57	1	0.11	1
gut	IV	FBgn0026428	HDAC6	32461	29.09	8073.57	0.0089	1.2e-05	0.028	0.00077	-0.32	0.42	TRUE	FALSE	TRUE	FALSE	0.46	0.65	0.00087	0.0036	-0.43	0.078	0.64	0.51	1
gut	IV	FBgn0263241	Mocs1	39238	24.22	972.6	0.046	9.3e-07	0.1	8.8e-05	-0.61	0.91	TRUE	FALSE	FALSE	FALSE	0.014	0.069	0.1	0.18	0.49	0.96	1	0.33	1
gut	IV	FBgn0039580	Gfat2	43373	30.27	2861.5	0.00013	0.0033	0.00099	0.067	-0.57	0.32	TRUE	FALSE	TRUE	FALSE	0.73	0.85	4.6e-05	0.00031	-0.63	0.052	0.57	0.6	1
gut	IV	FBgn0035476	CG12766	38462	27.24	687.77	0.0094	0.00019	0.029	0.0074	-0.49	0.84	TRUE	FALSE	FALSE	FALSE	0.5	0.68	0.07	0.13	-0.32	0.23	0.89	0.012	0.57
gut	IV	FBgn0010265	RpS13	34149	33.36	9872.59	0.0016	0.0037	0.007	0.072	-0.42	0.41	TRUE	FALSE	FALSE	FALSE	0.032	0.12	1.6e-06	2.2e-05	-0.8	0.58	1	0.063	1
gut	IV	FBgn0030245	CG1637	32019	23.85	3625.66	0.024	0.00021	0.06	0.0077	-0.63	0.33	TRUE	FALSE	FALSE	FALSE	0.3	0.5	0.00091	0.0037	-1	0.55	1	0.013	0.59
gut	IV	FBgn0031010	CG8028	32923	28.96	1943.74	0.0035	0.0035	0.013	0.069	-0.51	0.48	TRUE	FALSE	FALSE	FALSE	0.03	0.12	3e-06	3.5e-05	-1	0.78	1	0.42	1
gut	IV	FBgn0020910	RpL3	41347	34.37	54453.2	0.0089	0.0026	0.028	0.056	-0.22	0.34	TRUE	FALSE	TRUE	FALSE	0.1	0.26	4.6e-05	0.00031	-0.4	0.074	0.63	0.17	1
gut	IV	FBgn0000406	Cyt-b5-r	35008	26.61	1170.63	0.5	1.3e-07	0.62	1.7e-05	-0.16	1.1	TRUE	FALSE	FALSE	FALSE	0.017	0.079	0.0072	0.02	0.68	0.93	1	0.11	1
gut	IV	FBgn0025582	eIF3e	39877	30.68	3485.72	0.01	0.0044	0.031	0.082	-0.26	0.3	TRUE	FALSE	FALSE	FALSE	0.052	0.17	1.8e-05	0.00015	-0.53	0.3	0.95	0.0085	0.52
gut	IV	FBgn0053138	AGBE	326264	27.92	1189.52	0.019	0.0024	0.051	0.053	-0.45	0.42	TRUE	FALSE	FALSE	FALSE	0.2	0.39	0.5	0.61	-0.12	0.48	1	0.061	1
gut	IV	FBgn0043783	CG32444	40406	29.21	3842.61	0.037	0.0027	0.085	0.057	-0.38	0.59	TRUE	FALSE	FALSE	FALSE	0.24	0.43	0.61	0.71	-0.086	0.41	1	0.14	1
gut	IV	FBgn0015805	HDAC1	38565	24.62	514.59	0.07	0.0012	0.14	0.03	-0.88	0.46	TRUE	FALSE	FALSE	FALSE	0.68	0.81	0.2	0.3	-0.61	0.46	1	0.14	1
gut	IV	FBgn0033826	CG4734	36477	27.56	5772.98	0.37	0.00013	0.5	0.0052	-0.18	0.65	TRUE	FALSE	FALSE	FALSE	0.031	0.12	0.0005	0.0023	-0.82	0.86	1	0.032	0.84
gut	IV	FBgn0026372	RpL23A	38208	34.69	10492.9	0.58	8.7e-05	0.69	0.0039	-0.064	0.67	TRUE	FALSE	FALSE	FALSE	0.74	0.86	0.92	0.95	-0.011	0.045	0.55	0.22	1
gut	IV	FBgn0051683	CG31683	261623	27.81	2232.22	0.16	0.0056	0.27	0.097	-0.43	0.33	TRUE	FALSE	FALSE	FALSE	0.032	0.12	0.083	0.15	0.54	0.93	1	0.17	1
gut	IV	FBgn0029896	CG3168	31612	28.03	16953.1	0.28	0.0034	0.41	0.067	-0.19	0.76	TRUE	FALSE	FALSE	FALSE	0.0048	0.033	0.0029	0.0096	0.58	0.95	1	0.57	1
gut	IV	FBgn0033518	Prx2540-2	36098	32.05	342.03	0.24	0.0051	0.37	0.09	-0.11	0.63	TRUE	FALSE	FALSE	FALSE	0.0067	0.043	0.0059	0.017	0.29	0.69	1	0.066	1
gut	IV	FBgn0028540	CG9008	34779	24.65	1749.82	0.45	0.0032	0.58	0.065	-0.24	0.51	TRUE	FALSE	FALSE	FALSE	0.46	0.65	0.083	0.15	-0.57	0.49	1	0.75	1
gut	IV	FBgn0028473	Non1	35963	26.7	16154.1	0.44	0.0056	0.57	0.096	-0.15	0.34	TRUE	FALSE	FALSE	FALSE	0.057	0.18	0.0018	0.0065	-0.71	0.78	1	0.029	0.82
gut	IV	FBgn0037135	CG7414	40431	27.91	7328	0.71	0.0011	0.8	0.028	-0.06	0.36	TRUE	FALSE	FALSE	FALSE	0.06	0.18	0.024	0.055	0.4	0.69	1	0.29	1
gut	IV	FBgn0050359	Mal-A5	35828	26.52	138.38	0.96	0.00054	0.98	0.016	-0.024	0.73	TRUE	FALSE	FALSE	FALSE	0.93	0.97	0.95	0.97	0.03	0.33	0.98	0.49	1
brain	I	FBgn0030653	CG7860	32488	28.16	479.75	3e-06	2.4e-14	0.00012	2e-11	0.79	1.5	FALSE	FALSE	FALSE	FALSE	0.21	0.5	0.00012	0.0033	0.58	0.23	0.61	0.081	1
brain	I	FBgn0003996	w	31271	22.72	2308	0.64	9.6e-185	0.75	1e-180	0.14	6.6	FALSE	FALSE	FALSE	TRUE	0.023	0.15	0.00087	0.011	1.2	0.95	1	1.7e-05	0.062
brain	I	FBgn0036290	CG10638	39424	31.23	802.7	1.4e-10	9.8e-05	7.5e-08	0.0084	1.1	0.69	FALSE	FALSE	FALSE	FALSE	0.0028	0.041	1.7e-07	3e-05	0.7	0.73	0.96	0.73	1
brain	I	FBgn0034335	GstE1	37106	27.55	1326.33	3.7e-08	2.7e-05	5.8e-06	0.0034	1.7	0.73	FALSE	TRUE	FALSE	FALSE	1.1e-05	0.00093	0.53	0.71	0.12	1	1	0.14	1
brain	I	FBgn0000071	Ama	40831	29.43	80.92	0.0085	1e-11	0.034	5.8e-09	0.32	1.8	FALSE	FALSE	FALSE	FALSE	0.27	0.56	0.2	0.39	0.14	0.14	0.48	0.39	1
brain	I	FBgn0003748	Treh	45368	29.31	22578.2	4.6e-06	0.0023	0.00015	0.078	0.64	0.34	FALSE	FALSE	FALSE	FALSE	0.035	0.19	0.0045	0.032	0.32	0.43	0.79	0.28	1
brain	I	FBgn0266756	btsz	3346167	22.67	8055.19	0.0021	2.2e-05	0.012	0.0029	0.63	0.77	FALSE	FALSE	FALSE	FALSE	0.093	0.32	0.29	0.5	0.19	0.65	0.93	0.8	1
brain	I	FBgn0260859	Bet3	39090	25.73	656.6	0.35	1.1e-09	0.5	3.7e-07	0.5	0.79	FALSE	FALSE	FALSE	FALSE	0.34	0.63	0.031	0.12	1.2	0.69	0.94	0.07	1
brain	I	FBgn0031285	CG3662	33260	27.8	8232.09	0.0095	9e-05	0.037	0.008	0.32	0.24	FALSE	FALSE	TRUE	FALSE	0.84	0.93	0.005	0.034	0.36	0.033	0.24	0.28	1
brain	I	FBgn0031575	Cep97	33610	26.37	1288.52	0.00064	0.0024	0.005	0.08	0.48	0.27	FALSE	FALSE	FALSE	FALSE	0.077	0.29	0.16	0.34	0.17	0.43	0.79	0.83	1
brain	I	FBgn0261872	scaf6	3346235	23.52	3031.11	0.0023	0.0015	0.013	0.059	1	0.81	FALSE	FALSE	FALSE	FALSE	0.91	0.97	0.0016	0.016	1.1	0.24	0.62	0.0063	1
brain	I	FBgn0010774	Ref1	44029	31.57	1214.55	0.0042	0.0011	0.02	0.048	0.28	0.4	FALSE	FALSE	TRUE	FALSE	0.65	0.83	0.017	0.081	0.23	0.016	0.17	0.56	1
brain	I	FBgn0050035	Tret1-1	36248	27.78	12090	0.067	4.3e-05	0.15	0.0049	0.23	0.4	FALSE	FALSE	FALSE	FALSE	0.42	0.68	0.44	0.64	0.092	0.11	0.43	0.66	1
brain	I	FBgn0039946	ATbp	5740592	24.5	221.82	0.02	0.00075	0.063	0.036	0.82	0.49	FALSE	FALSE	FALSE	FALSE	0.27	0.56	0.35	0.56	0.31	0.65	0.92	0.63	1
brain	I	FBgn0260795	NaPi-III	39255	26.55	8185.7	0.018	0.0032	0.06	0.097	0.3	0.54	FALSE	FALSE	TRUE	FALSE	0.86	0.94	0.011	0.056	0.33	0.035	0.25	0.15	1
brain	I	FBgn0037141	DNApol-eta	40438	22.95	334.15	0.087	0.00046	0.19	0.026	0.61	0.53	FALSE	FALSE	FALSE	FALSE	0.03	0.17	0.14	0.32	-0.52	0.94	1	0.24	1
brain	I	FBgn0011676	Nos	34495	27.76	3608.59	0.051	0.003	0.13	0.095	0.32	0.43	FALSE	FALSE	FALSE	FALSE	0.65	0.83	0.17	0.36	0.22	0.14	0.48	0.022	1
brain	I	FBgn0035171	CG12502	38102	25.78	2596.38	0.11	0.0013	0.23	0.053	0.24	0.41	FALSE	FALSE	FALSE	FALSE	0.43	0.68	0.011	0.06	0.41	0.2	0.57	0.44	1
brain	I	FBgn0035850	Atg18a	38913	25.82	1713.85	0.85	9.2e-07	0.9	0.00019	0.058	0.39	FALSE	FALSE	FALSE	FALSE	0.62	0.81	0.61	0.77	-0.15	0.38	0.75	0.11	1
brain	I	FBgn0035901	CG6745	38969	23.05	213.91	0.64	9.1e-05	0.75	0.0081	0.24	0.69	FALSE	FALSE	FALSE	FALSE	0.55	0.76	0.2	0.39	0.67	0.55	0.86	0.35	1
brain	I	FBgn0264753	Rgk1	14462605	24.57	7472.74	0.5	0.0006	0.64	0.031	0.079	0.7	FALSE	FALSE	FALSE	FALSE	0.3	0.59	0.042	0.14	0.25	0.16	0.51	0.32	1
brain	I	FBgn0051118	RabX4	42960	24.19	659.59	0.52	0.0025	0.65	0.083	0.16	0.36	FALSE	FALSE	FALSE	FALSE	0.033	0.18	0.018	0.082	-0.65	0.9	1	0.79	1
brain	I	FBgn0015520	nonA-l	42026	26.6	831.9	0.85	0.00024	0.9	0.016	0.058	0.43	FALSE	FALSE	FALSE	FALSE	1	1	0.85	0.92	0.057	0.21	0.58	0.069	1
brain	I	FBgn0028554	x16	33967	29.3	1042.84	0.65	0.0033	0.76	0.099	0.068	0.48	FALSE	FALSE	FALSE	FALSE	0.4	0.67	0.11	0.27	0.25	0.22	0.6	0.021	1
brain	II	FBgn0036713	Mip	39933	24.97	2594.34	0.015	1.4e-06	0.052	0.00027	1.4	-0.62	TRUE	FALSE	FALSE	FALSE	0.07	0.27	0.96	0.98	-0.023	0.92	1	0.68	1
brain	II	FBgn0010226	GstS1	36927	29.56	1145.49	0.085	9.5e-07	0.18	0.00019	0.17	-0.46	TRUE	FALSE	FALSE	FALSE	0.031	0.18	0.15	0.34	-0.14	0.39	0.76	0.78	1
brain	II	FBgn0031417	CG3597	33420	25.46	1845.4	0.024	3.1e-05	0.074	0.0038	1.2	-0.79	TRUE	TRUE	FALSE	FALSE	0.0015	0.027	0.011	0.057	-1.4	1	1	0.5	1
brain	II	FBgn0015575	alpha-Est7	40901	29.15	5425.27	0.0048	0.00055	0.022	0.03	0.26	-0.65	TRUE	FALSE	FALSE	FALSE	0.033	0.18	0.96	0.98	-0.0046	0.27	0.65	0.15	1
brain	II	FBgn0002526	LanA	38723	31.69	4689.49	0.0016	0.0024	0.0099	0.08	0.22	-0.48	TRUE	FALSE	TRUE	FALSE	0.96	0.98	0.0014	0.015	0.23	0.00044	0.064	0.97	1
brain	II	FBgn0032774	CG17549	35212	25.45	1612.86	0.0022	0.0021	0.013	0.074	1.8	-0.48	TRUE	FALSE	FALSE	FALSE	0.049	0.23	0.57	0.74	0.3	0.94	1	0.081	1
brain	II	FBgn0036145	CG7607	39263	27.02	3864.83	0.068	2.6e-05	0.16	0.0034	0.25	-0.82	TRUE	FALSE	FALSE	FALSE	0.8	0.91	0.13	0.31	0.2	0.061	0.32	0.83	1
brain	II	FBgn0000715	FMRFa	36030	29.03	731.81	0.0038	0.0029	0.019	0.091	0.37	-0.49	TRUE	FALSE	FALSE	FALSE	0.16	0.44	0.22	0.41	0.14	0.24	0.61	0.022	1
brain	II	FBgn0035206	CG9186	38150	26.03	913.14	0.1	3.2e-05	0.21	0.0039	0.4	-0.62	TRUE	FALSE	FALSE	FALSE	0.4	0.67	0.63	0.78	0.12	0.44	0.79	0.013	1
brain	II	FBgn0031418	CG3609	33421	30.23	502.92	0.11	3.2e-05	0.22	0.0038	0.15	-0.76	TRUE	FALSE	FALSE	FALSE	4.5e-05	0.0027	1.5e-05	0.00074	-0.51	0.99	1	0.75	1
brain	II	FBgn0013763	Idgf6	36868	31.25	10448.2	0.016	0.0021	0.055	0.074	0.44	-0.47	TRUE	FALSE	TRUE	FALSE	0.97	0.98	0.014	0.071	0.45	0.087	0.38	0.13	1
brain	II	FBgn0037723	SpdS	41167	27.57	1570.34	0.038	0.00086	0.1	0.04	0.32	-0.68	TRUE	FALSE	FALSE	FALSE	0.024	0.15	0.23	0.43	-0.18	0.77	0.98	0.27	1
brain	II	FBgn0012036	Aldh	34256	33.95	17401.6	0.056	0.00058	0.14	0.031	0.11	-0.61	TRUE	FALSE	FALSE	FALSE	0.37	0.65	0.47	0.66	0.041	0.0016	0.081	0.47	1
brain	II	FBgn0010225	Gel	46008	28.93	15434.1	0.66	1.4e-07	0.76	3.3e-05	0.07	-0.45	TRUE	FALSE	FALSE	FALSE	0.86	0.94	0.84	0.92	0.031	0.093	0.39	0.081	1
brain	II	FBgn0037607	CG8036	41027	31.74	4445.85	0.15	0.00012	0.28	0.01	0.14	-0.49	TRUE	FALSE	FALSE	FALSE	1.1e-05	0.00097	1.6e-06	0.00016	-0.64	1	1	0.17	1
brain	II	FBgn0036975	CG5618	40241	24.12	1805.63	0.25	5.4e-05	0.4	0.0057	0.55	-0.66	TRUE	FALSE	FALSE	FALSE	0.001	0.02	0.00037	0.006	-2.1	1	1	0.16	1
brain	II	FBgn0032889	CG9331	35347	30.65	1109.02	0.19	0.00018	0.33	0.013	0.14	-0.53	TRUE	FALSE	FALSE	FALSE	4.3e-05	0.0027	7.2e-06	0.0005	-0.66	1	1	0.8	1
brain	II	FBgn0025683	CG3164	33171	27.44	10667.1	0.14	0.00057	0.26	0.03	0.12	-0.46	TRUE	FALSE	FALSE	FALSE	0.3	0.59	0.96	0.98	0.0039	0.033	0.24	0.67	1
brain	II	FBgn0017430	Nelf-E	38982	25.51	468.48	0.51	3.8e-05	0.65	0.0044	0.45	-0.53	TRUE	FALSE	FALSE	FALSE	1	1	0.51	0.7	0.44	0.36	0.74	0.78	1
brain	II	FBgn0038038	CG5167	41521	29.25	2267.08	0.29	0.00042	0.45	0.024	0.12	-0.6	TRUE	FALSE	FALSE	FALSE	0.63	0.81	0.093	0.25	0.2	0.059	0.31	0.11	1
brain	II	FBgn0260960	Baldspot	39860	26.41	5737.91	0.28	0.00063	0.44	0.032	0.24	-0.58	TRUE	FALSE	FALSE	FALSE	0.93	0.97	0.34	0.54	0.22	0.16	0.51	0.87	1
brain	II	FBgn0031571	bark	33604	22.59	779.48	0.6	8.8e-05	0.72	0.008	0.19	-0.47	TRUE	FALSE	FALSE	FALSE	0.48	0.72	0.14	0.32	0.55	0.52	0.84	0.17	1
brain	II	FBgn0031808	CG9507	33892	25.64	2582.68	0.57	0.0011	0.69	0.048	0.088	-0.49	TRUE	FALSE	FALSE	FALSE	0.8	0.91	0.82	0.91	0.034	0.097	0.4	0.71	1
brain	II	FBgn0039827	CG1544	43689	26.86	925.87	0.78	0.00014	0.85	0.011	0.058	-0.69	TRUE	FALSE	FALSE	FALSE	0.43	0.69	0.4	0.61	-0.17	0.35	0.73	0.66	1
brain	II	FBgn0027930	MP1	40541	23.09	1657.39	0.6	0.0012	0.72	0.05	0.27	-0.63	TRUE	FALSE	FALSE	FALSE	0.49	0.73	0.65	0.8	-0.23	0.59	0.89	0.55	1
brain	II	FBgn0010408	RpS9	39108	30.87	29323.7	0.61	0.0018	0.73	0.068	0.036	-0.59	TRUE	FALSE	FALSE	FALSE	0.011	0.095	0.0025	0.022	-0.24	0.26	0.64	0.76	1
brain	II	FBgn0053470	CG33470	2768831	28.95	3557.62	0.68	0.0013	0.78	0.054	0.12	-0.77	TRUE	FALSE	FALSE	FALSE	0.85	0.94	0.5	0.69	0.2	0.27	0.64	0.019	1
brain	II	FBgn0004047	Yp3	32339	34.79	380862	0.86	0.00016	0.91	0.012	0.055	-0.74	TRUE	FALSE	FALSE	FALSE	0.51	0.74	0.44	0.64	-0.25	0.47	0.81	0.95	1
brain	II	FBgn0035189	CG9119	38124	23.53	407.84	0.81	0.00047	0.88	0.026	0.12	-0.69	TRUE	FALSE	FALSE	FALSE	0.073	0.28	0.025	0.1	-1.2	0.91	1	0.062	1
brain	II	FBgn0039774	CDase	43618	27.57	4384.66	0.74	0.0033	0.82	0.099	0.044	-0.49	TRUE	FALSE	FALSE	FALSE	0.98	0.99	0.77	0.88	0.039	0.043	0.27	0.43	1
brain	II	FBgn0033631	Sod3	36232	29.68	1702.37	0.85	0.0024	0.9	0.081	0.041	-0.37	TRUE	FALSE	FALSE	FALSE	0.57	0.78	0.54	0.71	-0.13	0.29	0.67	0.06	1
brain	III	FBgn0044050	Ilp3	39151	24.65	533.13	2.6e-07	1.7e-132	2.3e-05	9.5e-129	-3.2	-5.5	FALSE	FALSE	FALSE	FALSE	0.83	0.93	4.6e-07	6.8e-05	-3.1	0.35	0.73	0.068	1
brain	III	FBgn0044048	Ilp5	2768992	24.1	356.25	1.8e-06	4.3e-93	8.3e-05	1.2e-89	-3	-4.9	FALSE	FALSE	FALSE	FALSE	0.71	0.86	6.5e-07	8.6e-05	-3.2	0.43	0.79	0.022	1
brain	III	FBgn0017561	Ork1	32020	28.57	1157.68	9.2e-05	7.7e-10	0.0012	2.7e-07	-0.4	-0.7	FALSE	FALSE	TRUE	FALSE	0.45	0.7	9.4e-06	0.00057	-0.49	0.02	0.19	0.49	1
brain	III	FBgn0036208	CG10361	39333	29.39	669.35	1.5e-10	0.001	7.5e-08	0.046	-1.2	-0.6	FALSE	FALSE	FALSE	FALSE	0.025	0.16	1.7e-08	5.3e-06	-0.85	0.39	0.75	0.7	1
brain	III	FBgn0035280	Cpr62Bb	38240	29.66	84.13	0.00017	1.5e-08	0.0018	4.2e-06	-0.93	-1.3	FALSE	FALSE	FALSE	FALSE	0.23	0.52	0.0078	0.046	-0.59	0.5	0.83	0.37	1
brain	III	FBgn0027584	CG4757	41330	23.42	403.66	0.0048	7.2e-09	0.022	2.1e-06	-1.3	-1.5	FALSE	FALSE	FALSE	FALSE	0.74	0.88	0.0017	0.017	-1.5	0.41	0.77	0.12	1
brain	III	FBgn0037930	CG14715	41403	27.19	392.37	1.3e-07	0.001	1.4e-05	0.047	-0.82	-0.58	FALSE	FALSE	FALSE	FALSE	0.013	0.11	3.9e-10	2.6e-07	-1.2	0.62	0.91	0.69	1
brain	III	FBgn0004513	Mdr65	38726	31.47	7333.07	4.6e-05	2.7e-05	0.0007	0.0034	-0.39	-0.4	FALSE	FALSE	TRUE	FALSE	0.15	0.41	6.7e-07	8.6e-05	-0.54	0.043	0.27	0.34	1
brain	III	FBgn0032507	CG9377	34743	24.38	5531.88	0.00053	1.8e-06	0.0044	0.00034	-2.2	-1.1	FALSE	FALSE	FALSE	FALSE	0.26	0.55	0.019	0.086	-1.3	0.75	0.97	0.027	1
brain	III	FBgn0036622	CG4753	39819	23.77	508.02	2.6e-05	0.00025	0.0005	0.016	-1.2	-0.93	FALSE	FALSE	FALSE	FALSE	0.0032	0.045	0.43	0.63	-0.17	0.98	1	0.18	1
brain	III	FBgn0030796	CG4829	32672	31.04	1709.63	2.7e-05	0.00032	0.0005	0.019	-0.43	-0.68	FALSE	FALSE	TRUE	FALSE	0.9	0.96	3.9e-05	0.0014	-0.41	0.0037	0.1	0.16	1
brain	III	FBgn0038946	rdhB	42614	27.25	1115.15	3.4e-05	0.00028	0.0006	0.018	-2.4	-0.77	FALSE	FALSE	FALSE	FALSE	0.11	0.35	0.0059	0.038	-1.4	0.86	1	0.8	1
brain	III	FBgn0035090	CG2736	37998	25.33	6217.24	0.008	9e-07	0.033	0.00019	-0.7	-0.78	FALSE	FALSE	FALSE	FALSE	0.38	0.65	0.00048	0.0072	-1	0.45	0.8	0.1	1
brain	III	FBgn0022355	Tsf1	32821	33.22	42458.1	0.00052	7.5e-05	0.0044	0.0071	-0.61	-0.57	FALSE	FALSE	TRUE	FALSE	0.78	0.9	0.00021	0.0043	-0.67	0.093	0.39	0.19	1
brain	III	FBgn0027528	goe	32660	26.56	1401.35	1.4e-05	0.0021	0.00033	0.074	-1.3	-0.32	FALSE	FALSE	FALSE	FALSE	0.0029	0.042	0.31	0.52	-0.23	0.99	1	0.51	1
brain	III	FBgn0033093	CG3270	35575	29.07	1735.32	0.00016	0.00029	0.0018	0.018	-0.48	-0.58	FALSE	FALSE	FALSE	FALSE	0.093	0.32	1e-06	0.00011	-0.73	0.27	0.64	0.93	1
brain	III	FBgn0033101	CG9436	35586	29.04	923.24	0.00043	0.00021	0.0038	0.015	-0.47	-0.73	FALSE	FALSE	FALSE	FALSE	0.0016	0.028	2e-08	5.8e-06	-1	0.93	1	0.5	1
brain	III	FBgn0032494	CG5945	34729	24.29	674.99	0.00035	0.0003	0.0031	0.019	-2	-0.61	FALSE	TRUE	FALSE	FALSE	0.00081	0.018	0.22	0.41	0.59	1	1	0.42	1
brain	III	FBgn0026403	Ndg	36089	27.97	704.63	0.0016	5.6e-05	0.0099	0.0058	-0.41	-0.6	FALSE	FALSE	FALSE	FALSE	0.39	0.67	0.023	0.097	-0.27	0.1	0.41	0.94	1
brain	III	FBgn0033696	Cyp6g2	36317	24.39	2424.89	0.00056	0.00022	0.0045	0.015	-1.2	-0.91	FALSE	FALSE	FALSE	FALSE	0.16	0.44	7.2e-06	0.0005	-1.7	0.72	0.95	0.59	1
brain	III	FBgn0001089	Gal	33839	26.06	1121.77	0.0054	1.4e-05	0.025	0.0019	-0.52	-0.51	FALSE	FALSE	FALSE	FALSE	0.47	0.71	0.048	0.16	-0.35	0.24	0.61	0.74	1
brain	III	FBgn0037975	CG3397	41454	23.69	274.63	0.0014	9.3e-05	0.0092	0.0081	-1.6	-1	FALSE	FALSE	FALSE	FALSE	0.07	0.27	0.31	0.52	-0.43	0.9	1	0.13	1
brain	III	FBgn0015623	Cpr	33883	30.35	4553.75	0.00015	0.001	0.0016	0.047	-0.41	-0.34	FALSE	FALSE	TRUE	FALSE	0.6	0.79	0.00077	0.01	-0.34	0.016	0.18	0.44	1
brain	III	FBgn0261575	tobi	43072	24	1816.95	0.0021	7.3e-05	0.012	0.007	-1.3	-1	FALSE	FALSE	FALSE	FALSE	0.32	0.61	9e-05	0.0026	-1.9	0.64	0.92	0.65	1
brain	III	FBgn0035515	CG14997	38514	28.66	856.48	0.0001	0.0018	0.0013	0.069	-0.47	-0.49	FALSE	FALSE	TRUE	FALSE	0.68	0.85	0.00037	0.006	-0.41	0.024	0.2	0.49	1
brain	III	FBgn0030347	CG15739	32146	24.14	211.34	0.0011	0.00043	0.0073	0.025	-2.3	-0.57	FALSE	FALSE	FALSE	FALSE	0.02	0.14	0.77	0.88	-0.18	0.98	1	0.45	1
brain	III	FBgn0025878	wrapper	37555	26.92	2126.14	0.0027	0.00031	0.015	0.019	-0.31	-0.5	FALSE	FALSE	FALSE	FALSE	0.14	0.41	0.2	0.39	-0.12	0.13	0.46	0.75	1
brain	III	FBgn0086254	CG6084	39304	33	3780.85	0.0035	0.00024	0.018	0.016	-0.22	-0.67	FALSE	FALSE	TRUE	FALSE	0.85	0.94	0.0064	0.04	-0.2	0.0012	0.075	0.56	1
brain	III	FBgn0028573	prc	43930	26.7	103.51	0.007	0.00011	0.029	0.0093	-0.46	-0.81	FALSE	FALSE	FALSE	FALSE	0.35	0.63	0.00036	0.0059	-0.66	0.26	0.64	0.66	1
brain	III	FBgn0010246	Myo61F	38153	22.91	484.49	0.6	4.6e-10	0.72	1.7e-07	-0.39	-0.88	FALSE	FALSE	FALSE	FALSE	0.65	0.83	0.91	0.95	0.088	0.55	0.86	0.26	1
brain	III	FBgn0033730	Cpr49Ag	36353	27.39	11.89	0.0016	0.0019	0.0097	0.069	-4.3	-0.73	FALSE	FALSE	FALSE	FALSE	0.0033	0.046	0.3	0.51	1.2	1	1	0.59	1
brain	III	FBgn0011722	Tig	33896	25.45	3043.57	0.018	0.00016	0.059	0.012	-0.62	-0.62	FALSE	FALSE	FALSE	FALSE	0.16	0.44	0.58	0.75	-0.13	0.67	0.93	0.54	1
brain	III	FBgn0044328	CG32052	326184	23.59	888.16	0.0071	0.00092	0.03	0.043	-1.9	-0.64	FALSE	FALSE	FALSE	FALSE	0.18	0.46	9.5e-05	0.0028	-3.2	0.84	1	0.78	1
brain	III	FBgn0010548	Aldh-III	45398	29.17	3879.95	0.019	0.00049	0.06	0.027	-0.21	-0.33	FALSE	FALSE	TRUE	FALSE	0.36	0.64	0.23	0.42	-0.1	0.027	0.22	0.67	1
brain	III	FBgn0024289	Sodh-1	40836	28.41	1038.36	0.017	0.0016	0.056	0.062	-0.31	-0.68	FALSE	FALSE	FALSE	FALSE	0.00054	0.014	1e-07	1.9e-05	-1	0.98	1	0.82	1
brain	III	FBgn0027843	CAH2	39390	25.59	678.41	0.017	0.0015	0.058	0.06	-0.47	-0.73	FALSE	FALSE	FALSE	FALSE	0.084	0.3	0.97	0.99	-0.0058	0.69	0.94	0.48	1
brain	III	FBgn0038916	dnd	42580	25.75	132.67	0.27	4.2e-06	0.42	0.0007	-0.23	-0.93	FALSE	FALSE	FALSE	FALSE	0.21	0.49	0.0078	0.046	-0.59	0.54	0.85	0.9	1
brain	III	FBgn0034718	wdp	37548	28.02	1161.52	0.043	0.00045	0.11	0.025	-0.28	-0.68	FALSE	FALSE	FALSE	FALSE	0.077	0.29	0.64	0.79	0.059	0.49	0.82	0.14	1
brain	III	FBgn0033320	CG8586	35854	24.16	3504.3	0.1	0.00011	0.21	0.0093	-0.59	-0.65	FALSE	FALSE	FALSE	FALSE	0.94	0.98	0.12	0.3	-0.55	0.27	0.65	0.1	1
brain	III	FBgn0003137	Ppn	43872	28.42	23050.7	0.076	0.00023	0.17	0.015	-0.21	-0.51	FALSE	FALSE	FALSE	FALSE	0.46	0.71	0.42	0.63	-0.089	0.081	0.37	0.4	1
brain	III	FBgn0002937	ninaB	41678	23.37	3136.29	0.047	0.00067	0.12	0.034	-0.82	-0.42	FALSE	FALSE	FALSE	FALSE	0.35	0.63	0.0026	0.023	-1.3	0.63	0.91	0.011	1
brain	III	FBgn0010611	Hmgs	44154	23.45	2270.16	0.23	2.3e-05	0.38	0.0031	-0.78	-0.57	FALSE	FALSE	FALSE	FALSE	0.36	0.64	0.019	0.087	-1.6	0.71	0.95	0.086	1
brain	III	FBgn0043783	CG32444	40406	26.38	4175.74	0.3	1.1e-05	0.45	0.0015	-0.34	-1	FALSE	FALSE	FALSE	FALSE	0.026	0.16	0.00028	0.0052	-1.4	0.94	1	0.77	1
brain	III	FBgn0037819	CG14688	41275	25.57	3096.69	0.032	0.0025	0.09	0.082	-0.41	-0.62	FALSE	FALSE	FALSE	FALSE	0.46	0.71	0.22	0.42	-0.22	0.27	0.65	0.86	1
brain	III	FBgn0036258	eIF3l	39386	24.82	5107.3	0.1	0.00051	0.21	0.028	-1.1	-0.47	FALSE	FALSE	FALSE	FALSE	0.43	0.69	0.57	0.74	-0.36	0.66	0.93	0.16	1
brain	III	FBgn0033763	CG8646	36394	24.83	174.62	0.064	0.0029	0.15	0.091	-0.5	-0.61	FALSE	FALSE	FALSE	FALSE	0.48	0.72	0.36	0.56	-0.24	0.41	0.77	0.62	1
brain	III	FBgn0004057	Zw	32974	24.16	246.55	0.23	0.00022	0.38	0.015	-0.37	-0.71	FALSE	FALSE	FALSE	FALSE	0.64	0.82	0.072	0.21	-0.57	0.37	0.75	0.48	1
brain	III	FBgn0040582	CG5791	50055	24.44	232.29	0.084	0.0032	0.18	0.097	-0.56	-0.78	FALSE	FALSE	FALSE	FALSE	0.83	0.93	0.15	0.33	-0.46	0.29	0.67	0.16	1
brain	III	FBgn0025885	Inos	35671	31.36	11282.7	0.19	0.00068	0.33	0.034	-0.095	-0.56	FALSE	FALSE	FALSE	FALSE	4.5e-06	0.00064	4.8e-09	2.4e-06	-0.74	1	1	0.52	1
brain	III	FBgn0040349	CG3699	31046	28.14	274.11	0.64	6.1e-06	0.75	0.00094	-0.14	-1	FALSE	FALSE	FALSE	FALSE	0.00013	0.0061	9.1e-07	0.0001	-2.2	1	1	0.24	1
brain	III	FBgn0036857	CG9629	40097	31.05	2415.51	0.23	0.00074	0.38	0.036	-0.11	-0.57	FALSE	FALSE	FALSE	FALSE	0.92	0.97	0.18	0.37	-0.12	0.0072	0.13	0.61	1
brain	III	FBgn0036551	CG17029	39740	27.27	673.84	0.13	0.0032	0.26	0.097	-0.48	-0.46	FALSE	FALSE	FALSE	FALSE	0.21	0.5	0.79	0.89	0.085	0.7	0.94	0.2	1
brain	III	FBgn0003890	betaTub97EF	43359	30.8	2186.04	0.18	0.0018	0.32	0.068	-0.094	-0.44	FALSE	FALSE	FALSE	FALSE	0.37	0.65	0.015	0.073	-0.18	0.008	0.14	0.079	1
brain	III	FBgn0035231	Pcyt2	38180	23.03	4069.58	0.22	0.0013	0.37	0.053	-0.51	-0.32	FALSE	FALSE	FALSE	FALSE	0.7	0.86	0.5	0.69	-0.28	0.42	0.78	0.62	1
brain	III	FBgn0027572	CG5009	37028	26.27	3163.63	0.27	0.0008	0.43	0.038	-0.29	-0.52	FALSE	FALSE	FALSE	FALSE	0.37	0.65	0.87	0.94	0.043	0.5	0.82	0.32	1
brain	III	FBgn0004654	Pgd	31185	28.56	2892.97	0.46	0.00016	0.6	0.012	-0.099	-0.75	FALSE	FALSE	FALSE	FALSE	0.006	0.068	6.7e-05	0.0022	-0.67	0.89	1	0.32	1
brain	III	FBgn0038738	CG4572	42360	27.87	1298.44	0.32	0.00063	0.47	0.032	-0.1	-0.45	FALSE	FALSE	FALSE	FALSE	0.21	0.5	0.01	0.056	-0.28	0.12	0.45	0.21	1
brain	III	FBgn0034229	CG4847	36973	27.85	2933.6	0.62	9.6e-05	0.73	0.0083	-0.15	-0.69	FALSE	FALSE	FALSE	FALSE	0.84	0.93	0.83	0.92	-0.066	0.28	0.66	0.073	1
brain	III	FBgn0029950	CG9657	31674	24.76	5208.23	0.3	0.0019	0.46	0.069	-0.23	-0.51	FALSE	FALSE	FALSE	FALSE	0.23	0.52	0.49	0.68	0.16	0.56	0.87	0.9	1
brain	III	FBgn0250848	26-29-p	39547	28.89	4589.89	0.29	0.0029	0.45	0.091	-0.12	-0.39	FALSE	FALSE	FALSE	FALSE	0.38	0.65	0.85	0.92	0.021	0.098	0.4	0.053	1
brain	III	FBgn0041630	Hexo1	38528	24.09	1678.15	0.42	0.0011	0.57	0.048	-0.46	-0.46	FALSE	FALSE	FALSE	FALSE	1	1	0.42	0.63	-0.46	0.34	0.72	0.17	1
brain	III	FBgn0262057	Spn77Ba	40234	23.95	1290.34	0.42	0.0016	0.57	0.062	-0.22	-0.52	FALSE	FALSE	FALSE	FALSE	0.57	0.78	0.12	0.28	-0.45	0.38	0.75	0.32	1
brain	III	FBgn0266369	Mtp	35362	28.38	2396.25	0.37	0.0031	0.52	0.096	-0.094	-0.4	FALSE	FALSE	FALSE	FALSE	0.37	0.64	0.039	0.14	-0.23	0.085	0.38	0.069	1
brain	III	FBgn0000442	Pkg21D	33253	22.62	302	0.9	1e-05	0.94	0.0015	-0.077	-0.82	FALSE	FALSE	FALSE	FALSE	0.93	0.97	0.79	0.9	-0.15	0.38	0.75	0.13	1
brain	III	FBgn0035484	CG11594	38473	23.12	2112.52	0.55	0.00092	0.68	0.043	-0.27	-0.6	FALSE	FALSE	FALSE	FALSE	0.073	0.28	0.004	0.03	-1.5	0.9	1	0.46	1
brain	III	FBgn0016123	Alp4	43671	24.63	2553.89	0.8	6.3e-05	0.87	0.0065	-0.088	-0.54	FALSE	FALSE	FALSE	FALSE	0.27	0.56	0.19	0.39	0.47	0.67	0.93	0.57	1
brain	III	FBgn0003888	betaTub60D	37888	23.76	344.74	0.57	0.0022	0.69	0.077	-0.34	-0.52	FALSE	FALSE	FALSE	FALSE	0.16	0.44	0.017	0.078	-1.5	0.85	1	0.8	1
brain	III	FBgn0038198	Npc2b	41710	21.38	717.13	0.57	0.0031	0.7	0.096	-0.35	-0.65	FALSE	FALSE	FALSE	FALSE	0.73	0.87	0.3	0.5	-0.65	0.48	0.81	0.31	1
brain	III	FBgn0014141	cher	42066	29.71	2266.17	0.65	0.0019	0.76	0.069	-0.045	-0.51	FALSE	FALSE	FALSE	FALSE	0.97	0.99	0.61	0.77	-0.051	0.013	0.16	0.15	1
brain	III	FBgn0041194	Prat2	38753	27.8	4177.22	0.71	0.0012	0.8	0.053	-0.053	-0.76	FALSE	FALSE	FALSE	FALSE	0.0098	0.091	0.00031	0.0054	-0.62	0.87	1	0.76	1
brain	III	FBgn0032835	CG16772	35281	23.07	95.27	0.66	0.0023	0.77	0.078	-0.27	-0.81	FALSE	FALSE	FALSE	FALSE	0.75	0.88	0.38	0.58	-0.56	0.48	0.81	0.21	1
brain	III	FBgn0027586	CG5867	34728	29.56	3245.04	0.82	0.0027	0.88	0.089	-0.031	-0.58	FALSE	FALSE	FALSE	FALSE	0.33	0.62	0.12	0.29	-0.22	0.21	0.58	0.72	1
brain	III	FBgn0030731	Mfe2	32582	29.64	3500.24	0.89	0.0025	0.93	0.082	-0.018	-0.39	FALSE	FALSE	FALSE	FALSE	0.43	0.68	0.21	0.41	-0.17	0.16	0.5	0.085	1
brain	IV	FBgn0264489	CG43897	39153	24.5	582.08	0.00033	4.2e-21	0.0031	5.1e-18	-2.6	1.6	TRUE	FALSE	FALSE	FALSE	0.02	0.14	0.43	0.63	-0.47	0.98	1	0.72	1
brain	IV	FBgn0000045	Act79B	40444	24.83	574.81	6.6e-05	7.4e-12	0.00091	4.5e-09	-1.9	1.3	TRUE	FALSE	FALSE	FALSE	0.0067	0.073	0.41	0.62	-0.31	0.99	1	0.57	1
brain	IV	FBgn0031940	CG7214	34053	29.93	10.3	4.8e-07	0.00055	3.6e-05	0.029	-3.8	0.83	TRUE	TRUE	FALSE	FALSE	6.2e-06	0.0007	0.22	0.42	0.62	1	1	0.077	1
brain	IV	FBgn0035512	Cpr64Ac	38510	25.76	5.32	1.8e-05	0.00014	0.00039	0.011	-3.8	0.96	TRUE	TRUE	FALSE	FALSE	1.6e-05	0.0013	0.023	0.097	1.6	1	1	0.32	1
brain	IV	FBgn0262728	Pal2	37746	29.04	7047.68	0.0034	0.0016	0.018	0.064	-0.3	0.34	TRUE	FALSE	FALSE	FALSE	0.013	0.11	0.6	0.76	0.047	0.51	0.83	0.34	1
brain	IV	FBgn0036028	CG16717	39129	24.64	309.77	0.012	0.00036	0.045	0.022	-0.51	0.45	TRUE	FALSE	FALSE	FALSE	0.011	0.095	0.22	0.42	0.23	0.93	1	0.87	1
brain	IV	FBgn0027296	temp	31212	22.67	2026.66	0.59	0.00074	0.71	0.036	-0.18	0.41	TRUE	FALSE	FALSE	FALSE	0.79	0.9	0.36	0.57	-0.31	0.33	0.72	0.76	1
brain	IV	FBgn0035236	CG12004	38185	25.07	3321.27	0.91	0.00046	0.94	0.026	-0.059	0.28	TRUE	FALSE	FALSE	FALSE	0.41	0.68	0.29	0.5	0.55	0.64	0.92	0.022	1
brain	IV	FBgn0036107	galla-2	39221	27.16	219.47	0.92	0.0021	0.95	0.073	-0.017	0.5	TRUE	FALSE	FALSE	FALSE	0.59	0.79	0.39	0.59	-0.15	0.19	0.55	0.59	1
thorax	I	FBgn0000044	Act57B	37368	31.8	10357.9	0.31	4.8e-25	0.54	3.4e-22	0.28	1.1	FALSE	FALSE	FALSE	FALSE	0.35	0.68	0.77	0.89	-0.075	0.52	0.97	0.98	1
thorax	I	FBgn0000047	Act88F	41885	38.95	3342.03	0.41	4.8e-82	0.64	4.8e-78	0.059	2.1	FALSE	FALSE	FALSE	FALSE	0.27	0.6	0.45	0.68	-0.052	0.015	0.7	0.77	1
thorax	I	FBgn0265045	Strn-Mlck	36753	32.44	30957.7	0.0051	2.8e-14	0.057	5e-12	1.5	1.1	FALSE	FALSE	FALSE	FALSE	0.18	0.52	0.19	0.42	0.6	0.8	1	0.29	1
thorax	I	FBgn0036365	cmb	39513	29.85	1230.64	0.011	1.3e-14	0.083	2.5e-12	0.48	0.81	FALSE	FALSE	FALSE	FALSE	0.46	0.75	0.00069	0.011	0.65	0.24	0.97	0.8	1
thorax	I	FBgn0031037	CG14207	32955	35.65	3608.65	0.026	6.7e-14	0.14	1.1e-11	0.23	0.63	FALSE	FALSE	FALSE	FALSE	0.65	0.86	0.0046	0.04	0.28	0.02	0.71	0.67	1
thorax	I	FBgn0262483	Rbp		24.87	378.27	0.041	1e-13	0.18	1.7e-11	1.5	0.99	FALSE	FALSE	FALSE	FALSE	0.049	0.29	0.47	0.7	-0.49	0.95	1	0.78	1
thorax	I	FBgn0039737	CG7920	43562	36.51	24033.1	0.00086	7e-09	0.018	3.6e-07	0.42	0.6	FALSE	FALSE	FALSE	FALSE	0.0043	0.11	0.61	0.8	-0.051	0.81	1	0.0013	0.27
thorax	I	FBgn0086708	stv	39518	26.14	1833.57	0.00022	3.5e-07	0.0093	1.1e-05	1.9	1	FALSE	FALSE	FALSE	FALSE	0.0091	0.14	0.5	0.73	0.26	0.98	1	0.1	1
thorax	I	FBgn0000083	AnxB9	42492	30.81	6910.76	0.00043	1.4e-07	0.012	4.7e-06	0.52	0.35	FALSE	FALSE	FALSE	FALSE	0.019	0.18	0.41	0.66	0.095	0.69	0.99	0.006	0.71
thorax	I	FBgn0260442	rhea	38978	33.96	11903.8	0.15	6.3e-14	0.36	1.1e-11	0.12	0.54	FALSE	FALSE	FALSE	FALSE	0.97	0.99	0.11	0.31	0.13	0.0039	0.7	0.71	1
thorax	I	FBgn0264695	Mhc	35007	27.88	55063.9	0.0012	4.1e-07	0.023	1.2e-05	3.6	0.71	FALSE	FALSE	FALSE	FALSE	0.11	0.42	0.11	0.3	1.5	0.91	1	0.66	1
thorax	I	FBgn0041342	Pcyt1	117353	25.94	5680.96	0.21	1e-12	0.44	1.4e-10	1.1	0.61	FALSE	FALSE	FALSE	FALSE	0.17	0.52	0.5	0.72	-0.55	0.86	1	0.0014	0.29
thorax	I	FBgn0036290	CG10638	39424	31.37	743.96	0.00072	1.8e-06	0.017	4.4e-05	0.6	0.69	FALSE	FALSE	FALSE	FALSE	0.33	0.66	0.0097	0.065	0.4	0.24	0.97	0.26	1
thorax	I	FBgn0036053	iPLA2-VIA	39160	25.34	3231.78	0.62	3.2e-16	0.79	7.8e-14	0.22	0.65	FALSE	FALSE	FALSE	FALSE	0.48	0.77	0.13	0.34	0.66	0.56	0.97	1	1
thorax	I	FBgn0261458	capt	45233	32.68	2106.85	0.00023	2.1e-05	0.0094	0.00036	0.64	0.37	FALSE	FALSE	FALSE	FALSE	0.58	0.83	0.00071	0.012	0.53	0.11	0.9	0.49	1
thorax	I	FBgn0265935	coro	35596	29.89	3376.98	0.081	2.9e-10	0.26	2.1e-08	0.42	0.58	FALSE	FALSE	FALSE	FALSE	0.42	0.73	0.45	0.68	0.17	0.4	0.97	0.39	1
thorax	I	FBgn0010015	CanA1	43670	25.31	545.23	0.37	2.4e-12	0.6	3e-10	0.48	0.8	FALSE	FALSE	FALSE	FALSE	0.013	0.16	0.0069	0.053	-1.5	0.98	1	0.42	1
thorax	I	FBgn0034618	CG9485	37435	32.54	7009.23	0.037	7.6e-08	0.17	2.9e-06	0.23	0.49	FALSE	FALSE	FALSE	FALSE	0.0009	0.054	0.003	0.029	-0.34	0.94	1	0.45	1
thorax	I	FBgn0085447	sif	43892	24.89	1324.21	0.24	3e-10	0.47	2.2e-08	0.74	0.71	FALSE	FALSE	FALSE	FALSE	0.033	0.24	0.052	0.19	-1.2	0.96	1	0.16	1
thorax	I	FBgn0036272	Sms	39403	25.84	1045.17	0.46	5.3e-12	0.68	6.2e-10	0.41	0.65	FALSE	FALSE	FALSE	FALSE	0.7	0.89	0.19	0.42	0.7	0.47	0.97	0.7	1
thorax	I	FBgn0040211	hgo	34552	25.57	2794.03	0.077	2.8e-08	0.25	1.2e-06	1.7	0.78	FALSE	FALSE	FALSE	FALSE	0.55	0.81	0.29	0.54	0.92	0.63	0.99	0.31	1
thorax	I	FBgn0037801	CG3999	41253	28.71	795.59	1.1e-06	0.023	0.00022	0.092	1.2	0.3	FALSE	FALSE	FALSE	FALSE	0.17	0.51	1.9e-08	4.7e-06	1.6	0.47	0.97	0.68	1
thorax	I	FBgn0014427	CG11899	46391	30.36	2803.59	0.0041	3.9e-05	0.049	0.0006	1	0.5	FALSE	FALSE	FALSE	FALSE	0.71	0.89	0.00081	0.013	1.2	0.34	0.97	0.67	1
thorax	I	FBgn0262742	Fas1	42025	33.49	2267.27	0.0035	5.6e-05	0.045	0.00082	0.33	0.45	FALSE	FALSE	TRUE	FALSE	0.86	0.95	0.0013	0.017	0.35	0.014	0.7	0.35	1
thorax	I	FBgn0035498	Fit1	38488	30.48	2860.9	0.61	2.1e-11	0.78	2.2e-09	0.076	0.51	FALSE	FALSE	FALSE	FALSE	0.59	0.83	0.81	0.91	-0.033	0.13	0.92	0.074	1
thorax	I	FBgn0034497	Mpcp1	37297	34.27	9251.32	0.48	1.8e-10	0.69	1.4e-08	0.076	0.66	FALSE	FALSE	FALSE	FALSE	0.061	0.32	0.045	0.18	-0.22	0.38	0.97	0.099	1
thorax	I	FBgn0040985	CG6115	50459	28.61	3221.63	0.015	1.8e-05	0.1	0.0003	0.62	0.64	FALSE	FALSE	FALSE	FALSE	0.9	0.97	0.0071	0.054	0.66	0.18	0.94	0.36	1
thorax	I	FBgn0031857	LUBEL	33950	27.55	1035.14	0.24	1.1e-08	0.47	5.6e-07	0.26	0.84	FALSE	FALSE	FALSE	FALSE	0.51	0.77	0.77	0.89	0.06	0.31	0.97	0.92	1
thorax	I	FBgn0263289	scrib		25.06	5892.03	0.025	8.4e-06	0.13	0.00016	0.79	0.35	FALSE	FALSE	FALSE	FALSE	0.0035	0.1	0.031	0.14	-0.72	0.99	1	0.14	1
thorax	I	FBgn0027567	CG8108	39161	25.3	1007.5	0.026	1.2e-05	0.14	0.00022	1.2	0.43	FALSE	FALSE	FALSE	FALSE	0.05	0.29	0.63	0.81	-0.23	0.94	1	0.77	1
thorax	I	FBgn0034072	Dg	36773	26.47	719.34	0.0026	0.00052	0.037	0.005	0.65	0.34	FALSE	FALSE	FALSE	FALSE	0.005	0.11	0.35	0.61	-0.17	0.96	1	0.84	1
thorax	I	FBgn0033926	Arc1	36595	27.08	83928.1	0.056	3.6e-06	0.21	8.1e-05	0.79	0.92	FALSE	FALSE	FALSE	FALSE	0.096	0.39	0.7	0.85	-0.14	0.86	1	0.85	1
thorax	I	FBgn0034030	CG8192	36723	29.87	33.79	0.00063	0.0027	0.016	0.018	0.69	0.7	FALSE	FALSE	FALSE	FALSE	0.56	0.81	0.0024	0.025	0.55	0.19	0.95	0.2	1
thorax	I	FBgn0032899	CG9338	35357	27.28	390.81	0.16	4e-07	0.38	1.2e-05	0.62	0.58	FALSE	FALSE	FALSE	FALSE	0.12	0.43	0.43	0.67	-0.32	0.84	1	0.53	1
thorax	I	FBgn0033919	CG8547	36586	32.86	3067.38	0.061	7.5e-06	0.22	0.00015	0.25	0.46	FALSE	FALSE	FALSE	FALSE	0.42	0.73	0.37	0.62	0.11	0.12	0.92	0.3	1
thorax	I	FBgn0031294	IA-2	33277	24.9	3000.32	0.11	1.9e-06	0.31	4.6e-05	1.2	0.61	FALSE	FALSE	FALSE	FALSE	0.19	0.53	0.84	0.92	-0.14	0.84	1	0.28	1
thorax	I	FBgn0015664	Dref	34328	26.2	511.72	0.00025	0.014	0.0097	0.064	1.8	0.25	FALSE	FALSE	FALSE	FALSE	0.041	0.27	0.11	0.31	0.63	0.94	1	0.4	1
thorax	I	FBgn0263456	nwk	39052	26.32	430.48	0.42	2.2e-08	0.64	1e-06	0.39	0.61	FALSE	FALSE	FALSE	FALSE	0.33	0.66	0.57	0.77	-0.26	0.68	0.99	0.24	1
thorax	I	FBgn0028342	ATPsyndelta	31950	36.53	3618.69	0.52	5.6e-09	0.72	3.1e-07	0.066	0.55	FALSE	FALSE	FALSE	FALSE	0.065	0.33	0.0024	0.025	0.34	0.32	0.97	0.034	1
thorax	I	FBgn0038145	Droj2	41646	30.28	6442.02	0.29	2.1e-07	0.53	6.8e-06	0.25	0.42	FALSE	FALSE	FALSE	FALSE	0.44	0.75	0.99	1	0.0023	0.38	0.97	0.039	1
thorax	I	FBgn0010397	LamC	36615	32.88	1254.74	0.011	0.00049	0.085	0.0047	0.22	0.32	FALSE	FALSE	TRUE	FALSE	0.18	0.53	0.00011	0.0033	0.37	0.042	0.76	0.7	1
thorax	I	FBgn0036728	UQCR-Q	39950	35.5	5726.49	0.39	1e-07	0.62	3.7e-06	0.11	0.44	FALSE	FALSE	FALSE	FALSE	0.99	1	0.36	0.61	0.11	0.032	0.76	0.18	1
thorax	I	FBgn0028670	Vha100-2	42216	30.94	10309.7	0.29	4.9e-07	0.53	1.4e-05	0.095	0.34	FALSE	FALSE	FALSE	FALSE	0.2	0.54	0.44	0.68	-0.065	0.076	0.84	0.8	1
thorax	I	FBgn0032713	CG17323	35138	29.33	1796.15	0.37	1.7e-07	0.6	5.7e-06	0.28	0.53	FALSE	FALSE	FALSE	FALSE	0.45	0.75	0.88	0.94	-0.043	0.48	0.97	0.77	1
thorax	I	FBgn0260657	CG42540	38562	25.16	435.26	0.16	5.3e-06	0.38	0.00011	0.45	0.68	FALSE	FALSE	FALSE	FALSE	0.47	0.76	0.017	0.095	0.76	0.47	0.97	0.26	1
thorax	I	FBgn0013342	nSyb	38196	29.82	291.45	0.054	7.6e-05	0.21	0.0011	0.31	0.64	FALSE	FALSE	FALSE	FALSE	0.084	0.37	0.00015	0.0041	0.68	0.56	0.97	0.49	1
thorax	I	FBgn0030605	ND-B18	32434	28.28	1633.18	0.32	4.9e-07	0.56	1.4e-05	0.15	0.44	FALSE	FALSE	FALSE	FALSE	0.037	0.25	0.04	0.16	-0.31	0.72	1	0.15	1
thorax	I	FBgn0263346	CG43427	40583	26.97	4128.9	0.045	0.00013	0.19	0.0016	0.73	0.45	FALSE	FALSE	FALSE	FALSE	0.32	0.65	0.43	0.67	0.26	0.61	0.98	0.59	1
thorax	I	FBgn0016013	Faa	45577	27.31	1388.33	0.0066	0.0022	0.062	0.015	1.1	0.32	FALSE	FALSE	FALSE	FALSE	0.17	0.51	0.24	0.5	0.42	0.77	1	0.85	1
thorax	I	FBgn0039635	CG11876	43437	25.59	5267.71	0.48	6.7e-08	0.69	2.6e-06	0.42	0.46	FALSE	FALSE	FALSE	FALSE	0.81	0.93	0.28	0.53	0.62	0.43	0.97	0.062	1
thorax	I	FBgn0011296	l(2)efl	37744	34.35	1860.42	0.85	9.8e-11	0.93	8.2e-09	0.023	0.72	FALSE	FALSE	FALSE	FALSE	0.76	0.91	0.53	0.74	0.076	0.057	0.8	0.32	1
thorax	I	FBgn0013733	shot	36542	25.02	43068.1	0.056	0.00011	0.21	0.0015	1.5	0.42	FALSE	FALSE	FALSE	FALSE	0.012	0.15	0.07	0.23	-1.4	0.99	1	0.19	1
thorax	I	FBgn0001216	Hsc70-1	39542	32.93	4549.05	0.32	1e-06	0.56	2.6e-05	0.085	0.48	FALSE	FALSE	FALSE	FALSE	0.21	0.56	0.43	0.67	-0.063	0.056	0.8	0.92	1
thorax	I	FBgn0031264	CG11835	33232	29.29	310.87	0.55	6e-08	0.74	2.3e-06	0.15	0.79	FALSE	FALSE	FALSE	FALSE	0.061	0.32	0.0024	0.025	0.82	0.83	1	0.98	1
thorax	I	FBgn0010434	cora	37205	34.22	4893.04	0.037	0.00037	0.17	0.0038	0.17	0.3	FALSE	FALSE	FALSE	FALSE	0.49	0.77	0.19	0.42	0.096	0.0087	0.7	0.34	1
thorax	I	FBgn0038165	Task6	41671	25.16	69.05	0.048	0.00038	0.19	0.0039	0.94	0.74	FALSE	FALSE	FALSE	FALSE	0.58	0.83	0.0069	0.053	1.3	0.5	0.97	0.16	1
thorax	I	FBgn0022709	Adk1	39396	33.12	3461.73	0.18	2.3e-05	0.41	0.00038	0.17	0.46	FALSE	FALSE	FALSE	FALSE	0.36	0.69	0.93	0.96	0.011	0.14	0.93	0.9	1
thorax	I	FBgn0034067	CG8399	36768	29.14	1865.77	0.11	9.3e-05	0.31	0.0013	0.34	0.42	FALSE	FALSE	FALSE	FALSE	0.2	0.54	0.88	0.94	-0.028	0.53	0.97	0.16	1
thorax	I	FBgn0036787	CG4306	40017	24.39	314.58	0.042	0.00072	0.18	0.0065	0.82	0.59	FALSE	FALSE	FALSE	FALSE	0.56	0.81	0.0053	0.044	1.1	0.47	0.97	0.77	1
thorax	I	FBgn0038271	UQCR-C1	41800	36.86	20683	0.8	6.7e-09	0.9	3.5e-07	0.023	0.5	FALSE	FALSE	FALSE	FALSE	0.56	0.81	0.56	0.76	-0.048	0.018	0.7	0.068	1
thorax	I	FBgn0038072	CG6225	41559	29.22	1284.39	0.15	0.00014	0.36	0.0018	0.35	0.52	FALSE	FALSE	FALSE	FALSE	0.43	0.74	0.66	0.82	0.095	0.39	0.97	0.9	1
thorax	I	FBgn0039226	Ude	42953	25.88	350.51	0.012	0.0085	0.087	0.044	1.1	0.44	FALSE	FALSE	FALSE	FALSE	0.011	0.15	0.25	0.5	-0.45	0.98	1	0.58	1
thorax	I	FBgn0038876	CG5919	42526	26.39	572.16	0.15	0.00016	0.38	0.002	0.84	0.38	FALSE	FALSE	FALSE	FALSE	0.22	0.56	0.8	0.91	-0.14	0.79	1	0.097	1
thorax	I	FBgn0031971	Sirup	34089	27.94	1724.85	0.039	0.0023	0.17	0.016	1.2	0.56	FALSE	FALSE	FALSE	FALSE	0.19	0.53	0.7	0.85	0.19	0.81	1	0.17	1
thorax	I	FBgn0031942	CG7203	34055	35.14	26.95	0.044	0.002	0.19	0.014	0.25	0.78	FALSE	FALSE	FALSE	FALSE	0.088	0.38	0.74	0.87	-0.036	0.36	0.97	0.49	1
thorax	I	FBgn0037697	GstZ2	41133	24.93	1150.04	0.22	8.9e-05	0.45	0.0012	0.83	0.57	FALSE	FALSE	FALSE	FALSE	0.63	0.85	0.54	0.75	0.39	0.54	0.97	0.36	1
thorax	I	FBgn0039348	Npl4	43091	24.81	47938.5	0.85	1.6e-08	0.93	7.9e-07	0.18	0.6	FALSE	FALSE	FALSE	FALSE	0.9	0.97	0.99	0.99	0.016	0.45	0.97	0.13	1
thorax	I	FBgn0027554	CG8042	38886	25.91	1304.12	0.063	0.0018	0.23	0.013	1	0.26	FALSE	FALSE	FALSE	FALSE	0.25	0.59	0.71	0.86	0.18	0.75	1	0.55	1
thorax	I	FBgn0259822	Ca-beta	34557	28.63	417.55	0.27	7.6e-05	0.5	0.0011	0.28	0.56	FALSE	FALSE	FALSE	FALSE	0.65	0.87	0.077	0.24	0.43	0.29	0.97	0.82	1
thorax	I	FBgn0250814	UQCR-C2	39846	37.89	18877.7	0.74	2.5e-07	0.87	7.8e-06	0.043	0.44	FALSE	FALSE	FALSE	FALSE	0.7	0.89	0.84	0.92	-0.024	0.065	0.82	0.059	1
thorax	I	FBgn0004167	kst	38418	29.05	11884.7	0.012	0.018	0.087	0.077	0.58	0.2	FALSE	FALSE	FALSE	FALSE	0.65	0.86	0.034	0.15	0.45	0.24	0.97	0.62	1
thorax	I	FBgn0032382	Mal-B2	34598	24.37	4568	0.16	0.00039	0.38	0.004	0.57	0.33	FALSE	FALSE	FALSE	FALSE	0.42	0.73	0.74	0.87	0.12	0.58	0.98	0.42	1
thorax	I	FBgn0011305	Rsf1	34370	26.42	460.05	0.02	0.011	0.12	0.054	0.54	0.3	FALSE	FALSE	FALSE	FALSE	0.72	0.89	0.0047	0.04	0.65	0.21	0.96	0.22	1
thorax	I	FBgn0033504	CAP	36084	28.45	2960.18	0.12	0.0008	0.32	0.0071	0.43	0.43	FALSE	FALSE	FALSE	FALSE	0.84	0.94	0.17	0.4	0.36	0.24	0.97	0.39	1
thorax	I	FBgn0067864	Patj	44100	26.82	560.91	0.011	0.023	0.083	0.093	1.2	0.2	FALSE	FALSE	FALSE	FALSE	0.12	0.42	0.53	0.74	0.24	0.84	1	0.92	1
thorax	I	FBgn0023458	Rbcn-3A	31557	28.21	6018.11	0.34	5.3e-05	0.58	0.00079	0.22	0.32	FALSE	FALSE	FALSE	FALSE	0.75	0.91	0.57	0.77	0.12	0.23	0.97	0.28	1
thorax	I	FBgn0259994	CG42492	8674066	29.73	242.11	0.52	7.1e-06	0.72	0.00014	0.094	0.64	FALSE	FALSE	FALSE	FALSE	0.49	0.77	0.1	0.29	0.23	0.16	0.93	0.19	1
thorax	I	FBgn0020372	TM4SF	37786	26.87	331.28	0.09	0.0017	0.28	0.013	0.84	0.47	FALSE	FALSE	FALSE	FALSE	0.81	0.93	0.037	0.16	0.99	0.39	0.97	0.49	1
thorax	I	FBgn0086656	shrb	35933	29.83	1700.39	0.11	0.0012	0.31	0.0098	0.48	0.32	FALSE	FALSE	FALSE	FALSE	0.38	0.69	0.66	0.82	0.12	0.52	0.97	0.17	1
thorax	I	FBgn0004657	mys	44885	26.01	1927.4	0.081	0.0027	0.26	0.018	1.1	0.29	FALSE	FALSE	FALSE	FALSE	0.0035	0.1	0.0086	0.06	-1.7	1	1	0.95	1
thorax	I	FBgn0033958	jef	36634	26.11	372.35	0.12	0.0016	0.32	0.012	1.5	0.55	FALSE	FALSE	FALSE	FALSE	0.33	0.66	0.78	0.9	0.25	0.76	1	0.55	1
thorax	I	FBgn0014454	Acp1	34052	34.5	17.72	0.48	3.6e-05	0.69	0.00057	0.11	1.1	FALSE	FALSE	FALSE	FALSE	0.12	0.43	0.12	0.33	-0.23	0.51	0.97	0.95
thorax	I	FBgn0250788	beta-Spec	32746	33.74	10557.4	0.24	0.00052	0.47	0.005	0.088	0.23	FALSE	FALSE	FALSE	FALSE	0.37	0.69	0.97	0.99	-0.0023	0.011	0.7	0.48	1
thorax	I	FBgn0260747	Chchd2	32701	32.3	2421.82	0.61	1.2e-05	0.78	0.00021	0.15	0.41	FALSE	FALSE	FALSE	FALSE	0.67	0.87	0.94	0.98	-0.019	0.33	0.97	0.51	1
thorax	I	FBgn0264975	Nrg	31792	31.99	2643.02	0.14	0.002	0.36	0.014	0.16	0.28	FALSE	FALSE	FALSE	FALSE	0.28	0.62	0.99	1	0.0011	0.12	0.92	0.62	1
thorax	I	FBgn0034797	nahoda	37641	26.78	1196.29	0.036	0.016	0.17	0.072	0.61	0.21	FALSE	FALSE	FALSE	FALSE	0.033	0.24	0.34	0.6	-0.24	0.91	1	0.4	1
thorax	I	FBgn0002525	Lam	33782	33.66	620.94	0.07	0.0075	0.24	0.04	0.14	0.36	FALSE	FALSE	FALSE	FALSE	0.01	0.14	9.2e-06	0.00057	0.44	0.33	0.97	0.2	1
thorax	I	FBgn0036763	TrpRS-m	39989	25.97	634.64	0.063	0.0096	0.23	0.048	1.8	0.27	FALSE	FALSE	FALSE	FALSE	0.067	0.33	0.47	0.7	-0.64	0.95	1	0.49	1
thorax	I	FBgn0023507	D2hgdh	31184	29.57	11445.9	0.063	0.0097	0.23	0.049	0.29	0.25	FALSE	FALSE	FALSE	FALSE	0.51	0.78	0.0068	0.053	0.43	0.16	0.93	0.86	1
thorax	I	FBgn0021979	l(2)k09913	37661	26.61	1914.78	0.28	0.00058	0.52	0.0055	0.47	0.28	FALSE	FALSE	FALSE	FALSE	0.89	0.96	0.18	0.41	0.55	0.33	0.97	0.23	1
thorax	I	FBgn0000308	chic	33834	30.64	1672.13	0.055	0.015	0.21	0.069	0.3	0.3	FALSE	FALSE	FALSE	FALSE	0.45	0.75	0.0041	0.036	0.46	0.19	0.95	0.37	1
thorax	I	FBgn0031089	CG9572	33013	32.17	2873.67	0.62	2.6e-05	0.79	0.00042	0.13	0.71	FALSE	FALSE	FALSE	FALSE	0.54	0.8	0.17	0.39	0.36	0.37	0.97	0.54	1
thorax	I	FBgn0036688	Fit2	39907	26.67	311.62	0.14	0.0042	0.35	0.025	0.22	0.39	FALSE	FALSE	FALSE	FALSE	0.46	0.75	0.58	0.77	0.077	0.17	0.93	0.65	1
thorax	I	FBgn0027785	NP15.6	42282	31.18	3959.81	0.83	1.3e-06	0.92	3.3e-05	0.035	0.38	FALSE	FALSE	FALSE	FALSE	0.017	0.18	0.002	0.023	-0.58	0.87	1	0.008	0.78
thorax	I	FBgn0087035	AGO2	39683	27.03	10880.6	0.05	0.02	0.2	0.085	1.8	0.14	FALSE	FALSE	FALSE	FALSE	1	1	0.039	0.16	1.8	0.39	0.97	0.89	1
thorax	I	FBgn0011361	ND-ACP	38154	26.36	2849.33	0.56	6.4e-05	0.74	0.00091	0.29	0.34	FALSE	FALSE	FALSE	FALSE	0.1	0.41	0.079	0.24	-0.87	0.88	1	0.0068	0.72
thorax	I	FBgn0035241	CG12105	38190	28.49	1306.85	0.14	0.0066	0.35	0.036	0.38	0.48	FALSE	FALSE	FALSE	FALSE	0.47	0.76	0.56	0.76	0.13	0.39	0.97	0.48	1
thorax	I	FBgn0050021	metro	36176	30.62	656.39	0.39	0.00047	0.62	0.0046	0.095	0.54	FALSE	FALSE	FALSE	FALSE	0.12	0.44	0.17	0.4	-0.15	0.26	0.97	0.57	1
thorax	I	FBgn0082582	tmod	43633	27.71	3167.88	0.14	0.0074	0.35	0.04	1.2	0.34	FALSE	FALSE	FALSE	FALSE	0.13	0.45	0.52	0.74	-0.46	0.89	1	0.73	1
thorax	I	FBgn0010263	Rbp9	33498	26.87	4223.92	0.092	0.014	0.28	0.066	1.1	0.42	FALSE	FALSE	FALSE	FALSE	0.2	0.54	0.97	0.99	-0.019	0.81	1	0.46	1
thorax	I	FBgn0003885	alphaTub84D	40904	34.41	1202.56	0.18	0.0057	0.41	0.033	0.12	0.26	FALSE	FALSE	FALSE	FALSE	0.095	0.39	0.29	0.54	-0.091	0.16	0.93	0.89	1
thorax	I	FBgn0033570	ND-B14	36159	33.28	2849.36	0.8	8.7e-06	0.9	0.00017	0.034	0.44	FALSE	FALSE	FALSE	FALSE	0.98	1	0.82	0.92	0.03	0.046	0.76	0.031	1
thorax	I	FBgn0013432	bcn92	31186	30.45	133.1	0.34	0.0014	0.57	0.011	0.17	0.55	FALSE	FALSE	FALSE	FALSE	0.27	0.6	0.55	0.75	-0.099	0.38	0.97	0.32	1
thorax	I	FBgn0001250	if	32661	31.72	3870.64	0.13	0.013	0.34	0.059	0.17	0.28	FALSE	FALSE	FALSE	FALSE	0.74	0.9	0.25	0.51	0.12	0.037	0.76	0.66	1
thorax	I	FBgn0000346	comt	47091	31.73	809.72	0.38	0.0012	0.61	0.0098	0.1	0.43	FALSE	FALSE	FALSE	FALSE	0.22	0.56	0.012	0.075	0.3	0.18	0.94	0.72	1
thorax	I	FBgn0261276	Opa1	36578	31.28	3445.83	0.19	0.0069	0.42	0.038	0.16	0.26	FALSE	FALSE	FALSE	FALSE	0.83	0.93	0.28	0.53	0.12	0.034	0.76	0.91	1
thorax	I	FBgn0037653	CG11982	41080	24.84	820.75	0.26	0.0039	0.5	0.024	0.42	0.29	FALSE	FALSE	FALSE	FALSE	0.34	0.67	0.83	0.92	-0.074	0.62	0.99	0.18	1
thorax	I	FBgn0004397	Vinc	31201	33.61	1051.96	0.47	0.00063	0.69	0.0059	0.057	0.39	FALSE	FALSE	FALSE	FALSE	0.48	0.76	0.79	0.9	-0.02	0.013	0.7	0.27	1
thorax	I	FBgn0032744	Ttc19	35172	27.78	1621.87	0.36	0.0018	0.59	0.013	0.61	0.35	FALSE	FALSE	FALSE	FALSE	0.34	0.67	0.67	0.83	-0.27	0.72	1	0.44	1
thorax	I	FBgn0030403	CG1824	32208	27.34	1125.58	0.46	0.00076	0.68	0.0068	0.18	0.25	FALSE	FALSE	FALSE	FALSE	0.25	0.59	0.36	0.61	-0.21	0.56	0.97	0.42	1
thorax	I	FBgn0004103	Pp1-87B	49260	27.21	2006.59	0.13	0.017	0.34	0.073	0.45	0.24	FALSE	FALSE	FALSE	FALSE	0.65	0.86	0.03	0.14	0.63	0.34	0.97	0.37	1
thorax	I	FBgn0014024	Rnp4F	31448	25.1	453.22	0.21	0.0075	0.44	0.04	0.85	0.26	FALSE	FALSE	FALSE	FALSE	0.61	0.84	0.54	0.75	0.38	0.56	0.97	0.51	1
thorax	I	FBgn0004575	Syn	41247	29.42	754.56	0.1	0.024	0.3	0.096	0.2	0.33	FALSE	FALSE	FALSE	FALSE	0.39	0.71	0.59	0.78	0.06	0.11	0.91	0.18	1
thorax	I	FBgn0038659	EndoA	42265	30.6	744.08	0.28	0.0043	0.52	0.026	0.19	0.33	FALSE	FALSE	FALSE	FALSE	0.35	0.68	0.02	0.1	0.41	0.31	0.97	0.71	1
thorax	I	FBgn0002772	Mlc1	43323	37.5	11511.3	0.38	0.002	0.61	0.014	0.12	0.43	FALSE	FALSE	FALSE	FALSE	0.82	0.93	0.54	0.75	0.076	0.056	0.8	0.23	1
thorax	I	FBgn0035438	PHGPx	38413	34.55	7005.85	0.5	0.00073	0.7	0.0066	0.077	0.25	FALSE	FALSE	FALSE	FALSE	0.004	0.1	3.4e-05	0.0015	0.58	0.86	1	0.24	1
thorax	I	FBgn0037001	ND-39	40272	35.17	15745.5	0.43	0.0013	0.65	0.01	0.068	0.31	FALSE	FALSE	FALSE	FALSE	0.23	0.57	0.35	0.6	-0.077	0.056	0.8	0.1	1
thorax	I	FBgn0263995	cpo	45840	25	2050.65	0.48	0.00087	0.69	0.0076	0.23	0.35	FALSE	FALSE	FALSE	FALSE	0.075	0.35	0.0027	0.027	1.1	0.86	1	0.15	1
thorax	I	FBgn0023129	aay	39085	27.43	6074.84	0.48	0.00098	0.69	0.0082	0.18	0.56	FALSE	FALSE	FALSE	FALSE	0.09	0.38	0.0036	0.033	0.79	0.78	1	0.32	1
thorax	I	FBgn0265262	Vha68-1	45668	32.69	3074.78	0.22	0.0093	0.45	0.047	0.15	0.32	FALSE	FALSE	FALSE	FALSE	0.79	0.92	0.35	0.6	0.11	0.043	0.76	0.84	1
thorax	I	FBgn0000635	Fas2	31364	28.76	1572.08	0.13	0.023	0.34	0.092	0.27	0.26	FALSE	FALSE	FALSE	FALSE	0.24	0.58	0.93	0.97	-0.014	0.4	0.97	0.97	1
thorax	I	FBgn0038224	ATPsynE	41745	35.74	7582.25	0.66	0.00022	0.82	0.0025	0.071	0.35	FALSE	FALSE	FALSE	FALSE	0.033	0.24	0.0013	0.017	0.58	0.77	1	0.069	1
thorax	I	FBgn0052626	AMPdeam	32352	29.74	3276.98	0.13	0.023	0.35	0.093	0.18	0.21	FALSE	FALSE	FALSE	FALSE	0.042	0.27	0.14	0.36	-0.17	0.52	0.97	0.44	1
thorax	I	FBgn0001186	Hex-A	45875	29.26	4481.16	0.57	0.00053	0.76	0.005	0.082	0.33	FALSE	FALSE	FALSE	FALSE	0.26	0.59	0.29	0.55	-0.15	0.29	0.97	0.079	1
thorax	I	FBgn0023540	CG3630	31189	31.3	3236.75	0.2	0.013	0.43	0.06	0.21	0.41	FALSE	FALSE	FALSE	FALSE	0.048	0.29	0.11	0.3	-0.25	0.71	1	0.86	1
thorax	I	FBgn0004363	porin	34500	36.95	20171.2	0.17	0.018	0.39	0.077	0.19	0.23	FALSE	FALSE	FALSE	FALSE	0.63	0.85	0.43	0.67	0.099	0.089	0.86	0.32	1
thorax	I	FBgn0026428	HDAC6	32461	25.43	4450.46	0.15	0.022	0.37	0.09	0.67	0.21	FALSE	FALSE	FALSE	FALSE	0.43	0.74	0.013	0.081	1.2	0.59	0.98	0.64	1
thorax	I	FBgn0000046	Act87E	48632	32.92	4981.31	0.97	5.1e-07	0.99	1.4e-05	0.0062	0.72	FALSE	FALSE	FALSE	FALSE	0.14	0.46	0.039	0.16	-0.34	0.52	0.97	0.7	1
thorax	I	FBgn0034504	CG8929	37306	30.07	430.11	0.49	0.0014	0.7	0.011	0.25	0.43	FALSE	FALSE	FALSE	FALSE	0.1	0.4	0.095	0.28	-0.6	0.84	1	0.68	1
thorax	I	FBgn0022959	yps	39377	30.62	1626.49	0.19	0.017	0.42	0.073	0.26	0.32	FALSE	FALSE	FALSE	FALSE	1	1	0.17	0.4	0.26	0.11	0.89	0.56	1
thorax	I	FBgn0000422	Ddc	35190	25.72	1342.08	0.93	4.9e-06	0.97	0.00011	0.087	0.39	FALSE	FALSE	FALSE	FALSE	0.61	0.84	0.51	0.73	-0.6	0.6	0.98	0.041	1
thorax	I	FBgn0086355	Tpi	43582	35.98	7243.3	0.29	0.0095	0.53	0.048	0.096	0.27	FALSE	FALSE	FALSE	FALSE	0.041	0.27	0.054	0.2	-0.17	0.28	0.97	0.27	1
thorax	I	FBgn0034723	CG13506	37556	29.03	2077.88	0.24	0.014	0.47	0.066	0.45	0.34	FALSE	FALSE	FALSE	FALSE	0.89	0.96	0.29	0.55	0.38	0.3	0.97	0.6	1
thorax	I	FBgn0030692	mRpS30	32530	25.44	2251.6	0.72	0.00027	0.86	0.003	0.34	0.33	FALSE	FALSE	FALSE	FALSE	0.71	0.89	0.87	0.94	-0.14	0.54	0.97	0.5	1
thorax	I	FBgn0033484	CG2269	36056	28.35	1110.44	0.28	0.011	0.52	0.054	0.27	0.45	FALSE	FALSE	FALSE	FALSE	0.74	0.9	0.11	0.3	0.38	0.25	0.97	0.7	1
thorax	I	FBgn0002645	Map205	43765	30.69	2994.31	0.4	0.0045	0.63	0.027	0.12	0.28	FALSE	FALSE	FALSE	FALSE	0.056	0.3	0.0011	0.016	0.49	0.58	0.98	0.88	1
thorax	I	FBgn0015789	Rab10	33025	27.07	3407.08	0.44	0.0032	0.66	0.021	0.51	0.27	FALSE	FALSE	FALSE	FALSE	0.93	0.98	0.35	0.61	0.58	0.38	0.97	0.54	1
thorax	I	FBgn0030263	CG2076	32041	27.67	4925.42	0.82	7.4e-05	0.91	0.001	0.081	0.27	FALSE	FALSE	FALSE	FALSE	0.18	0.53	0.091	0.27	-0.6	0.75	1	0.39	1
thorax	I	FBgn0003744	trc	40165	27.55	699.73	0.65	0.00063	0.81	0.0058	0.14	0.3	FALSE	FALSE	FALSE	FALSE	0.25	0.59	0.24	0.49	-0.33	0.63	0.99	0.23	1
thorax	I	FBgn0036992	CG11796	40263	29.07	13773.3	0.52	0.0023	0.72	0.016	0.15	0.39	FALSE	FALSE	FALSE	FALSE	0.035	0.24	0.00088	0.013	0.88	0.88	1	0.72	1
thorax	I	FBgn0260858	Ykt6	31706	26.45	219.74	0.38	0.0067	0.61	0.037	0.28	0.37	FALSE	FALSE	FALSE	FALSE	0.47	0.76	0.059	0.2	0.61	0.48	0.97	1	1
thorax	I	FBgn0034877	levy	37728	35.95	8813.66	0.23	0.023	0.46	0.092	0.17	0.17	FALSE	FALSE	FALSE	FALSE	0.4	0.72	0.94	0.98	0.009	0.16	0.93	0.16	1
thorax	I	FBgn0033518	Prx2540-2	36098	32.6	669.65	0.24	0.024	0.47	0.095	0.1	0.38	FALSE	FALSE	FALSE	FALSE	0.0023	0.09	5.7e-06	0.00039	0.53	0.75	1	0.071	1
thorax	I	FBgn0033807	AQP	36456	29.57	2164.63	0.81	0.0002	0.91	0.0023	0.074	0.44	FALSE	FALSE	FALSE	FALSE	0.79	0.92	0.89	0.95	-0.041	0.3	0.97	0.32	1
thorax	I	FBgn0020626	Osbp	42985	27.45	2197.31	0.63	0.0016	0.8	0.012	0.12	0.23	FALSE	FALSE	FALSE	FALSE	0.84	0.94	0.42	0.67	0.2	0.23	0.97	0.42	1
thorax	I	FBgn0031436	ND-B17.2	33443	33.83	5531.3	0.35	0.014	0.58	0.066	0.1	0.2	FALSE	FALSE	FALSE	FALSE	0.097	0.39	0.14	0.36	-0.15	0.28	0.97	0.014	1
thorax	I	FBgn0029095	aru	33268	27.69	1649.67	0.56	0.0043	0.74	0.026	0.15	0.36	FALSE	FALSE	FALSE	FALSE	0.88	0.96	0.4	0.65	0.2	0.21	0.96	0.89	1
thorax	I	FBgn0005674	GluProRS	42834	28.69	2732.81	0.49	0.0072	0.7	0.039	0.2	0.26	FALSE	FALSE	FALSE	FALSE	0.86	0.95	0.63	0.81	0.13	0.24	0.97	0.62	1
thorax	I	FBgn0022985	qkr58E-2	37562	28.63	792.46	0.6	0.0038	0.78	0.024	0.13	0.38	FALSE	FALSE	FALSE	FALSE	0.62	0.84	0.21	0.45	0.3	0.31	0.97	0.64	1
thorax	I	FBgn0031306	CG4577	33291	28.38	532.61	0.71	0.0016	0.85	0.012	0.098	0.44	FALSE	FALSE	FALSE	FALSE	0.0097	0.14	0.0013	0.017	-0.93	0.97	1	0.51	1
thorax	I	FBgn0030558	CG1461	32381	24.63	10744.9	0.75	0.0014	0.88	0.011	0.21	0.34	FALSE	FALSE	FALSE	FALSE	0.5	0.77	0.2	0.43	0.83	0.62	0.99	0.29	1
thorax	I	FBgn0267252	Ggamma30A	45234	27.14	679.97	0.71	0.0023	0.85	0.016	0.12	0.55	FALSE	FALSE	FALSE	FALSE	0.28	0.61	0.23	0.48	-0.36	0.62	0.99	0.5	1
thorax	I	FBgn0030102	SmydA-9	31859	30.29	1721.36	0.55	0.0087	0.74	0.045	0.072	0.5	FALSE	FALSE	FALSE	FALSE	0.0099	0.14	0.0023	0.025	-0.4	0.78	1	0.59	1
thorax	I	FBgn0001090	bnb	32872	32.31	236.9	0.94	8e-05	0.97	0.0011	0.015	0.65	FALSE	FALSE	FALSE	FALSE	0.96	0.99	0.88	0.95	0.028	0.12	0.92	0.71	1
thorax	I	FBgn0265998	Doa	43415	28.59	4866.01	0.94	0.00015	0.97	0.0018	0.018	0.46	FALSE	FALSE	FALSE	FALSE	0.81	0.92	0.66	0.82	0.094	0.2	0.96	0.92	1
thorax	I	FBgn0013995	Calx	42481	28.09	935.95	0.54	0.014	0.74	0.064	0.22	0.34	FALSE	FALSE	FALSE	FALSE	0.4	0.71	0.55	0.75	-0.2	0.56	0.97	0.48	1
thorax	I	FBgn0034027	CG8187	36720	29.16	366.02	0.51	0.018	0.71	0.076	0.11	0.28	FALSE	FALSE	FALSE	FALSE	0.52	0.79	0.82	0.92	-0.036	0.19	0.95	0.95	1
thorax	I	FBgn0085427	CG34398	5740462	24.68	1775.72	0.68	0.0066	0.83	0.036	0.24	0.45	FALSE	FALSE	FALSE	FALSE	0.25	0.59	0.21	0.45	-0.69	0.77	1	0.46	1
thorax	I	FBgn0010213	Sod2	36878	33.81	3928	0.92	0.00044	0.96	0.0043	0.016	0.29	FALSE	FALSE	FALSE	FALSE	0.059	0.31	0.011	0.073	-0.43	0.68	0.99	0.057	1
thorax	I	FBgn0027356	Amph	36383	34.29	3706.01	0.73	0.0062	0.86	0.035	0.031	0.31	FALSE	FALSE	FALSE	FALSE	0.91	0.97	0.84	0.92	0.017	0.0089	0.7	0.3	1
thorax	I	FBgn0034087	clu	36793	27.5	1945.93	0.57	0.02	0.76	0.082	0.13	0.25	FALSE	FALSE	FALSE	FALSE	0.91	0.97	0.67	0.83	0.092	0.17	0.93	0.8	1
thorax	I	FBgn0038474	mRpS11	42061	26.12	446.11	0.61	0.019	0.78	0.08	0.33	0.25	FALSE	FALSE	FALSE	FALSE	0.56	0.81	0.75	0.88	-0.19	0.58	0.98	0.47	1
thorax	I	FBgn0024947	NTPase	33495	28.12	3223.57	0.78	0.0051	0.89	0.03	0.068	0.21	FALSE	FALSE	FALSE	FALSE	0.25	0.59	0.17	0.39	-0.32	0.56	0.97	0.71	1
thorax	I	FBgn0033879	CG6543	36536	33.39	1614.28	0.6	0.02	0.77	0.085	0.045	0.24	FALSE	FALSE	FALSE	FALSE	0.0019	0.081	1.8e-05	0.0009	0.47	0.75	1	0.58	1
thorax	I	FBgn0010226	GstS1	36927	36.54	2842.23	0.63	0.019	0.8	0.079	0.05	0.24	FALSE	FALSE	FALSE	FALSE	0.0055	0.11	0.00073	0.012	-0.4	0.77	1	0.64	1
thorax	I	FBgn0035589	CHMP2B	38599	25.63	479.52	0.94	0.00046	0.97	0.0046	0.045	0.38	FALSE	FALSE	FALSE	FALSE	0.45	0.75	0.31	0.57	-0.61	0.64	0.99	0.05	1
thorax	I	FBgn0034914	CG5554	37775	25.36	1007.83	0.82	0.0043	0.91	0.026	0.2	0.23	FALSE	FALSE	FALSE	FALSE	0.044	0.28	0.0095	0.064	-2.4	0.96	1	0.11	1
thorax	I	FBgn0037238	CG1090	40551	25.24	429.09	0.91	0.0011	0.95	0.0092	0.093	0.48	FALSE	FALSE	FALSE	FALSE	0.92	0.97	0.97	0.99	-0.026	0.42	0.97	0.29	1
thorax	I	FBgn0028371	jbug	43997	31.47	6255.24	0.91	0.0015	0.95	0.011	0.016	0.3	FALSE	FALSE	FALSE	FALSE	0.21	0.56	0.061	0.21	0.25	0.29	0.97	0.033	1
thorax	I	FBgn0032293	Dpy-30L1	34480	25.51	62.49	0.71	0.015	0.85	0.068	0.31	0.5	FALSE	FALSE	FALSE	FALSE	0.99	1	0.71	0.85	0.3	0.39	0.97	0.054	1
thorax	I	FBgn0032236	mRpS7	34412	25.26	1350.83	0.87	0.0035	0.93	0.022	0.1	0.31	FALSE	FALSE	FALSE	FALSE	0.97	0.99	0.9	0.95	0.072	0.36	0.97	0.71	1
thorax	I	FBgn0036661	CG9705	39875	30.02	759.39	0.85	0.007	0.93	0.038	0.037	0.42	FALSE	FALSE	FALSE	FALSE	0.19	0.54	0.045	0.18	0.4	0.53	0.97	0.45	1
thorax	I	FBgn0039252	CG11771	42984	29.61	3628	0.88	0.0052	0.94	0.03	0.023	0.26	FALSE	FALSE	FALSE	FALSE	0.64	0.86	0.41	0.66	0.13	0.15	0.93	0.57	1
thorax	I	FBgn0014877	Roe1	36508	30.84	495.34	0.78	0.017	0.89	0.075	0.047	0.22	FALSE	FALSE	FALSE	FALSE	0.33	0.66	0.26	0.52	-0.18	0.3	0.97	0.68	1
thorax	I	FBgn0263603	Zn72D	39764	26.31	655	0.78	0.021	0.89	0.085	0.16	0.23	FALSE	FALSE	FALSE	FALSE	0.29	0.62	0.21	0.45	-0.68	0.74	1	0.85	1
thorax	I	FBgn0028429	I-2	39156	26.52	658.71	0.95	0.0047	0.97	0.028	0.018	0.23	FALSE	FALSE	FALSE	FALSE	0.46	0.75	0.25	0.51	0.29	0.43	0.97	0.37	1
thorax	I	FBgn0262579	Ect4	38895	25.52	21230.5	0.98	0.0035	0.99	0.022	0.0064	0.41	FALSE	FALSE	FALSE	FALSE	0.98	1	0.99	0.99	-0.0048	0.22	0.96	0.53	1
thorax	I	FBgn0035755	CG14830	38800	28.51	626.86	0.96	0.021	0.98	0.086	0.01	0.27	FALSE	FALSE	FALSE	FALSE	0.52	0.79	0.32	0.58	0.18	0.26	0.97	0.81	1
thorax	I	FBgn0003887	betaTub56D	37238	35.42	6255.12	0.98	0.01	0.99	0.05	0.0016	0.24	FALSE	FALSE	FALSE	FALSE	0.91	0.97	0.89	0.95	-0.0098	0.0025	0.7	0.65	1
thorax	II	FBgn0038257	smp-30	41786	27.9	1565.1	0.3	2.5e-40	0.54	4.9e-37	0.37	-1.6	TRUE	FALSE	FALSE	TRUE	0.77	0.91	0.14	0.35	0.51	0.34	0.97	2e-06	0.0026
thorax	II	FBgn0086254	CG6084	39304	28.03	4874.78	0.35	2.5e-17	0.59	7.3e-15	0.19	-0.53	TRUE	FALSE	FALSE	FALSE	0.85	0.94	0.21	0.45	0.24	0.15	0.93	0.0019	0.35
thorax	II	FBgn0010385	Def	36047	25.1	238.26	0.97	8.6e-24	0.99	5.3e-21	0.024	-2.4	TRUE	FALSE	FALSE	FALSE	0.024	0.21	0.0025	0.025	-2	0.97	1	0.0016	0.32
thorax	II	FBgn0036007	path	39106	27.48	7980.24	0.062	3.1e-15	0.22	6.7e-13	0.66	-0.66	TRUE	FALSE	FALSE	FALSE	0.032	0.24	0.22	0.46	-0.4	0.93	1	0.003	0.49
thorax	II	FBgn0027560	Tps1	33642	31.44	36948.2	2.6e-06	0.00025	0.00039	0.0027	0.8	-0.41	TRUE	FALSE	TRUE	FALSE	0.61	0.84	3.3e-07	4.1e-05	0.88	0.061	0.8	0.35	1
thorax	II	FBgn0037819	CG14688	41275	30.03	3500.46	5.4e-07	0.011	0.00012	0.054	1	-0.31	TRUE	FALSE	FALSE	FALSE	0.029	0.23	1.6e-09	8.8e-07	1.5	0.69	0.99	0.92	1
thorax	II	FBgn0052068	Adi1	326189	29.61	2298.1	0.0023	5.7e-05	0.036	0.00083	0.69	-0.46	TRUE	FALSE	FALSE	FALSE	0.39	0.7	0.023	0.11	0.46	0.35	0.97	0.18	1
thorax	II	FBgn0041194	Prat2	38753	28.77	6212.22	0.085	1.1e-07	0.27	4e-06	0.35	-0.86	TRUE	FALSE	FALSE	FALSE	0.024	0.21	3.8e-05	0.0016	1	0.87	1	0.91	1
thorax	II	FBgn0038194	Cyp6d5	41706	26.12	5028.06	0.22	3.4e-09	0.46	2e-07	1.1	-0.75	TRUE	FALSE	FALSE	FALSE	0.31	0.64	0.86	0.93	-0.15	0.77	1	0.2	1
thorax	II	FBgn0031327	CG5397	33313	28.15	1523.96	0.42	1e-10	0.65	8.6e-09	0.19	-0.8	TRUE	FALSE	FALSE	FALSE	0.017	0.18	0.0082	0.058	-0.65	0.93	1	0.18	1
thorax	II	FBgn0031907	CG5171	34016	28.08	2265.28	0.0012	0.00029	0.023	0.0031	0.98	-0.43	TRUE	FALSE	FALSE	FALSE	0.014	0.17	0.87	0.93	0.04	0.95	1	0.6	1
thorax	II	FBgn0087002	apolpp	43827	36.32	377170	0.11	7.3e-08	0.31	2.8e-06	0.15	-0.87	TRUE	FALSE	FALSE	FALSE	0.0014	0.073	1.3e-06	0.00013	0.63	0.85	1	0.25	1
thorax	II	FBgn0032287	CG6415	34474	29.09	1198.83	0.033	1.8e-06	0.16	4.3e-05	0.53	-0.59	TRUE	FALSE	FALSE	FALSE	0.044	0.28	0.49	0.72	-0.15	0.86	1	0.72	1
thorax	II	FBgn0040070	Trx-2	34281	31.61	2672.4	0.027	1e-05	0.14	0.00019	0.41	-0.36	TRUE	FALSE	FALSE	FALSE	0.54	0.8	0.0029	0.028	0.55	0.21	0.96	0.93	1
thorax	II	FBgn0011770	Gip	31960	26.75	1657.36	0.028	1.2e-05	0.14	0.00022	0.89	-0.51	TRUE	FALSE	FALSE	FALSE	0.14	0.46	0.77	0.89	0.1	0.81	1	0.38	1
thorax	II	FBgn0033367	PPO2	35910	32.63	1788.91	0.17	2.2e-07	0.4	7e-06	0.14	-0.99	TRUE	FALSE	FALSE	FALSE	0.00041	0.045	0.00014	0.0041	-0.45	0.96	1	0.2	1
thorax	II	FBgn0034935	Orcokinin	37806	27.21	499.18	0.35	1.2e-08	0.58	5.8e-07	0.21	-0.83	TRUE	FALSE	FALSE	FALSE	0.61	0.84	0.79	0.9	0.056	0.28	0.97	0.23	1
thorax	II	FBgn0086691	UK114	34897	32.38	1314.62	0.0066	0.00066	0.062	0.006	0.26	-0.47	TRUE	FALSE	FALSE	FALSE	0.0037	0.1	3e-07	4e-05	0.65	0.66	0.99	0.37	1
thorax	II	FBgn0036760	CG5567	39986	27.87	1063.31	0.033	6.6e-05	0.16	0.00094	0.53	-0.34	TRUE	FALSE	FALSE	FALSE	0.0024	0.09	0.014	0.083	-0.59	0.99	1	0.58	1
thorax	II	FBgn0036106	CG6409	39220	33.66	23981.7	0.5	8.7e-09	0.71	4.5e-07	0.12	-0.65	TRUE	FALSE	FALSE	TRUE	0.16	0.5	0.011	0.072	0.47	0.51	0.97	5e-05	0.026
thorax	II	FBgn0004047	Yp3	32339	36.34	414454	0.54	6.4e-09	0.74	3.4e-07	0.062	-0.78	TRUE	FALSE	FALSE	FALSE	1.8e-05	0.0051	5.3e-08	1.1e-05	0.88	1	1	0.18	1
thorax	II	FBgn0261608	RpL37A	44783	27.49	9869.63	0.0075	0.0012	0.065	0.0094	1.5	-0.31	TRUE	FALSE	FALSE	FALSE	0.12	0.44	0.4	0.65	0.4	0.86	1	0.53	1
thorax	II	FBgn0032820	fbp	35265	30.75	3774.59	0.046	7.7e-05	0.19	0.0011	0.25	-0.47	TRUE	FALSE	FALSE	FALSE	0.26	0.59	0.57	0.77	0.063	0.17	0.93	0.28	1
thorax	II	FBgn0016126	CaMKI	43792	27.44	7706.93	0.23	1.2e-06	0.47	3e-05	0.3	-0.6	TRUE	FALSE	FALSE	FALSE	0.77	0.91	0.099	0.28	0.39	0.24	0.97	0.36	1
thorax	II	FBgn0010198	RpS15Aa	44150	28.21	19264	0.0097	0.0011	0.078	0.0089	2.1	-0.31	TRUE	FALSE	FALSE	FALSE	0.041	0.27	0.9	0.95	-0.085	0.96	1	0.98	1
thorax	II	FBgn0034198	CG11400	36935	26.78	1669.55	0.0031	0.0055	0.041	0.031	1.8	-0.41	TRUE	FALSE	FALSE	FALSE	0.017	0.18	0.85	0.92	-0.094	0.98	1	0.39	1
thorax	II	FBgn0035189	CG9119	38124	24.59	434.75	0.25	2.2e-06	0.49	5.2e-05	0.82	-0.88	TRUE	FALSE	FALSE	FALSE	0.2	0.54	0.0053	0.044	2.1	0.83	1	0.7	1
thorax	II	FBgn0027590	GstE12	37960	31.92	5903.29	0.0038	0.0048	0.047	0.028	0.45	-0.27	TRUE	FALSE	FALSE	FALSE	0.14	0.46	0.22	0.46	0.16	0.39	0.97	0.4	1
thorax	II	FBgn0250843	Prosalpha6	34359	31.44	714.06	0.012	0.0022	0.087	0.015	0.36	-0.34	TRUE	FALSE	FALSE	FALSE	0.3	0.63	0.17	0.4	0.17	0.2	0.96	0.19	1
thorax	II	FBgn0263121	Prosalpha1	246582	30.27	1495.72	0.022	0.0015	0.13	0.012	0.44	-0.29	TRUE	FALSE	FALSE	FALSE	0.61	0.84	0.0032	0.03	0.56	0.19	0.95	0.43	1
thorax	II	FBgn0085282	CG34253	5740501	26.56	78.39	0.083	0.00017	0.26	0.002	1	-0.75	TRUE	FALSE	FALSE	FALSE	0.47	0.76	0.4	0.65	0.46	0.62	0.99	0.97	1
thorax	II	FBgn0040529	COX7A	50002	30.77	1105.65	0.023	0.0016	0.13	0.012	0.48	-0.4	TRUE	FALSE	FALSE	FALSE	0.96	0.99	0.014	0.085	0.49	0.12	0.91	0.11	1
thorax	II	FBgn0033820	CG4716	36471	25.82	22177.8	0.0042	0.011	0.049	0.054	1.2	-0.31	TRUE	FALSE	FALSE	FALSE	0.005	0.11	0.25	0.5	-0.43	0.99	1	0.23	1
thorax	II	FBgn0031975	Tg	34093	28.16	99628.8	0.041	0.0008	0.18	0.0071	0.4	-0.51	TRUE	FALSE	FALSE	FALSE	0.029	0.23	2.2e-05	0.001	1	0.84	1	0.63	1
thorax	II	FBgn0001112	Gld	40875	27.35	375.76	0.68	4.5e-08	0.83	1.8e-06	0.074	-0.91	TRUE	FALSE	FALSE	FALSE	0.068	0.33	0.028	0.13	-0.4	0.7	0.99	0.59	1
thorax	II	FBgn0014000	Hf	44038	24.69	2387.53	0.66	9.2e-08	0.82	3.4e-06	0.32	-0.69	TRUE	FALSE	FALSE	FALSE	0.99	1	0.63	0.81	0.33	0.37	0.97	0.035	1
thorax	II	FBgn0023175	Prosalpha7	36018	29.3	1949.07	0.079	0.00045	0.26	0.0045	0.61	-0.28	TRUE	FALSE	FALSE	FALSE	0.28	0.61	0.72	0.86	0.11	0.64	0.99	0.16	1
thorax	II	FBgn0033065	Cyp6w1	35543	24.78	3288.43	0.3	1.3e-05	0.54	0.00024	0.47	-0.53	TRUE	FALSE	FALSE	FALSE	0.23	0.57	0.0092	0.063	1.2	0.75	1	0.28	1
thorax	II	FBgn0032160	CG4598	34315	32.06	1048.96	0.051	0.001	0.2	0.0086	0.23	-0.27	TRUE	FALSE	FALSE	FALSE	0.61	0.84	0.0086	0.06	0.3	0.046	0.76	0.16	1
thorax	II	FBgn0034688	CG11474	37514	26.49	634.33	0.004	0.02	0.048	0.085	0.73	-0.22	TRUE	FALSE	FALSE	FALSE	0.0012	0.061	0.045	0.18	-0.45	0.99	1	0.058	1
thorax	II	FBgn0037433	CG17919	40780	30.49	1024.47	0.0072	0.013	0.064	0.06	0.41	-0.22	TRUE	FALSE	FALSE	FALSE	0.076	0.35	0.63	0.81	0.062	0.53	0.97	0.25	1
thorax	II	FBgn0004045	Yp1	31939	36.19	559095	0.13	0.0002	0.34	0.0023	0.16	-0.43	TRUE	FALSE	FALSE	FALSE	1.2e-05	0.0051	7.9e-09	2.6e-06	1	1	1	0.28	1
thorax	II	FBgn0031913	CG5958	34022	30.06	2144.55	0.0055	0.017	0.058	0.074	0.55	-0.36	TRUE	FALSE	FALSE	FALSE	0.92	0.98	0.005	0.042	0.53	0.1	0.89	0.88	1
thorax	II	FBgn0260960	Baldspot	39860	25.55	2760.96	0.76	4.5e-08	0.88	1.8e-06	0.25	-0.79	TRUE	FALSE	FALSE	FALSE	0.21	0.55	0.13	0.34	-1.2	0.83	1	0.026	1
thorax	II	FBgn0262124	uex	5740320	26.82	4015.2	0.58	8.3e-07	0.76	2.2e-05	0.11	-0.55	TRUE	FALSE	FALSE	FALSE	0.096	0.39	0.066	0.22	-0.37	0.69	0.99	0.65	1
thorax	II	FBgn0020369	Rpt6	33105	29.16	1622.33	0.1	0.00047	0.3	0.0046	0.33	-0.26	TRUE	FALSE	FALSE	FALSE	0.13	0.44	0.62	0.81	-0.092	0.62	0.99	0.15	1
thorax	II	FBgn0031143	CG1532	33076	29.84	786.26	0.76	5.8e-08	0.88	2.3e-06	0.065	-0.59	TRUE	FALSE	FALSE	FALSE	0.39	0.7	0.35	0.6	-0.19	0.39	0.97	0.098	1
thorax	II	FBgn0001257	ImpL2	38513	28.99	370.53	0.052	0.0019	0.2	0.014	0.46	-0.67	TRUE	FALSE	FALSE	FALSE	0.012	0.15	0.077	0.24	-0.39	0.94	1	0.48	1
thorax	II	FBgn0023477	Taldo	37804	29	4126.83	0.43	7.6e-06	0.65	0.00015	0.14	-0.48	TRUE	FALSE	FALSE	FALSE	0.14	0.46	0.18	0.41	-0.23	0.54	0.97	0.68	1
thorax	II	FBgn0040309	Jafrac1	53578	33.83	3964.87	0.66	5e-07	0.82	1.4e-05	0.039	-0.36	TRUE	FALSE	FALSE	FALSE	0.091	0.38	0.0068	0.053	0.25	0.15	0.93	0.4	1
thorax	II	FBgn0250753	kra	40680	26.04	7642.43	0.11	0.00085	0.31	0.0074	0.93	-0.23	TRUE	FALSE	FALSE	FALSE	0.47	0.76	0.47	0.71	0.38	0.61	0.98	0.041	1
thorax	II	FBgn0038038	CG5167	41521	29.83	3201.55	0.035	0.0055	0.16	0.032	0.25	-0.29	TRUE	FALSE	FALSE	FALSE	0.96	0.99	0.031	0.14	0.24	0.021	0.71	0.6	1
thorax	II	FBgn0013756	Mtor	36264	25.53	1328.52	0.052	0.0036	0.2	0.023	1.5	-0.25	TRUE	FALSE	FALSE	FALSE	0.17	0.51	0.0005	0.0091	2.8	0.85	1	0.097	1
thorax	II	FBgn0028646	aralar1	43616	24.79	3543.12	0.029	0.0086	0.14	0.045	0.97	-0.27	TRUE	FALSE	FALSE	FALSE	0.33	0.66	0.00098	0.014	1.5	0.65	0.99	0.87	1
thorax	II	FBgn0263260	sel	36046	25.18	499.22	0.062	0.0031	0.23	0.02	1.4	-0.38	TRUE	FALSE	FALSE	FALSE	0.44	0.74	0.35	0.6	0.62	0.66	0.99	0.32	1
thorax	II	FBgn0000477	DNaseII	48228	26.74	5033.97	0.38	3.8e-05	0.61	0.00059	0.17	-0.4	TRUE	FALSE	FALSE	FALSE	0.71	0.89	0.69	0.84	0.072	0.18	0.94	0.56	1
thorax	II	FBgn0038243	CG8066	41766	27.48	474.19	0.078	0.0024	0.25	0.016	1.4	-0.32	TRUE	FALSE	FALSE	FALSE	0.32	0.65	0.62	0.81	0.34	0.75	1	0.71	1
thorax	II	FBgn0011726	tsr	37841	33.1	3003.76	0.19	0.00046	0.42	0.0046	0.18	-0.38	TRUE	FALSE	FALSE	FALSE	0.27	0.6	0.83	0.92	-0.027	0.24	0.97	0.33	1
thorax	II	FBgn0039827	CG1544	43689	26.58	1000.77	0.6	5.1e-06	0.78	0.00011	0.14	-0.61	TRUE	FALSE	FALSE	FALSE	0.62	0.84	0.21	0.45	0.32	0.33	0.97	0.64	1
thorax	II	FBgn0031629	Clect27	33678	28.4	783.38	0.13	0.0013	0.34	0.01	0.44	-0.35	TRUE	FALSE	FALSE	FALSE	0.93	0.98	0.14	0.34	0.41	0.22	0.96	0.54	1
thorax	II	FBgn0001258	Ldh	45880	27.13	183.56	0.13	0.0015	0.34	0.011	0.49	-0.65	TRUE	FALSE	FALSE	FALSE	0.14	0.47	0.59	0.78	-0.16	0.76	1	0.32	1
thorax	II	FBgn0027578	CG14526	43413	28.81	2381.1	0.14	0.0014	0.36	0.011	0.23	-0.33	TRUE	FALSE	FALSE	FALSE	0.0024	0.09	0.0024	0.025	-0.5	0.96	1	0.45	1
thorax	II	FBgn0058002	ND-AGGG	3355155	32.48	9361.32	0.032	0.016	0.15	0.071	0.71	-0.26	TRUE	FALSE	FALSE	FALSE	0.015	0.17	0.16	0.38	-0.42	0.96	1	0.58	1
thorax	II	FBgn0000358	Cp19	39000	26.6	32.72	0.053	0.0094	0.2	0.048	2.1	-0.62	TRUE	FALSE	FALSE	FALSE	0.088	0.38	0.68	0.83	-0.41	0.93	1	0.87	1
thorax	II	FBgn0002284	Prosbeta6	39855	29.52	1274.95	0.16	0.0015	0.38	0.012	0.46	-0.3	TRUE	FALSE	FALSE	FALSE	0.42	0.73	0.72	0.86	0.11	0.51	0.97	0.42	1
thorax	II	FBgn0032005	Snx6	34126	27.31	1424.42	0.068	0.0074	0.23	0.04	2.1	-0.25	TRUE	FALSE	FALSE	FALSE	0.43	0.73	0.39	0.64	0.91	0.72	1	0.7	1
thorax	II	FBgn0030518	CG11134	32334	27.52	428.56	0.24	0.00097	0.47	0.0082	0.31	-0.46	TRUE	FALSE	FALSE	FALSE	0.58	0.83	0.65	0.82	0.11	0.34	0.97	0.32	1
thorax	II	FBgn0037973	CG18547	41452	25.03	424.76	0.92	1.2e-07	0.96	4.1e-06	0.087	-0.96	TRUE	FALSE	FALSE	FALSE	0.56	0.81	0.34	0.6	0.8	0.62	0.99	0.019	1
thorax	II	FBgn0020414	Idgf3	34981	28.42	6395.99	0.12	0.0052	0.33	0.03	0.34	-0.29	TRUE	FALSE	FALSE	FALSE	0.84	0.94	0.058	0.2	0.4	0.17	0.94	0.37	1
thorax	II	FBgn0005533	RpS17	39088	31.8	13724.4	0.3	0.00074	0.54	0.0066	0.13	-0.31	TRUE	FALSE	FALSE	FALSE	0.29	0.62	0.64	0.82	-0.055	0.18	0.95	0.77	1
thorax	II	FBgn0030678	CG11679	32515	25.9	251.17	0.1	0.0085	0.3	0.044	2	-0.34	TRUE	FALSE	FALSE	FALSE	0.19	0.53	0.85	0.93	-0.21	0.87	1	0.49	1
thorax	II	FBgn0017482	T3dh	37551	27.14	441.91	0.09	0.012	0.28	0.056	0.42	-0.33	TRUE	FALSE	FALSE	FALSE	0.27	0.6	0.0025	0.026	0.79	0.53	0.97	0.081	1
thorax	II	FBgn0037607	CG8036	41027	31.98	5894.95	0.83	3.9e-06	0.91	8.7e-05	0.018	-0.48	TRUE	FALSE	FALSE	FALSE	0.92	0.98	0.71	0.86	0.029	0.0055	0.7	0.39	1
thorax	II	FBgn0038652	CG7720	42257	25.93	5332.26	0.74	1.9e-05	0.87	0.00033	0.25	-0.39	TRUE	FALSE	FALSE	FALSE	0.5	0.77	0.53	0.74	-0.45	0.64	0.99	0.85	1
thorax	II	FBgn0011747	Ank	43770	28.95	5277.01	0.43	0.00051	0.65	0.0049	0.14	-0.35	TRUE	FALSE	FALSE	FALSE	0.34	0.67	0.57	0.77	-0.094	0.33	0.97	0.3	1
thorax	II	FBgn0036857	CG9629	40097	29.53	1714.7	0.59	0.00013	0.77	0.0016	0.076	-0.48	TRUE	FALSE	FALSE	FALSE	0.83	0.93	0.38	0.63	0.12	0.067	0.83	0.39	1
thorax	II	FBgn0014075	Uggt	40055	25.96	2113.35	0.57	0.00016	0.75	0.0019	0.24	-0.25	TRUE	FALSE	FALSE	FALSE	0.072	0.34	0.044	0.17	-0.85	0.9	1	0.029	1
thorax	II	FBgn0053855	His1:CG33855	3771736	34.35	2845.17	0.62	0.00011	0.79	0.0014	0.064	-0.76	TRUE	FALSE	FALSE	FALSE	0.0088	0.14	0.00016	0.0042	0.58	0.84	1	0.71	1
thorax	II	FBgn0000173	ben	32358	26.96	1045.94	0.11	0.016	0.32	0.071	0.66	-0.3	TRUE	FALSE	FALSE	FALSE	0.29	0.62	0.86	0.93	0.067	0.68	0.99	0.38	1
thorax	II	FBgn0004654	Pgd	31185	28.21	3375.42	0.27	0.0035	0.51	0.022	0.23	-0.33	TRUE	FALSE	FALSE	FALSE	0.0056	0.12	2.2e-05	0.001	1.1	0.97	1	0.29	1
thorax	II	FBgn0034061	Ufc1	36762	25.96	444.85	0.5	0.00053	0.7	0.0051	0.35	-0.41	TRUE	FALSE	FALSE	FALSE	0.28	0.61	0.38	0.63	-0.44	0.73	1	0.36	1
thorax	II	FBgn0010053	Jheh1	251984	25.47	3048.63	0.54	0.00043	0.74	0.0043	0.46	-0.39	TRUE	FALSE	FALSE	FALSE	0.35	0.68	0.46	0.69	-0.54	0.73	1	0.37	1
thorax	II	FBgn0037537	CG2767	40946	30.09	1298.83	0.56	0.00048	0.74	0.0047	0.058	-0.31	TRUE	FALSE	FALSE	FALSE	0.97	0.99	0.5	0.72	0.064	0.011	0.7	0.67	1
thorax	II	FBgn0036211	CG5946	39336	30.74	6212.78	0.17	0.014	0.4	0.065	0.19	-0.25	TRUE	FALSE	FALSE	FALSE	0.94	0.98	0.18	0.41	0.17	0.045	0.76	0.17	1
thorax	II	FBgn0260441	RpS12	39480	31.2	14382.6	0.55	0.0006	0.74	0.0056	0.096	-0.33	TRUE	FALSE	FALSE	FALSE	0.42	0.73	0.59	0.78	-0.08	0.23	0.97	0.13	1
thorax	II	FBgn0032495	CG16820	34730	26.97	214.2	0.22	0.01	0.45	0.05	0.74	-0.49	TRUE	FALSE	FALSE	FALSE	0.45	0.75	0.84	0.92	0.12	0.64	0.99	0.21	1
thorax	II	FBgn0023174	Prosbeta2	39628	29.17	1145.4	0.27	0.0077	0.51	0.041	0.34	-0.26	TRUE	FALSE	FALSE	FALSE	0.068	0.33	0.12	0.32	-0.46	0.86	1	0.11	1
thorax	II	FBgn0004638	drk	36497	28.18	1118.69	0.17	0.025	0.4	0.097	0.46	-0.24	TRUE	FALSE	FALSE	FALSE	0.012	0.15	0.019	0.1	-0.79	0.97	1	0.22	1
thorax	II	FBgn0035090	CG2736	37998	24.97	7312.04	0.84	5e-05	0.92	0.00075	0.16	-0.52	TRUE	FALSE	FALSE	FALSE	0.43	0.73	0.35	0.6	-0.73	0.69	0.99	0.29	1
thorax	II	FBgn0022361	Pur-alpha	43797	26.28	1465.06	0.38	0.0055	0.61	0.032	0.42	-0.44	TRUE	FALSE	FALSE	FALSE	0.72	0.89	0.67	0.83	0.19	0.43	0.97	0.98	1
thorax	II	FBgn0038017	CG4115	41499	27.13	37.93	0.24	0.022	0.47	0.09	1	-0.55	TRUE	FALSE	FALSE	FALSE	0.094	0.39	0.21	0.45	-1	0.92	1	0.81	1
thorax	II	FBgn0000150	awd	43739	33.03	5431.16	0.65	0.001	0.81	0.0085	0.084	-0.34	TRUE	FALSE	FALSE	FALSE	0.048	0.29	0.018	0.096	-0.45	0.77	1	0.57	1
thorax	II	FBgn0036286	CG10616	39420	25.11	466.68	0.42	0.0061	0.65	0.034	0.52	-0.35	TRUE	FALSE	FALSE	FALSE	0.78	0.91	0.66	0.82	0.27	0.46	0.97	0.61	1
thorax	II	FBgn0025700	CG5885	34314	25.56	1142.43	0.56	0.0023	0.74	0.016	0.44	-0.31	TRUE	FALSE	FALSE	FALSE	0.21	0.55	0.22	0.46	-0.88	0.83	1	0.47	1
thorax	II	FBgn0011284	RpS4	39484	32.21	23499.9	0.3	0.017	0.53	0.074	0.15	-0.22	TRUE	FALSE	FALSE	FALSE	0.99	1	0.27	0.52	0.16	0.052	0.79	0.87	1
thorax	II	FBgn0034724	babos	37557	27.44	1497.67	0.67	0.00099	0.82	0.0083	0.12	-0.34	TRUE	FALSE	FALSE	FALSE	0.95	0.98	0.58	0.78	0.15	0.21	0.96	0.7	1
thorax	II	FBgn0038972	CG7054	42643	27.83	280.58	0.62	0.0021	0.79	0.015	0.082	-0.49	TRUE	FALSE	FALSE	FALSE	0.13	0.45	0.095	0.28	-0.27	0.53	0.97	0.26	1
thorax	II	FBgn0025724	beta'COP	45757	28.04	2347	0.69	0.0014	0.84	0.011	0.097	-0.3	TRUE	FALSE	FALSE	FALSE	0.38	0.7	0.4	0.65	-0.2	0.44	0.97	0.15	1
thorax	II	FBgn0026439	Eaat1	34251	28.04	8256.04	0.41	0.012	0.64	0.058	0.36	-0.25	TRUE	FALSE	FALSE	FALSE	0.25	0.59	0.41	0.65	-0.34	0.73	1	0.81	1
thorax	II	FBgn0036847	CNPYb	40084	26.38	283.79	0.6	0.0031	0.78	0.02	0.12	-0.36	TRUE	FALSE	FALSE	FALSE	0.36	0.69	0.071	0.23	0.4	0.42	0.97	0.11	1
thorax	II	FBgn0051205	CG31205	318626	26.38	4771.31	0.5	0.0073	0.7	0.039	0.26	-0.37	TRUE	FALSE	FALSE	FALSE	0.91	0.97	0.58	0.78	0.2	0.29	0.97	0.69	1
thorax	II	FBgn0032216	Usp14	34387	25.4	887.09	0.35	0.02	0.59	0.085	0.38	-0.27	TRUE	FALSE	FALSE	FALSE	0.21	0.55	0.39	0.64	-0.33	0.75	1	0.47	1
thorax	II	FBgn0000239	bur	45830	24.74	2077.95	0.79	0.0013	0.89	0.01	0.11	-0.22	TRUE	FALSE	FALSE	FALSE	0.051	0.29	0.013	0.08	-1	0.92	1	0.46	1
thorax	II	FBgn0028988	Spn42Dd	49808	29.59	1593.53	0.61	0.0063	0.78	0.035	0.093	-0.24	TRUE	FALSE	FALSE	FALSE	0.079	0.36	0.044	0.17	-0.37	0.69	0.99	0.36	1
thorax	II	FBgn0004926	eIF2beta	39433	27.76	1848.57	0.55	0.012	0.74	0.059	0.17	-0.29	TRUE	FALSE	FALSE	FALSE	0.24	0.58	0.027	0.13	0.63	0.62	0.99	0.75	1
thorax	II	FBgn0015575	alpha-Est7	40901	29.41	5873.57	0.82	0.0015	0.91	0.011	0.027	-0.35	TRUE	FALSE	FALSE	FALSE	0.9	0.97	0.67	0.83	0.048	0.032	0.76	0.61	1
thorax	II	FBgn0044510	mRpS5	3355089	26.33	4517.16	0.64	0.0092	0.81	0.047	0.12	-0.46	TRUE	FALSE	FALSE	FALSE	0.026	0.22	0.0073	0.055	-0.76	0.92	1	0.58	1
thorax	II	FBgn0022224	ubl	35592	25.05	190	0.55	0.018	0.74	0.077	0.38	-0.34	TRUE	FALSE	FALSE	FALSE	0.12	0.42	0.0074	0.055	1.8	0.89	1	0.92	1
thorax	II	FBgn0026380	Prosbeta3	41079	24.3	1095.51	0.66	0.01	0.82	0.051	0.25	-0.23	TRUE	FALSE	FALSE	FALSE	0.57	0.82	0.71	0.86	-0.19	0.55	0.97	0.69	1
thorax	II	FBgn0034361	mRpS28	37136	26.11	134.54	0.64	0.016	0.8	0.072	0.39	-0.4	TRUE	FALSE	FALSE	FALSE	0.58	0.83	0.2	0.44	1	0.6	0.98	0.27	1
thorax	II	FBgn0037354	CG12171	40690	28.11	469.39	0.95	0.00043	0.98	0.0043	0.013	-0.5	TRUE	FALSE	FALSE	FALSE	0.46	0.75	0.25	0.51	0.22	0.31	0.97	0.25	1
thorax	II	FBgn0031992	CG8498	34111	30.97	316.96	0.73	0.014	0.86	0.063	0.052	-0.32	TRUE	FALSE	FALSE	FALSE	0.53	0.8	0.59	0.78	-0.077	0.15	0.93	0.29	1
thorax	II	FBgn0034368	zda	37144	26.72	1560.77	0.85	0.0066	0.92	0.036	0.088	-0.28	TRUE	FALSE	FALSE	FALSE	0.78	0.91	0.84	0.92	-0.089	0.4	0.97	0.42	1
thorax	II	FBgn0063493	GstE7	37112	25.76	419.16	0.91	0.005	0.95	0.029	0.063	-0.49	TRUE	FALSE	FALSE	FALSE	0.11	0.41	0.032	0.14	-1.2	0.88	1	0.32	1
thorax	II	FBgn0025592	Gk1	43913	27.6	3376.16	0.94	0.0029	0.97	0.019	0.027	-0.33	TRUE	FALSE	FALSE	FALSE	0.87	0.95	0.76	0.88	0.11	0.31	0.97	0.57	1
thorax	II	FBgn0262601	SmB	34426	24.99	233.73	0.82	0.024	0.91	0.094	0.19	-0.35	TRUE	FALSE	FALSE	FALSE	0.8	0.92	0.54	0.75	0.49	0.48	0.97	0.64	1
thorax	II	FBgn0038037	Cyp9f2	41520	26.01	8561.86	0.92	0.0082	0.96	0.043	0.047	-0.27	TRUE	FALSE	FALSE	FALSE	0.66	0.87	0.58	0.78	-0.26	0.48	0.97	0.21	1
thorax	II	FBgn0051549	CG31549	40689	25.39	492.59	0.87	0.023	0.94	0.093	0.1	-0.34	TRUE	FALSE	FALSE	FALSE	0.84	0.94	0.64	0.82	0.28	0.43	0.97	0.89	1
thorax	II	FBgn0028694	Rpn11	33738	26.81	902.57	0.99	0.006	0.99	0.034	0.0035	-0.31	TRUE	FALSE	FALSE	FALSE	0.72	0.89	0.59	0.78	0.11	0.23	0.97	0.27	1
thorax	II	FBgn0034401	MetRS	37177	26.43	902.55	0.99	0.019	1	0.079	0.0015	-0.25	TRUE	FALSE	FALSE	FALSE	0.25	0.59	0.1	0.29	0.34	0.5	0.97	0.31	1
thorax	II	FBgn0010411	RpS18	37292	32.55	21422.8	1	0.017	1	0.075	0.00049	-0.17	TRUE	FALSE	FALSE	FALSE	0.75	0.9	0.64	0.82	0.062	0.082	0.84	0.2	1
thorax	III	FBgn0022355	Tsf1	32821	32.92	24363.3	9.7e-11	3.6e-11	1.1e-07	3.4e-09	-1.5	-1.1	FALSE	FALSE	FALSE	FALSE	1.1e-05	0.0051	1.3e-05	0.00068	-0.61	1	1	0.12	1
thorax	III	FBgn0034468	Obp56a	37264	30.33	1609.9	3e-08	3.5e-67	1.2e-05	1.7e-63	-2	-1.8	FALSE	FALSE	FALSE	TRUE	0.11	0.42	5.7e-07	6.5e-05	-1.6	0.69	0.99	2.1e-05	0.013
thorax	III	FBgn0032286	CG7300	34472	25.51	753.42	0.00015	4.5e-56	0.0071	1.1e-52	-2.3	-1.9	FALSE	FALSE	FALSE	FALSE	0.71	0.89	2.7e-05	0.0012	-2.5	0.44	0.97	0.46	1
thorax	III	FBgn0027584	CG4757	41330	27.33	4649.5	0.00018	5.3e-27	0.0082	4e-24	-3.9	-1.9	FALSE	FALSE	FALSE	TRUE	0.47	0.76	1.2e-05	0.00067	-4.7	0.66	0.99	4.8e-06	0.005
thorax	III	FBgn0033593	Listericin	36183	28.41	348.76	0.00028	1e-27	0.01	8.3e-25	-2.8	-1.9	FALSE	FALSE	FALSE	TRUE	0.015	0.17	0.38	0.63	-0.52	0.98	1	0.00019	0.066
thorax	III	FBgn0041711	yellow-e	41653	28.54	1359.02	0.003	3e-17	0.04	8.5e-15	-0.59	-1.2	FALSE	FALSE	FALSE	FALSE	0.72	0.89	0.0059	0.048	-0.51	0.15	0.93	0.12	1
thorax	III	FBgn0034470	Obp56d	37266	31.95	5747.68	0.061	1e-19	0.22	4.1e-17	-0.29	-1.2	FALSE	FALSE	FALSE	FALSE	0.97	0.99	0.043	0.17	-0.29	0.053	0.8	0.086	1
thorax	III	FBgn0042119	Cpr65Au	59158	33.45	3678.45	0.4	7.1e-67	0.63	2.3e-63	-0.28	-1.3	FALSE	FALSE	FALSE	FALSE	0.45	0.75	0.058	0.2	-0.63	0.51	0.97	0.097	1
thorax	III	FBgn0027586	CG5867	34728	27.58	3927.95	0.48	6.2e-20	0.69	2.7e-17	-0.22	-0.97	FALSE	FALSE	FALSE	FALSE	0.011	0.15	0.00014	0.004	-1.4	0.97	1	0.32	1
thorax	III	FBgn0011695	EbpIII	49821	33.36	18647.6	2.1e-05	1.4e-12	0.0018	1.7e-10	-0.79	-0.58	FALSE	FALSE	FALSE	FALSE	0.31	0.64	0.00023	0.0055	-0.6	0.22	0.97	0.02	1
thorax	III	FBgn0050163	Cpr60D	246492	28.15	82.42	0.00023	1.3e-09	0.0094	8.2e-08	-1.2	-1.2	FALSE	FALSE	FALSE	FALSE	0.54	0.8	0.00088	0.013	-1	0.38	0.97	0.052	1
thorax	III	FBgn0033603	Cpr47Ef	36194	32.39	171.84	0.0027	9.2e-11	0.037	7.8e-09	-0.61	-1.1	FALSE	FALSE	FALSE	FALSE	0.085	0.37	7.2e-06	0.00047	-1	0.65	0.99	0.23	1
thorax	III	FBgn0028526	CG15293	34828	30.94	7081.93	0.0016	1.2e-09	0.028	7.7e-08	-0.4	-0.63	FALSE	FALSE	FALSE	FALSE	0.054	0.3	0.34	0.6	-0.098	0.4	0.97	0.055	1
thorax	III	FBgn0030932	Ggt-1	32839	24.23	1558.3	0.019	7.2e-12	0.12	8.1e-10	-1.5	-0.78	FALSE	FALSE	FALSE	FALSE	0.23	0.57	0.36	0.61	-0.53	0.79	1	0.076	1
thorax	III	FBgn0034967	eEF5	37846	30.39	17040.3	0.013	3.2e-11	0.094	3.1e-09	-0.35	-0.61	FALSE	FALSE	TRUE	FALSE	0.6	0.84	0.047	0.18	-0.25	0.085	0.84	0.28	1
thorax	III	FBgn0038924	CG6028	42589	31.37	1219.27	0.0096	2.4e-10	0.077	1.9e-08	-0.41	-0.68	FALSE	FALSE	FALSE	FALSE	0.22	0.56	0.22	0.47	-0.17	0.31	0.97	0.025	1
thorax	III	FBgn0261599	RpS29	41200	30.32	17532.7	0.019	5.9e-11	0.11	5.2e-09	-0.39	-0.6	FALSE	FALSE	FALSE	FALSE	0.12	0.44	0.69	0.85	-0.057	0.49	0.97	0.43	1
thorax	III	FBgn0000299	Col4a1	33727	32.13	7914.55	0.011	2.7e-10	0.085	2e-08	-0.42	-0.44	FALSE	FALSE	FALSE	FALSE	0.53	0.79	0.053	0.19	-0.29	0.16	0.93	0.16	1
thorax	III	FBgn0024733	RpL10	43864	31.58	34894.7	0.043	2e-11	0.18	2.1e-09	-0.29	-0.67	FALSE	FALSE	FALSE	FALSE	0.0092	0.14	0.065	0.22	0.24	0.85	1	0.23	1
thorax	III	FBgn0013770	Cp1	36546	31.09	12665.3	0.00045	4.8e-07	0.013	1.4e-05	-0.45	-0.41	FALSE	FALSE	TRUE	FALSE	0.48	0.76	0.0025	0.026	-0.35	0.06	0.8	0.65	1
thorax	III	FBgn0036750	CG6034	39974	24.37	131.68	0.24	4e-14	0.47	7.1e-12	-0.95	-1.9	FALSE	FALSE	FALSE	FALSE	0.59	0.83	0.63	0.81	-0.36	0.59	0.98	0.4	1
thorax	III	FBgn0004240	DptA	37183	25.77	166.14	8.2e-05	7.9e-06	0.005	0.00016	-2.7	-1.2	FALSE	FALSE	FALSE	FALSE	0.26	0.59	1.8e-06	0.00015	-3.6	0.75	1	0.00053	0.16
thorax	III	FBgn0027843	CAH2	39390	26.82	2075.7	0.00013	5.4e-06	0.0068	0.00011	-1.1	-0.61	FALSE	FALSE	FALSE	FALSE	0.02	0.19	0.15	0.37	-0.31	0.92	1	0.35	1
thorax	III	FBgn0026777	Rad23	43785	27.66	1667.82	0.00039	5.7e-06	0.012	0.00012	-2.1	-0.39	FALSE	FALSE	FALSE	FALSE	0.016	0.17	0.44	0.67	-0.37	0.98	1	0.024	1
thorax	III	FBgn0022708	Adk2	37834	33.59	1116.69	0.00028	1.1e-05	0.01	0.00021	-0.44	-0.43	FALSE	FALSE	FALSE	FALSE	0.018	0.18	0.32	0.58	-0.093	0.53	0.97	0.26	1
thorax	III	FBgn0041182	Tep2	34044	28.01	7790.38	0.18	8e-12	0.41	8.9e-10	-0.25	-0.52	FALSE	FALSE	FALSE	FALSE	0.02	0.19	7.7e-05	0.0028	-0.87	0.87	1	0.0014	0.29
thorax	III	FBgn0026403	Ndg	36089	29.68	1052.23	0.57	3.9e-15	0.75	8.3e-13	-0.11	-0.82	FALSE	FALSE	FALSE	FALSE	0.32	0.65	0.051	0.19	-0.36	0.37	0.97	0.31	1
thorax	III	FBgn0263231	bel	45826	28.97	2361.1	1.3e-06	0.004	0.00025	0.024	-1.3	-0.23	FALSE	TRUE	FALSE	FALSE	1.4e-05	0.0051	0.32	0.58	0.17	1	1	0.16	1
thorax	III	FBgn0039486	caix	43264	29.26	1184.26	3.5e-07	0.0088	8.9e-05	0.045	-1.3	-0.29	FALSE	FALSE	FALSE	FALSE	0.00089	0.054	0.015	0.086	-0.41	0.99	1	0.65	1
thorax	III	FBgn0250848	26-29-p	39547	29.55	3695.36	0.00028	7.8e-05	0.01	0.0011	-0.64	-0.43	FALSE	FALSE	TRUE	FALSE	0.74	0.9	0.00044	0.0085	-0.58	0.087	0.85	0.035	1
thorax	III	FBgn0040582	CG5791	50055	30.84	1569.33	0.0065	1e-06	0.062	2.6e-05	-0.78	-0.8	FALSE	FALSE	FALSE	FALSE	0.46	0.75	0.0004	0.0081	-1	0.41	0.97	0.84	1
thorax	III	FBgn0064225	RpL5	3355124	32.2	59522	0.014	5.7e-07	0.095	1.6e-05	-0.31	-0.41	FALSE	FALSE	FALSE	FALSE	0.0061	0.12	0.12	0.31	0.17	0.81	1	0.48	1
thorax	III	FBgn0033101	CG9436	35586	28.24	1169.64	0.43	3.8e-12	0.65	4.5e-10	-0.24	-0.84	FALSE	FALSE	FALSE	FALSE	0.78	0.91	0.66	0.82	-0.13	0.3	0.97	0.67	1
thorax	III	FBgn0039238	CG7016	42968	25.66	414.32	0.11	5.5e-09	0.31	3e-07	-0.46	-0.67	FALSE	FALSE	FALSE	FALSE	0.079	0.36	0.00032	0.0068	-1.2	0.82	1	0.083	1
thorax	III	FBgn0036208	CG10361	39333	26.1	300.97	0.48	2.8e-12	0.69	3.4e-10	-0.54	-1.2	FALSE	FALSE	FALSE	FALSE	0.21	0.55	0.016	0.09	-1.9	0.83	1	0.63	1
thorax	III	FBgn0053493	CG33493	2768994	26.01	227.64	0.16	2e-09	0.38	1.2e-07	-1.1	-1.1	FALSE	FALSE	FALSE	FALSE	0.037	0.25	0.1	0.29	1.2	0.96	1	0.65	1
thorax	III	FBgn0032774	CG17549	35212	29.67	2825.55	0.26	2.6e-10	0.49	1.9e-08	-0.22	-0.57	FALSE	FALSE	FALSE	FALSE	0.48	0.76	0.034	0.15	-0.41	0.28	0.97	0.0051	0.66
thorax	III	FBgn0031561	IM33	33592	29.77	7840.31	0.11	1.1e-08	0.31	5.6e-07	-0.39	-0.71	FALSE	FALSE	FALSE	FALSE	0.66	0.87	0.26	0.52	-0.25	0.26	0.97	0.64	1
thorax	III	FBgn0040349	CG3699	31046	27.66	553.64	0.26	4.2e-10	0.5	2.9e-08	-0.34	-1.4	FALSE	FALSE	FALSE	FALSE	0.55	0.81	0.049	0.18	-0.59	0.41	0.97	0.32	1
thorax	III	FBgn0034331	CG15067	37102	30.5	1811.25	0.17	5.8e-09	0.39	3.1e-07	-0.26	-0.85	FALSE	FALSE	FALSE	FALSE	0.048	0.29	0.00025	0.0058	-0.79	0.77	1	0.36	1
thorax	III	FBgn0033912	RpS23	36576	32.86	36583.9	0.012	8.1e-06	0.087	0.00016	-0.3	-0.37	FALSE	FALSE	FALSE	FALSE	0.031	0.23	0.66	0.82	0.045	0.51	0.97	0.77	1
thorax	III	FBgn0026666	MagR	32513	29.38	2220.34	0.0012	0.00021	0.023	0.0024	-0.65	-0.38	FALSE	FALSE	FALSE	FALSE	0.67	0.87	0.003	0.029	-0.55	0.15	0.93	0.64	1
thorax	III	FBgn0030362	regucalcin	32165	33.92	7671.49	0.02	4.9e-06	0.12	0.00011	-0.31	-0.59	FALSE	FALSE	FALSE	FALSE	0.82	0.93	0.0072	0.054	-0.35	0.044	0.76	0.44	1
thorax	III	FBgn0052667	ssp7	318146	24.93	1457.68	0.0053	4.6e-05	0.057	0.00069	-2.4	-0.49	FALSE	FALSE	FALSE	FALSE	0.017	0.18	0.66	0.83	0.31	0.98	1	0.99	1
thorax	III	FBgn0010408	RpS9	39108	31.32	21018.7	0.39	3e-10	0.62	2.2e-08	-0.11	-0.65	FALSE	FALSE	FALSE	FALSE	0.083	0.36	0.097	0.28	0.2	0.41	0.97	0.72	1
thorax	III	FBgn0024289	Sodh-1	40836	28.94	1417.74	0.094	2.9e-07	0.29	9e-06	-0.42	-0.68	FALSE	FALSE	FALSE	FALSE	0.0062	0.12	0.016	0.09	0.6	0.97	1	0.65	1
thorax	III	FBgn0002593	RpLP1	33214	32.14	25418.8	0.045	2.3e-06	0.19	5.3e-05	-0.23	-0.42	FALSE	FALSE	FALSE	FALSE	0.28	0.62	0.5	0.73	-0.069	0.12	0.92	0.88	1
thorax	III	FBgn0032889	CG9331	35347	31.3	1219.88	0.00081	0.0011	0.018	0.0089	-0.61	-0.43	FALSE	FALSE	FALSE	FALSE	0.072	0.34	0.15	0.36	-0.22	0.61	0.98	0.4	1
thorax	III	FBgn0004403	RpS14a	47218	32.92	19220.4	0.0067	0.00011	0.062	0.0015	-0.33	-0.34	FALSE	FALSE	FALSE	FALSE	0.073	0.34	0.62	0.81	-0.05	0.34	0.97	0.42	1
thorax	III	FBgn0002626	RpL32	43573	31.8	16604.3	0.0049	0.00029	0.055	0.0031	-0.51	-0.33	FALSE	FALSE	FALSE	FALSE	0.0004	0.045	0.0084	0.06	0.44	0.99	1	0.69	1
thorax	III	FBgn0050069	CG30069	36573	31.64	12735.7	0.18	2e-07	0.41	6.5e-06	-0.14	-0.49	FALSE	FALSE	FALSE	FALSE	0.91	0.97	0.21	0.45	-0.12	0.015	0.7	0.083	1
thorax	III	FBgn0260746	Ect3	41457	25.46	516.67	0.16	3.1e-07	0.39	9.7e-06	-0.55	-0.67	FALSE	FALSE	FALSE	FALSE	0.47	0.75	0.018	0.096	-0.93	0.53	0.97	0.27	1
thorax	III	FBgn0032773	fon	35211	32.16	9083.35	0.0037	0.00065	0.046	0.006	-0.5	-0.47	FALSE	FALSE	FALSE	FALSE	0.0054	0.11	0.3	0.55	0.15	0.93	1	0.3	1
thorax	III	FBgn0033906	ReepB	36569	29.36	2802.21	0.0026	0.0012	0.037	0.0096	-0.67	-0.32	FALSE	FALSE	FALSE	FALSE	0.092	0.38	0.27	0.52	-0.21	0.69	0.99	0.16	1
thorax	III	FBgn0032518	RpL24	34754	31.62	16646	0.069	8.1e-06	0.24	0.00016	-0.28	-0.39	FALSE	FALSE	FALSE	FALSE	0.56	0.81	0.25	0.5	-0.16	0.13	0.92	0.8	1
thorax	III	FBgn0010078	RpL23	37628	32.3	21653.3	0.00039	0.0074	0.012	0.04	-0.48	-0.2	FALSE	FALSE	FALSE	FALSE	0.066	0.33	0.087	0.26	-0.19	0.38	0.97	0.99	1
thorax	III	FBgn0028697	RpL15	3354918	29.93	26928.4	0.71	1.1e-10	0.85	9.1e-09	-0.066	-0.59	FALSE	FALSE	FALSE	FALSE	0.29	0.62	0.25	0.5	0.2	0.38	0.97	0.23	1
thorax	III	FBgn0027108	Inx2	31646	28.08	1222.55	0.0069	0.00047	0.063	0.0046	-0.87	-0.36	FALSE	FALSE	FALSE	FALSE	0.41	0.73	0.057	0.2	-0.55	0.49	0.97	0.97	1
thorax	III	FBgn0043578	PGRP-SB1	39870	27.5	754.07	0.00084	0.0046	0.018	0.028	-2.4	-0.45	FALSE	FALSE	FALSE	FALSE	0.5	0.77	0.0043	0.037	-1.8	0.6	0.98	0.34	1
thorax	III	FBgn0034443	cer	37229	29.13	575.28	0.035	6.2e-05	0.16	0.00089	-0.4	-0.5	FALSE	FALSE	FALSE	FALSE	0.00097	0.054	0.0035	0.033	0.55	0.99	1	0.7	1
thorax	III	FBgn0035964	Dhpr	39050	31.44	899.93	0.23	5.1e-07	0.47	1.4e-05	-0.2	-0.47	FALSE	FALSE	FALSE	FALSE	0.75	0.91	0.094	0.28	-0.28	0.13	0.92	0.95	1
thorax	III	FBgn0002121	l(2)gl	33156	26.5	4581.61	0.47	1.5e-08	0.69	7.3e-07	-0.22	-0.65	FALSE	FALSE	FALSE	FALSE	0.69	0.88	0.86	0.93	-0.051	0.35	0.97	0.018	1
thorax	III	FBgn0266369	Mtp	35362	28.3	2566.42	0.12	5.3e-06	0.32	0.00011	-0.26	-0.37	FALSE	FALSE	FALSE	FALSE	0.68	0.87	0.27	0.53	-0.17	0.13	0.92	0.018	1
thorax	III	FBgn0040007	RpL38	3355144	31.42	8284.69	0.028	0.00015	0.14	0.0018	-0.42	-0.55	FALSE	FALSE	FALSE	FALSE	0.035	0.25	0.45	0.68	0.13	0.8	1	0.49	1
thorax	III	FBgn0025885	Inos	35671	31.25	8227.28	0.0068	0.0011	0.063	0.0093	-0.4	-0.36	FALSE	FALSE	FALSE	FALSE	0.42	0.73	0.00035	0.0074	-0.54	0.14	0.93	0.0095	0.83
thorax	III	FBgn0037930	CG14715	41403	26.82	237.64	0.43	5e-08	0.65	2e-06	-0.37	-0.95	FALSE	FALSE	FALSE	FALSE	0.42	0.73	0.055	0.2	-0.89	0.61	0.98	0.2	1
thorax	III	FBgn0026415	Idgf4	31926	33.06	12343.6	0.00035	0.018	0.011	0.077	-0.45	-0.18	FALSE	FALSE	FALSE	FALSE	0.0057	0.12	0.9	0.95	-0.013	0.76	1	0.38	1
thorax	III	FBgn0011016	SsRbeta	39768	28.87	1142.92	0.016	0.00043	0.1	0.0043	-1.2	-0.34	FALSE	FALSE	FALSE	FALSE	0.065	0.33	0.97	0.99	0.015	0.91	1	0.36	1
thorax	III	FBgn0036759	CG5577	39985	24.65	831.85	0.0074	0.0013	0.065	0.01	-1.6	-0.38	FALSE	FALSE	FALSE	FALSE	0.058	0.31	0.79	0.9	-0.14	0.93	1	0.89	1
thorax	III	FBgn0043841	vir-1	34652	26.62	8968.96	0.076	3e-05	0.25	0.00049	-0.85	-0.35	FALSE	FALSE	FALSE	FALSE	1	1	0.061	0.21	-0.85	0.29	0.97	0.84	1
thorax	III	FBgn0030737	CG9914	32592	29.43	1563.4	0.11	1.6e-05	0.31	0.00028	-0.44	-0.72	FALSE	FALSE	FALSE	FALSE	0.19	0.53	0.84	0.92	0.051	0.66	0.99	1	1
thorax	III	FBgn0035121	Tudor-SN	38045	32.17	3296.91	0.0086	0.0017	0.072	0.013	-0.31	-0.36	FALSE	FALSE	FALSE	FALSE	0.094	0.39	0.58	0.77	-0.055	0.27	0.97	0.21	1
thorax	III	FBgn0038610	CG7675	42211	29.47	1556.43	0.0095	0.0015	0.077	0.012	-0.89	-0.39	FALSE	FALSE	FALSE	FALSE	0.24	0.57	0.21	0.45	-0.38	0.66	0.99	0.27	1
thorax	III	FBgn0029785	RpL35	31483	30.73	17436.4	0.0046	0.0035	0.053	0.022	-0.68	-0.27	FALSE	FALSE	FALSE	FALSE	0.053	0.3	0.67	0.83	-0.084	0.81	1	0.66	1
thorax	III	FBgn0053123	LeuRS	326262	28.56	1020.14	0.094	4.8e-05	0.29	0.00072	-2.7	-0.48	FALSE	FALSE	FALSE	FALSE	0.14	0.47	0.73	0.87	0.51	0.91	1	0.19	1
thorax	III	FBgn0037723	SpdS	41167	26.51	1340.08	0.8	7.3e-10	0.9	5e-08	-0.11	-0.86	FALSE	FALSE	FALSE	FALSE	0.22	0.56	0.13	0.33	0.66	0.76	1	0.059	1
thorax	III	FBgn0035147	Gale	38076	28.97	3585.76	0.0013	0.015	0.025	0.067	-0.73	-0.3	FALSE	FALSE	FALSE	FALSE	0.01	0.14	0.88	0.95	0.026	0.94	1	0.91	1
thorax	III	FBgn0020389	Papss	40167	25.33	1069.9	0.051	0.00023	0.2	0.0026	-1.2	-0.42	FALSE	FALSE	FALSE	FALSE	0.95	0.98	0.049	0.18	-1.2	0.37	0.97	0.7	1
thorax	III	FBgn0031256	shv	33220	28.79	985.52	0.25	4.1e-06	0.49	9e-05	-0.29	-0.46	FALSE	FALSE	FALSE	FALSE	0.14	0.47	0.35	0.6	0.23	0.7	0.99	0.022	1
thorax	III	FBgn0017579	RpL14	38983	32.87	18048	0.079	0.00011	0.26	0.0014	-0.23	-0.28	FALSE	FALSE	FALSE	FALSE	0.063	0.32	0.37	0.63	0.11	0.5	0.97	0.95	1
thorax	III	FBgn0010225	Gel	46008	30.65	13866	0.22	9.3e-06	0.45	0.00018	-0.18	-0.31	FALSE	FALSE	FALSE	FALSE	0.02	0.19	0.03	0.14	0.31	0.77	1	0.42	1
thorax	III	FBgn0022097	Vha36-1	44702	32.33	4163.83	0.0011	0.024	0.022	0.096	-0.41	-0.23	FALSE	FALSE	FALSE	FALSE	0.023	0.2	0.62	0.81	-0.05	0.56	0.97	0.63	1
thorax	III	FBgn0020415	Idgf2	34979	29.43	7297.84	0.019	0.0016	0.12	0.012	-0.42	-0.33	FALSE	FALSE	FALSE	FALSE	0.96	0.99	0.012	0.075	-0.44	0.082	0.84	0.58	1
thorax	III	FBgn0039326	CG10562	43066	25.64	1130.47	0.42	9.6e-07	0.64	2.5e-05	-0.43	-0.69	FALSE	FALSE	FALSE	FALSE	0.89	0.96	0.3	0.55	-0.53	0.37	0.97	0.22	1
thorax	III	FBgn0032494	CG5945	34729	30.59	11587.2	0.19	2.4e-05	0.42	0.0004	-0.18	-0.47	FALSE	FALSE	FALSE	FALSE	0.7	0.89	0.061	0.21	-0.26	0.084	0.84	0.11	1
thorax	III	FBgn0034743	RpS16	37580	31.6	20181	0.36	3.1e-06	0.59	7e-05	-0.12	-0.43	FALSE	FALSE	FALSE	FALSE	0.0064	0.12	0.0026	0.026	0.42	0.87	1	0.82	1
thorax	III	FBgn0037890	CG17734	41359	30.61	1280.52	0.0018	0.024	0.031	0.096	-0.7	-0.27	FALSE	FALSE	FALSE	FALSE	0.83	0.93	0.0023	0.025	-0.64	0.15	0.93	0.53	1
thorax	III	FBgn0031418	CG3609	33421	31.2	659.05	0.023	0.0021	0.13	0.015	-0.33	-0.39	FALSE	FALSE	FALSE	FALSE	0.78	0.91	0.039	0.16	-0.28	0.062	0.81	0.11	1
thorax	III	FBgn0035753	RpL18	38794	31.79	10226.9	0.048	0.00071	0.19	0.0065	-0.3	-0.27	FALSE	FALSE	FALSE	FALSE	0.046	0.28	0.4	0.65	0.12	0.66	0.99	0.63	1
thorax	III	FBgn0003942	RpS27A	34420	34.58	26363.6	0.088	0.00023	0.27	0.0026	-0.19	-0.37	FALSE	FALSE	FALSE	FALSE	0.66	0.87	0.02	0.1	-0.25	0.033	0.76	0.91	1
thorax	III	FBgn0058042	Tim23	3355096	28.57	1545.27	0.0027	0.019	0.037	0.081	-0.62	-0.24	FALSE	FALSE	TRUE	FALSE	0.95	0.99	0.0021	0.024	-0.61	0.1	0.89	0.78	1
thorax	III	FBgn0011672	Mvl	42490	25.85	1695.49	0.036	0.0012	0.17	0.0099	-1.8	-0.25	FALSE	FALSE	FALSE	FALSE	0.039	0.26	0.41	0.66	0.63	0.96	1	0.28	1
thorax	III	FBgn0029990	CG2233	31721	31.38	76691.1	0.11	0.00018	0.31	0.0021	-0.2	-0.46	FALSE	FALSE	FALSE	FALSE	0.54	0.8	0.015	0.087	-0.31	0.083	0.84	0.44	1
thorax	III	FBgn0030239	CG17333	32013	28.65	719.66	0.18	5.6e-05	0.41	0.00082	-0.33	-0.49	FALSE	FALSE	FALSE	FALSE	0.19	0.54	0.63	0.81	0.11	0.62	0.99	0.3	1
thorax	III	FBgn0033268	Obp44a	35789	31.16	1665.64	0.09	0.00032	0.28	0.0034	-0.29	-0.38	FALSE	FALSE	FALSE	FALSE	0.45	0.75	0.0077	0.056	-0.46	0.23	0.97	0.042	1
thorax	III	FBgn0013325	RpL11	37235	30.67	18410	0.55	6.1e-07	0.74	1.6e-05	-0.16	-0.38	FALSE	FALSE	FALSE	FALSE	0.24	0.58	0.28	0.53	0.28	0.6	0.98	0.81	1
thorax	III	FBgn0000715	FMRFa	36030	28.77	483.49	0.04	0.0015	0.17	0.011	-0.59	-0.42	FALSE	FALSE	FALSE	FALSE	0.18	0.53	0.74	0.87	-0.083	0.67	0.99	0.38	1
thorax	III	FBgn0004432	Cyp1	32595	34.19	8193.13	0.21	4.9e-05	0.44	0.00073	-0.16	-0.37	FALSE	FALSE	FALSE	FALSE	0.099	0.4	0.27	0.52	0.13	0.39	0.97	0.6	1
thorax	III	FBgn0039713	RpS8	43532	33.01	25661.3	0.048	0.0012	0.19	0.0098	-0.25	-0.22	FALSE	FALSE	FALSE	FALSE	0.32	0.65	0.46	0.69	-0.085	0.15	0.93	0.61	1
thorax	III	FBgn0036887	CG9231	40130	31.04	3159.89	0.0056	0.017	0.059	0.074	-0.5	-0.24	FALSE	FALSE	FALSE	FALSE	0.23	0.57	7.8e-05	0.0028	-0.78	0.38	0.97	0.088	1
thorax	III	FBgn0265297	pAbp	37070	32.39	18088.2	0.077	0.00072	0.25	0.0065	-0.17	-0.32	FALSE	FALSE	FALSE	FALSE	0.15	0.47	0.83	0.92	0.018	0.12	0.91	0.76	1
thorax	III	FBgn0265048	cv-d	41921	24.77	2196.62	0.13	0.00036	0.34	0.0037	-0.59	-0.33	FALSE	FALSE	FALSE	FALSE	0.32	0.65	0.0056	0.046	-1.1	0.64	0.99	0.72	1
thorax	III	FBgn0039682	Obp99c	43494	31.28	11013.4	0.022	0.0076	0.13	0.041	-0.42	-0.34	FALSE	FALSE	FALSE	FALSE	0.19	0.53	0.5	0.73	-0.11	0.45	0.97	0.15	1
thorax	III	FBgn0030136	RpS28b	31897	32.29	17337.3	0.26	7.6e-05	0.5	0.0011	-0.17	-0.32	FALSE	FALSE	FALSE	FALSE	0.62	0.85	0.62	0.8	-0.07	0.12	0.92	0.73	1
thorax	III	FBgn0261602	RpL8	44251	33.3	20679.1	0.056	0.003	0.21	0.02	-0.27	-0.22	FALSE	FALSE	FALSE	FALSE	0.05	0.29	0.38	0.63	0.11	0.6	0.98	0.75	1
thorax	III	FBgn0261606	RpL27A	33654	32.56	28150.2	0.045	0.0042	0.19	0.025	-0.3	-0.26	FALSE	FALSE	FALSE	FALSE	0.72	0.89	0.097	0.28	-0.23	0.085	0.84	0.42	1
thorax	III	FBgn0039678	Obp99a	43488	28.84	2615.42	0.25	0.00015	0.49	0.0018	-0.32	-0.61	FALSE	FALSE	FALSE	FALSE	0.015	0.17	0.016	0.089	0.69	0.95	1	0.49	1
thorax	III	FBgn0033320	CG8586	35854	25.44	4598.9	0.33	8.4e-05	0.57	0.0011	-0.7	-0.39	FALSE	FALSE	FALSE	FALSE	0.54	0.8	0.064	0.22	-1.3	0.61	0.98	0.34	1
thorax	III	FBgn0032596	Prosbeta4	34999	25.99	771.7	0.15	0.00081	0.37	0.0071	-1.5	-0.36	FALSE	FALSE	FALSE	FALSE	0.18	0.53	0.0022	0.024	-3.4	0.86	1	0.24	1
thorax	III	FBgn0015756	RpL9	34526	29.12	19177.3	0.42	4e-05	0.64	0.00062	-0.16	-0.31	FALSE	FALSE	FALSE	FALSE	0.66	0.87	0.83	0.92	-0.04	0.21	0.96	0.76	1
thorax	III	FBgn0005391	Yp2	31938	36.09	381992	0.78	4.9e-07	0.89	1.4e-05	-0.028	-0.63	FALSE	FALSE	FALSE	FALSE	1.2e-05	0.0051	1.6e-07	2.7e-05	0.79	1	1	0.37	1
thorax	III	FBgn0040827	CG13315	50300	28.36	11493	0.1	0.0024	0.3	0.016	-0.52	-0.4	FALSE	FALSE	FALSE	FALSE	0.045	0.28	0.21	0.45	0.37	0.9	1	0.98	1
thorax	III	FBgn0023213	eIF4G1	43839	30.7	5892.93	0.032	0.013	0.16	0.06	-0.22	-0.37	FALSE	FALSE	FALSE	FALSE	0.69	0.88	0.076	0.24	-0.17	0.019	0.7	0.33	1
thorax	III	FBgn0035529	Fdx2	38530	30.65	952.02	0.17	0.0011	0.39	0.009	-0.44	-0.34	FALSE	FALSE	FALSE	FALSE	0.32	0.65	0.97	0.99	-0.012	0.58	0.98	0.63	1
thorax	III	FBgn0031824	CG9547	33911	26.78	491.11	0.2	0.00077	0.43	0.0068	-0.15	-0.49	FALSE	FALSE	FALSE	FALSE	0.083	0.36	0.00077	0.012	-0.42	0.34	0.97	0.88	1
thorax	III	FBgn0035206	CG9186	38150	27.43	616.51	0.23	0.00058	0.46	0.0054	-0.56	-0.33	FALSE	FALSE	FALSE	FALSE	0.77	0.91	0.095	0.28	-0.74	0.4	0.97	0.25	1
thorax	III	FBgn0039300	RpS27	43039	30.34	9810.35	0.39	0.00011	0.62	0.0014	-0.13	-0.28	FALSE	FALSE	FALSE	FALSE	0.38	0.7	0.7	0.85	0.054	0.23	0.97	0.91	1
thorax	III	FBgn0004629	Cys	41767	29.96	6768.85	0.96	4.3e-09	0.98	2.4e-07	-0.011	-0.67	FALSE	FALSE	FALSE	FALSE	0.3	0.64	0.13	0.33	-0.37	0.52	0.97	0.023	1
thorax	III	FBgn0263120	Acsl	46068	30.84	19978.2	0.26	0.00047	0.5	0.0046	-0.12	-0.32	FALSE	FALSE	FALSE	FALSE	0.94	0.98	0.28	0.53	-0.11	0.019	0.7	0.27	1
thorax	III	FBgn0036136	Ufd1-like	39254	24.53	741.68	0.055	0.012	0.21	0.058	-1.1	-0.27	FALSE	FALSE	FALSE	FALSE	0.026	0.22	0.19	0.43	0.66	0.97	1	0.62	1
thorax	III	FBgn0037955	CG6950	41433	27.12	1477.62	0.25	0.00078	0.48	0.007	-0.62	-0.35	FALSE	FALSE	FALSE	FALSE	0.24	0.58	0.62	0.8	0.25	0.77	1	0.083	1
thorax	III	FBgn0034277	OstDelta	37029	29.56	1480.27	0.34	0.00033	0.58	0.0035	-0.22	-0.34	FALSE	FALSE	FALSE	FALSE	0.76	0.91	0.57	0.77	-0.12	0.22	0.96	0.36	1
thorax	III	FBgn0012036	Aldh	34256	34.46	21448.8	0.59	3.2e-05	0.77	0.00051	-0.043	-0.4	FALSE	FALSE	FALSE	FALSE	0.049	0.29	0.023	0.11	0.18	0.15	0.93	0.3	1
thorax	III	FBgn0259482	Mob3	34372	23.37	280.15	0.08	0.0095	0.26	0.048	-1.3	-0.39	FALSE	FALSE	FALSE	FALSE	0.45	0.75	0.41	0.66	-0.56	0.66	0.99	0.5	1
thorax	III	FBgn0034390	CG15093	37166	30.69	1145.65	0.22	0.0014	0.46	0.011	-0.18	-0.59	FALSE	FALSE	FALSE	FALSE	0.48	0.76	0.029	0.13	-0.32	0.15	0.93	0.91	1
thorax	III	FBgn0039674	CG1907	43483	30.55	1290.53	0.039	0.024	0.17	0.095	-0.26	-0.21	FALSE	FALSE	FALSE	FALSE	0.16	0.5	0.81	0.91	-0.027	0.26	0.97	0.65	1
thorax	III	FBgn0034138	RpS15	36851	31.54	18117.3	0.18	0.0025	0.41	0.017	-0.42	-0.18	FALSE	FALSE	FALSE	FALSE	0.26	0.59	0.84	0.92	0.058	0.63	0.99	0.56	1
thorax	III	FBgn0033028	CG11665	35499	25.83	1233.16	0.18	0.0025	0.41	0.017	-0.94	-0.33	FALSE	FALSE	FALSE	FALSE	0.68	0.87	0.4	0.65	-0.55	0.52	0.97	0.43	1
thorax	III	FBgn0259979	CG17337	35507	32.13	1297.9	0.33	0.00055	0.57	0.0052	-0.14	-0.4	FALSE	FALSE	FALSE	FALSE	0.86	0.95	0.21	0.45	-0.17	0.063	0.81	0.34	1
thorax	III	FBgn0000556	eEF1alpha1	36271	35.19	123437	0.054	0.018	0.21	0.078	-0.24	-0.25	FALSE	FALSE	FALSE	FALSE	0.031	0.23	0.23	0.48	0.14	0.58	0.98	0.53	1
thorax	III	FBgn0053126	NLaz	33324	28.44	7233.79	0.53	8e-05	0.73	0.0011	-0.1	-0.39	FALSE	FALSE	FALSE	FALSE	0.29	0.62	0.37	0.63	0.14	0.33	0.97	0.21	1
thorax	III	FBgn0051313	CG31313	318677	28.08	4603.59	0.37	0.00048	0.6	0.0047	-0.33	-0.36	FALSE	FALSE	FALSE	FALSE	0.88	0.96	0.24	0.5	-0.41	0.3	0.97	0.036	1
thorax	III	FBgn0032213	CG5390	34383	27.01	3451.88	0.5	0.00014	0.71	0.0017	-0.34	-0.4	FALSE	FALSE	FALSE	FALSE	0.25	0.59	0.33	0.59	0.47	0.75	1	0.11	1
thorax	III	FBgn0031980	RpL36A	34098	30.64	17062.1	0.084	0.016	0.26	0.072	-0.48	-0.2	FALSE	FALSE	FALSE	FALSE	0.19	0.53	0.96	0.99	0.012	0.66	0.99	0.28	1
thorax	III	FBgn0031313	CG5080	33299	30.74	2973.75	0.096	0.014	0.29	0.065	-0.39	-0.28	FALSE	FALSE	FALSE	FALSE	0.99	1	0.076	0.24	-0.39	0.14	0.93	0.39	1
thorax	III	FBgn0024293	Spn43Ab	45040	29.93	5512.87	0.12	0.01	0.33	0.051	-0.51	-0.26	FALSE	FALSE	FALSE	FALSE	0.64	0.86	0.32	0.58	-0.3	0.38	0.97	0.98	1
thorax	III	FBgn0086372	lap	40863	27.59	1476.44	0.088	0.02	0.27	0.084	-0.37	-0.19	FALSE	FALSE	FALSE	FALSE	0.54	0.8	0.012	0.075	-0.54	0.28	0.97	0.95	1
thorax	III	FBgn0030332	CG9360	32128	31.96	3712.88	0.44	0.00058	0.66	0.0054	-0.096	-0.37	FALSE	FALSE	FALSE	FALSE	0.99	1	0.43	0.67	-0.093	0.031	0.76	0.36	1
thorax	III	FBgn0261575	tobi	43072	25.53	3499.49	0.54	0.00024	0.74	0.0027	-0.45	-0.97	FALSE	FALSE	FALSE	FALSE	0.76	0.91	0.28	0.53	-0.76	0.49	0.97	0.18	1
thorax	III	FBgn0003274	RpLP2	36855	32.7	22148.2	0.58	0.00017	0.76	0.0021	-0.069	-0.4	FALSE	FALSE	FALSE	FALSE	0.11	0.41	0.076	0.24	0.22	0.37	0.97	0.47	1
thorax	III	FBgn0036622	CG4753	39819	24.28	635.34	0.19	0.0068	0.42	0.037	-0.71	-0.49	FALSE	FALSE	FALSE	FALSE	0.42	0.73	0.81	0.91	-0.12	0.64	0.99	0.039	1
thorax	III	FBgn0031417	CG3597	33420	25.71	2117.59	0.36	0.0015	0.59	0.011	-0.54	-0.58	FALSE	FALSE	FALSE	FALSE	0.76	0.91	0.17	0.39	-0.79	0.45	0.97	0.77	1
thorax	III	FBgn0025741	PlexA	43832	25.84	3589.32	0.71	5.4e-05	0.85	0.0008	-0.14	-0.41	FALSE	FALSE	FALSE	FALSE	0.49	0.77	0.53	0.74	0.22	0.51	0.97	0.76	1
thorax	III	FBgn0031590	CG3702	33628	24.38	1158.7	0.14	0.014	0.35	0.064	-0.94	-0.22	FALSE	FALSE	FALSE	FALSE	0.3	0.64	0.92	0.96	-0.055	0.74	1	0.25	1
thorax	III	FBgn0038834	RpS30	42470	30.66	15911	0.39	0.0014	0.62	0.011	-0.21	-0.25	FALSE	FALSE	FALSE	FALSE	0.24	0.58	0.015	0.089	-0.59	0.56	0.97	0.96	1
thorax	III	FBgn0026150	ApepP	35029	28.01	408.36	0.16	0.012	0.38	0.058	-0.34	-0.48	FALSE	FALSE	FALSE	FALSE	0.48	0.76	0.018	0.096	-0.57	0.37	0.97	0.11	1
thorax	III	FBgn0003137	Ppn	43872	30.17	24301.1	0.45	0.00097	0.67	0.0082	-0.18	-0.37	FALSE	FALSE	FALSE	FALSE	0.37	0.69	0.61	0.8	0.11	0.43	0.97	0.16	1
thorax	III	FBgn0036213	RpL10Ab	39338	31.11	28286.7	0.54	0.00042	0.74	0.0042	-0.09	-0.36	FALSE	FALSE	FALSE	FALSE	0.19	0.53	0.2	0.43	0.19	0.38	0.97	0.95	1
thorax	III	FBgn0032472	CG9928	34704	29.72	2702.43	0.56	0.00039	0.75	0.004	-0.091	-0.46	FALSE	FALSE	FALSE	FALSE	0.023	0.2	0.00052	0.0093	-0.63	0.81	1	0.54	1
thorax	III	FBgn0019936	RpS20	42464	32.55	13455.9	0.66	0.0002	0.82	0.0023	-0.076	-0.32	FALSE	FALSE	FALSE	FALSE	0.13	0.45	0.086	0.26	0.29	0.54	0.97	0.92	1
thorax	III	FBgn0025678	CaBP1	34976	29.74	1227.27	0.34	0.0034	0.58	0.022	-0.17	-0.37	FALSE	FALSE	FALSE	FALSE	0.054	0.3	0.063	0.22	0.33	0.75	1	0.23	1
thorax	III	FBgn0030929	CG15043	32835	24.5	895.45	0.13	0.023	0.35	0.092	-1.2	-0.53	FALSE	FALSE	FALSE	FALSE	0.69	0.88	0.038	0.16	-1.6	0.53	0.97	0.18	1
thorax	III	FBgn0041713	yellow-c	34879	27.23	2802.7	0.61	0.00036	0.78	0.0037	-0.32	-0.52	FALSE	FALSE	FALSE	FALSE	0.27	0.6	0.04	0.17	-1.3	0.77	1	0.29	1
thorax	III	FBgn0015299	Ssb-c31a	34120	26.15	235.85	0.23	0.0097	0.47	0.049	-0.57	-0.35	FALSE	FALSE	FALSE	FALSE	0.39	0.7	0.98	0.99	-0.0091	0.63	0.99	0.79	1
thorax	III	FBgn0031320	CG5126	33306	25.98	275.68	0.7	0.00019	0.84	0.0022	-0.26	-0.43	FALSE	FALSE	FALSE	FALSE	0.0087	0.14	0.0012	0.016	2.4	0.99	1	0.077	1
thorax	III	FBgn0024326	Mkk4	41020	26.18	675.14	0.2	0.015	0.42	0.069	-0.36	-0.23	FALSE	FALSE	FALSE	FALSE	0.027	0.22	0.051	0.19	0.53	0.92	1	0.99	1
thorax	III	FBgn0013997	Nrx-IV	39387	26.53	1691.28	0.32	0.0054	0.56	0.031	-0.66	-0.24	FALSE	FALSE	FALSE	FALSE	0.27	0.6	0.56	0.76	0.36	0.77	1	0.14	1
thorax	III	FBgn0004055	uzip	38002	27.76	965.13	0.22	0.013	0.45	0.06	-0.52	-0.23	FALSE	FALSE	FALSE	FALSE	0.32	0.65	0.88	0.94	0.059	0.66	0.99	0.13	1
thorax	III	FBgn0015521	RpS21	33487	30.19	5342.26	0.53	0.0011	0.73	0.0089	-0.11	-0.28	FALSE	FALSE	FALSE	FALSE	0.075	0.35	0.052	0.19	0.35	0.69	0.99	0.77	1
thorax	III	FBgn0030734	CG9911	32588	28.49	1192.81	0.19	0.019	0.42	0.081	-0.2	-0.22	FALSE	FALSE	FALSE	FALSE	0.5	0.77	0.67	0.83	-0.059	0.16	0.93	0.19	1
thorax	III	FBgn0030151	CG1354	31914	29.35	1206.49	0.22	0.016	0.45	0.071	-0.29	-0.27	FALSE	FALSE	FALSE	FALSE	0.045	0.28	0.086	0.26	0.39	0.85	1	0.16	1
thorax	III	FBgn0004066	Prosalpha4	32584	29.79	1368.87	0.34	0.0065	0.58	0.036	-0.19	-0.31	FALSE	FALSE	FALSE	FALSE	0.5	0.77	0.98	0.99	-0.0058	0.29	0.97	0.39	1
thorax	III	FBgn0015286	Rala	31332	24.72	685.64	0.48	0.0023	0.69	0.016	-0.57	-0.38	FALSE	FALSE	FALSE	FALSE	0.78	0.91	0.26	0.51	-0.88	0.49	0.97	0.61	1
thorax	III	FBgn0038681	Cyp12a4	42294	28.29	2327.34	0.27	0.012	0.51	0.058	-0.29	-0.34	FALSE	FALSE	FALSE	FALSE	0.24	0.58	0.57	0.77	0.14	0.59	0.98	0.13	1
thorax	III	FBgn0032704	Jwa	35128	26.55	1643.47	0.42	0.0038	0.65	0.024	-0.34	-0.33	FALSE	FALSE	FALSE	FALSE	0.38	0.69	0.043	0.17	-0.86	0.62	0.99	0.064	1
thorax	III	FBgn0035452	CG10359	38434	23.87	127.46	0.54	0.0023	0.73	0.016	-0.22	-0.55	FALSE	FALSE	FALSE	FALSE	0.99	1	0.51	0.73	-0.22	0.24	0.97	0.66	1
thorax	III	FBgn0002579	RpL36	31009	32.23	17222.2	0.69	0.00068	0.84	0.0063	-0.053	-0.26	FALSE	FALSE	FALSE	FALSE	0.23	0.57	0.18	0.41	0.17	0.27	0.97	0.5	1
thorax	III	FBgn0002590	RpS5a	32700	30.33	19047.8	0.82	0.00014	0.91	0.0018	-0.037	-0.25	FALSE	FALSE	FALSE	FALSE	0.01	0.15	0.001	0.015	0.6	0.9	1	0.5	1
thorax	III	FBgn0036680	Cpr73D	39897	30.55	475.02	0.85	0.00011	0.92	0.0014	-0.029	-0.42	FALSE	FALSE	FALSE	FALSE	0.8	0.92	0.86	0.93	0.024	0.086	0.85	0.63	1
thorax	III	FBgn0030160	CG9691	31923	29.78	5166.64	0.43	0.0076	0.65	0.04	-0.18	-0.27	FALSE	FALSE	FALSE	FALSE	0.26	0.59	0.4	0.65	0.19	0.54	0.97	0.89	1
thorax	III	FBgn0041180	Tep4	35248	30.22	11123.2	0.34	0.014	0.58	0.066	-0.16	-0.26	FALSE	FALSE	FALSE	FALSE	0.44	0.74	0.044	0.17	-0.34	0.24	0.97	0.65	1
thorax	III	FBgn0035355	CG16985	38323	31.19	244.79	0.71	0.00086	0.85	0.0075	-0.056	-0.52	FALSE	FALSE	FALSE	FALSE	0.062	0.32	0.0042	0.037	-0.47	0.63	0.99	0.12	1
thorax	III	FBgn0017545	RpS3A	43768	32.82	31089.9	0.89	7.4e-05	0.95	0.001	-0.014	-0.38	FALSE	FALSE	FALSE	FALSE	0.58	0.83	0.34	0.6	-0.093	0.038	0.76	0.41	1
thorax	III	FBgn0025456	CREG	42092	26.41	800.31	0.95	1.4e-05	0.98	0.00025	-0.034	-0.44	FALSE	FALSE	FALSE	FALSE	0.49	0.77	0.35	0.6	0.49	0.59	0.98	0.0066	0.71
thorax	III	FBgn0016726	RpL29	37430	29.9	9463.31	0.77	0.00056	0.89	0.0053	-0.1	-0.3	FALSE	FALSE	FALSE	FALSE	0.079	0.36	0.028	0.13	0.8	0.87	1	0.86	1
thorax	III	FBgn0033624	CG12384	36224	30.22	1000.26	0.81	0.00036	0.91	0.0037	-0.046	-0.3	FALSE	FALSE	FALSE	FALSE	0.48	0.76	0.43	0.67	0.14	0.28	0.97	0.8	1
thorax	III	FBgn0034328	IM23	37099	26.58	256.56	0.57	0.0041	0.76	0.025	-0.32	-0.67	FALSE	FALSE	FALSE	FALSE	0.0051	0.11	6.2e-05	0.0023	-2.8	0.99	1	0.13	1
thorax	III	FBgn0033663	ERp60	36270	32.45	4970.96	0.34	0.025	0.58	0.097	-0.099	-0.15	FALSE	FALSE	FALSE	FALSE	0.36	0.69	0.75	0.88	0.031	0.074	0.84	0.32	1
thorax	III	FBgn0039965	CG13865	3355158	26.97	629.6	0.42	0.015	0.65	0.067	-0.25	-0.23	FALSE	FALSE	FALSE	FALSE	0.49	0.77	0.88	0.94	0.045	0.45	0.97	0.64	1
thorax	III	FBgn0035763	CG8602	38808	25.25	2599.63	0.76	0.0012	0.88	0.0098	-0.31	-0.26	FALSE	FALSE	FALSE	FALSE	0.23	0.57	0.16	0.38	1.4	0.83	1	0.45	1
thorax	III	FBgn0034471	Obp56e	37267	27.4	98.71	0.36	0.024	0.59	0.095	-0.28	-0.58	FALSE	FALSE	FALSE	FALSE	0.2	0.54	0.35	0.61	0.27	0.69	0.99	0.64	1
thorax	III	FBgn0086710	RpL30	44059	29.67	12176.2	0.71	0.002	0.85	0.014	-0.1	-0.29	FALSE	FALSE	FALSE	FALSE	0.033	0.24	0.0085	0.06	0.75	0.91	1	0.54	1
thorax	III	FBgn0058045	CG40045	3355079	26.92	1357.52	0.45	0.014	0.67	0.066	-0.76	-0.22	FALSE	FALSE	FALSE	FALSE	0.18	0.52	0.23	0.48	1.2	0.87	1	0.94	1
thorax	III	FBgn0029849	Efr	31553	25.34	849.03	0.61	0.0058	0.78	0.033	-0.43	-0.23	FALSE	FALSE	FALSE	FALSE	0.4	0.71	0.49	0.72	0.54	0.71	1	0.52	1
thorax	III	FBgn0037652	CG11980	41078	28.28	461.31	0.53	0.01	0.73	0.051	-0.17	-0.3	FALSE	FALSE	FALSE	FALSE	0.7	0.89	0.9	0.95	-0.03	0.29	0.97	0.024	1
thorax	III	FBgn0034200	Gbp2	36937	29.76	5120.66	0.65	0.0045	0.81	0.027	-0.12	-0.28	FALSE	FALSE	FALSE	FALSE	0.22	0.56	0.19	0.42	0.32	0.61	0.98	0.07	1
thorax	III	FBgn0035827	Srp9	38883	26.21	269.48	0.45	0.021	0.67	0.087	-0.45	-0.31	FALSE	FALSE	FALSE	FALSE	0.87	0.95	0.31	0.56	-0.58	0.4	0.97	0.69	1
thorax	III	FBgn0032986	CG3262	35452	27.14	1126.71	0.79	0.0019	0.9	0.014	-0.08	-0.28	FALSE	FALSE	FALSE	FALSE	0.98	1	0.8	0.91	-0.072	0.21	0.96	0.59	1
thorax	III	FBgn0016697	Prosalpha5	36951	28.19	1398.66	0.95	0.0001	0.98	0.0014	-0.019	-0.31	FALSE	FALSE	FALSE	FALSE	0.76	0.91	0.61	0.8	-0.14	0.3	0.97	0.35	1
thorax	III	FBgn0037936	CG6908	41410	25.91	845.1	0.74	0.0033	0.87	0.021	-0.13	-0.45	FALSE	FALSE	FALSE	FALSE	0.94	0.98	0.65	0.82	-0.17	0.3	0.97	0.46	1
thorax	III	FBgn0263740	eIF2gamma	41843	28.99	1818.48	0.51	0.024	0.71	0.096	-0.098	-0.24	FALSE	FALSE	FALSE	FALSE	0.49	0.77	0.76	0.88	0.043	0.17	0.93	0.64	1
thorax	III	FBgn0035402	Usp5	38375	29.08	766.82	0.6	0.017	0.78	0.075	-0.12	-0.23	FALSE	FALSE	FALSE	FALSE	0.6	0.84	0.84	0.92	0.042	0.27	0.97	0.22	1
thorax	III	FBgn0040285	Scamp	32470	25.27	733.12	0.59	0.023	0.77	0.093	-0.28	-0.24	FALSE	FALSE	FALSE	FALSE	0.057	0.31	0.029	0.13	1.1	0.93	1	0.89	1
thorax	III	FBgn0034753	CG2852	37591	32.93	4078.23	0.95	0.00041	0.97	0.0041	-0.0085	-0.36	FALSE	FALSE	FALSE	FALSE	0.18	0.53	0.066	0.22	0.23	0.28	0.97	0.66	1
thorax	III	FBgn0005593	RpL7	34352	31.52	23103.4	0.84	0.0032	0.92	0.021	-0.032	-0.24	FALSE	FALSE	FALSE	FALSE	0.022	0.2	0.0031	0.029	0.5	0.81	1	0.8	1
thorax	III	FBgn0040813	Nplp2	50286	35.81	35476.6	0.76	0.009	0.88	0.046	-0.04	-0.41	FALSE	FALSE	FALSE	FALSE	0.03	0.23	0.0061	0.049	0.38	0.67	0.99	0.98	1
thorax	III	FBgn0015808	ScpX	44183	29.17	3047.97	0.82	0.006	0.91	0.034	-0.043	-0.26	FALSE	FALSE	FALSE	FALSE	0.62	0.84	0.63	0.81	0.085	0.2	0.96	0.83	1
thorax	III	FBgn0030305	Uba5	32094	28.13	522.87	0.89	0.0024	0.95	0.017	-0.055	-0.4	FALSE	FALSE	FALSE	FALSE	0.38	0.69	0.16	0.38	-0.56	0.61	0.98	0.73	1
thorax	III	FBgn0016701	Rab4	36992	24.91	1014.39	0.92	0.0019	0.96	0.014	-0.056	-0.29	FALSE	FALSE	FALSE	FALSE	0.65	0.87	0.45	0.68	-0.38	0.49	0.97	0.44	1
thorax	III	FBgn0032725	Nedd8	35151	30.09	397.81	0.94	0.0026	0.97	0.017	-0.014	-0.33	FALSE	FALSE	FALSE	FALSE	0.59	0.83	0.48	0.71	0.12	0.21	0.96	0.36	1
thorax	III	FBgn0053129	CG33129	34514	27.88	1265.9	0.8	0.022	0.9	0.089	-0.081	-0.3	FALSE	FALSE	FALSE	FALSE	0.93	0.98	0.69	0.85	-0.12	0.24	0.97	0.91	1
thorax	III	FBgn0014002	Pdi	39651	33.23	13093	0.82	0.022	0.91	0.089	-0.023	-0.14	FALSE	FALSE	FALSE	FALSE	0.69	0.88	0.41	0.66	-0.079	0.025	0.76	0.3	1
thorax	III	FBgn0030306	Spase25	32095	28.8	835.93	0.93	0.023	0.97	0.092	-0.044	-0.27	FALSE	FALSE	FALSE	FALSE	0.86	0.95	0.73	0.87	-0.16	0.37	0.97	0.65	1
thorax	III	FBgn0004419	me31B	34364	24.65	1982.52	0.99	0.024	1	0.094	-0.0053	-0.45	FALSE	FALSE	FALSE	FALSE	0.89	0.96	0.83	0.92	-0.12	0.39	0.97	0.51	1
thorax	IV	FBgn0262508	CG43078	38981	32.99	12551.3	0.0053	1.3e-17	0.057	4e-15	-0.26	1.2	TRUE	FALSE	TRUE	FALSE	0.53	0.8	0.025	0.12	-0.19	0.014	0.7	0.25	1
thorax	IV	FBgn0264489	CG43897	39153	31.3	15164.2	9.8e-13	7.9e-06	2.2e-09	0.00016	-2.5	0.8	TRUE	FALSE	TRUE	FALSE	0.68	0.88	6.2e-13	1.4e-09	-2.4	0.081	0.84	0.18	1
thorax	IV	FBgn0035600	Cyt-c1	38612	34.38	14745.3	0.00061	7.1e-14	0.015	1.2e-11	-0.37	0.75	TRUE	FALSE	FALSE	FALSE	0.13	0.44	3.4e-06	0.00024	-0.56	0.12	0.91	0.016	1
thorax	IV	FBgn0001098	Gdh	42832	35.97	2306.59	0.012	1.1e-16	0.086	3e-14	-0.22	0.65	TRUE	FALSE	TRUE	FALSE	0.73	0.9	0.0027	0.027	-0.26	0.0059	0.7	0.87	1
thorax	IV	FBgn0003149	Prm	39002	36.88	8806.73	2e-05	1.6e-10	0.0018	1.3e-08	-0.45	0.76	TRUE	FALSE	FALSE	FALSE	0.035	0.25	0.01	0.069	-0.21	0.17	0.94	0.53	1
thorax	IV	FBgn0000045	Act79B	40444	35.97	8533.63	8.6e-06	1.2e-08	0.0011	6e-07	-0.69	0.77	TRUE	FALSE	FALSE	FALSE	0.046	0.28	0.0025	0.025	-0.37	0.46	0.97	0.76	1
thorax	IV	FBgn0038400	CG5903	41959	32.15	3699.15	0.0076	1.3e-13	0.065	2e-11	-0.42	0.58	TRUE	FALSE	FALSE	FALSE	0.27	0.6	0.00015	0.0041	-0.64	0.26	0.97	0.0064	0.71
thorax	IV	FBgn0029868	ND-B16.6	31578	33.35	2550.56	0.00016	7.8e-10	0.0074	5.2e-08	-0.57	0.43	TRUE	FALSE	TRUE	FALSE	0.76	0.91	3.5e-05	0.0015	-0.62	0.047	0.76	0.066	1
thorax	IV	FBgn0036044	Zasp67	39148	34.23	357.69	5.7e-05	1.3e-06	0.0039	3.2e-05	-0.45	0.65	TRUE	FALSE	FALSE	FALSE	0.0078	0.13	0.22	0.46	-0.1	0.53	0.97	0.47	1
thorax	IV	FBgn0004169	up	32314	38.49	10810.3	0.0011	2.8e-08	0.022	1.2e-06	-0.29	0.8	TRUE	FALSE	FALSE	FALSE	0.00053	0.05	0.056	0.2	0.14	0.82	1	0.18	1
thorax	IV	FBgn0050359	Mal-A5	35828	28.13	5188.67	0.1	3.6e-13	0.3	5e-11	-0.29	0.77	TRUE	FALSE	FALSE	FALSE	0.57	0.82	0.34	0.59	-0.16	0.19	0.95	0.009	0.81
thorax	IV	FBgn0261565	Lmpt	39889	31.91	18143	0.00053	1.1e-07	0.014	4.1e-06	-0.41	0.74	TRUE	FALSE	FALSE	FALSE	0.049	0.29	0.17	0.39	-0.13	0.33	0.97	0.74	1
thorax	IV	FBgn0036839	SmydA-2	40075	27.49	717.84	2.7e-08	0.0022	1.2e-05	0.015	-3.8	0.41	TRUE	FALSE	FALSE	FALSE	0.00034	0.045	0.0015	0.019	-1.4	1	1	0.72	1
thorax	IV	FBgn0034420	CG10737	37202	31.87	10355.7	0.0024	2.7e-08	0.036	1.2e-06	-0.38	0.59	TRUE	FALSE	FALSE	FALSE	0.22	0.56	0.067	0.22	-0.2	0.15	0.93	0.3	1
thorax	IV	FBgn0266064	GlyS	41823	31.14	6659.93	0.022	1e-09	0.13	6.8e-08	-0.32	0.56	TRUE	FALSE	FALSE	FALSE	0.5	0.77	0.0018	0.022	-0.44	0.11	0.9	0.87	1
thorax	IV	FBgn0027601	pdgy	32426	29.81	5744.67	0.18	8.5e-13	0.41	1.1e-10	-0.15	0.59	TRUE	FALSE	FALSE	FALSE	0.0066	0.12	0.0076	0.056	0.31	0.79	1	0.045	1
thorax	IV	FBgn0261439	SdhA	37228	36.51	30550.6	0.0059	3.2e-08	0.06	1.4e-06	-0.26	0.5	TRUE	FALSE	TRUE	FALSE	0.13	0.45	0.31	0.57	-0.081	0.09	0.86	0.29	1
thorax	IV	FBgn0034075	Asph	36778	30.47	2443.26	0.0058	4.9e-08	0.06	2e-06	-0.82	0.78	TRUE	FALSE	FALSE	FALSE	0.02	0.19	0.7	0.85	0.097	0.94	1	0.5	1
thorax	IV	FBgn0019960	Mitofilin	42587	35.41	9373.21	0.041	1e-09	0.18	6.6e-08	-0.17	0.57	TRUE	FALSE	FALSE	FALSE	0.74	0.9	0.011	0.074	-0.21	0.0052	0.7	0.22	1
thorax	IV	FBgn0031869	CG18304	33969	30.29	1408.76	0.013	4.5e-08	0.09	1.8e-06	-0.35	0.74	TRUE	FALSE	FALSE	FALSE	0.095	0.39	0.71	0.86	-0.044	0.41	0.97	0.94	1
thorax	IV	FBgn0265991	Zasp52	36740	37.83	16034.3	0.052	2e-09	0.2	1.2e-07	-0.15	0.78	TRUE	FALSE	FALSE	FALSE	0.61	0.84	0.16	0.38	-0.097	0.0041	0.7	0.22	1
thorax	IV	FBgn0035793	CG7546	38844	26.18	1343.89	0.17	3.7e-11	0.4	3.5e-09	-0.75	0.51	TRUE	FALSE	FALSE	FALSE	0.13	0.45	0.43	0.67	0.4	0.86	1	0.11	1
thorax	IV	FBgn0035410	CG14964	38384	30.88	2307.98	0.015	7.6e-08	0.1	2.9e-06	-0.28	0.74	TRUE	FALSE	FALSE	FALSE	0.1	0.4	0.75	0.88	-0.031	0.26	0.97	0.89	1
thorax	IV	FBgn0031692	TpnC25D	33752	30.64	429.4	3.7e-05	0.00034	0.0028	0.0036	-0.62	0.45	TRUE	FALSE	FALSE	FALSE	0.32	0.65	0.00041	0.0081	-0.46	0.13	0.92	0.39	1
thorax	IV	FBgn0259209	Mlp60A	37853	32.72	11178.3	0.014	2.4e-07	0.095	7.7e-06	-0.91	0.54	TRUE	FALSE	FALSE	FALSE	0.038	0.25	0.71	0.86	0.12	0.92	1	0.13	1
thorax	IV	FBgn0262559	Mdh2	42185	37.61	9020.95	0.21	5.7e-11	0.45	5e-09	-0.12	0.49	TRUE	FALSE	FALSE	FALSE	0.39	0.71	0.93	0.96	-0.0081	0.043	0.76	0.23	1
thorax	IV	FBgn0050035	Tret1-1	36248	31.76	10419.5	0.0097	9.9e-07	0.078	2.5e-05	-0.43	0.37	TRUE	FALSE	FALSE	FALSE	0.34	0.67	0.12	0.32	-0.23	0.25	0.97	0.45	1
thorax	IV	FBgn0017566	ND-75	31762	37.12	17458.5	0.28	4.7e-11	0.51	4.3e-09	-0.094	0.58	TRUE	FALSE	FALSE	FALSE	0.18	0.53	0.42	0.66	0.065	0.065	0.82	0.014	1
thorax	IV	FBgn0052311	zormin	2769001	33.18	6845.46	0.025	1.8e-07	0.13	6e-06	-0.2	0.65	TRUE	FALSE	FALSE	FALSE	0.24	0.58	0.42	0.66	-0.062	0.038	0.76	0.97	1
thorax	IV	FBgn0027291	l(1)G0156	32940	37.38	7746.02	0.0034	8.5e-06	0.043	0.00017	-0.29	0.59	TRUE	FALSE	TRUE	FALSE	0.27	0.6	0.067	0.22	-0.16	0.047	0.77	0.32	1
thorax	IV	FBgn0034356	CG10924	37130	30.27	2768.02	0.00045	0.00014	0.013	0.0018	-0.66	0.48	TRUE	FALSE	TRUE	TRUE	0.86	0.95	0.00015	0.0041	-0.7	0.083	0.84	0.0002	0.067
thorax	IV	FBgn0036364	CG14109	39512	31.55	2049.01	0.28	1.1e-10	0.52	8.8e-09	-0.31	0.62	TRUE	FALSE	FALSE	FALSE	0.4	0.72	0.94	0.97	0.021	0.49	0.97	0.23	1
thorax	IV	FBgn0263006	SERCA	49297	38.25	31621	0.077	2e-08	0.25	9.1e-07	-0.15	0.64	TRUE	FALSE	FALSE	FALSE	0.09	0.38	0.54	0.75	0.047	0.11	0.89	0.94	1
thorax	IV	FBgn0035917	Zasp66	38988	36.77	18111.5	0.0012	0.0001	0.023	0.0013	-0.32	0.56	TRUE	FALSE	FALSE	FALSE	0.022	0.2	0.65	0.82	-0.036	0.33	0.97	0.24	1
thorax	IV	FBgn0010808	Chchd3	43672	34.06	3198.17	0.0017	8.8e-05	0.029	0.0012	-0.5	0.37	TRUE	FALSE	FALSE	FALSE	0.016	0.17	0.94	0.97	-0.0093	0.79	1	0.22	1
thorax	IV	FBgn0027585	CG8740	35866	28.81	3297.34	0.035	7e-07	0.16	1.9e-05	-0.36	0.66	TRUE	FALSE	FALSE	FALSE	0.15	0.48	0.8	0.91	-0.039	0.46	0.97	0.31	1
thorax	IV	FBgn0020235	ATPsyngamma	43507	36.81	8559.51	0.071	1.3e-07	0.24	4.6e-06	-0.16	0.41	TRUE	FALSE	FALSE	FALSE	0.026	0.22	0.15	0.36	0.12	0.31	0.97	0.085	1
thorax	IV	FBgn0263980	CG43729	5740318	28.65	3573.57	0.16	1.2e-08	0.38	6e-07	-0.21	0.78	TRUE	FALSE	FALSE	FALSE	0.29	0.62	0.97	0.99	0.0045	0.26	0.97	0.66	1
thorax	IV	FBgn0042201	Nplp3	59235	28.6	187.23	0.6	4.7e-12	0.78	5.5e-10	-0.14	1.3	TRUE	FALSE	FALSE	TRUE	0.24	0.58	0.032	0.14	-0.57	0.6	0.98	1.1e-05	0.0083
thorax	IV	FBgn0259246	brp	35977	30.43	554.7	0.12	3.6e-08	0.32	1.5e-06	-0.25	0.85	TRUE	FALSE	FALSE	FALSE	0.13	0.45	0.56	0.76	0.084	0.48	0.97	0.17	1
thorax	IV	FBgn0019624	COX5A	41432	36.87	18915	0.48	4.4e-11	0.69	4.1e-09	-0.09	0.49	TRUE	FALSE	FALSE	FALSE	0.34	0.68	0.53	0.74	0.076	0.16	0.93	0.0035	0.53
thorax	IV	FBgn0030087	CG7766	31839	29.18	10318.6	0.2	1.1e-08	0.43	5.6e-07	-0.27	0.54	TRUE	FALSE	FALSE	FALSE	0.86	0.95	0.11	0.3	-0.33	0.16	0.93	0.54	1
thorax	IV	FBgn0011286	RyR	49090	32.84	9379.46	0.067	4.1e-07	0.23	1.2e-05	-0.15	0.77	TRUE	FALSE	FALSE	FALSE	0.18	0.53	0.00077	0.012	-0.3	0.045	0.76	0.86	1
thorax	IV	FBgn0010482	l(2)01289	46017	33.46	6301.82	0.00081	0.0012	0.018	0.0094	-0.37	0.48	TRUE	FALSE	FALSE	FALSE	0.025	0.22	5e-07	6e-05	-0.68	0.4	0.97	0.92	1
thorax	IV	FBgn0001991	Ca-alpha1D	34950	28.47	1183.33	0.0065	0.0001	0.062	0.0014	-0.63	0.53	TRUE	FALSE	FALSE	FALSE	0.11	0.41	0.42	0.66	-0.16	0.68	0.99	0.54	1
thorax	IV	FBgn0004028	wupA	32794	37.54	10004.7	0.069	1.7e-06	0.24	4.1e-05	-0.21	0.53	TRUE	FALSE	FALSE	FALSE	0.0083	0.14	0.034	0.15	0.23	0.75	1	0.71	1
thorax	IV	FBgn0001989	ND-B17	34925	35.2	3380.01	0.0054	0.00022	0.058	0.0025	-0.4	0.32	TRUE	FALSE	FALSE	FALSE	0.00074	0.053	0.018	0.096	0.31	0.98	1	0.031	1
thorax	IV	FBgn0053519	Unc-89	3346201	36.45	15389.5	0.14	3.2e-07	0.36	1e-05	-0.11	0.76	TRUE	FALSE	FALSE	FALSE	0.46	0.75	0.014	0.084	-0.19	0.0093	0.7	0.75	1
thorax	IV	FBgn0017429	CG5989	38984	28.49	425.64	0.26	3.3e-08	0.5	1.4e-06	-0.4	0.66	TRUE	FALSE	FALSE	FALSE	0.65	0.87	0.075	0.24	-0.62	0.4	0.97	0.44	1
thorax	IV	FBgn0036702	CG6512	39922	32.73	5542.79	0.002	0.00082	0.033	0.0072	-0.26	0.27	TRUE	FALSE	TRUE	FALSE	0.055	0.3	0.39	0.65	-0.059	0.091	0.86	0.49	1
thorax	IV	FBgn0265356	tn	37190	28.19	6928.84	0.1	1.1e-06	0.3	2.8e-05	-0.4	0.63	TRUE	FALSE	FALSE	FALSE	0.46	0.75	0.47	0.71	-0.16	0.38	0.97	0.51	1
thorax	IV	FBgn0011787	mRpL12	44326	29.66	248.19	0.00093	0.0021	0.019	0.015	-0.69	0.43	TRUE	FALSE	FALSE	FALSE	0.84	0.94	0.0011	0.015	-0.64	0.12	0.91	0.28	1
thorax	IV	FBgn0000303	ChAT	42249	25.91	126.79	0.084	2.7e-06	0.26	6.3e-05	-0.7	0.88	TRUE	FALSE	FALSE	FALSE	0.11	0.41	0.59	0.78	0.2	0.85	1	0.14	1
thorax	IV	FBgn0052029	Cpr66D	38990	26.83	731.73	0.43	4.7e-09	0.65	2.6e-07	-0.19	0.84	TRUE	FALSE	FALSE	FALSE	0.65	0.87	0.14	0.36	-0.34	0.28	0.97	0.0096	0.83
thorax	IV	FBgn0010352	Nc73EF	39899	29.3	45693.7	0.29	4.9e-08	0.52	2e-06	-0.33	0.57	TRUE	FALSE	FALSE	FALSE	0.52	0.79	0.05	0.19	-0.59	0.43	0.97	0.64	1
thorax	IV	FBgn0030718	ND-20	32565	31.9	10114.2	0.048	1.6e-05	0.19	0.00028	-0.33	0.32	TRUE	FALSE	FALSE	FALSE	0.81	0.92	0.074	0.24	-0.28	0.098	0.89	0.49	1
thorax	IV	FBgn0033027	TpnC4	35498	37.06	3352.73	0.0025	0.0014	0.037	0.011	-0.28	0.45	TRUE	FALSE	FALSE	FALSE	0.072	0.34	0.35	0.6	-0.072	0.12	0.92	0.61	1
thorax	IV	FBgn0262599	SmydA-3	34502	24.4	165.47	0.0023	0.0015	0.036	0.011	-1.1	0.56	TRUE	FALSE	FALSE	FALSE	0.34	0.68	0.029	0.13	-0.68	0.56	0.97	0.2	1
thorax	IV	FBgn0261788	Ank2	38863	32.57	2450.59	0.19	5.1e-07	0.42	1.4e-05	-0.13	0.63	TRUE	FALSE	FALSE	FALSE	0.06	0.32	0.16	0.38	0.13	0.29	0.97	0.48	1
thorax	IV	FBgn0000409	Cyt-c-p	34996	36.88	15866.6	0.029	6.7e-05	0.14	0.00094	-0.28	0.46	TRUE	FALSE	FALSE	FALSE	0.36	0.69	0.27	0.52	-0.13	0.13	0.92	0.03	1
thorax	IV	FBgn0028704	Nckx30C	45248	26.21	513.68	0.084	9e-06	0.27	0.00017	-1.1	0.71	TRUE	FALSE	FALSE	FALSE	0.066	0.33	0.37	0.62	0.5	0.93	1	0.042	1
thorax	IV	FBgn0034645	ND-B12	37466	33.66	3666.71	0.21	7.3e-07	0.44	1.9e-05	-0.19	0.41	TRUE	FALSE	FALSE	TRUE	0.54	0.8	0.033	0.15	-0.31	0.15	0.93	3.1e-08	0.00018
thorax	IV	FBgn0022160	Gpo1	47611	36.23	8936.03	0.13	3.6e-06	0.34	8e-05	-0.14	0.48	TRUE	FALSE	FALSE	FALSE	0.24	0.58	0.003	0.029	-0.28	0.056	0.8	0.14	1
thorax	IV	FBgn0002773	Mlc2	43587	38.01	24296.2	0.082	1.3e-05	0.26	0.00023	-0.18	0.66	TRUE	FALSE	FALSE	FALSE	0.11	0.41	0.00036	0.0074	-0.41	0.21	0.96	0.54	1
thorax	IV	FBgn0037329	POLDIP2	40655	25.8	1954.57	0.33	1.2e-07	0.57	4.1e-06	-0.61	0.54	TRUE	FALSE	FALSE	FALSE	0.39	0.71	0.83	0.92	0.13	0.68	0.99	0.059	1
thorax	IV	FBgn0036762	CG7430	39988	36.77	9242.79	0.097	9.5e-06	0.29	0.00018	-0.13	0.33	TRUE	FALSE	FALSE	FALSE	0.95	0.98	0.095	0.28	-0.12	0.002	0.7	0.57	1
thorax	IV	FBgn0030976	CG7378	32888	30.3	2852.31	0.029	0.00014	0.14	0.0017	-0.36	0.51	TRUE	FALSE	FALSE	FALSE	0.67	0.87	0.0056	0.046	-0.45	0.12	0.91	0.18	1
thorax	IV	FBgn0032129	jp	34274	24.92	3134.99	0.0088	0.00093	0.073	0.0079	-1.5	0.54	TRUE	FALSE	FALSE	FALSE	0.077	0.35	0.7	0.85	-0.19	0.91	1	0.5	1
thorax	IV	FBgn0032010	CG8086	34131	27.07	1536.92	0.0091	0.00094	0.075	0.008	-0.67	0.48	TRUE	FALSE	FALSE	FALSE	0.041	0.27	0.92	0.96	0.023	0.86	1	0.46	1
thorax	IV	FBgn0021967	ND-PDSW	44228	34.59	2851.99	0.028	0.00019	0.14	0.0023	-0.24	0.29	TRUE	FALSE	FALSE	FALSE	0.036	0.25	0.45	0.69	0.072	0.42	0.97	0.078	1
thorax	IV	FBgn0263593	Lpin	35790	26.93	8923.31	0.0051	0.0021	0.057	0.015	-0.5	0.4	TRUE	FALSE	FALSE	FALSE	0.7	0.88	0.00097	0.014	-0.59	0.12	0.92	0.42	1
thorax	IV	FBgn0014869	Pglym78	43447	37.12	4332.6	0.0023	0.0049	0.036	0.029	-0.32	0.25	TRUE	FALSE	FALSE	FALSE	0.0023	0.09	0.17	0.4	0.12	0.78	1	0.78	1
thorax	IV	FBgn0051374	sals	41377	30.72	1879.79	0.25	1e-06	0.49	2.7e-05	-0.14	0.73	TRUE	FALSE	FALSE	FALSE	0.086	0.37	0.18	0.41	0.15	0.38	0.97	0.76	1
thorax	IV	FBgn0261955	kdn	31579	37.71	2858.17	0.43	8.6e-08	0.65	3.2e-06	-0.084	0.51	TRUE	FALSE	FALSE	FALSE	0.38	0.69	0.044	0.17	-0.21	0.078	0.84	0.61	1
thorax	IV	FBgn0038744	CG4733	42368	26.6	2386.88	0.87	2.8e-11	0.94	2.8e-09	-0.061	0.8	TRUE	FALSE	FALSE	FALSE	0.58	0.83	0.34	0.59	-0.35	0.46	0.97	0.098	1
thorax	IV	FBgn0003721	Tm1	41852	38.56	11866.3	0.002	0.0062	0.033	0.035	-0.25	0.25	TRUE	FALSE	FALSE	FALSE	0.00047	0.048	0.026	0.13	0.16	0.75	1	0.74	1
thorax	IV	FBgn0038641	CG7708	42245	24.83	246.67	0.068	5.3e-05	0.23	0.00079	-1.1	0.68	TRUE	FALSE	FALSE	FALSE	0.42	0.73	0.4	0.65	-0.44	0.64	0.99	0.084	1
thorax	IV	FBgn0004117	Tm2	41853	38.62	3702.45	0.1	2.3e-05	0.3	0.00038	-0.22	0.57	TRUE	FALSE	FALSE	FALSE	0.039	0.26	0.17	0.4	0.17	0.62	0.99	0.86	1
thorax	IV	FBgn0031021	ND-18	32936	35.59	3827.79	0.048	0.00011	0.19	0.0015	-0.22	0.33	TRUE	FALSE	FALSE	FALSE	0.22	0.56	0.69	0.85	-0.04	0.15	0.93	0.17	1
thorax	IV	FBgn0265003	koi	35594	29.09	1000.63	0.18	6.2e-06	0.41	0.00013	-0.28	0.37	TRUE	FALSE	FALSE	FALSE	0.36	0.69	0.91	0.96	-0.021	0.39	0.97	0.92	1
thorax	IV	FBgn0038922	Idh3b	42586	35.75	6829.82	0.82	3.1e-10	0.91	2.2e-08	-0.02	0.55	TRUE	FALSE	FALSE	FALSE	0.043	0.27	0.0032	0.03	-0.27	0.23	0.97	0.031	1
thorax	IV	FBgn0000557	eEF1alpha2	43736	33.18	9109.37	0.13	1.8e-05	0.33	0.00031	-0.19	0.53	TRUE	FALSE	FALSE	FALSE	0.13	0.45	0.00092	0.014	-0.45	0.31	0.97	0.37	1
thorax	IV	FBgn0038683	CG11779	42298	32.38	698.9	0.0068	0.0026	0.063	0.018	-0.39	0.31	TRUE	FALSE	TRUE	FALSE	0.58	0.83	0.026	0.12	-0.29	0.092	0.86	0.93	1
thorax	IV	FBgn0037655	Kcmf1	41082	25.75	5478.75	0.37	5.7e-07	0.6	1.6e-05	-0.52	0.52	TRUE	FALSE	FALSE	FALSE	0.27	0.6	0.5	0.73	0.37	0.76	1	0.066	1
thorax	IV	FBgn0000024	Ace	41625	29.55	939.96	0.45	3.4e-07	0.66	1e-05	-0.21	0.58	TRUE	FALSE	FALSE	FALSE	0.17	0.52	0.23	0.48	0.32	0.69	0.99	0.39	1
thorax	IV	FBgn0016119	ATPsynCF6	42759	36.13	4552.64	0.19	1.4e-05	0.42	0.00025	-0.11	0.43	TRUE	FALSE	FALSE	FALSE	0.52	0.79	0.63	0.81	-0.039	0.017	0.7	0.1	1
thorax	IV	FBgn0033961	ND-B15	36640	34.59	1735.51	0.0075	0.0045	0.065	0.027	-0.39	0.25	TRUE	FALSE	FALSE	FALSE	0.0032	0.099	0.091	0.27	0.22	0.93	1	0.1	1
thorax	IV	FBgn0004507	GlyP	33386	35.93	19507.4	0.76	5e-09	0.88	2.7e-07	-0.022	0.72	TRUE	FALSE	FALSE	FALSE	0.00028	0.041	2.4e-06	0.00019	-0.46	0.84	1	0.066	1
thorax	IV	FBgn0051352	Unc-115a	261629	31.44	2682.5	0.51	2.2e-07	0.71	7e-06	-0.054	0.36	TRUE	FALSE	FALSE	TRUE	0.38	0.69	0.55	0.75	0.046	0.023	0.74	1.3e-05	0.0087
thorax	IV	FBgn0001308	Khc	36810	31.27	2862.43	0.03	0.00086	0.15	0.0075	-0.23	0.2	TRUE	FALSE	FALSE	FALSE	0.1	0.4	1	1	-0.00031	0.21	0.96	0.44	1
thorax	IV	FBgn0001220	Hsc70-5	36583	34.35	8515.84	0.13	4.6e-05	0.35	0.00069	-0.12	0.28	TRUE	FALSE	FALSE	FALSE	0.07	0.34	0.27	0.52	0.08	0.083	0.84	0.87	1
thorax	IV	FBgn0034354	GstE11	37128	25.02	191.95	0.095	0.00011	0.29	0.0014	-1.8	0.65	TRUE	FALSE	FALSE	FALSE	0.47	0.76	0.43	0.67	-0.76	0.68	0.99	0.039	1
thorax	IV	FBgn0032156	CG13124	34310	25.04	4041.19	0.096	0.00011	0.29	0.0014	-1.3	0.55	TRUE	FALSE	FALSE	FALSE	0.021	0.19	0.081	0.25	1.3	0.98	1	0.4	1
thorax	IV	FBgn0029502	COQ7	44007	27.37	1875.92	0.014	0.0029	0.094	0.019	-1.3	0.27	TRUE	FALSE	FALSE	FALSE	0.25	0.59	0.25	0.5	-0.54	0.75	1	0.21	1
thorax	IV	FBgn0024992	CG2658	31253	30.33	2065.63	0.0033	0.012	0.042	0.059	-0.37	0.3	TRUE	FALSE	FALSE	FALSE	0.0044	0.11	2.1e-07	3.2e-05	-0.85	0.83	1	0.46	1
thorax	IV	FBgn0032229	CG5045	34402	29.61	658.74	0.16	4.2e-05	0.38	0.00064	-0.29	0.37	TRUE	FALSE	FALSE	FALSE	0.49	0.77	0.019	0.1	-0.47	0.29	0.97	0.043	1
thorax	IV	FBgn0004888	Scsalpha	38447	37.01	8549.67	0.026	0.0017	0.14	0.013	-0.26	0.3	TRUE	FALSE	FALSE	FALSE	0.0026	0.09	0.021	0.11	0.26	0.88	1	0.4	1
thorax	IV	FBgn0002789	Mp20	36468	34.64	2529.65	0.82	3.6e-09	0.91	2.1e-07	-0.02	0.66	TRUE	FALSE	FALSE	FALSE	0.16	0.49	0.071	0.23	0.16	0.1	0.89	0.56	1
thorax	IV	FBgn0262515	VhaAC45	35944	26.68	5359.2	0.17	4.5e-05	0.4	0.00069	-0.3	0.3	TRUE	FALSE	FALSE	FALSE	0.26	0.59	0.0052	0.043	-0.65	0.51	0.97	0.51	1
thorax	IV	FBgn0019957	ND-42	42591	34.9	6037.32	0.3	9.2e-06	0.54	0.00018	-0.099	0.4	TRUE	FALSE	FALSE	FALSE	0.25	0.59	0.011	0.074	-0.25	0.078	0.84	0.096	1
thorax	IV	FBgn0000579	Eno	33351	37.43	26074.8	0.68	7.9e-08	0.83	2.9e-06	-0.035	0.48	TRUE	FALSE	FALSE	FALSE	0.48	0.77	0.56	0.76	0.047	0.018	0.7	0.00086	0.23
thorax	IV	FBgn0038842	hdly	42478	28.64	1463.86	0.006	0.012	0.06	0.058	-0.67	0.31	TRUE	FALSE	FALSE	FALSE	0.12	0.44	0.34	0.6	-0.2	0.67	0.99	0.43	1
thorax	IV	FBgn0035032	ATPsynF	37931	35.74	6504.3	0.11	0.0002	0.31	0.0023	-0.19	0.31	TRUE	FALSE	FALSE	FALSE	0.29	0.62	0.85	0.92	-0.021	0.13	0.92	0.12	1
thorax	IV	FBgn0011211	blw	37617	39.53	27682	0.55	5.6e-07	0.74	1.5e-05	-0.049	0.41	TRUE	FALSE	FALSE	FALSE	0.083	0.36	0.058	0.2	0.15	0.11	0.91	0.39	1
thorax	IV	FBgn0086784	stmA	35865	24.1	1663.53	0.0081	0.0098	0.069	0.049	-1.6	0.2	TRUE	FALSE	FALSE	FALSE	0.62	0.84	0.026	0.13	-1.2	0.52	0.97	0.64	1
thorax	IV	FBgn0016698	Ptpa	33555	27.52	414.89	0.0044	0.019	0.051	0.082	-0.69	0.27	TRUE	FALSE	FALSE	FALSE	0.011	0.15	0.52	0.74	0.13	0.94	1	0.2	1
thorax	IV	FBgn0002174	l(2)tid	48844	28.92	986.81	0.33	1.2e-05	0.57	0.00022	-0.14	0.41	TRUE	FALSE	FALSE	FALSE	0.5	0.77	0.054	0.2	-0.28	0.16	0.93	0.044	1
thorax	IV	FBgn0085446	CG34417	31591	27.54	4865.99	0.045	0.0018	0.19	0.013	-0.75	0.44	TRUE	FALSE	FALSE	FALSE	0.0051	0.11	0.029	0.13	0.77	0.99	1	0.4	1
thorax	IV	FBgn0034792	YME1L	37636	29.47	1550.95	0.013	0.0084	0.093	0.044	-0.49	0.24	TRUE	FALSE	FALSE	FALSE	0.33	0.66	0.16	0.38	-0.24	0.35	0.97	0.6	1
thorax	IV	FBgn0035060	Eps-15	37961	29.9	1416.5	0.0073	0.016	0.064	0.07	-0.46	0.19	TRUE	FALSE	FALSE	FALSE	0.16	0.5	0.28	0.53	-0.16	0.43	0.97	0.69	1
thorax	IV	FBgn0030883	CG7772	32776	25.16	453.12	0.0041	0.025	0.049	0.098	-1.9	0.27	TRUE	FALSE	FALSE	FALSE	0.33	0.66	0.00012	0.0035	-2.7	0.71	1	0.58	1
thorax	IV	FBgn0030584	CG14407	32410	31.17	1182.19	0.54	1.6e-06	0.73	3.8e-05	-0.097	0.32	TRUE	FALSE	FALSE	TRUE	0.95	0.98	0.45	0.69	-0.11	0.071	0.83	7.3e-06	0.0068
thorax	IV	FBgn0030872	Ucp4A	32764	27.69	2302.79	0.083	0.00084	0.26	0.0073	-0.78	0.35	TRUE	FALSE	FALSE	FALSE	0.41	0.73	0.48	0.71	-0.29	0.6	0.98	0.16	1
thorax	IV	FBgn0261797	Dhc64C	38580	27.83	11367	0.018	0.0078	0.11	0.041	-0.39	0.28	TRUE	FALSE	FALSE	FALSE	0.37	0.69	0.00075	0.012	-0.58	0.24	0.97	0.46	1
thorax	IV	FBgn0034081	CG10731	3772305	26.73	330.49	0.12	0.00047	0.32	0.0046	-0.74	0.44	TRUE	FALSE	FALSE	FALSE	0.12	0.42	0.5	0.73	0.29	0.86	1	0.16	1
thorax	IV	FBgn0052528	parvin	32990	27.88	1263.94	0.007	0.023	0.063	0.094	-0.43	0.19	TRUE	FALSE	FALSE	FALSE	0.0089	0.14	0.31	0.57	0.14	0.88	1	0.83	1
thorax	IV	FBgn0037265	spartin	40582	25.03	520.48	0.021	0.0084	0.12	0.044	-1.2	0.36	TRUE	FALSE	FALSE	FALSE	0.075	0.35	0.94	0.98	0.033	0.91	1	0.11	1
thorax	IV	FBgn0040377	Vha36-3	31235	29.02	685.68	0.084	0.0012	0.26	0.0098	-0.34	0.43	TRUE	FALSE	FALSE	FALSE	0.18	0.53	0.94	0.98	0.012	0.52	0.97	0.55	1
thorax	IV	FBgn0266579	tau	326116	29.72	518.42	0.034	0.005	0.16	0.029	-0.52	0.5	TRUE	FALSE	FALSE	FALSE	0.0024	0.09	0.014	0.082	0.59	0.99	1	0.51	1
thorax	IV	FBgn0262617	CG43143	41256	30.08	1781.33	0.14	0.00049	0.36	0.0047	-0.19	0.45	TRUE	FALSE	FALSE	FALSE	0.16	0.5	0.63	0.81	0.056	0.29	0.97	0.96	1
thorax	IV	FBgn0014141	cher	42066	35.52	9420.58	0.019	0.011	0.12	0.055	-0.21	0.32	TRUE	FALSE	FALSE	FALSE	0.94	0.98	0.018	0.096	-0.2	0.0048	0.7	0.32	1
thorax	IV	FBgn0014028	SdhB	35590	35.26	13958.6	0.34	4.6e-05	0.58	0.00069	-0.082	0.38	TRUE	FALSE	FALSE	FALSE	0.11	0.41	0.17	0.4	0.11	0.11	0.89	0.026	1
thorax	IV	FBgn0028699	Rh50	38589	25.34	1140.79	0.067	0.0025	0.23	0.017	-1.8	0.39	TRUE	FALSE	FALSE	FALSE	0.25	0.59	0.73	0.87	-0.3	0.81	1	0.87	1
thorax	IV	FBgn0041789	Pax	35215	31.63	3045.9	0.31	9.4e-05	0.55	0.0013	-0.095	0.44	TRUE	FALSE	FALSE	FALSE	0.13	0.44	0.0032	0.03	-0.3	0.14	0.93	0.58	1
thorax	IV	FBgn0266377	Pde8	7354372	24.83	1266.96	0.12	0.0013	0.32	0.01	-1.1	0.31	TRUE	FALSE	FALSE	FALSE	0.56	0.82	0.39	0.64	-0.57	0.59	0.98	0.11	1
thorax	IV	FBgn0004401	Pep	45961	30.76	1964.78	0.89	2.9e-08	0.95	1.2e-06	-0.016	0.33	TRUE	FALSE	FALSE	FALSE	0.15	0.48	0.057	0.2	0.22	0.26	0.97	0.059	1
thorax	IV	FBgn0038774	CG5023	42400	34.64	1092.6	0.24	0.00032	0.48	0.0034	-0.14	0.5	TRUE	FALSE	FALSE	FALSE	0.78	0.91	0.4	0.65	-0.094	0.039	0.76	0.42	1
thorax	IV	FBgn0086768	Pcmt	40668	31.24	1415.05	0.19	0.00062	0.42	0.0058	-0.17	0.31	TRUE	FALSE	FALSE	FALSE	0.022	0.2	0.038	0.16	0.26	0.7	0.99	0.3	1
thorax	IV	FBgn0005564	Shal	40129	24.09	221.13	0.024	0.019	0.13	0.081	-1.1	0.35	TRUE	FALSE	FALSE	FALSE	0.6	0.83	0.082	0.25	-0.75	0.48	0.97	0.48	1
thorax	IV	FBgn0000667	Actn	31166	37.12	4612.58	0.88	8.4e-08	0.94	3.1e-06	-0.011	0.76	TRUE	FALSE	FALSE	FALSE	0.23	0.57	0.068	0.22	-0.14	0.031	0.76	0.62	1
thorax	IV	FBgn0004574	Rop	38493	29.12	1780.54	0.049	0.0096	0.2	0.048	-0.33	0.24	TRUE	FALSE	FALSE	FALSE	0.00095	0.054	0.0023	0.025	0.52	0.99	1	0.3	1
thorax	IV	FBgn0035370	Non2	38341	29.24	342.48	0.41	9.2e-05	0.64	0.0012	-0.17	0.44	TRUE	FALSE	FALSE	FALSE	0.26	0.59	0.43	0.67	0.15	0.48	0.97	0.042	1
thorax	IV	FBgn0016120	ATPsynD	42291	37.2	7550.18	0.78	1e-06	0.89	2.6e-05	-0.026	0.39	TRUE	FALSE	FALSE	FALSE	0.49	0.77	0.21	0.45	-0.12	0.036	0.76	0.13	1
thorax	IV	FBgn0031836	CG11050	33924	26.56	5566.61	0.077	0.0058	0.25	0.033	-0.57	0.3	TRUE	FALSE	FALSE	FALSE	0.055	0.3	0.00012	0.0035	-1.4	0.89	1	0.24	1
thorax	IV	FBgn0001108	DCTN1-p150	39536	28.04	2167.29	0.41	0.00011	0.64	0.0014	-0.15	0.31	TRUE	FALSE	FALSE	FALSE	0.34	0.67	0.032	0.14	-0.4	0.36	0.97	0.42	1
thorax	IV	FBgn0027493	AdSS	42466	30.21	6026.88	0.099	0.0043	0.29	0.026	-0.21	0.22	TRUE	FALSE	FALSE	FALSE	0.064	0.33	0.32	0.57	0.11	0.45	0.97	0.65	1
thorax	IV	FBgn0010380	AP-1-2beta	32987	28.41	1507.11	0.07	0.008	0.24	0.042	-0.37	0.18	TRUE	FALSE	FALSE	FALSE	0.3	0.64	0.0022	0.024	-0.64	0.4	0.97	0.29	1
thorax	IV	FBgn0259108	futsch	5740544	33.36	3533.88	0.16	0.0022	0.38	0.015	-0.11	0.49	TRUE	FALSE	FALSE	FALSE	0.71	0.89	0.33	0.59	-0.071	0.0046	0.7	0.98	1
thorax	IV	FBgn0259219	CG42319	36473	33.02	2348.43	0.16	0.0024	0.38	0.016	-0.24	0.4	TRUE	FALSE	FALSE	FALSE	0.081	0.36	0.00054	0.0095	-0.65	0.63	0.99	0.34	1
thorax	IV	FBgn0050285	CG30285	246528	26.31	344.12	0.063	0.012	0.23	0.058	-1.4	0.35	TRUE	FALSE	FALSE	FALSE	0.026	0.22	0.17	0.39	0.93	0.97	1	0.11	1
thorax	IV	FBgn0010100	Acon	44149	39.03	53183.2	0.19	0.0025	0.42	0.017	-0.12	0.29	TRUE	FALSE	FALSE	FALSE	0.3	0.64	0.93	0.96	0.0076	0.038	0.76	0.74	1
thorax	IV	FBgn0035593	CG4603	38603	27.59	600.75	0.77	5.3e-06	0.89	0.00011	-0.093	0.46	TRUE	FALSE	FALSE	FALSE	0.44	0.74	0.16	0.38	-0.43	0.5	0.97	0.0028	0.46
thorax	IV	FBgn0030745	CG4239	32606	26.48	1962.35	0.11	0.0075	0.31	0.04	-1.2	0.32	TRUE	FALSE	FALSE	FALSE	0.53	0.8	0.4	0.65	-0.58	0.61	0.98	0.9	1
thorax	IV	FBgn0263258	chas	32748	27.16	1356.67	0.32	0.00073	0.56	0.0066	-0.28	0.49	TRUE	FALSE	FALSE	FALSE	0.76	0.91	0.53	0.74	-0.17	0.28	0.97	0.23	1
thorax	IV	FBgn0035603	Pfdn4	38615	27.65	274.97	0.22	0.0022	0.45	0.015	-0.31	0.34	TRUE	FALSE	FALSE	FALSE	0.83	0.93	0.32	0.58	-0.24	0.22	0.96	0.31	1
thorax	IV	FBgn0261625	GLS	36396	25.16	846.28	0.33	0.00075	0.57	0.0067	-0.64	0.51	TRUE	FALSE	FALSE	FALSE	0.15	0.48	0.28	0.53	0.68	0.86	1	0.28	1
thorax	IV	FBgn0260632	dl	35047	30.28	1810.78	0.39	0.00042	0.62	0.0042	-0.096	0.44	TRUE	FALSE	FALSE	FALSE	0.94	0.98	0.31	0.57	-0.11	0.021	0.71	0.74	1
thorax	IV	FBgn0033426	CG1814	35984	28.63	2474.9	0.066	0.021	0.23	0.087	-0.53	0.28	TRUE	FALSE	FALSE	FALSE	0.79	0.92	0.11	0.3	-0.43	0.26	0.97	0.92	1
thorax	IV	FBgn0010422	TfIIS	34883	24.93	238.5	0.14	0.0076	0.35	0.041	-1.3	0.37	TRUE	FALSE	FALSE	FALSE	0.67	0.87	0.32	0.58	-0.79	0.55	0.97	0.48	1
thorax	IV	FBgn0032646	mEFTs	35060	26.66	1191.4	0.56	0.00013	0.74	0.0016	-0.4	0.35	TRUE	FALSE	FALSE	FALSE	0.79	0.92	0.81	0.91	-0.15	0.46	0.97	0.045	1
thorax	IV	FBgn0250789	alpha-Spec	38231	35.18	13680.7	0.73	2e-05	0.86	0.00034	-0.029	0.3	TRUE	FALSE	FALSE	FALSE	0.5	0.77	0.54	0.75	0.049	0.016	0.7	0.73	1
thorax	IV	FBgn0039112	SdhD	42808	27.48	4482.7	0.15	0.0076	0.38	0.041	-0.52	0.22	TRUE	FALSE	FALSE	FALSE	0.57	0.82	0.48	0.71	-0.24	0.45	0.97	0.21	1
thorax	IV	FBgn0264894	CG44085	34732	30.77	1568.52	0.32	0.0016	0.56	0.012	-0.095	0.55	TRUE	FALSE	FALSE	FALSE	0.38	0.7	0.029	0.13	-0.21	0.047	0.76	0.67	1
thorax	IV	FBgn0032393	CG12264	34613	30.8	3564.57	0.14	0.011	0.35	0.055	-0.17	0.23	TRUE	FALSE	FALSE	FALSE	0.075	0.35	0.28	0.53	0.12	0.36	0.97	0.69	1
thorax	IV	FBgn0004242	Syt1	33473	30.48	1874.49	0.2	0.0058	0.43	0.033	-0.27	0.35	TRUE	FALSE	FALSE	FALSE	0.14	0.46	0.4	0.65	0.16	0.63	0.99	0.052	1
thorax	IV	FBgn0001247	Ide	40248	27.95	2206.96	0.35	0.0017	0.59	0.013	-0.23	0.27	TRUE	FALSE	FALSE	FALSE	0.53	0.8	0.069	0.23	-0.45	0.35	0.97	0.43	1
thorax	IV	FBgn0051363	Jupiter	41392	29.03	708.97	0.21	0.0069	0.44	0.037	-0.22	0.32	TRUE	FALSE	FALSE	FALSE	0.19	0.53	0.55	0.75	0.097	0.46	0.97	0.033	1
thorax	IV	FBgn0001091	Gapdh1	35728	37.96	24792.3	0.98	6e-08	0.99	2.3e-06	-0.0021	0.45	TRUE	FALSE	FALSE	FALSE	0.046	0.28	0.0065	0.051	0.23	0.15	0.93	0.29	1
thorax	IV	FBgn0031093	CG9581	33017	28.11	1108.5	0.35	0.0027	0.59	0.018	-0.25	0.3	TRUE	FALSE	FALSE	FALSE	0.025	0.21	0.02	0.1	0.64	0.93	1	0.93	1
thorax	IV	FBgn0028474	CG4119	31481	25.03	454.2	0.22	0.0093	0.45	0.047	-0.95	0.28	TRUE	FALSE	FALSE	FALSE	0.35	0.68	0.97	0.99	0.024	0.73	1	0.12	1
thorax	IV	FBgn0003435	sm	37254	25.28	2272.79	0.34	0.0035	0.58	0.022	-0.82	0.42	TRUE	FALSE	FALSE	FALSE	0.61	0.84	0.78	0.9	-0.22	0.59	0.98	0.6	1
thorax	IV	FBgn0002021	l(2)37Bb	49427	24.46	546.12	0.13	0.024	0.34	0.096	-0.88	0.22	TRUE	FALSE	FALSE	FALSE	0.038	0.26	0.13	0.34	0.82	0.95	1	0.7	1
thorax	IV	FBgn0031066	COX6B	32989	35.55	6918.74	0.35	0.0032	0.59	0.021	-0.11	0.25	TRUE	FALSE	FALSE	FALSE	0.24	0.57	0.012	0.077	-0.31	0.19	0.95	0.17	1
thorax	IV	FBgn0031912	muc	34021	36.52	7441.06	1	5.6e-10	1	3.9e-08	-0.0002	0.62	TRUE	FALSE	FALSE	FALSE	0.13	0.44	0.032	0.14	0.24	0.27	0.97	0.28	1
thorax	IV	FBgn0031322	CG5001	33308	25.93	880.65	0.97	2.8e-07	0.99	8.7e-06	-0.02	0.49	TRUE	FALSE	FALSE	FALSE	0.17	0.5	0.054	0.2	1.1	0.84	1	0.85	1
thorax	IV	FBgn0259680	Pkcdelta	32191	28.81	3704.05	0.23	0.0095	0.47	0.048	-0.24	0.31	TRUE	FALSE	FALSE	FALSE	0.37	0.69	0.98	0.99	0.0045	0.36	0.97	0.31	1
thorax	IV	FBgn0052649	CG32649	32239	30.06	2048.42	0.57	0.00062	0.76	0.0058	-0.084	0.35	TRUE	FALSE	FALSE	FALSE	0.22	0.56	0.23	0.48	0.17	0.33	0.97	0.48	1
thorax	IV	FBgn0261802	CG42748	35442	26.64	2158.28	0.54	0.00094	0.74	0.008	-0.12	0.29	TRUE	FALSE	FALSE	FALSE	0.45	0.75	0.65	0.82	0.088	0.32	0.97	0.77	1
thorax	IV	FBgn0031673	CG31650	326150	28.38	501.67	0.54	0.00093	0.74	0.0079	-0.18	0.34	TRUE	FALSE	FALSE	FALSE	0.45	0.75	0.65	0.82	0.13	0.48	0.97	0.18	1
thorax	IV	FBgn0038675	CG6013	42286	26.01	306.94	0.2	0.022	0.42	0.089	-0.94	0.29	TRUE	FALSE	FALSE	FALSE	0.058	0.31	0.14	0.35	1	0.94	1	0.23	1
thorax	IV	FBgn0003714	tko	31228	27.07	653.45	0.31	0.012	0.54	0.058	-0.17	0.23	TRUE	FALSE	FALSE	FALSE	0.78	0.91	0.49	0.72	-0.11	0.12	0.91	0.053	1
thorax	IV	FBgn0000636	Fas3	35097	25.97	1181.47	0.34	0.01	0.58	0.05	-0.51	0.28	TRUE	FALSE	FALSE	FALSE	0.59	0.83	0.084	0.25	-0.91	0.53	0.97	0.31	1
thorax	IV	FBgn0035989	CG3967	39086	29.66	582.66	0.86	6.6e-05	0.93	0.00094	-0.024	0.44	TRUE	FALSE	FALSE	FALSE	0.14	0.46	0.052	0.19	0.27	0.41	0.97	0.09	1
thorax	IV	FBgn0034576	ND-B14.7	37385	24.64	4612.3	0.35	0.011	0.59	0.055	-0.5	0.23	TRUE	FALSE	FALSE	FALSE	0.17	0.52	0.0069	0.053	-1.5	0.82	1	0.08	1
thorax	IV	FBgn0028863	CG4587	34921	26.76	597.01	0.28	0.021	0.51	0.085	-0.77	0.32	TRUE	FALSE	FALSE	FALSE	0.27	0.6	0.63	0.81	0.32	0.78	1	0.86	1
thorax	IV	FBgn0031359	Rim2	33350	28.51	3976.37	0.3	0.022	0.53	0.09	-0.21	0.25	TRUE	FALSE	FALSE	FALSE	0.59	0.83	0.07	0.23	-0.35	0.23	0.97	0.21	1
thorax	IV	FBgn0261258	rgn	40368	26.69	1194.67	0.49	0.0064	0.7	0.036	-0.33	0.35	TRUE	FALSE	FALSE	FALSE	0.086	0.37	0.074	0.24	0.85	0.89	1	0.41	1
thorax	IV	FBgn0259678	sqa	36002	26.83	3283.8	0.71	0.0012	0.85	0.0095	-0.12	0.36	TRUE	FALSE	FALSE	FALSE	0.023	0.2	0.0048	0.041	0.93	0.94	1	0.68	1
thorax	IV	FBgn0028336	l(1)G0255	31605	36.32	6915.62	0.31	0.024	0.55	0.094	-0.097	0.2	TRUE	FALSE	FALSE	FALSE	0.85	0.94	0.42	0.66	-0.073	0.012	0.7	0.46	1
thorax	IV	FBgn0069969	CG40498	3354890	26.41	305.57	0.37	0.017	0.6	0.075	-0.46	0.41	TRUE	FALSE	FALSE	FALSE	0.84	0.94	0.22	0.47	-0.6	0.39	0.97	0.53	1
thorax	IV	FBgn0027608	CG2082	40713	26	801.28	0.62	0.0038	0.79	0.023	-0.32	0.41	TRUE	FALSE	FALSE	FALSE	0.038	0.26	0.0014	0.018	-2.3	0.96	1	0.74	1
thorax	IV	FBgn0033602	Cpr47Ee	36193	28.82	127.48	0.55	0.0091	0.74	0.047	-0.11	0.51	TRUE	FALSE	FALSE	FALSE	0.79	0.92	0.8	0.91	-0.045	0.15	0.93	0.33	1
thorax	IV	FBgn0030292	CG11752	32076	31.9	1114.91	0.83	0.00079	0.91	0.007	-0.055	0.35	TRUE	FALSE	FALSE	FALSE	0.13	0.45	0.021	0.11	-0.62	0.73	1	0.74	1
thorax	IV	FBgn0028622	qsm	47065	28.97	920.74	0.83	0.00093	0.91	0.0079	-0.054	0.44	TRUE	FALSE	FALSE	FALSE	0.028	0.23	0.0047	0.04	0.75	0.91	1	0.19	1
thorax	IV	FBgn0038181	CG9297	41688	33.91	11414.6	0.72	0.0032	0.85	0.021	-0.031	0.52	TRUE	FALSE	FALSE	FALSE	0.3	0.64	0.069	0.23	-0.16	0.042	0.76	0.97	1
thorax	IV	FBgn0029851	CG14445	31556	28.22	289.13	0.95	0.00014	0.97	0.0017	-0.019	0.73	TRUE	FALSE	FALSE	FALSE	0.85	0.94	0.84	0.92	0.053	0.25	0.97	0.14	1
thorax	IV	FBgn0034727	mRpS29	37563	25.7	422.08	0.61	0.013	0.78	0.06	-0.27	0.3	TRUE	FALSE	FALSE	FALSE	0.11	0.42	0.078	0.24	0.91	0.87	1	0.34	1
thorax	IV	FBgn0039358	CG5028	43102	35.65	9299.14	0.84	0.0017	0.92	0.013	-0.014	0.39	TRUE	FALSE	FALSE	FALSE	0.66	0.87	0.4	0.65	-0.056	0.0028	0.7	0.17	1
thorax	IV	FBgn0033608	CG13220	36200	30.6	1583.94	0.58	0.017	0.76	0.075	-0.08	0.23	TRUE	FALSE	FALSE	FALSE	0.68	0.88	1	1	9.2e-05	0.098	0.89	0.43	1
thorax	IV	FBgn0003074	Pgi	35886	34.27	16896.5	0.81	0.003	0.9	0.019	-0.032	0.29	TRUE	FALSE	FALSE	FALSE	0.013	0.16	0.0005	0.0091	-0.52	0.8	1	0.11	1
thorax	IV	FBgn0038805	TFAM	42433	33.02	920.01	0.57	0.02	0.75	0.085	-0.079	0.2	TRUE	FALSE	FALSE	FALSE	0.26	0.59	0.29	0.55	0.14	0.26	0.97	0.41	1
thorax	IV	FBgn0033038	CG7791	35511	26.27	1541.93	0.69	0.013	0.84	0.061	-0.12	0.28	TRUE	FALSE	FALSE	FALSE	0.74	0.9	0.37	0.62	-0.25	0.3	0.97	0.73	1
thorax	IV	FBgn0014411	Vps26	31144	27.81	698.81	0.59	0.025	0.77	0.097	-0.23	0.25	TRUE	FALSE	FALSE	FALSE	0.0034	0.1	0.00042	0.0081	1.8	0.99	1	0.37	1
thorax	IV	FBgn0033226	CG1882	35733	28.11	2496.58	0.88	0.0027	0.94	0.018	-0.022	0.26	TRUE	FALSE	FALSE	FALSE	0.37	0.69	0.25	0.51	0.16	0.21	0.96	0.13	1
thorax	IV	FBgn0022344	CG10340	42020	29	1069.85	0.98	0.00022	0.99	0.0025	-0.0053	0.29	TRUE	FALSE	FALSE	FALSE	0.089	0.38	0.019	0.099	0.59	0.77	1	0.11	1
thorax	IV	FBgn0032486	mRF1	34720	24.99	298.37	0.82	0.025	0.91	0.097	-0.2	0.27	TRUE	FALSE	FALSE	FALSE	0.62	0.85	0.63	0.81	0.39	0.58	0.98	0.43	1
thorax	IV	FBgn0037544	CG11035	40953	26.22	650.72	0.91	0.012	0.95	0.059	-0.098	0.25	TRUE	FALSE	FALSE	FALSE	0.16	0.5	0.037	0.16	-1.7	0.87	1	0.39	1
thorax	IV	FBgn0035001	Slik	37893	25.54	3068.93	0.96	0.0049	0.98	0.029	-0.034	0.22	TRUE	FALSE	FALSE	FALSE	0.75	0.9	0.61	0.8	-0.35	0.49	0.97	0.47	1
thorax	IV	FBgn0051973	Cda5	33158	27.03	1153.87	0.94	0.01	0.97	0.051	-0.054	0.39	TRUE	FALSE	FALSE	FALSE	0.59	0.83	0.39	0.64	-0.61	0.58	0.98	0.66	1
thorax	IV	FBgn0030272	CG15201	32053	28.61	1166.99	0.96	0.012	0.98	0.059	-0.01	0.22	TRUE	FALSE	FALSE	FALSE	0.63	0.85	0.44	0.68	-0.13	0.19	0.95	0.35	1
thorax	IV	FBgn0027596	Kank	36668	26.78	1699.93	0.96	0.024	0.98	0.095	-0.022	0.2	TRUE	FALSE	FALSE	FALSE	0.99	1	0.96	0.99	-0.017	0.27	0.97	0.52	1
