# Supplementary material for: Tissue-specific modulation of gene expression in response to lowered insulin signalling in Drosophila
Source: eLife. 2021 Apr 21;10:e67275. doi: 10.7554/eLife.67275 (PMC8060030; doi:10.7554/eLife.67275)
Supplement: Supplementary file 4. — Columns listed as: Tissue, Quadrant (Quadrants by direction of log2(fold-change): I (protein+;transcript+), II (protein−;transcript+), III (protein−;transcript−), and IV (protein+;transcript−)), Protein flybase ID, protein symbol (Gene name), protein entrez ID, protein avg expr (Average LFQ intensity of this protein in all samples in the respective tissue), RNA avg expr (Average transcript expression of the corresponding transcript in the respective tissue), protein p-value (dilp2-3,5 v. wDah), RNA p-value (dilp2-3,5 v. wDah), Protein adj p-value (dilp2-3,5 v. wDah FDR), Protein logFC (dilp2-3,5 v. wDah), RNA LogFC (dilp2-3,5 v. wDah), opposite (Are protein and transcript changed in opposite direction?), Wolbachia dependence (Does the protein change in dilp2-3,5 vs wDah depend on Wolbachia status?), Wolbachia independence (Is the protein change in dilp2-3,5 vs wDah independent of Wolbachia status?), RNA Wolbachia dependence (Does the transcript change in dilp2-3,5 vs wDah depend on Wolbachia status?), interaction p-value (Protein p-value, interaction term (dilp2-3,5 vs. wDah ~ Wol+ vs. Wol-)), interaction adj p-value (Protein FDR, interaction term (dilp2-3,5 vs. wDah ~ Wol+ vs. Wol-)), dilpT p-value (Protein p-value, dilp2-3,5/Wol- vs. wDah/Wol-), dilpT adj p-value (Protein FDR, dilp2-3,5/Wol- vs. wDah/Wol-), protein LogFC (Protein log2(fold-change), dilp2-3,5/Wol- vs. wDah/Wol-), TOST P-value (Protein p-value, two-one-sided-t-test of equivalence, interaction term (dilp2-3,5 vs. wDah ~ Wol+ vs. Wol-)), TOST adj p-value (Protein p-value, two-one-sided-t-test of equivalence, interaction term (dilp2-3,5 vs. wDah ~ Wol+ vs. Wol-)). Wol+/- denotes the presence (+) or absence (-) of Wolbachia in formulae. Genotypes denoted as wDah and dilp (2-3,5) with Wolbachia and wDahT and dilpT (2-3,5) without Wolbachia. [file elife-67275-supp4.xlsx]

## Sheet: Sheet1
tissue	Quadrant	PROT.flybase	PROT.symbol	PROT.entrez	PROT.AveExpr	RNA.AveExpr	PROT.P.Value	RNA.P.Value	PROT.adj.P.Val	RNA.adj.P.Val	PROT.logFC	RNA.logFC	opposite	wolDependent	wolIndependent	rna.wolDependent	interaction.P.Value	interaction.adj.P.Val	dilpT.P.Value	dilpT.adj.P.Val	protein.logFC	TOST.P.Value	TOST.adj.P.Val	rna.interaction.P.Value	rna.interaction.adj.P.Val
fat	I	FBgn0036121	CG6310	39237	26.88	132.47	7.6e-10	3.5e-13	1.4e-07	1e-10	1.5	1.9	FALSE	FALSE	FALSE	FALSE	0.0025	0.018	2.1e-06	3.8e-05	0.87	0.94	1	0.52	0.75
fat	I	FBgn0003996	w	31271	24.66	2966.04	4e-05	6.5e-32	0.00047	3.1e-28	3	4.5	FALSE	FALSE	FALSE	FALSE	0.64	0.78	0.00016	0.0011	2.6	0.51	1	0.077	0.35
fat	I	FBgn0038074	Gnmt	41561	28.42	2171.62	5.6e-09	4e-09	6.6e-07	4.9e-07	3.3	1.8	FALSE	FALSE	FALSE	FALSE	1e-06	7e-05	8e-14	8.6e-11	6.6	1	1	0.026	0.26
fat	I	FBgn0040211	hgo	34552	30.79	2796.19	5.2e-10	1.6e-06	1.1e-07	9.2e-05	1.3	1.4	FALSE	FALSE	FALSE	FALSE	0.18	0.34	4.6e-11	8.4e-09	1.6	0.22	0.76	0.05	0.3
fat	I	FBgn0001248	Idh	44291	36.34	31543.3	2.2e-10	3.4e-06	6e-08	0.00018	0.58	1.1	FALSE	FALSE	TRUE	FALSE	0.21	0.38	2.5e-11	6.1e-09	0.66	0.00041	0.11	0.041	0.29
fat	I	FBgn0037697	GstZ2	41133	26.95	924.45	1.5e-07	4.2e-08	6.1e-06	3.9e-06	0.99	1.4	FALSE	FALSE	FALSE	TRUE	0.00023	0.0032	0.076	0.14	0.22	0.99	1	0.0013	0.061
fat	I	FBgn0031184	CG14615	33129	29.98	1379.9	1.9e-05	9.9e-11	0.00027	1.7e-08	0.67	1.4	FALSE	FALSE	FALSE	FALSE	0.045	0.13	0.014	0.037	0.32	0.53	1	0.014	0.2
fat	I	FBgn0033203	CG2070	35706	30.66	3308.5	2.5e-06	4.6e-09	5.3e-05	5.5e-07	0.59	1.4	FALSE	FALSE	FALSE	FALSE	0.0069	0.036	2.1e-09	1.9e-07	0.97	0.62	1	0.017	0.22
fat	I	FBgn0014427	CG11899	46391	34.71	5989.33	5.2e-12	0.00028	7.5e-09	0.007	0.95	1	FALSE	FALSE	FALSE	FALSE	7e-06	0.00025	3.2e-15	1.4e-11	1.5	0.98	1	0.087	0.37
fat	I	FBgn0036992	CG11796	40263	32.89	7033.24	2.3e-09	9.1e-06	3.5e-07	0.00041	0.76	1.2	FALSE	FALSE	FALSE	FALSE	1.3e-07	2.1e-05	1.4e-14	3e-11	1.6	1	1	0.069	0.34
fat	I	FBgn0085484	Pdxk	39066	32.93	2035.95	1.7e-08	2.7e-06	1.3e-06	0.00015	0.74	0.91	FALSE	FALSE	FALSE	FALSE	0.0023	0.017	2.4e-11	6.1e-09	1.1	0.66	1	0.092	0.37
fat	I	FBgn0037057	CG10512	40339	32.41	1361.12	3.4e-09	1.5e-05	4.7e-07	0.00064	0.79	0.83	FALSE	FALSE	FALSE	TRUE	0.018	0.071	3.2e-11	6.9e-09	1.1	0.24	0.79	0.0007	0.04
fat	I	FBgn0033879	CG6543	36536	34.6	2683.89	1.5e-08	2.2e-05	1.2e-06	0.0009	0.61	0.9	FALSE	FALSE	TRUE	FALSE	0.13	0.27	6.2e-10	7.5e-08	0.75	0.017	0.27	0.12	0.41
fat	I	FBgn0016675	Lectin-galC1	35216	27.72	5607.85	7.6e-05	8.1e-09	0.00078	9e-07	0.71	1.5	FALSE	FALSE	FALSE	TRUE	0.0039	0.024	1.5e-08	7.9e-07	1.4	0.93	1	9e-06	0.0012
fat	I	FBgn0001098	Gdh	42832	33.85	2318.28	1.2e-07	1e-05	5.2e-06	0.00047	0.68	0.64	FALSE	FALSE	TRUE	FALSE	0.64	0.77	3.8e-07	1e-05	0.63	0.011	0.22	0.068	0.33
fat	I	FBgn0037817	Cyp12e1	41272	29.56	545.31	3.8e-09	0.00016	5e-07	0.0047	0.76	0.95	FALSE	FALSE	TRUE	FALSE	0.98	0.99	3.6e-09	2.8e-07	0.76	0.0017	0.13	0.0067	0.15
fat	I	FBgn0035298	SCOT	38261	33.11	2614.49	3e-08	6.8e-05	2e-06	0.0023	0.89	0.96	FALSE	FALSE	TRUE	FALSE	0.67	0.8	7.9e-08	3e-06	0.83	0.025	0.31	0.12	0.41
fat	I	FBgn0036824	CG3902	40059	34.88	5488.52	6.4e-07	8.6e-06	1.8e-05	0.00039	0.54	1	FALSE	FALSE	TRUE	FALSE	0.13	0.28	1.5e-08	8.2e-07	0.7	0.046	0.4	0.07	0.34
fat	I	FBgn0027348	bgm	44117	32.69	4577.82	1.5e-07	5.6e-05	6.1e-06	0.002	0.75	0.97	FALSE	FALSE	TRUE	FALSE	0.58	0.73	5.9e-07	1.5e-05	0.68	0.025	0.31	0.1	0.39
fat	I	FBgn0036290	CG10638	39424	31.56	678.56	8.8e-11	0.0088	2.7e-08	0.09	1.1	0.69	FALSE	FALSE	TRUE	FALSE	0.27	0.45	1.4e-11	4.4e-09	1.3	0.047	0.4	0.58	0.79
fat	I	FBgn0030968	CG7322	32880	33.61	1357.02	1.1e-07	0.00022	5.1e-06	0.0058	0.52	1.1	FALSE	FALSE	TRUE	FALSE	0.84	0.9	1.8e-07	5.8e-06	0.51	0.00078	0.13	0.017	0.22
fat	I	FBgn0063491	GstE9	246581	33.5	8569.28	4e-06	1.6e-05	7.4e-05	0.00071	0.61	1.2	FALSE	FALSE	FALSE	TRUE	0.045	0.13	0.0025	0.0095	0.33	0.34	0.9	0.0025	0.088
fat	I	FBgn0027657	glob1	41930	34.98	6930.91	5.4e-09	0.0023	6.5e-07	0.035	0.82	0.71	FALSE	FALSE	FALSE	FALSE	0.0017	0.013	8.5e-12	3.3e-09	1.2	0.73	1	0.0084	0.17
fat	I	FBgn0030575	CG5321	32399	31.25	2569.23	7.6e-08	0.0016	4.1e-06	0.027	0.68	0.98	FALSE	FALSE	TRUE	FALSE	0.75	0.85	1.6e-07	5.4e-06	0.65	0.0064	0.18	0.039	0.28
fat	I	FBgn0036337	AdenoK	39479	32.75	3708.72	5.9e-05	8e-06	0.00062	0.00037	0.81	1	FALSE	FALSE	FALSE	FALSE	0.53	0.69	0.00041	0.0022	0.67	0.18	0.71	0.0034	0.1
fat	I	FBgn0263199	Galk	39031	33.52	9323.26	8.4e-09	0.0061	8.2e-07	0.07	0.81	0.74	FALSE	FALSE	TRUE	FALSE	0.16	0.32	4.8e-10	6.1e-08	0.97	0.067	0.47	0.05	0.3
fat	I	FBgn0021765	scu	32789	35.65	6005.08	1e-07	0.0017	4.9e-06	0.028	0.56	0.78	FALSE	FALSE	TRUE	FALSE	0.38	0.56	1.4e-08	7.6e-07	0.64	0.0061	0.18	0.12	0.4
fat	I	FBgn0016013	Faa	45577	30.75	999.25	1.6e-06	0.00044	3.8e-05	0.01	0.63	0.98	FALSE	FALSE	FALSE	FALSE	6e-05	0.0012	3.4e-11	6.9e-09	1.3	0.99	1	0.08	0.35
fat	I	FBgn0000064	Ald	43183	36.9	11525.8	5.4e-05	2.3e-05	0.00058	0.00095	0.31	0.69	FALSE	FALSE	FALSE	TRUE	0.00018	0.0027	7e-10	7.8e-08	0.7	0.72	1	0.00068	0.039
fat	I	FBgn0027945	ppl	40349	32	3192.98	4.4e-08	0.0051	2.7e-06	0.063	0.96	0.77	FALSE	FALSE	FALSE	FALSE	0.17	0.32	1.5e-06	3.1e-05	0.74	0.21	0.74	0.021	0.24
fat	I	FBgn0022359	Sodh-2	41313	28.63	843.4	1.3e-06	0.00079	3.3e-05	0.016	0.94	0.96	FALSE	FALSE	FALSE	TRUE	0.0011	0.0099	0.11	0.2	0.22	0.97	1	0.0032	0.098
fat	I	FBgn0026077	Gasp	40745	27.2	172.66	9.5e-09	0.016	8.8e-07	0.13	1.7	0.59	FALSE	FALSE	FALSE	FALSE	0.11	0.24	4.9e-07	1.3e-05	1.3	0.62	1	0.066	0.33
fat	I	FBgn0038516	P5cr-2	42106	31.47	1559.33	7e-08	0.0071	3.9e-06	0.078	0.94	0.81	FALSE	FALSE	FALSE	FALSE	0.024	0.086	4.8e-05	0.0004	0.57	0.58	1	0.017	0.23
fat	I	FBgn0040064	yip2	34313	36	8542.93	6.9e-09	0.024	7.5e-07	0.17	0.64	0.56	FALSE	FALSE	TRUE	FALSE	0.037	0.12	1e-10	1.7e-08	0.84	0.06	0.45	0.09	0.37
fat	I	FBgn0020385	pug	41279	34.99	15464.3	3.2e-07	0.0038	1.1e-05	0.051	0.44	0.84	FALSE	FALSE	FALSE	FALSE	0.001	0.0092	1e-10	1.7e-08	0.75	0.34	0.9	0.014	0.2
fat	I	FBgn0038771	CG4390	42396	30.59	1294.89	2.1e-05	0.00023	0.00029	0.0061	0.65	0.92	FALSE	FALSE	FALSE	FALSE	0.058	0.16	0.01	0.03	0.32	0.46	0.98	0.1	0.39
fat	I	FBgn0034354	GstE11	37128	28.46	180.15	2.7e-08	0.021	1.9e-06	0.16	1.3	0.58	FALSE	TRUE	FALSE	FALSE	8e-05	0.0015	0.04	0.086	0.31	1	1	0.67	0.84
fat	I	FBgn0037687	CG8132	41121	30.85	869.22	3.5e-06	0.0015	6.8e-05	0.026	0.43	0.75	FALSE	FALSE	FALSE	FALSE	0.0027	0.019	1.2e-09	1.2e-07	0.76	0.42	0.96	0.033	0.27
fat	I	FBgn0038876	CG5919	42526	28.14	582.69	0.0065	3.1e-07	0.026	2.3e-05	0.64	1.3	FALSE	FALSE	FALSE	FALSE	0.1	0.23	0.52	0.63	0.14	0.71	1	0.11	0.39
fat	I	FBgn0014455	Ahcy	32471	33.42	5909.97	0.00089	7.3e-06	0.0055	0.00034	0.48	0.7	FALSE	FALSE	FALSE	FALSE	0.052	0.15	2e-06	3.8e-05	0.84	0.53	1	0.18	0.48
fat	I	FBgn0036053	iPLA2-VIA	39160	29.37	3053.21	6.5e-07	0.0046	1.8e-05	0.058	0.63	0.54	FALSE	FALSE	FALSE	FALSE	0.0057	0.031	6.7e-10	7.8e-08	1	0.61	1	0.89	0.95
fat	I	FBgn0016715	Reg-2	38075	32.22	1048.39	2.3e-05	0.00042	0.00031	0.0097	0.53	0.99	FALSE	FALSE	FALSE	FALSE	0.019	0.073	3e-08	1.4e-06	0.88	0.51	1	0.013	0.2
fat	I	FBgn0032002	CG8353	34123	29.52	659.09	1.1e-06	0.0039	2.8e-05	0.052	1.1	0.75	FALSE	FALSE	FALSE	FALSE	0.34	0.52	1.6e-05	0.00017	0.86	0.26	0.82	0.015	0.21
fat	I	FBgn0010387	Dbi	38784	35.05	5950.18	0.003	1.7e-06	0.015	0.0001	0.35	1.2	FALSE	FALSE	TRUE	FALSE	0.72	0.84	0.0091	0.027	0.3	0.03	0.33	0.014	0.2
fat	I	FBgn0085453	CG34424	37699	31.76	2281.39	5e-05	0.00024	0.00055	0.0063	0.36	1.1	FALSE	FALSE	FALSE	FALSE	5.7e-07	5.1e-05	5.8e-12	2.8e-09	1.1	1	1	0.0045	0.12
fat	I	FBgn0262782	Mdh1	34414	35.13	13610.1	2.8e-06	0.0028	5.6e-05	0.04	0.56	0.77	FALSE	FALSE	TRUE	FALSE	0.14	0.29	5.8e-08	2.3e-06	0.74	0.095	0.55	0.04	0.28
fat	I	FBgn0020236	ATPCL	36760	35.85	23647.9	8.9e-08	0.019	4.5e-06	0.15	0.48	0.6	FALSE	FALSE	FALSE	FALSE	0.0046	0.027	1.3e-10	2e-08	0.73	0.13	0.63	0.31	0.59
fat	I	FBgn0034390	CG15093	37166	32.38	1237.8	2.2e-07	0.012	8.3e-06	0.11	0.74	0.49	FALSE	TRUE	FALSE	FALSE	4.3e-05	0.00096	0.61	0.71	0.047	0.99	1	0.76	0.89
fat	I	FBgn0039241	CG11089	42973	34.91	6836.63	3.6e-07	0.011	1.1e-05	0.1	0.74	0.52	FALSE	FALSE	FALSE	FALSE	0.015	0.062	1e-09	1e-07	1.1	0.56	1	0.00041	0.028
fat	I	FBgn0036271	Pbgs	39402	29.53	1216.71	0.00062	4.9e-05	0.0042	0.0018	0.34	1	FALSE	FALSE	FALSE	FALSE	0.00021	0.003	0.027	0.062	-0.2	0.95	1	0.049	0.3
fat	I	FBgn0011227	ox	45401	31.75	890.28	1.7e-05	0.0015	0.00024	0.026	0.91	0.68	FALSE	FALSE	FALSE	FALSE	0.041	0.13	0.014	0.038	0.43	0.74	1	0.027	0.26
fat	I	FBgn0032820	fbp	35265	35.41	12078.5	1.6e-06	0.007	3.8e-05	0.077	0.52	0.78	FALSE	FALSE	FALSE	FALSE	0.033	0.11	6.9e-09	4.5e-07	0.76	0.17	0.69	0.021	0.24
fat	I	FBgn0004888	Scsalpha	38447	34.65	8808.61	0.00034	0.00011	0.0026	0.0033	0.4	0.84	FALSE	FALSE	TRUE	TRUE	0.66	0.78	8.5e-05	0.00063	0.46	0.021	0.28	0.0022	0.084
fat	I	FBgn0027654	jdp	43630	28.44	232.83	3.7e-06	0.0044	7.1e-05	0.056	1	0.66	FALSE	FALSE	TRUE	FALSE	0.91	0.95	5.1e-06	7.2e-05	1	0.088	0.52	0.0038	0.11
fat	I	FBgn0037749	CG9471	41197	30.95	583.77	2.3e-05	0.0014	0.00031	0.024	0.43	0.56	FALSE	FALSE	TRUE	FALSE	0.46	0.63	0.00022	0.0013	0.35	0.013	0.24	0.038	0.28
fat	I	FBgn0000261	Cat	40048	36.35	26410.6	0.00014	0.00031	0.0013	0.0076	0.23	0.86	FALSE	FALSE	TRUE	FALSE	0.13	0.27	1.5e-06	3e-05	0.34	0.0015	0.13	0.1	0.39
fat	I	FBgn0035348	CG16758	38315	32.17	7963.03	2.4e-06	0.007	5.1e-05	0.077	0.55	0.57	FALSE	FALSE	FALSE	TRUE	2.6e-09	1.5e-06	2.2e-14	3.2e-11	1.8	1	1	0.0028	0.093
fat	I	FBgn0025814	Mgstl	44110	31.35	3541.91	4.6e-05	0.001	0.00052	0.02	0.67	0.85	FALSE	FALSE	FALSE	FALSE	0.24	0.41	0.002	0.0077	0.45	0.24	0.79	0.036	0.28
fat	I	FBgn0026428	HDAC6	32461	31.29	13663.2	4.3e-06	0.0066	7.9e-05	0.074	0.56	0.79	FALSE	FALSE	FALSE	FALSE	0.02	0.076	8.9e-09	5.5e-07	0.87	0.4	0.94	0.062	0.33
fat	I	FBgn0032350	CG6287	34554	35.26	8342.98	2.3e-05	0.0022	0.00031	0.034	0.45	0.76	FALSE	FALSE	TRUE	FALSE	0.21	0.38	6.5e-07	1.6e-05	0.6	0.053	0.42	0.058	0.32
fat	I	FBgn0020513	Paics	32228	35.25	24026.6	6.9e-09	0.11	7.5e-07	0.4	0.61	0.37	FALSE	FALSE	TRUE	FALSE	0.88	0.93	5e-09	3.5e-07	0.62	0.00052	0.12	0.0094	0.17
fat	I	FBgn0001104	Galphai	38765	27.04	835.62	1.8e-06	0.016	4.1e-05	0.13	0.88	0.48	FALSE	TRUE	FALSE	FALSE	0.00015	0.0024	0.85	0.89	0.025	1	1	0.41	0.67
fat	I	FBgn0034335	GstE1	37106	32.01	1160.38	0.00017	0.00076	0.0015	0.015	0.39	0.89	FALSE	FALSE	TRUE	FALSE	0.73	0.84	5.8e-05	0.00046	0.43	0.0097	0.21	0.031	0.27
fat	I	FBgn0023212	EloB	42435	30.85	1314.65	0.01	4.9e-06	0.037	0.00025	0.24	0.99	FALSE	FALSE	FALSE	TRUE	5.4e-07	5e-05	8.2e-11	1.4e-08	1.2	1	1	0.00019	0.015
fat	I	FBgn0036262	CG6910	39391	28.64	11613.7	0.011	5.7e-06	0.038	0.00028	0.47	1.2	FALSE	FALSE	FALSE	TRUE	0.19	0.35	0.00015	0.001	0.79	0.47	0.98	0.0012	0.059
fat	I	FBgn0031971	Sirup	34089	27.49	885.37	0.00033	0.00073	0.0025	0.015	0.64	0.73	FALSE	FALSE	FALSE	FALSE	0.24	0.42	9.1e-06	0.00011	0.89	0.33	0.89	0.0056	0.13
fat	I	FBgn0265137	Spn42Da	49805	24.99	4064.92	3e-09	0.22	4.3e-07	0.55	2.6	0.33	FALSE	TRUE	FALSE	FALSE	3.6e-05	0.00085	0.0058	0.019	0.75	1	1	0.22	0.52
fat	I	FBgn0032945	CG8665	35407	34.05	6100.77	3.2e-07	0.06	1.1e-05	0.3	0.59	0.46	FALSE	FALSE	FALSE	FALSE	2.3e-06	0.00012	1.3e-12	9.2e-10	1.3	1	1	0.25	0.54
fat	I	FBgn0037696	GstZ1	41132	28.45	133.87	2.6e-06	0.024	5.4e-05	0.17	0.65	0.58	FALSE	FALSE	FALSE	FALSE	0.00029	0.0038	0.66	0.75	0.043	0.97	1	0.22	0.51
fat	I	FBgn0025454	Cyp6g1	36316	32.66	25070.5	0.0023	0.00011	0.012	0.0035	0.27	1	FALSE	FALSE	FALSE	FALSE	5.3e-05	0.0011	2.4e-09	2.1e-07	0.84	0.98	1	0.21	0.51
fat	I	FBgn0051713	Apf	318908	28.32	123.92	4.6e-05	0.0048	0.00052	0.06	0.58	0.57	FALSE	FALSE	FALSE	FALSE	0.1	0.23	0.009	0.027	0.32	0.3	0.87	0.095	0.38
fat	I	FBgn0031942	CG7203	34055	34.07	10.49	4.9e-06	0.02	8.9e-05	0.16	0.97	0.9	FALSE	FALSE	FALSE	FALSE	0.45	0.62	4.5e-05	0.00039	0.81	0.21	0.75	0.075	0.35
fat	I	FBgn0026718	fu12	34176	27.43	2199.57	1.9e-09	0.29	2.9e-07	0.61	1.1	0.32	FALSE	FALSE	FALSE	FALSE	0.011	0.051	1.1e-06	2.4e-05	0.74	0.68	1	0.43	0.68
fat	I	FBgn0036030	CG6767	39132	33.63	3793.29	2e-07	0.1	7.7e-06	0.39	0.87	0.36	FALSE	FALSE	FALSE	FALSE	0.037	0.12	1.5e-09	1.4e-07	1.2	0.49	1	0.019	0.24
fat	I	FBgn0034382	CG18609	37158	24.1	5434.31	0.00033	0.0017	0.0026	0.028	1.9	0.79	FALSE	FALSE	FALSE	TRUE	0.76	0.86	0.00013	0.00088	2.1	0.4	0.94	0.00019	0.015
fat	I	FBgn0023507	D2hgdh	31184	34.29	16534.3	1.7e-06	0.054	3.9e-05	0.28	0.45	0.56	FALSE	FALSE	FALSE	FALSE	0.014	0.06	0.0054	0.018	0.2	0.15	0.66	0.14	0.43
fat	I	FBgn0011770	Gip	31960	33.32	3505.57	2.3e-06	0.049	5e-05	0.26	0.43	0.49	FALSE	FALSE	FALSE	FALSE	0.00048	0.0053	2.1e-10	2.9e-08	0.8	0.65	1	0.22	0.52
fat	I	FBgn0034356	CG10924	37130	25.78	525.84	0.00029	0.0026	0.0023	0.038	1.5	0.89	FALSE	FALSE	FALSE	FALSE	0.19	0.36	5.4e-06	7.5e-05	2.1	0.73	1	0.026	0.26
fat	I	FBgn0033446	CG1648	36009	35.39	49894.8	0.00094	0.00093	0.0057	0.018	0.65	1	FALSE	FALSE	FALSE	FALSE	0.31	0.49	3.8e-05	0.00034	0.89	0.34	0.9	0.069	0.33
fat	I	FBgn0038257	smp-30	41786	33.92	3629.75	1.3e-06	0.067	3.2e-05	0.32	0.58	0.52	FALSE	FALSE	FALSE	FALSE	0.0016	0.013	3.8e-10	5e-08	1	0.76	1	0.11	0.4
fat	I	FBgn0025352	Thiolase	37784	35.31	5812.46	3.6e-06	0.044	6.9e-05	0.25	0.45	0.5	FALSE	FALSE	TRUE	FALSE	0.22	0.39	0.00014	0.00094	0.33	0.018	0.28	0.15	0.44
fat	I	FBgn0029823	Shmt	31524	35.92	7764.97	5.7e-08	0.19	3.3e-06	0.51	0.57	0.35	FALSE	FALSE	FALSE	FALSE	0.0018	0.014	4.7e-11	8.4e-09	0.91	0.47	0.98	0.13	0.42
fat	I	FBgn0029828	CG6067	31529	30.72	5595.59	0.00064	0.0015	0.0043	0.026	0.65	0.96	FALSE	FALSE	FALSE	FALSE	0.53	0.69	0.0047	0.016	0.51	0.19	0.72	0.041	0.29
fat	I	FBgn0035044	CG3663	37944	30.87	546.76	0.0012	0.00082	0.0069	0.016	0.39	0.7	FALSE	FALSE	FALSE	FALSE	0.05	0.14	2.4e-06	4.2e-05	0.69	0.39	0.94	0.029	0.26
fat	I	FBgn0023023	CRMP	40675	31.28	620.76	8.2e-05	0.0083	0.00082	0.086	0.33	0.6	FALSE	FALSE	FALSE	FALSE	0.014	0.058	5.7e-08	2.3e-06	0.58	0.16	0.68	0.024	0.25
fat	I	FBgn0086691	UK114	34897	34.22	3177.85	0.0057	0.00014	0.024	0.0042	0.39	0.98	FALSE	FALSE	FALSE	FALSE	0.29	0.47	0.12	0.21	0.2	0.2	0.73	0.0043	0.11
fat	I	FBgn0017558	Pdk	35970	31.25	3670	8.4e-07	0.086	2.3e-05	0.36	0.81	0.32	FALSE	FALSE	FALSE	FALSE	0.15	0.31	5.3e-05	0.00044	0.58	0.24	0.79	0.02	0.24
fat	I	FBgn0030839	CG5613	32726	25.85	228.17	0.0052	0.00017	0.022	0.0047	0.6	0.8	FALSE	FALSE	FALSE	FALSE	0.94	0.97	0.0065	0.02	0.58	0.12	0.61	0.61	0.8
fat	I	FBgn0033373	CG8080	35918	31.19	1659.89	2e-05	0.022	0.00028	0.17	0.51	0.57	FALSE	FALSE	FALSE	FALSE	0.026	0.091	3.8e-08	1.7e-06	0.82	0.4	0.94	0.058	0.32
fat	I	FBgn0039896	yellow-h	43779	25.39	58.28	0.003	0.0004	0.014	0.0093	0.78	1	FALSE	FALSE	FALSE	FALSE	0.61	0.75	0.00059	0.003	0.95	0.3	0.86	0.061	0.33
fat	I	FBgn0035901	CG6745	38969	25.56	186.02	2.4e-05	0.022	0.00031	0.17	0.96	0.63	FALSE	FALSE	FALSE	FALSE	0.00083	0.0079	1	1	-0.00095	0.99	1	0.089	0.37
fat	I	FBgn0032382	Mal-B2	34598	32.83	19524.1	1.1e-05	0.034	0.00018	0.21	0.58	0.69	FALSE	FALSE	FALSE	FALSE	2.2e-08	6.4e-06	2.2e-13	1.9e-10	1.9	1	1	0.18	0.48
fat	I	FBgn0027552	CG10863	38463	34.09	4286.24	0.0031	0.00051	0.015	0.011	0.18	0.82	FALSE	FALSE	FALSE	FALSE	6.7e-05	0.0013	3.6e-09	2.8e-07	0.57	0.72	1	0.0042	0.11
fat	I	FBgn0026250	eIF1A	44260	29.49	3173.72	0.00011	0.011	0.001	0.1	0.74	0.5	FALSE	FALSE	FALSE	FALSE	0.28	0.45	0.0035	0.012	0.5	0.31	0.87	0.023	0.25
fat	I	FBgn0033448	hebe	36011	27.36	823.42	1.3e-05	0.037	0.0002	0.22	0.77	0.5	FALSE	FALSE	FALSE	FALSE	0.5	0.66	1.9e-06	3.6e-05	0.89	0.13	0.62	0.32	0.61
fat	I	FBgn0260747	Chchd2	32701	29.45	915.04	0.0023	0.00078	0.012	0.016	0.61	0.56	FALSE	FALSE	FALSE	TRUE	0.48	0.65	0.021	0.052	0.43	0.25	0.81	0.0026	0.09
fat	I	FBgn0001125	Got2	33373	34.98	4541.47	0.0007	0.0027	0.0045	0.04	0.38	0.62	FALSE	FALSE	FALSE	FALSE	0.03	0.1	0.45	0.57	0.071	0.41	0.95	0.29	0.58
fat	I	FBgn0013954	FK506-bp2	37214	33.86	2860.19	0.00019	0.008	0.0016	0.084	0.33	0.39	FALSE	FALSE	TRUE	FALSE	0.97	0.98	0.00017	0.0011	0.33	0.0015	0.13	0.25	0.54
fat	I	FBgn0053054	CG33054	40340	30.34	301.97	0.003	0.00075	0.014	0.015	0.41	0.77	FALSE	FALSE	FALSE	TRUE	0.00079	0.0077	4.1e-08	1.8e-06	1.1	0.97	1	0.002	0.08
fat	I	FBgn0015037	Cyp4p1	45524	30.67	2353.18	0.00013	0.012	0.0012	0.11	0.37	0.54	FALSE	FALSE	FALSE	FALSE	0.055	0.15	4.2e-07	1.1e-05	0.58	0.13	0.63	0.0092	0.17
fat	I	FBgn0000406	Cyt-b5-r	35008	33.51	46267.1	0.00014	0.012	0.0013	0.11	0.42	0.75	FALSE	FALSE	TRUE	FALSE	0.81	0.89	0.00029	0.0017	0.39	0.011	0.22	0.14	0.43
fat	I	FBgn0002719	Men	47173	36.81	83057.7	0.00015	0.014	0.0013	0.12	0.43	0.75	FALSE	FALSE	FALSE	FALSE	0.19	0.35	0.01	0.029	0.26	0.1	0.56	0.2	0.5
fat	I	FBgn0032264	Lip4	34450	25.04	2149.78	0.013	0.00017	0.044	0.0047	0.66	1.1	FALSE	FALSE	FALSE	FALSE	0.39	0.57	0.15	0.24	0.36	0.45	0.97	0.032	0.27
fat	I	FBgn0027611	LManII	34437	33.49	11040.1	0.002	0.0019	0.011	0.031	0.28	0.63	FALSE	FALSE	FALSE	FALSE	0.033	0.11	2.2e-06	3.9e-05	0.53	0.21	0.74	0.017	0.22
fat	I	FBgn0010591	Sply	46059	33.4	3779.3	1.3e-05	0.06	0.0002	0.3	0.39	0.46	FALSE	FALSE	TRUE	FALSE	0.91	0.95	9.9e-06	0.00012	0.4	0.0012	0.13	0.16	0.45
fat	I	FBgn0004363	porin	34500	35.76	8161.88	0.0019	0.0023	0.0099	0.035	0.26	0.4	FALSE	FALSE	TRUE	FALSE	0.057	0.16	0.45	0.56	0.054	0.087	0.52	0.022	0.25
fat	I	FBgn0032160	CG4598	34315	32.28	1935.56	2.5e-05	0.051	0.00032	0.27	0.57	0.42	FALSE	FALSE	FALSE	FALSE	0.013	0.055	0.099	0.18	0.17	0.64	1	0.11	0.39
fat	I	FBgn0038422	CG14880	41986	23.96	64.21	5.8e-05	0.033	0.00062	0.21	3.3	0.55	FALSE	FALSE	FALSE	FALSE	0.0083	0.041	0.31	0.43	0.65	0.99	1	0.028	0.26
fat	I	FBgn0035978	UGP	39065	36.14	21718.9	1.4e-05	0.07	0.00021	0.32	0.31	0.41	FALSE	FALSE	FALSE	FALSE	8.4e-06	0.00029	2.6e-11	6.1e-09	0.77	0.93	1	0.0067	0.15
fat	I	FBgn0026380	Prosbeta3	41079	31.78	2434.39	1.7e-06	0.16	3.8e-05	0.47	0.72	0.23	FALSE	FALSE	FALSE	FALSE	0.00017	0.0025	0.77	0.83	0.031	0.99	1	0.27	0.56
fat	I	FBgn0030558	CG1461	32381	23.32	4467.08	0.012	0.00037	0.043	0.0087	1	0.92	FALSE	FALSE	FALSE	FALSE	0.23	0.41	0.00027	0.0016	1.7	0.72	1	0.027	0.26
fat	I	FBgn0033451	CG1665	36014	30.08	827.9	0.0003	0.015	0.0024	0.12	0.45	0.52	FALSE	FALSE	FALSE	FALSE	0.0018	0.014	1.8e-08	9.2e-07	0.97	0.89	1	0.35	0.63
fat	I	FBgn0032161	CG4594	34316	28.82	256.17	3.3e-06	0.14	6.6e-05	0.44	0.81	0.29	FALSE	FALSE	FALSE	FALSE	0.045	0.13	0.0021	0.008	0.44	0.57	1	0.42	0.68
fat	I	FBgn0029969	CG10932	31695	33.63	4055.57	2e-05	0.071	0.00028	0.33	0.35	0.39	FALSE	FALSE	TRUE	FALSE	0.4	0.57	1.8e-06	3.5e-05	0.42	0.003	0.15	0.52	0.75
fat	I	FBgn0086450	su(r)	31858	33.71	4828.86	4.7e-07	0.27	1.4e-05	0.59	0.62	0.33	FALSE	FALSE	TRUE	FALSE	0.69	0.81	1.7e-07	5.6e-06	0.67	0.0095	0.21	0.15	0.44
fat	I	FBgn0039737	CG7920	43562	36.31	14160.1	0.0028	0.0029	0.014	0.042	0.28	0.69	FALSE	FALSE	FALSE	TRUE	0.066	0.17	0.49	0.61	0.056	0.16	0.67	0.0031	0.097
fat	I	FBgn0003231	ref(2)P	35246	29.75	9375.8	5.6e-06	0.13	9.9e-05	0.43	0.6	0.27	FALSE	TRUE	FALSE	FALSE	5e-05	0.0011	0.28	0.39	-0.11	0.99	1	0.022	0.25
fat	I	FBgn0031717	Oscillin	33783	30.77	615.17	0.0026	0.0033	0.013	0.045	0.3	0.7	FALSE	FALSE	TRUE	FALSE	0.21	0.38	4.9e-05	0.00041	0.45	0.07	0.48	0.016	0.22
fat	I	FBgn0051472	sgll	40925	30.05	697.11	1.2e-05	0.099	0.00019	0.38	0.4	0.28	FALSE	FALSE	TRUE	FALSE	0.066	0.17	7.6e-08	2.9e-06	0.59	0.061	0.45	0.63	0.82
fat	I	FBgn0025286	RpL31	35988	32.62	19410.9	0.00043	0.015	0.0031	0.13	0.81	0.54	FALSE	FALSE	FALSE	FALSE	0.56	0.71	0.0028	0.01	0.65	0.25	0.81	0.032	0.27
fat	I	FBgn0053113	Rtnl1	33721	33	6199.08	1.5e-05	0.094	0.00022	0.37	0.47	0.3	FALSE	FALSE	TRUE	FALSE	0.11	0.25	1.8e-07	5.8e-06	0.66	0.096	0.55	0.16	0.45
fat	I	FBgn0039481	Cpr97Eb	43259	31.94	80.43	0.036	0.00012	0.094	0.0036	0.28	1.2	FALSE	FALSE	TRUE	FALSE	0.93	0.96	0.028	0.065	0.29	0.037	0.36	0.19	0.48
fat	I	FBgn0035714	CG8549	38749	29.41	564.37	0.0032	0.0034	0.015	0.046	0.32	0.51	FALSE	FALSE	TRUE	FALSE	0.39	0.56	0.0002	0.0013	0.43	0.053	0.42	0.3	0.58
fat	I	FBgn0030724	Nipsnap	32573	32.25	1231.49	0.022	0.00033	0.065	0.008	0.24	0.55	FALSE	FALSE	TRUE	TRUE	0.76	0.86	0.052	0.11	0.2	0.02	0.28	0.00069	0.04
fat	I	FBgn0031824	CG9547	33911	29.92	844.9	0.00061	0.014	0.0041	0.12	0.43	0.47	FALSE	FALSE	FALSE	FALSE	0.0057	0.031	0.78	0.84	-0.03	0.79	1	0.028	0.26
fat	I	FBgn0050042	Cpr49Ab	36345	35.54	11592.3	0.00096	0.011	0.0058	0.1	0.37	0.75	FALSE	FALSE	FALSE	FALSE	0.00023	0.0032	0.02	0.049	-0.24	0.97	1	0.041	0.29
fat	I	FBgn0035473	mge	38459	28.93	642.12	0.007	0.0016	0.028	0.027	0.37	0.53	FALSE	FALSE	FALSE	FALSE	0.086	0.21	0.64	0.73	0.058	0.44	0.97	0.058	0.32
fat	I	FBgn0035060	Eps-15	37961	28.3	1958.9	0.031	0.00022	0.084	0.0058	0.21	0.76	FALSE	FALSE	FALSE	FALSE	0.16	0.31	0.78	0.85	0.025	0.12	0.6	0.04	0.28
fat	I	FBgn0033162	Glo1	35656	31.37	1743.32	0.00045	0.02	0.0032	0.15	0.32	0.51	FALSE	FALSE	TRUE	FALSE	0.48	0.65	5.1e-05	0.00043	0.4	0.012	0.23	0.098	0.38
fat	I	FBgn0023175	Prosalpha7	36018	32.72	4380.07	1.3e-05	0.13	0.0002	0.42	0.49	0.25	FALSE	FALSE	FALSE	FALSE	0.047	0.14	0.0087	0.026	0.24	0.21	0.75	0.43	0.68
fat	I	FBgn0030612	CG5599	32441	31.34	992.77	7.5e-05	0.066	0.00076	0.31	0.29	0.46	FALSE	FALSE	FALSE	FALSE	0.0018	0.014	6.9e-09	4.5e-07	0.58	0.28	0.84	0.26	0.55
fat	I	FBgn0016687	Nurf-38	37922	34.87	7701.98	0.0055	0.0029	0.023	0.041	0.2	0.62	FALSE	FALSE	FALSE	FALSE	0.00096	0.0088	7.9e-08	3e-06	0.55	0.56	1	0.028	0.26
fat	I	FBgn0028737	eEF1beta	45249	33.69	13338.8	1.9e-05	0.12	0.00027	0.42	0.38	0.31	FALSE	FALSE	TRUE	FALSE	0.043	0.13	0.014	0.039	0.18	0.079	0.5	0.14	0.43
fat	I	FBgn0039849	CG11334	43713	33.17	1229.65	0.00052	0.023	0.0036	0.17	0.36	0.45	FALSE	FALSE	TRUE	FALSE	0.54	0.7	7.6e-05	0.00058	0.43	0.019	0.28	0.13	0.42
fat	I	FBgn0039790	CG2246	43637	29.82	759.54	2.7e-06	0.24	5.6e-05	0.56	0.51	0.14	FALSE	FALSE	TRUE	FALSE	0.72	0.84	7.3e-06	9.7e-05	0.47	0.0055	0.17	0.57	0.78
fat	I	FBgn0000412	D1	41095	27.58	645.27	3.2e-07	0.39	1.1e-05	0.68	1.6	0.28	FALSE	FALSE	FALSE	FALSE	0.035	0.11	0.00019	0.0012	0.97	0.86	1	0.61	0.8
fat	I	FBgn0050410	Rpi	246599	30.46	1624.56	0.0043	0.0044	0.019	0.056	0.38	0.59	FALSE	FALSE	FALSE	FALSE	0.38	0.56	0.059	0.12	0.23	0.12	0.61	0.41	0.67
fat	I	FBgn0003890	betaTub97EF	43359	33.72	4410.6	0.00023	0.041	0.0019	0.24	0.36	0.57	FALSE	FALSE	TRUE	FALSE	0.33	0.51	1.2e-05	0.00014	0.47	0.026	0.31	0.13	0.42
fat	I	FBgn0040985	CG6115	50459	27.28	627.5	0.011	0.0016	0.039	0.028	0.25	0.84	FALSE	FALSE	TRUE	TRUE	0.34	0.52	0.00055	0.0028	0.37	0.048	0.41	0.003	0.095
fat	I	FBgn0041150	hoe1	249663	25.08	1693.72	1.7e-06	0.29	3.8e-05	0.61	2.9	0.18	FALSE	TRUE	FALSE	FALSE	1.9e-05	0.00052	0.25	0.36	-0.48	1	1	0.23	0.52
fat	I	FBgn0051523	CG31523	326148	30.81	23291.2	0.0065	0.0034	0.026	0.047	0.39	0.72	FALSE	FALSE	FALSE	FALSE	0.0087	0.042	1.1e-06	2.3e-05	0.92	0.85	1	0.012	0.19
fat	I	FBgn0031479	Prx6005	33493	30.21	204.8	0.00015	0.057	0.0014	0.29	0.44	0.34	FALSE	FALSE	FALSE	FALSE	0.088	0.21	0.038	0.084	0.21	0.21	0.75	0.54	0.76
fat	I	FBgn0000448	Hr3	36073	24.19	0.33	6.7e-07	0.38	1.9e-05		2.7	0.16	FALSE	TRUE	FALSE	FALSE	4.6e-05	0.001	0.95	0.97	-0.023	1	1	0.92
fat	I	FBgn0051199	CG31199	42456	27.34	841.6	0.00054	0.031	0.0037	0.2	0.59	0.66	FALSE	FALSE	FALSE	FALSE	0.0018	0.014	0.35	0.46	-0.14	0.97	1	0.22	0.51
fat	I	FBgn0036316	CG10960	39458	31.49	14689.9	0.0053	0.005	0.022	0.062	0.37	0.54	FALSE	FALSE	FALSE	FALSE	0.44	0.61	0.00045	0.0024	0.5	0.11	0.57	0.0072	0.15
fat	I	FBgn0004167	kst	38418	33.58	13398.7	8.8e-07	0.36	2.4e-05	0.66	0.44	0.18	FALSE	FALSE	TRUE	FALSE	0.63	0.76	2.5e-07	7.5e-06	0.48	0.0012	0.13	0.49	0.72
fat	I	FBgn0014032	Sptr	31781	30.18	573.14	5.9e-05	0.11	0.00063	0.39	0.31	0.29	FALSE	FALSE	TRUE	FALSE	0.71	0.82	0.00019	0.0012	0.28	0.00097	0.13	0.58	0.79
fat	I	FBgn0038819	Cpr92F	42450	33.73	26.37	0.0034	0.0083	0.016	0.086	0.71	0.95	FALSE	FALSE	FALSE	FALSE	0.81	0.89	0.0016	0.0067	0.78	0.19	0.72	0.21	0.5
fat	I	FBgn0010516	wal	36252	35.58	8195.88	0.004	0.0076	0.018	0.081	0.2	0.65	FALSE	FALSE	FALSE	FALSE	0.012	0.053	1.1e-06	2.3e-05	0.45	0.14	0.65	0.034	0.27
fat	I	FBgn0030653	CG7860	32488	26.78	396.9	0.024	0.00097	0.071	0.019	0.64	1	FALSE	FALSE	FALSE	FALSE	0.0066	0.035	2.5e-06	4.3e-05	1.8	0.98	1	0.029	0.26
fat	I	FBgn0001208	Hn	38871	33.19	12281.6	0.0018	0.016	0.0098	0.13	0.24	0.64	FALSE	FALSE	FALSE	FALSE	1.9e-05	0.00053	8.2e-10	8.8e-08	0.79	0.98	1	0.048	0.3
fat	I	FBgn0051639	CG31639	39102	31.14	0.09	1.3e-06	0.37	3.2e-05		0.55	0.11	FALSE	FALSE	TRUE	FALSE	0.11	0.25	0.00014	0.00096	0.37	0.076	0.49	0.6
fat	I	FBgn0015790	Rab11	42501	31.47	2500.68	0.0011	0.025	0.0065	0.17	0.24	0.38	FALSE	FALSE	TRUE	FALSE	0.23	0.4	0.049	0.1	0.13	0.0076	0.19	0.06	0.33
fat	I	FBgn0036932	CG14184	40193	27.51	373.22	0.00066	0.035	0.0043	0.22	0.45	0.46	FALSE	FALSE	FALSE	FALSE	0.028	0.098	6.9e-07	1.7e-05	0.82	0.57	1	0.11	0.4
fat	I	FBgn0037063	CG9391	40346	31.6	1509.64	0.00067	0.037	0.0044	0.22	0.37	0.43	FALSE	FALSE	FALSE	FALSE	0.008	0.04	1.6e-07	5.4e-06	0.74	0.61	1	0.64	0.83
fat	I	FBgn0265784	CrebB	32817	24.68	1207.31	0.0056	0.0075	0.023	0.081	1.6	0.41	FALSE	FALSE	FALSE	FALSE	0.078	0.19	0.62	0.71	0.25	0.91	1	0.004	0.11
fat	I	FBgn0034432	CG7461	37217	35.43	9225.4	2.5e-05	0.19	0.00032	0.51	0.33	0.31	FALSE	FALSE	TRUE	FALSE	0.3	0.48	0.00061	0.003	0.24	0.0029	0.15	0.08	0.35
fat	I	FBgn0261524	lic	32257	28.83	387.43	8.2e-06	0.26	0.00014	0.59	0.46	0.28	FALSE	FALSE	TRUE	FALSE	0.37	0.54	0.00012	0.00086	0.36	0.016	0.26	0.65	0.83
fat	I	FBgn0035147	Gale	38076	33.01	5383.03	0.0018	0.023	0.0097	0.17	0.24	0.61	FALSE	FALSE	FALSE	FALSE	1.6e-05	0.00047	7e-10	7.8e-08	0.77	0.98	1	0.07	0.34
fat	I	FBgn0261436	DhpD	40528	32.12	866.74	0.023	0.002	0.068	0.031	0.24	0.79	FALSE	FALSE	FALSE	FALSE	0.0074	0.038	2.7e-06	4.5e-05	0.65	0.7	1	0.061	0.33
fat	I	FBgn0086904	Nacalpha	36409	32.5	12013.4	0.0062	0.0087	0.025	0.089	0.34	0.54	FALSE	FALSE	FALSE	FALSE	0.35	0.52	0.1	0.18	0.19	0.11	0.59	0.11	0.4
fat	I	FBgn0034248	CG14483	36995	24.38	737.64	0.00044	0.066	0.0032	0.31	1.9	0.42	FALSE	FALSE	FALSE	FALSE	0.2	0.36	0.027	0.063	1.1	0.78	1	0.21	0.5
fat	I	FBgn0000318	cl	43938	31.47	981.89	0.0033	0.018	0.016	0.14	0.36	0.43	FALSE	FALSE	FALSE	FALSE	0.12	0.26	2.2e-05	0.00022	0.61	0.28	0.84	0.4	0.67
fat	I	FBgn0003274	RpLP2	36855	33.42	39932	6.1e-05	0.17	0.00064	0.49	0.6	0.3	FALSE	FALSE	FALSE	FALSE	0.0016	0.013	0.98	0.99	-0.0027	0.94	1	0.089	0.37
fat	I	FBgn0263121	Prosalpha1	246582	32.79	3206.36	0.00088	0.047	0.0054	0.26	0.29	0.32	FALSE	FALSE	TRUE	FALSE	0.87	0.92	0.0015	0.0062	0.27	0.0026	0.14	0.079	0.35
fat	I	FBgn0033179	p47	35674	30.8	2539.7	0.00057	0.061	0.0039	0.3	0.32	0.43	FALSE	FALSE	TRUE	FALSE	0.58	0.73	0.0001	0.00073	0.38	0.0099	0.21	0.44	0.69
fat	I	FBgn0042175	CG18858	326109	31.72	2559.14	0.002	0.029	0.01	0.19	0.47	0.48	FALSE	TRUE	FALSE	FALSE	5.3e-06	0.00021	3.7e-05	0.00034	-0.71	1	1	0.01	0.18
fat	I	FBgn0032509	CG6523	34745	31.6	1235.84	0.0054	0.013	0.023	0.11	0.2	0.46	FALSE	FALSE	TRUE	FALSE	0.16	0.31	5.9e-05	0.00047	0.32	0.013	0.24	0.064	0.33
fat	I	FBgn0086656	shrb	35933	30.55	1015.1	0.0029	0.024	0.014	0.17	0.49	0.52	FALSE	FALSE	FALSE	FALSE	0.24	0.41	6.9e-05	0.00054	0.74	0.32	0.88	0.022	0.25
fat	I	FBgn0031092	CG9577	33016	33.93	981.07	0.00024	0.12	0.0019	0.41	0.29	0.34	FALSE	FALSE	FALSE	FALSE	0.002	0.015	0.6	0.69	-0.034	0.44	0.97	0.31	0.59
fat	I	FBgn0051548	CG31548	318794	32.4	1502.77	0.0074	0.012	0.029	0.11	0.21	0.59	FALSE	FALSE	TRUE	FALSE	0.09	0.21	3e-05	0.00028	0.39	0.056	0.43	0.08	0.35
fat	I	FBgn0037643	skap	41067	35.07	17003	0.0015	0.045	0.0082	0.25	0.3	0.5	FALSE	FALSE	FALSE	FALSE	0.0039	0.025	1.3e-07	4.6e-06	0.66	0.6	1	0.013	0.2
fat	I	FBgn0027580	PCB	36020	37.39	24019.1	0.00015	0.15	0.0013	0.46	0.28	0.37	FALSE	FALSE	TRUE	FALSE	0.43	0.6	1.4e-05	0.00015	0.35	0.0021	0.14	0.2	0.49
fat	I	FBgn0034902	CG5532	37761	27.13	722.82	0.018	0.006	0.057	0.07	1	0.66	FALSE	FALSE	FALSE	FALSE	0.056	0.15	0.78	0.84	-0.12	0.92	1	0.051	0.31
fat	I	FBgn0000109	Aprt	48224	30.65	325.06	0.039	0.0024	0.1	0.036	0.27	0.49	FALSE	FALSE	FALSE	FALSE	0.045	0.13	5.5e-05	0.00045	0.63	0.55	1	0.07	0.34
fat	I	FBgn0028992	sds22	42091	29.23	364.56	0.0015	0.055	0.0082	0.28	0.49	0.42	FALSE	FALSE	FALSE	FALSE	0.56	0.71	0.0092	0.027	0.38	0.12	0.59	0.41	0.67
fat	I	FBgn0033005	CG3107	35475	29.82	735.3	8e-06	0.4	0.00014	0.69	0.42	0.27	FALSE	FALSE	FALSE	FALSE	0.0047	0.028	0.12	0.2	0.11	0.37	0.92	0.74	0.88
fat	I	FBgn0028479	Mtpalpha	34276	36.46	15759.6	5.3e-05	0.25	0.00058	0.57	0.28	0.27	FALSE	FALSE	TRUE	FALSE	0.23	0.41	1.6e-06	3.2e-05	0.37	0.0019	0.13	0.34	0.62
fat	I	FBgn0028530	mTTF	34837	26.21	191.32	0.00091	0.077	0.0056	0.34	0.72	0.28	FALSE	FALSE	FALSE	FALSE	0.0031	0.021	0.4	0.52	-0.15	0.97	1	0.6	0.8
fat	I	FBgn0003885	alphaTub84D	40904	35.52	599.38	1.2e-05	0.38	0.00019	0.67	0.42	0.16	FALSE	FALSE	TRUE	FALSE	0.24	0.41	0.00048	0.0025	0.3	0.021	0.28	0.94	0.97
fat	I	FBgn0033875	CG6357	36532	27	1894.51	0.0053	0.026	0.022	0.18	0.44	0.65	FALSE	FALSE	FALSE	FALSE	0.11	0.25	3.3e-05	0.0003	0.77	0.47	0.99	0.042	0.29
fat	I	FBgn0262468	vib	42306	31.89	1050.13	0.0069	0.021	0.028	0.16	0.18	0.52	FALSE	FALSE	TRUE	FALSE	0.03	0.1	5.7e-06	7.9e-05	0.37	0.048	0.41	0.017	0.22
fat	I	FBgn0035379	spz5	38350	23.63	22.84	0.015	0.01	0.05	0.099	0.92	0.83	FALSE	FALSE	FALSE	FALSE	0.14	0.29	0.62	0.71	0.17	0.79	1	0.083	0.36
fat	I	FBgn0037684	CG8129	41117	30.82	11177.2	0.0062	0.024	0.025	0.17	0.29	0.62	FALSE	FALSE	FALSE	FALSE	4e-08	9.6e-06	5.8e-12	2.8e-09	1.5	1	1	0.14	0.43
fat	I	FBgn0266599	Hsc70-4	41840	36.02	79572.5	0.023	0.007	0.069	0.077	0.13	0.46	FALSE	FALSE	TRUE	FALSE	0.066	0.17	5.8e-05	0.00046	0.27	0.0077	0.19	0.06	0.33
fat	I	FBgn0266268	FeCH	43757	32.48	1529.6	0.00015	0.2	0.0014	0.53	0.35	0.28	FALSE	FALSE	FALSE	FALSE	0.056	0.15	0.074	0.14	0.14	0.11	0.58	0.66	0.84
fat	I	FBgn0029174	FKBP59	47762	32.43	4097.23	0.0054	0.032	0.023	0.2	0.23	0.3	FALSE	FALSE	TRUE	FALSE	0.65	0.78	0.022	0.054	0.18	0.0053	0.17	0.47	0.71
fat	I	FBgn0037351	RpL13A	40687	32.96	37643.3	0.00025	0.18	0.002	0.51	0.39	0.35	FALSE	FALSE	FALSE	FALSE	0.1	0.23	0.046	0.098	0.19	0.15	0.66	0.18	0.48
fat	I	FBgn0067783	DPCoAC	42429	29.81	704.39	3e-05	0.36	0.00037	0.66	0.47	0.18	FALSE	FALSE	TRUE	FALSE	0.22	0.4	0.0014	0.0059	0.32	0.068	0.47	0.26	0.55
fat	I	FBgn0030593	CG9512	32419	33.37	9377.81	0.031	0.0065	0.086	0.074	0.31	0.75	FALSE	FALSE	FALSE	FALSE	0.37	0.54	0.0019	0.0075	0.48	0.19	0.72	0.61	0.8
fat	I	FBgn0039726	eIF2Balpha	43549	27.93	416.84	0.00024	0.2	0.0019	0.52	0.65	0.25	FALSE	FALSE	FALSE	FALSE	0.0048	0.028	0.97	0.98	0.0053	0.93	1	0.91	0.96
fat	I	FBgn0261995	CG42813	43276	31.31	1725.68	0.0094	0.024	0.034	0.17	0.26	0.52	FALSE	FALSE	FALSE	FALSE	0.038	0.12	1e-05	0.00013	0.53	0.31	0.87	0.12	0.41
fat	I	FBgn0030160	CG9691	31923	27.41	7318.45	0.025	0.0089	0.072	0.091	0.5	0.79	FALSE	FALSE	FALSE	FALSE	0.53	0.69	0.0036	0.013	0.68	0.29	0.85	0.013	0.2
fat	I	FBgn0016726	RpL29	37430	28.26	14429.1	0.00065	0.13	0.0043	0.44	1.6	0.32	FALSE	FALSE	FALSE	FALSE	0.59	0.74	0.0036	0.013	1.3	0.47	0.99	0.085	0.36
fat	I	FBgn0010590	Prosbeta1	46058	31.87	2173.5	0.00036	0.17	0.0027	0.49	0.46	0.21	FALSE	TRUE	FALSE	FALSE	5.2e-05	0.0011	0.0063	0.02	-0.32	1	1	0.36	0.64
fat	I	FBgn0000556	eEF1alpha1	36271	36.79	199239	0.00074	0.13	0.0047	0.42	0.26	0.29	FALSE	FALSE	TRUE	FALSE	0.46	0.63	7.4e-05	0.00057	0.33	0.0038	0.16	0.015	0.21
fat	I	FBgn0041191	Rheb	117332	28.77	975.44	0.0086	0.026	0.032	0.18	0.39	0.41	FALSE	FALSE	FALSE	FALSE	0.34	0.52	0.13	0.22	0.21	0.21	0.75	0.0091	0.17
fat	I	FBgn0038129	TBC1D5	41628	26.18	2031.69	0.027	0.0081	0.077	0.085	0.33	0.74	FALSE	FALSE	FALSE	FALSE	0.041	0.13	3.3e-05	0.0003	0.75	0.67	1	0.18	0.48
fat	I	FBgn0033225	TTLL12	35732	27.91	686.11	0.00099	0.11	0.0059	0.4	0.51	0.32	FALSE	FALSE	FALSE	FALSE	0.076	0.19	0.22	0.33	0.16	0.51	1	0.53	0.75
fat	I	FBgn0031713	CG7277	33777	27.24	770.05	0.00022	0.22	0.0018	0.54	0.76	0.25	FALSE	TRUE	FALSE	FALSE	0.00036	0.0042	0.13	0.21	-0.26	1	1	0.94	0.97
fat	I	FBgn0062442	Cisd2	43459	32.08	1288.94	0.028	0.0092	0.078	0.092	0.23	0.58	FALSE	FALSE	TRUE	FALSE	0.71	0.83	0.009	0.027	0.28	0.025	0.31	0.037	0.28
fat	I	FBgn0010422	TfIIS	34883	26.52	229.52	0.00013	0.27	0.0012	0.59	0.9	0.29	FALSE	FALSE	FALSE	FALSE	0.034	0.11	0.12	0.21	0.3	0.83	1	0.77	0.89
fat	I	FBgn0033431	CG1827	35989	25.11	1028.47	0.037	0.0071	0.097	0.078	0.28	0.72	FALSE	FALSE	FALSE	FALSE	7.4e-05	0.0014	2.3e-08	1.1e-06	1.2	1	1	0.16	0.45
fat	I	FBgn0015614	CanB2	46456	29.29	1387.31	0.0075	0.036	0.029	0.22	0.31	0.44	FALSE	FALSE	FALSE	FALSE	0.059	0.16	0.87	0.91	0.017	0.36	0.91	0.15	0.44
fat	I	FBgn0034717	CG5819	37547	28.98	3277.31	2.5e-05	0.44	0.00033	0.71	0.56	0.19	FALSE	FALSE	TRUE	FALSE	0.98	0.99	2.4e-05	0.00023	0.57	0.014	0.25	0.18	0.48
fat	I	FBgn0038742	Arc42	42364	32.28	2561.13	0.00021	0.25	0.0018	0.58	0.42	0.27	FALSE	FALSE	FALSE	FALSE	0.052	0.15	0.11	0.19	0.15	0.28	0.84	0.27	0.56
fat	I	FBgn0020238	14-3-3epsilon	42186	34.69	4282.09	5.3e-05	0.38	0.00057	0.67	0.31	0.15	FALSE	FALSE	TRUE	FALSE	0.02	0.075	0.11	0.2	0.098	0.067	0.47	0.26	0.56
fat	I	FBgn0030520	Pdcd4	32337	28.52	1684.43	0.00082	0.15	0.0052	0.46	0.55	0.29	FALSE	FALSE	FALSE	FALSE	0.0053	0.03	0.65	0.74	-0.064	0.91	1	0.1	0.39
fat	I	FBgn0037801	CG3999	41253	33.69	3456.95	0.00076	0.16	0.0048	0.47	0.23	0.37	FALSE	FALSE	FALSE	FALSE	1.6e-07	2.2e-05	7.2e-12	3.1e-09	0.88	1	1	0.37	0.64
fat	I	FBgn0011296	l(2)efl	37744	32.87	745.24	0.0041	0.062	0.018	0.3	0.23	0.57	FALSE	FALSE	FALSE	FALSE	0.017	0.068	1.7e-06	3.3e-05	0.49	0.21	0.75	0.48	0.72
fat	I	FBgn0025615	Torsin	31399	28.45	1037.42	0.0097	0.033	0.035	0.21	0.29	0.33	FALSE	FALSE	FALSE	FALSE	0.16	0.32	0.41	0.53	0.084	0.18	0.71	0.72	0.87
fat	I	FBgn0037440	CRAT	40787	31.06	681.18	0.025	0.014	0.072	0.12	0.18	0.34	FALSE	FALSE	TRUE	FALSE	0.5	0.66	0.16	0.26	0.11	0.011	0.22	0.024	0.25
fat	I	FBgn0042094	Adk3	41318	30.38	506.15	0.00017	0.29	0.0015	0.61	0.49	0.22	FALSE	FALSE	TRUE	FALSE	0.93	0.96	0.00022	0.0014	0.47	0.018	0.28	0.41	0.67
fat	I	FBgn0036110	Cpr67Fb	39225	24.07	1.83	0.011	0.032	0.039		1.1	0.76	FALSE	FALSE	FALSE	FALSE	0.66	0.78	0.042	0.09	0.86	0.44	0.97	0.19
fat	I	FBgn0052068	Adi1	326189	32.61	2926.28	0.023	0.017	0.068	0.14	0.15	0.59	FALSE	FALSE	FALSE	FALSE	6.8e-06	0.00025	1.5e-09	1.4e-07	0.7	0.99	1	0.05	0.3
fat	I	FBgn0033883	CG16935	36540	32.53	915.53	0.00053	0.2	0.0036	0.52	0.31	0.32	FALSE	FALSE	TRUE	FALSE	0.71	0.83	0.0017	0.0069	0.27	0.0051	0.17	0.46	0.71
fat	I	FBgn0086370	sra	47384	26.79	839.44	0.02	0.019	0.062	0.15	0.65	0.51	FALSE	FALSE	FALSE	FALSE	0.71	0.83	0.058	0.12	0.52	0.29	0.85	0.11	0.39
fat	I	FBgn0027932	Akap200	34170	32.39	6320.68	6e-05	0.4	0.00064	0.69	0.61	0.17	FALSE	FALSE	TRUE	FALSE	0.9	0.94	4.2e-05	0.00037	0.63	0.035	0.35	0.16	0.45
fat	I	FBgn0039043	CG17121	42721	29.13	364.31	0.0087	0.043	0.032	0.24	0.28	0.53	FALSE	FALSE	FALSE	FALSE	0.0013	0.011	0.024	0.058	-0.23	0.89	1	0.2	0.49
fat	I	FBgn0262717	Skeletor	3772559	28.88	51.34	2.3e-05	0.51	0.00031	0.76	0.89	0.23	FALSE	FALSE	FALSE	FALSE	0.29	0.47	0.00062	0.0031	0.65	0.33	0.89	0.28	0.57
fat	I	FBgn0020235	ATPsyngamma	43507	34.9	5353.72	0.0025	0.11	0.012	0.4	0.21	0.36	FALSE	FALSE	TRUE	FALSE	0.22	0.39	0.1	0.18	0.1	0.0053	0.17	0.15	0.44
fat	I	FBgn0032453	CG6180	34683	32.76	1979.22	0.00063	0.22	0.0042	0.54	0.46	0.19	FALSE	FALSE	FALSE	FALSE	0.33	0.51	3e-05	0.00028	0.62	0.13	0.63	0.93	0.97
fat	I	FBgn0014010	Rab5	33418	30.61	2481.93	0.0089	0.051	0.033	0.27	0.24	0.32	FALSE	FALSE	FALSE	FALSE	0.007	0.037	0.19	0.29	-0.11	0.55	1	0.018	0.23
fat	I	FBgn0020018	Ppox	42939	28.8	558.4	0.00052	0.24	0.0036	0.56	0.44	0.22	FALSE	FALSE	FALSE	FALSE	0.0072	0.037	0.95	0.96	-0.0069	0.77	1	0.78	0.89
fat	I	FBgn0037648	CG11975	41074	26.45	470.27	3.4e-05	0.5	0.00041	0.76	0.94	0.14	FALSE	FALSE	FALSE	FALSE	0.12	0.26	0.0052	0.017	0.54	0.59	1	0.21	0.51
fat	I	FBgn0012034	AcCoAS	40348	35.42	58854.4	0.00053	0.24	0.0037	0.57	0.36	0.33	FALSE	FALSE	FALSE	FALSE	0.063	0.17	1.7e-06	3.2e-05	0.59	0.2	0.74	0.38	0.65
fat	I	FBgn0032782	Rab9	35221	27.54	1690.4	3.6e-05	0.5	0.00044	0.75	0.62	0.18	FALSE	FALSE	TRUE	FALSE	0.74	0.85	1.4e-05	0.00015	0.67	0.045	0.39	0.12	0.41
fat	I	FBgn0035334	CG8993	38301	31.28	696.36	0.014	0.042	0.048	0.24	0.31	0.51	FALSE	FALSE	FALSE	FALSE	0.0011	0.0094	0.012	0.033	-0.32	0.95	1	0.09	0.37
fat	I	FBgn0031068	Alr	32991	25.61	140.19	0.00085	0.22	0.0053	0.55	1.2	0.31	FALSE	FALSE	FALSE	FALSE	0.042	0.13	0.37	0.49	0.26	0.9	1	0.98	0.99
fat	I	FBgn0032596	Prosbeta4	34999	31.26	2119.68	0.0067	0.077	0.027	0.34	0.28	0.24	FALSE	FALSE	TRUE	FALSE	0.35	0.53	0.1	0.18	0.15	0.05	0.41	0.22	0.52
fat	I	FBgn0034345	CG5174	37117	30.59	1568.55	0.0003	0.32	0.0023	0.64	0.41	0.15	FALSE	FALSE	FALSE	FALSE	0.039	0.12	0.2	0.31	0.12	0.34	0.9	0.19	0.48
fat	I	FBgn0015806	S6k	38654	29.11	2753.69	9.8e-08	0.91	4.8e-06	0.96	1.1	0.024	FALSE	FALSE	FALSE	FALSE	0.066	0.17	1.6e-05	0.00017	0.74	0.52	1	0.4	0.66
fat	I	FBgn0015797	Rab6	34636	29.77	786.02	0.011	0.058	0.038	0.29	0.23	0.24	FALSE	FALSE	FALSE	FALSE	0.1	0.23	0.67	0.76	0.034	0.1	0.56	0.13	0.42
fat	I	FBgn0039713	RpS8	43532	34.02	40972.8	0.0018	0.17	0.0096	0.49	0.29	0.3	FALSE	FALSE	TRUE	FALSE	0.43	0.61	0.021	0.051	0.2	0.018	0.28	0.089	0.37
fat	I	FBgn0052694	CG32694	31933	28.87	99.74	0.00059	0.27	0.004	0.59	0.47	0.27	FALSE	FALSE	FALSE	FALSE	0.0064	0.034	0.84	0.89	-0.022	0.82	1	0.15	0.44
fat	I	FBgn0031737	obst-E	33806	25.88	573.56	0.024	0.031	0.07	0.2	1.9	0.61	FALSE	FALSE	FALSE	FALSE	0.015	0.061	0.2	0.3	-1	0.99	1	0.01	0.18
fat	I	FBgn0030052	CG12065	31798	28.81	762.43	0.0041	0.12	0.018	0.41	0.24	0.25	FALSE	FALSE	TRUE	FALSE	0.57	0.72	0.024	0.058	0.18	0.0075	0.19	0.54	0.76
fat	I	FBgn0036334	CG11267	39476	33.34	648.77	0.0099	0.067	0.036	0.32	0.29	0.34	FALSE	FALSE	FALSE	FALSE	0.3	0.48	0.19	0.29	0.14	0.1	0.57	0.94	0.97
fat	I	FBgn0001215	Hrb98DE	43385	28.71	1388.24	0.00017	0.41	0.0015	0.7	0.48	0.097	FALSE	FALSE	FALSE	FALSE	0.014	0.058	0.39	0.51	0.088	0.63	1	0.1	0.39
fat	I	FBgn0040773	COX7C	50246	26.93	2925.92	0.00051	0.3	0.0036	0.62	2.2	0.24	FALSE	TRUE	FALSE	FALSE	0.00012	0.002	0.014	0.038	-1.4	1	1	0.11	0.39
fat	I	FBgn0034191	CG6984	36926	29.01	183.03	0.0027	0.16	0.013	0.47	0.35	0.27	FALSE	FALSE	TRUE	FALSE	0.31	0.49	0.0001	0.00074	0.5	0.094	0.54	0.85	0.93
fat	I	FBgn0038349	AOX3	41896	31.92	4531.68	4.6e-06	0.74	8.5e-05	0.89	0.38	0.067	FALSE	FALSE	TRUE	FALSE	0.025	0.089	1.2e-08	6.6e-07	0.58	0.055	0.43	0.97	0.99
fat	I	FBgn0033663	ERp60	36270	33.29	6113.26	0.0018	0.19	0.0096	0.52	0.22	0.23	FALSE	FALSE	FALSE	FALSE	0.0018	0.014	0.15	0.24	-0.089	0.34	0.9	0.7	0.86
fat	I	FBgn0037709	CG8199	41149	30.43	1181.74	0.0027	0.16	0.014	0.47	0.3	0.21	FALSE	FALSE	TRUE	FALSE	0.17	0.33	3.5e-05	0.00032	0.47	0.094	0.54	0.39	0.66
fat	I	FBgn0021979	l(2)k09913	37661	30.8	2473.39	0.0043	0.13	0.019	0.43	0.32	0.34	FALSE	FALSE	TRUE	FALSE	1	1	0.0043	0.014	0.32	0.012	0.23	0.43	0.68
fat	I	FBgn0039970	CG17508	49893	27.18	3374.67	0.0046	0.12	0.02	0.42	0.39	0.43	FALSE	FALSE	FALSE	FALSE	0.0022	0.016	0.086	0.16	-0.22	0.94	1	0.034	0.27
fat	I	FBgn0033021	CG10417	35492	27.16	669.22	0.0007	0.35	0.0045	0.66	0.69	0.33	FALSE	FALSE	FALSE	FALSE	0.29	0.46	0.02	0.051	0.43	0.37	0.92	0.63	0.82
fat	I	FBgn0029975	spidey	31703	33.12	14121.7	0.012	0.093	0.042	0.37	0.2	0.46	FALSE	FALSE	TRUE	FALSE	0.95	0.97	0.015	0.039	0.2	0.0021	0.14	0.47	0.72
fat	I	FBgn0011573	Cdc37	38232	29.54	956.24	0.00039	0.42	0.0029	0.7	0.54	0.14	FALSE	FALSE	FALSE	FALSE	0.011	0.049	0.73	0.81	0.044	0.81	1	0.95	0.98
fat	I	FBgn0086134	Prosalpha2	41531	32.44	3287.9	0.0087	0.12	0.033	0.41	0.25	0.3	FALSE	FALSE	TRUE	FALSE	0.96	0.98	0.01	0.029	0.24	0.0054	0.17	0.63	0.82
fat	I	FBgn0037146	CG7470	40443	36.27	20140.3	0.00037	0.42	0.0028	0.7	0.2	0.25	FALSE	FALSE	TRUE	FALSE	0.14	0.29	3.9e-06	5.9e-05	0.3	0.00075	0.13	0.25	0.54
fat	I	FBgn0037011	CG4858	40282	27.58	822.83	0.016	0.077	0.053	0.34	0.44	0.42	FALSE	FALSE	FALSE	FALSE	0.039	0.12	0.62	0.71	-0.083	0.77	1	0.1	0.39
fat	I	FBgn0031453	Bacc	33462	29.25	2726.42	0.0049	0.17	0.021	0.49	1.7	0.33	FALSE	FALSE	FALSE	FALSE	0.11	0.24	0.42	0.54	0.43	0.88	1	0.027	0.26
fat	I	FBgn0030478	CG1640	32292	34.73	6129.85	0.028	0.053	0.079	0.28	0.14	0.4	FALSE	FALSE	TRUE	FALSE	0.55	0.71	0.14	0.23	0.09	0.0013	0.13	0.052	0.31
fat	I	FBgn0053056	CG33056	326246	27.83	2.3	0.0019	0.27	0.0099		0.46	0.41	FALSE	FALSE	FALSE	FALSE	0.046	0.14	0.55	0.65	0.078	0.59	1	0.46
fat	I	FBgn0023537	CG17896	30995	33.68	6675.73	0.03	0.051	0.083	0.27	0.17	0.41	FALSE	FALSE	TRUE	FALSE	0.12	0.26	0.0002	0.0013	0.33	0.045	0.39	0.51	0.74
fat	I	FBgn0015521	RpS21	33487	31.39	9386.34	0.025	0.06	0.072	0.3	0.36	0.38	FALSE	FALSE	FALSE	FALSE	0.69	0.81	0.0075	0.023	0.45	0.12	0.6	0.078	0.35
fat	I	FBgn0035830	CG8209	38888	31.03	794.29	0.015	0.093	0.048	0.37	0.23	0.33	FALSE	FALSE	FALSE	FALSE	0.063	0.17	3.3e-05	0.00031	0.47	0.2	0.74	0.19	0.48
fat	I	FBgn0029996	UbcE2H	31728	28.88	1346.76	0.0026	0.25	0.013	0.58	0.52	0.31	FALSE	FALSE	FALSE	FALSE	0.0019	0.015	9.3e-08	3.4e-06	1.3	0.97	1	0.15	0.44
fat	I	FBgn0038080	CG12279	41570	30.3	257.01	0.033	0.051	0.09	0.27	0.26	0.37	FALSE	FALSE	FALSE	FALSE	0.039	0.12	3.8e-05	0.00034	0.63	0.55	1	0.27	0.56
fat	I	FBgn0036643	Syx8	39847	27.44	623.78	0.014	0.11	0.047	0.39	0.26	0.42	FALSE	FALSE	FALSE	FALSE	0.0051	0.029	0.09	0.17	-0.17	0.74	1	0.12	0.42
fat	I	FBgn0031437	Arpc5	33444	27.25	418.78	0.024	0.07	0.071	0.33	0.73	0.26	FALSE	FALSE	FALSE	FALSE	0.12	0.26	0.86	0.91	0.051	0.78	1	0.85	0.93
fat	I	FBgn0012036	Aldh	34256	36.84	30529.7	0.0051	0.2	0.022	0.52	0.27	0.34	FALSE	FALSE	TRUE	FALSE	0.84	0.9	0.0097	0.028	0.25	0.009	0.21	0.14	0.43
fat	I	FBgn0035438	PHGPx	38413	33.38	4862.23	0.034	0.056	0.091	0.29	0.14	0.46	FALSE	FALSE	FALSE	FALSE	3.5e-06	0.00015	1e-09	1e-07	0.72	0.99	1	0.15	0.44
fat	I	FBgn0035091	CG3829	38000	27.45	4749.63	0.038	0.05	0.099	0.27	0.3	0.49	FALSE	FALSE	FALSE	FALSE	0.077	0.19	0.00012	0.00085	0.66	0.54	1	0.038	0.28
fat	I	FBgn0025117	und	34294	30.43	3730.59	0.022	0.082	0.066	0.35	0.2	0.29	FALSE	FALSE	FALSE	FALSE	0.07	0.18	0.83	0.88	-0.017	0.15	0.66	0.73	0.87
fat	I	FBgn0039008	CG6972	42684	24.03	77.78	0.0019	0.31	0.0099	0.63	2	0.26	FALSE	FALSE	FALSE	FALSE	0.63	0.77	0.0083	0.025	1.7	0.52	1	0.7	0.86
fat	I	FBgn0038013	CG10038	41495	29.57	216.37	0.031	0.063	0.085	0.31	0.27	0.33	FALSE	FALSE	FALSE	FALSE	0.32	0.5	0.0014	0.006	0.44	0.15	0.66	0.69	0.85
fat	I	FBgn0039305	CG11858	43044	26.95	276.15	0.038	0.055	0.098	0.28	0.44	0.32	FALSE	FALSE	FALSE	FALSE	0.0099	0.046	6.3e-06	8.6e-05	1.2	0.94	1	0.49	0.72
fat	I	FBgn0022893	Df31	35418	29.15	2107.83	2.3e-07	0.95	8.5e-06	0.98	2.1	0.023	FALSE	TRUE	FALSE	FALSE	2.3e-06	0.00012	0.14	0.23	-0.41	1	1	0.16	0.45
fat	I	FBgn0038196	CG9922	41708	27.63	343.39	0.0039	0.24	0.018	0.57	0.51	0.28	FALSE	TRUE	FALSE	FALSE	0.00029	0.0037	0.0071	0.022	-0.46	1	1	0.55	0.76
fat	I	FBgn0030451	CG15717	32262	30.2	0.09	0.0013	0.37	0.0074		0.24	0.11	FALSE	FALSE	FALSE	FALSE	9.5e-07	7e-05	4.6e-11	8.4e-09	0.9	1	1	0.6
fat	I	FBgn0031478	CG8814	33492	28.31	2983.8	0.01	0.15	0.037	0.46	0.32	0.35	FALSE	FALSE	FALSE	FALSE	0.022	0.081	0.5	0.61	-0.078	0.65	1	0.13	0.42
fat	I	FBgn0030087	CG7766	31839	31.09	6085.08	9.7e-05	0.66	0.00095	0.85	0.48	0.1	FALSE	FALSE	TRUE	FALSE	0.26	0.43	3.4e-06	5.3e-05	0.64	0.099	0.56	0.84	0.93
fat	I	FBgn0002645	Map205	43765	32.73	4157.97	3.6e-07	0.95	1.1e-05	0.98	0.5	0.015	FALSE	FALSE	FALSE	FALSE	0.0023	0.017	2.1e-10	2.9e-08	0.83	0.42	0.95	0.55	0.77
fat	I	FBgn0039349	Ssadh	43092	31.26	993.17	0.0094	0.17	0.034	0.49	0.25	0.25	FALSE	FALSE	FALSE	FALSE	0.046	0.14	0.91	0.94	-0.0099	0.24	0.8	0.85	0.93
fat	I	FBgn0050000	GstT1	35995	31.22	658.15	0.00034	0.54	0.0026	0.78	0.42	0.1	FALSE	FALSE	TRUE	FALSE	0.85	0.91	0.00019	0.0012	0.44	0.015	0.25	0.41	0.67
fat	I	FBgn0034877	levy	37728	33.03	2722.27	0.0062	0.21	0.025	0.54	0.3	0.29	FALSE	FALSE	FALSE	FALSE	0.21	0.38	0.22	0.33	0.12	0.13	0.62	0.1	0.39
fat	I	FBgn0038166	CG9588	41672	28.95	763.95	0.014	0.14	0.047	0.44	0.22	0.29	FALSE	FALSE	TRUE	FALSE	0.37	0.54	0.00079	0.0037	0.32	0.025	0.31	0.39	0.65
fat	I	FBgn0052638	CG32638	318133	26.62	448.81	0.005	0.24	0.021	0.56	0.33	0.26	FALSE	FALSE	FALSE	FALSE	0.012	0.052	0.46	0.57	-0.079	0.69	1	0.11	0.39
fat	I	FBgn0037332	Hcs	40659	23.91	372.6	2.9e-05	0.77	0.00037	0.9	1.9	0.046	FALSE	TRUE	FALSE	FALSE	0.0021	0.016	0.64	0.73	0.17	1	1	0.91	0.96
fat	I	FBgn0038115	CG7966	41610	30.28	916.52	0.0035	0.28	0.016	0.6	0.29	0.25	FALSE	FALSE	FALSE	FALSE	0.068	0.17	9.8e-06	0.00012	0.52	0.19	0.72	0.36	0.64
fat	I	FBgn0035734	CG14823	38772	24.27	876.47	0.0033	0.29	0.016	0.61	1.3	0.29	FALSE	FALSE	FALSE	FALSE	0.073	0.18	0.5	0.61	0.27	0.89	1	0.023	0.25
fat	I	FBgn0083167	Neb-cGP	50417	30.76	2065.39	0.018	0.12	0.057	0.42	0.51	0.32	FALSE	FALSE	FALSE	FALSE	0.051	0.15	0.72	0.8	-0.07	0.8	1	0.046	0.3
fat	I	FBgn0011305	Rsf1	34370	25.52	289.36	0.03	0.085	0.083	0.35	0.35	0.31	FALSE	FALSE	FALSE	FALSE	0.23	0.41	0.55	0.66	0.09	0.35	0.9	0.48	0.72
fat	I	FBgn0042134	Capr	59172	30.8	1480.59	4.4e-07	0.95	1.3e-05	0.98	0.75	0.017	FALSE	TRUE	FALSE	FALSE	4.5e-07	4.5e-05	0.0052	0.017	-0.31	1	1	0.53	0.76
fat	I	FBgn0250843	Prosalpha6	34359	32.86	2260.51	2e-05	0.82	0.00028	0.92	0.35	0.044	FALSE	FALSE	TRUE	FALSE	0.48	0.65	0.00017	0.0011	0.29	0.0022	0.14	0.8	0.91
fat	I	FBgn0042213	CG18731	59246	23.35	96.43	0.0051	0.27	0.022	0.59	1.8	0.27	FALSE	FALSE	FALSE	FALSE	0.8	0.88	0.0023	0.0087	2	0.44	0.97	0.39	0.65
fat	I	FBgn0002284	Prosbeta6	39855	32.44	3231.49	0.0032	0.33	0.015	0.64	0.22	0.15	FALSE	FALSE	TRUE	FALSE	0.21	0.38	0.13	0.22	0.1	0.012	0.23	0.69	0.85
fat	I	FBgn0050035	Tret1-1	36248	30.04	13451.4	0.035	0.088	0.093	0.36	0.61	0.41	FALSE	FALSE	FALSE	FALSE	0.0078	0.039	4.3e-06	6.3e-05	1.7	0.97	1	0.18	0.48
fat	I	FBgn0030309	CG1572	32098	29.19	524.07	0.014	0.17	0.047	0.49	0.33	0.4	FALSE	FALSE	TRUE	FALSE	0.83	0.9	0.027	0.063	0.29	0.046	0.39	0.32	0.6
fat	I	FBgn0036857	CG9629	40097	33.4	3604.48	0.0095	0.21	0.035	0.54	0.18	0.35	FALSE	FALSE	TRUE	FALSE	0.19	0.35	0.35	0.47	0.058	0.0089	0.21	0.062	0.33
fat	I	FBgn0265356	tn	37190	24.41	2284.02	0.0019	0.4	0.01	0.69	1.6	0.19	FALSE	FALSE	FALSE	FALSE	0.0063	0.034	0.47	0.58	-0.32	0.99	1	0.2	0.49
fat	I	FBgn0030668	CG8128	32504	30.06	1566.11	0.038	0.088	0.098	0.36	0.2	0.44	FALSE	FALSE	FALSE	FALSE	0.046	0.14	0.44	0.55	-0.069	0.27	0.83	0.041	0.29
fat	I	FBgn0035688	fmt	38714	27.76	2540.27	0.023	0.13	0.069	0.43	0.34	0.22	FALSE	FALSE	FALSE	FALSE	0.4	0.57	0.22	0.33	0.17	0.19	0.73	0.036	0.27
fat	I	FBgn0037999	CG4860	41480	27.47	688.56	0.0019	0.4	0.01	0.69	0.66	0.19	FALSE	FALSE	FALSE	FALSE	0.91	0.95	0.0027	0.01	0.63	0.12	0.6	0.78	0.9
fat	I	FBgn0053129	CG33129	34514	31.77	1975.81	0.0033	0.34	0.016	0.65	0.36	0.23	FALSE	FALSE	FALSE	FALSE	0.11	0.25	0.32	0.43	0.11	0.27	0.83	0.65	0.83
fat	I	FBgn0034066	CG8397	36767	27.73	1535.05	0.036	0.097	0.094	0.38	0.28	0.38	FALSE	FALSE	FALSE	FALSE	0.0065	0.035	0.052	0.11	-0.26	0.86	1	0.19	0.48
fat	I	FBgn0037646	CAHbeta	41070	30.69	1325.15	0.0075	0.25	0.029	0.58	0.3	0.3	FALSE	FALSE	FALSE	FALSE	0.0027	0.019	3.1e-07	8.9e-06	0.79	0.85	1	0.22	0.52
fat	I	FBgn0032702	CG10376	35126	26.15	421.56	0.00096	0.5	0.0058	0.76	0.82	0.13	FALSE	FALSE	FALSE	FALSE	0.053	0.15	0.32	0.44	0.21	0.81	1	0.21	0.5
fat	I	FBgn0037279	CG1129	40599	29.71	597.24	0.0037	0.34	0.017	0.65	0.53	0.25	FALSE	FALSE	FALSE	FALSE	0.23	0.4	0.14	0.23	0.25	0.4	0.94	0.38	0.65
fat	I	FBgn0036763	TrpRS-m	39989	27	280.62	0.0026	0.39	0.013	0.68	0.47	0.2	FALSE	TRUE	FALSE	FALSE	0.00028	0.0037	0.01	0.029	-0.39	0.99	1	0.27	0.56
fat	I	FBgn0025687	LKRSDH	34064	33.25	1645.32	0.03	0.12	0.083	0.42	0.17	0.52	FALSE	FALSE	TRUE	FALSE	0.91	0.95	0.022	0.054	0.18	0.0025	0.14	0.042	0.29
fat	I	FBgn0033246	ACC	35761	28.52	107316	0.014	0.2	0.047	0.52	0.52	0.38	FALSE	FALSE	FALSE	FALSE	0.00032	0.0039	5e-08	2.1e-06	1.7	1	1	0.64	0.82
fat	I	FBgn0029689	CG6428	31351	27.03	699.93	0.0056	0.31	0.023	0.63	0.53	0.27	FALSE	FALSE	FALSE	FALSE	0.55	0.71	0.034	0.075	0.38	0.21	0.74	0.52	0.75
fat	I	FBgn0029897	RpL17	31613	33.06	24114.4	0.033	0.12	0.09	0.42	0.34	0.37	FALSE	FALSE	FALSE	FALSE	0.059	0.16	0.59	0.69	-0.08	0.65	1	0.053	0.31
fat	I	FBgn0036662	CG9706	39876	24.47	682.79	0.011	0.25	0.038	0.58	1.9	0.14	FALSE	FALSE	FALSE	FALSE	0.052	0.15	0.93	0.95	-0.06	0.95	1	0.44	0.69
fat	I	FBgn0039856	CG1774	43722	31.68	3654.53	0.0063	0.32	0.026	0.63	0.26	0.29	FALSE	FALSE	TRUE	FALSE	0.19	0.36	9.7e-05	0.00071	0.43	0.078	0.5	0.32	0.6
fat	I	FBgn0031877	CG10399	33978	28.33	210.82	0.00096	0.57	0.0058	0.8	0.48	0.13	FALSE	FALSE	TRUE	FALSE	0.93	0.96	0.0013	0.0055	0.46	0.036	0.36	0.51	0.74
fat	I	FBgn0003721	Tm1	41852	31.65	5542.16	0.017	0.21	0.055	0.53	0.38	0.23	FALSE	FALSE	FALSE	FALSE	0.016	0.064	0.26	0.37	-0.17	0.84	1	0.076	0.35
fat	I	FBgn0033265	coil	35785	23.52	89.2	0.0022	0.47	0.011	0.74	1.2	0.25	FALSE	TRUE	FALSE	FALSE	5.1e-06	0.00021	3.2e-05	0.0003	-1.9	1	1	0.74	0.87
fat	I	FBgn0038737	CG11447	42359	24.38	192.32	0.00037	0.68	0.0028	0.86	1.8	0.084	FALSE	FALSE	FALSE	FALSE	0.021	0.077	0.44	0.55	0.32	0.97	1	0.74	0.88
fat	I	FBgn0042127	CG18789	317813	25.65	118.38	0.021	0.19	0.063	0.52	0.83	0.4	FALSE	FALSE	FALSE	FALSE	0.77	0.87	0.049	0.1	0.69	0.33	0.9	0.46	0.7
fat	I	FBgn0011648	Mad	33529	23.92	752.5	0.00062	0.63	0.0042	0.83	2.2	0.081	FALSE	FALSE	FALSE	FALSE	0.1	0.23	0.11	0.19	0.91	0.89	1	0.36	0.63
fat	I	FBgn0028686	Rpt3	32047	33.03	2799.98	0.014	0.25	0.046	0.58	0.17	0.22	FALSE	FALSE	TRUE	FALSE	0.44	0.61	0.12	0.21	0.1	0.0039	0.16	0.53	0.75
fat	I	FBgn0038106	CG7488	41597	25.15	298.49	0.018	0.22	0.057	0.54	1.8	0.21	FALSE	FALSE	FALSE	FALSE	0.037	0.12	0.56	0.66	-0.41	0.96	1	0.54	0.76
fat	I	FBgn0030503	Tango2	32319	25.75	241.86	0.0056	0.38	0.023	0.67	0.6	0.22	FALSE	FALSE	FALSE	FALSE	0.063	0.17	0.73	0.81	0.066	0.76	1	0.82	0.92
fat	I	FBgn0045761	CHKov1	43067	25.6	902.3	0.038	0.15	0.098	0.46	0.45	0.3	FALSE	FALSE	FALSE	FALSE	0.041	0.13	4.6e-05	0.00039	1.1	0.84	1	0.18	0.47
fat	I	FBgn0039757	RpS7	43594	34.5	47037.9	0.018	0.24	0.057	0.56	0.21	0.28	FALSE	FALSE	FALSE	FALSE	0.0021	0.016	0.023	0.057	-0.2	0.74	1	0.15	0.44
fat	I	FBgn0001942	eIF4A	33835	34.08	33845.6	0.025	0.2	0.073	0.52	0.2	0.23	FALSE	FALSE	FALSE	FALSE	0.0011	0.0095	0.0066	0.021	-0.25	0.81	1	0.077	0.35
fat	I	FBgn0002563	Lsp1beta	33274	27.79	424.91	0.01	0.32	0.037	0.63	1.3	0.39	FALSE	FALSE	FALSE	FALSE	1.1e-05	0.00036	1.4e-09	1.4e-07	5.2	1	1	0.001	0.054
fat	I	FBgn0024352	Stip1	33202	31.47	1302.53	0.00031	0.75	0.0024	0.89	0.27	0.086	FALSE	FALSE	FALSE	FALSE	0.0049	0.028	0.94	0.96	-0.0046	0.23	0.78	0.46	0.7
fat	I	FBgn0024314	Plap	43978	29.81	1751.99	0.002	0.56	0.01	0.8	0.3	0.11	FALSE	FALSE	FALSE	FALSE	0.00094	0.0086	0.063	0.12	-0.16	0.85	1	0.85	0.93
fat	I	FBgn0003961	Uro	34060	29.85	482.18	0.022	0.24	0.066	0.57	0.58	0.39	FALSE	FALSE	FALSE	FALSE	0.067	0.17	0.81	0.87	-0.056	0.81	1	0.53	0.76
fat	I	FBgn0266720	Snap24	41193	27.42	526.03	0.024	0.23	0.07	0.56	0.4	0.24	FALSE	FALSE	FALSE	FALSE	0.48	0.65	0.17	0.26	0.23	0.22	0.77	0.27	0.56
fat	I	FBgn0015222	Fer1HCH	46415	33.37	30288.9	0.011	0.35	0.038	0.65	0.26	0.23	FALSE	FALSE	TRUE	FALSE	0.67	0.79	0.0028	0.01	0.31	0.02	0.28	0.061	0.33
fat	I	FBgn0260462	CG12163	40628	31.84	14851.8	0.0035	0.52	0.016	0.77	0.29	0.17	FALSE	FALSE	TRUE	FALSE	0.64	0.77	0.015	0.039	0.23	0.015	0.25	0.32	0.61
fat	I	FBgn0015789	Rab10	33025	28.5	3019.76	0.021	0.27	0.065	0.59	0.36	0.19	FALSE	FALSE	FALSE	FALSE	0.0019	0.015	0.017	0.044	-0.37	0.97	1	0.79	0.9
fat	I	FBgn0011787	mRpL12	44326	30.59	318.06	2.4e-05	0.93	0.00032	0.97	0.68	0.026	FALSE	TRUE	FALSE	FALSE	3.5e-06	0.00015	0.0016	0.0067	-0.45	1	1	0.3	0.58
fat	I	FBgn0037652	CG11980	41078	31.32	793.37	0.00013	0.85	0.0012	0.94	0.38	0.032	FALSE	FALSE	TRUE	FALSE	0.33	0.51	0.003	0.011	0.27	0.027	0.31	0.22	0.52
fat	I	FBgn0038961	CG13850	42630	29.45	631.02	0.00023	0.81	0.0019	0.92	0.37	0.033	FALSE	FALSE	FALSE	FALSE	0.00034	0.0041	0.12	0.2	-0.13	0.91	1	0.81	0.91
fat	I	FBgn0026144	CBP	31669	26.16	185.49	1.9e-05	0.94	0.00027	0.98	3.5	0.033	FALSE	TRUE	FALSE	FALSE	0.00019	0.0027	0.4	0.52	-0.52	1	1	0.4	0.66
fat	I	FBgn0026418	Hsc70Cb	39557	33.49	4261.03	1.8e-05	0.94	0.00025	0.98	0.33	0.01	FALSE	FALSE	TRUE	FALSE	0.4	0.57	0.00024	0.0014	0.26	0.0017	0.13	0.25	0.54
fat	I	FBgn0034733	CG4752	37569	31.71	2394.36	0.0042	0.52	0.019	0.77	0.24	0.15	FALSE	FALSE	FALSE	FALSE	3.5e-05	0.00085	2.4e-09	2.1e-07	0.81	0.98	1	0.48	0.72
fat	I	FBgn0040284	SF2	53443	30.34	924.35	0.034	0.22	0.091	0.55	0.17	0.21	FALSE	FALSE	TRUE	FALSE	0.58	0.73	0.15	0.25	0.11	0.0067	0.19	0.78	0.9
fat	I	FBgn0028695	Rpn1	40174	32.84	3180.91	0.017	0.33	0.055	0.64	0.14	0.16	FALSE	FALSE	TRUE	FALSE	0.04	0.12	0.62	0.71	-0.028	0.023	0.3	0.6	0.8
fat	I	FBgn0052626	AMPdeam	32352	31.93	3746.27	0.02	0.3	0.062	0.62	0.18	0.21	FALSE	FALSE	FALSE	FALSE	1.9e-05	0.00053	3.8e-09	2.8e-07	0.77	0.99	1	0.13	0.43
fat	I	FBgn0039163	CG5515	42875	29.01	810.83	0.0076	0.45	0.029	0.72	0.42	0.12	FALSE	FALSE	FALSE	FALSE	0.16	0.32	8.6e-05	0.00064	0.71	0.4	0.94	0.36	0.64
fat	I	FBgn0025682	scf	38145	28.31	507.65	0.021	0.3	0.064	0.62	0.33	0.21	FALSE	FALSE	FALSE	FALSE	0.44	0.61	0.18	0.27	0.18	0.15	0.66	0.78	0.9
fat	I	FBgn0030799	CG4872	32676	28.62	236.45	0.018	0.33	0.057	0.64	0.77	0.22	FALSE	FALSE	FALSE	FALSE	0.12	0.26	0.76	0.83	0.093	0.78	1	0.75	0.88
fat	I	FBgn0013746	alien	34225	28.49	694.2	0.0078	0.46	0.03	0.73	0.28	0.19	FALSE	FALSE	TRUE	FALSE	1	1	0.0079	0.024	0.28	0.0097	0.21	0.75	0.88
fat	I	FBgn0052109	CG32109	39444	26.18	108.94	0.0058	0.52	0.024	0.77	0.52	0.2	FALSE	FALSE	FALSE	FALSE	0.25	0.43	0.16	0.26	0.24	0.39	0.94	0.95	0.97
fat	I	FBgn0034391	CG15080	37167	26.9	5.26	0.015	0.38	0.05		0.48	0.34	FALSE	FALSE	FALSE	FALSE	0.011	0.05	0.2	0.3	-0.24	0.92	1	0.47
fat	I	FBgn0034817	Art7	37664	24.66	525.65	0.0024	0.66	0.012	0.85	1.4	0.092	FALSE	FALSE	FALSE	FALSE	0.55	0.7	0.016	0.041	1.1	0.51	1	0.49	0.73
fat	I	FBgn0036173	CG7394	39294	28.7	329.59	0.019	0.37	0.059	0.67	0.54	0.17	FALSE	FALSE	FALSE	FALSE	0.33	0.51	0.0009	0.0041	0.84	0.44	0.97	0.33	0.61
fat	I	FBgn0004926	eIF2beta	39433	30.25	2660.88	0.014	0.42	0.047	0.7	0.24	0.13	FALSE	FALSE	FALSE	FALSE	0.12	0.26	0.69	0.77	0.036	0.15	0.66	0.81	0.91
fat	I	FBgn0265574	Cdc5	38062	25.86	509.66	0.00097	0.76	0.0058	0.9	0.74	0.061	FALSE	FALSE	FALSE	FALSE	0.069	0.17	0.24	0.35	0.23	0.74	1	0.17	0.46
fat	I	FBgn0037810	sle	41262	26.69	508.48	3.2e-06	0.98	6.4e-05	0.99	2.1	0.0088	FALSE	TRUE	FALSE	FALSE	9.6e-06	0.00032	0.064	0.12	-0.63	1	1	0.62	0.81
fat	I	FBgn0027560	Tps1	33642	37.26	148195	0.0041	0.61	0.019	0.82	0.23	0.15	FALSE	FALSE	FALSE	FALSE	0.0062	0.034	5e-07	1.3e-05	0.53	0.36	0.91	0.21	0.5
fat	I	FBgn0025373	Fpps	36209	28.19	206.83	0.019	0.4	0.058	0.68	0.37	0.21	FALSE	FALSE	FALSE	FALSE	0.4	0.58	0.0014	0.0059	0.54	0.21	0.75	0.79	0.9
fat	I	FBgn0262467	Scox	33711	29.33	525.24	0.00015	0.9	0.0013	0.96	0.48	0.026	FALSE	FALSE	FALSE	FALSE	0.00022	0.003	0.097	0.18	-0.17	0.98	1	0.25	0.55
fat	I	FBgn0039140	Miro	42845	25.76	1407.52	0.038	0.29	0.098	0.61	0.32	0.14	FALSE	FALSE	FALSE	FALSE	0.026	0.092	2.4e-05	0.00023	0.81	0.76	1	0.66	0.84
fat	I	FBgn0029117	Surf1	44498	25.09	244.29	0.00097	0.78	0.0058	0.91	2.8	0.044	FALSE	FALSE	FALSE	FALSE	0.13	0.27	0.11	0.19	1.2	0.89	1	0.034	0.27
fat	I	FBgn0004908	Arl2	40993	26.54	86.57	0.0038	0.64	0.017	0.84	0.38	0.12	FALSE	FALSE	TRUE	FALSE	0.48	0.65	0.033	0.074	0.26	0.087	0.52	0.44	0.69
fat	I	FBgn0032703	CG10343	35127	26.63	206.41	0.023	0.38	0.068	0.67	0.32	0.17	FALSE	FALSE	FALSE	FALSE	0.087	0.21	8.9e-05	0.00066	0.65	0.48	0.99	0.56	0.77
fat	I	FBgn0030245	CG1637	32019	28.28	2871.22	0.0028	0.69	0.014	0.86	0.42	0.075	FALSE	FALSE	TRUE	FALSE	0.57	0.72	0.017	0.043	0.32	0.087	0.52	0.55	0.77
fat	I	FBgn0004087	Dhfr	42003	27.65	608.27	0.024	0.38	0.07	0.68	0.65	0.15	FALSE	FALSE	FALSE	FALSE	0.63	0.76	0.094	0.17	0.46	0.34	0.9	0.93	0.97
fat	I	FBgn0051550	CG31550	40661	23.59	525.06	0.03	0.37	0.082	0.67	1.2	0.16	FALSE	FALSE	FALSE	FALSE	0.58	0.73	0.13	0.22	0.78	0.53	1	0.39	0.65
fat	I	FBgn0032068	LManV	34205	23.83	73.73	0.0062	0.62	0.025	0.82	3.8	0.2	FALSE	FALSE	FALSE	FALSE	0.04	0.12	0.97	0.98	-0.04	0.97	1	0.082	0.36
fat	I	FBgn0010423	TpnC47D	36195	31.69	147.3	0.03	0.38	0.083	0.67	0.27	0.27	FALSE	FALSE	FALSE	FALSE	0.066	0.17	0.69	0.77	-0.047	0.45	0.97	0.17	0.46
fat	I	FBgn0028693	Rpn12	39845	31.35	2246.16	0.0086	0.58	0.032	0.81	0.39	0.084	FALSE	FALSE	FALSE	FALSE	0.056	0.15	0.95	0.97	0.0081	0.59	1	0.86	0.94
fat	I	FBgn0058042	Tim23	3355096	27.96	947.68	0.00037	0.89	0.0028	0.96	0.52	0.036	FALSE	FALSE	FALSE	FALSE	0.0065	0.034	0.98	0.99	0.0027	0.85	1	0.77	0.89
fat	I	FBgn0003008	or	43943	25.39	229.83	0.022	0.46	0.067	0.73	0.27	0.14	FALSE	FALSE	TRUE	FALSE	0.47	0.64	0.16	0.26	0.16	0.071	0.48	0.54	0.76
fat	I	FBgn0032725	Nedd8	35151	28.44	379.58	0.0055	0.68	0.023	0.86	1.1	0.11	FALSE	FALSE	FALSE	FALSE	0.067	0.17	0.69	0.77	0.14	0.88	1	0.89	0.95
fat	I	FBgn0033184	mEFTu2	35681	27.79	930.82	0.023	0.49	0.069	0.75	0.25	0.15	FALSE	FALSE	FALSE	FALSE	0.027	0.095	0.37	0.49	-0.092	0.5	1	0.84	0.93
fat	I	FBgn0032690	CG10333	35112	26.05	513.09	0.035	0.43	0.094	0.71	1.1	0.1	FALSE	FALSE	FALSE	FALSE	0.0064	0.034	0.051	0.11	-1.1	0.99	1	0.24	0.53
fat	I	FBgn0031010	CG8028	32923	24.02	223.3	0.0021	0.82	0.011	0.93	0.95	0.079	FALSE	TRUE	FALSE	FALSE	0.0021	0.016	0.15	0.25	-0.39	0.99	1	0.48	0.72
fat	I	FBgn0261014	TER94	36040	34.82	12206	0.014	0.64	0.047	0.84	0.16	0.065	FALSE	FALSE	TRUE	FALSE	0.35	0.53	0.00071	0.0034	0.23	0.0023	0.14	0.77	0.89
fat	I	FBgn0026084	cib	31359	30.76	477.02	0.00051	0.93	0.0036	0.97	0.51	0.027	FALSE	FALSE	FALSE	FALSE	0.00062	0.0064	0.12	0.21	-0.2	0.98	1	0.52	0.75
fat	I	FBgn0032236	mRpS7	34412	27.27	278.6	0.0036	0.81	0.017	0.92	0.42	0.044	FALSE	FALSE	FALSE	FALSE	0.018	0.071	0.74	0.82	-0.041	0.74	1	0.43	0.68
fat	I	FBgn0036547	CG17032	39736	25.63	1605.84	0.013	0.66	0.044	0.85	1.5	0.12	FALSE	FALSE	FALSE	FALSE	0.0065	0.035	0.13	0.22	-0.89	0.99	1	0.039	0.28
fat	I	FBgn0027329	CCT6	32518	32.3	2411.75	0.00021	0.96	0.0018	0.98	0.41	0.012	FALSE	FALSE	FALSE	FALSE	0.015	0.062	0.41	0.53	0.073	0.48	0.99	0.061	0.33
fat	I	FBgn0036553	CG17027	39742	25.76	283.08	0.03	0.56	0.083	0.79	0.38	0.17	FALSE	FALSE	FALSE	FALSE	0.25	0.42	0.51	0.62	0.11	0.39	0.94	0.76	0.89
fat	I	FBgn0029092	ced-6	35971	29.7	7992.89	0.0093	0.74	0.034	0.89	0.27	0.073	FALSE	FALSE	FALSE	FALSE	0.22	0.39	0.00018	0.0011	0.44	0.1	0.56	0.15	0.44
fat	I	FBgn0001149	GstD1	41503	33.84	3420.96	0.0011	0.92	0.0062	0.97	0.37	0.02	FALSE	FALSE	FALSE	FALSE	0.041	0.13	1.7e-06	3.3e-05	0.66	0.36	0.91	0.99	1
fat	I	FBgn0030263	CG2076	32041	23.52	867.29	0.0098	0.75	0.036	0.89	1.8	0.079	FALSE	TRUE	FALSE	FALSE	0.004	0.025	0.091	0.17	-1.1	1	1	0.89	0.95
fat	I	FBgn0002593	RpLP1	33214	33.88	43506.4	0.037	0.55	0.097	0.79	0.23	0.15	FALSE	FALSE	TRUE	FALSE	0.34	0.52	0.4	0.52	0.088	0.096	0.55	0.18	0.48
fat	I	FBgn0037550	CG9667	40960	24.83	200.51	0.032	0.6	0.087	0.82	0.88	0.12	FALSE	FALSE	FALSE	FALSE	0.082	0.2	0.78	0.84	-0.11	0.88	1	0.59	0.8
fat	I	FBgn0022349	CG1910	43741	30.77	1446.61	0.036	0.62	0.095	0.83	0.23	0.11	FALSE	FALSE	FALSE	FALSE	0.18	0.34	0.0005	0.0026	0.42	0.16	0.68	0.48	0.72
fat	I	FBgn0036942	CG7328	40204	28.31	141.53	0.011	0.79	0.039	0.91	0.3	0.072	FALSE	FALSE	FALSE	FALSE	0.11	0.24	5.8e-05	0.00046	0.55	0.27	0.83	0.55	0.76
fat	I	FBgn0016041	Tom40	44978	31.13	700.24	0.032	0.66	0.087	0.85	0.2	0.11	FALSE	FALSE	FALSE	FALSE	0.009	0.043	0.086	0.16	-0.15	0.53	1	0.61	0.8
fat	I	FBgn0039580	Gfat2	43373	27.79	990.11	0.013	0.8	0.044	0.91	0.31	0.044	FALSE	FALSE	FALSE	FALSE	0.25	0.43	0.29	0.4	0.12	0.17	0.69	0.42	0.68
fat	I	FBgn0001217	Hsc70-2	41609	25.27	15.21	0.026	0.72	0.074	0.88	2.1	0.13	FALSE	FALSE	FALSE	FALSE	0.11	0.24	0.97	0.98	0.03	0.91	1	0.85	0.93
fat	I	FBgn0263594	lost	40559	33.29	11331.8	0.027	0.73	0.077	0.88	0.14	0.074	FALSE	FALSE	FALSE	FALSE	0.001	0.0092	0.0058	0.019	-0.18	0.4	0.94	0.62	0.81
fat	I	FBgn0001995	mRpL4	49425	27.66	372.82	0.024	0.76	0.07	0.9	0.39	0.055	FALSE	TRUE	FALSE	FALSE	0.00017	0.0026	0.00051	0.0027	-0.67	1	1	0.54	0.76
fat	I	FBgn0032247	CG5188	34428	26.24	139.54	0.024	0.77	0.07	0.9	0.35	0.061	FALSE	FALSE	FALSE	FALSE	0.14	0.28	0.0002	0.0013	0.67	0.45	0.97	0.91	0.96
fat	I	FBgn0263197	Patronin	36978	24.69	1725.37	0.015	0.82	0.049	0.93	1.1	0.039	FALSE	FALSE	FALSE	FALSE	0.4	0.57	0.001	0.0047	1.6	0.61	1	0.4	0.66
fat	I	FBgn0036735	Edc3	39957	24.37	681.59	0.033	0.74	0.09	0.89	1.3	0.071	FALSE	FALSE	FALSE	FALSE	0.82	0.89	0.017	0.044	1.4	0.42	0.95	0.61	0.8
fat	I	FBgn0021768	nudC	39879	30.07	611.1	0.0076	0.9	0.029	0.96	0.29	0.026	FALSE	FALSE	FALSE	FALSE	0.015	0.063	0.45	0.56	-0.076	0.58	1	0.12	0.41
fat	I	FBgn0031995	CG8475	34114	29.72	3482.29	0.0091	0.92	0.033	0.97	0.19	0.023	FALSE	FALSE	FALSE	FALSE	0.031	0.11	7.7e-06	0.0001	0.41	0.11	0.57	0.91	0.96
fat	I	FBgn0028582	lqf	38846	28.62	1325.07	0.032	0.83	0.087	0.93	0.23	0.038	FALSE	FALSE	FALSE	FALSE	0.042	0.13	4.1e-05	0.00036	0.54	0.4	0.94	0.26	0.55
fat	I	FBgn0015778	rin	47998	30.91	1053.01	0.01	0.93	0.036	0.97	0.25	0.022	FALSE	FALSE	FALSE	FALSE	0.0084	0.042	0.21	0.31	-0.11	0.56	1	0.9	0.96
fat	I	FBgn0266521	stai	33863	26.9	409.83	0.0088	0.96	0.033	0.98	0.86	0.023	FALSE	TRUE	FALSE	FALSE	2.1e-05	0.00056	6.8e-05	0.00053	-1.5	1	1	0.26	0.55
fat	I	FBgn0037549	CG7878	40959	25.58	834.88	0.026	0.91	0.075	0.96	1.1	0.02	FALSE	FALSE	FALSE	FALSE	0.042	0.13	0.51	0.62	-0.3	0.94	1	0.14	0.43
fat	I	FBgn0025628	CG4199	31174	31.79	4540.38	0.0033	0.98	0.016	0.99	0.32	0.0056	FALSE	FALSE	FALSE	FALSE	0.16	0.32	0.2	0.3	0.12	0.14	0.63	0.8	0.91
fat	I	FBgn0033235	CG8728	35748	30.06	855.97	0.032	0.94	0.086	0.98	0.2	0.013	FALSE	FALSE	TRUE	FALSE	0.46	0.62	0.23	0.33	0.11	0.029	0.33	0.31	0.59
fat	I	FBgn0030366	Usp7	32169	30.13	2628.54	0.026	0.95	0.075	0.98	0.17	0.0098	FALSE	FALSE	TRUE	FALSE	0.51	0.67	0.0034	0.012	0.24	0.0076	0.19	0.95	0.98
fat	I	FBgn0010602	lwr	33226	30.06	610.52	0.00031	1	0.0024	1	0.36	0.00026	FALSE	FALSE	TRUE	FALSE	0.83	0.9	0.00062	0.0031	0.34	0.007	0.19	0.15	0.44
fat	I	FBgn0040396	CG3939	31295	26.88	173.64	0.031	0.98	0.085	0.99	0.33	0.0072	FALSE	FALSE	TRUE	FALSE	0.88	0.93	0.02	0.05	0.36	0.07	0.48	0.31	0.6
fat	I	FBgn0004237	Hrb87F	48535	30.13	476.4	0.0072	1	0.028	1	0.37	0.0011	FALSE	FALSE	FALSE	FALSE	0.033	0.11	0.83	0.88	-0.027	0.63	1	0.71	0.86
fat	I	FBgn0051694	CG31694	33489	28.17	3869.04	0.037	0.98	0.097	0.99	0.36	0.0032	FALSE	TRUE	FALSE	FALSE	0.00056	0.0059	0.0017	0.0069	-0.59	0.99	1	0.47	0.71
fat	II	FBgn0261675	Npc1b	33072	24.17	122.84	0.00066	3.6e-12	0.0043	9.2e-10	2.9	-1.9	TRUE	FALSE	FALSE	FALSE	0.048	0.14	0.27	0.39	0.8	0.95	1	0.12	0.4
fat	II	FBgn0025390	Mur2B	31111	25.83	2635.34	0.00066	1.8e-09	0.0043	2.3e-07	2.4	-1.5	TRUE	TRUE	FALSE	FALSE	0.00048	0.0053	0.073	0.14	-1.1	1	1	0.81	0.91
fat	II	FBgn0015929	dpa	35679	26.86	669.97	2.7e-11	0.39	1.4e-08	0.68	3.6	-0.35	TRUE	TRUE	FALSE	FALSE	2.5e-10	2.7e-07	0.0034	0.012	-0.83	1	1	0.12	0.42
fat	II	FBgn0029697	CG15570	31366	28.56	811.09	0.0002	0.00062	0.0017	0.013	2.6	-1.1	TRUE	TRUE	FALSE	FALSE	0.0027	0.019	0.8	0.86	-0.14	1	1	0.49	0.73
fat	II	FBgn0032127	CG13114	34272	25.62	393.54	0.00026	0.00093	0.0021	0.018	2.3	-1.1	TRUE	TRUE	FALSE	FALSE	3.1e-08	8.2e-06	9.2e-08	3.4e-06	-4.4	1	1	0.74	0.88
fat	II	FBgn0000615	exu	37345	26.77	2792.21	1.8e-08	0.17	1.3e-06	0.49	2.7	-0.54	TRUE	TRUE	FALSE	FALSE	9.9e-11	1.4e-07	2.7e-08	1.3e-06	-2.6	1	1	0.11	0.4
fat	II	FBgn0017577	Mcm5	41296	26.16	866.82	1.1e-08	0.27	9.3e-07	0.59	3.5	-0.43	TRUE	TRUE	FALSE	FALSE	8.7e-06	0.00029	0.21	0.32	0.45	1	1	0.11	0.4
fat	II	FBgn0004872	piwi	34521	26.67	413.96	3.5e-11	0.63	1.5e-08	0.83	4.1	-0.19	TRUE	TRUE	FALSE	FALSE	1.7e-08	5.6e-06	0.52	0.63	0.18	1	1	0.28	0.57
fat	II	FBgn0262526	solo	34884	27.05	288.27	9.4e-08	0.23	4.7e-06	0.56	4.3	-0.48	TRUE	TRUE	FALSE	FALSE	5.9e-07	5.1e-05	0.051	0.11	-1	1	1	0.077	0.35
fat	II	FBgn0265991	Zasp52	36740	27.63	1356.3	2.2e-06	0.1	4.8e-05	0.38	0.97	-0.57	TRUE	FALSE	FALSE	FALSE	0.66	0.79	7.5e-06	9.9e-05	0.88	0.11	0.58	0.23	0.52
fat	II	FBgn0000360	Cp38	31788	30.68	4486.55	0.0042	0.00084	0.019	0.016	1.5	-1.1	TRUE	TRUE	FALSE	FALSE	1.1e-06	7.6e-05	1.9e-06	3.6e-05	-3.1	1	1	0.89	0.95
fat	II	FBgn0046214	vig2	43016	28.73	4057.65	3.8e-07	0.21	1.2e-05	0.53	1	-0.3	TRUE	TRUE	FALSE	FALSE	4.5e-05	0.001	0.8	0.86	0.032	1	1	0.025	0.26
fat	II	FBgn0035328	yellow-g2	38295	27.35	1007.22	0.0012	0.0034	0.0069	0.047	1.8	-0.94	TRUE	TRUE	FALSE	FALSE	8.5e-05	0.0015	0.0039	0.014	-1.5	1	1	0.26	0.55
fat	II	FBgn0250837	dUTPase	34529	28.35	765.93	1.8e-07	0.31	7.2e-06	0.63	2.2	-0.41	TRUE	TRUE	FALSE	FALSE	6.7e-08	1.4e-05	0.00049	0.0026	-1.1	1	1	0.046	0.3
fat	II	FBgn0041775	tral	39430	31.63	2505.23	7.2e-08	0.38	3.9e-06	0.67	1.4	-0.3	TRUE	TRUE	FALSE	FALSE	2.5e-06	0.00012	0.41	0.53	-0.13	1	1	0.19	0.49
fat	II	FBgn0041709	yellow-g	38294	28.42	633.83	0.0041	0.0019	0.018	0.03	1.5	-1.1	TRUE	TRUE	FALSE	FALSE	7.7e-05	0.0014	0.001	0.0046	-1.8	1	1	0.78	0.89
fat	II	FBgn0037376	Hat1	40716	27.18	595.31	8.5e-07	0.23	2.3e-05	0.56	1.2	-0.43	TRUE	TRUE	FALSE	FALSE	1.3e-06	8.5e-05	0.014	0.038	-0.43	1	1	0.057	0.32
fat	II	FBgn0025815	Mcm6	31603	25.92	712.54	1.2e-07	0.37	5.2e-06	0.67	3.6	-0.36	TRUE	TRUE	FALSE	FALSE	1.2e-05	0.00037	0.99	0.99	0.0051	1	1	0.036	0.27
fat	II	FBgn0085362	Vml	5740271	28.68	105.45	2e-06	0.2	4.5e-05	0.52	2.3	-0.47	TRUE	TRUE	FALSE	FALSE	6.2e-05	0.0012	0.65	0.74	-0.15	1	1	0.73	0.87
fat	II	FBgn0261862	whd	36109	32.12	9036.77	7e-06	0.14	0.00012	0.45	0.41	-0.35	TRUE	FALSE	TRUE	FALSE	0.9	0.94	1e-05	0.00012	0.4	0.0011	0.13	0.94	0.97
fat	II	FBgn0034259	P32	37006	32.03	1178.2	2.1e-06	0.21	4.7e-05	0.53	0.56	-0.42	TRUE	FALSE	FALSE	FALSE	0.0014	0.012	0.14	0.23	0.13	0.79	1	0.054	0.31
fat	II	FBgn0263038	CG43333	34830	25.41	43.46	0.0034	0.0035	0.016	0.047	0.41	-1.1	TRUE	FALSE	FALSE	FALSE	0.0054	0.03	0.29	0.4	-0.13	0.88	1	0.74	0.87
fat	II	FBgn0024332	Mcm3	31449	26.6	766.16	3.7e-07	0.33	1.2e-05	0.64	3.4	-0.38	TRUE	TRUE	FALSE	FALSE	5.2e-06	0.00021	0.23	0.33	-0.54	1	1	0.11	0.39
fat	II	FBgn0035001	Slik	37893	24.76	2672.32	1.1e-05	0.13	0.00018	0.43	3.4	-0.18	TRUE	FALSE	FALSE	FALSE	0.34	0.52	0.0002	0.0013	2.7	0.71	1	0.61	0.81
fat	II	FBgn0031148	Cbs	33081	27.77	648.68	8.6e-09	0.62	8.2e-07	0.82	2.9	-0.16	TRUE	TRUE	FALSE	FALSE	5.7e-05	0.0012	0.014	0.037	0.79	1	1	0.012	0.19
fat	II	FBgn0010039	GstD3	48336	25.31	102.39	6e-06	0.17	0.0001	0.49	2.5	-0.4	TRUE	FALSE	FALSE	FALSE	0.017	0.069	0.016	0.042	1	0.97	1	0.19	0.48
fat	II	FBgn0031111	Obp19c	33039	26.21	261.68	8e-05	0.063	0.00081	0.31	1.8	-0.56	TRUE	TRUE	FALSE	FALSE	2.5e-07	3.1e-05	6.7e-06	9e-05	-2.2	1	1	0.12	0.41
fat	II	FBgn0261710	nocte	31976	27.95	1503.36	0.00051	0.022	0.0036	0.16	0.59	-0.44	TRUE	FALSE	TRUE	FALSE	0.77	0.87	0.00021	0.0013	0.65	0.084	0.51	0.47	0.71
fat	II	FBgn0038277	RpS5b	41807	28.72	3689.6	1.4e-06	0.28	3.4e-05	0.6	2.6	-0.42	TRUE	TRUE	FALSE	FALSE	8.9e-07	6.6e-05	0.0041	0.014	-1.2	1	1	0.14	0.43
fat	II	FBgn0029915	CG14434	31632	26.71	260.55	3.9e-05	0.11	0.00046	0.39	1.1	-0.59	TRUE	FALSE	FALSE	FALSE	0.12	0.26	0.0058	0.019	0.62	0.66	1	0.027	0.26
fat	II	FBgn0004649	yl	32367	29.12	9638.79	5.4e-05	0.093	0.00059	0.37	2.7	-0.66	TRUE	TRUE	FALSE	FALSE	0.00013	0.0021	0.12	0.21	-0.81	1	1	0.086	0.36
fat	II	FBgn0014465	Cp7Fb	31785	26.09	533.33	3.6e-06	0.25	6.9e-05	0.57	2	-0.37	TRUE	TRUE	FALSE	FALSE	1.4e-08	5.6e-06	1.1e-06	2.3e-05	-2.2	1	1	0.1	0.39
fat	II	FBgn0022288	l(2)09851	46662	27	654.97	0.0001	0.073	0.00097	0.33	0.57	-0.38	TRUE	TRUE	FALSE	FALSE	3.9e-05	0.00089	0.015	0.039	-0.31	1	1	0.0094	0.17
fat	II	FBgn0000454	Dip-B	48450	32.3	2729.67	0.004	0.0064	0.018	0.073	0.28	-0.51	TRUE	FALSE	TRUE	FALSE	0.2	0.37	0.17	0.27	0.12	0.072	0.48	0.013	0.2
fat	II	FBgn0032788	CG13084	35229	29.44	293.78	0.0008	0.024	0.005	0.17	1.2	-0.73	TRUE	TRUE	FALSE	FALSE	0.0017	0.013	0.24	0.35	-0.36	1	1	0.79	0.9
fat	II	FBgn0010621	CCT5	36308	32.38	2192.44	9.7e-08	0.54	4.7e-06	0.78	0.68	-0.15	TRUE	TRUE	FALSE	FALSE	1e-05	0.00033	0.98	0.99	0.0018	1	1	0.066	0.33
fat	II	FBgn0016685	Nlp	43560	31.73	1243.12	8.1e-08	0.56	4.2e-06	0.79	0.62	-0.17	TRUE	TRUE	FALSE	FALSE	1.6e-08	5.6e-06	9.1e-05	0.00067	-0.36	1	1	0.079	0.35
fat	II	FBgn0010097	gammaTub37C	35199	24.52	225.48	3.1e-07	0.47	1.1e-05	0.74	2	-0.28	TRUE	TRUE	FALSE	FALSE	2.8e-06	0.00013	0.12	0.21	-0.4	1	1	0.27	0.56
fat	II	FBgn0032789	CG13083	35230	28.97	279.71	0.00044	0.044	0.0032	0.25	1.6	-0.66	TRUE	TRUE	FALSE	FALSE	0.00029	0.0037	0.054	0.11	-0.75	1	1	0.76	0.89
fat	II	FBgn0015019	CCT3	42029	32.47	2631.61	1.4e-06	0.4	3.4e-05	0.68	0.55	-0.22	TRUE	FALSE	FALSE	FALSE	2.4e-05	0.00063	0.38	0.5	-0.069	0.99	1	0.029	0.26
fat	II	FBgn0039117	tst	42813	26.49	594.17	0.00042	0.055	0.0031	0.28	1.1	-0.24	TRUE	FALSE	FALSE	FALSE	0.013	0.056	0.67	0.75	0.12	0.96	1	0.18	0.47
fat	II	FBgn0041252	Femcoat	31367	26.54	193.96	0.00024	0.079	0.0019	0.34	1.9	-0.56	TRUE	TRUE	FALSE	FALSE	7e-05	0.0013	0.015	0.039	-1.1	1	1	0.93	0.97
fat	II	FBgn0011715	Snr1	40657	24.13	456.11	1e-06	0.45	2.7e-05	0.72	2.1	-0.21	TRUE	TRUE	FALSE	FALSE	5.4e-06	0.00021	0.089	0.17	-0.52	1	1	0.058	0.32
fat	II	FBgn0003676	CCT1	42649	32.19	2867.34	3.3e-05	0.19	0.0004	0.52	0.47	-0.4	TRUE	FALSE	FALSE	FALSE	0.00017	0.0025	0.24	0.35	-0.1	0.97	1	0.016	0.22
fat	II	FBgn0051075	CG31075	43244	30.37	695.84	6.4e-06	0.32	0.00011	0.63	0.61	-0.26	TRUE	FALSE	TRUE	FALSE	0.94	0.96	8e-06	0.0001	0.59	0.013	0.24	0.0084	0.17
fat	II	FBgn0036927	Gabat	40188	31.54	794.96	0.00027	0.085	0.0021	0.35	0.41	-0.63	TRUE	TRUE	FALSE	FALSE	1.8e-07	2.5e-05	1.3e-06	2.7e-05	-0.65	1	1	0.034	0.27
fat	II	FBgn0032906	RPA2	35364	29.25	337.43	1.1e-05	0.28	0.00017	0.6	0.9	-0.43	TRUE	TRUE	FALSE	FALSE	1.1e-07	1.8e-05	1.2e-05	0.00014	-0.89	1	1	0.043	0.29
fat	II	FBgn0028700	RfC38	34550	26.28	277.42	3e-05	0.21	0.00037	0.54	1.8	-0.48	TRUE	TRUE	FALSE	FALSE	0.00018	0.0027	0.28	0.4	-0.35	1	1	0.06	0.33
fat	II	FBgn0042185	MCU	59223	26.79	460.49	0.0018	0.03	0.0096	0.2	0.79	-0.51	TRUE	FALSE	FALSE	FALSE	0.043	0.13	0.56	0.66	0.13	0.85	1	0.21	0.51
fat	II	FBgn0038471	CG5220	42056	24.07	204.15	0.00075	0.057	0.0048	0.29	1.3	-0.35	TRUE	FALSE	FALSE	FALSE	0.39	0.57	0.011	0.032	0.93	0.56	1	0.046	0.3
fat	II	FBgn0032986	CG3262	35452	26.53	881.7	1.3e-06	0.5	3.2e-05	0.76	0.7	-0.11	TRUE	FALSE	FALSE	FALSE	0.08	0.2	0.00027	0.0016	0.44	0.28	0.84	0.93	0.97
fat	II	FBgn0011703	RnrL	34392	28.68	1003.42	5.6e-05	0.23	0.0006	0.55	2.5	-0.49	TRUE	TRUE	FALSE	FALSE	0.0018	0.014	0.92	0.95	0.046	1	1	0.049	0.3
fat	II	FBgn0061200	Nup153	32630	26.48	1413.69	0.00045	0.1	0.0032	0.38	0.63	-0.25	TRUE	FALSE	FALSE	FALSE	0.014	0.058	0.67	0.76	0.063	0.85	1	0.42	0.68
fat	II	FBgn0259111	Ndae1	34005	27.82	4591.74	0.00014	0.18	0.0013	0.5	0.39	-0.35	TRUE	FALSE	TRUE	FALSE	0.49	0.65	1.7e-05	0.00018	0.48	0.019	0.28	0.77	0.89
fat	II	FBgn0014861	Mcm2	40973	26.16	864.95	7.8e-05	0.23	0.00079	0.55	1.7	-0.49	TRUE	TRUE	FALSE	FALSE	7e-05	0.0013	0.042	0.091	-0.74	1	1	0.054	0.31
fat	II	FBgn0033635	Prip	36237	27.39	738.79	0.00049	0.11	0.0035	0.4	0.71	-0.58	TRUE	TRUE	FALSE	FALSE	6.8e-06	0.00025	0.00021	0.0013	-0.78	1	1	0.034	0.27
fat	II	FBgn0000359	Cp36	31787	32.09	6760.46	0.025	0.006	0.072	0.07	1.3	-0.85	TRUE	TRUE	FALSE	FALSE	6.2e-05	0.0012	0.00011	0.00081	-2.6	1	1	0.74	0.88
fat	II	FBgn0038611	CG14309	42212	28.72	776.32	0.028	0.0059	0.078	0.07	0.63	-1.1	TRUE	TRUE	FALSE	FALSE	6.6e-06	0.00025	4.3e-06	6.3e-05	-1.7	1	1	0.16	0.45
fat	II	FBgn0053853	His2A:CG33853	3772139	30.2	18748.2	0.00062	0.12	0.0041	0.41	1.1	-0.61	TRUE	FALSE	FALSE	FALSE	0.51	0.67	8e-05	0.00061	1.4	0.41	0.95	0.032	0.27
fat	II	FBgn0032444	CCT4	34674	31.83	2010.45	8.3e-05	0.26	0.00084	0.58	0.67	-0.28	TRUE	TRUE	FALSE	FALSE	4.7e-05	0.001	0.023	0.055	-0.33	1	1	0.044	0.3
fat	II	FBgn0035173	CG13907	38104	27.46	1108.02	0.0032	0.051	0.015	0.27	0.53	-0.39	TRUE	FALSE	FALSE	FALSE	0.023	0.083	0.91	0.93	-0.019	0.82	1	0.13	0.42
fat	II	FBgn0265190	PIG-S	42979	24.29	204.14	2.8e-06	0.58	5.6e-05	0.81	1.2	-0.11	TRUE	TRUE	FALSE	FALSE	2.1e-06	0.00011	0.0076	0.023	-0.54	1	1	0.22	0.51
fat	II	FBgn0265434	zip	38001	32.97	1943.39	0.00092	0.11	0.0056	0.41	0.22	-0.26	TRUE	FALSE	FALSE	FALSE	0.0029	0.02	0.38	0.5	-0.05	0.19	0.72	0.86	0.93
fat	II	FBgn0086265	psd	33830	27.81	102.04	5.1e-05	0.35	0.00056	0.65	2.3	-0.34	TRUE	TRUE	FALSE	FALSE	0.00029	0.0037	0.3	0.42	-0.45	1	1	1	1
fat	II	FBgn0035510	Cpr64Aa	38508	31.56	0.41	8.5e-08	0.83	4.4e-06		0.96	-0.031	TRUE	FALSE	FALSE	FALSE	0.25	0.42	1.7e-06	3.3e-05	0.77	0.17	0.69	0.66
fat	II	FBgn0029924	CG4586	31641	25.61	644.96	0.0001	0.3	0.00097	0.62	2.3	-0.4	TRUE	TRUE	FALSE	FALSE	0.00021	0.003	0.13	0.22	-0.75	1	1	0.11	0.4
fat	II	FBgn0037377	CG1218	40718	26.85	325.44	2.3e-05	0.44	0.00031	0.71	0.86	-0.26	TRUE	FALSE	FALSE	FALSE	0.0015	0.012	0.72	0.8	0.056	0.98	1	0.21	0.51
fat	II	FBgn0000427	dec-1	31691	30.51	3013.31	0.00055	0.17	0.0038	0.49	2.9	-0.51	TRUE	TRUE	FALSE	FALSE	0.001	0.0092	0.2	0.3	-0.93	1	1	0.76	0.89
fat	II	FBgn0004577	Pxd	2768671	30.47	4.51	1.7e-05	0.48	0.00024		0.42	-0.28	TRUE	FALSE	FALSE	FALSE	1.3e-05	0.0004	0.019	0.049	-0.18	0.99	1	0.25
fat	II	FBgn0033757	muskelin	36386	24.94	815.5	0.0026	0.083	0.013	0.35	1.7	-0.64	TRUE	FALSE	FALSE	FALSE	0.011	0.049	0.6	0.7	-0.25	0.98	1	0.032	0.27
fat	II	FBgn0262742	Fas1	42025	28.76	572.72	9.7e-05	0.34	0.00094	0.65	0.5	-0.2	TRUE	FALSE	FALSE	FALSE	0.0096	0.045	0.38	0.5	0.091	0.69	1	0.6	0.8
fat	II	FBgn0042206	GstD10	59240	28.6	32.5	0.0017	0.12	0.0095	0.42	0.56	-0.59	TRUE	FALSE	FALSE	FALSE	0.00098	0.0089	3.5e-08	1.6e-06	1.4	0.99	1	0.6	0.8
fat	II	FBgn0037330	mRpL44	40656	28.66	366.55	0.00095	0.17	0.0057	0.49	0.29	-0.25	TRUE	TRUE	FALSE	FALSE	1.6e-06	0.0001	1.3e-05	0.00014	-0.43	1	1	0.067	0.33
fat	II	FBgn0260985	RfC4	38492	26.11	245.46	0.00046	0.24	0.0033	0.56	1.8	-0.45	TRUE	TRUE	FALSE	FALSE	8.9e-06	0.0003	0.00034	0.0019	-1.8	1	1	0.022	0.25
fat	II	FBgn0011761	dhd	31444	29.96	8512.35	0.00011	0.37	0.0011	0.67	1.5	-0.34	TRUE	TRUE	FALSE	FALSE	0.00028	0.0036	0.16	0.26	-0.44	1	1	0.13	0.43
fat	II	FBgn0087040	alphaTub67C	39130	29.27	1537.52	0.00042	0.26	0.0031	0.58	1.9	-0.43	TRUE	TRUE	FALSE	FALSE	0.00048	0.0053	0.1	0.19	-0.76	1	1	0.14	0.43
fat	II	FBgn0003612	Su(var)2-10	35927	24.38	592.58	3.5e-08	0.92	2.3e-06	0.97	3.1	-0.033	TRUE	TRUE	FALSE	FALSE	3.5e-06	0.00015	0.89	0.92	-0.048	1	1	0.49	0.73
fat	II	FBgn0261987	Pxt	42131	30.69	1584.04	0.00033	0.28	0.0026	0.6	1.6	-0.41	TRUE	FALSE	FALSE	FALSE	0.045	0.13	0.18	0.28	0.51	0.92	1	0.21	0.5
fat	II	FBgn0034021	CG8180	36713	24.86	859.95	0.00054	0.24	0.0037	0.57	2.8	-0.43	TRUE	TRUE	FALSE	FALSE	0.0038	0.024	0.62	0.72	-0.33	1	1	0.021	0.24
fat	II	FBgn0041188	Atx2	41883	28.62	1037.08	0.0065	0.072	0.026	0.33	0.43	-0.32	TRUE	FALSE	FALSE	FALSE	0.32	0.5	0.12	0.21	0.23	0.25	0.8	0.6	0.8
fat	II	FBgn0051928	CG31928	326175	23.53	53.93	0.0067	0.073	0.027	0.33	1.4	-0.62	TRUE	FALSE	FALSE	FALSE	0.025	0.089	0.7	0.78	-0.17	0.96	1	1	1
fat	II	FBgn0029113	Uba2	44496	30.1	1112.79	0.00051	0.26	0.0036	0.58	0.36	-0.32	TRUE	FALSE	FALSE	FALSE	0.0041	0.025	0.68	0.76	-0.036	0.68	1	0.031	0.27
fat	II	FBgn0038307	mRpS10		26.04	278.66	0.017	0.036	0.055	0.22	2.2	-0.58	TRUE	FALSE	FALSE	FALSE	0.03	0.1	0.48	0.59	-0.61	0.97	1	0.003	0.095
fat	II	FBgn0001233	Hsp83	38389	35.41	27268.1	7e-05	0.47	0.00072	0.74	0.26	-0.14	TRUE	FALSE	TRUE	FALSE	0.004	0.025	0.63	0.72	0.025	0.071	0.48	0.097	0.38
fat	II	FBgn0000358	Cp19	39000	30.87	914.55	0.019	0.037	0.059	0.22	1.4	-0.69	TRUE	TRUE	FALSE	FALSE	4.4e-06	0.00018	3.5e-06	5.4e-05	-3.6	1	1	0.97	0.99
fat	II	FBgn0027524	CG3909	41226	27.14	357.32	0.024	0.03	0.071	0.2	0.41	-0.37	TRUE	FALSE	FALSE	FALSE	0.88	0.93	0.037	0.082	0.37	0.1	0.56	0.011	0.18
fat	II	FBgn0034908	CG5543	37768	23.81	268.53	0.0071	0.089	0.028	0.36	0.65	-0.51	TRUE	FALSE	FALSE	FALSE	0.024	0.086	0.66	0.75	-0.096	0.9	1	0.038	0.28
fat	II	FBgn0029568	CG11381	31067	26.46	121.3	0.0019	0.18	0.01	0.51	1.5	-0.37	TRUE	TRUE	FALSE	FALSE	3.2e-08	8.2e-06	2.3e-08	1.1e-06	-4	1	1	0.26	0.55
fat	II	FBgn0263979	Caf1-55	41836	29.85	819.81	0.0027	0.16	0.013	0.47	0.36	-0.47	TRUE	FALSE	FALSE	FALSE	0.084	0.2	0.38	0.5	0.092	0.31	0.87	0.03	0.26
fat	II	FBgn0001225	Hsp26	39075	31.61	2154.27	3.9e-05	0.58	0.00046	0.8	1.2	-0.22	TRUE	TRUE	FALSE	FALSE	0.00041	0.0047	0.49	0.6	-0.16	1	1	0.18	0.47
fat	II	FBgn0037580	DppIII	40996	33.45	3396.14	0.0027	0.17	0.014	0.49	0.25	-0.27	TRUE	FALSE	FALSE	FALSE	0.027	0.094	0.95	0.96	0.0047	0.17	0.69	0.037	0.28
fat	II	FBgn0004584	Rrp1	33500	24.11	370.12	4.9e-05	0.57	0.00054	0.8	1.1	-0.22	TRUE	FALSE	FALSE	FALSE	0.0063	0.034	0.36	0.47	0.2	0.97	1	0.15	0.44
fat	II	FBgn0003983	Vm34Ca	34758	30.2	204.17	0.00058	0.32	0.0039	0.63	0.95	-0.36	TRUE	TRUE	FALSE	FALSE	0.00079	0.0077	0.14	0.24	-0.35	1	1	0.93	0.97
fat	II	FBgn0010438	mtSSB	41968	28.63	281.31	0.0021	0.2	0.011	0.52	0.3	-0.46	TRUE	TRUE	FALSE	FALSE	7e-07	5.5e-05	1.7e-06	3.3e-05	-0.59	1	1	0.019	0.24
fat	II	FBgn0036889	CG14100	40132	24.4	244.96	0.0068	0.11	0.027	0.39	0.57	-0.44	TRUE	FALSE	FALSE	FALSE	0.0031	0.021	0.091	0.17	-0.33	0.98	1	0.016	0.22
fat	II	FBgn0036451	CG9425	39613	24.33	1586.6	0.026	0.039	0.075	0.23	0.96	-0.34	TRUE	FALSE	FALSE	FALSE	0.068	0.17	0.75	0.82	-0.13	0.9	1	0.68	0.85
fat	II	FBgn0020261	pcm	32935	25.64	822.99	0.0086	0.097	0.032	0.38	0.53	-0.32	TRUE	FALSE	FALSE	FALSE	0.11	0.25	0.57	0.67	0.11	0.63	1	0.0061	0.14
fat	II	FBgn0051973	Cda5	33158	25.74	355.57	0.015	0.066	0.05	0.31	0.37	-0.5	TRUE	FALSE	TRUE	FALSE	0.7	0.82	0.046	0.097	0.3	0.097	0.55	0.31	0.6
fat	II	FBgn0031542	CG15414	33570	27.12	8.48	0.00022	0.44	0.0018	0.71	0.48	-0.31	TRUE	FALSE	TRUE	FALSE	0.41	0.59	0.003	0.011	0.36	0.078	0.5	0.56	0.78
fat	II	FBgn0030834	CG8675	32716	24.35	565.52	0.014	0.078	0.046	0.34	0.62	-0.39	TRUE	FALSE	FALSE	FALSE	0.004	0.025	0.068	0.13	-0.44	0.98	1	0.14	0.43
fat	II	FBgn0031769	CG9135	33850	28.19	554.81	4.1e-05	0.63	0.00047	0.83	1.5	-0.2	TRUE	TRUE	FALSE	FALSE	0.0001	0.0018	0.12	0.2	-0.46	1	1	0.2	0.49
fat	II	FBgn0005777	PpD3	49779	29.41	594.29	4.2e-05	0.63	0.00048	0.83	0.48	-0.12	TRUE	FALSE	TRUE	FALSE	0.88	0.93	6.5e-05	0.00052	0.46	0.0099	0.21	0.37	0.64
fat	II	FBgn0039125	Ndc1	42825	24.64	272.83	0.014	0.082	0.047	0.35	1.5	-0.49	TRUE	FALSE	FALSE	FALSE	0.024	0.085	0.44	0.56	-0.43	0.97	1	0.011	0.18
fat	II	FBgn0020392	Nmt	38909	30.23	1032.26	0.00065	0.36	0.0043	0.66	0.36	-0.23	TRUE	FALSE	FALSE	FALSE	0.0077	0.039	0.9	0.93	-0.011	0.61	1	0.045	0.3
fat	II	FBgn0259212	cno	40620	24.76	2032.69	0.009	0.12	0.033	0.41	0.48	-0.23	TRUE	FALSE	FALSE	FALSE	0.024	0.086	0.58	0.68	-0.092	0.83	1	0.52	0.75
fat	II	FBgn0020633	Mcm7	39014	25.83	618.73	0.00022	0.5	0.0018	0.75	2.1	-0.28	TRUE	TRUE	FALSE	FALSE	0.0033	0.022	0.86	0.91	-0.078	0.99	1	0.07	0.34
fat	II	FBgn0038788	Sirt2	42414	25.77	442.7	0.013	0.099	0.044	0.38	0.57	-0.29	TRUE	FALSE	FALSE	FALSE	0.02	0.075	0.4	0.52	-0.18	0.91	1	0.054	0.31
fat	II	FBgn0026083	tyf	31363	27.34	2464.1	0.017	0.08	0.055	0.35	0.53	-0.39	TRUE	FALSE	FALSE	FALSE	0.0022	0.016	0.026	0.061	-0.49	0.99	1	0.2	0.5
fat	II	FBgn0265268	CG18234	40024	26.78	0.71	0.00044	0.43	0.0032		0.56	-0.2	TRUE	FALSE	FALSE	FALSE	0.0087	0.042	0.9	0.93	0.017	0.85	1	0.14
fat	II	FBgn0086443	AsnRS	35194	31.13	2296.9	9.1e-07	0.9	2.4e-05	0.96	0.4	-0.022	TRUE	FALSE	FALSE	FALSE	0.0033	0.022	0.02	0.051	0.14	0.15	0.66	0.21	0.51
fat	II	FBgn0039306	RIOK2	43046	23.84	701.31	0.00065	0.41	0.0043	0.69	1.1	-0.12	TRUE	FALSE	FALSE	FALSE	0.49	0.65	0.0059	0.019	0.8	0.41	0.95	0.43	0.68
fat	II	FBgn0038972	CG7054	42643	28.86	217.22	0.00054	0.43	0.0037	0.71	0.36	-0.2	TRUE	FALSE	FALSE	FALSE	0.14	0.28	5.4e-06	7.5e-05	0.54	0.11	0.57	0.21	0.51
fat	II	FBgn0030344	Nrd1	32143	29.04	476.8	0.0048	0.2	0.021	0.52	0.23	-0.21	TRUE	FALSE	TRUE	FALSE	0.19	0.35	7.1e-05	0.00055	0.36	0.028	0.32	0.23	0.53
fat	II	FBgn0036299	Tsf2	39435	28.98	688.44	0.016	0.1	0.051	0.38	0.22	-0.22	TRUE	FALSE	FALSE	FALSE	0.068	0.17	0.94	0.96	-0.0063	0.17	0.68	0.42	0.67
fat	II	FBgn0039877	Mccc1	43750	31.07	956.97	0.021	0.085	0.064	0.35	0.23	-0.21	TRUE	FALSE	FALSE	FALSE	0.0007	0.0071	1.6e-07	5.4e-06	0.75	0.91	1	0.07	0.34
fat	II	FBgn0030318	rho-4	32109	25.7	315.77	0.0024	0.28	0.012	0.6	0.54	-0.17	TRUE	FALSE	FALSE	FALSE	0.001	0.0092	0.06	0.12	-0.31	0.98	1	0.33	0.61
fat	II	FBgn0038989	CG6937	42662	26.69	680	0.023	0.086	0.067	0.36	1.5	-0.55	TRUE	FALSE	FALSE	FALSE	0.052	0.15	0.66	0.75	-0.26	0.94	1	0.0065	0.14
fat	II	FBgn0003447	sn	31717	24.24	204.8	0.00095	0.4	0.0057	0.68	1.5	-0.34	TRUE	TRUE	FALSE	FALSE	0.0013	0.011	0.17	0.27	-0.55	1	1	0.13	0.42
fat	II	FBgn0014466	Cp7Fc	31786	24.47	105.96	0.0072	0.18	0.028	0.5	1.3	-0.44	TRUE	TRUE	FALSE	FALSE	2.2e-05	0.00059	9e-05	0.00066	-2.2	1	1	0.18	0.48
fat	II	FBgn0036301	CG4069	39437	26.95	261.66	0.00021	0.57	0.0018	0.8	0.76	-0.18	TRUE	TRUE	FALSE	FALSE	3.2e-07	3.6e-05	3.9e-06	5.8e-05	-1.1	1	1	0.024	0.25
fat	II	FBgn0027088	GlyRS	39644	31.76	1371.46	0.0016	0.35	0.0087	0.66	0.28	-0.17	TRUE	FALSE	TRUE	FALSE	0.26	0.44	0.05	0.1	0.16	0.025	0.31	0.02	0.24
fat	II	FBgn0015245	Hsp60A	32045	34.87	8054.32	0.00039	0.51	0.0029	0.76	0.37	-0.14	TRUE	FALSE	FALSE	FALSE	0.00075	0.0074	0.18	0.28	-0.12	0.88	1	0.12	0.41
fat	II	FBgn0031051	Ranbp21	32970	25.73	1154.25	0.0025	0.31	0.012	0.62	1.1	-0.22	TRUE	TRUE	FALSE	FALSE	0.00019	0.0027	0.006	0.019	-1	1	1	0.075	0.35
fat	II	FBgn0004419	me31B	34364	32.43	3752.37	3.2e-05	0.76	0.0004	0.9	0.91	-0.12	TRUE	TRUE	FALSE	FALSE	2.7e-06	0.00013	0.00081	0.0038	-0.67	1	1	0.26	0.55
fat	II	FBgn0033342	CCT8	35882	32.24	2590.27	0.0038	0.27	0.017	0.59	0.36	-0.3	TRUE	FALSE	FALSE	FALSE	0.00034	0.0041	0.0091	0.027	-0.32	0.98	1	0.049	0.3
fat	II	FBgn0005655	PCNA	37290	28.12	368.92	0.00014	0.64	0.0013	0.84	2.2	-0.18	TRUE	TRUE	FALSE	FALSE	0.0006	0.0062	0.3	0.41	-0.5	1	1	0.22	0.52
fat	II	FBgn0035424	CG11505	38399	26.86	1452.79	0.0026	0.32	0.013	0.63	0.61	-0.18	TRUE	FALSE	FALSE	FALSE	0.16	0.31	0.17	0.27	0.25	0.53	1	0.67	0.85
fat	II	FBgn0259937	Nop60B	37873	30.85	2793.61	0.017	0.13	0.055	0.43	0.37	-0.52	TRUE	FALSE	FALSE	FALSE	0.0029	0.02	0.038	0.083	-0.31	0.95	1	0.017	0.22
fat	II	FBgn0002534	Lcp3	35819	24.18	0.23	6.4e-05	0.72	0.00067		2.5	-0.048	TRUE	FALSE	FALSE	FALSE	0.55	0.7	0.00041	0.0022	2.1	0.54	1	0.38
fat	II	FBgn0030025	CG2147	31759	24.58	226.46	0.0026	0.33	0.013	0.64	1.7	-0.17	TRUE	FALSE	FALSE	FALSE	0.014	0.06	0.74	0.81	-0.17	0.98	1	0.062	0.33
fat	II	FBgn0011604	Iswi	36390	25.58	604.69	0.003	0.32	0.015	0.63	0.44	-0.34	TRUE	FALSE	FALSE	FALSE	0.29	0.46	0.076	0.15	0.24	0.22	0.77	0.12	0.41
fat	II	FBgn0040078	pont	53439	29.91	619.66	0.0099	0.19	0.036	0.51	0.27	-0.37	TRUE	TRUE	FALSE	FALSE	2.3e-06	0.00012	2.5e-06	4.3e-05	-0.64	1	1	0.016	0.22
fat	II	FBgn0266717	Bruce	41260	26.23	9022.77	0.016	0.15	0.052	0.46	0.52	-0.23	TRUE	FALSE	FALSE	FALSE	0.0036	0.023	8.4e-07	2e-05	1.4	0.98	1	0.86	0.94
fat	II	FBgn0002542	lds	45894	24.15	755.31	0.0073	0.23	0.029	0.56	1.5	-0.48	TRUE	FALSE	FALSE	FALSE	0.033	0.11	0.81	0.87	-0.12	0.96	1	0.04	0.28
fat	II	FBgn0035402	Usp5	38375	31.51	1589.74	0.011	0.19	0.038	0.52	0.21	-0.22	TRUE	FALSE	TRUE	FALSE	0.75	0.85	0.028	0.066	0.18	0.0044	0.17	0.11	0.4
fat	II	FBgn0027512	CG10254	42793	24.28	2350.67	0.031	0.1	0.086	0.38	1.1	-0.63	TRUE	TRUE	FALSE	FALSE	2.7e-06	0.00013	1.1e-06	2.4e-05	-3.4	1	1	0.065	0.33
fat	II	FBgn0003257	r-l	42493	29.36	471.37	0.027	0.12	0.077	0.41	0.26	-0.53	TRUE	FALSE	FALSE	FALSE	0.00024	0.0032	0.00071	0.0034	-0.45	0.99	1	0.012	0.19
fat	II	FBgn0038673	CG14286	42280	25.37	93.79	0.00064	0.54	0.0043	0.78	0.98	-0.18	TRUE	FALSE	FALSE	FALSE	0.1	0.23	0.11	0.19	0.4	0.76	1	0.13	0.42
fat	II	FBgn0011726	tsr	37841	33.38	3654.61	0.0013	0.46	0.0074	0.73	0.28	-0.19	TRUE	FALSE	TRUE	FALSE	0.81	0.89	0.0028	0.01	0.26	0.004	0.16	0.27	0.56
fat	II	FBgn0037632	CCT7	41054	32.64	1550.75	0.00022	0.66	0.0018	0.85	0.4	-0.11	TRUE	FALSE	FALSE	FALSE	0.00044	0.005	0.16	0.26	-0.13	0.93	1	0.049	0.3
fat	II	FBgn0021847	l(2)k14710	48387	26.96	933.41	0.024	0.13	0.07	0.44	0.75	-0.22	TRUE	FALSE	FALSE	FALSE	0.29	0.47	0.00084	0.0039	1.2	0.61	1	0.09	0.37
fat	II	FBgn0038234	mRpL11	41757	27.18	159.73	0.007	0.27	0.028	0.59	0.36	-0.25	TRUE	FALSE	FALSE	FALSE	0.0038	0.024	0.11	0.2	-0.2	0.89	1	0.023	0.25
fat	II	FBgn0033571	Rpb5	36160	27.47	310.14	0.0052	0.31	0.022	0.63	0.42	-0.19	TRUE	TRUE	FALSE	FALSE	5e-05	0.0011	0.00041	0.0022	-0.57	1	1	0.081	0.35
fat	II	FBgn0028692	Rpn2	43449	33.02	3740.3	0.0027	0.39	0.013	0.68	0.22	-0.11	TRUE	FALSE	FALSE	FALSE	0.017	0.069	0.82	0.88	-0.014	0.13	0.62	0.78	0.89
fat	II	FBgn0038805	TFAM	42433	30.1	545.85	3.9e-05	0.82	0.00046	0.92	0.57	-0.049	TRUE	FALSE	FALSE	FALSE	0.00045	0.0051	0.53	0.64	-0.067	0.97	1	0.13	0.42
fat	II	FBgn0029882	CG3226	31597	30.49	638.45	0.00011	0.75	0.001	0.89	0.62	-0.11	TRUE	FALSE	FALSE	FALSE	0.011	0.051	0.35	0.47	0.12	0.81	1	0.21	0.5
fat	II	FBgn0262601	SmB	34426	28.95	482.33	0.0077	0.28	0.03	0.6	0.31	-0.31	TRUE	FALSE	FALSE	FALSE	0.0086	0.042	0.26	0.37	-0.12	0.73	1	0.066	0.33
fat	II	FBgn0004913	Gnf1	40607	26.11	846.53	0.0018	0.47	0.0096	0.73	0.99	-0.24	TRUE	TRUE	FALSE	FALSE	7.7e-06	0.00027	7.3e-05	0.00057	-1.4	1	1	0.083	0.36
fat	II	FBgn0030056	CG11284	31804	25.8	1129.48	0.00062	0.61	0.0041	0.82	1.4	-0.12	TRUE	FALSE	FALSE	FALSE	0.022	0.081	0.56	0.66	0.21	0.96	1	0.45	0.7
fat	II	FBgn0032242	CG5355	34421	32.7	1618.59	0.003	0.42	0.015	0.7	0.22	-0.14	TRUE	FALSE	TRUE	FALSE	0.35	0.52	0.00015	0.001	0.31	0.0069	0.19	0.36	0.64
fat	II	FBgn0034065	Rrp42	36766	25.43	161.61	0.031	0.14	0.086	0.45	0.35	-0.37	TRUE	FALSE	FALSE	FALSE	0.43	0.61	0.24	0.35	0.18	0.22	0.76	0.025	0.25
fat	II	FBgn0039869	CG1890	43737	26.75	390.82	0.0032	0.42	0.015	0.7	0.48	-0.24	TRUE	FALSE	FALSE	FALSE	0.0092	0.044	0.48	0.59	-0.1	0.88	1	0.045	0.3
fat	II	FBgn0266570	NO66	31374	28.78	1178.45	0.011	0.28	0.038	0.6	0.37	-0.36	TRUE	TRUE	FALSE	FALSE	5.5e-05	0.0011	0.00023	0.0014	-0.6	1	1	0.042	0.29
fat	II	FBgn0037958	CG6962	41436	24.08	207.3	0.0063	0.35	0.026	0.65	1.9	-0.31	TRUE	FALSE	FALSE	FALSE	0.024	0.087	0.71	0.78	-0.24	0.97	1	0.12	0.41
fat	II	FBgn0020279	lig	35771	30	2751.16	0.0078	0.33	0.03	0.64	0.24	-0.13	TRUE	FALSE	TRUE	FALSE	0.65	0.78	0.03	0.069	0.19	0.011	0.23	0.31	0.6
fat	II	FBgn0004587	B52	41670	30.35	1453.93	0.022	0.2	0.065	0.53	0.25	-0.23	TRUE	FALSE	FALSE	FALSE	0.022	0.082	0.32	0.44	-0.1	0.52	1	0.012	0.19
fat	II	FBgn0000054	Adf1	47082	25.04	361.09	0.012	0.28	0.042	0.6	0.69	-0.23	TRUE	FALSE	FALSE	FALSE	0.85	0.91	0.0068	0.021	0.76	0.22	0.76	0.55	0.77
fat	II	FBgn0262716	Arp3	38898	29.31	840.16	0.018	0.23	0.058	0.56	0.29	-0.22	TRUE	FALSE	FALSE	FALSE	0.0098	0.046	0.15	0.25	-0.17	0.77	1	0.19	0.49
fat	II	FBgn0037755	CG12945	41204	23.11	641.39	0.015	0.26	0.048	0.59	1.3	-0.19	TRUE	FALSE	FALSE	FALSE	0.49	0.65	0.11	0.19	0.84	0.59	1	0.23	0.52
fat	II	FBgn0003887	betaTub56D	37238	35.62	7539.6	0.0045	0.42	0.02	0.7	0.15	-0.22	TRUE	FALSE	TRUE	FALSE	0.046	0.14	0.83	0.88	0.011	0.0044	0.17	0.057	0.32
fat	II	FBgn0027873	Cpsf100	43426	24.65	418.76	0.004	0.45	0.018	0.72	0.73	-0.13	TRUE	FALSE	FALSE	FALSE	0.013	0.057	0.58	0.68	-0.12	0.94	1	0.095	0.38
fat	II	FBgn0040075	rept	40092	28.75	387.64	0.0079	0.36	0.03	0.66	0.48	-0.3	TRUE	TRUE	FALSE	FALSE	0.00017	0.0026	0.0016	0.0066	-0.6	1	1	0.046	0.3
fat	II	FBgn0266420	Ote	37090	28.11	334.46	0.003	0.49	0.015	0.75	0.58	-0.27	TRUE	FALSE	TRUE	FALSE	0.96	0.98	0.0025	0.0095	0.59	0.092	0.54	0.2	0.5
fat	II	FBgn0031267	Ipk2	33236	23.39	275.38	0.025	0.22	0.072	0.54	1.4	-0.35	TRUE	FALSE	FALSE	FALSE	0.059	0.16	0.69	0.77	-0.24	0.94	1	0.051	0.31
fat	II	FBgn0010741	Pfdn2	46121	29.63	801.87	0.00024	0.77	0.0019	0.9	0.62	-0.054	TRUE	FALSE	FALSE	FALSE	0.038	0.12	0.17	0.27	0.19	0.67	1	0.064	0.33
fat	II	FBgn0037621	M1BP	41042	23.5	415.44	0.00026	0.77	0.0021	0.9	2.3	-0.055	TRUE	TRUE	FALSE	FALSE	0.00032	0.0039	0.097	0.18	-0.89	1	1	0.15	0.44
fat	II	FBgn0031229	CG3436	33180	26.47	454.64	0.0019	0.57	0.0099	0.8	0.57	-0.15	TRUE	FALSE	FALSE	FALSE	0.085	0.2	0.3	0.41	0.17	0.61	1	0.24	0.53
fat	II	FBgn0003979	Vm26Aa	33829	25.8	303.23	0.0093	0.37	0.034	0.67	2	-0.33	TRUE	FALSE	FALSE	FALSE	0.3	0.48	0.18	0.28	0.95	0.76	1	0.81	0.91
fat	II	FBgn0027378	MRG15	41850	25.61	377.43	0.016	0.29	0.052	0.61	0.44	-0.2	TRUE	FALSE	FALSE	FALSE	0.23	0.4	0.37	0.49	0.15	0.42	0.95	0.063	0.33
fat	II	FBgn0001226	Hsp27	39078	31.11	452.87	0.0012	0.63	0.0071	0.83	1.3	-0.19	TRUE	TRUE	FALSE	FALSE	0.00085	0.008	0.084	0.16	-0.6	1	1	0.38	0.65
fat	II	FBgn0262737	mub	40436	26.66	899.88	0.0016	0.6	0.0087	0.82	0.53	-0.13	TRUE	TRUE	FALSE	FALSE	0.00014	0.0023	0.0061	0.019	-0.44	1	1	0.85	0.93
fat	II	FBgn0011606	Klp3A	31240	24.26	450.56	0.01	0.36	0.037	0.66	1.4	-0.38	TRUE	FALSE	FALSE	FALSE	0.0099	0.046	0.24	0.35	-0.6	0.99	1	0.12	0.4
fat	II	FBgn0262736	Vha16-1	44307	27.97	7592.95	0.031	0.21	0.086	0.53	0.69	-0.21	TRUE	FALSE	FALSE	FALSE	0.1	0.23	0.00016	0.001	1.4	0.81	1	0.69	0.85
fat	II	FBgn0038826	Syp	42460	24.91	2426.72	3.2e-06	0.97	6.3e-05	0.99	2.6	-0.0099	TRUE	TRUE	FALSE	FALSE	0.00055	0.0058	0.47	0.58	0.28	1	1	0.22	0.52
fat	II	FBgn0263510	nclb	36150	28.69	764.95	0.018	0.29	0.057	0.61	0.27	-0.2	TRUE	FALSE	TRUE	FALSE	0.81	0.89	0.036	0.08	0.24	0.027	0.31	0.14	0.44
fat	II	FBgn0032329	Art8	34528	26.62	142.67	2.8e-05	0.92	0.00035	0.97	0.71	-0.029	TRUE	TRUE	FALSE	FALSE	0.00013	0.0021	0.22	0.32	-0.16	1	1	0.2	0.5
fat	II	FBgn0039873	Smvt	43744	27.33	1075.61	0.011	0.36	0.04	0.66	0.67	-0.33	TRUE	FALSE	FALSE	FALSE	0.016	0.064	0.35	0.47	-0.23	0.94	1	0.87	0.94
fat	II	FBgn0030268	Klp10A	32049	26.61	1070.7	0.019	0.29	0.058	0.61	0.4	-0.33	TRUE	FALSE	FALSE	FALSE	0.053	0.15	0.73	0.81	-0.054	0.7	1	0.094	0.38
fat	II	FBgn0086909	CG31751	35118	28.28	629.78	0.00053	0.75	0.0037	0.89	0.53	-0.066	TRUE	FALSE	FALSE	FALSE	0.41	0.59	4.2e-05	0.00036	0.67	0.14	0.65	0.18	0.47
fat	II	FBgn0038965	mats	42634	25.77	474.89	0.019	0.3	0.059	0.62	0.55	-0.18	TRUE	FALSE	FALSE	FALSE	0.16	0.31	0.00021	0.0013	0.99	0.63	1	0.47	0.71
fat	II	FBgn0266284	Ns3	31097	26.85	818.94	0.021	0.3	0.064	0.62	0.42	-0.19	TRUE	FALSE	FALSE	FALSE	0.0049	0.028	0.058	0.12	-0.34	0.95	1	0.052	0.31
fat	II	FBgn0004889	tws	47877	29.19	963.15	0.0063	0.48	0.025	0.74	0.28	-0.17	TRUE	FALSE	TRUE	FALSE	0.65	0.78	0.0015	0.0064	0.34	0.02	0.28	0.74	0.88
fat	II	FBgn0014879	Set	41844	28.23	512.41	0.00085	0.73	0.0053	0.88	0.51	-0.12	TRUE	FALSE	FALSE	FALSE	0.27	0.45	0.027	0.063	0.31	0.23	0.77	0.15	0.44
fat	II	FBgn0035207	Herc4	38151	26.39	1666.06	0.014	0.38	0.047	0.67	0.38	-0.12	TRUE	FALSE	FALSE	FALSE	0.021	0.08	0.41	0.52	-0.12	0.79	1	0.96	0.98
fat	II	FBgn0034403	CG18190	37179	25.61	221.55	0.00085	0.74	0.0053	0.89	2.3	-0.13	TRUE	FALSE	FALSE	FALSE	0.068	0.17	0.22	0.33	0.72	0.93	1	0.29	0.58
fat	II	FBgn0014029	Sep2	42438	25.94	828.43	0.035	0.27	0.094	0.59	0.54	-0.2	TRUE	FALSE	FALSE	FALSE	0.87	0.92	0.022	0.053	0.6	0.21	0.74	0.062	0.33
fat	II	FBgn0037669	Ibf2	41102	24.96	129.09	0.039	0.26	0.1	0.58	0.44	-0.39	TRUE	FALSE	FALSE	FALSE	0.55	0.7	0.19	0.29	0.27	0.27	0.83	0.053	0.31
fat	II	FBgn0033761	CG8778	36392	30.51	652.42	0.0011	0.75	0.0064	0.89	0.4	-0.057	TRUE	FALSE	FALSE	FALSE	0.14	0.28	1e-05	0.00012	0.63	0.22	0.76	0.058	0.32
fat	II	FBgn0034936	CG2970	37807	30.6	710.72	8e-05	0.92	0.00081	0.97	0.39	-0.015	TRUE	FALSE	FALSE	FALSE	0.00048	0.0053	0.36	0.48	-0.072	0.87	1	0.38	0.65
fat	II	FBgn0000043	Act42A	35526	27.13	977.9	0.033	0.31	0.09	0.63	0.89	-0.35	TRUE	FALSE	FALSE	FALSE	0.12	0.26	1	1	0.00052	0.84	1	0.16	0.45
fat	II	FBgn0002736	mago	37402	26.76	459.81	0.00011	0.92	0.001	0.97	0.7	-0.026	TRUE	FALSE	FALSE	FALSE	0.084	0.2	0.03	0.068	0.34	0.55	1	0.19	0.49
fat	II	FBgn0015513	mbc	42817	25.07	2917.01	0.038	0.31	0.099	0.63	0.41	-0.17	TRUE	FALSE	FALSE	FALSE	0.1	0.23	0.0002	0.0012	0.86	0.66	1	0.51	0.74
fat	II	FBgn0039110	RanBP3	42804	27.35	621.59	0.0077	0.57	0.03	0.8	0.43	-0.15	TRUE	FALSE	FALSE	FALSE	0.015	0.061	0.43	0.54	-0.12	0.84	1	0.14	0.43
fat	II	FBgn0027526	Ublcp1	42726	25.66	435.96	0.02	0.44	0.06	0.71	0.41	-0.16	TRUE	FALSE	FALSE	FALSE	0.3	0.48	0.3	0.42	0.17	0.34	0.9	0.17	0.46
fat	II	FBgn0051453	pch2	41013	26.08	377.37	0.0017	0.77	0.0092	0.9	2.1	-0.11	TRUE	TRUE	FALSE	FALSE	0.00067	0.0068	0.048	0.1	-1.2	1	1	0.17	0.46
fat	II	FBgn0037624	CG8223	41045	28.94	1219.05	0.011	0.53	0.039	0.78	0.39	-0.2	TRUE	FALSE	FALSE	FALSE	0.052	0.15	0.91	0.94	-0.016	0.63	1	0.17	0.46
fat	II	FBgn0259223	CG42323	32825	29.66	4.03	0.01	0.56	0.037		0.57	-0.23	TRUE	FALSE	FALSE	FALSE	0.002	0.015	2.9e-07	8.4e-06	1.6	0.99	1	0.37
fat	II	FBgn0037894	Ranbp9	41367	29.27	1062.03	0.0082	0.6	0.031	0.82	0.23	-0.11	TRUE	FALSE	FALSE	FALSE	0.042	0.13	0.9	0.93	-0.0097	0.18	0.71	0.076	0.35
fat	II	FBgn0031940	CG7214	34053	33.46	8.55	0.0007	0.86	0.0045	0.94	0.72	-0.068	TRUE	FALSE	FALSE	FALSE	0.032	0.11	8.5e-07	2e-05	1.3	0.83	1	0.32	0.6
fat	II	FBgn0001987	Gli	34927	26.17	496.7	0.03	0.41	0.083	0.7	0.33	-0.13	TRUE	FALSE	FALSE	FALSE	0.44	0.62	0.0028	0.01	0.49	0.18	0.71	0.68	0.85
fat	II	FBgn0043002	Chrac-14	3772329	23.33	109.29	0.017	0.51	0.055	0.76	1.3	-0.26	TRUE	FALSE	FALSE	FALSE	0.0053	0.03	0.079	0.15	-0.91	0.99	1	0.081	0.35
fat	II	FBgn0036908	TORIP	40158	27.46	257.27	0.022	0.48	0.065	0.74	0.29	-0.18	TRUE	FALSE	FALSE	FALSE	0.063	0.17	0.78	0.84	-0.033	0.45	0.97	0.55	0.76
fat	II	FBgn0028734	Fmr1	37528	29.33	837.05	0.0037	0.74	0.017	0.89	0.34	-0.075	TRUE	FALSE	FALSE	FALSE	0.00014	0.0023	0.0026	0.0098	-0.35	0.99	1	0.43	0.68
fat	II	FBgn0038111	CG46280	41603	26.35	642.07	0.0068	0.67	0.027	0.86	0.56	-0.09	TRUE	FALSE	FALSE	FALSE	0.43	0.6	0.00054	0.0028	0.78	0.31	0.87	0.52	0.75
fat	II	FBgn0003124	polo	40232	26.74	990.84	0.026	0.47	0.075	0.74	1.2	-0.27	TRUE	FALSE	FALSE	FALSE	0.041	0.13	0.5	0.61	-0.33	0.95	1	0.18	0.48
fat	II	FBgn0038343	Trissin	41890	23.81	3.14	0.015	0.57	0.05		1.6	-0.2	TRUE	FALSE	FALSE	FALSE	0.28	0.45	0.28	0.4	0.65	0.76	1	0.28
fat	II	FBgn0000183	BicD	35051	26.71	1357.15	0.015	0.58	0.048	0.8	0.48	-0.12	TRUE	FALSE	FALSE	FALSE	0.0046	0.027	0.077	0.15	-0.33	0.96	1	0.67	0.84
fat	II	FBgn0036678	CG11905	39895	24.88	6.34	0.0039	0.76	0.018		1	-0.11	TRUE	FALSE	FALSE	FALSE	0.41	0.58	0.048	0.1	0.65	0.52	1	0.46
fat	II	FBgn0052423	shep	38605	27.35	1348.84	0.022	0.54	0.066	0.78	0.3	-0.13	TRUE	FALSE	FALSE	FALSE	0.21	0.38	0.51	0.62	0.079	0.24	0.79	0.29	0.58
fat	II	FBgn0044452	Atg2	38344	24.12	7569.56	0.024	0.53	0.07	0.78	1	-0.16	TRUE	FALSE	FALSE	FALSE	0.12	0.26	0.86	0.91	0.072	0.84	1	0.29	0.57
fat	II	FBgn0264848	vih	44118	25.37	255.86	0.0039	0.78	0.018	0.91	1.4	-0.1	TRUE	TRUE	FALSE	FALSE	0.0024	0.017	0.11	0.19	-0.69	1	1	0.37	0.64
fat	II	FBgn0039519	Cyp6a18	43304	23.09	292.03	0.037	0.48	0.097	0.74	1.3	-0.24	TRUE	FALSE	FALSE	FALSE	0.0097	0.045	0.081	0.15	-1.1	0.99	1	0.88	0.95
fat	II	FBgn0037087	CG7519	40377	27.7	250.69	0.0026	0.83	0.013	0.93	0.45	-0.037	TRUE	FALSE	FALSE	FALSE	0.13	0.28	0.22	0.33	0.16	0.39	0.94	0.53	0.76
fat	II	FBgn0003256	rl	3354888	28.39	2159.31	0.017	0.63	0.055	0.83	0.32	-0.11	TRUE	FALSE	FALSE	FALSE	0.0022	0.016	0.025	0.06	-0.3	0.94	1	0.81	0.91
fat	II	FBgn0027571	FASN1	33524	38.98	334955	0.009	0.72	0.033	0.88	0.15	-0.11	TRUE	FALSE	FALSE	FALSE	0.00028	0.0037	3.2e-08	1.5e-06	0.47	0.42	0.95	0.96	0.98
fat	II	FBgn0000212	brm	39744	24.94	565.43	0.03	0.55	0.083	0.79	0.63	-0.12	TRUE	FALSE	FALSE	FALSE	0.037	0.12	0.42	0.53	-0.22	0.9	1	0.73	0.87
fat	II	FBgn0005355	Su(fu)	41565	26.31	521.72	0.031	0.55	0.084	0.79	0.29	-0.1	TRUE	FALSE	TRUE	FALSE	0.92	0.95	0.041	0.089	0.27	0.04	0.37	0.29	0.58
fat	II	FBgn0038206	twf	41719	28.77	429.86	0.00038	0.95	0.0028	0.98	0.4	-0.011	TRUE	FALSE	FALSE	FALSE	0.083	0.2	0.091	0.17	0.16	0.22	0.77	0.74	0.88
fat	II	FBgn0051249	CG31249	42129	24.56	145.97	0.014	0.69	0.048	0.87	1.1	-0.12	TRUE	FALSE	FALSE	FALSE	0.0046	0.027	0.078	0.15	-0.74	0.99	1	0.21	0.5
fat	II	FBgn0051363	Jupiter	41392	27.08	492.94	0.002	0.89	0.01	0.96	0.37	-0.035	TRUE	FALSE	FALSE	FALSE	0.003	0.021	0.24	0.35	-0.12	0.85	1	0.87	0.94
fat	II	FBgn0031633	Fnta	33682	27.89	553.36	0.025	0.63	0.073	0.83	0.36	-0.073	TRUE	FALSE	FALSE	FALSE	0.026	0.092	0.33	0.45	-0.14	0.78	1	0.79	0.9
fat	II	FBgn0050069	CG30069	36573	31.97	5628.37	0.027	0.62	0.078	0.82	0.18	-0.12	TRUE	FALSE	TRUE	FALSE	0.12	0.26	0.00019	0.0012	0.35	0.059	0.45	0.18	0.48
fat	II	FBgn0031711	CG6907	33775	28.23	516.68	0.0046	0.84	0.02	0.93	0.6	-0.041	TRUE	FALSE	FALSE	FALSE	0.36	0.54	0.00026	0.0015	0.84	0.36	0.91	0.29	0.58
fat	II	FBgn0030343	ATP7	32142	25.4	1681.35	0.033	0.59	0.09	0.81	1.6	-0.077	TRUE	FALSE	FALSE	FALSE	0.33	0.51	0.38	0.5	0.62	0.74	1	0.97	0.99
fat	II	FBgn0250850	rig	37335	25.84	676.35	0.036	0.57	0.095	0.8	0.7	-0.2	TRUE	FALSE	FALSE	FALSE	0.058	0.16	0.56	0.66	-0.19	0.89	1	0.28	0.57
fat	II	FBgn0036579	CG5027	39775	24.38	322	0.0016	0.91	0.009	0.97	1.6	-0.022	TRUE	FALSE	FALSE	FALSE	0.73	0.84	0.00055	0.0028	1.8	0.42	0.95	0.85	0.93
fat	II	FBgn0263106	DnaJ-1	38643	28.69	3614.21	0.027	0.65	0.077	0.84	0.24	-0.13	TRUE	FALSE	FALSE	FALSE	0.012	0.052	0.14	0.23	-0.16	0.65	1	0.22	0.52
fat	II	FBgn0031231	mRpL10	33182	25.55	335.28	0.0046	0.87	0.02	0.95	0.61	-0.029	TRUE	FALSE	FALSE	FALSE	0.51	0.67	0.00056	0.0029	0.79	0.27	0.83	0.12	0.4
fat	II	FBgn0010288	Uch	33397	31.91	690.34	0.0014	0.94	0.0081	0.98	0.36	-0.024	TRUE	FALSE	TRUE	FALSE	0.26	0.43	4.1e-05	0.00036	0.51	0.092	0.54	0.35	0.62
fat	II	FBgn0034578	CG15653	37388	24.19	52.06	0.038	0.64	0.098	0.84	1.2	-0.15	TRUE	FALSE	FALSE	FALSE	0.55	0.71	0.0063	0.02	1.7	0.57	1	0.2	0.49
fat	II	FBgn0035907	GstO1	38975	28.35	261.05	0.019	0.78	0.058	0.91	0.33	-0.08	TRUE	FALSE	FALSE	FALSE	0.15	0.31	0.63	0.73	0.061	0.34	0.9	0.055	0.32
fat	II	FBgn0038474	mRpS11	42061	27.16	228.07	0.034	0.71	0.091	0.87	0.3	-0.097	TRUE	FALSE	FALSE	FALSE	0.032	0.11	0.34	0.45	-0.13	0.67	1	0.35	0.63
fat	II	FBgn0031012	CG8051	32925	26.61	740.15	0.0052	0.9	0.022	0.96	0.49	-0.032	TRUE	FALSE	FALSE	FALSE	0.81	0.89	0.0025	0.0093	0.54	0.1	0.56	0.49	0.73
fat	II	FBgn0038806	CG5412	42434	27.35	371.47	0.0049	0.91	0.021	0.97	0.51	-0.022	TRUE	FALSE	FALSE	FALSE	0.77	0.87	0.002	0.0077	0.58	0.12	0.6	0.17	0.46
fat	II	FBgn0027287	Gmap	32483	24.73	1264.35	0.017	0.85	0.055	0.94	0.52	-0.028	TRUE	FALSE	FALSE	FALSE	0.51	0.68	0.11	0.19	0.33	0.29	0.85	0.66	0.84
fat	II	FBgn0261437	CSN8	49077	26.47	214.2	0.036	0.78	0.095	0.91	1.1	-0.067	TRUE	FALSE	FALSE	FALSE	0.63	0.77	0.13	0.22	0.74	0.49	1	0.27	0.56
fat	II	FBgn0030336	CG1578	32135	29.38	1746.01	0.012	0.98	0.041	0.99	0.41	-0.0032	TRUE	FALSE	FALSE	FALSE	0.19	0.35	0.00017	0.0011	0.7	0.4	0.94	0.85	0.93
fat	II	FBgn0038723	CG6195	42343	28.26	745.86	0.022	1	0.067	1	0.34	-0.00062	TRUE	FALSE	FALSE	FALSE	0.55	0.71	0.0036	0.013	0.46	0.13	0.63	0.17	0.47
fat	II	FBgn0014464	Cp7Fa	3885650	27.51	258.53	0.0011		0.0065		1.5	-1.3	TRUE	TRUE	FALSE	FALSE	2e-05	0.00055	0.0005	0.0026	-1.6	1	1	0.25	0.54
fat	III	FBgn0033774	CG12374	36410	24.49	23035.1	2.1e-11	1.9e-13	1.4e-08	6.5e-11	-6.2	-2.9	FALSE	TRUE	FALSE	TRUE	2e-07	2.7e-05	0.0042	0.014	-1.4	1	1	4.4e-08	1.3e-05
fat	III	FBgn0033733	CG8834	36356	25.46	727.32	4.2e-08	3e-13	2.6e-06	9.4e-11	-7	-2.7	FALSE	TRUE	FALSE	TRUE	3.7e-07	4e-05	0.064	0.13	1.5	1	1	4.4e-08	1.3e-05
fat	III	FBgn0034406	Jheh3	37182	26.3	526.87	4.1e-07	1.8e-13	1.2e-05	6.3e-11	-4.5	-1.5	FALSE	TRUE	FALSE	TRUE	3.3e-05	0.00081	1	1	-0.00043	1	1	8.1e-06	0.0011
fat	III	FBgn0035665	Jon65Aiii	38683	24.91	3700.76	6.5e-07	1.5e-17	1.8e-05	1.1e-14	-3.5	-3.1	FALSE	TRUE	FALSE	TRUE	6.3e-05	0.0012	0.86	0.91	-0.081	1	1	6.2e-12	1e-08
fat	III	FBgn0250815	Jon65Aiv	38682	24.67	3804.09	0.0026	1.3e-19	0.013	1.7e-16	-2.3	-3.1	FALSE	FALSE	FALSE	TRUE	0.018	0.072	0.88	0.91	0.1	0.98	1	5.6e-12	1e-08
fat	III	FBgn0040060	yip7	38680	24.89	3378.05	1.6e-06	8.4e-13	3.8e-05	2.3e-10	-2.8	-2.8	FALSE	TRUE	FALSE	TRUE	1.4e-05	0.00042	0.2	0.3	0.53	1	1	7.8e-06	0.0011
fat	III	FBgn0033297	Mal-A8	35830	24.29	413.81	4.9e-06	3.7e-13	8.8e-05	1e-10	-2.9	-2.8	FALSE	TRUE	FALSE	TRUE	0.00018	0.0027	0.85	0.89	0.089	1	1	2.7e-10	1.3e-07
fat	III	FBgn0034468	Obp56a	37264	29.76	108.2	8.5e-12	5.6e-06	8.3e-09	0.00027	-1.8	-1.7	FALSE	FALSE	FALSE	FALSE	0.00023	0.0032	3.7e-08	1.7e-06	-1.1	0.99	1	0.38	0.65
fat	III	FBgn0050360	Mal-A6	246565	27.5	4582.02	0.00036	5.1e-15	0.0027	2.5e-12	-4.3	-3	FALSE	TRUE	FALSE	TRUE	6.1e-05	0.0012	0.0081	0.024	2.9	1	1	2.8e-13	8.9e-10
fat	III	FBgn0038740	CG4562	42362	24.16	516.78	6.1e-09	5.6e-08	6.9e-07	5.1e-06	-3.5	-2	FALSE	TRUE	FALSE	TRUE	6.2e-07	5.1e-05	0.77	0.83	0.1	1	1	0.0027	0.092
fat	III	FBgn0011834	Ser6	33073	24.2	161.62	5.3e-06	2.1e-11	9.6e-05	4.4e-09	-1.9	-2.3	FALSE	TRUE	FALSE	TRUE	3.1e-05	0.00077	0.17	0.27	0.42	1	1	7.1e-07	0.00015
fat	III	FBgn0003863	alphaTry	48316	23.63	8005.83	0.00029	1.9e-14	0.0023	8.5e-12	-2.3	-2.9	FALSE	TRUE	FALSE	TRUE	0.0037	0.024	0.83	0.88	0.11	0.99	1	8.3e-10	3.4e-07
fat	III	FBgn0036752	Adgf-A	39976	28.91	233.47	2.1e-05	3.7e-12	0.00029	9.2e-10	-0.62	-1.5	FALSE	FALSE	FALSE	TRUE	0.17	0.33	0.0016	0.0067	-0.4	0.22	0.76	0.00013	0.011
fat	III	FBgn0032373	Vha100-5	34587	23.97	375.55	8e-07	6.5e-10	2.2e-05	9e-08	-3.7	-2.1	FALSE	TRUE	FALSE	TRUE	0.00015	0.0023	0.55	0.66	-0.3	1	1	4.3e-06	0.00067
fat	III	FBgn0040256	Ugt86Dd	53507	25.43	347.38	9.6e-07	1.7e-09	2.5e-05	2.2e-07	-3.8	-1.2	FALSE	TRUE	FALSE	FALSE	3.3e-06	0.00015	0.049	0.1	1.1	1	1	0.28	0.57
fat	III	FBgn0038973	Pebp1	42644	28.44	228.01	2.5e-07	2.6e-08	9.1e-06	2.6e-06	-6.4	-2.1	FALSE	TRUE	FALSE	TRUE	3.8e-07	4e-05	0.0076	0.023	2.4	1	1	3.3e-05	0.0036
fat	III	FBgn0051004	mesh	43688	24.53	339.86	0.00056	1e-12	0.0038	2.7e-10	-2.8	-2	FALSE	TRUE	FALSE	TRUE	0.00013	0.0021	0.015	0.039	1.8	1	1	8.8e-05	0.0084
fat	III	FBgn0023197	Jon74E	39959	23.93	932.95	2.4e-08	1.6e-06	1.7e-06	9.2e-05	-4.6	-1.9	FALSE	TRUE	FALSE	TRUE	4.9e-07	4.7e-05	0.19	0.29	0.67	1	1	5e-07	0.00011
fat	III	FBgn0002570	Mal-A1	35824	28.52	4619.36	0.0049	3.5e-14	0.021	1.4e-11	-3.7	-2.8	FALSE	TRUE	FALSE	TRUE	0.00034	0.004	0.007	0.022	3.5	1	1	2e-11	2.4e-08
fat	III	FBgn0036766	CG5506	39992	24.28	583.94	0.0068	3.4e-14	0.027	1.4e-11	-1.9	-2.8	FALSE	TRUE	FALSE	TRUE	0.005	0.029	0.16	0.26	0.9	0.99	1	2.2e-06	0.00039
fat	III	FBgn0002569	Mal-A2	35825	23.94	184.81	8.3e-06	1.3e-08	0.00014	1.3e-06	-3.4	-2.1	FALSE	TRUE	FALSE	TRUE	0.00049	0.0053	0.87	0.91	-0.095	1	1	2.9e-06	0.00047
fat	III	FBgn0051104	CG31104	43054	25.17	96.9	0.00019	1.3e-10	0.0017	2.2e-08	-4	-2.5	FALSE	TRUE	FALSE	TRUE	0.00015	0.0023	0.048	0.1	1.8	1	1	2.1e-08	6.7e-06
fat	III	FBgn0038082	CG5724	41573	24.21	108.85	0.00017	1.8e-10	0.0015	3e-08	-2.5	-2.4	FALSE	FALSE	FALSE	TRUE	0.029	0.1	0.18	0.28	-0.74	0.96	1	8.7e-07	0.00018
fat	III	FBgn0051233	CG31233	42557	24.48	187.13	1.4e-07	1.3e-06	6.1e-06	7.9e-05	-4.9	-1.9	FALSE	TRUE	FALSE	TRUE	6.9e-06	0.00025	0.63	0.72	0.29	1	1	0.00086	0.047
fat	III	FBgn0039311	CG10513	43051	28.24	1366.83	4.5e-14	0.017	1.9e-10	0.14	-1.8	-0.8	FALSE	FALSE	FALSE	FALSE	0.00013	0.0022	2.8e-11	6.3e-09	-1.2	0.97	1	0.56	0.78
fat	III	FBgn0010246	Myo61F	38153	30.36	1348.46	2.1e-08	2.2e-05	1.6e-06	0.00089	-1.1	-0.96	FALSE	TRUE	FALSE	FALSE	6.1e-05	0.0012	0.043	0.091	-0.24	1	1	0.071	0.34
fat	III	FBgn0030775	CG9673	32649	24.61	107.34	0.00023	6.9e-09	0.0019	7.9e-07	-2.2	-2	FALSE	TRUE	FALSE	TRUE	0.0019	0.014	0.58	0.68	0.28	1	1	8.2e-05	0.008
fat	III	FBgn0033296	Mal-A7	35829	25.01	493.34	2.5e-05	2e-07	0.00032	1.6e-05	-3.6	-2	FALSE	TRUE	FALSE	TRUE	3e-06	0.00013	0.0012	0.0053	2.4	1	1	7.8e-11	4.4e-08
fat	III	FBgn0032775	CG17544	35213	25.81	617.57	2.7e-07	2.9e-05	9.5e-06	0.0012	-4.4	-1.1	FALSE	TRUE	FALSE	TRUE	4.7e-05	0.001	0.63	0.73	-0.26	1	1	0.00035	0.024
fat	III	FBgn0019643	AANAT1	37867	27.13	573.8	1.2e-06	1.6e-05	3.1e-05	0.00071	-1.3	-0.91	FALSE	TRUE	FALSE	FALSE	1.8e-06	0.0001	0.015	0.039	0.48	1	1	0.029	0.26
fat	III	FBgn0039316	CG11893	43056	26.56	128.1	4.3e-09	0.0015	5.3e-07	0.026	-3	-1.1	FALSE	TRUE	FALSE	FALSE	1e-07	1.7e-05	0.14	0.23	0.43	1	1	0.8	0.91
fat	III	FBgn0033593	Listericin	36183	27.15	85.92	3.1e-05	1.3e-06	0.00038	7.7e-05	-1.3	-1.6	FALSE	FALSE	FALSE	FALSE	0.91	0.95	2.2e-05	0.00022	-1.3	0.18	0.7	0.53	0.76
fat	III	FBgn0039310	CG11878	43050	27.39	308.78	1.3e-07	0.00024	5.5e-06	0.0063	-1.8	-1.1	FALSE	FALSE	FALSE	FALSE	0.07	0.18	2.1e-05	0.00021	-1.2	0.78	1	0.051	0.31
fat	III	FBgn0028491	CG2930	31341	25.62	983.01	4.6e-08	0.0011	2.8e-06	0.02	-1.7	-0.93	FALSE	TRUE	FALSE	FALSE	2.8e-05	0.0007	0.26	0.37	-0.22	1	1	0.055	0.32
fat	III	FBgn0034470	Obp56d	37266	31.61	467.55	1.9e-07	0.00057	7.4e-06	0.012	-0.93	-1.1	FALSE	FALSE	FALSE	FALSE	0.049	0.14	5.9e-05	0.00047	-0.59	0.49	1	0.95	0.98
fat	III	FBgn0261575	tobi	43072	30.01	5916.19	1.9e-06	0.00019	4.2e-05	0.0051	-1.6	-1.2	FALSE	TRUE	FALSE	FALSE	1.8e-06	0.0001	0.0095	0.028	0.68	1	1	0.092	0.37
fat	III	FBgn0000078	Amy-d	36932	26.9	2623.37	0.0067	8.6e-09	0.027	9.4e-07	-1.1	-2.1	FALSE	TRUE	FALSE	TRUE	1.1e-05	0.00036	3.7e-05	0.00033	1.9	1	1	7.8e-12	1.1e-08
fat	III	FBgn0000116	Argk	39041	35.79	5551.47	1.7e-09	0.016	2.7e-07	0.13	-0.7	-0.42	FALSE	FALSE	FALSE	FALSE	3.7e-05	0.00087	0.0023	0.0087	-0.22	0.94	1	0.74	0.88
fat	III	FBgn0033787	CG13321	36430	28.31	266.53	5.1e-05	1.7e-05	0.00056	0.00072	-0.75	-1.4	FALSE	TRUE	FALSE	TRUE	3.7e-05	0.00087	0.027	0.063	0.34	1	1	0.003	0.095
fat	III	FBgn0024315	Picot	36865	24.2	452.75	1.5e-07	0.0025	6.2e-06	0.037	-3.3	-0.81	FALSE	TRUE	FALSE	FALSE	1.5e-06	9.4e-05	0.12	0.2	0.65	1	1	0.3	0.59
fat	III	FBgn0034225	veil	36968	25.15	371.98	0.0073	2.4e-08	0.029	2.4e-06	-2	-1.7	FALSE	FALSE	FALSE	TRUE	0.33	0.51	0.12	0.21	-1.1	0.73	1	1.4e-05	0.0017
fat	III	FBgn0032286	CG7300	34472	27.86	320.49	5.9e-10	0.041	1.2e-07	0.24	-3.2	-0.65	FALSE	TRUE	FALSE	FALSE	0.0001	0.0018	8.8e-05	0.00065	-1.3	1	1	0.033	0.27
fat	III	FBgn0031689	Cyp28d1	33749	27.42	515.68	1.1e-07	0.0064	5.1e-06	0.073	-1.3	-0.79	FALSE	FALSE	FALSE	FALSE	0.0012	0.011	0.006	0.019	-0.48	0.98	1	0.15	0.44
fat	III	FBgn0051288	CG31288	318664	27.53	168.58	6.9e-05	6.8e-05	0.00071	0.0023	-0.86	-1.3	FALSE	TRUE	FALSE	FALSE	3.3e-05	0.0008	0.017	0.043	0.44	1	1	0.0038	0.11
fat	III	FBgn0037930	CG14715	41403	28.49	388.28	6.9e-05	9.7e-05	0.00071	0.0031	-0.55	-0.93	FALSE	FALSE	FALSE	FALSE	0.11	0.24	0.012	0.034	-0.3	0.28	0.84	0.61	0.8
fat	III	FBgn0260746	Ect3	41457	28.49	157.72	4.7e-05	0.00014	0.00053	0.0042	-0.52	-0.96	FALSE	FALSE	FALSE	FALSE	0.054	0.15	0.026	0.061	-0.24	0.35	0.9	0.0096	0.17
fat	III	FBgn0260960	Baldspot	39860	27.18	2276.79	2.1e-07	0.0081	7.9e-06	0.085	-1.4	-0.57	FALSE	TRUE	FALSE	FALSE	3.2e-05	0.00079	0.73	0.81	-0.061	1	1	0.82	0.92
fat	III	FBgn0014417	CG13397	46386	29.95	1519.66	1.2e-07	0.012	5.3e-06	0.11	-0.8	-0.54	FALSE	FALSE	TRUE	FALSE	0.25	0.43	2.4e-06	4.2e-05	-0.65	0.094	0.54	0.0024	0.087
fat	III	FBgn0039073	CG4408	42762	26.43	439.21	1.9e-05	0.0005	0.00026	0.011	-1	-0.57	FALSE	TRUE	FALSE	FALSE	0.0002	0.0029	0.43	0.55	0.14	1	1	0.15	0.44
fat	III	FBgn0259101	CG42249	32043	24.56	685.53	0.01	2.2e-07	0.036	1.7e-05	-1.6	-1.3	FALSE	FALSE	FALSE	TRUE	0.088	0.21	0.75	0.82	-0.18	0.91	1	0.00031	0.022
fat	III	FBgn0051248	CG31248	40853	28.6	214.56	1.5e-09	0.085	2.5e-07	0.35	-0.99	-0.5	FALSE	TRUE	FALSE	FALSE	1.5e-05	0.00044	0.0071	0.022	-0.26	1	1	0.35	0.63
fat	III	FBgn0032055	CG13091	34188	31.57	20164.9	8.4e-11	0.27	2.7e-08	0.59	-1.4	-0.31	FALSE	FALSE	FALSE	FALSE	0.00044	0.005	6.1e-07	1.5e-05	-0.76	0.96	1	0.26	0.55
fat	III	FBgn0042119	Cpr65Au	59158	30.83	324.7	0.001	4.4e-05	0.0062	0.0017	-0.92	-1	FALSE	FALSE	FALSE	FALSE	0.04	0.12	0.44	0.55	-0.19	0.88	1	0.15	0.44
fat	III	FBgn0032456	MRP	34686	31.19	2389.82	0.00028	0.0003	0.0022	0.0074	-0.21	-0.43	FALSE	FALSE	TRUE	FALSE	0.023	0.084	0.33	0.45	-0.047	0.0084	0.21	0.017	0.23
fat	III	FBgn0038135	CG8773	41634	23.09	305.8	0.0064	8e-06	0.026	0.00037	-2.1	-1.7	FALSE	FALSE	FALSE	TRUE	0.54	0.7	0.041	0.089	-1.5	0.61	1	0.00012	0.01
fat	III	FBgn0041711	yellow-e	41653	28.15	30.02	5.6e-06	0.0099	9.9e-05	0.097	-0.87	-1	FALSE	FALSE	FALSE	FALSE	0.067	0.17	0.002	0.0077	-0.49	0.57	1	0.045	0.3
fat	III	FBgn0026403	Ndg	36089	32.49	703.81	1e-06	0.029	2.7e-05	0.19	-0.41	-0.6	FALSE	FALSE	TRUE	FALSE	0.67	0.8	3.4e-07	9.5e-06	-0.45	0.00063	0.13	0.38	0.65
fat	III	FBgn0010038	GstD2	48335	23.32	38.35	0.0067	2.3e-05	0.027	0.00092	-2	-1.5	FALSE	FALSE	FALSE	FALSE	0.31	0.49	0.13	0.22	-1.1	0.75	1	0.07	0.34
fat	III	FBgn0261393	alpha-Est5	40905	30.21	547.57	4.8e-06	0.017	8.7e-05	0.14	-0.49	-0.37	FALSE	FALSE	FALSE	FALSE	0.00089	0.0083	0.41	0.53	-0.063	0.79	1	0.66	0.84
fat	III	FBgn0015039	Cyp9b2	35635	29.65	2091.82	9.8e-09	0.19	8.8e-07	0.52	-1.1	-0.34	FALSE	FALSE	FALSE	FALSE	0.0002	0.0028	0.0028	0.01	-0.38	0.99	1	0.48	0.72
fat	III	FBgn0035094	CG9380	38011	25.47	278.8	0.031	2.3e-06	0.084	0.00013	-1	-1.5	FALSE	FALSE	FALSE	FALSE	0.52	0.68	0.17	0.27	-0.62	0.54	1	0.017	0.22
fat	III	FBgn0031801	CG9498	33885	27.6	258.86	2.5e-07	0.077	9.1e-06	0.34	-1.5	-0.55	FALSE	FALSE	FALSE	FALSE	0.0046	0.027	0.0028	0.01	-0.64	0.97	1	0.16	0.45
fat	III	FBgn0033698	CG8858	36319	30.17	1535.8	3.5e-06	0.028	6.9e-05	0.19	-0.48	-0.31	FALSE	FALSE	TRUE	FALSE	0.84	0.9	6.3e-06	8.6e-05	-0.46	0.0032	0.15	0.49	0.73
fat	III	FBgn0034480	CG16898	37276	30.77	1376.73	5.3e-08	0.15	3.2e-06	0.47	-1	-0.42	FALSE	TRUE	FALSE	FALSE	7.6e-11	1.4e-07	5.9e-09	4.1e-07	1.2	1	1	0.95	0.98
fat	III	FBgn0029172	Fad2	44006	31.84	57750.9	7.7e-08	0.14	4.1e-06	0.45	-1.1	-0.38	FALSE	FALSE	FALSE	FALSE	0.069	0.17	1.2e-05	0.00014	-0.74	0.49	1	0.35	0.62
fat	III	FBgn0031143	CG1532	33076	30.77	813.05	8.2e-07	0.066	2.3e-05	0.31	-0.52	-0.29	FALSE	TRUE	FALSE	FALSE	3.6e-06	0.00015	0.066	0.13	0.14	1	1	0.43	0.68
fat	III	FBgn0050489	Cyp12d1-p	246648	28.64	859.84	0.00013	0.0047	0.0012	0.059	-0.53	-0.85	FALSE	TRUE	FALSE	FALSE	9.8e-08	1.7e-05	9.6e-07	2.2e-05	0.79	1	1	0.73	0.87
fat	III	FBgn0033205	CG2064	35708	29	452.94	9.1e-08	0.16	4.6e-06	0.47	-0.85	-0.39	FALSE	FALSE	TRUE	FALSE	0.51	0.67	4.7e-07	1.2e-05	-0.75	0.045	0.39	0.91	0.96
fat	III	FBgn0005666	bt	43814	35.9	5853.13	3.3e-07	0.11	1.1e-05	0.4	-0.54	-0.54	FALSE	FALSE	TRUE	FALSE	0.51	0.67	6.5e-08	2.5e-06	-0.6	0.0052	0.17	0.2	0.49
fat	III	FBgn0037200	CG11109	40507	25	240.63	2.4e-05	0.021	0.00031	0.16	-2.4	-0.45	FALSE	FALSE	FALSE	FALSE	0.34	0.52	0.00046	0.0024	-1.8	0.66	1	0.1	0.39
fat	III	FBgn0020370	TppII	36444	33.38	3017.87	6.3e-06	0.044	0.00011	0.25	-0.35	-0.32	FALSE	FALSE	TRUE	FALSE	0.14	0.28	0.00064	0.0032	-0.23	0.0053	0.17	0.03	0.26
fat	III	FBgn0034756	Cyp6d2	37594	27.62	945.66	3e-07	0.14	1e-05	0.45	-0.93	-0.44	FALSE	FALSE	FALSE	FALSE	0.012	0.052	0.00088	0.0041	-0.46	0.77	1	0.48	0.72
fat	III	FBgn0033763	CG8646	36394	26.94	50.74	9.5e-06	0.044	0.00016	0.25	-1.5	-0.64	FALSE	FALSE	FALSE	FALSE	0.17	0.33	0.00067	0.0033	-0.99	0.66	1	0.31	0.6
fat	III	FBgn0034145	CG5065	36860	23.62	262.39	3.2e-05	0.026	0.0004	0.18	-2.7	-0.77	FALSE	FALSE	FALSE	FALSE	0.0089	0.043	0.19	0.29	-0.66	0.99	1	0.72	0.87
fat	III	FBgn0037723	SpdS	41167	32.26	2611.55	3.5e-05	0.025	0.00042	0.18	-0.47	-0.54	FALSE	FALSE	FALSE	FALSE	0.00014	0.0023	0.2	0.3	0.12	0.97	1	0.74	0.88
fat	III	FBgn0035476	CG12766	38462	23.43	86.34	3.8e-07	0.17	1.2e-05	0.49	-2.5	-0.47	FALSE	TRUE	FALSE	FALSE	2.4e-06	0.00012	0.083	0.16	0.58	1	1	0.97	0.99
fat	III	FBgn0036975	CG5618	40241	29.68	1480.15	8.1e-09	0.42	8.2e-07	0.7	-1	-0.22	FALSE	FALSE	FALSE	FALSE	0.00082	0.0078	0.00028	0.0016	-0.45	0.94	1	0.34	0.62
fat	III	FBgn0020644	Lcp65Ab1	48381	26.44	0.23	4.1e-09	0.46	5.2e-07		-2	-0.099	FALSE	FALSE	FALSE	FALSE	0.93	0.96	3.4e-09	2.7e-07	-2	0.12	0.61	0.93
fat	III	FBgn0032652	CG6870	35067	25.07	1135.39	5.8e-06	0.073	0.0001	0.33	-1.9	-0.53	FALSE	FALSE	FALSE	FALSE	0.1	0.23	0.001	0.0046	-1.2	0.81	1	0.03	0.26
fat	III	FBgn0032727	CG10623	35153	29.75	736.34	0.0022	0.0023	0.011	0.035	-0.44	-0.56	FALSE	FALSE	TRUE	FALSE	0.94	0.97	0.0018	0.0071	-0.46	0.039	0.36	0.2	0.5
fat	III	FBgn0001230	Hsp68	42852	32.97	454.48	2.4e-06	0.14	5.1e-05	0.45	-0.55	-0.59	FALSE	FALSE	FALSE	FALSE	0.0091	0.044	0.015	0.04	-0.22	0.48	0.99	0.026	0.26
fat	III	FBgn0035926	CG5804	39005	27.15	73.73	0.03	9.3e-05	0.083	0.003	-2.5	-1.4	FALSE	FALSE	FALSE	FALSE	0.66	0.79	0.1	0.18	-1.9	0.59	1	0.38	0.65
fat	III	FBgn0030332	CG9360	32128	32.09	1003.9	4.9e-10	0.7	1.1e-07	0.87	-0.94	-0.095	FALSE	TRUE	FALSE	FALSE	2.9e-09	1.5e-06	0.0048	0.016	0.25	1	1	0.53	0.76
fat	III	FBgn0030089	AP-1gamma	31842	27.14	1068.09	8.4e-05	0.044	0.00084	0.25	-0.81	-0.33	FALSE	FALSE	FALSE	FALSE	0.083	0.2	0.024	0.057	-0.39	0.63	1	0.11	0.4
fat	III	FBgn0051198	CG31198	318622	26.87	1155.55	0.00014	0.034	0.0013	0.21	-1.2	-0.66	FALSE	FALSE	FALSE	FALSE	0.0049	0.028	0.77	0.84	-0.07	0.98	1	0.17	0.47
fat	III	FBgn0085400	side-V	37679	28.61	37.84	2.3e-07	0.35	8.6e-06	0.65	-0.95	-0.32	FALSE	FALSE	TRUE	FALSE	0.54	0.7	1.1e-06	2.4e-05	-0.85	0.084	0.51	0.24	0.54
fat	III	FBgn0024238	Fim	32721	30.7	953.62	1.7e-05	0.097	0.00025	0.38	-0.53	-0.4	FALSE	FALSE	FALSE	FALSE	0.0018	0.014	0.53	0.64	-0.058	0.84	1	0.12	0.41
fat	III	FBgn0040236	c11.1	53436	27.16	2464.76	1e-06	0.25	2.7e-05	0.58	-0.75	-0.23	FALSE	FALSE	FALSE	FALSE	0.28	0.46	2.2e-05	0.00022	-0.59	0.12	0.6	0.71	0.86
fat	III	FBgn0263397	Ih	36589	25.57	691.11	0.0019	0.0064	0.01	0.073	-1.3	-0.57	FALSE	FALSE	FALSE	FALSE	0.055	0.15	0.47	0.58	-0.27	0.91	1	0.12	0.41
fat	III	FBgn0021764	sdk	31017	26.46	1703.66	0.0032	0.0048	0.015	0.06	-1.1	-0.37	FALSE	FALSE	FALSE	FALSE	0.16	0.31	0.2	0.31	-0.42	0.76	1	0.05	0.3
fat	III	FBgn0029155	Men-b	43936	30.27	467.74	0.00015	0.046	0.0014	0.26	-0.41	-0.59	FALSE	FALSE	FALSE	FALSE	0.0063	0.034	4e-08	1.7e-06	-0.78	0.6	1	0.011	0.19
fat	III	FBgn0265048	cv-d	41921	29.41	2923.16	5.1e-10	0.81	1.1e-07	0.92	-1.3	-0.067	FALSE	TRUE	FALSE	FALSE	9.3e-10	6.7e-07	0.00036	0.002	0.49	1	1	0.49	0.73
fat	III	FBgn0037975	CG3397	41454	31.23	609.17	0.0032	0.0063	0.015	0.072	-0.42	-0.73	FALSE	TRUE	FALSE	FALSE	1.5e-06	9.5e-05	3.9e-06	5.8e-05	0.82	1	1	0.55	0.77
fat	III	FBgn0039325	CG10560	43065	26.78	324.41	0.00012	0.061	0.0011	0.3	-0.83	-0.61	FALSE	FALSE	FALSE	FALSE	0.78	0.87	0.00029	0.0017	-0.76	0.13	0.63	0.8	0.91
fat	III	FBgn0016123	Alp4	43671	27.21	1166.49	0.0097	0.0022	0.035	0.034	-1.2	-0.86	FALSE	FALSE	FALSE	FALSE	0.14	0.29	8.2e-05	0.00062	-2.1	0.83	1	0.18	0.47
fat	III	FBgn0033482	CG1371	36053	32.03	1642.86	0.01	0.0021	0.037	0.033	-0.2	-0.28	FALSE	FALSE	TRUE	FALSE	0.43	0.61	0.00087	0.004	-0.28	0.0092	0.21	0.86	0.94
fat	III	FBgn0039296	CG10420	43034	27.04	99.1	2.1e-05	0.15	0.00029	0.46	-0.79	-0.32	FALSE	FALSE	FALSE	FALSE	0.019	0.073	0.051	0.1	-0.29	0.79	1	0.4	0.66
fat	III	FBgn0004580	Cbp53E	36905	27.72	33.88	3.8e-05	0.12	0.00045	0.41	-1.1	-0.6	FALSE	TRUE	FALSE	FALSE	0.00068	0.0069	0.72	0.8	0.074	1	1	0.24	0.53
fat	III	FBgn0036566	ClC-c	39759	25.8	1636.91	0.00037	0.041	0.0028	0.24	-0.82	-0.3	FALSE	FALSE	FALSE	FALSE	0.0085	0.042	0.84	0.89	-0.037	0.94	1	0.67	0.84
fat	III	FBgn0261797	Dhc64C	38580	32.75	9244.97	0.00043	0.041	0.0031	0.24	-0.21	-0.34	FALSE	FALSE	TRUE	FALSE	0.91	0.95	0.0003	0.0017	-0.22	7.6e-05	0.089	0.33	0.61
fat	III	FBgn0039637	Ctl2	43440	24.54	1529.21	2.6e-05	0.15	0.00033	0.47	-2.3	-0.2	FALSE	FALSE	FALSE	FALSE	0.5	0.67	3.7e-06	5.7e-05	-2.7	0.53	1	0.86	0.93
fat	III	FBgn0034176	ste24a	36908	27.28	687.33	7.7e-05	0.1	0.00079	0.38	-1.4	-0.2	FALSE	FALSE	FALSE	FALSE	0.63	0.76	1.8e-05	0.00019	-1.6	0.35	0.9	0.1	0.39
fat	III	FBgn0004055	uzip	38002	28.49	416.06	1.5e-08	0.71	1.2e-06	0.87	-0.76	-0.068	FALSE	FALSE	FALSE	FALSE	0.023	0.083	7.1e-06	9.6e-05	-0.49	0.27	0.83	0.52	0.75
fat	III	FBgn0034629	Acox57D-d	37446	30.39	3028.25	4.8e-07	0.47	1.4e-05	0.74	-0.83	-0.18	FALSE	FALSE	FALSE	FALSE	0.00052	0.0056	0.1	0.18	-0.19	0.97	1	0.81	0.91
fat	III	FBgn0003328	scb	36692	25.85	677.71	2.8e-06	0.34	5.6e-05	0.65	-1	-0.18	FALSE	FALSE	FALSE	FALSE	0.00065	0.0066	0.37	0.49	-0.14	0.99	1	0.11	0.39
fat	III	FBgn0250836	CG8628	38783	25.05	3.31	4e-06	0.32	7.4e-05		-4	-0.35	FALSE	FALSE	FALSE	FALSE	0.014	0.06	0.014	0.037	-1.7	0.98	1	0.86
fat	III	FBgn0038964	Nop56	42633	31.41	1882.54	0.0016	0.024	0.0087	0.17	-0.29	-0.59	FALSE	FALSE	FALSE	FALSE	7.3e-05	0.0014	2.6e-09	2.1e-07	-0.87	0.97	1	0.0062	0.14
fat	III	FBgn0086906	sls	44013	35.45	157548	0.00019	0.089	0.0016	0.36	-0.3	-0.51	FALSE	FALSE	TRUE	FALSE	0.55	0.71	3e-05	0.00028	-0.35	0.0025	0.14	0.56	0.77
fat	III	FBgn0038722	Nup58	42342	26.7	126.42	3.4e-06	0.4	6.6e-05	0.69	-0.74	-0.27	FALSE	FALSE	FALSE	FALSE	0.095	0.22	0.00061	0.003	-0.46	0.35	0.9	0.073	0.34
fat	III	FBgn0052214	CG32214	317919	25.64	0.51	3.7e-07	0.6	1.2e-05		-4.4	-0.09	FALSE	FALSE	FALSE	FALSE	0.87	0.92	5.7e-07	1.5e-05	-4.3	0.4	0.94	0.79
fat	III	FBgn0266580	Gp210	35512	29.76	1346.27	0.0002	0.13	0.0017	0.43	-0.37	-0.38	FALSE	FALSE	FALSE	FALSE	0.072	0.18	8.8e-07	2.1e-05	-0.58	0.13	0.63	0.081	0.35
fat	III	FBgn0051092	LpR2	43105	30.25	21958.3	3.9e-05	0.26	0.00046	0.58	-0.53	-0.29	FALSE	FALSE	FALSE	FALSE	0.1	0.23	3.6e-07	9.8e-06	-0.77	0.24	0.79	0.38	0.65
fat	III	FBgn0032026	CG7627	34148	28.33	2486.24	0.011	0.012	0.038	0.11	-0.27	-0.78	FALSE	FALSE	TRUE	FALSE	0.45	0.62	0.00096	0.0044	-0.37	0.044	0.39	0.013	0.2
fat	III	FBgn0039120	Nup98-96	42816	29.18	1819.5	0.00076	0.096	0.0048	0.37	-0.33	-0.38	FALSE	FALSE	TRUE	FALSE	0.36	0.54	4.2e-05	0.00037	-0.43	0.028	0.32	0.09	0.37
fat	III	FBgn0263598	Vha68-2	45012	34.73	4197.11	0.002	0.061	0.01	0.3	-0.23	-0.22	FALSE	FALSE	TRUE	FALSE	0.57	0.72	0.012	0.033	-0.18	0.0026	0.14	0.35	0.63
fat	III	FBgn0051674	CG31674	318878	27.47	154.78	0.0059	0.029	0.024	0.19	-0.46	-0.41	FALSE	FALSE	FALSE	FALSE	0.39	0.56	0.077	0.15	-0.28	0.23	0.78	0.11	0.4
fat	III	FBgn0020908	Scp1	3355102	33.24	69.87	0.00078	0.11	0.0049	0.4	-0.83	-0.64	FALSE	TRUE	FALSE	FALSE	7.6e-05	0.0014	0.0052	0.017	0.65	1	1	0.0015	0.066
fat	III	FBgn0041194	Prat2	38753	33.12	9211.8	0.0024	0.061	0.012	0.3	-0.41	-0.53	FALSE	FALSE	FALSE	FALSE	0.036	0.12	0.74	0.81	-0.04	0.58	1	0.21	0.5
fat	III	FBgn0030686	mRpL3	32523	28.37	367.31	0.00065	0.13	0.0043	0.43	-0.29	-0.32	FALSE	FALSE	FALSE	FALSE	0.046	0.14	1.3e-06	2.7e-05	-0.5	0.1	0.56	0.019	0.24
fat	III	FBgn0011286	RyR	49090	30.64	1660.03	5e-06	0.56	9.1e-05	0.8	-0.36	-0.19	FALSE	FALSE	TRUE	FALSE	0.89	0.93	7.6e-06	0.0001	-0.35	0.0003	0.089	0.52	0.75
fat	III	FBgn0037327	PEK	40653	25.92	1338.07	0.0027	0.077	0.013	0.34	-2.8	-0.33	FALSE	FALSE	FALSE	FALSE	0.029	0.1	0.9	0.93	-0.1	0.97	1	0.032	0.27
fat	III	FBgn0037186	CG11241	40492	28.92	971.76	9.7e-06	0.53	0.00016	0.78	-0.6	-0.16	FALSE	TRUE	FALSE	FALSE	4.5e-05	0.001	0.16	0.25	0.15	1	1	0.44	0.69
fat	III	FBgn0261479	nero	43740	28.3	540.94	0.0006	0.17	0.0041	0.49	-0.49	-0.37	FALSE	FALSE	FALSE	FALSE	0.1	0.23	0.097	0.18	-0.21	0.37	0.92	0.018	0.23
fat	III	FBgn0058160	CG40160	3354965	26.64	870.55	2.6e-06	0.64	5.4e-05	0.84	-1	-0.1	FALSE	TRUE	FALSE	FALSE	1e-05	0.00033	0.085	0.16	0.28	1	1	0.38	0.65
fat	III	FBgn0027330	l(1)G0020	31811	27.5	479.34	0.0023	0.091	0.012	0.36	-1	-0.48	FALSE	FALSE	FALSE	FALSE	0.86	0.92	0.0039	0.013	-0.97	0.26	0.82	0.014	0.2
fat	III	FBgn0037815	Rrp46	41270	27.65	86.05	0.00087	0.15	0.0054	0.46	-0.68	-0.45	FALSE	FALSE	FALSE	FALSE	0.73	0.84	0.00029	0.0017	-0.76	0.15	0.66	0.081	0.35
fat	III	FBgn0011230	poe	46243	29.73	16391.8	0.018	0.02	0.056	0.15	-0.21	-0.36	FALSE	FALSE	TRUE	FALSE	0.83	0.9	0.033	0.074	-0.19	0.0061	0.18	0.39	0.66
fat	III	FBgn0015393	hoip	44173	32.14	1244.79	0.009	0.039	0.033	0.23	-0.3	-0.69	FALSE	FALSE	FALSE	FALSE	0.014	0.058	2.6e-06	4.4e-05	-0.71	0.66	1	0.0023	0.085
fat	III	FBgn0037998	Cog1	41479	23.81	831.92	4.9e-06	0.62	8.8e-05	0.83	-1.6	-0.075	FALSE	FALSE	FALSE	FALSE	0.0061	0.033	0.054	0.11	-0.52	0.98	1	0.4	0.66
fat	III	FBgn0259108	futsch	5740544	27.71	217.83	0.0057	0.059	0.024	0.29	-0.38	-0.75	FALSE	FALSE	TRUE	FALSE	0.97	0.98	0.005	0.017	-0.38	0.033	0.34	0.38	0.65
fat	III	FBgn0011581	Ms	44324	28.83	38.92	0.013	0.035	0.044	0.22	-0.62	-0.66	FALSE	FALSE	FALSE	FALSE	0.41	0.58	0.13	0.22	-0.35	0.41	0.95	0.44	0.69
fat	III	FBgn0024509	Sec13	44437	30.12	1173.38	1.7e-06	0.73	3.8e-05	0.89	-0.59	-0.079	FALSE	FALSE	FALSE	FALSE	0.0042	0.026	0.029	0.066	-0.2	0.67	1	0.3	0.59
fat	III	FBgn0052029	Cpr66D	38990	26.29	19.42	0.0023	0.12	0.012	0.41	-0.61	-0.61	FALSE	FALSE	FALSE	FALSE	0.0038	0.024	1.8e-07	5.7e-06	-1.4	0.96	1	0.58	0.79
fat	III	FBgn0051809	CG31809	318954	23.56	56.61	0.00046	0.24	0.0033	0.57	-2.3	-0.43	FALSE	FALSE	FALSE	FALSE	0.011	0.05	0.79	0.85	-0.15	0.99	1	0.83	0.92
fat	III	FBgn0000032	Acph-1	48445	28.63	469.79	0.0039	0.091	0.018	0.37	-0.41	-0.43	FALSE	FALSE	FALSE	FALSE	0.073	0.18	1.2e-05	0.00014	-0.74	0.47	0.99	0.092	0.37
fat	III	FBgn0038484	CG5246	42072	27.2	8362.83	3.4e-05	0.5	0.00041	0.76	-1.7	-0.23	FALSE	TRUE	FALSE	FALSE	0.00095	0.0086	0.93	0.95	0.03	1	1	0.96	0.98
fat	III	FBgn0035280	Cpr62Bb	38240	32.99	18.59	0.00074	0.22	0.0047	0.54	-0.6	-0.5	FALSE	FALSE	FALSE	FALSE	0.0096	0.045	0.97	0.98	0.0049	0.89	1	0.3	0.59
fat	III	FBgn0052732	CG32732	31638	26.94	481.87	0.023	0.025	0.069	0.18	-0.48	-0.4	FALSE	FALSE	FALSE	FALSE	0.92	0.95	0.017	0.044	-0.51	0.13	0.63	0.024	0.25
fat	III	FBgn0026315	Ugt35a	41334	25.88	191.42	0.00023	0.33	0.0019	0.64	-0.63	-0.21	FALSE	FALSE	FALSE	FALSE	0.0046	0.027	0.99	0.99	-0.0025	0.92	1	0.076	0.35
fat	III	FBgn0033557	CG12325	36144	23.82	432.58	0.0081	0.065	0.031	0.31	-1	-0.39	FALSE	FALSE	FALSE	FALSE	0.25	0.42	0.21	0.32	-0.43	0.68	1	0.013	0.2
fat	III	FBgn0028381	Decay	42008	23.35	94.81	0.021	0.031	0.063	0.2	-1.7	-0.68	FALSE	FALSE	FALSE	FALSE	0.13	0.27	0.79	0.85	-0.18	0.88	1	0.13	0.43
fat	III	FBgn0013997	Nrx-IV	39387	29.65	947.2	0.0042	0.1	0.019	0.39	-0.23	-0.19	FALSE	FALSE	TRUE	FALSE	0.89	0.93	0.0027	0.0099	-0.24	0.0017	0.13	0.78	0.9
fat	III	FBgn0004885	tok	42944	23.76	5224.3	7.9e-06	0.67	0.00013	0.86	-2.5	-0.098	FALSE	TRUE	FALSE	FALSE	0.0034	0.022	0.17	0.26	-0.58	0.99	1	0.25	0.54
fat	III	FBgn0263236	SP1029	53473	28.8	422.75	0.017	0.042	0.055	0.24	-0.23	-0.44	FALSE	FALSE	TRUE	FALSE	0.97	0.98	0.016	0.041	-0.23	0.0069	0.19	0.022	0.25
fat	III	FBgn0044324	Chro	40508	28.59	907.62	0.00069	0.26	0.0045	0.59	-0.56	-0.35	FALSE	FALSE	FALSE	FALSE	0.013	0.055	0.85	0.89	-0.027	0.84	1	0.067	0.33
fat	III	FBgn0004552	Akh	38495	24.5	5.88	8.4e-05	0.48	0.00084		-2.5	-0.23	FALSE	FALSE	FALSE	FALSE	0.019	0.073	0.17	0.27	-0.71	0.97	1	0.91
fat	III	FBgn0038194	Cyp6d5	41706	30.89	5380.97	6.6e-07	0.85	1.9e-05	0.94	-0.62	-0.048	FALSE	FALSE	FALSE	FALSE	0.0044	0.026	0.0095	0.028	-0.24	0.64	1	0.086	0.36
fat	III	FBgn0026634	ldlCp	41870	25.81	509.67	0.0052	0.11	0.022	0.39	-2.6	-0.31	FALSE	FALSE	FALSE	FALSE	0.14	0.29	0.32	0.44	-0.83	0.88	1	0.1	0.39
fat	III	FBgn0026753	Vha13	42341	31.96	3109.07	0.009	0.074	0.033	0.33	-0.63	-0.25	FALSE	FALSE	FALSE	FALSE	0.16	0.32	0.4	0.51	-0.19	0.63	1	0.025	0.25
fat	III	FBgn0000565	Eip71CD	39675	27.99	3093.49	0.00043	0.32	0.0031	0.64	-0.54	-0.25	FALSE	FALSE	FALSE	FALSE	0.0029	0.02	0.58	0.68	0.07	0.93	1	0.079	0.35
fat	III	FBgn0037074	CG7324	40361	28.92	3168.21	0.0074	0.096	0.029	0.38	-0.19	-0.26	FALSE	FALSE	TRUE	FALSE	0.14	0.29	0.41	0.52	-0.054	0.02	0.28	0.37	0.65
fat	III	FBgn0039301	Nup37	43040	25.89	131.06	0.0029	0.17	0.014	0.49	-0.69	-0.5	FALSE	FALSE	FALSE	FALSE	0.95	0.97	0.0035	0.012	-0.67	0.14	0.63	0.017	0.22
fat	III	FBgn0001224	Hsp23	39077	26.31	62.89	0.014	0.064	0.047	0.31	-0.51	-0.73	FALSE	FALSE	FALSE	FALSE	4.7e-05	0.001	7.3e-09	4.6e-07	-1.9	1	1	0.3	0.59
fat	III	FBgn0028670	Vha100-2	42216	31.66	3641.4	0.0012	0.25	0.0069	0.58	-0.23	-0.17	FALSE	FALSE	TRUE	FALSE	0.19	0.35	1.9e-05	0.0002	-0.35	0.0093	0.21	0.073	0.34
fat	III	FBgn0261068	LSm7	35003	27.36	357.56	0.0004	0.37	0.003	0.67	-0.84	-0.21	FALSE	FALSE	FALSE	FALSE	0.57	0.72	0.0024	0.0091	-0.68	0.25	0.81	0.032	0.27
fat	III	FBgn0035612	frm	38624	28.98	9.91	0.0082	0.099	0.031	0.38	-0.3	-0.66	FALSE	FALSE	TRUE	FALSE	0.91	0.95	0.012	0.032	-0.29	0.019	0.28	0.84	0.93
fat	III	FBgn0032010	CG8086	34131	26.56	185.93	0.00028	0.41	0.0022	0.69	-0.65	-0.27	FALSE	FALSE	FALSE	FALSE	0.64	0.77	0.0013	0.0055	-0.56	0.13	0.62	0.48	0.72
fat	III	FBgn0015776	nrv1	33952	30.9	2132.25	1.8e-05	0.67	0.00026	0.86	-0.35	-0.07	FALSE	FALSE	TRUE	FALSE	0.79	0.88	8.3e-06	0.00011	-0.37	0.00083	0.13	0.92	0.96
fat	III	FBgn0037569	tex	40983	24.93	96.45	0.00034	0.4	0.0026	0.69	-1.1	-0.26	FALSE	FALSE	FALSE	FALSE	0.77	0.87	0.00084	0.0039	-0.99	0.25	0.81	0.059	0.32
fat	III	FBgn0051793	CG31793	326161	26.33	2205.74	5e-07	0.9	1.5e-05	0.96	-0.81	-0.027	FALSE	FALSE	FALSE	FALSE	0.00085	0.008	0.059	0.12	-0.21	0.95	1	0.7	0.86
fat	III	FBgn0250874	ttm50	31266	30.01	615.08	0.0011	0.29	0.0066	0.61	-0.39	-0.24	FALSE	FALSE	TRUE	FALSE	0.83	0.9	0.0023	0.0088	-0.36	0.022	0.29	0.056	0.32
fat	III	FBgn0263599	l(3)72Ab	39737	28.86	2252.82	0.0059	0.14	0.024	0.44	-0.34	-0.23	FALSE	FALSE	FALSE	FALSE	0.034	0.11	5.9e-06	8.1e-05	-0.69	0.53	1	0.22	0.52
fat	III	FBgn0003423	slgA	33117	29.61	726.63	0.019	0.063	0.059	0.31	-0.25	-0.63	FALSE	FALSE	FALSE	FALSE	0.029	0.1	1.4e-05	0.00015	-0.56	0.44	0.97	0.025	0.25
fat	III	FBgn0037290	CG1124	40613	25.45	161.32	0.0047	0.16	0.021	0.48	-0.55	-0.38	FALSE	FALSE	FALSE	FALSE	0.92	0.95	0.0034	0.012	-0.57	0.1	0.56	0.82	0.92
fat	III	FBgn0038585	Non3	42183	28.34	404	0.0021	0.23	0.011	0.56	-0.35	-0.3	FALSE	FALSE	FALSE	FALSE	0.00076	0.0075	3.1e-08	1.4e-06	-0.9	0.93	1	0.065	0.33
fat	III	FBgn0030102	SmydA-9	31859	29.71	309.29	0.00014	0.52	0.0013	0.77	-0.46	-0.19	FALSE	FALSE	TRUE	FALSE	0.44	0.61	0.0016	0.0066	-0.36	0.05	0.41	0.68	0.85
fat	III	FBgn0039004	Nup133	42680	26.74	482.12	0.0031	0.2	0.015	0.52	-0.75	-0.45	FALSE	FALSE	FALSE	FALSE	0.88	0.93	0.0019	0.0077	-0.8	0.18	0.71	0.091	0.37
fat	III	FBgn0034247	CG6484	36994	26.91	2091.09	0.0026	0.23	0.013	0.56	-0.86	-0.35	FALSE	TRUE	FALSE	FALSE	0.0012	0.01	0.067	0.13	0.48	0.99	1	0.28	0.57
fat	III	FBgn0261859	CG42788	41817	26.72	4993.19	2.4e-05	0.71	0.00032	0.88	-0.65	-0.084	FALSE	TRUE	FALSE	FALSE	2.4e-06	0.00012	0.00086	0.004	0.46	1	1	0.36	0.64
fat	III	FBgn0019938	RpI1	36617	29.12	1119.08	0.00086	0.38	0.0054	0.67	-1.3	-0.21	FALSE	FALSE	FALSE	FALSE	0.036	0.11	0.44	0.55	-0.25	0.93	1	0.18	0.48
fat	III	FBgn0003870	ttk	48317	23.53	862.68	0.00092	0.37	0.0056	0.67	-2.1	-0.14	FALSE	FALSE	FALSE	FALSE	0.076	0.19	0.21	0.31	-0.68	0.91	1	0.87	0.94
fat	III	FBgn0053519	Unc-89	3346201	33.67	2276.88	4.3e-05	0.69	0.00049	0.87	-0.41	-0.12	FALSE	FALSE	TRUE	FALSE	0.23	0.4	0.0019	0.0076	-0.28	0.037	0.36	0.65	0.83
fat	III	FBgn0051935	CG31935	33338	26.15	782.83	0.00011	0.62	0.001	0.83	-2.5	-0.075	FALSE	FALSE	FALSE	FALSE	0.11	0.24	9.3e-07	2.1e-05	-3.7	0.88	1	0.34	0.62
fat	III	FBgn0011771	Hem	40462	27.64	936.7	0.026	0.075	0.075	0.34	-0.32	-0.23	FALSE	FALSE	FALSE	FALSE	0.11	0.23	0.99	0.99	-0.0013	0.44	0.97	0.35	0.63
fat	III	FBgn0035524	CG11583	326206	27.65	304.21	0.0021	0.31	0.011	0.63	-0.43	-0.3	FALSE	FALSE	FALSE	FALSE	0.0054	0.03	2.4e-07	7.3e-06	-0.96	0.87	1	0.06	0.33
fat	III	FBgn0035121	Tudor-SN	38045	34.03	4106.06	0.0052	0.22	0.022	0.54	-0.17	-0.19	FALSE	FALSE	TRUE	FALSE	0.46	0.63	0.0005	0.0026	-0.23	0.00088	0.13	0.31	0.59
fat	III	FBgn0039207	CG5789	42928	28.71	3715.05	0.013	0.14	0.044	0.44	-0.28	-0.17	FALSE	FALSE	FALSE	FALSE	0.038	0.12	1.4e-05	0.00015	-0.61	0.46	0.98	0.4	0.67
fat	III	FBgn0035416	gry	38391	24.19	1300.89	0.017	0.12	0.054	0.42	-1.1	-0.15	FALSE	FALSE	FALSE	FALSE	0.29	0.46	0.29	0.41	-0.45	0.69	1	0.7	0.86
fat	III	FBgn0033600	Cpr47Ec	36191	24.44	0.2	0.005	0.24	0.021		-1	-0.16	FALSE	FALSE	FALSE	FALSE	0.029	0.099	4e-06	5.9e-05	-2.1	0.94	1	0.55
fat	III	FBgn0036656	CG13026	39868	24.41	0.9	1.3e-05	0.82	0.0002		-2.8	-0.06	FALSE	TRUE	FALSE	FALSE	0.0041	0.025	0.21	0.32	-0.61	0.99	1	0.74
fat	III	FBgn0035982	CG4461	39074	28.99	186.4	0.00087	0.45	0.0054	0.72	-0.46	-0.27	FALSE	FALSE	TRUE	FALSE	0.58	0.73	0.005	0.017	-0.37	0.073	0.48	0.34	0.62
fat	III	FBgn0036663	CG9674	39878	33.18	11416.3	0.0039	0.27	0.018	0.59	-0.17	-0.25	FALSE	FALSE	TRUE	FALSE	0.14	0.29	0.28	0.39	-0.059	0.0038	0.16	0.85	0.93
fat	III	FBgn0039229	Saf-B	42958	26.89	775.54	0.0036	0.29	0.017	0.6	-0.42	-0.19	FALSE	FALSE	FALSE	FALSE	0.094	0.22	1.7e-05	0.00018	-0.73	0.44	0.97	0.1	0.39
fat	III	FBgn0032454	CG5787	34684	27.98	460.84	0.014	0.15	0.046	0.46	-0.32	-0.37	FALSE	FALSE	TRUE	FALSE	0.65	0.78	0.0033	0.012	-0.4	0.068	0.47	0.11	0.4
fat	III	FBgn0260049	flr	39505	32.36	1459.29	0.024	0.1	0.07	0.39	-0.16	-0.31	FALSE	FALSE	TRUE	FALSE	0.2	0.36	0.57	0.67	-0.037	0.013	0.24	0.019	0.23
fat	III	FBgn0250823	gish	49701	28.36	854.81	4.1e-05	0.76	0.00047	0.9	-0.36	-0.077	FALSE	FALSE	TRUE	FALSE	0.2	0.36	0.0025	0.0095	-0.23	0.017	0.27	0.82	0.92
fat	III	FBgn0004924	Top1	32458	27.06	2072.57	0.0054	0.26	0.023	0.58	-0.44	-0.28	FALSE	FALSE	FALSE	FALSE	0.32	0.51	0.00023	0.0014	-0.63	0.23	0.78	0.18	0.47
fat	III	FBgn0030504	CG2691	32320	26.21	1828.32	0.028	0.1	0.08	0.39	-0.53	-0.27	FALSE	FALSE	FALSE	FALSE	0.58	0.73	0.13	0.22	-0.35	0.31	0.87	0.023	0.25
fat	III	FBgn0033631	Sod3	36232	28.42	705.32	0.023	0.12	0.069	0.42	-0.48	-0.55	FALSE	FALSE	FALSE	FALSE	0.073	0.18	6.7e-05	0.00053	-1	0.75	1	0.054	0.31
fat	III	FBgn0037973	CG18547	41452	30.7	604.95	0.035	0.093	0.093	0.37	-0.23	-0.42	FALSE	TRUE	FALSE	FALSE	8e-06	0.00028	4.5e-06	6.5e-05	0.66	1	1	0.51	0.74
fat	III	FBgn0033463	CG1513	36028	27.54	1184.14	0.033	0.1	0.089	0.38	-0.19	-0.18	FALSE	FALSE	FALSE	FALSE	0.025	0.089	2e-05	0.0002	-0.47	0.3	0.87	0.86	0.94
fat	III	FBgn0004656	fs(1)h	31722	26.19	2522.11	0.0012	0.47	0.0068	0.74	-0.72	-0.12	FALSE	FALSE	FALSE	FALSE	0.64	0.78	0.0051	0.017	-0.59	0.21	0.75	0.43	0.68
fat	III	FBgn0039594	CG9990	43391	26.4	1588.46	0.00015	0.7	0.0013	0.87	-1.3	-0.077	FALSE	FALSE	FALSE	FALSE	0.0079	0.04	0.57	0.67	-0.16	0.98	1	0.4	0.66
fat	III	FBgn0011725	twin	42880	25.41	1019.69	0.0034	0.35	0.016	0.66	-0.56	-0.26	FALSE	FALSE	FALSE	FALSE	0.06	0.16	7.9e-06	0.0001	-1	0.71	1	0.23	0.52
fat	III	FBgn0032880	TM9SF2	35335	24.73	1982.53	1.1e-05	0.88	0.00017	0.95	-1.8	-0.019	FALSE	FALSE	FALSE	FALSE	0.49	0.65	8.5e-05	0.00064	-1.5	0.45	0.97	0.29	0.58
fat	III	FBgn0262515	VhaAC45	35944	28.16	2401.95	0.0018	0.44	0.0095	0.71	-0.49	-0.13	FALSE	FALSE	FALSE	FALSE	0.00081	0.0078	0.059	0.12	0.27	0.98	1	0.4	0.66
fat	III	FBgn0264855	AP-2alpha	33211	31.02	1623.32	0.0024	0.4	0.012	0.69	-0.28	-0.13	FALSE	FALSE	TRUE	FALSE	0.39	0.56	0.035	0.078	-0.18	0.021	0.28	0.77	0.89
fat	III	FBgn0035335	mRpL23	38302	24.7	247.74	0.0062	0.29	0.025	0.61	-2	-0.22	FALSE	FALSE	FALSE	FALSE	0.22	0.39	0.00012	0.00084	-3.2	0.81	1	0.31	0.59
fat	III	FBgn0038652	CG7720	42257	25.54	2032.74	0.015	0.19	0.05	0.51	-0.64	-0.34	FALSE	FALSE	FALSE	FALSE	0.033	0.11	0.56	0.66	0.14	0.9	1	0.19	0.49
fat	III	FBgn0031449	CG31689	326154	28.16	2779.34	0.034	0.11	0.091	0.4	-0.47	-0.41	FALSE	FALSE	FALSE	FALSE	0.051	0.15	5.7e-05	0.00046	-1.1	0.81	1	0.96	0.98
fat	III	FBgn0262511	Vha44	36826	32.36	1363.04	0.0033	0.38	0.016	0.67	-0.24	-0.13	FALSE	FALSE	TRUE	FALSE	0.47	0.64	0.03	0.069	-0.17	0.0085	0.21	0.87	0.94
fat	III	FBgn0033737	Nup54	36360	27.09	425.46	0.036	0.11	0.094	0.41	-0.39	-0.52	FALSE	FALSE	FALSE	FALSE	0.26	0.43	0.54	0.65	-0.11	0.4	0.94	0.0088	0.17
fat	III	FBgn0039233	CG7006	42963	26.75	254.16	0.0057	0.32	0.024	0.63	-0.45	-0.25	FALSE	FALSE	FALSE	FALSE	0.55	0.71	0.035	0.078	-0.33	0.15	0.66	0.011	0.19
fat	III	FBgn0022069	Nnp-1	44391	29.73	709.25	0.0082	0.28	0.031	0.6	-0.66	-0.27	FALSE	FALSE	FALSE	FALSE	0.023	0.083	4.5e-06	6.5e-05	-1.4	0.91	1	0.086	0.36
fat	III	FBgn0033093	CG3270	35575	28.27	720.68	0.0039	0.38	0.018	0.67	-0.5	-0.25	FALSE	FALSE	FALSE	FALSE	0.62	0.76	0.00081	0.0038	-0.61	0.14	0.65	0.91	0.96
fat	III	FBgn0034999	CG3394	37887	26.06	897.71	0.013	0.24	0.044	0.56	-0.47	-0.27	FALSE	FALSE	FALSE	FALSE	0.55	0.71	0.002	0.0079	-0.61	0.21	0.76	0.23	0.53
fat	III	FBgn0038536	CG7655	42128	26.42	120.88	0.00015	0.75	0.0013	0.9	-0.9	-0.057	FALSE	FALSE	FALSE	FALSE	0.89	0.93	9.7e-05	0.00071	-0.94	0.13	0.63	0.22	0.51
fat	III	FBgn0033540	Elp2	36123	27.8	573.05	0.015	0.23	0.049	0.56	-0.33	-0.2	FALSE	FALSE	TRUE	FALSE	0.92	0.96	0.02	0.049	-0.32	0.04	0.37	0.64	0.82
fat	III	FBgn0031310	Vps29	33295	28.99	191.69	0.00018	0.75	0.0015	0.89	-0.46	-0.066	FALSE	FALSE	FALSE	FALSE	0.066	0.17	0.066	0.13	-0.19	0.3	0.86	0.62	0.81
fat	III	FBgn0033734	CG8520	36357	25.78	528.43	0.0015	0.54	0.0082	0.78	-1.2	-0.095	FALSE	FALSE	FALSE	FALSE	0.086	0.21	0.25	0.36	-0.38	0.85	1	0.33	0.61
fat	III	FBgn0083969	CG34133	318566	26.28	897.15	0.0017	0.53	0.0093	0.77	-0.65	-0.098	FALSE	FALSE	FALSE	FALSE	0.0092	0.044	0.67	0.75	0.077	0.93	1	0.92	0.96
fat	III	FBgn0022097	Vha36-1	44702	31.32	2308.68	0.017	0.23	0.054	0.56	-0.21	-0.16	FALSE	FALSE	FALSE	FALSE	0.016	0.066	0.28	0.4	0.088	0.35	0.9	0.22	0.51
fat	III	FBgn0033766	Nup188	36397	24.91	501.21	0.0041	0.42	0.018	0.7	-1.1	-0.25	FALSE	FALSE	FALSE	FALSE	0.041	0.13	0.86	0.9	-0.06	0.92	1	0.17	0.46
fat	III	FBgn0033268	Obp44a	35789	27.66	33.93	0.02	0.22	0.061	0.54	-0.41	-0.5	FALSE	FALSE	FALSE	FALSE	0.0044	0.026	0.054	0.11	0.33	0.95	1	0.96	0.98
fat	III	FBgn0260655	l(3)76BDm	40140	25.13	682.56	0.032	0.16	0.087	0.48	-1	-0.18	FALSE	FALSE	FALSE	FALSE	0.039	0.12	0.42	0.53	0.36	0.94	1	0.67	0.84
fat	III	FBgn0036655	CG13031	39867	24.66	0.17	0.016	0.25	0.052		-1.2	-0.15	FALSE	FALSE	FALSE	FALSE	0.37	0.54	0.19	0.3	-0.59	0.64	1	0.57
fat	III	FBgn0032873	CG2614	35326	25.51	470.99	0.031	0.17	0.086	0.49	-1.1	-0.33	FALSE	FALSE	FALSE	FALSE	0.33	0.51	0.37	0.48	-0.45	0.69	1	0.055	0.32
fat	III	FBgn0027584	CG4757	41330	27.63	629.92	0.025	0.2	0.073	0.52	-0.72	-0.34	FALSE	FALSE	FALSE	FALSE	0.15	0.3	0.00024	0.0014	-1.3	0.75	1	0.12	0.4
fat	III	FBgn0033602	Cpr47Ee	36193	23.41	3.31	0.0064	0.4	0.026		-1.6	-0.29	FALSE	FALSE	FALSE	FALSE	0.53	0.69	0.042	0.091	-1.1	0.56	1	0.66
fat	III	FBgn0261854	aPKC	47594	23.92	592.89	0.013	0.31	0.043	0.62	-1.5	-0.26	FALSE	FALSE	FALSE	FALSE	0.37	0.54	0.16	0.26	-0.77	0.68	1	0.23	0.52
fat	III	FBgn0032387	CG16965	34607	27.5	293.22	0.0017	0.58	0.0094	0.8	-0.57	-0.18	FALSE	FALSE	FALSE	FALSE	0.32	0.5	7.2e-05	0.00056	-0.8	0.3	0.86	0.58	0.79
fat	III	FBgn0005411	U2af50	32602	27.95	1753.49	0.025	0.22	0.073	0.55	-0.36	-0.15	FALSE	FALSE	TRUE	FALSE	0.87	0.92	0.015	0.04	-0.39	0.079	0.5	0.29	0.57
fat	III	FBgn0026369	Sara	44263	23.98	1621.18	0.01	0.35	0.036	0.66	-0.81	-0.15	FALSE	FALSE	FALSE	FALSE	0.034	0.11	0.73	0.8	0.099	0.91	1	0.95	0.97
fat	III	FBgn0260003	Dys	42327	28.47	2579.35	0.025	0.23	0.071	0.56	-0.66	-0.29	FALSE	FALSE	FALSE	FALSE	0.23	0.4	0.49	0.6	-0.19	0.63	1	0.94	0.97
fat	III	FBgn0033241	CG2915	35754	31.15	1248.74	0.0095	0.37	0.035	0.67	-0.21	-0.17	FALSE	FALSE	FALSE	FALSE	0.0015	0.012	0.027	0.062	0.17	0.65	1	0.081	0.35
fat	III	FBgn0036272	Sms	39403	28.87	594.55	0.0091	0.38	0.034	0.67	-0.22	-0.32	FALSE	FALSE	FALSE	FALSE	0.0074	0.038	0.19	0.3	0.1	0.42	0.95	0.077	0.35
fat	III	FBgn0011824	CG4038	37397	29.66	158.7	0.00014	0.83	0.0013	0.93	-0.35	-0.048	FALSE	FALSE	FALSE	FALSE	0.00024	0.0032	1.6e-09	1.5e-07	-0.81	0.88	1	0.15	0.44
fat	III	FBgn0034931	CG2812	37801	23.54	97.59	0.0086	0.4	0.032	0.68	-1.6	-0.2	FALSE	FALSE	FALSE	FALSE	0.2	0.36	0.31	0.42	-0.57	0.81	1	0.98	0.99
fat	III	FBgn0033264	Nup50	35784	28.37	449.9	0.011	0.37	0.039	0.67	-0.29	-0.24	FALSE	FALSE	TRUE	FALSE	0.65	0.78	0.042	0.09	-0.23	0.037	0.36	0.17	0.47
fat	III	FBgn0034709	Swim	37537	31.72	1032.18	3.6e-06	0.97	6.9e-05	0.99	-0.49	-0.013	FALSE	FALSE	FALSE	FALSE	0.0027	0.019	0.11	0.19	-0.12	0.59	1	0.97	0.98
fat	III	FBgn0043806	CG32032	192535	28.35	1717.01	0.015	0.34	0.049	0.65	-0.25	-0.33	FALSE	FALSE	TRUE	FALSE	0.79	0.88	0.0065	0.02	-0.29	0.016	0.26	0.34	0.62
fat	III	FBgn0036460	CG5114	39624	25.15	780.68	0.01	0.41	0.036	0.69	-1.8	-0.15	FALSE	FALSE	FALSE	FALSE	0.21	0.38	0.32	0.44	-0.65	0.82	1	0.11	0.39
fat	III	FBgn0025629	CG4045	31176	26.67	296.49	0.027	0.27	0.077	0.59	-1.2	-0.23	FALSE	FALSE	FALSE	FALSE	0.098	0.22	0.95	0.97	0.032	0.89	1	0.071	0.34
fat	III	FBgn0043456	CG4747	192507	30.64	1903.35	0.00092	0.72	0.0056	0.88	-0.32	-0.078	FALSE	FALSE	TRUE	FALSE	0.21	0.38	1.8e-05	0.00019	-0.46	0.051	0.41	0.29	0.58
fat	III	FBgn0028554	x16	33967	26.26	365.28	0.0044	0.54	0.019	0.78	-0.67	-0.24	FALSE	FALSE	FALSE	FALSE	0.42	0.6	0.05	0.1	-0.43	0.36	0.91	0.16	0.45
fat	III	FBgn0020389	Papss	40167	31.12	1737.2	2.2e-05	0.94	0.0003	0.98	-0.45	-0.016	FALSE	FALSE	FALSE	FALSE	0.003	0.021	0.39	0.51	-0.068	0.64	1	0.053	0.31
fat	III	FBgn0000557	eEF1alpha2	43736	28.89	227.14	0.022	0.31	0.066	0.63	-0.27	-0.36	FALSE	FALSE	FALSE	FALSE	0.038	0.12	0.52	0.63	0.071	0.5	1	0.27	0.56
fat	III	FBgn0027108	Inx2	31646	30.54	1213.41	0.00061	0.77	0.0041	0.9	-0.39	-0.06	FALSE	FALSE	FALSE	FALSE	0.0015	0.012	2.5e-08	1.2e-06	-0.88	0.87	1	0.65	0.83
fat	III	FBgn0013771	Cyp6a9	36663	29.44	2304.07	0.00063	0.77	0.0042	0.9	-0.45	-0.066	FALSE	FALSE	TRUE	FALSE	0.77	0.86	0.0016	0.0066	-0.4	0.036	0.36	0.33	0.62
fat	III	FBgn0028341	Ptpmeg2	31907	24.75	1487.16	0.025	0.31	0.072	0.62	-1.6	-0.14	FALSE	FALSE	FALSE	FALSE	0.94	0.96	0.031	0.071	-1.5	0.39	0.94	0.23	0.52
fat	III	FBgn0263391	hts	37230	25.2	2086.39	0.0062	0.53	0.025	0.77	-0.69	-0.1	FALSE	FALSE	FALSE	FALSE	0.0079	0.04	0.27	0.39	0.25	0.96	1	0.36	0.64
fat	III	FBgn0028427	Ilk	53573	30.09	943.66	9.4e-05	0.91	0.00092	0.96	-0.48	-0.015	FALSE	FALSE	FALSE	FALSE	0.004	0.025	0.74	0.81	-0.032	0.78	1	0.65	0.83
fat	III	FBgn0003321	sbr	43944	25.27	1006	0.036	0.27	0.095	0.59	-1.1	-0.17	FALSE	FALSE	FALSE	FALSE	0.97	0.98	0.04	0.087	-1.1	0.33	0.9	0.8	0.91
fat	III	FBgn0010406	RNaseX25	38885	27.97	688.48	0.0057	0.55	0.024	0.79	-0.31	-0.078	FALSE	FALSE	FALSE	FALSE	0.054	0.15	0.82	0.87	-0.023	0.36	0.91	0.69	0.85
fat	III	FBgn0032125	Cpr30B	34270	30.99	1.09	0.026	0.33	0.074		-0.26	-0.28	FALSE	FALSE	FALSE	FALSE	0.064	0.17	0.72	0.8	0.039	0.38	0.93	0.62
fat	III	FBgn0262738	norpA	31376	24.06	451.39	0.011	0.47	0.039	0.74	-0.58	-0.17	FALSE	FALSE	FALSE	FALSE	0.78	0.87	0.0045	0.015	-0.66	0.19	0.72	0.99	1
fat	III	FBgn0040475	SH3PX1	39136	27.71	1023.76	0.0044	0.6	0.019	0.82	-0.47	-0.097	FALSE	FALSE	FALSE	FALSE	0.55	0.7	0.00065	0.0032	-0.6	0.16	0.66	0.31	0.6
fat	III	FBgn0261260	mgl	8674055	29.01	10856	0.037	0.29	0.097	0.61	-0.18	-0.22	FALSE	FALSE	TRUE	FALSE	0.84	0.9	0.021	0.051	-0.2	0.0057	0.17	0.91	0.96
fat	III	FBgn0031020	Naa15-16	32934	30.57	2144.89	0.01	0.5	0.037	0.75	-0.26	-0.16	FALSE	FALSE	FALSE	FALSE	0.066	0.17	2.6e-05	0.00025	-0.5	0.24	0.79	0.12	0.41
fat	III	FBgn0030582	CG14411	32408	24.41	559.3	0.027	0.35	0.076	0.66	-1.2	-0.16	FALSE	FALSE	FALSE	FALSE	0.38	0.56	0.26	0.37	-0.56	0.65	1	0.52	0.75
fat	III	FBgn0263987	spoon	31459	28.66	2529.75	0.018	0.42	0.057	0.7	-0.4	-0.18	FALSE	FALSE	FALSE	FALSE	0.047	0.14	2.7e-05	0.00026	-0.87	0.71	1	0.86	0.94
fat	III	FBgn0003978	vls	35289	23.95	190.83	0.019	0.42	0.059	0.7	-0.52	-0.2	FALSE	FALSE	FALSE	FALSE	0.11	0.25	0.84	0.89	-0.041	0.68	1	0.089	0.37
fat	III	FBgn0000257	car	32947	27.3	532.61	0.0079	0.56	0.03	0.8	-0.43	-0.099	FALSE	FALSE	FALSE	FALSE	0.04	0.12	0.89	0.93	0.02	0.7	1	0.2	0.49
fat	III	FBgn0029665	CG14270	31319	25.34	258.53	0.029	0.36	0.08	0.66	-3.7	-0.22	FALSE	FALSE	FALSE	FALSE	0.014	0.06	0.16	0.26	2.2	0.99	1	0.12	0.4
fat	III	FBgn0035374	mRpS35	38345	27.85	403.22	0.00049	0.85	0.0034	0.94	-0.44	-0.026	FALSE	FALSE	FALSE	FALSE	0.28	0.45	0.016	0.041	-0.28	0.12	0.61	0.17	0.46
fat	III	FBgn0000667	Actn	31166	34.7	1295.03	0.0018	0.75	0.0098	0.89	-0.28	-0.059	FALSE	FALSE	TRUE	FALSE	0.13	0.28	1.5e-05	0.00017	-0.45	0.064	0.46	0.26	0.55
fat	III	FBgn0027779	VhaSFD	34997	31.94	2674.03	0.0017	0.75	0.0093	0.9	-0.31	-0.035	FALSE	FALSE	TRUE	FALSE	0.61	0.75	0.0084	0.025	-0.25	0.016	0.26	0.57	0.78
fat	III	FBgn0036615	Tcs3	39811	27.54	198.17	0.024	0.4	0.07	0.68	-0.28	-0.25	FALSE	FALSE	TRUE	FALSE	0.54	0.7	0.0037	0.013	-0.38	0.076	0.49	0.041	0.29
fat	III	FBgn0030740	CG9917	32596	26.99	2101.32	0.028	0.37	0.079	0.67	-0.32	-0.11	FALSE	FALSE	TRUE	FALSE	0.72	0.84	0.076	0.14	-0.25	0.083	0.51	0.41	0.67
fat	III	FBgn0265045	Strn-Mlck		29.42	2904.01	0.0082	0.57	0.031	0.8	-1.9	-0.18	FALSE	FALSE	FALSE	FALSE	0.038	0.12	0.84	0.89	0.13	0.96	1	0.29	0.58
fat	III	FBgn0023521	CG3587	31160	26.05	327.34	0.00087	0.82	0.0054	0.92	-0.5	-0.048	FALSE	FALSE	FALSE	FALSE	0.039	0.12	0.41	0.53	-0.11	0.63	1	0.32	0.61
fat	III	FBgn0029820	CG16721	31520	26.76	2542.27	0.033	0.35	0.088	0.66	-0.54	-0.2	FALSE	FALSE	FALSE	FALSE	0.6	0.74	0.14	0.23	-0.36	0.31	0.87	0.37	0.64
fat	III	FBgn0010488	NAT1	46020	30.1	6370.08	0.029	0.38	0.081	0.67	-0.22	-0.14	FALSE	FALSE	TRUE	FALSE	0.69	0.81	0.089	0.16	-0.16	0.019	0.28	0.77	0.89
fat	III	FBgn0038275	CG3817	41805	24.2	114.2	0.012	0.52	0.043	0.77	-0.68	-0.19	FALSE	FALSE	FALSE	FALSE	0.93	0.96	0.0094	0.028	-0.71	0.19	0.72	0.25	0.54
fat	III	FBgn0031590	CG3702	33628	27.24	1593.72	0.011	0.54	0.04	0.78	-0.39	-0.083	FALSE	FALSE	FALSE	FALSE	0.19	0.36	0.38	0.49	-0.12	0.34	0.9	0.28	0.57
fat	III	FBgn0022960	vimar	35609	27.11	341.72	0.0072	0.61	0.028	0.82	-0.57	-0.16	FALSE	FALSE	FALSE	FALSE	0.59	0.74	0.036	0.081	-0.42	0.24	0.78	0.26	0.55
fat	III	FBgn0021760	chb	43901	26.22	1790.01	0.024	0.43	0.07	0.71	-0.29	-0.14	FALSE	FALSE	TRUE	FALSE	0.71	0.83	0.0077	0.023	-0.36	0.057	0.44	0.62	0.81
fat	III	FBgn0032409	Ced-12	34633	25.73	277.52	0.0055	0.65	0.023	0.85	-0.64	-0.091	FALSE	FALSE	FALSE	FALSE	0.36	0.54	0.084	0.16	-0.37	0.4	0.94	0.39	0.66
fat	III	FBgn0011747	Ank	43770	31.57	3291.97	1.4e-05	0.98	0.00022	0.99	-0.34	-0.0062	FALSE	FALSE	TRUE	FALSE	0.94	0.97	1.2e-05	0.00014	-0.34	0.00031	0.089	0.28	0.57
fat	III	FBgn0086357	Sec61alpha	33905	29.95	4000.16	4.8e-05	0.96	0.00054	0.98	-0.57	-0.0061	FALSE	FALSE	FALSE	FALSE	0.21	0.38	1.3e-06	2.7e-05	-0.77	0.18	0.7	0.3	0.59
fat	III	FBgn0000339	cni	34967	26.14	672.97	0.0058	0.67	0.024	0.85	-1.1	-0.086	FALSE	FALSE	FALSE	FALSE	0.038	0.12	0.97	0.97	0.014	0.93	1	0.9	0.96
fat	III	FBgn0039118	CG10208	42814	28.4	238.56	0.0025	0.77	0.013	0.9	-0.52	-0.076	FALSE	TRUE	FALSE	FALSE	6.8e-06	0.00025	4.4e-05	0.00037	0.79	1	1	0.7	0.86
fat	III	FBgn0250757	CG42235	43136	23.64	1910.23	0.0029	0.75	0.014	0.9	-2.2	-0.1	FALSE	TRUE	FALSE	FALSE	0.0022	0.016	0.12	0.21	1.1	1	1	0.98	0.99
fat	III	FBgn0259704	Nsun5	7354421	23	415.7	0.033	0.42	0.088	0.7	-0.99	-0.15	FALSE	FALSE	FALSE	FALSE	0.42	0.59	0.27	0.38	-0.49	0.6	1	0.37	0.65
fat	III	FBgn0035762	Rint1	38807	24.09	580.44	0.017	0.54	0.054	0.78	-1.3	-0.095	FALSE	FALSE	FALSE	FALSE	0.16	0.31	0.58	0.68	-0.28	0.83	1	0.15	0.44
fat	III	FBgn0000317	ck	34882	26.17	1133.81	0.017	0.54	0.053	0.78	-1	-0.096	FALSE	FALSE	FALSE	FALSE	0.33	0.51	0.00076	0.0036	-1.6	0.64	1	0.68	0.85
fat	III	FBgn0014141	cher	42066	34.24	5582.06	0.00095	0.87	0.0057	0.95	-0.2	-0.037	FALSE	FALSE	TRUE	FALSE	0.93	0.96	0.00073	0.0035	-0.21	0.0001	0.089	0.58	0.79
fat	III	FBgn0033027	TpnC4	35498	30.12	13.31	0.036	0.42	0.095	0.7	-1.3	-0.32	FALSE	FALSE	FALSE	FALSE	0.16	0.31	0.85	0.9	-0.1	0.84	1	0.22	0.51
fat	III	FBgn0032669	CG15155	35087	24.12	924.37	0.0032	0.78	0.015	0.9	-1.8	-0.091	FALSE	FALSE	FALSE	FALSE	0.9	0.94	0.0021	0.0082	-1.9	0.37	0.92	0.46	0.71
fat	III	FBgn0034491	Hsl	37289	24.12	895.7	0.019	0.55	0.058	0.79	-1.1	-0.085	FALSE	FALSE	FALSE	FALSE	0.94	0.97	0.015	0.04	-1.2	0.32	0.88	0.77	0.89
fat	III	FBgn0024364	CG11417	31083	23.82	720.34	0.019	0.57	0.059	0.8	-1	-0.13	FALSE	FALSE	FALSE	FALSE	0.86	0.92	0.032	0.072	-0.94	0.34	0.9	0.024	0.25
fat	III	FBgn0000479	dnc	31309	27.88	1740.01	0.037	0.46	0.097	0.73	-0.32	-0.21	FALSE	FALSE	TRUE	FALSE	0.95	0.97	0.045	0.095	-0.3	0.058	0.44	0.89	0.95
fat	III	FBgn0003888	betaTub60D	37888	27.28	662.37	0.029	0.51	0.082	0.76	-0.4	-0.098	FALSE	FALSE	FALSE	FALSE	0.081	0.2	0.81	0.86	0.042	0.66	1	0.41	0.67
fat	III	FBgn0034859	CG3520	37708	25.64	166.2	0.029	0.53	0.08	0.77	-1.4	-0.16	FALSE	TRUE	FALSE	FALSE	0.00044	0.005	0.0016	0.0067	2.1	1	1	0.17	0.46
fat	III	FBgn0011509	SrpRbeta	47283	29.51	385.05	0.019	0.6	0.058	0.82	-0.27	-0.09	FALSE	FALSE	TRUE	FALSE	0.6	0.75	0.0038	0.013	-0.34	0.044	0.39	0.81	0.91
fat	III	FBgn0261049	Vps45	41153	26.59	220.6	0.00038	0.94	0.0029	0.98	-0.92	-0.014	FALSE	FALSE	FALSE	FALSE	0.13	0.27	0.048	0.1	-0.44	0.67	1	0.91	0.96
fat	III	FBgn0000662	fl(2)d	36527	23.94	595.87	0.018	0.63	0.056	0.83	-1.4	-0.092	FALSE	FALSE	FALSE	FALSE	0.033	0.11	1.6e-05	0.00017	-3.1	0.96	1	0.68	0.85
fat	III	FBgn0030796	CG4829	32672	27.41	107.92	5.8e-05	0.98	0.00062	0.99	-0.69	-0.0065	FALSE	FALSE	FALSE	FALSE	0.22	0.39	0.003	0.011	-0.45	0.29	0.85	0.58	0.79
fat	III	FBgn0250732	gfzf	40858	26.97	729.07	0.014	0.67	0.047	0.86	-0.34	-0.1	FALSE	FALSE	FALSE	FALSE	0.2	0.36	0.00022	0.0014	-0.58	0.28	0.84	0.049	0.3
fat	III	FBgn0031897	CG13784	34003	25.51	3322.2	0.025	0.59	0.072	0.81	-0.48	-0.13	FALSE	FALSE	FALSE	FALSE	0.16	0.31	0.73	0.81	-0.069	0.6	1	0.44	0.69
fat	III	FBgn0028665	VhaAC39-1	31342	30.09	2055.1	0.0046	0.81	0.02	0.92	-0.25	-0.034	FALSE	FALSE	TRUE	FALSE	0.21	0.38	8.6e-05	0.00064	-0.39	0.042	0.38	0.92	0.96
fat	III	FBgn0053158	CG33158	39834	25.94	769.11	0.034	0.56	0.091	0.79	-1.2	-0.12	FALSE	FALSE	FALSE	FALSE	0.48	0.65	0.21	0.32	-0.69	0.6	1	0.32	0.61
fat	III	FBgn0026761	Trap1	35559	30.9	1261.18	0.024	0.62	0.071	0.83	-0.16	-0.089	FALSE	FALSE	TRUE	FALSE	0.24	0.42	0.0006	0.003	-0.26	0.0091	0.21	0.23	0.52
fat	III	FBgn0033349	CG8243	35890	26.57	551.68	0.00013	0.98	0.0012	0.99	-0.63	-0.0063	FALSE	FALSE	FALSE	FALSE	0.0038	0.024	0.89	0.92	-0.019	0.92	1	0.23	0.52
fat	III	FBgn0034753	CG2852	37591	32.94	6783.35	0.028	0.62	0.078	0.82	-0.17	-0.088	FALSE	FALSE	TRUE	FALSE	0.2	0.36	0.61	0.71	-0.036	0.026	0.31	0.2	0.49
fat	III	FBgn0039561	mfrn	43353	27.29	613.32	0.0043	0.85	0.019	0.94	-0.39	-0.03	FALSE	FALSE	FALSE	FALSE	0.072	0.18	0.57	0.68	-0.068	0.46	0.98	0.65	0.83
fat	III	FBgn0027608	CG2082	40713	25.74	84.42	0.017	0.7	0.055	0.87	-0.78	-0.12	FALSE	FALSE	FALSE	FALSE	0.96	0.98	0.015	0.039	-0.8	0.23	0.77	0.96	0.98
fat	III	FBgn0035497	CG14995	38487	24.15	201.98	0.00097	0.94	0.0058	0.98	-1.3	-0.019	FALSE	FALSE	FALSE	FALSE	0.18	0.34	0.066	0.13	-0.63	0.74	1	0.48	0.72
fat	III	FBgn0034497	Mpcp1	37297	32.18	317.12	0.00089	0.94	0.0055	0.98	-0.66	-0.022	FALSE	FALSE	FALSE	FALSE	0.25	0.42	0.033	0.075	-0.38	0.4	0.94	0.7	0.86
fat	III	FBgn0260745	mfas	41455	31.09	779.16	0.0044	0.87	0.019	0.95	-0.33	-0.039	FALSE	FALSE	FALSE	FALSE	0.064	0.17	1.1e-05	0.00013	-0.62	0.35	0.91	0.87	0.94
fat	III	FBgn0033916	Usp20-33	36580	24.72	1155.61	0.0073	0.83	0.029	0.93	-1.1	-0.029	FALSE	FALSE	FALSE	FALSE	0.062	0.17	0.83	0.88	-0.078	0.9	1	0.68	0.85
fat	III	FBgn0034488	CG11208	37285	31.03	1483.47	0.016	0.74	0.053	0.89	-0.22	-0.054	FALSE	FALSE	TRUE	FALSE	0.15	0.3	0.00015	0.001	-0.4	0.094	0.54	0.12	0.41
fat	III	FBgn0030586	CG12539	32412	24.39	3.08	0.013	0.78	0.045		-1	-0.11	FALSE	FALSE	FALSE	FALSE	0.0012	0.01	2e-07	6.2e-06	-3	1	1	0.45
fat	III	FBgn0086611	Lcp65Ag3	59159	28.17	1.57	0.013	0.81	0.045		-0.47	-0.08	FALSE	FALSE	FALSE	FALSE	0.45	0.62	0.11	0.2	-0.28	0.26	0.83	0.92
fat	III	FBgn0037933	Ho	41407	28.2	829.89	0.0097	0.84	0.035	0.94	-0.49	-0.047	FALSE	FALSE	FALSE	FALSE	0.006	0.033	0.15	0.24	0.26	0.95	1	0.41	0.67
fat	III	FBgn0032053	mRpL51	34186	26.58	199.11	0.0087	0.85	0.032	0.94	-0.5	-0.034	FALSE	FALSE	FALSE	FALSE	0.0077	0.039	0.21	0.32	0.22	0.93	1	0.62	0.81
fat	III	FBgn0037852	Tpc1	41316	24.84	903.08	0.029	0.74	0.081	0.89	-0.42	-0.064	FALSE	FALSE	FALSE	FALSE	0.061	0.16	0.66	0.75	0.079	0.73	1	0.83	0.92
fat	III	FBgn0033741	CG8545	36365	28.59	664.35	0.013	0.84	0.043	0.94	-0.26	-0.059	FALSE	FALSE	FALSE	FALSE	0.17	0.33	0.00015	0.001	-0.45	0.13	0.63	0.24	0.54
fat	III	FBgn0013733	shot	36542	28.08	28603.8	0.029	0.76	0.082	0.9	-0.31	-0.074	FALSE	FALSE	FALSE	FALSE	0.28	0.46	0.44	0.55	-0.1	0.23	0.78	0.98	0.99
fat	III	FBgn0036117	CG6321	39233	23.48	310.49	0.018	0.83	0.055	0.93	-0.97	-0.049	FALSE	FALSE	FALSE	FALSE	0.0073	0.038	0.11	0.2	0.62	0.99	1	0.68	0.85
fat	III	FBgn0052208	825-Oak	317916	30.6	0.51	0.029	0.79	0.081		-0.4	-0.046	FALSE	FALSE	FALSE	FALSE	0.11	0.24	0.99	0.99	0.0031	0.6	1	0.73
fat	III	FBgn0034628	Acox57D-p	37445	28.89	2042.99	0.00078	0.98	0.0049	0.99	-0.41	-0.0051	FALSE	FALSE	TRUE	FALSE	0.73	0.84	0.0023	0.009	-0.36	0.03	0.33	0.58	0.79
fat	III	FBgn0063495	GstE5	37110	23.7	38.87	0.0065	0.94	0.026	0.98	-1.8	-0.025	FALSE	FALSE	FALSE	FALSE	0.17	0.32	0.31	0.43	-0.6	0.84	1	0.41	0.67
fat	III	FBgn0003209	raw	44851	25.32	1767.23	0.02	0.87	0.061	0.95	-0.58	-0.029	FALSE	FALSE	FALSE	FALSE	0.6	0.75	0.088	0.16	-0.41	0.3	0.86	0.18	0.48
fat	III	FBgn0040283	SMC1	42853	23.38	705.03	0.0096	0.92	0.035	0.97	-1.7	-0.027	FALSE	FALSE	FALSE	FALSE	0.034	0.11	0.73	0.81	0.2	0.96	1	0.52	0.75
fat	III	FBgn0051195	CG31195	46155	29.5	689.8	0.015	0.91	0.05	0.96	-0.25	-0.019	FALSE	FALSE	FALSE	FALSE	0.0087	0.042	0.16	0.25	0.14	0.62	1	0.31	0.59
fat	III	FBgn0264694	mgr	41365	27.83	802.49	0.0082	0.94	0.031	0.98	-0.4	-0.013	FALSE	FALSE	FALSE	FALSE	0.48	0.64	0.00086	0.004	-0.54	0.15	0.66	0.057	0.32
fat	III	FBgn0034499	Cpr56F	37299	29.83	0.99	0.03	0.88	0.084		-0.39	-0.036	FALSE	FALSE	FALSE	FALSE	0.67	0.79	0.1	0.18	-0.29	0.16	0.67	0.23
fat	III	FBgn0035206	CG9186	38150	29.4	837.35	0.0075	0.96	0.029	0.98	-0.42	-0.0085	FALSE	FALSE	FALSE	FALSE	0.57	0.72	0.0013	0.0055	-0.54	0.13	0.63	0.67	0.84
fat	III	FBgn0004456	mew	32275	26.26	1262.95	0.026	0.9	0.074	0.96	-0.43	-0.019	FALSE	FALSE	FALSE	FALSE	0.017	0.069	9.2e-06	0.00011	-1.1	0.89	1	0.045	0.3
fat	III	FBgn0032051	CG13097	34184	24.63	321.76	0.017	0.93	0.055	0.97	-0.4	-0.023	FALSE	FALSE	FALSE	FALSE	0.043	0.13	0.66	0.75	0.068	0.72	1	0.14	0.44
fat	III	FBgn0037819	CG14688	41275	29.04	3349.34	0.017	0.94	0.055	0.98	-0.18	-0.019	FALSE	FALSE	FALSE	FALSE	9.6e-06	0.00032	1.2e-05	0.00014	0.41	0.99	1	0.12	0.41
fat	III	FBgn0038842	hdly	42478	28.19	242.14	0.02	0.95	0.06	0.98	-0.34	-0.014	FALSE	FALSE	FALSE	FALSE	0.0015	0.012	0.013	0.036	0.37	0.97	1	0.36	0.64
fat	III	FBgn0010380	AP-1-2beta	32987	31.96	1576.12	0.018	0.95	0.057	0.98	-0.22	-0.0091	FALSE	FALSE	TRUE	FALSE	0.98	0.99	0.02	0.049	-0.21	0.005	0.17	0.88	0.95
fat	III	FBgn0035205	Ctr9	38149	24.66	1122.86	0.0086	0.98	0.032	0.99	-1.9	-0.0049	FALSE	FALSE	FALSE	FALSE	0.8	0.88	0.019	0.047	-1.7	0.46	0.98	0.83	0.92
fat	III	FBgn0063485	Lasp	39864	27.46	27.52	0.029	0.94	0.081	0.98	-0.35	-0.026	FALSE	FALSE	FALSE	FALSE	0.013	0.057	0.15	0.24	0.22	0.86	1	0.56	0.78
fat	III	FBgn0039611	CG14528	43410	26.75	1241.78	0.023	0.96	0.068	0.98	-0.64	-0.015	FALSE	FALSE	FALSE	FALSE	0.011	0.051	4.7e-06	6.8e-05	-1.7	0.96	1	0.32	0.61
fat	III	FBgn0032922	CG9249	35383	26.42	196.63	0.021	0.99	0.064	0.99	-0.8	-0.0038	FALSE	FALSE	FALSE	FALSE	0.079	0.19	0.92	0.94	0.034	0.86	1	0.87	0.94
fat	IV	FBgn0037762	eloF	41211	27.41	8080.36	2.9e-11	3.6e-06	1.4e-08	0.00019	-2.4	1.1	TRUE	TRUE	FALSE	TRUE	7.6e-08	1.4e-05	0.044	0.094	-0.36	1	1	0.00073	0.041
fat	IV	FBgn0037788	CG3940	41238	26.95	930.64	1.3e-08	4.3e-05	1.1e-06	0.0016	-1.6	1	TRUE	FALSE	FALSE	FALSE	0.6	0.74	4.2e-08	1.8e-06	-1.5	0.17	0.7	0.0044	0.12
fat	IV	FBgn0036787	CG4306	40017	23.51	135.24	0.035	3.3e-13	0.094	9.9e-11	-1.6	2.1	TRUE	FALSE	FALSE	FALSE	0.0083	0.041	0.071	0.14	1.3	0.99	1	0.041	0.29
fat	IV	FBgn0029994	Ldsdh1	31726	33.2	3505.13	3.4e-08	0.00029	2.2e-06	0.0072	-0.73	0.89	TRUE	FALSE	FALSE	TRUE	0.031	0.1	1.3e-05	0.00015	-0.47	0.25	0.81	0.0032	0.098
fat	IV	FBgn0266064	GlyS	41823	34.56	4008.72	1.1e-06	9.8e-05	2.8e-05	0.0031	-0.46	0.91	TRUE	FALSE	FALSE	FALSE	0.022	0.081	0.0017	0.0068	-0.24	0.11	0.58	0.26	0.55
fat	IV	FBgn0033367	PPO2	35910	33.81	1270.26	7.2e-06	4.8e-05	0.00012	0.0018	-0.47	1.2	TRUE	FALSE	FALSE	FALSE	2e-05	0.00054	0.075	0.14	0.14	0.99	1	0.032	0.27
fat	IV	FBgn0261534	l(2)34Fc	34838	31.59	1376.16	1.2e-05	0.00022	0.00018	0.0058	-0.57	1.1	TRUE	FALSE	FALSE	FALSE	0.0055	0.031	0.14	0.23	-0.15	0.72	1	0.039	0.28
fat	IV	FBgn0038829	CG17271	42463	26.24	650.88	0.0013	1.8e-06	0.0074	0.0001	-1	0.82	TRUE	FALSE	FALSE	TRUE	0.62	0.76	0.00027	0.0016	-1.2	0.35	0.9	0.00016	0.012
fat	IV	FBgn0010482	l(2)01289	46017	32.57	1363.62	2.2e-05	0.00025	0.0003	0.0063	-0.45	0.97	TRUE	FALSE	TRUE	FALSE	0.76	0.86	5.6e-05	0.00046	-0.42	0.0071	0.19	0.28	0.57
fat	IV	FBgn0000115	Arl1	39745	25.69	570.06	1.6e-07	0.0083	6.6e-06	0.086	-3.3	0.4	TRUE	TRUE	FALSE	FALSE	1.3e-05	0.00039	0.9	0.93	0.049	1	1	0.42	0.67
fat	IV	FBgn0041629	Hexo2	31808	30.49	1464.86	1.1e-05	0.00072	0.00017	0.015	-0.58	0.91	TRUE	FALSE	TRUE	FALSE	0.37	0.55	0.00016	0.001	-0.46	0.062	0.46	0.053	0.31
fat	IV	FBgn0050008	CG30008	246388	28.07	23144.3	2.9e-07	0.0099	1e-05	0.097	-1.5	0.77	TRUE	TRUE	FALSE	FALSE	7.1e-06	0.00025	0.38	0.5	0.16	1	1	0.12	0.41
fat	IV	FBgn0035090	CG2736	37998	30.11	9623.82	2.2e-11	0.23	1.4e-08	0.56	-1.4	0.36	TRUE	FALSE	FALSE	FALSE	0.00015	0.0023	2.9e-07	8.3e-06	-0.75	0.98	1	0.13	0.43
fat	IV	FBgn0029167	Hml	39529	28.51	8943.18	6.9e-05	0.00026	0.00071	0.0066	-0.72	0.91	TRUE	TRUE	FALSE	FALSE	9e-05	0.0016	0.065	0.13	0.27	1	1	0.0075	0.16
fat	IV	FBgn0034509	Obp57c	37311	25.99	1115.53	2.8e-06	0.0044	5.6e-05	0.056	-1	0.72	TRUE	FALSE	FALSE	FALSE	0.14	0.29	0.00024	0.0014	-0.68	0.47	0.98	0.018	0.23
fat	IV	FBgn0039801	Npc2h	43649	24.56	1778.85	0.00011	0.00031	0.0011	0.0076	-0.72	1.1	TRUE	TRUE	FALSE	FALSE	8.1e-06	0.00028	0.0012	0.0053	0.56	1	1	0.0054	0.13
fat	IV	FBgn0032614	CG13284	35021	31.39	3833.77	9.6e-12	0.35	8.3e-09	0.66	-0.75	0.25	TRUE	FALSE	TRUE	FALSE	0.87	0.92	1.2e-11	4.1e-09	-0.74	7.1e-05	0.089	0.24	0.53
fat	IV	FBgn0026207	mbo	41562	27.21	682.74	0.00022	0.0002	0.0018	0.0055	-0.45	0.57	TRUE	FALSE	FALSE	FALSE	0.12	0.26	0.031	0.071	-0.23	0.19	0.73	0.74	0.88
fat	IV	FBgn0013772	Cyp6a8	36666	28.02	400.69	2.3e-07	0.026	8.6e-06	0.18	-1	0.53	TRUE	TRUE	FALSE	FALSE	6.2e-07	5.1e-05	0.019	0.048	0.33	1	1	0.062	0.33
fat	IV	FBgn0032864	CG2493	35316	30.14	1630.07	1.8e-05	0.0023	0.00025	0.035	-0.69	0.64	TRUE	FALSE	FALSE	FALSE	0.01	0.047	0.094	0.17	-0.21	0.79	1	0.008	0.16
fat	IV	FBgn0036157	CG7560	39276	24.94	1244.31	0.026	8.9e-07	0.074	5.8e-05	-2	1.4	TRUE	FALSE	FALSE	FALSE	0.99	0.99	0.026	0.062	-2	0.39	0.94	0.03	0.26
fat	IV	FBgn0045866	bai	42996	29.41	1605.81	6.6e-08	0.075	3.7e-06	0.34	-0.95	0.38	TRUE	FALSE	TRUE	FALSE	0.59	0.74	2.4e-07	7.3e-06	-0.87	0.053	0.42	0.33	0.61
fat	IV	FBgn0039486	caix	43264	29.85	426.43	8.6e-06	0.0086	0.00014	0.088	-0.74	0.73	TRUE	FALSE	FALSE	FALSE	0.061	0.16	0.0036	0.013	-0.4	0.5	1	0.056	0.32
fat	IV	FBgn0001257	ImpL2	38513	27.99	470.38	6e-11	0.41	2.1e-08	0.69	-1.4	0.18	TRUE	TRUE	FALSE	FALSE	3.1e-07	3.6e-05	0.015	0.039	-0.27	1	1	0.0038	0.11
fat	IV	FBgn0038446	CG14903	42014	26.5	69.11	1.1e-05	0.01	0.00018	0.099	-0.89	0.6	TRUE	FALSE	FALSE	FALSE	0.1	0.23	0.002	0.0077	-0.53	0.53	1	0.24	0.54
fat	IV	FBgn0043783	CG32444	40406	31.6	9864.41	1.2e-07	0.093	5.2e-06	0.37	-0.57	0.49	TRUE	FALSE	FALSE	FALSE	0.00018	0.0026	0.085	0.16	-0.12	0.86	1	0.0076	0.16
fat	IV	FBgn0001114	Glt	34193	33.84	4018.8	2.1e-05	0.0097	0.00029	0.096	-0.49	0.43	TRUE	FALSE	FALSE	TRUE	0.15	0.31	3.8e-07	1e-05	-0.68	0.1	0.56	1.5e-05	0.0018
fat	IV	FBgn0264489	CG43897	39153	30.27	1059.51	2.3e-12	0.69	5e-09	0.87	-2.1	0.12	TRUE	FALSE	FALSE	FALSE	0.17	0.33	1.8e-11	5.2e-09	-1.9	0.31	0.87	0.77	0.89
fat	IV	FBgn0033949	CG10131	36624	24.99	183.77	0.00064	0.00068	0.0043	0.014	-0.58	1	TRUE	FALSE	FALSE	FALSE	0.0061	0.033	0.79	0.85	0.038	0.91	1	0.12	0.41
fat	IV	FBgn0023529	CG2918	31215	32.22	3047.94	0.0054	5.7e-05	0.023	0.002	-0.21	0.4	TRUE	FALSE	TRUE	FALSE	0.81	0.89	0.011	0.032	-0.19	0.0019	0.13	0.051	0.31
fat	IV	FBgn0029990	CG2233	31721	33.72	91173	3.1e-07	0.084	1.1e-05	0.35	-1	0.46	TRUE	TRUE	FALSE	FALSE	4.5e-06	0.00018	0.23	0.34	0.16	1	1	0.015	0.21
fat	IV	FBgn0050359	Mal-A5	35828	29.43	1697.67	9.7e-09	0.27	8.8e-07	0.59	-0.8	0.23	TRUE	TRUE	FALSE	FALSE	1.2e-06	7.8e-05	0.91	0.94	0.0086	1	1	0.84	0.93
fat	IV	FBgn0034198	CG11400	36935	26.96	1987.91	0.0012	0.00076	0.0068	0.015	-0.57	0.82	TRUE	TRUE	FALSE	TRUE	2.4e-07	3e-05	5.9e-07	1.5e-05	1.1	1	1	0.0026	0.089
fat	IV	FBgn0034394	CG15096	37170	29.86	5946.95	1.4e-05	0.024	0.00021	0.17	-0.59	0.56	TRUE	FALSE	TRUE	FALSE	0.93	0.96	1.1e-05	0.00013	-0.6	0.016	0.26	0.0064	0.14
fat	IV	FBgn0022709	Adk1	39396	30.76	890.36	1.7e-05	0.022	0.00024	0.17	-0.4	0.53	TRUE	TRUE	FALSE	FALSE	5.9e-06	0.00023	0.0055	0.018	0.21	0.99	1	0.033	0.27
fat	IV	FBgn0033065	Cyp6w1	35543	30.97	6958.92	8.5e-07	0.087	2.3e-05	0.36	-0.89	0.51	TRUE	TRUE	FALSE	FALSE	7.9e-05	0.0014	0.87	0.91	-0.02	1	1	0.15	0.44
fat	IV	FBgn0038774	CG5023	42400	33.33	259.94	3.9e-08	0.22	2.5e-06	0.54	-0.65	0.35	TRUE	FALSE	FALSE	FALSE	0.00023	0.0032	0.016	0.041	-0.19	0.88	1	0.47	0.72
fat	IV	FBgn0031813	CG9527	33898	29.51	3087.93	3e-10	0.52	7.6e-08	0.77	-1.4	0.14	TRUE	FALSE	FALSE	FALSE	0.00055	0.0059	3.3e-06	5.3e-05	-0.72	0.97	1	0.37	0.64
fat	IV	FBgn0033814	CG4670	36464	27.91	1604.62	5.7e-07	0.11	1.7e-05	0.39	-0.62	0.28	TRUE	TRUE	FALSE	FALSE	2.1e-06	0.00011	0.046	0.098	0.17	1	1	0.16	0.45
fat	IV	FBgn0031260	Spp	33227	29.43	1550.6	5.8e-06	0.043	0.0001	0.24	-0.56	0.4	TRUE	TRUE	FALSE	FALSE	7.4e-06	0.00026	0.024	0.057	0.22	1	1	0.39	0.66
fat	IV	FBgn0014411	Vps26	31144	28.34	587.59	0.00012	0.0076	0.0012	0.081	-0.45	0.38	TRUE	FALSE	FALSE	FALSE	0.00076	0.0075	0.41	0.52	0.077	0.91	1	0.023	0.25
fat	IV	FBgn0031037	CG14207	32955	26.85	2204.57	0.00012	0.0079	0.0011	0.083	-0.62	0.61	TRUE	FALSE	FALSE	FALSE	0.0069	0.036	0.56	0.66	-0.075	0.87	1	0.071	0.34
fat	IV	FBgn0011205	fbl	46234	28.12	8490.58	6.2e-06	0.044	0.00011	0.25	-0.71	0.45	TRUE	FALSE	FALSE	FALSE	0.0011	0.0099	0.4	0.52	-0.096	0.95	1	0.027	0.26
fat	IV	FBgn0039690	Gnpnat	43504	30.45	904.25	2.9e-05	0.02	0.00037	0.15	-0.49	0.55	TRUE	FALSE	TRUE	FALSE	0.36	0.53	2e-06	3.8e-05	-0.61	0.044	0.39	0.0054	0.13
fat	IV	FBgn0032281	CG17107	34467	26.31	46.28	5.2e-05	0.014	0.00057	0.12	-1.7	0.82	TRUE	FALSE	FALSE	FALSE	0.17	0.32	9.3e-07	2.1e-05	-2.3	0.75	1	0.36	0.63
fat	IV	FBgn0039297	CG11852	43035	29.87	670.21	0.0002	0.006	0.0017	0.07	-0.49	0.86	TRUE	TRUE	FALSE	FALSE	3.2e-05	0.00079	0.0057	0.018	0.33	1	1	0.12	0.41
fat	IV	FBgn0039628	CG11841	43430	27.82	2348.72	0.00087	0.0018	0.0054	0.029	-0.66	0.94	TRUE	FALSE	FALSE	FALSE	0.32	0.5	0.02	0.051	-0.42	0.34	0.9	0.087	0.37
fat	IV	FBgn0036587	CG4950	39783	27.23	463.67	0.0018	0.00085	0.0098	0.017	-0.7	1	TRUE	FALSE	FALSE	FALSE	0.38	0.56	0.028	0.065	-0.46	0.36	0.91	0.014	0.2
fat	IV	FBgn0039674	CG1907	43483	33.51	2396.13	3.4e-05	0.02	0.00041	0.15	-0.3	0.58	TRUE	FALSE	TRUE	FALSE	0.85	0.91	5.9e-05	0.00047	-0.29	0.0003	0.089	0.047	0.3
fat	IV	FBgn0028543	NimB2	260645	27.1	8302.98	1.3e-08	0.32	1.1e-06	0.64	-1.7	0.32	TRUE	TRUE	FALSE	FALSE	0.00026	0.0034	0.003	0.011	-0.6	1	1	0.14	0.43
fat	IV	FBgn0037288	CG14661	40611	32.37	5336.33	1e-07	0.21	4.9e-06	0.53	-0.9	0.32	TRUE	FALSE	FALSE	FALSE	0.062	0.17	1.9e-05	0.00019	-0.61	0.38	0.93	0.027	0.26
fat	IV	FBgn0031417	CG3597	33420	32.05	4967.48	0.00052	0.0031	0.0036	0.043	-0.31	0.88	TRUE	FALSE	TRUE	TRUE	0.16	0.31	0.044	0.094	-0.16	0.044	0.39	0.0017	0.072
fat	IV	FBgn0038037	Cyp9f2	41520	30.98	6598.48	9.3e-10	0.5	1.7e-07	0.76	-0.75	0.18	TRUE	FALSE	FALSE	FALSE	1.5e-05	0.00044	0.0033	0.012	-0.22	0.98	1	0.26	0.55
fat	IV	FBgn0051207	CG31207	326125	25.54	510.79	3.7e-05	0.021	0.00044	0.16	-3.4	0.62	TRUE	FALSE	FALSE	FALSE	0.16	0.31	0.0034	0.012	-2.1	0.85	1	0.087	0.37
fat	IV	FBgn0030990	CG7556	32902	26.39	1897.77	1.7e-06	0.096	3.8e-05	0.38	-1	0.34	TRUE	FALSE	FALSE	FALSE	0.014	0.058	0.0056	0.018	-0.45	0.85	1	0.26	0.55
fat	IV	FBgn0036750	CG6034	39974	25.69	60.51	4.8e-05	0.021	0.00054	0.16	-2.8	0.81	TRUE	FALSE	FALSE	FALSE	0.25	0.43	0.0018	0.0073	-1.9	0.76	1	0.031	0.27
fat	IV	FBgn0035600	Cyt-c1	38612	32.71	4598.56	0.0016	0.0014	0.009	0.025	-0.52	0.64	TRUE	FALSE	FALSE	FALSE	0.00093	0.0085	0.074	0.14	0.26	0.98	1	0.036	0.27
fat	IV	FBgn0030828	CG5162	32709	29.23	890.12	7.2e-09	0.41	7.6e-07	0.69	-0.89	0.26	TRUE	FALSE	FALSE	FALSE	0.034	0.11	1.6e-06	3.2e-05	-0.61	0.32	0.88	0.12	0.41
fat	IV	FBgn0004921	Ggamma1	35881	30.26	1549.89	4.1e-05	0.026	0.00047	0.18	-0.59	0.56	TRUE	FALSE	FALSE	FALSE	0.33	0.51	2.4e-06	4.2e-05	-0.75	0.12	0.61	0.009	0.17
fat	IV	FBgn0040102	lectin-24Db	53550	23.65	201.4	0.0075	0.0003	0.029	0.0074	-1.3	1	TRUE	FALSE	FALSE	TRUE	0.12	0.26	0.48	0.59	-0.31	0.85	1	0.0028	0.092
fat	IV	FBgn0039800	Npc2g	43648	29.65	5068.65	0.00018	0.011	0.0015	0.1	-0.56	0.76	TRUE	TRUE	FALSE	FALSE	4.5e-08	1e-05	2.2e-07	6.9e-06	0.96	1	1	0.023	0.25
fat	IV	FBgn0039682	Obp99c	43494	31.55	17350.7	0.0011	0.0028	0.0065	0.04	-0.36	0.89	TRUE	TRUE	FALSE	FALSE	1.5e-07	2.2e-05	3e-07	8.7e-06	0.74	1	1	0.0069	0.15
fat	IV	FBgn0031313	CG5080	33299	31.74	6032.78	8.9e-07	0.16	2.4e-05	0.47	-0.54	0.4	TRUE	TRUE	FALSE	FALSE	5.8e-07	5.1e-05	0.0034	0.012	0.25	1	1	0.2	0.49
fat	IV	FBgn0032897	CG9336	35355	29.83	2379.35	2.5e-07	0.24	9.1e-06	0.56	-2.1	0.33	TRUE	FALSE	FALSE	FALSE	0.42	0.59	2.1e-06	3.9e-05	-1.8	0.46	0.98	0.26	0.55
fat	IV	FBgn0263830	CG40486	3355162	27.14	677.83	0.00083	0.0048	0.0052	0.06	-0.67	0.85	TRUE	TRUE	FALSE	FALSE	0.00039	0.0046	0.046	0.097	0.36	1	1	0.052	0.31
fat	IV	FBgn0031305	Iris	33290	30.97	10178.9	3e-08	0.39	2e-06	0.68	-1.1	0.23	TRUE	FALSE	FALSE	FALSE	0.00043	0.0049	0.0046	0.016	-0.39	0.98	1	0.024	0.25
fat	IV	FBgn0061356	CG18003	3771779	27.38	1439.69	2.8e-07	0.25	9.8e-06	0.57	-2.3	0.32	TRUE	FALSE	FALSE	FALSE	0.06	0.16	6.9e-05	0.00054	-1.5	0.87	1	0.098	0.38
fat	IV	FBgn0043578	PGRP-SB1	39870	27.96	733.57	0.0019	0.0027	0.01	0.039	-0.65	1.1	TRUE	FALSE	FALSE	FALSE	0.0094	0.044	0.64	0.73	0.086	0.93	1	0.071	0.34
fat	IV	FBgn0028325	Pdha	31406	34.28	4170.36	0.016	0.00021	0.052	0.0055	-0.15	0.62	TRUE	FALSE	TRUE	FALSE	0.13	0.27	0.00012	0.00082	-0.28	0.0081	0.2	0.0077	0.16
fat	IV	FBgn0037010	CG4825	40281	23.27	1007.73	0.037	5.1e-05	0.096	0.0018	-1	0.72	TRUE	FALSE	FALSE	FALSE	0.21	0.38	0.69	0.77	-0.18	0.77	1	0.055	0.31
fat	IV	FBgn0033836	CG18278	36487	29.21	96.66	3e-08	0.42	2e-06	0.7	-0.99	0.2	TRUE	FALSE	TRUE	FALSE	0.65	0.78	1.1e-08	6.2e-07	-1.1	0.044	0.39	0.82	0.92
fat	IV	FBgn0039300	RpS27	43039	32.13	12986.6	1.7e-05	0.071	0.00025	0.33	-0.63	0.37	TRUE	FALSE	FALSE	FALSE	0.066	0.17	0.0067	0.021	-0.33	0.39	0.94	0.052	0.31
fat	IV	FBgn0024293	Spn43Ab	45040	31.25	14503	9.6e-05	0.031	0.00094	0.2	-0.47	0.63	TRUE	FALSE	FALSE	FALSE	0.00024	0.0033	0.16	0.26	0.14	0.97	1	0.025	0.26
fat	IV	FBgn0029838	CG4666	31541	31.11	2597.01	4.1e-05	0.05	0.00047	0.27	-0.47	0.56	TRUE	FALSE	TRUE	FALSE	0.39	0.56	3.3e-06	5.3e-05	-0.58	0.039	0.36	0.15	0.44
fat	IV	FBgn0023525	CG3191	31209	26.93	480.08	1.3e-05	0.087	0.0002	0.36	-0.71	0.52	TRUE	TRUE	FALSE	FALSE	4.6e-05	0.001	0.13	0.22	0.19	1	1	0.18	0.47
fat	IV	FBgn0033543	CG12338	36128	31.03	3236.58	8.1e-06	0.11	0.00014	0.4	-0.45	0.46	TRUE	FALSE	TRUE	FALSE	0.28	0.46	4.1e-07	1.1e-05	-0.56	0.02	0.28	0.059	0.32
fat	IV	FBgn0039321	CG10550	43061	29.04	1110.8	1.5e-06	0.2	3.6e-05	0.52	-0.6	0.3	TRUE	FALSE	FALSE	FALSE	0.00011	0.0019	0.92	0.95	-0.0082	0.97	1	0.19	0.48
fat	IV	FBgn0036760	CG5567	39986	30.96	2060.89	3e-06	0.16	6.1e-05	0.47	-0.49	0.28	TRUE	TRUE	FALSE	FALSE	5.8e-07	5.1e-05	0.00081	0.0038	0.29	1	1	0.16	0.45
fat	IV	FBgn0027578	CG14526	43413	29.36	3211.48	1e-07	0.38	4.9e-06	0.67	-0.48	0.21	TRUE	FALSE	FALSE	FALSE	2.5e-06	0.00012	0.31	0.42	0.059	0.99	1	0.037	0.28
fat	IV	FBgn0031860	CG11236	33955	29.66	1426.88	2.6e-05	0.076	0.00034	0.34	-0.55	0.49	TRUE	FALSE	FALSE	FALSE	0.11	0.25	0.0042	0.014	-0.32	0.22	0.76	0.057	0.32
fat	IV	FBgn0264494	CG17646	33354	29.26	17834.2	1.8e-07	0.35	7e-06	0.66	-0.91	0.23	TRUE	FALSE	FALSE	FALSE	0.036	0.12	8.4e-05	0.00063	-0.56	0.53	1	0.045	0.3
fat	IV	FBgn0037763	CG16904	41212	28.87	26147.4	0.00054	0.014	0.0037	0.12	-0.66	0.68	TRUE	FALSE	TRUE	FALSE	0.92	0.95	0.00075	0.0036	-0.63	0.084	0.51	0.073	0.34
fat	IV	FBgn0053138	AGBE	326264	35.05	6504.66	0.0001	0.042	0.00097	0.24	-0.26	0.45	TRUE	FALSE	TRUE	FALSE	0.0055	0.031	0.61	0.7	-0.027	0.083	0.51	0.27	0.56
fat	IV	FBgn0032889	CG9331	35347	34.05	2727.25	0.0093	0.001	0.034	0.02	-0.25	0.82	TRUE	FALSE	FALSE	TRUE	0.12	0.26	0.54	0.65	-0.055	0.13	0.63	0.0013	0.06
fat	IV	FBgn0010435	emp	37999	30.74	4224.22	4.3e-05	0.07	0.00049	0.32	-0.42	0.41	TRUE	FALSE	TRUE	FALSE	0.83	0.9	8.1e-05	0.00061	-0.4	0.0053	0.17	0.14	0.43
fat	IV	FBgn0032022	CG14275	34144	24.87	308.47	0.00015	0.038	0.0013	0.23	-1.1	0.51	TRUE	FALSE	FALSE	FALSE	0.013	0.055	0.38	0.5	-0.2	0.94	1	0.034	0.27
fat	IV	FBgn0035032	ATPsynF	37931	33.54	3649.66	4e-05	0.077	0.00047	0.34	-0.37	0.42	TRUE	FALSE	FALSE	FALSE	0.0091	0.044	0.21	0.32	-0.089	0.28	0.84	0.037	0.28
fat	IV	FBgn0030272	CG15201	32053	29.56	825.62	5.9e-05	0.065	0.00062	0.31	-0.8	0.54	TRUE	FALSE	FALSE	FALSE	0.57	0.72	0.00034	0.0019	-0.67	0.16	0.68	0.033	0.27
fat	IV	FBgn0053307	CG33307	2768914	29.52	1076.08	0.00043	0.022	0.0031	0.16	-0.64	0.67	TRUE	TRUE	FALSE	FALSE	1.7e-06	0.0001	2.8e-05	0.00026	0.83	1	1	0.023	0.25
fat	IV	FBgn0053178	CG33178	318913	26.53	616.9	0.0078	0.0017	0.03	0.028	-0.44	0.87	TRUE	FALSE	FALSE	FALSE	0.04	0.12	0.89	0.92	0.021	0.72	1	0.044	0.29
fat	IV	FBgn0263260	sel	36046	28.95	483.56	1.8e-05	0.11	0.00025	0.41	-0.78	0.25	TRUE	FALSE	FALSE	FALSE	0.014	0.058	0.065	0.13	-0.26	0.82	1	0.85	0.93
fat	IV	FBgn0031263	Tspo	33231	27.96	1838.87	5.6e-06	0.18	9.9e-05	0.5	-0.87	0.3	TRUE	FALSE	FALSE	FALSE	0.06	0.16	0.0023	0.0088	-0.48	0.59	1	0.5	0.73
fat	IV	FBgn0040206	krz	53554	29.2	1813.15	2e-05	0.12	0.00028	0.41	-0.36	0.34	TRUE	FALSE	FALSE	FALSE	2.5e-05	0.00064	0.039	0.085	0.14	0.95	1	0.24	0.53
fat	IV	FBgn0039341	CG5112	43083	30.61	4477.23	1.7e-06	0.26	3.9e-05	0.58	-0.41	0.24	TRUE	FALSE	TRUE	FALSE	0.093	0.22	2.3e-08	1.2e-06	-0.55	0.015	0.25	0.57	0.78
fat	IV	FBgn0039678	Obp99a	43488	30.76	16020.5	0.00051	0.023	0.0036	0.17	-0.52	0.69	TRUE	TRUE	FALSE	FALSE	2.3e-06	0.00012	3.8e-05	0.00034	0.67	1	1	0.018	0.23
fat	IV	FBgn0037686	RpL34b	41120	31.9	13166.7	6.2e-05	0.077	0.00065	0.34	-0.6	0.42	TRUE	FALSE	FALSE	FALSE	0.27	0.45	2.4e-06	4.2e-05	-0.79	0.18	0.7	0.068	0.33
fat	IV	FBgn0033555	RpS15Ab	36142	25.39	4074.61	2.8e-07	0.4	9.7e-06	0.69	-1.1	0.19	TRUE	TRUE	FALSE	FALSE	1.8e-05	0.00052	0.86	0.9	0.025	1	1	0.17	0.47
fat	IV	FBgn0033679	CG8888	36293	30.77	139.25	1.6e-05	0.14	0.00023	0.44	-0.64	0.45	TRUE	FALSE	FALSE	FALSE	0.21	0.38	0.00077	0.0037	-0.44	0.19	0.72	0.41	0.67
fat	IV	FBgn0013681	mt:ND3	192475	27.76	2302.82	0.0036	0.0053	0.017	0.064	-0.43	0.85	TRUE	FALSE	FALSE	FALSE	0.0086	0.042	0.42	0.54	0.1	0.85	1	0.38	0.65
fat	IV	FBgn0034543	galla-1	246485	24.18	531.28	0.0005	0.026	0.0035	0.18	-1	0.47	TRUE	FALSE	FALSE	FALSE	0.045	0.13	0.24	0.35	-0.29	0.87	1	0.026	0.26
fat	IV	FBgn0037552	CG7800	40963	26.21	381.67	0.011	0.0018	0.039	0.029	-0.41	0.68	TRUE	FALSE	TRUE	FALSE	0.82	0.9	0.0055	0.018	-0.45	0.082	0.51	0.0056	0.13
fat	IV	FBgn0036881	Cpr76Bd	40123	34.77	48.18	4.8e-05	0.098	0.00054	0.38	-0.44	0.55	TRUE	FALSE	FALSE	FALSE	0.12	0.26	0.007	0.022	-0.25	0.11	0.58	0.2	0.49
fat	IV	FBgn0028938	CG16886	34809	28.26	3.78	0.0014	0.014	0.0081		-0.48	0.94	TRUE	FALSE	TRUE	FALSE	0.59	0.73	0.008	0.024	-0.38	0.098	0.55	0.035
fat	IV	FBgn0034724	babos	37557	30.34	1468.87	7.1e-07	0.36	2e-05	0.66	-0.88	0.23	TRUE	FALSE	FALSE	FALSE	0.055	0.15	0.00024	0.0014	-0.54	0.5	1	0.04	0.28
fat	IV	FBgn0030616	RpL37a	32446	30.38	16942.7	0.0016	0.013	0.0087	0.12	-0.55	0.5	TRUE	FALSE	FALSE	FALSE	0.24	0.41	0.06	0.12	-0.29	0.34	0.9	0.015	0.22
fat	IV	FBgn0027095	Manf	41983	28.5	496.11	0.015	0.0013	0.05	0.023	-0.32	0.55	TRUE	FALSE	FALSE	FALSE	0.021	0.078	0.38	0.5	0.11	0.69	1	0.46	0.71
fat	IV	FBgn0015576	alpha-Est8	40899	26.57	1788.9	1.3e-06	0.34	3.2e-05	0.65	-1.4	0.28	TRUE	TRUE	FALSE	FALSE	6e-05	0.0012	0.82	0.87	0.045	1	1	0.15	0.44
fat	IV	FBgn0250833	CG34461	5740547	32.32	2.09	0.0009	0.023	0.0055		-0.47	0.83	TRUE	FALSE	FALSE	FALSE	0.16	0.31	0.075	0.14	-0.22	0.29	0.85	0.15
fat	IV	FBgn0015808	ScpX	44183	31.84	5319.36	4.8e-05	0.11	0.00054	0.41	-0.36	0.4	TRUE	FALSE	TRUE	FALSE	0.093	0.22	0.011	0.032	-0.19	0.045	0.39	0.066	0.33
fat	IV	FBgn0037230	CG9780	40540	24.35	10382.2	0.0025	0.011	0.012	0.1	-2.2	0.74	TRUE	FALSE	FALSE	FALSE	0.2	0.36	0.12	0.21	-1	0.82	1	0.041	0.29
fat	IV	FBgn0004028	wupA	32794	27.76	2283.96	0.0002	0.06	0.0017	0.3	-0.47	0.45	TRUE	FALSE	TRUE	FALSE	0.49	0.65	0.0018	0.0072	-0.37	0.057	0.43	0.09	0.37
fat	IV	FBgn0035356	CG16986	38325	29.1	416.78	2.3e-06	0.31	5e-05	0.62	-0.84	0.18	TRUE	FALSE	FALSE	FALSE	0.00051	0.0055	0.4	0.52	-0.1	0.98	1	0.52	0.75
fat	IV	FBgn0039102	SPE	42791	29.03	3228.22	0.022	0.0011	0.066	0.02	-0.33	0.98	TRUE	FALSE	FALSE	FALSE	0.59	0.74	0.0043	0.014	-0.43	0.11	0.57	0.021	0.24
fat	IV	FBgn0032923	CG9248	35384	30.31	680.27	8.4e-09	0.71	8.2e-07	0.88	-0.71	0.053	TRUE	FALSE	FALSE	FALSE	0.00015	0.0023	0.0034	0.012	-0.24	0.91	1	0.67	0.84
fat	IV	FBgn0027582	CG6230	34546	27.84	927.41	9e-06	0.22	0.00015	0.54	-0.49	0.17	TRUE	FALSE	TRUE	FALSE	0.42	0.6	9.8e-07	2.2e-05	-0.58	0.021	0.28	0.23	0.52
fat	IV	FBgn0000536	eas	32585	30.41	3256.03	4.1e-05	0.13	0.00047	0.43	-0.51	0.36	TRUE	FALSE	FALSE	FALSE	0.00039	0.0045	0.46	0.57	0.072	0.96	1	0.015	0.22
fat	IV	FBgn0015622	Cnx99A	44643	30.41	1316.3	0.0039	0.0082	0.018	0.085	-0.24	0.31	TRUE	FALSE	FALSE	FALSE	0.0004	0.0046	0.011	0.031	0.21	0.85	1	0.086	0.36
fat	IV	FBgn0034328	IM23	37099	29.33	177.7	0.00025	0.062	0.002	0.3	-0.91	0.67	TRUE	FALSE	FALSE	FALSE	0.88	0.93	0.00039	0.0021	-0.87	0.15	0.66	0.25	0.54
fat	IV	FBgn0037447	Neurochondrin	40796	31.11	1418.64	3e-05	0.16	0.00038	0.47	-0.43	0.35	TRUE	FALSE	FALSE	FALSE	0.00015	0.0024	0.24	0.35	0.094	0.94	1	0.32	0.6
fat	IV	FBgn0261792	snRNP-U1-C	42274	24.35	55.33	8.3e-05	0.11	0.00083	0.4	-2.4	0.4	TRUE	FALSE	FALSE	FALSE	0.015	0.061	0.22	0.33	-0.61	0.98	1	0.69	0.85
fat	IV	FBgn0027586	CG5867	34728	29.91	1198.31	6.2e-08	0.62	3.6e-06	0.82	-0.97	0.14	TRUE	FALSE	FALSE	FALSE	0.086	0.21	6.4e-06	8.7e-05	-0.69	0.35	0.9	0.35	0.63
fat	IV	FBgn0087035	AGO2	39683	30.35	11124.4	5.4e-05	0.13	0.00058	0.43	-0.39	0.26	TRUE	FALSE	FALSE	FALSE	0.003	0.02	0.68	0.76	-0.031	0.56	1	0.01	0.18
fat	IV	FBgn0035344	Cyp4d20	38311	27.36	2338.91	1.3e-05	0.22	0.0002	0.54	-0.65	0.34	TRUE	FALSE	FALSE	FALSE	0.29	0.47	0.00034	0.0019	-0.48	0.14	0.63	0.22	0.51
fat	IV	FBgn0038922	Idh3b	42586	33.02	1431.33	3.7e-07	0.49	1.2e-05	0.75	-0.45	0.11	TRUE	FALSE	FALSE	FALSE	0.0069	0.036	0.0024	0.0091	-0.2	0.13	0.62	0.39	0.65
fat	IV	FBgn0010412	RpS19a	32635	33.63	17768.5	1.3e-05	0.22	0.0002	0.55	-0.43	0.29	TRUE	FALSE	FALSE	FALSE	0.012	0.051	0.061	0.12	-0.14	0.31	0.87	0.21	0.5
fat	IV	FBgn0085356	CG34327	5740714	32.4	295.9	3.4e-07	0.5	1.1e-05	0.76	-0.85	0.2	TRUE	FALSE	FALSE	FALSE	0.15	0.31	1.9e-05	0.00019	-0.62	0.23	0.78	0.25	0.54
fat	IV	FBgn0004507	GlyP	33386	38.06	8689.43	0.0072	0.006	0.028	0.07	-0.19	0.46	TRUE	FALSE	TRUE	FALSE	0.026	0.092	4.8e-06	6.9e-05	-0.4	0.074	0.49	0.022	0.25
fat	IV	FBgn0031538	CG3246	33564	29.27	8330.06	0.00024	0.073	0.002	0.33	-0.34	0.55	TRUE	FALSE	FALSE	FALSE	0.00017	0.0026	0.047	0.1	0.16	0.93	1	0.14	0.44
fat	IV	FBgn0010747	Srp54k	38593	30.31	2106.84	0.0013	0.027	0.0072	0.19	-0.41	0.29	TRUE	FALSE	FALSE	FALSE	0.027	0.095	0.68	0.76	-0.046	0.57	1	0.077	0.35
fat	IV	FBgn0040931	CG9034	50405	29.07	690.07	0.00059	0.046	0.004	0.26	-0.51	0.49	TRUE	FALSE	FALSE	FALSE	0.43	0.61	5.1e-05	0.00043	-0.65	0.13	0.63	0.19	0.48
fat	IV	FBgn0034162	CG6426	36891	27.2	4485.84	0.00015	0.095	0.0013	0.37	-0.62	0.51	TRUE	FALSE	FALSE	FALSE	0.0056	0.031	0.74	0.81	-0.043	0.89	1	0.15	0.44
fat	IV	FBgn0026565	Ass	40812	29.61	1626.13	1.7e-07	0.57	6.9e-06	0.8	-0.81	0.16	TRUE	TRUE	FALSE	FALSE	7e-06	0.00025	0.56	0.67	0.057	1	1	0.39	0.66
fat	IV	FBgn0032213	CG5390	34383	31.53	3580.49	0.00049	0.052	0.0035	0.27	-0.31	0.51	TRUE	FALSE	FALSE	FALSE	0.0023	0.017	0.45	0.56	0.056	0.58	1	0.13	0.43
fat	IV	FBgn0034398	CG15098	37174	24.47	8991.19	0.00032	0.067	0.0025	0.32	-2.3	0.46	TRUE	TRUE	FALSE	FALSE	0.0032	0.021	0.71	0.79	0.19	1	1	0.14	0.44
fat	IV	FBgn0266417	ringer	39813	29.35	375.63	2.2e-06	0.38	4.8e-05	0.67	-0.95	0.21	TRUE	FALSE	TRUE	FALSE	0.8	0.88	1.1e-06	2.4e-05	-1	0.077	0.5	0.069	0.33
fat	IV	FBgn0037312	CG11999	40637	28.98	574.24	0.00052	0.053	0.0036	0.28	-0.5	0.31	TRUE	FALSE	FALSE	FALSE	0.16	0.31	0.044	0.095	-0.26	0.29	0.85	0.66	0.84
fat	IV	FBgn0031049	Sec61gamma	32968	28.52	799.83	7.1e-06	0.29	0.00012	0.61	-1	0.25	TRUE	FALSE	FALSE	FALSE	0.007	0.036	0.066	0.13	-0.32	0.93	1	0.7	0.86
fat	IV	FBgn0036728	UQCR-Q	39950	32.91	1433.84	0.015	0.0031	0.05	0.044	-0.43	0.68	TRUE	FALSE	FALSE	FALSE	0.49	0.65	0.0018	0.0071	-0.59	0.22	0.76	0.007	0.15
fat	IV	FBgn0016122	Acer	34189	30.72	10706.9	0.0011	0.034	0.0063	0.21	-0.41	0.49	TRUE	TRUE	FALSE	FALSE	6e-07	5.1e-05	2.5e-06	4.3e-05	0.72	1	1	0.043	0.29
fat	IV	FBgn0036759	CG5577	39985	30.06	2044.77	8.9e-05	0.13	0.00087	0.43	-0.4	0.45	TRUE	TRUE	FALSE	FALSE	6.3e-07	5.1e-05	2.6e-05	0.00025	0.44	1	1	0.056	0.32
fat	IV	FBgn0027583	CG7601	43502	29.05	614.94	3.8e-06	0.34	7.2e-05	0.65	-0.84	0.19	TRUE	FALSE	FALSE	FALSE	0.0029	0.02	0.1	0.19	-0.22	0.93	1	0.26	0.56
fat	IV	FBgn0028527	CG18507	34775	24.73	422.14	0.036	0.0011	0.094	0.02	-0.93	0.65	TRUE	FALSE	FALSE	FALSE	0.034	0.11	0.34	0.46	0.4	0.95	1	0.08	0.35
fat	IV	FBgn0037718	P58IPK	41161	29.92	1966.4	0.0023	0.021	0.012	0.16	-0.46	0.4	TRUE	FALSE	FALSE	FALSE	0.1	0.23	0.28	0.4	-0.14	0.44	0.97	0.2	0.49
fat	IV	FBgn0016691	ATPsynO	41845	34.96	4676.38	8.7e-05	0.14	0.00086	0.44	-0.35	0.29	TRUE	FALSE	FALSE	FALSE	0.026	0.092	0.12	0.21	-0.11	0.15	0.66	0.022	0.25
fat	IV	FBgn0022355	Tsf1	32821	32.62	20467.3	5.6e-08	0.68	3.3e-06	0.86	-0.88	0.13	TRUE	TRUE	FALSE	FALSE	8.6e-06	0.00029	0.82	0.87	-0.023	1	1	0.036	0.27
fat	IV	FBgn0038450	CG17560	42022	32.14	27879.6	0.021	0.0026	0.063	0.038	-0.18	0.84	TRUE	FALSE	TRUE	FALSE	0.82	0.9	0.011	0.03	-0.21	0.0032	0.15	0.27	0.56
fat	IV	FBgn0026576	CG5991	42849	32.48	6928.02	5.6e-05	0.17	0.0006	0.49	-0.47	0.39	TRUE	FALSE	FALSE	FALSE	0.046	0.14	0.039	0.085	-0.2	0.28	0.84	0.31	0.59
fat	IV	FBgn0031700	CG14022	33763	23.96	253.7	0.00078	0.049	0.0049	0.26	-1.7	0.57	TRUE	FALSE	FALSE	FALSE	0.18	0.34	0.054	0.11	-0.87	0.79	1	0.14	0.43
fat	IV	FBgn0023550	FarO	45707	27.99	2274.04	0.00036	0.076	0.0027	0.34	-0.71	0.56	TRUE	FALSE	FALSE	FALSE	0.13	0.27	3.3e-06	5.3e-05	-1.1	0.55	1	0.49	0.73
fat	IV	FBgn0034500	CG11200	37301	29.86	1126.25	0.00071	0.054	0.0046	0.28	-0.33	0.48	TRUE	FALSE	TRUE	FALSE	0.28	0.46	2.4e-05	0.00023	-0.46	0.038	0.36	0.17	0.46
fat	IV	FBgn0011722	Tig	33896	32.58	7780.58	2.5e-05	0.23	0.00033	0.55	-0.46	0.34	TRUE	FALSE	TRUE	FALSE	0.57	0.72	4.9e-06	6.9e-05	-0.52	0.014	0.25	0.12	0.4
fat	IV	FBgn0262124	uex	5740320	29.46	1926.89	3.9e-07	0.57	1.2e-05	0.8	-0.59	0.13	TRUE	FALSE	FALSE	FALSE	0.0029	0.02	0.0088	0.026	-0.22	0.61	1	0.26	0.55
fat	IV	FBgn0053120	CG33120	326260	29.91	3420.25	3.7e-06	0.4	7.1e-05	0.68	-0.62	0.19	TRUE	FALSE	FALSE	FALSE	0.05	0.14	0.002	0.0077	-0.34	0.33	0.89	0.01	0.18
fat	IV	FBgn0036671	CG9951	39888	24.2	479.39	0.0012	0.044	0.0069	0.25	-2	0.34	TRUE	FALSE	FALSE	FALSE	0.14	0.28	0.12	0.2	-0.85	0.85	1	0.44	0.69
fat	IV	FBgn0261341	verm	40149	24.88	189.93	0.024	0.003	0.07	0.042	-1.5	0.77	TRUE	FALSE	FALSE	FALSE	0.13	0.28	0.8	0.86	-0.15	0.87	1	0.028	0.26
fat	IV	FBgn0036208	CG10361	39333	31.01	315.52	0.0047	0.017	0.02	0.14	-0.33	0.6	TRUE	FALSE	TRUE	FALSE	0.45	0.62	0.046	0.097	-0.22	0.068	0.47	0.0012	0.059
fat	IV	FBgn0030136	RpS28b	31897	32.74	23417.4	3.7e-05	0.23	0.00044	0.55	-0.67	0.25	TRUE	FALSE	TRUE	FALSE	0.58	0.73	7.2e-06	9.7e-05	-0.77	0.091	0.53	0.087	0.37
fat	IV	FBgn0010391	Gtp-bp	47251	30.13	2497.34	3.3e-05	0.24	0.0004	0.56	-0.43	0.24	TRUE	FALSE	TRUE	FALSE	0.24	0.41	1.1e-06	2.3e-05	-0.56	0.037	0.36	0.37	0.65
fat	IV	FBgn0025683	CG3164	33171	31.45	19539.5	1e-05	0.33	0.00016	0.64	-0.43	0.24	TRUE	FALSE	TRUE	FALSE	0.79	0.88	2.2e-05	0.00022	-0.41	0.003	0.15	0.083	0.36
fat	IV	FBgn0052372	ltl	38845	27.3	1539.99	6.6e-05	0.19	0.00068	0.52	-0.9	0.26	TRUE	TRUE	FALSE	FALSE	2e-06	0.00011	0.00024	0.0014	0.8	1	1	0.064	0.33
fat	IV	FBgn0030605	ND-B18	32434	29.06	661.48	0.022	0.0038	0.065	0.051	-0.23	0.69	TRUE	FALSE	TRUE	FALSE	0.24	0.41	0.44	0.55	-0.071	0.082	0.51	0.039	0.28
fat	IV	FBgn0029885	CG3224	31600	26.21	411.46	0.003	0.027	0.015	0.18	-0.42	0.39	TRUE	FALSE	FALSE	FALSE	0.078	0.19	1e-05	0.00013	-0.74	0.46	0.98	0.2	0.49
fat	IV	FBgn0040321	GNBP3	39020	25.97	4688.69	0.0077	0.012	0.03	0.11	-0.52	0.74	TRUE	FALSE	FALSE	FALSE	0.099	0.22	0.6	0.69	-0.094	0.64	1	0.11	0.39
fat	IV	FBgn0030482	CG1673	32297	30.26	2938.47	2.9e-05	0.26	0.00037	0.58	-0.41	0.27	TRUE	FALSE	TRUE	FALSE	0.44	0.62	3.2e-06	5.1e-05	-0.49	0.011	0.23	0.016	0.22
fat	IV	FBgn0027865	Tsp96F	43127	26.17	319.64	0.00075	0.067	0.0048	0.32	-0.85	0.43	TRUE	FALSE	FALSE	FALSE	0.022	0.082	0.61	0.7	-0.11	0.9	1	0.42	0.68
fat	IV	FBgn0038407	CG6126	41967	27.61	1915.13	0.00023	0.12	0.0019	0.42	-0.43	0.37	TRUE	FALSE	TRUE	FALSE	0.52	0.68	3.2e-05	0.00029	-0.52	0.036	0.36	0.55	0.77
fat	IV	FBgn0033529	CG17765	36111	29.02	496.49	0.0017	0.041	0.0092	0.24	-0.56	0.31	TRUE	FALSE	FALSE	FALSE	0.51	0.67	0.013	0.037	-0.41	0.19	0.71	0.14	0.44
fat	IV	FBgn0031908	CG5177	34017	34.22	370.82	2.9e-07	0.63	1e-05	0.83	-0.7	0.12	TRUE	FALSE	TRUE	FALSE	0.33	0.51	4e-06	5.9e-05	-0.57	0.049	0.41	0.46	0.7
fat	IV	FBgn0030251	CG2145	32027	30.05	4109.8	2.5e-06	0.46	5.3e-05	0.73	-0.77	0.21	TRUE	TRUE	FALSE	FALSE	2.1e-06	0.00011	0.0087	0.026	0.33	1	1	0.079	0.35
fat	IV	FBgn0015571	alpha-Est3	40907	28.84	1607.14	2.3e-05	0.28	0.00031	0.6	-0.42	0.26	TRUE	FALSE	FALSE	FALSE	8.9e-05	0.0016	0.17	0.27	0.1	0.95	1	0.73	0.87
fat	IV	FBgn0031818	CG9536	33904	23.83	546.48	1.6e-05	0.31	0.00023	0.63	-1.5	0.14	TRUE	FALSE	FALSE	FALSE	0.13	0.28	2.4e-07	7.3e-06	-2	0.72	1	0.58	0.79
fat	IV	FBgn0033308	CG8736	35841	23.8	1.6	4.2e-05	0.24	0.00048		-2.5	0.42	TRUE	TRUE	FALSE	FALSE	0.0024	0.017	0.7	0.78	-0.18	1	1	0.61
fat	IV	FBgn0031285	CG3662	33260	24.89	3253.23	0.00073	0.072	0.0047	0.33	-1.5	0.28	TRUE	TRUE	FALSE	FALSE	0.00017	0.0026	0.017	0.044	0.98	1	1	0.032	0.27
fat	IV	FBgn0032482	Pect	34716	30.74	5369.72	0.034	0.0025	0.091	0.037	-0.18	0.74	TRUE	FALSE	FALSE	FALSE	0.00023	0.0032	0.00055	0.0028	0.33	0.93	1	0.0077	0.16
fat	IV	FBgn0086784	stmA	35865	27.04	1386.82	0.0004	0.1	0.003	0.38	-0.71	0.28	TRUE	FALSE	FALSE	FALSE	0.0033	0.022	4.1e-08	1.8e-06	-1.5	0.96	1	0.052	0.31
fat	IV	FBgn0031066	COX6B	32989	32.6	2759.29	0.035	0.0025	0.093	0.037	-0.4	0.56	TRUE	FALSE	FALSE	TRUE	0.0053	0.03	0.04	0.087	0.39	0.96	1	0.0013	0.062
fat	IV	FBgn0026316	Ubc10	37035	29.59	497.51	0.0004	0.1	0.003	0.39	-0.41	0.22	TRUE	TRUE	FALSE	FALSE	3.6e-05	0.00085	0.0033	0.012	0.32	1	1	0.72	0.87
fat	IV	FBgn0012037	Ance	34805	28.09	2270.17	0.00011	0.18	0.0011	0.5	-1.2	0.35	TRUE	TRUE	FALSE	FALSE	0.00062	0.0064	0.36	0.48	0.23	1	1	0.3	0.59
fat	IV	FBgn0029925	CG3040	31642	26.6	292.57	0.00032	0.12	0.0024	0.41	-0.8	0.23	TRUE	FALSE	FALSE	FALSE	0.0077	0.039	0.83	0.88	-0.038	0.94	1	0.87	0.94
fat	IV	FBgn0010265	RpS13	34149	33.06	12917.7	0.012	0.0097	0.041	0.096	-0.41	0.51	TRUE	FALSE	FALSE	FALSE	0.38	0.55	0.00073	0.0035	-0.6	0.24	0.79	0.019	0.24
fat	IV	FBgn0037102	CRIF	40395	26.57	160.57	0.0017	0.049	0.0091	0.26	-0.52	0.5	TRUE	FALSE	FALSE	FALSE	0.39	0.56	0.025	0.059	-0.34	0.21	0.75	0.23	0.53
fat	IV	FBgn0032217	CG4972	34388	30.47	891.08	3.5e-05	0.27	0.00042	0.6	-0.44	0.28	TRUE	FALSE	TRUE	FALSE	0.88	0.93	5.6e-05	0.00046	-0.42	0.0052	0.17	0.41	0.67
fat	IV	FBgn0028646	aralar1	43616	35.03	5106.45	0.0001	0.2	0.00099	0.52	-0.24	0.28	TRUE	FALSE	TRUE	FALSE	0.45	0.62	1.1e-05	0.00013	-0.29	0.00025	0.089	0.049	0.3
fat	IV	FBgn0031914	CG5973	34023	30.24	1760.17	0.018	0.0071	0.056	0.077	-0.25	0.47	TRUE	FALSE	TRUE	TRUE	0.99	0.99	0.018	0.046	-0.24	0.01	0.22	0.0028	0.092
fat	IV	FBgn0031069	Pmp70	32992	31.97	7535.82	3.5e-09	0.89	4.7e-07	0.96	-0.83	0.037	TRUE	FALSE	TRUE	FALSE	0.19	0.35	6.5e-08	2.5e-06	-0.68	0.046	0.39	0.38	0.65
fat	IV	FBgn0032595	CG17996	34998	25.23	173.31	0.0044	0.028	0.019	0.19	-1	0.43	TRUE	FALSE	FALSE	FALSE	0.7	0.82	0.014	0.038	-0.84	0.35	0.9	0.16	0.45
fat	IV	FBgn0039485	CG17189	43263	26.48	114.81	0.013	0.012	0.044	0.11	-1.1	0.81	TRUE	FALSE	FALSE	FALSE	0.081	0.2	0.88	0.92	-0.059	0.89	1	0.46	0.71
fat	IV	FBgn0021856	l(2)k14505	35399	25.8	253.1	0.017	0.0092	0.054	0.093	-1.4	0.43	TRUE	FALSE	FALSE	FALSE	0.33	0.51	0.24	0.35	-0.62	0.7	1	0.42	0.67
fat	IV	FBgn0028526	CG15293	34828	30.9	14031.9	6.6e-05	0.26	0.00069	0.58	-0.44	0.27	TRUE	FALSE	FALSE	FALSE	0.068	0.17	0.025	0.06	-0.21	0.18	0.71	0.013	0.2
fat	IV	FBgn0033226	CG1882	35733	30.37	1923.5	3.2e-06	0.52	6.4e-05	0.77	-0.62	0.16	TRUE	FALSE	FALSE	FALSE	0.0053	0.03	0.042	0.091	-0.2	0.72	1	0.53	0.76
fat	IV	FBgn0015781	P5cr	42284	29.13	368.6	0.00079	0.095	0.005	0.37	-0.46	0.3	TRUE	FALSE	FALSE	FALSE	0.00055	0.0058	0.072	0.14	0.22	0.97	1	0.28	0.57
fat	IV	FBgn0050296	RIC-3	37384	26.23	183.99	0.019	0.0085	0.059	0.088	-0.57	0.67	TRUE	FALSE	FALSE	FALSE	0.53	0.69	0.11	0.2	-0.37	0.33	0.89	0.054	0.31
fat	IV	FBgn0037530	EMC1	40933	30.46	3627.22	4.2e-06	0.5	7.8e-05	0.76	-0.46	0.088	TRUE	FALSE	TRUE	FALSE	0.61	0.75	1e-06	2.3e-05	-0.51	0.0045	0.17	0.53	0.75
fat	IV	FBgn0010078	RpL23	37628	32.88	35801	8.7e-05	0.25	0.00087	0.57	-0.41	0.29	TRUE	FALSE	TRUE	FALSE	0.73	0.84	3e-05	0.00028	-0.45	0.009	0.21	0.2	0.49
fat	IV	FBgn0003065	CG2150	43745	32.8	1.39	1.4e-07	0.76	6e-06		-0.61	0.092	TRUE	FALSE	TRUE	FALSE	0.12	0.26	3.7e-09	2.8e-07	-0.78	0.056	0.43	0.36
fat	IV	FBgn0037433	CG17919	40780	31.22	491.81	0.035	0.0044	0.094	0.056	-0.22	0.81	TRUE	FALSE	FALSE	FALSE	0.00031	0.0039	0.0008	0.0038	0.38	0.96	1	0.12	0.41
fat	IV	FBgn0003965	v	32026	29.6	2270.35	0.00046	0.13	0.0033	0.43	-0.32	0.46	TRUE	FALSE	FALSE	FALSE	0.015	0.061	0.64	0.74	-0.035	0.3	0.86	0.0083	0.16
fat	IV	FBgn0033978	Cyp6a23	36661	29.37	1803.99	0.00092	0.096	0.0056	0.37	-0.33	0.33	TRUE	FALSE	FALSE	FALSE	0.012	0.052	1	1	-7e-05	0.45	0.97	0.0049	0.12
fat	IV	FBgn0027496	epsilonCOP	33908	28.27	840.03	3e-05	0.35	0.00037	0.65	-0.49	0.18	TRUE	FALSE	TRUE	FALSE	0.81	0.89	6.1e-05	0.00049	-0.46	0.011	0.23	0.65	0.83
fat	IV	FBgn0038966	pinta	42635	29.58	1113.81	8.4e-05	0.26	0.00084	0.58	-0.41	0.3	TRUE	FALSE	TRUE	FALSE	0.34	0.52	0.0017	0.007	-0.3	0.03	0.33	0.032	0.27
fat	IV	FBgn0038211	CG9649	41727	26.41	2518.66	0.00011	0.24	0.001	0.57	-0.88	0.35	TRUE	FALSE	FALSE	FALSE	0.23	0.4	0.0052	0.017	-0.56	0.46	0.98	0.16	0.46
fat	IV	FBgn0038105	yellow-f2	41596	28.07	2248.24	0.00011	0.25	0.001	0.57	-0.73	0.37	TRUE	FALSE	FALSE	FALSE	0.042	0.13	0.08	0.15	-0.27	0.71	1	0.32	0.6
fat	IV	FBgn0036821	CG3961	40056	30.71	2244.01	0.0038	0.045	0.017	0.25	-0.25	0.38	TRUE	FALSE	FALSE	FALSE	0.048	0.14	6.3e-06	8.6e-05	-0.48	0.16	0.66	0.023	0.25
fat	IV	FBgn0027528	goe	32660	29.54	1444.2	1.4e-06	0.63	3.4e-05	0.83	-0.6	0.091	TRUE	FALSE	TRUE	FALSE	0.34	0.52	2.1e-05	0.00021	-0.48	0.039	0.36	0.023	0.25
fat	IV	FBgn0010350	CdsA	43950	28.78	1268.2	0.00043	0.15	0.0031	0.46	-0.81	0.29	TRUE	FALSE	FALSE	FALSE	0.019	0.075	0.5	0.61	-0.13	0.89	1	0.096	0.38
fat	IV	FBgn0038552	Alg1	42146	29.28	1957.68	0.00035	0.17	0.0027	0.49	-0.41	0.32	TRUE	FALSE	FALSE	FALSE	0.16	0.31	0.031	0.07	-0.22	0.14	0.64	0.42	0.67
fat	IV	FBgn0052702	Cubn	326235	31.03	13008.8	2.8e-05	0.38	0.00035	0.67	-0.41	0.25	TRUE	FALSE	TRUE	FALSE	0.16	0.31	5e-07	1.3e-05	-0.56	0.044	0.39	0.3	0.59
fat	IV	FBgn0033032	kune	35504	24.65	323.59	1.4e-05	0.44	0.00022	0.71	-2.4	0.11	TRUE	TRUE	FALSE	FALSE	0.00017	0.0026	0.45	0.56	0.31	1	1	0.68	0.85
fat	IV	FBgn0039328	CHKov2	43068	26.69	125.81	0.0065	0.032	0.026	0.21	-0.6	0.53	TRUE	FALSE	FALSE	FALSE	0.64	0.77	0.027	0.063	-0.47	0.23	0.77	0.054	0.31
fat	IV	FBgn0004907	14-3-3zeta	36059	26.8	8646.96	0.0031	0.056	0.015	0.29	-4.4	0.4	TRUE	FALSE	FALSE	FALSE	0.047	0.14	0.69	0.77	-0.52	0.97	1	0.051	0.31
fat	IV	FBgn0035692	Sf3b6	38720	23.78	420.86	0.007	0.031	0.028	0.2	-0.5	0.41	TRUE	FALSE	FALSE	FALSE	0.57	0.72	0.0011	0.0051	-0.64	0.19	0.73	0.33	0.61
fat	IV	FBgn0011760	ctp	31405	29.45	1613.68	0.036	0.0059	0.094	0.069	-0.3	0.81	TRUE	FALSE	FALSE	FALSE	0.13	0.28	0.96	0.97	-0.0069	0.41	0.95	0.052	0.31
fat	IV	FBgn0010228	HmgZ	37480	30.48	824.73	5e-05	0.33	0.00055	0.65	-1	0.26	TRUE	FALSE	FALSE	FALSE	0.0071	0.037	0.33	0.44	-0.19	0.95	1	0.062	0.33
fat	IV	FBgn0034797	nahoda	37641	29.32	907.28	9.4e-06	0.48	0.00015	0.74	-0.84	0.13	TRUE	FALSE	TRUE	FALSE	0.74	0.85	3.8e-06	5.7e-05	-0.9	0.084	0.51	0.25	0.54
fat	IV	FBgn0039159	mRpS24	42870	23.56	186.03	0.0012	0.1	0.0069	0.38	-1.5	0.31	TRUE	FALSE	FALSE	FALSE	0.076	0.19	0.25	0.36	-0.46	0.89	1	0.48	0.72
fat	IV	FBgn0034968	RpL12	45329	33.28	20914.7	0.00067	0.14	0.0044	0.44	-0.39	0.32	TRUE	FALSE	TRUE	FALSE	0.63	0.77	0.0031	0.011	-0.32	0.026	0.31	0.077	0.35
fat	IV	FBgn0032494	CG5945	34729	31.8	3776.02	0.031	0.0082	0.084	0.085	-0.25	0.71	TRUE	FALSE	FALSE	FALSE	0.35	0.53	0.0017	0.0069	-0.4	0.11	0.57	0.059	0.32
fat	IV	FBgn0039755	CG15531	43592	32.09	12383	0.0034	0.059	0.016	0.29	-0.31	0.53	TRUE	FALSE	TRUE	FALSE	0.49	0.66	0.028	0.065	-0.22	0.032	0.34	0.28	0.57
fat	IV	FBgn0039897	CG1674	43780	31.66	319.52	1.4e-06	0.67	3.4e-05	0.85	-0.58	0.13	TRUE	FALSE	FALSE	FALSE	0.014	0.059	0.0043	0.014	-0.27	0.4	0.94	0.43	0.68
fat	IV	FBgn0031637	mxt	33686	27.3	2013.48	0.00038	0.19	0.0028	0.52	-1	0.24	TRUE	FALSE	FALSE	FALSE	0.11	0.25	0.059	0.12	-0.46	0.73	1	0.26	0.55
fat	IV	FBgn0032472	CG9928	34704	30.01	1948.58	0.011	0.025	0.04	0.18	-0.28	0.63	TRUE	FALSE	FALSE	FALSE	0.2	0.36	0.37	0.49	-0.092	0.15	0.66	0.0092	0.17
fat	IV	FBgn0039114	Lsd-1	42810	29.92	44423.9	0.0082	0.033	0.031	0.21	-0.54	0.66	TRUE	TRUE	FALSE	FALSE	0.00013	0.0021	0.001	0.0046	0.71	1	1	0.11	0.39
fat	IV	FBgn0035471	Sc2	38457	32.59	6717.59	0.00096	0.13	0.0058	0.43	-0.28	0.44	TRUE	FALSE	TRUE	FALSE	0.14	0.28	0.098	0.18	-0.13	0.045	0.39	0.29	0.58
fat	IV	FBgn0036837	CG18135	40073	30.19	23511	0.0084	0.034	0.031	0.21	-0.4	0.56	TRUE	TRUE	FALSE	FALSE	1.1e-06	7.3e-05	9.8e-07	2.2e-05	0.98	1	1	0.01	0.18
fat	IV	FBgn0039172	Spase22-23	42885	27.84	620.87	0.014	0.022	0.046	0.16	-0.37	0.34	TRUE	FALSE	FALSE	FALSE	0.0059	0.032	0.11	0.19	0.23	0.9	1	0.41	0.67
fat	IV	FBgn0050163	Cpr60D	246492	28.22	71.27	0.0035	0.063	0.017	0.31	-0.69	0.54	TRUE	FALSE	FALSE	FALSE	0.56	0.72	0.00056	0.0029	-0.86	0.28	0.84	0.025	0.25
fat	IV	FBgn0044511	mRpS21	318249	25.53	300.37	0.00025	0.23	0.002	0.56	-0.53	0.27	TRUE	FALSE	TRUE	FALSE	0.88	0.93	0.00016	0.001	-0.56	0.036	0.36	0.76	0.89
fat	IV	FBgn0034237	eIF3b	36981	31.92	10223.7	0.012	0.025	0.042	0.18	-0.17	0.31	TRUE	FALSE	TRUE	FALSE	0.73	0.84	0.035	0.077	-0.14	0.0012	0.13	0.082	0.36
fat	IV	FBgn0051862	CG31862	318989	24.45	0.14	6.4e-08	0.86	3.7e-06		-4.6	0.023	TRUE	TRUE	FALSE	FALSE	9.8e-07	7e-05	0.16	0.26	0.76	1	1	0.92
fat	IV	FBgn0017572	Mo25	39858	30.75	553.45	0.0025	0.081	0.012	0.35	-0.25	0.25	TRUE	FALSE	TRUE	FALSE	0.19	0.35	0.13	0.22	-0.11	0.026	0.31	0.35	0.63
fat	IV	FBgn0264695	Mhc	35007	31.03	16981	9.2e-05	0.32	0.0009	0.63	-1	0.23	TRUE	FALSE	FALSE	FALSE	0.088	0.21	0.023	0.056	-0.51	0.73	1	0.37	0.64
fat	IV	FBgn0027619	eIF3j	36037	31.39	1791.21	0.009	0.033	0.033	0.21	-0.23	0.41	TRUE	FALSE	FALSE	FALSE	0.00072	0.0072	0.011	0.031	0.22	0.84	1	0.07	0.34
fat	IV	FBgn0000422	Ddc	35190	28.83	651.14	0.0081	0.036	0.031	0.22	-0.29	0.56	TRUE	FALSE	FALSE	FALSE	0.012	0.054	0.35	0.47	0.094	0.63	1	0.12	0.41
fat	IV	FBgn0030329	prtp	32124	30.98	1628.56	0.0023	0.085	0.012	0.35	-0.26	0.37	TRUE	FALSE	TRUE	FALSE	0.11	0.25	0.24	0.35	-0.09	0.067	0.47	0.16	0.45
fat	IV	FBgn0010622	DCTN3-p24	46074	28.27	223.12	0.0031	0.072	0.015	0.33	-0.52	0.31	TRUE	FALSE	FALSE	FALSE	0.059	0.16	0.57	0.68	-0.086	0.66	1	0.17	0.46
fat	IV	FBgn0259740	CG42394	7354424	25.17	117.4	0.036	0.0083	0.094	0.086	-0.35	0.85	TRUE	FALSE	FALSE	FALSE	0.0016	0.013	0.008	0.024	0.46	0.98	1	0.036	0.27
fat	IV	FBgn0039543	CG12428	43332	30.14	4232.65	2.4e-05	0.45	0.00032	0.72	-0.47	0.18	TRUE	FALSE	TRUE	FALSE	0.52	0.68	3.9e-06	5.8e-05	-0.55	0.02	0.28	0.11	0.4
fat	IV	FBgn0036020	CG8336	39121	25.59	365.55	0.002	0.094	0.01	0.37	-0.69	0.3	TRUE	FALSE	FALSE	FALSE	0.19	0.35	3e-05	0.00028	-1.1	0.55	1	0.7	0.86
fat	IV	FBgn0266375	IP3K2	32285	25.03	1406.37	0.0057	0.048	0.024	0.26	-0.47	0.47	TRUE	FALSE	FALSE	FALSE	0.43	0.6	0.062	0.12	-0.3	0.21	0.76	0.031	0.27
fat	IV	FBgn0031057	Ubqn	32977	30.19	3916.69	0.015	0.022	0.048	0.16	-0.27	0.33	TRUE	FALSE	FALSE	FALSE	0.00031	0.0039	0.002	0.0078	0.36	0.97	1	0.0055	0.13
fat	IV	FBgn0052528	parvin	32990	30.17	1102.3	0.02	0.016	0.062	0.13	-0.28	0.38	TRUE	FALSE	FALSE	FALSE	0.07	0.18	0.86	0.91	0.019	0.38	0.93	0.14	0.43
fat	IV	FBgn0029765	CG16756	31460	25.28	4057.48	0.0049	0.055	0.021	0.28	-0.37	0.6	TRUE	FALSE	TRUE	FALSE	0.56	0.71	0.029	0.067	-0.27	0.073	0.49	0.036	0.27
fat	IV	FBgn0017482	T3dh	37551	30.14	720.34	0.0021	0.096	0.011	0.37	-0.32	0.43	TRUE	FALSE	TRUE	FALSE	0.83	0.9	0.0011	0.0048	-0.35	0.012	0.23	0.15	0.44
fat	IV	FBgn0037298	CG2604	40623	32.01	7014.85	0.028	0.012	0.078	0.11	-0.17	0.64	TRUE	FALSE	TRUE	FALSE	0.36	0.54	0.0016	0.0067	-0.26	0.012	0.23	0.088	0.37
fat	IV	FBgn0021795	Tapdelta	45680	31.49	1344.01	0.0039	0.066	0.018	0.31	-0.31	0.37	TRUE	FALSE	TRUE	FALSE	0.69	0.81	0.014	0.037	-0.26	0.024	0.3	0.15	0.44
fat	IV	FBgn0033320	CG8586	35854	28.85	5265.91	0.00061	0.18	0.0041	0.5	-0.38	0.39	TRUE	FALSE	FALSE	FALSE	0.00072	0.0072	0.12	0.21	0.15	0.92	1	0.17	0.46
fat	IV	FBgn0034277	OstDelta	37029	31.36	1449.83	6.5e-05	0.38	0.00068	0.67	-0.41	0.11	TRUE	FALSE	TRUE	FALSE	0.13	0.27	0.0089	0.026	-0.23	0.079	0.5	0.44	0.69
fat	IV	FBgn0002579	RpL36	31009	32.56	30102.9	0.00085	0.16	0.0053	0.47	-0.57	0.33	TRUE	FALSE	FALSE	FALSE	0.14	0.29	8.3e-06	0.00011	-0.87	0.44	0.97	0.075	0.35
fat	IV	FBgn0261808	cu	41339	27.39	2483.72	0.017	0.022	0.055	0.16	-0.5	0.49	TRUE	FALSE	FALSE	FALSE	0.36	0.54	0.21	0.32	-0.25	0.37	0.92	0.036	0.27
fat	IV	FBgn0036199	Bmcp	39322	26.77	1157.28	0.0046	0.065	0.02	0.31	-0.54	0.37	TRUE	FALSE	FALSE	FALSE	0.12	0.25	0.37	0.49	-0.15	0.58	1	0.093	0.38
fat	IV	FBgn0038947	Sar1	42615	31.97	3799.78	0.03	0.013	0.084	0.11	-0.17	0.5	TRUE	FALSE	TRUE	FALSE	0.78	0.88	0.013	0.037	-0.2	0.0036	0.16	0.0094	0.17
fat	IV	FBgn0034718	wdp	37548	30.28	1302.06	0.0002	0.28	0.0017	0.6	-0.38	0.21	TRUE	FALSE	FALSE	FALSE	0.031	0.1	0.19	0.3	-0.11	0.28	0.83	0.089	0.37
fat	IV	FBgn0037744	CG8417	41192	31.03	2885.8	0.0072	0.05	0.028	0.27	-0.22	0.47	TRUE	FALSE	FALSE	FALSE	0.00027	0.0036	0.0035	0.012	0.25	0.89	1	0.081	0.35
fat	IV	FBgn0014869	Pglym78	43447	34.23	3547.59	0.019	0.022	0.059	0.17	-0.18	0.39	TRUE	TRUE	FALSE	FALSE	9.7e-07	7e-05	4.2e-07	1.1e-05	0.55	1	1	0.02	0.24
fat	IV	FBgn0036106	CG6409	39220	33.08	4757.67	0.0004	0.24	0.003	0.56	-0.51	0.3	TRUE	FALSE	FALSE	FALSE	0.041	0.13	0.24	0.35	-0.14	0.57	1	0.42	0.67
fat	IV	FBgn0028968	gammaCOP	43717	30.8	2029.89	0.00043	0.24	0.0031	0.56	-0.4	0.19	TRUE	FALSE	FALSE	FALSE	0.061	0.16	1.3e-06	2.7e-05	-0.66	0.28	0.84	0.57	0.78
fat	IV	FBgn0035917	Zasp66	38988	30.43	1199.91	0.0056	0.065	0.023	0.31	-0.31	0.45	TRUE	FALSE	FALSE	FALSE	0.024	0.087	0.74	0.81	0.033	0.5	1	0.19	0.48
fat	IV	FBgn0035087	CG2765	37994	29.54	20877.8	0.0048	0.072	0.021	0.33	-0.32	0.45	TRUE	FALSE	FALSE	FALSE	0.011	0.049	0.44	0.55	0.079	0.66	1	0.066	0.33
fat	IV	FBgn0031436	ND-B17.2	33443	31.42	1035.4	0.017	0.027	0.054	0.18	-0.28	0.52	TRUE	FALSE	FALSE	FALSE	0.14	0.29	0.65	0.74	-0.049	0.24	0.8	0.041	0.29
fat	IV	FBgn0266186	Vamp7	36015	26.8	839.98	0.0016	0.13	0.009	0.44	-0.54	0.27	TRUE	FALSE	FALSE	FALSE	0.21	0.38	0.075	0.14	-0.27	0.35	0.91	0.17	0.47
fat	IV	FBgn0030731	Mfe2	32582	33.93	8546.67	0.0011	0.17	0.0065	0.49	-0.24	0.38	TRUE	FALSE	TRUE	FALSE	0.78	0.87	0.0027	0.0099	-0.22	0.0011	0.13	0.21	0.5
fat	IV	FBgn0028396	TotA	44121	29	1714.8	0.0077	0.055	0.03	0.28	-0.64	0.77	TRUE	TRUE	FALSE	FALSE	0.0006	0.0062	0.0098	0.029	0.62	1	1	0.0016	0.07
fat	IV	FBgn0028546	ics	34774	30.43	419.86	0.00095	0.18	0.0057	0.51	-0.38	0.24	TRUE	FALSE	TRUE	FALSE	0.37	0.55	0.016	0.042	-0.26	0.065	0.46	0.29	0.58
fat	IV	FBgn0030511	CG11158	32327	24.07	220.78	0.0026	0.11	0.013	0.41	-1.4	0.43	TRUE	FALSE	FALSE	FALSE	0.56	0.72	0.00041	0.0022	-1.7	0.49	1	0.23	0.52
fat	IV	FBgn0038465	Irc	42049	26.52	8443.55	1.8e-06	0.74	4.1e-05	0.89	-0.76	0.085	TRUE	TRUE	FALSE	FALSE	1.3e-05	0.00039	0.16	0.25	0.16	1	1	0.16	0.46
fat	IV	FBgn0028473	Non1	35963	27.6	29109.8	0.0042	0.088	0.019	0.36	-0.86	0.46	TRUE	FALSE	FALSE	FALSE	0.029	0.1	3.5e-06	5.4e-05	-1.7	0.92	1	0.19	0.48
fat	IV	FBgn0022344	CG10340	42020	27.6	600.05	0.0031	0.11	0.015	0.39	-0.41	0.3	TRUE	FALSE	FALSE	FALSE	0.00035	0.0041	0.011	0.032	0.34	0.99	1	0.32	0.6
fat	IV	FBgn0010470	Fkbp14	37449	32.02	1680.92	0.0054	0.078	0.023	0.34	-0.22	0.39	TRUE	FALSE	FALSE	FALSE	6.5e-05	0.0013	0.00058	0.0029	0.29	0.95	1	0.039	0.28
fat	IV	FBgn0037515	Sp7	40918	26.63	1218.17	9.3e-05	0.41	0.00092	0.69	-0.94	0.22	TRUE	FALSE	FALSE	FALSE	0.015	0.062	0.24	0.35	-0.23	0.91	1	0.34	0.62
fat	IV	FBgn0035165	CG13887	38096	30.26	1505.94	0.029	0.019	0.082	0.15	-0.42	0.42	TRUE	FALSE	FALSE	FALSE	0.16	0.32	0.75	0.82	-0.056	0.53	1	0.11	0.4
fat	IV	FBgn0038400	CG5903	41959	31.54	1597.05	0.014	0.04	0.046	0.24	-0.23	0.44	TRUE	FALSE	FALSE	FALSE	0.05	0.15	0.82	0.87	0.02	0.23	0.77	0.077	0.35
fat	IV	FBgn0001624	dlg1	32083	25.09	1956.93	0.0082	0.06	0.031	0.3	-1.1	0.4	TRUE	FALSE	FALSE	FALSE	0.51	0.67	0.059	0.12	-0.75	0.51	1	0.11	0.39
fat	IV	FBgn0037936	CG6908	41410	29.62	335.6	8.3e-05	0.43	0.00083	0.71	-0.64	0.23	TRUE	TRUE	FALSE	FALSE	7.8e-07	5.9e-05	3.9e-05	0.00035	0.69	1	1	0.69	0.85
fat	IV	FBgn0036505	CG7945	39679	26.93	315.93	0.0012	0.18	0.0068	0.51	-0.52	0.28	TRUE	FALSE	FALSE	FALSE	0.31	0.49	4.7e-05	0.0004	-0.72	0.23	0.78	0.23	0.52
fat	IV	FBgn0038294	Mf	41824	35.22	2756.62	0.0055	0.083	0.023	0.35	-0.28	0.45	TRUE	FALSE	TRUE	FALSE	0.22	0.39	0.00011	0.00079	-0.44	0.085	0.51	0.1	0.39
fat	IV	FBgn0027786	Mtch	38026	31.53	1648.27	0.005	0.091	0.021	0.37	-0.19	0.25	TRUE	FALSE	FALSE	FALSE	0.002	0.015	0.07	0.14	0.11	0.3	0.86	0.56	0.78
fat	IV	FBgn0000592	Est-6	39392	30.67	2123.63	0.00091	0.22	0.0056	0.54	-0.42	0.29	TRUE	TRUE	FALSE	FALSE	1.3e-06	8.5e-05	9.6e-06	0.00012	0.64	1	1	0.073	0.34
fat	IV	FBgn0035266	Gk2	38221	32.81	7289.56	0.0057	0.087	0.023	0.36	-0.21	0.44	TRUE	FALSE	TRUE	FALSE	0.049	0.14	0.87	0.91	-0.011	0.072	0.48	0.14	0.44
fat	IV	FBgn0022246	Rpp30	44392	24.07	101.02	4.3e-05	0.51	0.00049	0.76	-2.2	0.15	TRUE	FALSE	FALSE	FALSE	0.78	0.87	0.0001	0.00073	-2	0.38	0.93	0.85	0.93
fat	IV	FBgn0037892	mRpL40	41364	28.06	203.32	5.4e-06	0.71	9.7e-05	0.87	-0.76	0.077	TRUE	FALSE	TRUE	FALSE	0.57	0.72	2.8e-05	0.00027	-0.67	0.082	0.51	0.93	0.97
fat	IV	FBgn0010015	CanA1	43670	24.76	122.39	0.002	0.17	0.011	0.49	-4.6	0.37	TRUE	FALSE	FALSE	FALSE	0.067	0.17	0.4	0.51	-1.1	0.95	1	0.22	0.51
fat	IV	FBgn0001491	l(1)10Bb	32069	23.62	241.63	0.0018	0.18	0.0097	0.5	-1.4	0.4	TRUE	FALSE	FALSE	FALSE	0.025	0.089	0.84	0.89	-0.079	0.96	1	0.43	0.68
fat	IV	FBgn0037547	CG7910	40956	33.92	24406	0.00028	0.35	0.0022	0.66	-0.36	0.27	TRUE	FALSE	FALSE	FALSE	0.0011	0.0098	1.1e-08	6.3e-07	-0.81	0.81	1	0.57	0.78
fat	IV	FBgn0262125	Sec23	40694	30.64	3709.21	0.00075	0.26	0.0048	0.58	-0.34	0.27	TRUE	FALSE	TRUE	FALSE	0.95	0.97	0.00089	0.0041	-0.33	0.0054	0.17	0.65	0.83
fat	IV	FBgn0030884	CG6847	32778	23.24	696.72	0.0083	0.076	0.031	0.34	-0.84	0.48	TRUE	FALSE	FALSE	FALSE	0.019	0.073	0.5	0.61	0.19	0.95	1	0.13	0.42
fat	IV	FBgn0259140	CG42255	39334	29.55	7763.25	0.00044	0.31	0.0032	0.63	-0.32	0.28	TRUE	FALSE	TRUE	FALSE	0.85	0.91	0.00025	0.0015	-0.34	0.0036	0.16	0.12	0.41
fat	IV	FBgn0035528	CG15012	38529	25.81	1270.87	3.7e-05	0.56	0.00044	0.79	-1.1	0.12	TRUE	FALSE	FALSE	FALSE	0.66	0.79	0.00014	0.00096	-0.93	0.22	0.76	0.29	0.58
fat	IV	FBgn0033906	ReepB	36569	30.05	3475.43	0.00019	0.4	0.0016	0.68	-0.82	0.21	TRUE	FALSE	FALSE	FALSE	0.19	0.35	0.013	0.037	-0.48	0.5	1	0.36	0.64
fat	IV	FBgn0011576	Cyp4d2	31192	27.18	1133.43	0.00045	0.31	0.0032	0.63	-0.79	0.3	TRUE	FALSE	FALSE	FALSE	0.0041	0.025	0.72	0.8	0.067	0.97	1	0.25	0.54
fat	IV	FBgn0037551	Gie	40961	29.92	392.87	0.00061	0.28	0.0041	0.6	-0.49	0.24	TRUE	FALSE	FALSE	FALSE	0.0069	0.036	0.87	0.91	0.019	0.83	1	0.19	0.49
fat	IV	FBgn0016075	vkg	33726	32.42	8864.78	0.002	0.18	0.011	0.5	-0.32	0.3	TRUE	FALSE	TRUE	FALSE	0.26	0.44	5.7e-05	0.00046	-0.46	0.068	0.47	0.071	0.34
fat	IV	FBgn0032810	CG13077	35252	24.25	413.35	0.018	0.044	0.057	0.25	-0.84	0.66	TRUE	FALSE	FALSE	FALSE	0.1	0.23	0.86	0.91	-0.057	0.83	1	0.11	0.4
fat	IV	FBgn0038181	CG9297	41688	31.95	819.8	0.0004	0.33	0.0029	0.64	-0.31	0.26	TRUE	FALSE	FALSE	FALSE	0.012	0.052	1.6e-07	5.4e-06	-0.59	0.29	0.85	0.26	0.55
fat	IV	FBgn0037943	CG14722	41419	23.8	430.51	0.007	0.092	0.028	0.37	-2	0.33	TRUE	FALSE	FALSE	FALSE	0.72	0.83	0.021	0.052	-1.7	0.5	1	0.52	0.75
fat	IV	FBgn0037270	eIF3f1	40587	31.03	4317.03	0.0088	0.079	0.033	0.34	-0.24	0.41	TRUE	FALSE	FALSE	FALSE	0.067	0.17	2.2e-05	0.00022	-0.46	0.16	0.67	0.34	0.62
fat	IV	FBgn0000092	CG2650	31252	27.6	33.24	0.027	0.032	0.076	0.21	-0.4	0.74	TRUE	FALSE	FALSE	FALSE	0.0027	0.019	9.3e-07	2.1e-05	-1.2	0.97	1	0.93	0.97
fat	IV	FBgn0037240	Cont	40553	30.65	1270.16	0.024	0.036	0.07	0.22	-0.14	0.29	TRUE	FALSE	TRUE	FALSE	0.4	0.58	0.23	0.33	-0.069	0.0012	0.13	0.26	0.55
fat	IV	FBgn0263977	Tim17b	3355107	27.21	1280.84	0.00099	0.25	0.0059	0.58	-0.48	0.28	TRUE	FALSE	FALSE	FALSE	0.071	0.18	3.4e-06	5.3e-05	-0.81	0.47	0.99	0.18	0.47
fat	IV	FBgn0030539	CG1368	32361	30.44	3.07	2.2e-05	0.63	0.0003		-1.2	0.18	TRUE	FALSE	FALSE	FALSE	0.86	0.92	1.3e-05	0.00015	-1.3	0.18	0.7	0.084
fat	IV	FBgn0028833	Dak1	43165	31.53	904.18	0.0032	0.15	0.015	0.46	-0.27	0.2	TRUE	FALSE	FALSE	FALSE	0.0025	0.018	0.14	0.23	0.12	0.68	1	0.14	0.43
fat	IV	FBgn0037592	CG11737	41009	24.75	1035.85	0.0012	0.24	0.0067	0.57	-0.92	0.24	TRUE	FALSE	FALSE	FALSE	0.11	0.24	7.1e-06	9.6e-05	-1.5	0.75	1	0.29	0.58
fat	IV	FBgn0260407	mRpS23	318977	27.53	123.84	4.2e-05	0.58	0.00048	0.81	-0.56	0.11	TRUE	FALSE	FALSE	FALSE	0.0072	0.037	0.28	0.39	-0.11	0.75	1	0.079	0.35
fat	IV	FBgn0033961	ND-B15	36640	32.02	742.81	0.022	0.045	0.065	0.25	-0.37	0.5	TRUE	FALSE	FALSE	FALSE	0.61	0.75	0.09	0.17	-0.26	0.14	0.63	0.064	0.33
fat	IV	FBgn0002930	nec	45908	31.43	3953.16	0.0042	0.14	0.019	0.45	-0.33	0.39	TRUE	FALSE	FALSE	FALSE	0.18	0.34	0.21	0.31	-0.13	0.16	0.67	0.039	0.28
fat	IV	FBgn0034387	Cyp12b2	37163	29.9	1686.94	4.7e-05	0.58	0.00053	0.81	-0.45	0.14	TRUE	FALSE	FALSE	FALSE	0.0005	0.0054	0.52	0.62	0.056	0.91	1	0.085	0.36
fat	IV	FBgn0034512	CG18067	37314	31.59	16196.9	0.036	0.029	0.094	0.19	-0.37	0.66	TRUE	FALSE	FALSE	FALSE	0.022	0.081	0.22	0.32	0.21	0.84	1	0.026	0.26
fat	IV	FBgn0266369	Mtp	35362	33.12	4598.86	0.0043	0.14	0.019	0.45	-0.21	0.35	TRUE	FALSE	FALSE	FALSE	0.00019	0.0027	0.0035	0.012	0.22	0.84	1	0.13	0.42
fat	IV	FBgn0035995	CG3529	39093	29.78	791.17	0.00054	0.34	0.0037	0.65	-0.43	0.19	TRUE	FALSE	TRUE	FALSE	0.41	0.59	0.0073	0.023	-0.31	0.074	0.49	0.36	0.63
fat	IV	FBgn0038912	CG6656	42576	24.81	189.21	0.012	0.079	0.041	0.34	-1.6	0.38	TRUE	FALSE	FALSE	FALSE	0.48	0.65	0.091	0.17	-1	0.61	1	0.23	0.52
fat	IV	FBgn0010352	Nc73EF	39899	35.2	11805.4	0.0018	0.22	0.0098	0.55	-0.22	0.26	TRUE	FALSE	TRUE	FALSE	0.34	0.52	0.037	0.081	-0.14	0.0041	0.16	0.077	0.35
fat	IV	FBgn0032715	CG17597	35140	29.21	2929.36	0.0052	0.14	0.022	0.44	-0.24	0.37	TRUE	FALSE	FALSE	FALSE	0.0035	0.023	0.14	0.23	0.12	0.57	1	0.56	0.77
fat	IV	FBgn0037358	elm	40695	27.84	1936.33	0.0013	0.27	0.0072	0.59	-0.6	0.18	TRUE	FALSE	FALSE	FALSE	0.45	0.62	0.014	0.038	-0.43	0.23	0.78	0.43	0.68
fat	IV	FBgn0032138	CG4364	34287	27.09	9005.07	0.012	0.085	0.042	0.35	-0.32	0.36	TRUE	FALSE	FALSE	FALSE	5.7e-05	0.0012	7.8e-09	4.9e-07	-1.2	1	1	0.19	0.49
fat	IV	FBgn0032205	CG4957	34374	25.37	116.08	0.026	0.046	0.074	0.26	-1.4	0.45	TRUE	FALSE	FALSE	FALSE	0.91	0.94	0.036	0.08	-1.3	0.39	0.94	0.28	0.57
fat	IV	FBgn0031544	CG17593	33573	29.16	1886.42	0.014	0.078	0.047	0.34	-0.24	0.27	TRUE	FALSE	FALSE	FALSE	0.0092	0.044	2.3e-06	4e-05	-0.6	0.56	1	0.8	0.9
fat	IV	FBgn0034051	Mlf	36750	23.91	749.73	0.0032	0.18	0.015	0.51	-1.4	0.29	TRUE	FALSE	FALSE	FALSE	0.82	0.89	0.0016	0.0065	-1.6	0.37	0.92	0.39	0.66
fat	IV	FBgn0033101	CG9436	35586	32.33	1885.05	1.7e-05	0.71	0.00025	0.87	-0.39	0.094	TRUE	FALSE	FALSE	FALSE	0.0082	0.041	0.12	0.21	-0.11	0.27	0.83	0.22	0.51
fat	IV	FBgn0030447	CG2200	32258	30.32	457.98	0.0037	0.18	0.017	0.5	-0.4	0.31	TRUE	FALSE	FALSE	FALSE	0.089	0.21	0.44	0.55	-0.097	0.43	0.96	0.55	0.76
fat	IV	FBgn0041180	Tep4	35248	33.16	11576.4	0.012	0.093	0.041	0.37	-0.18	0.4	TRUE	FALSE	TRUE	FALSE	0.034	0.11	0.66	0.75	0.029	0.092	0.54	0.16	0.45
fat	IV	FBgn0036551	CG17029	39740	28.1	603.79	0.004	0.18	0.018	0.5	-0.59	0.33	TRUE	FALSE	FALSE	FALSE	0.02	0.075	0.75	0.82	0.057	0.88	1	0.31	0.59
fat	IV	FBgn0263593	Lpin	35790	29.86	8362.21	0.00012	0.54	0.0011	0.78	-0.3	0.16	TRUE	FALSE	TRUE	FALSE	0.2	0.37	2.6e-06	4.5e-05	-0.42	0.0097	0.21	0.3	0.58
fat	IV	FBgn0004169	up	32314	28.46	2105.52	0.024	0.057	0.07	0.29	-1.3	0.43	TRUE	FALSE	FALSE	FALSE	0.023	0.083	0.3	0.42	0.56	0.97	1	0.17	0.47
fat	IV	FBgn0033214	CG1941	35718	25.36	231.75	0.00011	0.56	0.001	0.8	-0.72	0.16	TRUE	FALSE	FALSE	FALSE	0.23	0.41	3e-06	5e-05	-0.97	0.34	0.9	0.58	0.79
fat	IV	FBgn0052451	SPoCk	40495	27.29	3621.16	0.00038	0.43	0.0028	0.71	-0.52	0.1	TRUE	FALSE	FALSE	FALSE	0.00089	0.0083	0.22	0.33	0.15	0.97	1	0.14	0.43
fat	IV	FBgn0039252	CG11771	42984	30.03	1967.8	1.4e-05	0.75	0.0002	0.89	-0.35	0.052	TRUE	FALSE	TRUE	FALSE	0.19	0.35	3.4e-07	9.5e-06	-0.46	0.0062	0.18	0.83	0.92
fat	IV	FBgn0032293	Dpy-30L1	34480	25.81	37.86	0.012	0.1	0.041	0.39	-2.3	0.48	TRUE	FALSE	FALSE	FALSE	0.32	0.5	0.19	0.29	-1.1	0.76	1	0.9	0.95
fat	IV	FBgn0002069	AspRS	36420	31.5	2940.86	0.00015	0.53	0.0013	0.78	-0.3	0.1	TRUE	FALSE	FALSE	FALSE	0.013	0.056	0.38	0.49	-0.057	0.15	0.66	0.86	0.94
fat	IV	FBgn0031950	Herp	34065	23.65	1003.33	0.0011	0.32	0.0066	0.63	-1.4	0.18	TRUE	TRUE	FALSE	FALSE	0.0031	0.021	0.35	0.47	0.35	0.99	1	0.15	0.44
fat	IV	FBgn0052675	Tango5	326232	28.15	769.07	0.032	0.048	0.087	0.26	-0.23	0.32	TRUE	FALSE	FALSE	FALSE	0.00091	0.0084	0.004	0.014	0.32	0.93	1	0.085	0.36
fat	IV	FBgn0016701	Rab4	36992	28.36	892.94	0.0016	0.29	0.0087	0.61	-0.4	0.19	TRUE	FALSE	FALSE	FALSE	0.077	0.19	0.3	0.41	-0.12	0.36	0.91	0.096	0.38
fat	IV	FBgn0030521	CtsB1	32341	31.14	6983.77	0.0037	0.2	0.017	0.53	-0.31	0.32	TRUE	FALSE	FALSE	FALSE	0.0024	0.018	0.12	0.2	0.15	0.82	1	0.12	0.41
fat	IV	FBgn0052649	CG32649	32239	27.94	815.22	0.0077	0.14	0.03	0.45	-0.41	0.29	TRUE	FALSE	FALSE	FALSE	0.016	0.065	0.46	0.57	0.1	0.8	1	0.46	0.71
fat	IV	FBgn0038463	CG3534	42047	31.12	1803.38	0.031	0.051	0.085	0.27	-0.18	0.45	TRUE	FALSE	FALSE	FALSE	0.0036	0.023	0.027	0.064	0.18	0.57	1	0.027	0.26
fat	IV	FBgn0037765	CG9458	41214	25.77	2955.46	0.0027	0.23	0.014	0.56	-0.94	0.33	TRUE	FALSE	FALSE	FALSE	0.93	0.96	0.0036	0.013	-0.9	0.21	0.76	0.16	0.45
fat	IV	FBgn0036258	eIF3l	39386	30.97	3860.13	0.0074	0.15	0.029	0.46	-0.27	0.23	TRUE	FALSE	TRUE	FALSE	0.64	0.78	0.03	0.069	-0.21	0.018	0.28	0.2	0.49
fat	IV	FBgn0011289	TfIIA-L	43284	25.3	1582.44	0.012	0.11	0.042	0.4	-0.41	0.24	TRUE	FALSE	FALSE	FALSE	0.016	0.063	0.33	0.45	0.15	0.84	1	0.42	0.67
fat	IV	FBgn0010225	Gel	46008	32.18	21909.5	0.00039	0.46	0.0029	0.73	-0.25	0.2	TRUE	FALSE	FALSE	FALSE	9.7e-05	0.0017	0.014	0.038	0.16	0.79	1	0.22	0.52
fat	IV	FBgn0086687	Desat1	117369	33.59	99279.7	0.004	0.21	0.018	0.53	-0.29	0.35	TRUE	FALSE	TRUE	FALSE	0.39	0.56	0.054	0.11	-0.18	0.037	0.36	0.19	0.48
fat	IV	FBgn0014000	Hf	44038	26.94	5288.7	0.00099	0.36	0.0059	0.66	-0.77	0.29	TRUE	FALSE	FALSE	FALSE	0.035	0.11	0.48	0.59	-0.14	0.85	1	0.2	0.49
fat	IV	FBgn0001123	Galphas	37805	29.13	379.54	0.016	0.096	0.052	0.37	-0.27	0.39	TRUE	FALSE	FALSE	FALSE	0.087	0.21	0.92	0.94	-0.011	0.29	0.85	0.053	0.31
fat	IV	FBgn0037328	RpL35A	40654	32.69	10294.7	0.0038	0.22	0.017	0.54	-0.36	0.25	TRUE	FALSE	FALSE	FALSE	0.0096	0.045	7.8e-07	1.9e-05	-0.81	0.75	1	0.085	0.36
fat	IV	FBgn0003074	Pgi	35886	34.9	10398.4	0.016	0.099	0.052	0.38	-0.14	0.36	TRUE	FALSE	FALSE	FALSE	4e-06	0.00017	3.6e-06	5.6e-05	0.34	0.96	1	0.097	0.38
fat	IV	FBgn0040827	CG13315	50300	27.85	23657.8	0.018	0.092	0.056	0.37	-0.85	0.53	TRUE	FALSE	FALSE	FALSE	0.22	0.39	0.43	0.54	-0.26	0.7	1	0.015	0.21
fat	IV	FBgn0260742	CG12213	41447	26.71	524.65	0.02	0.083	0.061	0.35	-0.47	0.22	TRUE	FALSE	FALSE	FALSE	0.0013	0.011	0.011	0.03	0.52	0.99	1	0.18	0.48
fat	IV	FBgn0027835	Dp1	37116	33.24	10399.3	0.037	0.05	0.097	0.27	-0.1	0.32	TRUE	FALSE	TRUE	FALSE	0.031	0.1	0.3	0.42	0.049	0.0055	0.17	0.05	0.31
fat	IV	FBgn0003942	RpS27A	34420	34.25	35512.8	0.0011	0.36	0.0063	0.66	-0.3	0.18	TRUE	FALSE	FALSE	FALSE	0.00041	0.0047	0.039	0.084	0.17	0.87	1	0.2	0.5
fat	IV	FBgn0027930	MP1	40541	26.1	3694.89	0.00019	0.56	0.0016	0.79	-1.3	0.16	TRUE	FALSE	FALSE	FALSE	0.55	0.71	0.0012	0.0054	-1	0.39	0.94	0.13	0.42
fat	IV	FBgn0030703	MSBP	32548	31.67	7404.1	0.038	0.052	0.099	0.27	-0.22	0.49	TRUE	FALSE	TRUE	FALSE	0.8	0.88	0.078	0.15	-0.19	0.023	0.3	0.036	0.27
fat	IV	FBgn0000250	cact	34969	27.79	2702.9	0.0037	0.24	0.017	0.56	-0.44	0.21	TRUE	FALSE	FALSE	FALSE	0.12	0.26	0.31	0.43	-0.14	0.43	0.96	0.51	0.74
fat	IV	FBgn0261794	kcc	37800	28.1	1422.56	0.009	0.15	0.033	0.46	-0.44	0.22	TRUE	FALSE	FALSE	FALSE	0.33	0.51	0.00041	0.0022	-0.65	0.27	0.83	0.027	0.26
fat	IV	FBgn0032780	CG13085	35219	28.87	128.7	0.012	0.13	0.041	0.43	-0.77	0.44	TRUE	FALSE	FALSE	FALSE	0.25	0.42	0.28	0.39	-0.31	0.62	1	0.039	0.28
fat	IV	FBgn0011695	EbpIII	49821	33.43	2214.28	0.00021	0.56	0.0018	0.8	-0.59	0.16	TRUE	FALSE	FALSE	FALSE	0.00033	0.004	0.12	0.21	0.21	0.99	1	0.51	0.74
fat	IV	FBgn0010548	Aldh-III	45398	32.95	8643.37	0.00023	0.55	0.0019	0.79	-0.25	0.16	TRUE	FALSE	TRUE	FALSE	0.94	0.96	0.00018	0.0012	-0.26	0.00019	0.089	0.42	0.68
fat	IV	FBgn0019925	Surf4	41864	27.81	1931.17	0.014	0.12	0.047	0.42	-0.47	0.23	TRUE	FALSE	FALSE	FALSE	0.22	0.39	0.36	0.48	-0.16	0.45	0.97	0.057	0.32
fat	IV	FBgn0008635	betaCOP	32820	30	2796.82	0.0019	0.32	0.01	0.64	-0.3	0.22	TRUE	FALSE	FALSE	FALSE	0.046	0.14	0.55	0.66	-0.05	0.23	0.77	0.66	0.84
fat	IV	FBgn0044510	mRpS5	3355089	27.46	943	0.00021	0.57	0.0018	0.8	-0.45	0.2	TRUE	FALSE	TRUE	FALSE	0.54	0.7	0.0014	0.006	-0.36	0.037	0.36	0.72	0.87
fat	IV	FBgn0265274	Inx3	44266	28.8	911.28	0.026	0.081	0.075	0.35	-0.32	0.3	TRUE	FALSE	FALSE	FALSE	0.52	0.68	0.0037	0.013	-0.44	0.13	0.62	0.0016	0.068
fat	IV	FBgn0030926	psh	32832	25.79	1759.07	0.0035	0.26	0.016	0.59	-0.74	0.34	TRUE	FALSE	FALSE	FALSE	0.068	0.17	0.54	0.65	-0.14	0.79	1	0.14	0.43
fat	IV	FBgn0038076	Cyp313a4	41563	25.47	233.01	0.00046	0.49	0.0033	0.75	-2	0.2	TRUE	FALSE	FALSE	FALSE	0.031	0.1	0.35	0.46	-0.45	0.96	1	0.65	0.83
fat	IV	FBgn0031701	TotM	33764	25.76	1077.59	0.028	0.078	0.08	0.34	-1.7	0.71	TRUE	FALSE	FALSE	FALSE	0.011	0.049	0.12	0.21	1.2	0.99	1	0.0043	0.11
fat	IV	FBgn0022160	Gpo1	47611	34.78	9138.99	0.00025	0.56	0.002	0.8	-0.32	0.19	TRUE	FALSE	TRUE	FALSE	0.55	0.71	4e-05	0.00035	-0.37	0.005	0.17	0.54	0.76
fat	IV	FBgn0031220	CG4822	33170	25.61	4264.15	0.013	0.14	0.043	0.45	-1	0.37	TRUE	FALSE	FALSE	FALSE	0.092	0.21	0.8	0.86	-0.091	0.86	1	0.04	0.28
fat	IV	FBgn0052667	ssp7	318146	24.61	3660.72	0.023	0.095	0.068	0.37	-1.5	0.49	TRUE	FALSE	FALSE	FALSE	0.12	0.26	0.84	0.89	-0.12	0.88	1	0.017	0.22
fat	IV	FBgn0033134	Tsp42El	35622	25.44	552.47	0.0052	0.23	0.022	0.55	-0.92	0.37	TRUE	FALSE	FALSE	FALSE	0.35	0.53	0.082	0.15	-0.53	0.55	1	0.34	0.62
fat	IV	FBgn0035947	Srp68	39028	30.67	1767.13	0.0011	0.4	0.0066	0.69	-0.37	0.14	TRUE	FALSE	TRUE	FALSE	0.56	0.72	0.0071	0.022	-0.29	0.034	0.34	0.57	0.79
fat	IV	FBgn0031561	IM33	33592	29.37	17830.2	8.2e-06	0.84	0.00014	0.94	-1.2	0.061	TRUE	TRUE	FALSE	FALSE	7.2e-07	5.5e-05	0.00038	0.0021	0.87	1	1	0.086	0.36
fat	IV	FBgn0032029	CG17292	34152	28.66	3341.66	0.0076	0.2	0.029	0.52	-0.54	0.36	TRUE	FALSE	FALSE	FALSE	0.33	0.51	0.13	0.22	-0.29	0.37	0.92	0.23	0.53
fat	IV	FBgn0262057	Spn77Ba	40234	30.04	1909.93	0.0035	0.28	0.016	0.6	-0.34	0.29	TRUE	FALSE	FALSE	FALSE	0.03	0.1	0.96	0.97	-0.0045	0.47	0.99	0.23	0.53
fat	IV	FBgn0031228	ND-15	33179	30.32	1534.51	0.0081	0.19	0.031	0.52	-0.41	0.27	TRUE	FALSE	FALSE	FALSE	0.0058	0.032	0.16	0.26	0.2	0.91	1	0.075	0.35
fat	IV	FBgn0010348	Arf79F	40506	31.68	2982.62	0.02	0.11	0.061	0.4	-0.28	0.39	TRUE	FALSE	TRUE	FALSE	0.43	0.6	0.17	0.27	-0.15	0.085	0.51	0.053	0.31
fat	IV	FBgn0035501	CG1299	38496	29.09	657.26	0.037	0.069	0.097	0.32	-0.27	0.49	TRUE	FALSE	FALSE	FALSE	0.34	0.52	0.002	0.0077	-0.43	0.15	0.66	0.092	0.37
fat	IV	FBgn0039326	CG10562	43066	29.56	425.51	1e-07	0.97	4.9e-06	0.99	-0.82	0.0073	TRUE	FALSE	FALSE	FALSE	0.0032	0.021	0.0015	0.0061	-0.36	0.81	1	0.43	0.68
fat	IV	FBgn0024957	Irp-1B	41269	35.86	22362.4	0.023	0.1	0.069	0.39	-0.12	0.45	TRUE	FALSE	FALSE	FALSE	3.8e-06	0.00016	2.4e-06	4.2e-05	0.33	0.93	1	0.34	0.62
fat	IV	FBgn0028327	l(1)G0320	326234	32.33	2049.3	0.034	0.076	0.092	0.34	-0.26	0.23	TRUE	FALSE	FALSE	FALSE	0.17	0.33	0.79	0.85	-0.03	0.24	0.79	0.019	0.23
fat	IV	FBgn0032036	CG13384	34160	25.91	778.43	0.012	0.16	0.042	0.47	-0.75	0.19	TRUE	FALSE	FALSE	FALSE	0.46	0.62	0.0012	0.0051	-1	0.45	0.97	0.89	0.95
fat	IV	FBgn0030733	UQCR-14	32586	32.48	3176.62	0.019	0.12	0.059	0.42	-0.33	0.33	TRUE	FALSE	FALSE	FALSE	0.0031	0.021	0.036	0.08	0.29	0.93	1	0.046	0.3
fat	IV	FBgn0036597	CG4962	39793	28.98	0.67	0.00068	0.49	0.0044		-0.57	0.17	TRUE	FALSE	FALSE	FALSE	0.0022	0.016	0.35	0.47	0.13	0.96	1	0.33
fat	IV	FBgn0026061	Mipp1	39841	30.82	990.28	0.00031	0.58	0.0024	0.81	-0.52	0.13	TRUE	FALSE	FALSE	FALSE	0.22	0.4	0.015	0.039	-0.31	0.21	0.76	0.89	0.95
fat	IV	FBgn0034436	CG11961	37221	25.65	922.6	0.00034	0.57	0.0026	0.8	-0.79	0.12	TRUE	TRUE	FALSE	FALSE	0.00013	0.0021	0.024	0.057	0.44	1	1	0.46	0.71
fat	IV	FBgn0033366	Ance-4	35909	24.3	3592.92	0.0074	0.22	0.029	0.55	-0.8	0.38	TRUE	FALSE	FALSE	FALSE	0.018	0.071	0.52	0.63	0.17	0.95	1	0.094	0.38
fat	IV	FBgn0033624	CG12384	36224	31.83	1122	0.026	0.11	0.075	0.39	-0.18	0.32	TRUE	FALSE	FALSE	FALSE	2.9e-05	0.00073	3.7e-05	0.00033	0.4	0.98	1	0.065	0.33
fat	IV	FBgn0037553	CG18249	40964	24.92	1015.65	0.038	0.08	0.098	0.35	-0.6	0.44	TRUE	FALSE	FALSE	FALSE	0.15	0.3	0.91	0.94	-0.032	0.72	1	0.03	0.26
fat	IV	FBgn0037818	CG6465	41274	27.72	321.52	2.5e-05	0.81	0.00032	0.92	-0.89	0.061	TRUE	FALSE	FALSE	FALSE	0.0017	0.013	0.67	0.76	-0.067	0.98	1	0.43	0.68
fat	IV	FBgn0038426	mRpS33	41991	25.36	166.68	0.0029	0.34	0.014	0.65	-1.2	0.19	TRUE	FALSE	FALSE	FALSE	0.099	0.23	0.33	0.45	-0.33	0.84	1	0.51	0.74
fat	IV	FBgn0037265	spartin	40582	26.11	551.16	0.0076	0.23	0.03	0.56	-0.79	0.31	TRUE	FALSE	FALSE	FALSE	0.52	0.69	0.001	0.0046	-1	0.39	0.94	0.097	0.38
fat	IV	FBgn0038319	mRpL9	41859	26.72	308	0.016	0.16	0.051	0.47	-0.38	0.33	TRUE	FALSE	TRUE	FALSE	0.82	0.9	0.0079	0.024	-0.42	0.078	0.5	0.73	0.87
fat	IV	FBgn0035770	pst	38818	30.04	21820.7	0.0014	0.44	0.0078	0.71	-0.46	0.21	TRUE	TRUE	FALSE	FALSE	3e-05	0.00075	0.00072	0.0035	0.5	1	1	0.28	0.57
fat	IV	FBgn0044030	mRpS14	117414	25.82	340.18	0.003	0.34	0.014	0.65	-0.55	0.17	TRUE	FALSE	FALSE	FALSE	0.11	0.24	0.3	0.42	-0.17	0.57	1	0.32	0.61
fat	IV	FBgn0038449	CG17562	42021	29.05	3801.97	0.0084	0.23	0.032	0.56	-0.38	0.29	TRUE	FALSE	FALSE	FALSE	0.24	0.41	0.00019	0.0012	-0.61	0.26	0.83	0.12	0.42
fat	IV	FBgn0020496	CtBP	41602	30.5	1680.91	0.0011	0.48	0.0065	0.74	-0.38	0.094	TRUE	FALSE	TRUE	FALSE	0.73	0.84	0.00038	0.0021	-0.43	0.024	0.31	0.56	0.77
fat	IV	FBgn0052495	Gss2	318053	28.19	4499.88	0.012	0.2	0.041	0.52	-0.6	0.3	TRUE	FALSE	FALSE	FALSE	0.075	0.19	3.6e-05	0.00033	-1.2	0.77	1	0.14	0.44
fat	IV	FBgn0027598	cindr	43654	28.11	1758.28	0.0073	0.25	0.029	0.58	-0.3	0.19	TRUE	FALSE	FALSE	FALSE	0.00043	0.0049	0.0065	0.02	0.3	0.96	1	0.011	0.19
fat	IV	FBgn0004855	RpII15	41741	24.98	155.65	0.0022	0.4	0.011	0.69	-1.5	0.19	TRUE	FALSE	FALSE	FALSE	0.4	0.57	0.00015	0.00099	-2	0.62	1	0.91	0.96
fat	IV	FBgn0041630	Hexo1	38528	25.94	922.15	0.028	0.12	0.079	0.42	-0.51	0.35	TRUE	FALSE	FALSE	FALSE	0.0018	0.014	0.012	0.033	0.6	0.99	1	0.87	0.94
fat	IV	FBgn0002622	RpS3	42761	34.36	32545.2	0.0059	0.29	0.024	0.61	-0.16	0.24	TRUE	FALSE	TRUE	FALSE	0.031	0.1	5e-06	7.1e-05	-0.32	0.012	0.23	0.16	0.45
fat	IV	FBgn0003206	Ras64B	38494	30.11	320.82	0.03	0.12	0.083	0.41	-0.22	0.35	TRUE	FALSE	TRUE	FALSE	0.62	0.76	0.12	0.2	-0.16	0.028	0.32	0.39	0.65
fat	IV	FBgn0039562	Gp93	43354	32.89	5189.1	0.017	0.17	0.055	0.49	-0.18	0.26	TRUE	FALSE	FALSE	FALSE	6.3e-05	0.0012	0.00017	0.0011	0.33	0.95	1	0.96	0.98
fat	IV	FBgn0010611	Hmgs	44154	31.02	3895.49	0.017	0.18	0.054	0.5	-0.24	0.3	TRUE	FALSE	FALSE	FALSE	0.0022	0.016	0.026	0.062	0.22	0.81	1	0.2	0.49
fat	IV	FBgn0032429	CG5446	34655	26.5	192.89	0.02	0.16	0.062	0.48	-0.49	0.27	TRUE	FALSE	FALSE	FALSE	0.27	0.45	0.35	0.47	-0.18	0.45	0.97	0.14	0.44
fat	IV	FBgn0033926	Arc1	36595	27.39	27056	3.2e-06	0.93	6.4e-05	0.97	-1	0.032	TRUE	FALSE	FALSE	FALSE	0.065	0.17	0.0011	0.0049	-0.61	0.66	1	0.27	0.56
fat	IV	FBgn0039358	CG5028	43102	32.53	2217.75	0.018	0.18	0.056	0.5	-0.28	0.22	TRUE	FALSE	TRUE	FALSE	0.43	0.6	0.16	0.25	-0.16	0.083	0.51	0.0065	0.14
fat	IV	FBgn0032538	CG16885	34811	33.05	2.36	0.00078	0.55	0.0049		-0.36	0.21	TRUE	FALSE	TRUE	FALSE	0.32	0.5	0.018	0.045	-0.23	0.056	0.43	0.75
fat	IV	FBgn0029506	Tsp42Ee	35614	28.77	2969.62	0.004	0.35	0.018	0.66	-0.36	0.18	TRUE	FALSE	FALSE	FALSE	0.26	0.44	0.11	0.19	-0.19	0.16	0.66	0.15	0.44
fat	IV	FBgn0004779	Ccp84Ae	40821	31.5	0.16	0.00091	0.54	0.0056		-0.37	0.08	TRUE	FALSE	TRUE	FALSE	0.69	0.81	0.0032	0.012	-0.32	0.022	0.29	0.93
fat	IV	FBgn0000083	AnxB9	42492	32.96	3458.21	0.0095	0.25	0.035	0.58	-0.19	0.25	TRUE	FALSE	FALSE	FALSE	0.0018	0.014	0.034	0.076	0.15	0.5	1	0.2	0.49
fat	IV	FBgn0033844	bbc	36496	27.97	2981.54	0.0014	0.49	0.0081	0.75	-0.68	0.13	TRUE	FALSE	FALSE	FALSE	0.94	0.97	0.0012	0.0051	-0.7	0.11	0.58	0.42	0.67
fat	IV	FBgn0032785	CG10026	35226	23.26	163.21	0.032	0.12	0.087	0.42	-1.4	0.39	TRUE	FALSE	FALSE	FALSE	0.31	0.49	0.4	0.52	-0.51	0.73	1	0.0034	0.1
fat	IV	FBgn0026872	CG14777	31099	25.26	163.33	0.00013	0.75	0.0012	0.89	-0.96	0.11	TRUE	FALSE	FALSE	FALSE	0.01	0.047	0.42	0.54	-0.16	0.94	1	0.26	0.56
fat	IV	FBgn0038674	CG14285	42281	25.16	20.72	0.0046	0.36	0.02	0.66	-0.64	0.35	TRUE	FALSE	FALSE	FALSE	0.94	0.97	0.0059	0.019	-0.62	0.13	0.63	0.86	0.94
fat	IV	FBgn0037491	CG1227	40872	25.06	260.92	0.0044	0.36	0.02	0.66	-1.1	0.15	TRUE	FALSE	FALSE	FALSE	0.048	0.14	7.2e-06	9.6e-05	-2.1	0.91	1	0.42	0.67
fat	IV	FBgn0037182	ArfGAP3	40487	28.08	1303.75	0.014	0.23	0.046	0.55	-0.36	0.15	TRUE	TRUE	FALSE	FALSE	0.00012	0.002	0.00053	0.0027	0.56	1	1	0.27	0.56
fat	IV	FBgn0019952	Orct	42891	24.46	1630.11	0.0087	0.28	0.032	0.6	-1.2	0.35	TRUE	FALSE	FALSE	FALSE	0.055	0.15	0.96	0.97	-0.019	0.92	1	0.19	0.48
fat	IV	FBgn0027066	Eb1	35584	30.23	1062.93	0.0025	0.45	0.012	0.72	-0.29	0.2	TRUE	FALSE	TRUE	FALSE	0.14	0.28	2.1e-05	0.00021	-0.46	0.088	0.52	0.53	0.75
fat	IV	FBgn0003748	Treh	45368	30.18	4484.52	0.00011	0.78	0.0011	0.9	-0.46	0.06	TRUE	FALSE	FALSE	FALSE	0.088	0.21	0.028	0.065	-0.22	0.22	0.76	0.39	0.66
fat	IV	FBgn0004777	Ccp84Ag	40819	31.49	2.02	6.9e-05	0.81	0.00071		-0.49	0.083	TRUE	FALSE	FALSE	FALSE	0.0049	0.028	0.54	0.65	-0.06	0.75	1	0.19
fat	IV	FBgn0038388	CG4287	41939	24.93	1451.76	0.0038	0.4	0.017	0.69	-0.47	0.18	TRUE	FALSE	FALSE	FALSE	0.46	0.63	0.036	0.079	-0.32	0.18	0.7	0.31	0.59
fat	IV	FBgn0036488	CG6878	39656	26.82	225.33	3.3e-05	0.86	0.00041	0.94	-1.1	0.029	TRUE	TRUE	FALSE	FALSE	0.00094	0.0086	0.93	0.95	0.019	0.99	1	0.96	0.98
fat	IV	FBgn0039639	CG14512	43443	24.76	24.75	0.002	0.5	0.011	0.75	-1.1	0.28	TRUE	FALSE	FALSE	FALSE	0.014	0.058	0.81	0.86	0.074	0.96	1	0.67	0.84
fat	IV	FBgn0037135	CG7414	40431	29.38	13977.5	0.039	0.13	0.1	0.44	-0.25	0.34	TRUE	FALSE	FALSE	FALSE	0.0054	0.03	0.037	0.082	0.25	0.84	1	0.048	0.3
fat	IV	FBgn0032243	Klp31E	34422	25.12	253.06	0.0064	0.35	0.026	0.66	-1	0.27	TRUE	FALSE	FALSE	FALSE	0.59	0.74	0.032	0.073	-0.78	0.43	0.96	0.23	0.53
fat	IV	FBgn0019982	Gs1l	33653	31.94	1671.29	0.019	0.21	0.059	0.53	-0.21	0.31	TRUE	TRUE	FALSE	FALSE	1.1e-05	0.00036	1.3e-05	0.00015	0.49	1	1	0.28	0.57
fat	IV	FBgn0039238	CG7016	42968	25.12	376.41	0.017	0.23	0.055	0.55	-1.9	0.3	TRUE	FALSE	FALSE	FALSE	0.97	0.98	0.015	0.041	-2	0.39	0.93	0.047	0.3
fat	IV	FBgn0041789	Pax	35215	31.61	1571	0.0011	0.58	0.0064	0.81	-0.31	0.12	TRUE	FALSE	TRUE	FALSE	0.94	0.97	0.0014	0.0059	-0.3	0.0045	0.17	0.41	0.67
fat	IV	FBgn0264978	Slh	33434	29.35	1498.44	0.031	0.16	0.085	0.48	-0.21	0.31	TRUE	FALSE	TRUE	FALSE	0.24	0.42	0.00078	0.0037	-0.36	0.076	0.49	0.27	0.56
fat	IV	FBgn0038088	CG10126	41579	27.87	140.94	0.011	0.29	0.039	0.6	-0.34	0.28	TRUE	FALSE	FALSE	FALSE	0.0011	0.0095	0.015	0.04	0.32	0.96	1	0.26	0.56
fat	IV	FBgn0031774	CG9147	33855	26.04	265.58	0.0096	0.3	0.035	0.62	-0.64	0.19	TRUE	FALSE	FALSE	FALSE	0.82	0.89	0.019	0.049	-0.57	0.2	0.74	0.44	0.69
fat	IV	FBgn0263006	SERCA	49297	35.69	7755.48	0.01	0.3	0.037	0.62	-0.16	0.19	TRUE	FALSE	TRUE	FALSE	0.17	0.33	0.00013	0.00091	-0.26	0.0037	0.16	0.29	0.58
fat	IV	FBgn0263740	eIF2gamma	41843	32.61	3183.34	0.0017	0.54	0.0091	0.79	-0.21	0.082	TRUE	FALSE	FALSE	FALSE	0.00032	0.0039	1.1e-08	6.2e-07	-0.58	0.61	1	0.78	0.89
fat	IV	FBgn0052441	CG32441	40396	28.04	1495.06	0.024	0.2	0.071	0.52	-0.25	0.31	TRUE	FALSE	FALSE	FALSE	0.24	0.41	0.47	0.58	-0.077	0.14	0.63	0.4	0.66
fat	IV	FBgn0028940	Cyp28a5	34817	27.58	851.29	0.016	0.25	0.052	0.58	-0.27	0.33	TRUE	FALSE	FALSE	FALSE	0.0025	0.018	0.033	0.074	0.23	0.87	1	0.17	0.46
fat	IV	FBgn0034951	CG3860	37825	26.52	760.7	0.0003	0.73	0.0023	0.89	-0.91	0.059	TRUE	TRUE	FALSE	FALSE	8.7e-05	0.0016	0.016	0.041	0.54	1	1	0.27	0.56
fat	IV	FBgn0035401	Alg2	38374	28.96	368.99	0.00023	0.76	0.0019	0.9	-0.51	0.058	TRUE	FALSE	TRUE	FALSE	0.53	0.69	0.0016	0.0067	-0.41	0.072	0.48	0.57	0.78
fat	IV	FBgn0023549	Mct1	31198	27.26	2769.09	0.024	0.21	0.07	0.53	-0.54	0.32	TRUE	FALSE	FALSE	FALSE	0.0049	0.028	0.053	0.11	0.45	0.98	1	0.39	0.65
fat	IV	FBgn0034420	CG10737	37202	29.48	2769.49	0.0012	0.6	0.0069	0.81	-0.39	0.12	TRUE	FALSE	TRUE	FALSE	0.37	0.55	0.02	0.049	-0.26	0.076	0.49	0.55	0.77
fat	IV	FBgn0039890	CG2316	43772	25.64	1541.99	0.0014	0.58	0.0081	0.8	-0.6	0.15	TRUE	FALSE	FALSE	FALSE	0.57	0.72	0.00024	0.0014	-0.73	0.18	0.7	0.21	0.51
fat	IV	FBgn0033981	Cyp6a21	36665	28.17	617.31	0.0066	0.38	0.026	0.67	-0.42	0.22	TRUE	FALSE	FALSE	FALSE	0.19	0.35	0.27	0.38	-0.16	0.35	0.9	0.49	0.73
fat	IV	FBgn0038603	PKD	42203	27.95	2965.57	0.0034	0.47	0.016	0.73	-0.33	0.18	TRUE	FALSE	FALSE	FALSE	0.00074	0.0074	0.029	0.067	0.23	0.93	1	0.096	0.38
fat	IV	FBgn0087002	apolpp	43827	37.61	319192	0.00022	0.77	0.0018	0.9	-0.38	0.075	TRUE	TRUE	FALSE	FALSE	4.4e-09	2.1e-06	6.3e-09	4.3e-07	0.86	1	1	0.033	0.27
fat	IV	FBgn0010612	ATPsynG	46069	34.09	5155.11	0.0011	0.62	0.0063	0.82	-0.39	0.12	TRUE	FALSE	FALSE	FALSE	0.0012	0.01	0.14	0.23	0.15	0.92	1	0.15	0.44
fat	IV	FBgn0017545	RpS3A	43768	34.48	46265.2	0.0038	0.46	0.018	0.73	-0.21	0.14	TRUE	FALSE	TRUE	FALSE	0.91	0.95	0.0054	0.018	-0.2	0.00091	0.13	0.17	0.47
fat	IV	FBgn0033191	CG1598	35690	29.46	891.73	0.0084	0.35	0.031	0.66	-0.36	0.17	TRUE	FALSE	FALSE	FALSE	0.4	0.58	0.00058	0.0029	-0.51	0.14	0.64	0.65	0.83
fat	IV	FBgn0031663	CG8891	33718	29.67	342.38	0.0085	0.36	0.032	0.66	-0.29	0.18	TRUE	FALSE	TRUE	FALSE	0.68	0.81	0.0024	0.009	-0.35	0.03	0.33	0.74	0.88
fat	IV	FBgn0037215	beta-Man	40524	27.89	2149.63	0.00065	0.68	0.0043	0.86	-0.58	0.077	TRUE	FALSE	FALSE	FALSE	0.37	0.54	0.011	0.032	-0.39	0.22	0.76	0.34	0.62
fat	IV	FBgn0032773	fon	35211	32.47	13593.7	0.0065	0.4	0.026	0.69	-0.32	0.23	TRUE	FALSE	FALSE	FALSE	0.0009	0.0083	0.02	0.05	0.26	0.94	1	0.11	0.39
fat	IV	FBgn0034727	mRpS29	37563	28.26	504.28	0.0016	0.58	0.009	0.81	-0.49	0.095	TRUE	FALSE	FALSE	FALSE	0.47	0.64	0.016	0.041	-0.35	0.15	0.66	0.26	0.55
fat	IV	FBgn0038808	Srp14	42436	28.61	353.17	0.0035	0.49	0.017	0.75	-0.37	0.12	TRUE	FALSE	FALSE	FALSE	0.036	0.11	0.89	0.92	-0.016	0.53	1	0.83	0.92
fat	IV	FBgn0015577	alpha-Est9	40897	26.4	1692.82	0.0045	0.45	0.02	0.72	-0.31	0.22	TRUE	FALSE	TRUE	FALSE	0.6	0.74	0.023	0.056	-0.24	0.032	0.34	0.33	0.61
fat	IV	FBgn0040575	CG15922	50048	25.21	109.29	0.011	0.33	0.039	0.64	-0.74	0.19	TRUE	FALSE	FALSE	FALSE	0.0028	0.02	0.054	0.11	0.54	0.99	1	0.96	0.98
fat	IV	FBgn0040793	CG7630	50266	32.04	3415.5	0.026	0.22	0.074	0.54	-0.74	0.27	TRUE	FALSE	FALSE	FALSE	0.0047	0.028	0.047	0.099	0.64	0.99	1	0.09	0.37
fat	IV	FBgn0260860	Bet5	43590	27.81	73.95	0.039	0.17	0.1	0.49	-0.39	0.39	TRUE	FALSE	FALSE	FALSE	0.28	0.46	0.0013	0.0057	-0.66	0.39	0.94	0.39	0.65
fat	IV	FBgn0034045	CG8249	36742	26.74	427.08	0.0024	0.54	0.012	0.78	-0.89	0.15	TRUE	FALSE	FALSE	FALSE	0.88	0.93	0.0039	0.013	-0.84	0.22	0.76	0.046	0.3
fat	IV	FBgn0035089	Phk-3	37997	27.26	165	0.00025	0.78	0.002	0.91	-1	0.08	TRUE	FALSE	FALSE	FALSE	0.0015	0.012	0.48	0.59	0.16	0.99	1	0.069	0.34
fat	IV	FBgn0035189	CG9119	38124	31.29	889.05	0.026	0.22	0.075	0.55	-0.18	0.34	TRUE	FALSE	FALSE	FALSE	0.0014	0.012	0.0094	0.028	0.22	0.73	1	0.18	0.47
fat	IV	FBgn0029002	miple2	44787	23.94	90.97	0.0014	0.62	0.0079	0.82	-0.85	0.15	TRUE	TRUE	FALSE	FALSE	0.0004	0.0046	0.029	0.067	0.53	1	1	0.47	0.71
fat	IV	FBgn0035452	CG10359	38434	29.9	32.39	0.016	0.29	0.052	0.61	-0.31	0.36	TRUE	FALSE	FALSE	FALSE	0.2	0.36	0.45	0.56	-0.089	0.23	0.77	0.068	0.33
fat	IV	FBgn0031771	ND-51	33852	32.69	6517.28	0.023	0.25	0.068	0.58	-0.23	0.26	TRUE	FALSE	TRUE	FALSE	0.49	0.65	0.15	0.25	-0.14	0.035	0.35	0.26	0.55
fat	IV	FBgn0250788	beta-Spec	32746	34.65	9384.26	0.0003	0.78	0.0023	0.91	-0.22	0.058	TRUE	FALSE	TRUE	FALSE	0.17	0.32	4.3e-06	6.3e-05	-0.32	0.0013	0.13	0.39	0.66
fat	IV	FBgn0031936	CG13794	34048	24.1	1168.21	0.00088	0.68	0.0054	0.86	-2.8	0.11	TRUE	FALSE	FALSE	FALSE	0.73	0.84	0.00029	0.0017	-3.1	0.5	1	0.11	0.4
fat	IV	FBgn0035372	CG12093	38343	26.58	758.24	0.0057	0.45	0.024	0.72	-2.8	0.16	TRUE	FALSE	FALSE	FALSE	0.75	0.85	0.015	0.04	-2.4	0.52	1	0.47	0.72
fat	IV	FBgn0030872	Ucp4A	32764	27.11	533.05	5.1e-05	0.89	0.00056	0.96	-0.92	0.028	TRUE	FALSE	FALSE	FALSE	0.0085	0.042	0.28	0.39	-0.19	0.93	1	0.69	0.85
fat	IV	FBgn0263120	Acsl	46068	34.64	40791.2	0.034	0.21	0.091	0.53	-0.13	0.32	TRUE	FALSE	TRUE	FALSE	0.21	0.38	0.64	0.73	-0.027	0.0043	0.17	0.025	0.25
fat	IV	FBgn0014026	RpL7A	31588	34.22	44433.5	0.035	0.21	0.092	0.53	-0.26	0.3	TRUE	FALSE	FALSE	FALSE	0.1	0.23	0.00017	0.0011	-0.53	0.34	0.9	0.15	0.44
fat	IV	FBgn0038925	Cchl	42590	25.44	1011.5	0.018	0.3	0.057	0.62	-1.9	0.19	TRUE	FALSE	FALSE	FALSE	0.16	0.31	0.62	0.71	-0.37	0.87	1	0.44	0.69
fat	IV	FBgn0028983	Spn55B	49803	29.42	323.27	0.0022	0.59	0.011	0.81	-0.58	0.15	TRUE	FALSE	FALSE	FALSE	0.0082	0.041	0.54	0.64	0.1	0.92	1	0.83	0.92
fat	IV	FBgn0053217	CG33217	2768951	27.29	222.86	0.002	0.6	0.011	0.82	-1.7	0.18	TRUE	FALSE	FALSE	FALSE	0.46	0.63	0.02	0.05	-1.2	0.59	1	0.61	0.8
fat	IV	FBgn0265003	koi	35594	29.71	749.12	0.00016	0.85	0.0014	0.94	-0.48	0.032	TRUE	FALSE	FALSE	FALSE	0.059	0.16	0.071	0.14	-0.19	0.35	0.91	0.28	0.57
fat	IV	FBgn0033460	Sec24AB	36025	27.8	933.3	0.0056	0.48	0.023	0.74	-0.33	0.079	TRUE	FALSE	TRUE	FALSE	0.46	0.63	0.052	0.11	-0.22	0.067	0.47	0.29	0.58
fat	IV	FBgn0003279	RpL4	43349	35.34	30745.4	0.013	0.36	0.044	0.66	-0.17	0.22	TRUE	FALSE	TRUE	FALSE	0.052	0.15	2.3e-05	0.00022	-0.35	0.045	0.39	0.15	0.44
fat	IV	FBgn0033972	Ciao1	36655	28.78	1269.3	0.036	0.22	0.095	0.55	-0.18	0.27	TRUE	FALSE	FALSE	FALSE	0.048	0.14	0.47	0.58	0.059	0.19	0.72	0.36	0.63
fat	IV	FBgn0035039	Adck	37938	26.33	771.47	0.00015	0.85	0.0014	0.94	-0.65	0.033	TRUE	FALSE	FALSE	FALSE	0.04	0.12	3.3e-07	9.2e-06	-1.1	0.67	1	0.63	0.82
fat	IV	FBgn0027572	CG5009	37028	30.87	3912.81	0.018	0.32	0.057	0.64	-0.22	0.28	TRUE	FALSE	TRUE	FALSE	0.57	0.72	0.091	0.17	-0.15	0.018	0.28	0.25	0.54
fat	IV	FBgn0037018	CG4042	40291	25.87	305.67	0.00073	0.74	0.0047	0.89	-0.63	0.063	TRUE	FALSE	FALSE	FALSE	0.17	0.33	1.1e-05	0.00013	-0.94	0.44	0.97	0.63	0.82
fat	IV	FBgn0023213	eIF4G1	43839	32.39	4241.6	0.017	0.34	0.055	0.65	-0.15	0.26	TRUE	FALSE	TRUE	FALSE	0.24	0.41	0.0004	0.0022	-0.25	0.0036	0.16	0.11	0.39
fat	IV	FBgn0005674	GluProRS	42834	32.18	2761.72	0.032	0.25	0.088	0.58	-0.15	0.14	TRUE	FALSE	TRUE	FALSE	0.79	0.88	0.015	0.039	-0.18	0.0019	0.13	0.25	0.54
fat	IV	FBgn0039854	CG1635	43720	30.12	474.95	0.018	0.34	0.055	0.65	-0.19	0.16	TRUE	FALSE	TRUE	FALSE	0.28	0.46	0.31	0.42	-0.075	0.017	0.27	0.45	0.7
fat	IV	FBgn0037094	CG7611	40386	29.3	4915.39	0.00015	0.86	0.0014	0.94	-0.59	0.034	TRUE	FALSE	FALSE	FALSE	0.13	0.27	0.021	0.051	-0.31	0.36	0.91	0.28	0.57
fat	IV	FBgn0052230	ND-MLRQ	317928	32.61	2672.07	0.0047	0.54	0.02	0.78	-0.19	0.15	TRUE	FALSE	TRUE	FALSE	0.59	0.74	0.024	0.058	-0.15	0.0013	0.13	0.22	0.52
fat	IV	FBgn0032388	CG6686	34608	23.57	819.52	0.0088	0.45	0.033	0.72	-1.3	0.12	TRUE	FALSE	FALSE	FALSE	0.82	0.9	0.017	0.044	-1.1	0.37	0.92	0.13	0.42
fat	IV	FBgn0039113	CG10217	42809	27.2	1301.27	0.035	0.25	0.093	0.58	-0.32	0.18	TRUE	FALSE	FALSE	FALSE	0.46	0.63	0.0036	0.013	-0.46	0.17	0.69	0.5	0.74
fat	IV	FBgn0004646	ogre	45382	27.78	697.51	0.028	0.3	0.078	0.62	-0.62	0.19	TRUE	FALSE	FALSE	FALSE	0.4	0.57	0.002	0.0079	-0.94	0.47	0.99	0.0051	0.13
fat	IV	FBgn0031635	tank	33684	25.23	1340.11	0.0047	0.56	0.02	0.8	-1.7	0.14	TRUE	FALSE	FALSE	FALSE	0.1	0.23	0.44	0.55	-0.42	0.89	1	0.73	0.87
fat	IV	FBgn0012051	CalpA	37232	31.04	1598.21	0.038	0.26	0.098	0.58	-0.15	0.24	TRUE	FALSE	FALSE	FALSE	0.0057	0.032	3.2e-06	5.2e-05	-0.45	0.34	0.9	0.19	0.48
fat	IV	FBgn0034215	Mtap	36955	32.41	3086.13	0.016	0.4	0.051	0.69	-0.23	0.22	TRUE	FALSE	FALSE	FALSE	0.12	0.26	0.73	0.81	-0.03	0.12	0.61	0.27	0.56
fat	IV	FBgn0038924	CG6028	42589	33.13	1930.12	0.02	0.37	0.061	0.67	-0.17	0.19	TRUE	FALSE	FALSE	FALSE	6.6e-05	0.0013	0.00016	0.0011	0.32	0.93	1	0.54	0.76
fat	IV	FBgn0031418	CG3609	33421	33.67	803.5	0.023	0.34	0.069	0.65	-0.23	0.25	TRUE	FALSE	FALSE	FALSE	0.02	0.076	1e-05	0.00012	-0.57	0.49	1	0.073	0.34
fat	IV	FBgn0030719	eIF5	32566	30.55	2015.49	0.036	0.28	0.094	0.6	-0.21	0.33	TRUE	FALSE	TRUE	FALSE	0.54	0.7	0.18	0.28	-0.13	0.034	0.35	0.38	0.65
fat	IV	FBgn0261602	RpL8	44251	33.58	41486.9	0.025	0.34	0.071	0.65	-0.2	0.23	TRUE	FALSE	TRUE	FALSE	0.15	0.3	0.00023	0.0014	-0.38	0.09	0.53	0.17	0.46
fat	IV	FBgn0028697	RpL15	3354918	32.55	34145.4	0.01	0.48	0.036	0.74	-0.31	0.16	TRUE	FALSE	FALSE	FALSE	0.13	0.27	0.53	0.64	-0.07	0.27	0.83	0.11	0.39
fat	IV	FBgn0030976	CG7378	32888	26.86	271.85	0.0011	0.75	0.0066	0.89	-0.55	0.085	TRUE	FALSE	FALSE	FALSE	0.49	0.65	0.00013	0.00088	-0.69	0.17	0.69	0.83	0.92
fat	IV	FBgn0052016	4E-T	43836	25.74	495.12	0.038	0.28	0.098	0.6	-0.82	0.3	TRUE	FALSE	FALSE	FALSE	0.42	0.59	0.29	0.41	-0.4	0.56	1	0.16	0.45
fat	IV	FBgn0051357	CG31357	326135	26.63	512.92	0.0048	0.59	0.021	0.81	-0.41	0.078	TRUE	FALSE	FALSE	FALSE	0.041	0.13	0.92	0.94	-0.014	0.63	1	0.37	0.64
fat	IV	FBgn0032378	CycY	34593	24.06	354.07	0.032	0.31	0.088	0.62	-1.2	0.19	TRUE	FALSE	FALSE	FALSE	0.029	0.099	0.31	0.43	0.54	0.96	1	0.26	0.56
fat	IV	FBgn0040350	CG3690	31047	24.11	564.22	0.0048	0.59	0.021	0.81	-0.98	0.18	TRUE	FALSE	FALSE	FALSE	0.25	0.42	0.14	0.23	-0.47	0.65	1	0.79	0.9
fat	IV	FBgn0042627	FASN2	117361	34.69	57882.4	0.00034	0.86	0.0026	0.94	-0.29	0.057	TRUE	FALSE	TRUE	FALSE	0.06	0.16	1.1e-06	2.3e-05	-0.48	0.059	0.45	0.82	0.92
fat	IV	FBgn0035553	CG13722	38555	29.11	0.79	0.00085	0.79	0.0053		-0.45	0.058	TRUE	FALSE	FALSE	FALSE	0.23	0.4	0.037	0.082	-0.25	0.19	0.73	0.91
fat	IV	FBgn0038810	Srp72	42439	30.98	978.09	0.011	0.48	0.04	0.74	-0.19	0.12	TRUE	FALSE	FALSE	FALSE	0.011	0.05	0.25	0.37	0.08	0.24	0.79	0.77	0.89
fat	IV	FBgn0039909	ND-49	43798	32.46	3938.79	0.0019	0.71	0.01	0.88	-0.27	0.07	TRUE	FALSE	FALSE	FALSE	0.00082	0.0078	0.055	0.11	0.15	0.77	1	0.38	0.65
fat	IV	FBgn0024734	PRL-1	34952	29.93	965.41	0.0052	0.59	0.022	0.81	-0.38	0.13	TRUE	FALSE	TRUE	FALSE	0.73	0.84	0.0018	0.0072	-0.44	0.056	0.43	0.15	0.44
fat	IV	FBgn0030403	CG1824	32208	28.27	1204.42	0.0074	0.55	0.029	0.79	-0.33	0.12	TRUE	FALSE	FALSE	FALSE	0.17	0.33	0.33	0.44	-0.11	0.23	0.77	0.72	0.87
fat	IV	FBgn0032721	CG10602	35146	32.35	1260.69	0.019	0.41	0.059	0.69	-0.25	0.14	TRUE	FALSE	TRUE	FALSE	0.47	0.64	0.002	0.0078	-0.35	0.05	0.41	0.73	0.87
fat	IV	FBgn0003557	Su(dx)	33379	26.13	1921.04	0.00096	0.79	0.0058	0.91	-1.4	0.043	TRUE	FALSE	FALSE	FALSE	0.013	0.056	0.96	0.97	-0.018	0.97	1	0.92	0.96
fat	IV	FBgn0040377	Vha36-3	31235	26.43	111.55	0.021	0.41	0.062	0.69	-0.43	0.27	TRUE	FALSE	FALSE	FALSE	0.04	0.12	2.4e-05	0.00023	-0.95	0.78	1	0.51	0.74
fat	IV	FBgn0034058	Pex11	36758	26.26	901.73	0.029	0.35	0.081	0.66	-0.27	0.18	TRUE	FALSE	TRUE	FALSE	0.77	0.87	0.012	0.034	-0.31	0.041	0.37	0.82	0.92
fat	IV	FBgn0039555	mRpS22	43345	29.03	807.13	0.02	0.42	0.062	0.7	-0.2	0.15	TRUE	FALSE	FALSE	FALSE	0.057	0.16	0.75	0.82	0.026	0.16	0.68	0.78	0.9
fat	IV	FBgn0025578	Lcp9	37963	27.3	0.53	0.029	0.36	0.08		-1.4	0.19	TRUE	FALSE	FALSE	FALSE	0.75	0.85	0.07	0.14	-1.1	0.46	0.98	0.57
fat	IV	FBgn0259238	CG42336	36205	26.47	305.73	0.015	0.48	0.05	0.74	-1.5	0.16	TRUE	FALSE	FALSE	FALSE	0.055	0.15	0.82	0.88	0.13	0.94	1	0.026	0.26
fat	IV	FBgn0003360	sesB	32007	36.28	0.09	0.032	0.37	0.086		-0.17	0.11	TRUE	FALSE	TRUE	FALSE	0.099	0.22	0.9	0.93	0.0096	0.073	0.49	0.61
fat	IV	FBgn0000319	Chc	32537	33.99	12778	0.014	0.5	0.047	0.75	-0.12	0.095	TRUE	FALSE	TRUE	FALSE	0.77	0.86	0.0057	0.018	-0.14	3.5e-05	0.089	0.087	0.37
fat	IV	FBgn0040319	Gclc	53581	29	2462.95	0.00024	0.91	0.0019	0.96	-0.39	0.021	TRUE	TRUE	FALSE	FALSE	6.2e-06	0.00024	0.00038	0.0021	0.37	1	1	0.3	0.58
fat	IV	FBgn0030745	CG4239	32606	27.27	287.36	0.0079	0.59	0.03	0.81	-0.51	0.1	TRUE	FALSE	FALSE	FALSE	0.61	0.75	0.037	0.081	-0.38	0.19	0.72	0.63	0.82
fat	IV	FBgn0263198	Acn	35173	27.85	702.67	0.0057	0.64	0.024	0.84	-0.42	0.1	TRUE	FALSE	FALSE	FALSE	0.012	0.052	0.42	0.54	0.11	0.84	1	0.93	0.97
fat	IV	FBgn0038879	CG17298	42529	29.15	0.16	0.0089	0.58	0.033		-0.44	0.072	TRUE	FALSE	FALSE	FALSE	0.79	0.88	0.02	0.049	-0.39	0.1	0.56	0.39
fat	IV	FBgn0052174	CG32174	261607	24.47	3.29	0.019	0.46	0.059		-0.63	0.29	TRUE	FALSE	FALSE	FALSE	0.028	0.096	0.43	0.54	0.2	0.91	1	0.14
fat	IV	FBgn0034276	Sardh	37026	23.83	44.56	0.0049	0.66	0.021	0.85	-1	0.16	TRUE	FALSE	FALSE	FALSE	0.25	0.42	0.14	0.24	-0.49	0.67	1	0.45	0.7
fat	IV	FBgn0023441	fus	44095	27.94	3613.97	0.019	0.46	0.06	0.73	-0.4	0.15	TRUE	FALSE	FALSE	FALSE	0.31	0.49	0.29	0.41	-0.17	0.31	0.87	0.19	0.49
fat	IV	FBgn0029706	CG3626	31377	28.28	1094.16	0.0084	0.6	0.032	0.81	-0.43	0.059	TRUE	FALSE	FALSE	FALSE	0.028	0.098	0.68	0.77	0.06	0.76	1	0.49	0.72
fat	IV	FBgn0039959	CG17514	3355040	31.73	4544.17	0.0049	0.67	0.021	0.86	-0.21	0.092	TRUE	FALSE	FALSE	FALSE	0.027	0.093	3.5e-06	5.4e-05	-0.43	0.11	0.57	0.21	0.5
fat	IV	FBgn0040010	CG17493		24.22	312.69	0.0035	0.71	0.016	0.88	-2.3	0.13	TRUE	FALSE	FALSE	FALSE	0.059	0.16	0.61	0.7	-0.36	0.94	1	0.84	0.93
fat	IV	FBgn0038072	CG6225	41559	28.91	203.76	0.017	0.51	0.054	0.76	-0.5	0.21	TRUE	FALSE	FALSE	FALSE	0.84	0.9	0.03	0.069	-0.45	0.15	0.66	0.5	0.73
fat	IV	FBgn0020381	Dredd	31011	25.03	589.56	0.0019	0.8	0.0099	0.91	-0.98	0.065	TRUE	FALSE	FALSE	FALSE	0.89	0.93	0.0012	0.0053	-1	0.23	0.78	0.64	0.82
fat	IV	FBgn0015569	alpha-Est10	40896	26.65	632.01	0.00052	0.89	0.0036	0.96	-0.77	0.031	TRUE	FALSE	FALSE	FALSE	0.09	0.21	0.11	0.19	-0.31	0.68	1	0.21	0.5
fat	IV	FBgn0036590	CG13065	39786	25.4	0.19	0.014	0.57	0.047		-0.53	0.075	TRUE	FALSE	FALSE	FALSE	0.29	0.47	0.00048	0.0025	-0.83	0.44	0.97	0.38
fat	IV	FBgn0040349	CG3699	31046	32.34	735.36	0.012	0.59	0.043	0.81	-0.26	0.16	TRUE	FALSE	FALSE	FALSE	0.034	0.11	0.64	0.73	0.045	0.41	0.94	0.54	0.76
fat	IV	FBgn0020626	Osbp	42985	28.82	2140.07	0.0066	0.69	0.026	0.87	-0.38	0.078	TRUE	FALSE	FALSE	FALSE	0.03	0.1	0.8	0.86	0.032	0.66	1	0.43	0.68
fat	IV	FBgn0032018	CG7806	34140	24.39	1389.85	0.0062	0.7	0.025	0.87	-2	0.051	TRUE	FALSE	FALSE	FALSE	0.47	0.64	0.054	0.11	-1.3	0.64	1	0.22	0.51
fat	IV	FBgn0028671	Vha100-1	43442	29.97	5152.86	0.027	0.48	0.076	0.74	-0.17	0.16	TRUE	FALSE	FALSE	FALSE	0.032	0.11	2.3e-05	0.00022	-0.4	0.14	0.63	0.47	0.71
fat	IV	FBgn0029849	Efr	31553	24.58	725.41	0.00072	0.89	0.0047	0.96	-0.83	0.025	TRUE	FALSE	FALSE	FALSE	0.088	0.21	0.14	0.24	-0.31	0.73	1	0.81	0.91
fat	IV	FBgn0260799	p120ctn		23.18	970.44	0.032	0.46	0.088	0.73	-1.1	0.25	TRUE	FALSE	FALSE	FALSE	0.45	0.62	0.0031	0.011	-1.7	0.61	1	0.5	0.74
fat	IV	FBgn0034879	Rrp4	37731	26.51	450.84	0.00097	0.88	0.0058	0.95	-0.66	0.033	TRUE	FALSE	FALSE	FALSE	0.81	0.89	0.00045	0.0024	-0.72	0.12	0.61	0.22	0.52
fat	IV	FBgn0031304	CG4552	33289	24.12	1044.02	0.03	0.48	0.082	0.74	-0.8	0.13	TRUE	FALSE	FALSE	FALSE	0.89	0.93	0.045	0.095	-0.73	0.29	0.85	0.36	0.63
fat	IV	FBgn0029508	Tsp42Ea	59178	25.5	1611.18	0.038	0.44	0.099	0.71	-0.52	0.16	TRUE	FALSE	FALSE	FALSE	0.53	0.69	0.0058	0.019	-0.73	0.35	0.9	0.67	0.84
fat	IV	FBgn0000330	cm	31647	25.86	277.23	0.034	0.46	0.091	0.73	-0.39	0.17	TRUE	FALSE	FALSE	FALSE	0.26	0.44	0.51	0.62	-0.11	0.4	0.94	0.89	0.95
fat	IV	FBgn0031093	CG9581	33017	26.55	485.09	0.0056	0.73	0.023	0.89	-0.54	0.075	TRUE	FALSE	FALSE	FALSE	0.0052	0.03	0.19	0.3	0.23	0.95	1	0.69	0.85
fat	IV	FBgn0011204	cue	38174	26.67	5188.07	0.015	0.6	0.048	0.82	-0.68	0.1	TRUE	FALSE	FALSE	FALSE	0.45	0.62	0.13	0.21	-0.4	0.43	0.96	0.22	0.52
fat	IV	FBgn0037935	CG6834	41409	28.49	770.66	0.0046	0.76	0.02	0.9	-0.32	0.06	TRUE	FALSE	FALSE	FALSE	0.0089	0.043	0.37	0.49	0.09	0.68	1	0.0022	0.084
fat	IV	FBgn0010100	Acon	44149	36.02	8265.44	0.011	0.66	0.039	0.85	-0.19	0.071	TRUE	FALSE	TRUE	FALSE	0.22	0.39	0.32	0.44	-0.067	0.014	0.25	0.29	0.58
fat	IV	FBgn0261439	SdhA	37228	33.53	3255.06	0.0038	0.79	0.018	0.91	-0.31	0.053	TRUE	FALSE	FALSE	FALSE	0.051	0.15	0.71	0.79	-0.034	0.3	0.86	0.72	0.87
fat	IV	FBgn0033816	CG4679	36466	28.55	398.21	0.038	0.46	0.099	0.73	-0.41	0.096	TRUE	FALSE	FALSE	FALSE	0.00062	0.0064	2.3e-07	7.1e-06	-1.5	0.99	1	0.46	0.7
fat	IV	FBgn0035169	CG13890	38100	27.47	607.91	0.0048	0.77	0.021	0.9	-0.62	0.04	TRUE	FALSE	FALSE	FALSE	0.036	0.12	5.3e-06	7.3e-05	-1.2	0.84	1	0.14	0.44
fat	IV	FBgn0050045	Cpr49Aa	246413	33.75	6.26	0.024	0.56	0.071		-0.28	0.24	TRUE	FALSE	TRUE	FALSE	0.89	0.93	0.016	0.041	-0.31	0.034	0.34	0.94
fat	IV	FBgn0086377	Syx7	36173	24.19	878.67	0.00048	0.93	0.0034	0.97	-2.7	0.016	TRUE	FALSE	FALSE	FALSE	0.092	0.21	0.096	0.17	-1.1	0.91	1	0.17	0.46
fat	IV	FBgn0035526	CG1316	38526	27.14	438.62	0.023	0.57	0.069	0.8	-0.42	0.075	TRUE	FALSE	FALSE	FALSE	0.65	0.78	0.083	0.16	-0.31	0.17	0.69	0.3	0.58
fat	IV	FBgn0035499	Chd64	38490	32.61	1208.84	0.0058	0.77	0.024	0.9	-0.18	0.052	TRUE	FALSE	FALSE	FALSE	0.00017	0.0026	0.0022	0.0086	0.2	0.7	1	0.38	0.65
fat	IV	FBgn0050404	Tango11	246596	26.84	446.25	0.011	0.7	0.039	0.87	-0.62	0.082	TRUE	FALSE	FALSE	FALSE	0.82	0.9	0.021	0.053	-0.55	0.19	0.73	0.42	0.67
fat	IV	FBgn0031047	Rcd-1	32966	24.91	501.2	0.0015	0.89	0.0085	0.96	-1.4	0.031	TRUE	FALSE	FALSE	FALSE	0.51	0.67	0.012	0.034	-1.1	0.52	1	0.55	0.77
fat	IV	FBgn0026261	bonsai	37587	26.69	436.47	0.0063	0.78	0.025	0.9	-0.5	0.053	TRUE	FALSE	FALSE	FALSE	0.31	0.49	0.12	0.21	-0.26	0.33	0.89	0.25	0.54
fat	IV	FBgn0024432	Dlc90F	42199	28.27	251.65	0.032	0.55	0.088	0.79	-0.33	0.15	TRUE	FALSE	FALSE	FALSE	0.25	0.43	0.00089	0.0041	-0.56	0.3	0.86	0.55	0.77
fat	IV	FBgn0014092	CG4278	34970	28.84	265.11	0.0071	0.77	0.028	0.9	-0.35	0.058	TRUE	FALSE	FALSE	FALSE	0.4	0.58	0.083	0.16	-0.21	0.12	0.6	0.62	0.81
fat	IV	FBgn0051352	Unc-115a	261629	30.69	2875.64	0.0073	0.77	0.029	0.9	-0.32	0.072	TRUE	FALSE	FALSE	FALSE	0.0019	0.015	0.049	0.1	0.22	0.91	1	0.24	0.54
fat	IV	FBgn0035111	Dis3l2	38034	29.19	535.88	0.02	0.64	0.061	0.84	-0.8	0.12	TRUE	FALSE	FALSE	FALSE	0.075	0.19	0.91	0.94	0.036	0.86	1	0.94	0.97
fat	IV	FBgn0025724	beta'COP	45757	30.55	2689.44	0.026	0.6	0.075	0.82	-0.21	0.09	TRUE	FALSE	TRUE	FALSE	0.66	0.79	0.091	0.17	-0.16	0.017	0.27	0.75	0.88
fat	IV	FBgn0262509	nrm	40515	29.7	236.75	0.032	0.57	0.088	0.8	-0.21	0.16	TRUE	FALSE	FALSE	FALSE	0.14	0.28	0.00027	0.0016	-0.4	0.14	0.63	0.33	0.61
fat	IV	FBgn0051957	CG31957	319046	23.29	84.05	0.0046	0.84	0.02	0.93	-1.4	0.069	TRUE	FALSE	FALSE	FALSE	0.082	0.2	0.53	0.64	-0.27	0.89	1	0.38	0.65
fat	IV	FBgn0034331	CG15067	37102	30.04	2813.43	0.036	0.57	0.094	0.8	-0.28	0.19	TRUE	TRUE	FALSE	FALSE	0.0001	0.0018	0.00016	0.001	0.6	1	1	0.066	0.33
fat	IV	FBgn0036512	CG16979	39687	26.78	801.93	0.0057	0.82	0.024	0.92	-0.39	0.037	TRUE	FALSE	FALSE	FALSE	0.0042	0.026	0.15	0.25	0.18	0.9	1	0.82	0.92
fat	IV	FBgn0261552	ps	44258	25.47	4662.1	0.024	0.64	0.069	0.84	-1.3	0.11	TRUE	FALSE	FALSE	FALSE	0.013	0.054	0.16	0.26	0.76	0.98	1	0.091	0.37
fat	IV	FBgn0039312	CG10514	43052	28.39	1467.42	0.013	0.73	0.044	0.89	-0.4	0.12	TRUE	FALSE	FALSE	FALSE	4.7e-05	0.001	6.7e-09	4.4e-07	-1.5	1	1	0.86	0.94
fat	IV	FBgn0261279	lqfR	42632	28.21	1239.64	0.021	0.67	0.065	0.86	-0.22	0.056	TRUE	FALSE	FALSE	FALSE	0.0048	0.028	0.057	0.11	0.18	0.69	1	0.77	0.89
fat	IV	FBgn0261592	RpS6	31700	33.57	9.44	0.032	0.61	0.087	0.82	-0.16	0.2	TRUE	FALSE	FALSE	FALSE	0.0082	0.041	4.2e-06	6.2e-05	-0.45	0.31	0.87	0.49	0.73
fat	IV	FBgn0033810	CG4646	36459	28.75	265.45	0.016	0.72	0.051	0.88	-0.25	0.064	TRUE	FALSE	FALSE	FALSE	0.00042	0.0048	0.0029	0.011	0.32	0.95	1	0.83	0.92
fat	IV	FBgn0013987	MAPk-Ak2	44573	28.58	1286.7	0.015	0.75	0.05	0.89	-0.32	0.056	TRUE	FALSE	FALSE	FALSE	0.017	0.068	0.31	0.43	0.12	0.73	1	0.3	0.58
fat	IV	FBgn0015777	nrv2	33953	29.78	376.7	0.016	0.75	0.052	0.89	-0.38	0.073	TRUE	FALSE	FALSE	FALSE	0.25	0.42	0.34	0.46	-0.14	0.31	0.87	0.4	0.66
fat	IV	FBgn0025742	mtm	33845	24.33	570.26	0.017	0.74	0.055	0.89	-1.6	0.051	TRUE	FALSE	FALSE	FALSE	0.0099	0.046	0.16	0.26	0.88	0.99	1	0.75	0.88
fat	IV	FBgn0259785	pzg	40351	29.88	975.32	0.00074	0.96	0.0047	0.99	-0.31	0.01	TRUE	FALSE	FALSE	FALSE	0.014	0.058	0.84	0.88	-0.016	0.35	0.9	0.51	0.74
fat	IV	FBgn0030802	DENR	32679	28.45	606.55	0.025	0.72	0.072	0.88	-0.37	0.053	TRUE	FALSE	TRUE	FALSE	0.86	0.92	0.041	0.089	-0.33	0.084	0.51	0.37	0.65
fat	IV	FBgn0037955	CG6950	41433	32.09	2060.01	0.038	0.66	0.099	0.85	-0.15	0.1	TRUE	FALSE	TRUE	FALSE	0.2	0.37	0.71	0.79	-0.025	0.02	0.28	0.4	0.66
fat	IV	FBgn0083956	CG34120	318066	29.01	5989.72	0.012	0.82	0.041	0.92	-0.31	0.047	TRUE	FALSE	TRUE	FALSE	0.8	0.88	0.0053	0.017	-0.35	0.034	0.35	0.58	0.79
fat	IV	FBgn0031752	CG9044	33825	28.59	3068.53	0.016	0.79	0.053	0.91	-0.25	0.06	TRUE	FALSE	FALSE	FALSE	0.00054	0.0058	0.004	0.014	0.31	0.94	1	0.26	0.56
fat	IV	FBgn0035355	CG16985	38323	29.72	238.3	0.0056	0.89	0.023	0.96	-0.28	0.032	TRUE	TRUE	FALSE	FALSE	2.1e-05	0.00057	0.00011	0.00077	0.43	1	1	0.37	0.64
fat	IV	FBgn0031174	CG1486	33108	26.69	849.65	0.0097	0.85	0.035	0.94	-0.53	0.028	TRUE	FALSE	FALSE	FALSE	0.12	0.26	0.55	0.65	-0.11	0.61	1	0.32	0.61
fat	IV	FBgn0037777	CG11722	41227	27.81	135.23	0.032	0.72	0.087	0.88	-0.31	0.077	TRUE	FALSE	FALSE	FALSE	0.48	0.65	0.21	0.32	-0.17	0.15	0.66	0.88	0.94
fat	IV	FBgn0030594	fiz	32420	32.62	13232.6	0.018	0.8	0.057	0.92	-0.27	0.049	TRUE	FALSE	FALSE	FALSE	0.16	0.32	0.00021	0.0013	-0.48	0.19	0.73	0.2	0.49
fat	IV	FBgn0019662	qm	38816	26.18	196.31	0.012	0.85	0.041	0.94	-0.93	0.044	TRUE	TRUE	FALSE	FALSE	0.00016	0.0024	0.00098	0.0045	1.3	1	1	0.92	0.96
fat	IV	FBgn0034068	casp	36769	27.62	1060.84	0.036	0.72	0.094	0.88	-0.32	0.059	TRUE	FALSE	FALSE	FALSE	0.21	0.38	0.66	0.75	-0.063	0.35	0.9	0.25	0.54
fat	IV	FBgn0038197	foxo	41709	24.75	2636.54	0.0071	0.89	0.028	0.96	-1.3	0.032	TRUE	TRUE	FALSE	FALSE	0.00042	0.0048	0.0065	0.02	1.3	1	1	0.18	0.47
fat	IV	FBgn0028984	Spn88Ea	49804	29.15	605.18	0.002	0.95	0.011	0.98	-0.39	0.012	TRUE	FALSE	FALSE	FALSE	0.00027	0.0036	0.012	0.033	0.3	0.98	1	0.28	0.57
fat	IV	FBgn0032495	CG16820	34730	23.75	22.69	0.019	0.82	0.059	0.92	-1.1	0.082	TRUE	FALSE	FALSE	FALSE	0.0068	0.036	2.1e-06	3.9e-05	-2.9	0.99	1	0.86	0.94
fat	IV	FBgn0037181	CG11370	40486	22.95	1.58	0.015	0.86	0.048		-1.1	0.062	TRUE	FALSE	FALSE	FALSE	0.22	0.39	0.37	0.49	-0.37	0.74	1	0.6
fat	IV	FBgn0039936	Gyf	43842	27.81	1887.68	0.022	0.82	0.066	0.92	-0.27	0.062	TRUE	FALSE	TRUE	FALSE	0.7	0.82	0.066	0.13	-0.21	0.042	0.38	0.79	0.9
fat	IV	FBgn0038569	CG7218	42165	25.74	1236.97	0.004	0.95	0.018	0.98	-0.61	0.0075	TRUE	FALSE	FALSE	FALSE	0.0058	0.032	0.27	0.39	0.21	0.96	1	0.97	0.99
fat	IV	FBgn0003714	tko	31228	26.02	366.35	0.029	0.83	0.08	0.93	-0.62	0.034	TRUE	FALSE	FALSE	FALSE	0.51	0.67	0.17	0.27	-0.37	0.4	0.94	0.64	0.82
fat	IV	FBgn0014028	SdhB	35590	31.72	1286.48	0.03	0.83	0.083	0.93	-0.18	0.041	TRUE	FALSE	FALSE	FALSE	0.012	0.052	0.13	0.21	0.13	0.4	0.94	0.9	0.96
fat	IV	FBgn0036096	CG8003	39210	28.92	449	0.0086	0.93	0.032	0.97	-0.4	0.012	TRUE	FALSE	FALSE	FALSE	0.055	0.15	1.7e-05	0.00018	-0.79	0.6	1	0.41	0.67
fat	IV	FBgn0085446	CG34417	31591	24.91	2489.58	0.021	0.88	0.063	0.95	-0.66	0.037	TRUE	FALSE	FALSE	FALSE	0.011	0.049	0.15	0.25	0.39	0.96	1	0.61	0.81
fat	IV	FBgn0037779	CG12811	41229	25.54	1032.24	0.019	0.89	0.058	0.96	-0.57	0.032	TRUE	FALSE	FALSE	FALSE	0.1	0.23	0.89	0.93	-0.029	0.73	1	0.33	0.61
fat	IV	FBgn0031493	Sf3b2	33514	26.21	751.12	0.01	0.93	0.037	0.97	-0.45	0.014	TRUE	FALSE	FALSE	FALSE	0.29	0.46	0.21	0.31	-0.21	0.33	0.9	0.32	0.61
fat	IV	FBgn0030460	CG2453	32272	24.19	306.3	0.039	0.87	0.1	0.95	-1.3	0.032	TRUE	FALSE	FALSE	FALSE	0.5	0.66	0.23	0.34	-0.71	0.61	1	0.49	0.73
fat	IV	FBgn0030289	GCS1	32073	26.9	1200.68	0.017	0.94	0.055	0.98	-0.58	0.012	TRUE	FALSE	FALSE	FALSE	0.93	0.96	0.013	0.036	-0.61	0.17	0.69	0.57	0.78
fat	IV	FBgn0033317	CG8635	35850	29.65	1326.3	0.019	0.94	0.059	0.98	-0.19	0.014	TRUE	FALSE	TRUE	FALSE	0.4	0.58	0.19	0.29	-0.099	0.012	0.23	0.4	0.66
fat	IV	FBgn0034029	eIF2Bgamma	36722	28.99	614.2	0.0065	0.98	0.026	0.99	-0.23	0.0048	TRUE	FALSE	TRUE	FALSE	0.37	0.55	0.091	0.17	-0.13	0.018	0.28	0.44	0.69
fat	IV	FBgn0052407	CG32407	38667	27.38	86.66	0.026	0.92	0.074	0.97	-0.5	0.025	TRUE	FALSE	FALSE	FALSE	0.01	0.048	0.12	0.21	0.33	0.95	1	0.42	0.67
fat	IV	FBgn0025725	alphaCOP	38199	31.56	3283.36	0.014	0.95	0.048	0.98	-0.18	0.012	TRUE	FALSE	TRUE	FALSE	0.8	0.88	0.0066	0.021	-0.21	0.002	0.14	0.84	0.93
fat	IV	FBgn0085242	CG34213	5740468	23.7	43.32	0.0097	0.98	0.035	0.99	-1.1	0.0087	TRUE	TRUE	FALSE	FALSE	0.0014	0.012	0.024	0.058	0.93	1	1	0.96	0.98
fat	IV	FBgn0037880	CG17726	41349	25.74	297.06	0.0014	1	0.0081	1	-1	0.0009	TRUE	FALSE	FALSE	FALSE	0.65	0.78	0.00034	0.0019	-1.2	0.33	0.9	0.63	0.82
fat	IV	FBgn0034246	Dcr-2	36993	29.05	2145.87	0.03	0.95	0.083	0.98	-0.17	0.011	TRUE	FALSE	TRUE	FALSE	0.27	0.44	0.47	0.58	-0.052	0.018	0.28	0.038	0.28
fat	IV	FBgn0023545	PIG-K	31163	22.75	808.05	0.012	0.98	0.041	0.99	-1.3	0.0038	TRUE	FALSE	FALSE	FALSE	0.15	0.3	0.5	0.61	-0.32	0.83	1	0.94	0.97
fat	IV	FBgn0032913	CG9259	35372	28.7	1854.55	0.018	0.97	0.057	0.99	-0.45	0.012	TRUE	FALSE	FALSE	FALSE	0.0015	0.012	3.3e-07	9.4e-06	-1.4	0.99	1	0.74	0.88
fat	IV	FBgn0023512	eIF2Bepsilon	31156	28.2	952.91	0.013	0.99	0.045	0.99	-0.31	0.0026	TRUE	FALSE	TRUE	FALSE	0.92	0.95	0.0096	0.028	-0.33	0.028	0.32	0.4	0.66
fat	IV	FBgn0052425	CG32425	40273	23.25	3732.15	0.031	0.97	0.085	0.99	-1.3	0.0096	TRUE	FALSE	FALSE	FALSE	0.063	0.17	0.65	0.74	0.25	0.93	1	0.071	0.34
fat	IV	FBgn0003261	Rm62	40739	31.37	7509.13	0.016	0.99	0.053	1	-0.16	0.0013	TRUE	FALSE	FALSE	FALSE	0.0062	0.034	1.6e-06	3.2e-05	-0.42	0.18	0.7	0.63	0.82
fat	IV	FBgn0040502	CG8343	35544	24.29	13.7	0.0084		0.031		-2.3	0.13	TRUE	FALSE	FALSE	FALSE	0.17	0.33	0.35	0.47	-0.74	0.86	1
gut	I	FBgn0032066	LManIII	34203	31.12	6729.44	2.8e-15	3.1e-11	1.1e-11	9.8e-09	3.8	1.8	FALSE	TRUE	FALSE	FALSE	2.1e-07	5.3e-05	8.6e-11	1.8e-08	2	1	1	0.69	1
gut	I	FBgn0032068	LManV	34205	35.91	27577.7	9.8e-15	2.3e-10	2e-11	5.8e-08	2.7	1.6	FALSE	TRUE	FALSE	FALSE	1.3e-06	0.00017	1.3e-10	2.2e-08	1.5	1	1	0.76	1
gut	I	FBgn0032069	LManVI	34206	36.15	45950.9	9.5e-14	1.3e-10	1.3e-10	3.6e-08	2.5	1.6	FALSE	TRUE	FALSE	FALSE	5.6e-06	0.00043	1.4e-09	1e-07	1.4	1	1	0.57	1
gut	I	FBgn0003996	w	31271	25.56	3918.56	6.1e-11	1.1e-71	2.3e-08	1e-67	6.2	4.6	FALSE	FALSE	FALSE	FALSE	0.4	0.59	2.7e-10	3e-08	5.7	0.62	1	0.0032	0.37
gut	I	FBgn0034335	GstE1	37106	30.03	1808.13	9.2e-10	2.9e-11	1.6e-07	9.7e-09	1.6	1.6	FALSE	FALSE	FALSE	FALSE	0.00074	0.0095	1.3e-05	0.00012	0.8	0.98	1	0.0022	0.33
gut	I	FBgn0050360	Mal-A6	246565	34.82	123887	1.1e-08	4.4e-10	8.6e-07	1e-07	0.94	0.85	FALSE	TRUE	FALSE	FALSE	9.8e-06	0.00064	0.19	0.29	0.13	1	1	0.00068	0.21
gut	I	FBgn0037386	CG1208	40727	24.97	1554	4.8e-07	2.2e-21	1.3e-05	2.1e-18	3.9	1.9	FALSE	FALSE	FALSE	FALSE	0.36	0.56	5.8e-06	6e-05	3.2	0.67	1	0.0034	0.37
gut	I	FBgn0032067	LManIV	34204	32.2	327.39	1.1e-06	4.3e-11	2.5e-05	1.3e-08	2.9	1.8	FALSE	FALSE	FALSE	FALSE	0.11	0.28	0.00012	0.00071	2	0.85	1	0.99	1
gut	I	FBgn0051075	CG31075	43244	30.7	713.93	1.8e-09	8.7e-08	2.3e-07	1.2e-05	1.1	0.98	FALSE	FALSE	FALSE	FALSE	0.06	0.18	1.4e-07	3.3e-06	0.79	0.29	0.95	0.26	1
gut	I	FBgn0033296	Mal-A7	35829	33.11	20738.4	2.6e-09	1.5e-07	2.7e-07	1.9e-05	1.3	1	FALSE	FALSE	FALSE	FALSE	0.0039	0.029	7.3e-06	7.2e-05	0.75	0.9	1	0.0098	0.53
gut	I	FBgn0028516	ZnT35C	34890	27.8	1691.42	4e-10	3.8e-06	8.1e-08	0.0003	2.1	0.63	FALSE	FALSE	FALSE	FALSE	0.031	0.12	4.9e-08	1.4e-06	1.5	0.82	1	0.64	1
gut	I	FBgn0041629	Hexo2	31808	27.42	108.03	0.00015	5.4e-12	0.0011	2.1e-09	0.67	1.1	FALSE	FALSE	FALSE	FALSE	0.0036	0.027	0.96	0.98	0.0064	0.94	1	0.061	1
gut	I	FBgn0002571	Mal-A3	35826	31	8736.02	1.1e-08	1.4e-06	8.6e-07	0.00013	1.1	1.1	FALSE	TRUE	FALSE	FALSE	3.1e-05	0.0014	0.047	0.093	0.24	1	1	0.25	1
gut	I	FBgn0263199	Galk	39031	30.86	2344.68	8.3e-08	6.9e-07	3.9e-06	7e-05	0.76	0.77	FALSE	FALSE	TRUE	FALSE	0.42	0.61	6.3e-07	1e-05	0.66	0.034	0.49	0.46	1
gut	I	FBgn0000181	bic	45827	34.5	6381.66	3.6e-06	1.3e-07	6.3e-05	1.7e-05	0.75	0.36	FALSE	FALSE	FALSE	TRUE	0.12	0.28	0.00046	0.0021	0.49	0.32	0.97	0.00011	0.086
gut	I	FBgn0002570	Mal-A1	35824	35.68	169192	3.7e-07	1.7e-06	1.1e-05	0.00015	0.71	0.79	FALSE	FALSE	FALSE	FALSE	7.9e-05	0.0022	0.54	0.65	0.057	0.99	1	0.001	0.25
gut	I	FBgn0000079	Amy-p	47764	31.8	114107	0.00039	4.1e-10	0.0024	9.7e-08	0.54	0.87	FALSE	FALSE	FALSE	FALSE	0.071	0.2	0.12	0.2	0.2	0.49	1	0.011	0.55
gut	I	FBgn0063494	GstE6	37111	30.67	3280.7	3.9e-10	0.00048	8.1e-08	0.015	1	0.73	FALSE	TRUE	FALSE	FALSE	1.8e-07	5e-05	0.48	0.6	0.06	1	1	0.041	0.88
gut	I	FBgn0036824	CG3902	40059	34.88	3858.75	3.2e-08	5.3e-05	1.9e-06	0.0026	0.6	0.61	FALSE	FALSE	FALSE	FALSE	2e-05	0.001	0.26	0.37	0.075	0.97	1	0.59	1
gut	I	FBgn0261575	tobi	43072	34.64	61633.2	1.6e-06	6.1e-06	3.4e-05	0.00045	0.87	0.89	FALSE	FALSE	FALSE	FALSE	0.21	0.4	6.5e-05	0.00042	0.64	0.26	0.92	0.00035	0.15
gut	I	FBgn0027657	glob1	41930	32.49	1222.68	1.5e-09	0.0015	2.2e-07	0.037	1.1	0.51	FALSE	FALSE	TRUE	FALSE	0.38	0.58	9.2e-09	3.5e-07	0.97	0.064	0.61	0.91	1
gut	I	FBgn0033367	PPO2	35910	27.71	99.97	8.1e-06	3.2e-06	0.00012	0.00026	0.82	1.3	FALSE	FALSE	FALSE	FALSE	0.15	0.34	1.6e-07	3.6e-06	1.1	0.37	1	0.65	1
gut	I	FBgn0035901	CG6745	38969	28.02	182.72	1.2e-05	4.5e-06	0.00016	0.00035	1.7	1.1	FALSE	FALSE	FALSE	FALSE	0.0087	0.051	0.086	0.15	0.53	0.98	1	0.083	1
gut	I	FBgn0052407	CG32407	38667	30.28	886.78	6.2e-11	0.016	2.3e-08	0.2	1.5	0.59	FALSE	TRUE	FALSE	FALSE	1.9e-05	0.001	2.3e-05	0.00018	0.61	1	1	0.94	1
gut	I	FBgn0029155	Men-b	43936	31	2458.02	2.3e-07	0.00024	7.7e-06	0.0086	0.72	0.85	FALSE	FALSE	TRUE	FALSE	0.75	0.86	5e-07	8.6e-06	0.68	0.014	0.39	0.12	1
gut	I	FBgn0001248	Idh	44291	35.49	26353.9	4.7e-09	0.0028	4.4e-07	0.059	0.74	0.66	FALSE	TRUE	FALSE	FALSE	4.6e-06	0.00037	0.19	0.29	0.096	1	1	0.3	1
gut	I	FBgn0030593	CG9512	32419	32.8	11615	1e-05	1.1e-05	0.00014	0.00072	0.69	0.71	FALSE	FALSE	FALSE	FALSE	0.3	0.5	0.00025	0.0013	0.52	0.15	0.79	0.48	1
gut	I	FBgn0037146	CG7470	40443	36.06	22028.6	2.1e-09	0.0053	2.4e-07	0.093	0.82	0.29	FALSE	FALSE	FALSE	FALSE	9.9e-05	0.0026	0.00079	0.0033	0.3	0.95	1	0.21	1
gut	I	FBgn0010226	GstS1	36927	29.82	568.56	1.2e-07	0.00062	5e-06	0.018	0.93	0.54	FALSE	FALSE	FALSE	FALSE	0.052	0.17	3.1e-05	0.00023	0.6	0.45	1	0.56	1
gut	I	FBgn0260746	Ect3	41457	28.35	74.26	9.4e-05	2e-06	0.00078	0.00018	0.92	1	FALSE	FALSE	FALSE	FALSE	0.51	0.69	0.00076	0.0032	0.75	0.27	0.93	0.002	0.33
gut	I	FBgn0021765	scu	32789	35.04	1763.85	2e-09	0.011	2.4e-07	0.15	0.84	0.31	FALSE	FALSE	TRUE	FALSE	0.5	0.69	8e-09	3.2e-07	0.77	0.011	0.39	0.82	1
gut	I	FBgn0037973	CG18547	41452	32.19	4073.98	8.6e-05	9.6e-06	0.00073	0.00063	0.7	0.86	FALSE	FALSE	FALSE	FALSE	0.62	0.78	0.0004	0.0019	0.61	0.12	0.73	0.032	0.84
gut	I	FBgn0000556	eEF1alpha1	36271	36.7	122439	1.2e-06	0.00062	2.7e-05	0.018	0.46	0.4	FALSE	FALSE	TRUE	FALSE	0.24	0.44	3.6e-05	0.00026	0.35	0.011	0.39	0.88	1
gut	I	FBgn0037354	CG12171	40690	33.22	2704.12	2.3e-05	5.7e-05	0.00025	0.0028	0.59	0.45	FALSE	FALSE	FALSE	FALSE	0.0031	0.025	0.4	0.52	0.089	0.86	1	0.0082	0.51
gut	I	FBgn0035661	CG10477	38679	26.1	11662	3.9e-06	0.00028	6.7e-05	0.0096	1.5	0.56	FALSE	FALSE	FALSE	FALSE	0.14	0.32	0.00035	0.0017	0.99	0.67	1	0.046	0.92
gut	I	FBgn0001089	Gal	33839	32.48	8328.84	4.1e-08	0.0055	2.4e-06	0.096	1	0.43	FALSE	FALSE	FALSE	FALSE	0.012	0.064	6.5e-05	0.00042	0.58	0.73	1	0.3	1
gut	I	FBgn0016075	vkg	33726	33.37	363.67	1.6e-07	0.0027	6e-06	0.057	0.61	0.77	FALSE	FALSE	TRUE	FALSE	0.38	0.57	2e-08	6.5e-07	0.7	0.014	0.39	0.85	1
gut	I	FBgn0035679	CG10467	38697	32.23	3203.57	2e-06	0.00052	4.1e-05	0.016	0.67	0.52	FALSE	FALSE	TRUE	FALSE	0.27	0.47	5e-05	0.00034	0.52	0.098	0.69	0.063	1
gut	I	FBgn0033879	CG6543	36536	34.8	1875.39	6.7e-06	0.0002	0.0001	0.0076	0.49	0.46	FALSE	FALSE	TRUE	FALSE	0.61	0.77	1.6e-06	2.2e-05	0.54	0.0092	0.39	0.12	1
gut	I	FBgn0034354	GstE11	37128	28.68	184.03	1.2e-05	0.00012	0.00015	0.0051	0.94	0.86	FALSE	FALSE	FALSE	FALSE	0.0041	0.03	0.19	0.29	0.21	0.95	1	0.13	1
gut	I	FBgn0035473	mge	38459	28.38	591.91	2.5e-07	0.0028	8.3e-06	0.058	1	0.39	FALSE	FALSE	TRUE	FALSE	0.75	0.86	1.1e-07	2.7e-06	1.1	0.063	0.6	0.016	0.62
gut	I	FBgn0016715	Reg-2	38075	31.02	1038.03	2.5e-08	0.0099	1.6e-06	0.15	0.9	0.43	FALSE	FALSE	FALSE	FALSE	0.024	0.098	1.3e-05	0.00012	0.57	0.48	1	0.14	1
gut	I	FBgn0035763	CG8602	38808	28.17	1690.96	3.1e-10	0.06	7e-08	0.44	2.5	0.21	FALSE	FALSE	FALSE	FALSE	0.1	0.26	9.2e-09	3.5e-07	2	0.69	1	0.36	1
gut	I	FBgn0017558	Pdk	35970	28.74	963.23	2.6e-07	0.0042	8.4e-06	0.079	0.74	0.5	FALSE	FALSE	TRUE	FALSE	0.28	0.48	4.8e-06	5.1e-05	0.59	0.075	0.63	0.16	1
gut	I	FBgn0030484	GstT4	32299	32.25	7431.13	0.00066	6.1e-06	0.0035	0.00045	0.32	0.79	FALSE	FALSE	TRUE	FALSE	0.13	0.31	0.076	0.14	0.15	0.074	0.63	0.54	1
gut	I	FBgn0027611	LManII	34437	34.3	17694.6	2.3e-09	0.044	2.5e-07	0.37	1.1	0.34	FALSE	TRUE	FALSE	FALSE	6.3e-07	0.0001	0.71	0.79	0.037	1	1	0.86	1
gut	I	FBgn0026602	Ady43A	44750	25.21	791.35	0.0071	1.8e-07	0.023	2.2e-05	1.3	0.98	FALSE	FALSE	FALSE	FALSE	0.059	0.18	0.85	0.9	0.08	0.92	1	0.035	0.85
gut	I	FBgn0038771	CG4390	42396	29.08	1029.02	0.013	9.3e-08	0.036	1.3e-05	0.54	0.71	FALSE	FALSE	FALSE	FALSE	0.025	0.1	0.51	0.62	-0.13	0.88	1	0.011	0.57
gut	I	FBgn0037974	CG12224	41453	27.11	500.08	0.00036	2.5e-05	0.0022	0.0014	1.2	1	FALSE	FALSE	FALSE	FALSE	0.0016	0.015	0.39	0.5	-0.24	0.99	1	0.0014	0.29
gut	I	FBgn0031703	CG12512	33766	32.77	2482.97	2.8e-07	0.0079	8.9e-06	0.12	0.7	0.53	FALSE	FALSE	FALSE	FALSE	0.00093	0.011	0.028	0.062	0.21	0.88	1	0.58	1
gut	I	FBgn0032945	CG8665	35407	30.29	2460.99	2.6e-07	0.0099	8.4e-06	0.15	0.87	0.48	FALSE	FALSE	FALSE	FALSE	0.01	0.057	0.00095	0.0038	0.43	0.74	1	0.12	1
gut	I	FBgn0024957	Irp-1B	41269	33.15	6397.95	8e-09	0.066	6.7e-07	0.46	0.82	0.31	FALSE	FALSE	FALSE	FALSE	0.00052	0.0076	0.00056	0.0025	0.34	0.88	1	0.32	1
gut	I	FBgn0003517	sta	31106	35.53	35243.7	0.0025	7.7e-06	0.01	0.00053	0.45	0.47	FALSE	FALSE	TRUE	FALSE	0.65	0.8	0.00061	0.0027	0.54	0.088	0.66	0.036	0.86
gut	I	FBgn0032253	LManI	34436	30.94	3095.35	2.4e-06	0.013	4.8e-05	0.17	0.82	0.53	FALSE	TRUE	FALSE	FALSE	0.00014	0.003	0.98	0.99	-0.0032	0.99	1	0.99	1
gut	I	FBgn0000299	Col4a1	33727	32.81	419.12	1.5e-05	0.0043	0.00018	0.08	0.46	0.73	FALSE	FALSE	FALSE	FALSE	0.021	0.093	2.4e-08	7.5e-07	0.73	0.28	0.94	0.22	1
gut	I	FBgn0029176	eEF1gamma	44791	33.92	17926.1	0.0012	8.6e-05	0.0055	0.0039	0.3	0.43	FALSE	FALSE	TRUE	FALSE	0.35	0.55	6.3e-05	0.00041	0.4	0.021	0.43	0.12	1
gut	I	FBgn0052495	Gss2	318053	32.93	9107.13	1.1e-05	0.0054	0.00015	0.095	0.4	0.41	FALSE	FALSE	FALSE	FALSE	3.8e-05	0.0015	0.11	0.19	-0.11	0.96	1	0.77	1
gut	I	FBgn0027945	ppl	40349	27.97	180.62	0.00048	0.00026	0.0028	0.009	0.62	0.55	FALSE	FALSE	FALSE	FALSE	0.18	0.37	0.034	0.073	0.34	0.4	1	0.05	0.95
gut	I	FBgn0032839	AANATL3	35285	30.24	1955.06	1.2e-10	0.34	3.7e-08	0.86	1.7	0.18	FALSE	TRUE	FALSE	FALSE	4.7e-11	1.9e-07	3.5e-06	4.1e-05	-0.83	1	1	0.017	0.65
gut	I	FBgn0039751	CG1983	43588	29.54	528.19	1.9e-07	0.049	6.8e-06	0.39	0.76	0.3	FALSE	FALSE	FALSE	FALSE	0.00012	0.0028	0.22	0.32	0.12	0.98	1	0.74	1
gut	I	FBgn0025687	LKRSDH	34064	29.23	736.73	0.00036	0.00044	0.0022	0.014	0.59	0.42	FALSE	FALSE	FALSE	FALSE	0.43	0.62	3.1e-05	0.00023	0.75	0.17	0.81	0.2	1
gut	I	FBgn0261596	RpS24	37589	33.4	10912.5	6.8e-06	0.0098	0.0001	0.15	0.83	0.35	FALSE	FALSE	FALSE	FALSE	0.00042	0.0067	0.86	0.91	0.023	0.99	1	0.27	1
gut	I	FBgn0003076	Pgm	44010	32.68	7482.34	8.4e-05	0.0019	0.00072	0.043	0.41	0.42	FALSE	FALSE	TRUE	FALSE	0.33	0.53	0.0018	0.0066	0.3	0.032	0.48	0.2	1
gut	I	FBgn0033297	Mal-A8	35830	30.18	13526.2	3.1e-06	0.019	5.7e-05	0.22	0.7	0.56	FALSE	FALSE	FALSE	FALSE	0.025	0.1	0.0048	0.014	0.34	0.56	1	0.22	1
gut	I	FBgn0002569	Mal-A2	35825	30.43	12791	2.3e-06	0.023	4.6e-05	0.25	0.7	0.4	FALSE	TRUE	FALSE	FALSE	8.1e-06	0.00054	0.071	0.13	-0.2	1	1	0.12	1
gut	I	FBgn0036321	CG14120	39463	29.49	10416.6	5.6e-05	0.0032	0.00053	0.065	0.84	0.5	FALSE	TRUE	FALSE	FALSE	0.00027	0.0049	0.26	0.38	-0.19	1	1	0.25	1
gut	I	FBgn0052068	Adi1	326189	31.91	3084.13	4.8e-08	0.11	2.6e-06	0.59	0.9	0.34	FALSE	FALSE	TRUE	FALSE	0.8	0.89	2.7e-08	8.2e-07	0.94	0.023	0.44	0.67	1
gut	I	FBgn0002719	Men	47173	32.63	7758.4	1.8e-05	0.008	0.00021	0.12	0.55	0.38	FALSE	FALSE	FALSE	FALSE	0.00078	0.0097	0.92	0.95	0.0091	0.93	1	0.39	1
gut	I	FBgn0038516	P5cr-2	42106	30.82	2024.91	1.8e-10	0.4	4.5e-08	0.9	1.3	0.14	FALSE	TRUE	FALSE	FALSE	6.6e-05	0.002	2.5e-05	0.00019	0.59	0.99	1	0.52	1
gut	I	FBgn0037817	Cyp12e1	41272	27.95	247.66	6.2e-05	0.0043	0.00057	0.08	0.79	0.49	FALSE	FALSE	FALSE	FALSE	0.31	0.5	0.0016	0.0058	0.57	0.3	0.95	0.32	1
gut	I	FBgn0027356	Amph	36383	31.83	831.93	4.6e-08	0.13	2.6e-06	0.64	0.59	0.32	FALSE	FALSE	TRUE	FALSE	0.098	0.25	1.2e-09	8.6e-08	0.75	0.032	0.48	0.2	1
gut	I	FBgn0024754	Flo1	36726	31.22	458.68	4.2e-06	0.023	7.1e-05	0.25	0.51	0.28	FALSE	FALSE	TRUE	FALSE	0.73	0.85	1.1e-05	0.0001	0.48	0.0071	0.39	0.19	1
gut	I	FBgn0086904	Nacalpha	36409	32.52	7934.97	0.024	3.9e-06	0.062	0.00031	0.28	0.47	FALSE	FALSE	FALSE	FALSE	0.22	0.42	0.00051	0.0023	0.48	0.19	0.85	0.0037	0.37
gut	I	FBgn0038136	CG8774	41635	29.52	10371.4	7.7e-09	0.22	6.6e-07	0.78	1.4	0.2	FALSE	TRUE	FALSE	FALSE	6.7e-06	0.00048	0.21	0.31	0.18	1	1	0.49	1
gut	I	FBgn0030478	CG1640	32292	34.35	6913.97	8.2e-08	0.12	3.9e-06	0.61	0.49	0.19	FALSE	FALSE	FALSE	FALSE	3.6e-05	0.0015	0.35	0.47	0.054	0.87	1	0.49	1
gut	I	FBgn0010424	TpnC73F	39916	32.82	356.56	1.9e-08	0.18	1.4e-06	0.72	1.2	0.35	FALSE	FALSE	FALSE	FALSE	0.27	0.47	2.8e-07	5.4e-06	0.99	0.22	0.87	0.66	1
gut	I	FBgn0022959	yps	39377	30.93	1000.07	2.1e-07	0.093	7.5e-06	0.55	0.78	0.34	FALSE	FALSE	TRUE	FALSE	0.99	0.99	2e-07	4.2e-06	0.78	0.011	0.39	0.79	1
gut	I	FBgn0003515	st	39836	25.49	2356.55	6.2e-09	0.25	5.5e-07	0.8	4.7	0.17	FALSE	FALSE	FALSE	FALSE	0.48	0.67	1.4e-09	1e-07	5.1	0.57	1	0.66	1
gut	I	FBgn0039857	RpL6	43723	34.46	21230.9	0.0016	0.00033	0.0072	0.011	0.36	0.39	FALSE	FALSE	FALSE	FALSE	0.0014	0.014	0.12	0.2	-0.16	0.89	1	0.3	1
gut	I	FBgn0034229	CG4847	36973	25.69	102.27	3.4e-08	0.19	2e-06	0.74	5.6	0.33	FALSE	TRUE	FALSE	FALSE	0.00011	0.0026	0.039	0.081	1.3	1	1	0.54	1
gut	I	FBgn0035499	Chd64	38490	34.9	3713.77	4.4e-07	0.089	1.2e-05	0.54	0.86	0.29	FALSE	FALSE	FALSE	FALSE	0.011	0.059	0.0017	0.0061	0.41	0.75	1	0.46	1
gut	I	FBgn0000064	Ald	43183	36.36	5286.86	1e-06	0.066	2.4e-05	0.46	0.54	0.35	FALSE	FALSE	FALSE	FALSE	0.064	0.19	0.0003	0.0015	0.33	0.11	0.71	0.83	1
gut	I	FBgn0039774	CDase	43618	29.91	3176.48	9.2e-05	0.0059	0.00077	0.1	0.86	0.61	FALSE	FALSE	FALSE	FALSE	0.0023	0.02	1	1	0.00096	0.98	1	0.46	1
gut	I	FBgn0028737	eEF1beta	45249	34.69	8477.76	7.1e-07	0.08	1.8e-05	0.51	0.61	0.26	FALSE	FALSE	TRUE	FALSE	0.54	0.72	1.5e-07	3.4e-06	0.68	0.016	0.4	0.46	1
gut	I	FBgn0035298	SCOT	38261	33.88	2020.56	5.6e-08	0.18	3e-06	0.72	0.69	0.24	FALSE	FALSE	TRUE	FALSE	0.37	0.57	5.3e-07	8.8e-06	0.59	0.021	0.43	0.66	1
gut	I	FBgn0034390	CG15093	37166	34.54	2787.48	0.00038	0.0022	0.0023	0.05	0.34	0.58	FALSE	FALSE	FALSE	FALSE	0.002	0.018	0.46	0.58	-0.059	0.71	1	0.7	1
gut	I	FBgn0262782	Mdh1	34414	34.67	6764.31	1.7e-07	0.15	6.5e-06	0.67	0.62	0.2	FALSE	FALSE	FALSE	FALSE	0.028	0.11	0.00012	0.00071	0.37	0.2	0.86	0.54	1
gut	I	FBgn0034117	CG7997	36829	29.43	168.47	0.0016	0.00065	0.0072	0.019	0.39	0.72	FALSE	FALSE	TRUE	FALSE	0.56	0.73	0.01	0.027	0.3	0.056	0.59	0.35	1
gut	I	FBgn0014427	CG11899	46391	31.33	899.39	5.6e-05	0.012	0.00053	0.17	0.6	0.5	FALSE	FALSE	FALSE	FALSE	0.14	0.31	7.3e-07	1.1e-05	0.85	0.29	0.95	0.4	1
gut	I	FBgn0086355	Tpi	43582	34.24	3961.35	4.5e-05	0.016	0.00045	0.2	0.34	0.36	FALSE	FALSE	TRUE	FALSE	0.22	0.41	0.0023	0.0079	0.23	0.01	0.39	0.82	1
gut	I	FBgn0038658	CG14292	42264	28.36	2729.24	0.0036	0.00038	0.013	0.013	0.65	0.63	FALSE	FALSE	FALSE	FALSE	0.66	0.8	0.014	0.035	0.53	0.22	0.87	0.76	1
gut	I	FBgn0039697	CG7834	43515	35.21	3210.14	6.6e-07	0.11	1.7e-05	0.59	0.53	0.22	FALSE	FALSE	TRUE	FALSE	0.63	0.78	2.5e-06	3e-05	0.48	0.0044	0.38	0.83	1
gut	I	FBgn0010423	TpnC47D	36195	30.49	207.3	7.5e-11	0.65	2.5e-08	0.96	1.5	0.11	FALSE	FALSE	FALSE	FALSE	0.046	0.16	4e-09	1.9e-07	1.2	0.5	1	0.86	1
gut	I	FBgn0051472	sgll	40925	29.18	1228.89	1.3e-05	0.037	0.00017	0.33	0.65	0.33	FALSE	FALSE	FALSE	FALSE	0.021	0.091	0.029	0.063	0.26	0.62	1	0.81	1
gut	I	FBgn0035422	RpL28	38397	34.72	4324.43	0.00023	0.0066	0.0016	0.11	0.41	0.38	FALSE	FALSE	FALSE	FALSE	0.012	0.062	0.55	0.65	0.054	0.53	1	0.23	1
gut	I	FBgn0011296	l(2)efl	37744	34.4	544.22	5.5e-09	0.4	5e-07	0.9	0.71	0.22	FALSE	FALSE	TRUE	FALSE	0.96	0.98	6.1e-09	2.6e-07	0.71	0.0014	0.31	0.87	1
gut	I	FBgn0063667	CG32335	261663	24.64	117.54	0.0016	0.0015	0.0072	0.037	1.2	0.65	FALSE	FALSE	FALSE	FALSE	0.0072	0.045	0.57	0.67	-0.19	0.98	1	0.052	0.97
gut	I	FBgn0013432	bcn92	31186	27.59	48.03	0.00027	0.0082	0.0018	0.13	0.76	0.58	FALSE	FALSE	FALSE	FALSE	0.56	0.73	0.0018	0.0064	0.62	0.21	0.87	0.8	1
gut	I	FBgn0033446	CG1648	36009	31.27	1684.97	0.022	6.6e-05	0.057	0.0031	0.33	0.95	FALSE	FALSE	FALSE	FALSE	1.3e-05	0.00076	2.6e-09	1.5e-07	1.4	1	1	0.44	1
gut	I	FBgn0031533	CG2772	33559	27.16	1896.98	0.0071	0.00036	0.023	0.012	0.91	0.74	FALSE	FALSE	FALSE	FALSE	0.13	0.3	0.44	0.55	0.24	0.78	1	0.26	1
gut	I	FBgn0040942	CG12643	50416	24.83	168.61	0.0026	0.0013	0.01	0.032	0.61	0.6	FALSE	FALSE	FALSE	FALSE	0.11	0.27	0.27	0.39	0.2	0.62	1	0.33	1
gut	I	FBgn0262559	Mdh2	42185	36.6	6135.55	2.2e-07	0.24	7.7e-06	0.79	0.5	0.21	FALSE	FALSE	FALSE	FALSE	0.0021	0.019	0.0071	0.02	0.19	0.38	1	0.68	1
gut	I	FBgn0034356	CG10924	37130	27.16	279.58	1.2e-05	0.066	0.00015	0.46	1.4	0.26	FALSE	FALSE	FALSE	FALSE	0.0029	0.024	0.27	0.38	0.26	0.99	1	0.37	1
gut	I	FBgn0033451	CG1665	36014	30.84	744.69	4.7e-08	0.37	2.6e-06	0.88	0.62	0.13	FALSE	FALSE	FALSE	FALSE	0.00053	0.0076	0.0066	0.019	0.21	0.76	1	0.47	1
gut	I	FBgn0011556	zetaTry	36216	30.97	5213.16	9.2e-08	0.33	4.3e-06	0.85	1.2	0.21	FALSE	TRUE	FALSE	FALSE	6.5e-05	0.002	0.21	0.31	0.18	1	1	0.47	1
gut	I	FBgn0027525	LTV1	36146	27.2	2310.82	0.00023	0.016	0.0015	0.2	0.86	0.29	FALSE	FALSE	FALSE	FALSE	0.0072	0.045	6e-08	1.5e-06	1.7	0.95	1	0.38	1
gut	I	FBgn0026090	CG14812	31137	29.68	291.23	0.00021	0.017	0.0014	0.21	0.46	0.34	FALSE	FALSE	TRUE	FALSE	0.53	0.71	0.0015	0.0056	0.37	0.046	0.55	0.4	1
gut	I	FBgn0038652	CG7720	42257	29.15	12151.2	1.6e-05	0.073	0.0002	0.49	1.3	0.33	FALSE	FALSE	FALSE	FALSE	0.034	0.13	0.018	0.042	0.59	0.88	1	0.62	1
gut	I	FBgn0037057	CG10512	40339	30.87	669.17	6.9e-06	0.1	0.0001	0.58	0.93	0.2	FALSE	FALSE	FALSE	FALSE	0.0062	0.041	0.076	0.14	0.28	0.92	1	0.94	1
gut	I	FBgn0012036	Aldh	34256	34.94	9936.1	1.9e-10	0.75	4.6e-08	0.98	0.91	0.052	FALSE	FALSE	FALSE	FALSE	0.00022	0.0042	5.9e-06	6e-05	0.45	0.88	1	0.73	1
gut	I	FBgn0051343	CG31343	326133	33.34	50458.6	8.7e-10	0.68	1.6e-07	0.97	1.1	0.078	FALSE	FALSE	FALSE	FALSE	0.00012	0.0027	0.00015	0.00086	0.44	0.98	1	0.73	1
gut	I	FBgn0022023	eIF3h	45682	30.47	3742.92	0.0013	0.0057	0.0061	0.097	0.24	0.36	FALSE	FALSE	TRUE	FALSE	0.097	0.25	0.2	0.31	0.083	0.026	0.45	0.22	1
gut	I	FBgn0027610	Dic1	41640	31.52	681.99	0.00049	0.013	0.0028	0.17	0.51	0.54	FALSE	FALSE	TRUE	FALSE	0.58	0.75	0.0029	0.0095	0.42	0.084	0.66	0.62	1
gut	I	FBgn0038829	CG17271	42463	31.04	845.68	0.0017	0.005	0.0072	0.089	0.45	0.44	FALSE	FALSE	FALSE	FALSE	0.025	0.1	0.81	0.87	0.03	0.67	1	0.26	1
gut	I	FBgn0038467	AdSL	42051	30.29	545.5	7e-05	0.046	0.00063	0.37	0.54	0.21	FALSE	FALSE	FALSE	FALSE	0.022	0.096	0.12	0.21	0.17	0.58	1	0.31	1
gut	I	FBgn0036316	CG10960	39458	26.47	1517.49	0.021	0.00027	0.054	0.0094	0.91	0.6	FALSE	FALSE	FALSE	FALSE	0.14	0.31	0.74	0.81	0.12	0.8	1	0.27	1
gut	I	FBgn0261602	RpL8	44251	34.63	34134.7	0.00013	0.034	0.00096	0.31	0.37	0.32	FALSE	FALSE	FALSE	FALSE	0.0065	0.042	0.61	0.71	0.039	0.46	1	0.84	1
gut	I	FBgn0002031	l(2)37Cc	49168	34.05	1489.01	2.7e-06	0.18	5.3e-05	0.72	0.51	0.14	FALSE	FALSE	TRUE	FALSE	0.77	0.87	1.2e-06	1.7e-05	0.54	0.0051	0.39	0.035	0.85
gut	I	FBgn0034871	CG3906	37721	28.9	8430.08	0.0039	0.0026	0.014	0.055	0.4	0.54	FALSE	FALSE	FALSE	FALSE	0.17	0.35	0.22	0.32	0.15	0.29	0.95	0.085	1
gut	I	FBgn0032299	CG17127	34489	32.54	5.97	4.4e-09	0.62	4.2e-07		1.2	0.12	FALSE	FALSE	FALSE	FALSE	0.12	0.28	1.9e-10	2.5e-08	1.5	0.33	0.98	0.28
gut	I	FBgn0010357	betaTry	47901	32.03	129552	7.3e-08	0.42	3.7e-06	0.91	1.4	0.13	FALSE	TRUE	FALSE	FALSE	0.0002	0.0041	0.041	0.084	0.34	1	1	0.39	1
gut	I	FBgn0030653	CG7860	32488	31.09	852.58	0.0074	0.0013	0.024	0.032	0.4	0.39	FALSE	FALSE	FALSE	FALSE	0.62	0.77	0.034	0.072	0.31	0.11	0.71	0.28	1
gut	I	FBgn0031520	CG8837	33545	25.71	703.69	0.017	0.00044	0.046	0.014	1.1	0.51	FALSE	FALSE	FALSE	FALSE	0.29	0.48	0.3	0.41	0.45	0.7	1	0.91	1
gut	I	FBgn0035850	Atg18a	38913	27.2	1148.01	0.00026	0.028	0.0017	0.28	0.94	0.24	FALSE	FALSE	FALSE	FALSE	0.01	0.057	0.64	0.74	0.098	0.95	1	0.55	1
gut	I	FBgn0001124	Got1	36782	32.74	4928.04	9e-06	0.14	0.00013	0.65	0.54	0.2	FALSE	FALSE	FALSE	FALSE	0.031	0.12	0.011	0.029	0.25	0.35	0.99	0.76	1
gut	I	FBgn0004117	Tm2	41853	35.68	1741.68	2.2e-06	0.22	4.4e-05	0.77	0.5	0.31	FALSE	FALSE	FALSE	FALSE	0.039	0.14	0.0016	0.0059	0.27	0.15	0.79	0.58	1
gut	I	FBgn0035243	CG13926	38192	26.42	97.79	1.1e-05	0.13	0.00015	0.64	1.5	0.29	FALSE	FALSE	FALSE	FALSE	0.015	0.074	0.039	0.08	0.54	0.95	1	0.067	1
gut	I	FBgn0004910	Eip63F-1	47878	27.77	803.94	6.8e-09	0.63	5.9e-07	0.96	1.8	0.071	FALSE	FALSE	FALSE	FALSE	0.011	0.058	7.3e-06	7.2e-05	1.1	0.92	1	0.11	1
gut	I	FBgn0039099	GILT2	42788	30.41	174.7	8.4e-07	0.31	2.1e-05	0.84	1.3	0.18	FALSE	FALSE	FALSE	FALSE	0.00079	0.0098	0.11	0.19	0.3	0.99	1	0.39	1
gut	I	FBgn0004777	Ccp84Ag	40819	30.03	0.16	3e-08	0.55	1.9e-06		0.79	0.034	FALSE	FALSE	TRUE	FALSE	0.65	0.8	1.1e-08	4e-07	0.85	0.015	0.39	0.98
gut	I	FBgn0034439	CG10062	37224	24.34	339.61	0.044	0.00018	0.097	0.0071	1.3	0.83	FALSE	FALSE	FALSE	FALSE	0.32	0.52	0.48	0.59	0.45	0.73	1	0.37	1
gut	I	FBgn0085491	CG34462	5740319	25.96	8.6	1.2e-07	0.47	5.2e-06	0.92	2.9	0.17	FALSE	FALSE	FALSE	FALSE	0.002	0.018	8.4e-11	1.8e-08	4.7	1	1	0.89
gut	I	FBgn0033294	Mal-A4	35827	31.27	10706.1	0.0028	0.0069	0.011	0.11	0.42	0.58	FALSE	FALSE	FALSE	FALSE	0.0011	0.012	0.056	0.11	-0.25	0.96	1	0.24	1
gut	I	FBgn0264695	Mhc	35007	38.6	13782	3.7e-07	0.4	1.1e-05	0.9	0.48	0.23	FALSE	FALSE	TRUE	FALSE	0.15	0.32	2.4e-05	0.00018	0.35	0.014	0.39	0.81	1
gut	I	FBgn0002525	Lam	33782	32.59	349.95	1.7e-06	0.3	3.7e-05	0.83	0.42	0.18	FALSE	FALSE	TRUE	FALSE	0.29	0.49	1.1e-07	2.7e-06	0.51	0.0045	0.38	0.71	1
gut	I	FBgn0036279	Ncc69	39410	27.61	1617.93	0.015	0.0013	0.042	0.032	0.88	0.41	FALSE	FALSE	FALSE	FALSE	0.18	0.37	0.00021	0.0011	1.5	0.74	1	0.0098	0.53
gut	I	FBgn0003134	Pp1alpha-96A	42922	25.6	639.6	0.0022	0.01	0.0089	0.15	0.39	0.4	FALSE	FALSE	FALSE	FALSE	6.5e-06	0.00048	3.2e-10	3.4e-08	1.3	1	1	0.27	1
gut	I	FBgn0033919	CG8547	36586	31.01	379.45	2.1e-05	0.14	0.00024	0.66	0.72	0.39	FALSE	FALSE	FALSE	FALSE	8.3e-05	0.0023	2e-10	2.5e-08	1.6	1	1	0.96	1
gut	I	FBgn0030520	Pdcd4	32337	24.76	1040.92	0.0083	0.0029	0.026	0.06	1.6	0.64	FALSE	FALSE	FALSE	FALSE	0.91	0.96	0.012	0.03	1.5	0.37	1	0.28	1
gut	I	FBgn0035611	CG13285	38623	24.51	353.94	1.3e-05	0.18	0.00017	0.72	2.5	0.23	FALSE	FALSE	FALSE	FALSE	0.0035	0.027	0.25	0.36	0.51	0.99	1	0.48	1
gut	I	FBgn0010422	TfIIS	34883	29.53	211.76	0.00019	0.057	0.0013	0.42	0.6	0.28	FALSE	FALSE	TRUE	FALSE	0.63	0.79	0.00086	0.0035	0.52	0.092	0.67	0.47	1
gut	I	FBgn0086691	UK114	34897	33.13	760.3	4.4e-07	0.42	1.2e-05	0.9	0.71	0.18	FALSE	FALSE	TRUE	FALSE	0.47	0.66	3.1e-06	3.6e-05	0.62	0.038	0.52	0.78	1
gut	I	FBgn0063491	GstE9	246581	30.35	3931.14	0.00011	0.076	0.00087	0.5	0.72	0.36	FALSE	TRUE	FALSE	FALSE	1e-05	0.00064	0.0018	0.0064	-0.54	1	1	0.13	1
gut	I	FBgn0031479	Prx6005	33493	30.02	216.44	8.4e-05	0.088	0.00072	0.54	0.46	0.29	FALSE	FALSE	TRUE	FALSE	0.5	0.69	1.1e-05	0.0001	0.55	0.033	0.48	0.079	1
gut	I	FBgn0262126	Sec24CD	33409	31.33	2055.28	8.9e-08	0.54	4.2e-06	0.94	0.67	0.11	FALSE	FALSE	FALSE	FALSE	0.023	0.098	7.1e-05	0.00045	0.4	0.28	0.93	0.33	1
gut	I	FBgn0014002	Pdi	39651	35.83	15392.3	0.0007	0.029	0.0036	0.28	0.21	0.25	FALSE	FALSE	TRUE	FALSE	0.057	0.18	0.24	0.35	0.063	0.0091	0.39	0.17	1
gut	I	FBgn0015568	alpha-Est1	40909	25.89	2313.19	0.0033	0.0097	0.013	0.14	0.68	0.47	FALSE	FALSE	FALSE	FALSE	0.0044	0.031	0.23	0.34	-0.25	0.97	1	0.96	1
gut	I	FBgn0034753	CG2852	37591	33.18	3099.15	4.4e-07	0.46	1.2e-05	0.92	0.5	0.11	FALSE	FALSE	TRUE	FALSE	0.48	0.67	7.6e-08	1.9e-06	0.56	0.0038	0.37	0.67	1
gut	I	FBgn0029885	CG3224	31600	26.62	433.18	0.0094	0.0038	0.029	0.072	0.45	0.41	FALSE	FALSE	FALSE	FALSE	0.033	0.12	8.5e-06	8.1e-05	0.95	0.77	1	0.38	1
gut	I	FBgn0037891	CG5214	41360	33.39	2790.51	2.9e-08	0.66	1.8e-06	0.96	0.8	0.07	FALSE	FALSE	FALSE	FALSE	0.011	0.06	4.7e-05	0.00032	0.46	0.51	1	0.79	1
gut	I	FBgn0004169	up	32314	35.28	1967.45	8e-05	0.12	0.00069	0.61	0.37	0.42	FALSE	FALSE	TRUE	FALSE	0.63	0.78	1.8e-05	0.00015	0.42	0.0061	0.39	0.66	1
gut	I	FBgn0035283	CG12024	38243	27.47	163.21	8.9e-05	0.12	0.00075	0.61	0.79	0.3	FALSE	FALSE	FALSE	FALSE	0.64	0.79	2.2e-05	0.00017	0.9	0.15	0.79	0.47	1
gut	I	FBgn0034879	Rrp4	37731	26.63	334.97	1.2e-05	0.25	0.00016	0.8	1.2	0.19	FALSE	FALSE	FALSE	FALSE	0.021	0.092	0.027	0.059	0.48	0.9	1	0.19	1
gut	I	FBgn0038257	smp-30	41786	33.96	10944.8	3e-05	0.18	0.00032	0.73	0.64	0.3	FALSE	FALSE	TRUE	FALSE	0.75	0.86	7.9e-05	0.00049	0.59	0.047	0.55	0.19	1
gut	I	FBgn0010482	l(2)01289	46017	29.9	619.86	8.3e-06	0.28	0.00012	0.82	0.61	0.28	FALSE	FALSE	FALSE	FALSE	0.2	0.39	2.4e-07	4.7e-06	0.8	0.14	0.78	0.46	1
gut	I	FBgn0002789	Mp20	36468	34.71	1358.36	7.1e-05	0.15	0.00063	0.67	0.49	0.35	FALSE	FALSE	FALSE	FALSE	0.06	0.18	2.8e-07	5.4e-06	0.76	0.3	0.95	0.87	1
gut	I	FBgn0040064	yip2	34313	35.39	3483.71	4e-05	0.18	0.00041	0.72	0.39	0.15	FALSE	FALSE	TRUE	FALSE	0.22	0.41	0.0021	0.0073	0.26	0.028	0.46	0.28	1
gut	I	FBgn0086447	l(2)37Cg	35196	24.47	52.35	1.8e-05	0.24	0.00021	0.79	2	0.3	FALSE	TRUE	FALSE	FALSE	0.0019	0.017	0.53	0.64	0.22	1	1	0.61	1
gut	I	FBgn0028342	ATPsyndelta	31950	34.93	1900.9	1.4e-07	0.61	5.8e-06	0.95	0.94	0.085	FALSE	FALSE	FALSE	FALSE	0.025	0.1	0.00011	0.00067	0.55	0.61	1	0.3	1
gut	I	FBgn0038349	AOX3	41896	33.5	8908.47	9.4e-08	0.64	4.3e-06	0.96	0.73	0.056	FALSE	FALSE	FALSE	FALSE	0.045	0.15	2.9e-05	0.00022	0.47	0.25	0.91	0.032	0.84
gut	I	FBgn0010620	CG10939	44155	29.76	328.25	0.00083	0.048	0.0042	0.38	0.45	0.31	FALSE	FALSE	FALSE	FALSE	0.4	0.6	6e-05	0.0004	0.58	0.11	0.71	0.88	1
gut	I	FBgn0031950	Herp	34065	24.89	1851.28	8.2e-05	0.15	0.0007	0.67	1.8	0.14	FALSE	FALSE	FALSE	FALSE	0.13	0.3	0.011	0.029	1	0.82	1	0.63	1
gut	I	FBgn0264078	Flo2	32425	29.93	399.25	5.4e-06	0.37	8.6e-05	0.88	0.77	0.18	FALSE	FALSE	FALSE	FALSE	0.29	0.49	3.1e-07	5.8e-06	0.96	0.19	0.84	0.38	1
gut	I	FBgn0003274	RpLP2	36855	34.84	34250.8	2.5e-05	0.25	0.00028	0.8	0.67	0.22	FALSE	FALSE	FALSE	FALSE	0.31	0.51	1.4e-06	1.9e-05	0.85	0.17	0.82	0.94	1
gut	I	FBgn0032010	CG8086	34131	27.47	104.16	0.00014	0.14	0.001	0.64	1.6	0.4	FALSE	FALSE	FALSE	FALSE	0.0097	0.055	0.47	0.59	0.24	0.98	1	0.84	1
gut	I	FBgn0003149	Prm	39002	36.71	2107.28	3.4e-06	0.41	6.1e-05	0.9	0.36	0.22	FALSE	FALSE	TRUE	FALSE	0.17	0.35	0.00023	0.0012	0.25	0.0042	0.38	0.87	1
gut	I	FBgn0000579	Eno	33351	35.43	7225.04	0.014	0.0059	0.04	0.1	0.16	0.34	FALSE	FALSE	TRUE	FALSE	0.81	0.89	0.0067	0.019	0.19	0.00079	0.31	0.22	1
gut	I	FBgn0011289	TfIIA-L	43284	25.98	1367.36	0.00051	0.079	0.0029	0.51	0.77	0.19	FALSE	FALSE	FALSE	FALSE	0.96	0.98	0.00044	0.0021	0.78	0.11	0.71	0.43	1
gut	I	FBgn0000253	Cam	36329	33.93	4068.43	2e-09	0.88	2.4e-07	0.99	1.4	0.033	FALSE	FALSE	FALSE	FALSE	0.00078	0.0097	4.1e-05	0.00029	0.67	0.97	1	0.23	1
gut	I	FBgn0030336	CG1578	32135	25.8	843.33	0.0092	0.01	0.028	0.15	1.1	0.46	FALSE	TRUE	FALSE	FALSE	0.00069	0.0091	0.01	0.027	-1	1	1	0.87	1
gut	I	FBgn0031285	CG3662	33260	26.52	6373.96	2.6e-06	0.45	5.2e-05	0.92	1.2	0.07	FALSE	FALSE	FALSE	FALSE	0.0022	0.019	0.11	0.18	0.3	0.98	1	0.85	1
gut	I	FBgn0032456	MRP	34686	32.35	7798.61	0.00012	0.16	0.00092	0.69	0.4	0.26	FALSE	FALSE	FALSE	FALSE	0.07	0.2	0.043	0.087	0.18	0.16	0.79	0.99	1
gut	I	FBgn0026373	RpII33	34796	28.1	165.63	0.0031	0.028	0.012	0.28	0.53	0.35	FALSE	FALSE	FALSE	FALSE	0.3	0.5	0.071	0.13	0.3	0.32	0.97	0.066	1
gut	I	FBgn0030616	RpL37a	32446	31.06	13314.7	0.0052	0.019	0.018	0.22	0.4	0.35	FALSE	FALSE	FALSE	FALSE	0.00071	0.0092	0.019	0.044	-0.32	0.98	1	0.31	1
gut	I	FBgn0033272	RagC-D	35793	27.66	536.26	2.2e-06	0.49	4.5e-05	0.92	0.89	0.094	FALSE	FALSE	TRUE	FALSE	0.92	0.96	1.7e-06	2.2e-05	0.9	0.047	0.55	0.042	0.89
gut	I	FBgn0033214	CG1941	35718	29.7	1165.87	1.2e-06	0.54	2.7e-05	0.94	0.5	0.12	FALSE	FALSE	FALSE	FALSE	4.3e-05	0.0015	0.67	0.76	-0.03	0.96	1	0.98	1
gut	I	FBgn0265045	Strn-Mlck		27.04	1026.93	4.5e-05	0.25	0.00044	0.8	1.1	0.31	FALSE	FALSE	FALSE	FALSE	0.63	0.78	1.1e-05	9.9e-05	1.2	0.25	0.91	0.72	1
gut	I	FBgn0013576	mtd	45467	29.6	6312.01	1.5e-05	0.34	0.00018	0.86	0.57	0.19	FALSE	FALSE	FALSE	FALSE	0.0084	0.05	9.2e-09	3.5e-07	0.98	0.69	1	0.74	1
gut	I	FBgn0027493	AdSS	42466	31.73	13154.8	0.0019	0.046	0.008	0.38	0.32	0.24	FALSE	FALSE	FALSE	FALSE	0.18	0.37	0.11	0.19	0.15	0.1	0.71	0.47	1
gut	I	FBgn0052694	CG32694	31933	27.69	65.31	3.2e-06	0.48	5.8e-05	0.92	0.88	0.19	FALSE	FALSE	FALSE	FALSE	0.054	0.17	2e-08	6.5e-07	1.3	0.59	1	0.66	1
gut	I	FBgn0028327	l(1)G0320	326234	31.15	2290.13	2.2e-05	0.31	0.00025	0.84	0.87	0.15	FALSE	FALSE	FALSE	FALSE	0.53	0.71	0.00015	0.00085	0.73	0.18	0.83	0.28	1
gut	I	FBgn0030753	rngo	32616	29.96	872.8	1.3e-06	0.55	2.9e-05	0.94	0.71	0.081	FALSE	FALSE	TRUE	FALSE	0.71	0.84	3.6e-06	4.1e-05	0.66	0.028	0.46	0.4	1
gut	I	FBgn0001145	Gs2	32087	33.76	4444.38	4.6e-06	0.45	7.6e-05	0.92	0.48	0.14	FALSE	TRUE	FALSE	FALSE	8e-06	0.00054	0.034	0.072	-0.17	1	1	0.96	1
gut	I	FBgn0035911	CG6638	38979	28.79	533.52	0.018	0.007	0.048	0.11	0.34	0.38	FALSE	FALSE	TRUE	FALSE	0.8	0.89	0.038	0.078	0.29	0.065	0.61	0.69	1
gut	I	FBgn0035244	ABCB7	38193	32.22	3822.77	2.2e-05	0.32	0.00025	0.85	0.43	0.11	FALSE	FALSE	FALSE	FALSE	0.08	0.22	0.0064	0.018	0.23	0.1	0.71	0.17	1
gut	I	FBgn0038774	CG5023	42400	33.6	148.13	0.00057	0.1	0.0031	0.57	0.37	0.44	FALSE	FALSE	FALSE	FALSE	1.7e-06	0.00019	4.6e-11	1.4e-08	1.3	1	1	0.84	1
gut	I	FBgn0038115	CG7966	41610	28.96	693.07	1e-05	0.4	0.00014	0.9	0.56	0.14	FALSE	FALSE	FALSE	FALSE	0.003	0.025	0.23	0.34	0.11	0.79	1	0.99	1
gut	I	FBgn0020385	pug	41279	30.16	1495.79	0.01	0.014	0.031	0.18	0.26	0.43	FALSE	FALSE	TRUE	FALSE	0.67	0.81	0.037	0.077	0.2	0.019	0.43	0.54	1
gut	I	FBgn0035964	Dhpr	39050	31.4	246	0.00071	0.095	0.0037	0.56	0.66	0.25	FALSE	FALSE	FALSE	FALSE	0.22	0.42	0.033	0.071	0.37	0.41	1	0.35	1
gut	I	FBgn0035360	CG1246	38330	29.46	4028.24	1.8e-05	0.36	0.00022	0.87	0.77	0.14	FALSE	FALSE	FALSE	FALSE	0.053	0.17	8e-08	2e-06	1.2	0.6	1	0.41	1
gut	I	FBgn0001091	Gapdh1	35728	31.8	5372.66	0.0017	0.059	0.0074	0.43	0.66	0.19	FALSE	FALSE	FALSE	FALSE	0.24	0.43	0.065	0.12	0.35	0.45	1	0.96	1
gut	I	FBgn0032840	sNPF	35286	23.64	30	0.0042	0.034	0.015	0.31	1.1	0.52	FALSE	FALSE	FALSE	FALSE	0.07	0.2	1.2e-05	0.00011	1.9	0.87	1	0.71
gut	I	FBgn0025592	Gk1	43913	29.84	3414.57	2.3e-06	0.55	4.6e-05	0.94	0.63	0.074	FALSE	FALSE	FALSE	FALSE	0.15	0.33	0.00018	0.00098	0.43	0.14	0.78	0.25	1
gut	I	FBgn0004363	porin	34500	36.03	9311.39	2.6e-06	0.54	5.2e-05	0.94	0.42	0.1	FALSE	FALSE	FALSE	FALSE	0.0012	0.013	0.2	0.3	0.084	0.5	1	0.99	1
gut	I	FBgn0051548	CG31548	318794	31.5	1176.82	6.3e-05	0.27	0.00058	0.81	0.36	0.17	FALSE	FALSE	TRUE	FALSE	0.4	0.59	0.00091	0.0037	0.27	0.0088	0.39	0.95	1
gut	I	FBgn0038294	Mf	41824	35.64	1308.68	0.00011	0.24	0.00085	0.79	0.38	0.3	FALSE	FALSE	TRUE	FALSE	0.73	0.85	0.00031	0.0015	0.35	0.0064	0.39	0.45	1
gut	I	FBgn0002773	Mlc2	43587	34.74	4084.8	3.5e-06	0.54	6.1e-05	0.94	0.66	0.14	FALSE	FALSE	FALSE	FALSE	0.013	0.067	4.8e-09	2.2e-07	1.1	0.63	1	0.52	1
gut	I	FBgn0067783	DPCoAC	42429	27.5	541.03	2.2e-05	0.38	0.00025	0.88	0.78	0.15	FALSE	FALSE	TRUE	FALSE	0.94	0.97	2.8e-05	0.00021	0.76	0.054	0.58	0.67	1
gut	I	FBgn0264294	Cyt-b5	35688	32.71	6433.7	1.3e-06	0.63	2.9e-05	0.96	0.54	0.08	FALSE	FALSE	FALSE	FALSE	0.0015	0.015	0.082	0.15	0.14	0.71	1	0.92	1
gut	I	FBgn0085446	CG34417	31591	31.86	3243.72	6.1e-05	0.3	0.00056	0.83	0.41	0.26	FALSE	FALSE	FALSE	FALSE	0.0036	0.028	1.1e-08	4.1e-07	0.78	0.6	1	0.86	1
gut	I	FBgn0030060	CG2004	31809	31.24	1532.43	0.0087	0.023	0.027	0.25	0.28	0.43	FALSE	FALSE	FALSE	FALSE	0.0098	0.056	0.27	0.38	-0.11	0.63	1	0.062	1
gut	I	FBgn0051897	CG31897	319011	26.24	3.5	5e-05	0.33	0.00049		5.1	0.22	FALSE	FALSE	FALSE	FALSE	0.019	0.086	0.11	0.19	1.6	0.98	1	0.67
gut	I	FBgn0030834	CG8675	32716	25.16	529.55	9.2e-05	0.28	0.00077	0.82	0.66	0.16	FALSE	FALSE	TRUE	FALSE	0.79	0.88	4e-05	0.00028	0.71	0.069	0.62	0.23	1
gut	I	FBgn0025117	und	34294	31.41	3337	0.0064	0.034	0.021	0.31	0.26	0.24	FALSE	FALSE	TRUE	FALSE	0.4	0.59	0.00043	0.002	0.36	0.029	0.47	0.18	1
gut	I	FBgn0028490	CG31705	34577	24.74	322.08	0.028	0.0088	0.068	0.14	2.2	0.63	FALSE	FALSE	FALSE	FALSE	0.11	0.27	0.00015	0.00086	4.4	0.91	1	0.91	1
gut	I	FBgn0262870	axo	43923	29.66	2760.83	4.9e-05	0.36	0.00047	0.87	0.83	0.19	FALSE	FALSE	FALSE	FALSE	0.51	0.69	7e-06	7e-05	0.98	0.2	0.85	0.89	1
gut	I	FBgn0032706	Irk3	35131	26.86	2077.87	0.0063	0.039	0.021	0.34	0.51	0.36	FALSE	FALSE	FALSE	FALSE	0.16	0.34	6.9e-05	0.00044	0.85	0.5	1	0.53	1
gut	I	FBgn0001218	Hsc70-3	32133	35.22	9504.88	0.00018	0.25	0.0013	0.8	0.3	0.22	FALSE	FALSE	TRUE	FALSE	0.67	0.81	0.00068	0.0029	0.26	0.002	0.31	0.33	1
gut	I	FBgn0023537	CG17896	30995	35.05	10814.2	0.0081	0.033	0.026	0.31	0.26	0.3	FALSE	FALSE	TRUE	FALSE	0.54	0.72	0.05	0.098	0.18	0.022	0.44	0.75	1
gut	I	FBgn0036551	CG17029	39740	30.14	2732.73	0.001	0.12	0.005	0.62	0.46	0.27	FALSE	FALSE	FALSE	FALSE	0.075	0.21	0.23	0.34	0.14	0.43	1	0.63	1
gut	I	FBgn0021768	nudC	39879	29.98	416.71	3.9e-05	0.4	0.0004	0.9	0.71	0.15	FALSE	FALSE	TRUE	FALSE	0.7	0.83	0.00012	0.00072	0.64	0.081	0.65	0.61	1
gut	I	FBgn0003356	Jon99Cii	43543	30.63	126019	6.5e-05	0.35	0.00059	0.87	0.88	0.18	FALSE	TRUE	FALSE	FALSE	1.8e-06	0.0002	0.00021	0.0011	-0.79	1	1	0.83	1
gut	I	FBgn0036806	Cyp12c1	40037	30.77	1243.2	0.025	0.012	0.063	0.17	0.23	0.36	FALSE	FALSE	FALSE	FALSE	0.007	0.044	0.078	0.14	-0.18	0.69	1	0.3	1
gut	I	FBgn0013954	FK506-bp2	37214	33.95	2080.12	0.026	0.012	0.065	0.17	0.27	0.21	FALSE	FALSE	TRUE	FALSE	0.68	0.82	0.0076	0.021	0.33	0.047	0.55	0.081	1
gut	I	FBgn0030306	Spase25	32095	30.71	766.46	1.8e-05	0.48	0.00021	0.92	0.86	0.11	FALSE	TRUE	FALSE	FALSE	0.0003	0.0053	0.6	0.7	-0.078	0.99	1	0.98	1
gut	I	FBgn0037517	CG10086	40920	27.33	1928.79	0.0024	0.087	0.0095	0.53	0.59	0.3	FALSE	FALSE	FALSE	FALSE	0.22	0.41	0.096	0.17	0.29	0.43	1	0.58	1
gut	I	FBgn0010438	mtSSB	41968	30.37	199.02	2.2e-05	0.46	0.00025	0.92	0.69	0.14	FALSE	FALSE	FALSE	FALSE	0.0024	0.021	0.49	0.6	0.086	0.93	1	0.17	1
gut	I	FBgn0031818	CG9536	33904	25.26	802.45	0.032	0.01	0.075	0.15	0.84	0.28	FALSE	FALSE	FALSE	FALSE	0.013	0.066	7.2e-06	7.1e-05	2.3	0.98	1	0.066	1
gut	I	FBgn0005671	Vha55	41550	37.29	19389.5	3.3e-05	0.43	0.00035	0.91	0.4	0.16	FALSE	FALSE	FALSE	FALSE	0.00064	0.0086	0.74	0.81	-0.024	0.78	1	0.6	1
gut	I	FBgn0029857	wuho	31566	29.11	401.29	0.00015	0.3	0.0011	0.83	0.89	0.14	FALSE	FALSE	FALSE	FALSE	0.035	0.13	0.13	0.22	0.29	0.83	1	0.038	0.87
gut	I	FBgn0261618	larp	53567	30.2	3610.75	5.9e-05	0.39	0.00055	0.89	0.48	0.2	FALSE	FALSE	FALSE	FALSE	0.035	0.13	1.3e-07	2.9e-06	0.78	0.37	1	0.68	1
gut	I	FBgn0023509	mip130	31153	23.84	455.27	2.6e-05	0.47	0.00029	0.92	2.1	0.15	FALSE	FALSE	FALSE	FALSE	0.58	0.75	0.00014	0.00079	1.8	0.46	1	0.47	1
gut	I	FBgn0052311	zormin	2769001	31.08	1106.01	0.0013	0.14	0.006	0.65	0.32	0.4	FALSE	FALSE	FALSE	FALSE	2.5e-05	0.0013	8.3e-10	6.8e-08	0.98	0.99	1	0.88	1
gut	I	FBgn0027567	CG8108	39161	27.71	930.97	0.02	0.021	0.053	0.23	0.31	0.38	FALSE	FALSE	FALSE	FALSE	0.057	0.18	0.75	0.82	-0.04	0.51	1	0.76	1
gut	I	FBgn0033246	ACC	35761	31.31	9860.5	0.0059	0.06	0.02	0.43	0.23	0.37	FALSE	FALSE	FALSE	FALSE	0.0037	0.028	3.6e-07	6.4e-06	0.57	0.51	1	0.15	1
gut	I	FBgn0033043	Or42b	35516	24.53	0.56	5.1e-07	0.79	1.4e-05		2.8	0.02	FALSE	FALSE	FALSE	FALSE	0.16	0.35	2.8e-05	0.00021	2	0.78	1	0.4
gut	I	FBgn0027091	CysRS	36784	30.78	950.23	6.9e-05	0.4	0.00062	0.9	0.42	0.081	FALSE	FALSE	FALSE	FALSE	0.027	0.11	0.096	0.17	0.14	0.3	0.95	0.2	1
gut	I	FBgn0033349	CG8243	35890	28.53	621	0.00019	0.31	0.0013	0.84	0.53	0.11	FALSE	FALSE	FALSE	FALSE	0.32	0.52	9.4e-06	8.8e-05	0.69	0.14	0.78	0.86	1
gut	I	FBgn0030362	regucalcin	32165	32.84	1480.86	2.9e-05	0.49	0.00031	0.92	0.4	0.094	FALSE	FALSE	TRUE	FALSE	0.24	0.44	0.0011	0.0045	0.28	0.021	0.43	0.38	1
gut	I	FBgn0025742	mtm	33845	27.4	729.65	0.0017	0.13	0.0074	0.64	0.69	0.18	FALSE	FALSE	FALSE	FALSE	0.71	0.84	0.0055	0.016	0.59	0.19	0.84	0.062	1
gut	I	FBgn0036550	CG17026	39739	28.93	255.34	0.00062	0.22	0.0033	0.77	0.63	0.3	FALSE	FALSE	FALSE	FALSE	0.059	0.18	0.21	0.32	0.2	0.67	1	0.78	1
gut	I	FBgn0033448	hebe	36011	32.57	6755.72	0.00013	0.36	0.001	0.87	0.54	0.12	FALSE	FALSE	FALSE	FALSE	0.018	0.083	1.1e-07	2.7e-06	0.95	0.67	1	0.38	1
gut	I	FBgn0051104	CG31104	43054	32.63	2553.17	0.00045	0.26	0.0026	0.8	0.51	0.26	FALSE	FALSE	FALSE	FALSE	0.061	0.18	0.16	0.26	0.17	0.49	1	0.4	1
gut	I	FBgn0051116	ClC-a	41428	27.7	1909.57	0.00013	0.38	0.001	0.88	0.54	0.14	FALSE	FALSE	FALSE	FALSE	0.00081	0.01	4.6e-09	2.1e-07	1.2	0.96	1	0.77	1
gut	I	FBgn0011722	Tig	33896	31.48	298.42	0.0093	0.055	0.029	0.42	0.28	0.49	FALSE	FALSE	FALSE	FALSE	0.0015	0.015	1.9e-07	4e-06	0.8	0.89	1	0.94	1
gut	I	FBgn0028872	CG18095	34823	27.86	697.33	0.00045	0.27	0.0026	0.81	0.8	0.28	FALSE	FALSE	FALSE	FALSE	0.068	0.2	1.6e-06	2.1e-05	1.3	0.74	1	0.33	1
gut	I	FBgn0036015	CG3088	39115	24.25	1.07	7.5e-05	0.45	0.00065		1.7	0.11	FALSE	FALSE	FALSE	FALSE	0.26	0.46	2.7e-06	3.3e-05	2.2	0.66	1	0.45
gut	I	FBgn0030800	Nprl2	32677	28.84	252.02	0.00016	0.37	0.0012	0.88	1.3	0.12	FALSE	FALSE	FALSE	FALSE	0.0018	0.017	0.69	0.77	-0.11	0.99	1	0.28	1
gut	I	FBgn0259143	CG42258	32196	29.37	673.29	1.3e-05	0.61	0.00017	0.95	0.99	0.095	FALSE	FALSE	FALSE	FALSE	0.45	0.64	1.6e-06	2.1e-05	1.2	0.26	0.92	0.27	1
gut	I	FBgn0038804	CG10877	42432	33.16	2275.82	0.00038	0.29	0.0023	0.83	0.57	0.17	FALSE	FALSE	FALSE	FALSE	0.067	0.2	0.12	0.21	0.21	0.54	1	0.64	1
gut	I	FBgn0262508	CG43078	38981	25.94	4652.94	0.028	0.023	0.067	0.25	0.49	0.54	FALSE	FALSE	FALSE	FALSE	0.00023	0.0044	5.9e-08	1.5e-06	1.8	1	1	0.38	1
gut	I	FBgn0035665	Jon65Aiii	38683	30.03	111060	7.7e-07	0.82	1.9e-05	0.99	1.4	0.042	FALSE	FALSE	FALSE	FALSE	0.0062	0.041	0.0071	0.02	0.58	0.96	1	0.4	1
gut	I	FBgn0004856	Bx42	31840	26.52	1079.37	0.00018	0.37	0.0013	0.88	0.45	0.078	FALSE	FALSE	FALSE	FALSE	0.14	0.32	2.1e-06	2.6e-05	0.66	0.17	0.81	0.095	1
gut	I	FBgn0011715	Snr1	40657	26.58	309.02	6e-05	0.48	0.00055	0.92	2.3	0.096	FALSE	FALSE	FALSE	FALSE	0.05	0.16	0.037	0.077	0.99	0.93	1	0.21	1
gut	I	FBgn0033679	CG8888	36293	29.63	213.17	0.00014	0.4	0.001	0.9	0.55	0.22	FALSE	FALSE	TRUE	FALSE	0.65	0.8	0.00056	0.0025	0.48	0.058	0.59	0.89	1
gut	I	FBgn0010417	Taf6	40134	25.83	388.04	0.0014	0.18	0.0064	0.72	0.53	0.17	FALSE	FALSE	TRUE	FALSE	0.75	0.86	0.00053	0.0024	0.59	0.089	0.67	0.22	1
gut	I	FBgn0030503	Tango2	32319	29.04	1488.47	0.026	0.026	0.064	0.27	0.33	0.38	FALSE	FALSE	FALSE	FALSE	0.00035	0.0059	0.0014	0.0051	-0.52	0.99	1	0.84	1
gut	I	FBgn0027109	NPF	42018	26.74	287.96	3.4e-06	0.73	6.1e-05	0.97	0.93	0.046	FALSE	FALSE	FALSE	FALSE	0.49	0.67	2.6e-05	0.0002	0.79	0.16	0.81	0.21	1
gut	I	FBgn0035670	CG10472	38688	30.92	90338.6	9.2e-06	0.66	0.00013	0.97	0.74	0.079	FALSE	FALSE	FALSE	FALSE	0.022	0.095	0.019	0.044	0.31	0.69	1	0.7	1
gut	I	FBgn0020236	ATPCL	36760	26.63	3705.57	0.00062	0.26	0.0033	0.81	0.91	0.18	FALSE	FALSE	FALSE	FALSE	0.32	0.52	0.015	0.036	0.59	0.47	1	0.14	1
gut	I	FBgn0034583	CG10527	37393	30.51	556.07	4.8e-06	0.72	7.8e-05	0.97	0.74	0.08	FALSE	FALSE	FALSE	FALSE	0.053	0.17	2.7e-08	8.3e-07	1.1	0.48	1	0.68	1
gut	I	FBgn0015288	RpL22	31022	33.67	12632.9	0.00091	0.23	0.0045	0.78	0.42	0.22	FALSE	FALSE	FALSE	FALSE	0.00072	0.0093	0.089	0.16	-0.19	0.96	1	0.21	1
gut	I	FBgn0034258	eIF3c	37005	31.62	9664.18	4.1e-05	0.54	0.00041	0.94	0.41	0.063	FALSE	FALSE	TRUE	FALSE	0.14	0.32	0.0046	0.014	0.25	0.059	0.6	0.47	1
gut	I	FBgn0034923	Upf3	37792	23.33	131.55	0.0018	0.18	0.0075	0.72	0.96	0.25	FALSE	FALSE	FALSE	FALSE	0.16	0.34	0.13	0.22	0.41	0.71	1	0.66	1
gut	I	FBgn0033191	CG1598	35690	27.5	784.27	5.5e-05	0.51	0.00052	0.93	0.69	0.082	FALSE	FALSE	FALSE	FALSE	0.079	0.22	0.017	0.041	0.35	0.51	1	0.08	1
gut	I	FBgn0033814	CG4670	36464	27.02	2513.18	0.00023	0.37	0.0015	0.88	0.86	0.11	FALSE	FALSE	FALSE	FALSE	0.016	0.078	0.41	0.52	0.16	0.9	1	0.11	1
gut	I	FBgn0042083	Mccc2	59261	30.44	933.7	0.00087	0.24	0.0044	0.79	0.37	0.17	FALSE	FALSE	TRUE	FALSE	0.94	0.97	0.00069	0.003	0.38	0.01	0.39	0.81	1
gut	I	FBgn0030612	CG5599	32441	29.79	512.48	0.011	0.063	0.032	0.45	0.44	0.33	FALSE	FALSE	FALSE	FALSE	0.084	0.22	3.9e-05	0.00028	0.84	0.61	1	0.47	1
gut	I	FBgn0051102	CG31102	326118	28.04	1266.37	0.019	0.041	0.05	0.36	0.62	0.31	FALSE	FALSE	FALSE	FALSE	0.85	0.92	0.011	0.028	0.68	0.21	0.87	0.75	1
gut	I	FBgn0004028	wupA	32794	23.64	1589.6	0.00017	0.41	0.0012	0.9	1.8	0.18	FALSE	FALSE	FALSE	FALSE	0.065	0.19	0.068	0.13	0.74	0.9	1	0.35	1
gut	I	FBgn0026250	eIF1A	44260	30.04	2435.97	0.021	0.039	0.054	0.34	0.28	0.24	FALSE	FALSE	TRUE	FALSE	0.75	0.86	0.052	0.1	0.23	0.041	0.53	0.8	1
gut	I	FBgn0036754	CG5589	39979	27.45	66.28	0.014	0.055	0.039	0.42	2.2	0.44	FALSE	FALSE	FALSE	FALSE	0.15	0.33	0.57	0.67	0.47	0.88	1	0.47	1
gut	I	FBgn0030731	Mfe2	32582	35.18	11931.6	4.7e-07	0.87	1.3e-05	0.99	0.49	0.028	FALSE	FALSE	TRUE	FALSE	0.033	0.12	0.00034	0.0017	0.28	0.077	0.64	0.92	1
gut	I	FBgn0032293	Dpy-30L1	34480	28.49	33.49	0.01	0.07	0.031	0.48	0.83	0.42	FALSE	FALSE	FALSE	FALSE	0.33	0.52	0.17	0.26	0.41	0.57	1	0.42
gut	I	FBgn0265574	Cdc5	38062	27.6	501.95	0.017	0.048	0.046	0.39	0.3	0.32	FALSE	FALSE	FALSE	FALSE	0.19	0.38	0.00027	0.0014	0.52	0.23	0.89	0.23	1
gut	I	FBgn0035203	CG9149	38147	31.01	483.42	1.3e-06	0.83	2.9e-05	0.99	0.67	0.033	FALSE	FALSE	TRUE	FALSE	0.86	0.92	2.1e-06	2.7e-05	0.65	0.014	0.39	0.38	1
gut	I	FBgn0010100	Acon	44149	36.78	15795	0.001	0.25	0.0049	0.8	0.25	0.18	FALSE	FALSE	FALSE	FALSE	0.004	0.029	0.47	0.58	-0.047	0.3	0.95	0.44	1
gut	I	FBgn0038269	Rrp6	41798	25.79	335.26	0.001	0.26	0.0048	0.8	0.87	0.2	FALSE	FALSE	FALSE	FALSE	0.77	0.87	0.0025	0.0086	0.77	0.22	0.87	0.47	1
gut	I	FBgn0003308	ry	41605	30.67	2609.17	0.0013	0.24	0.0058	0.79	0.47	0.19	FALSE	FALSE	FALSE	FALSE	0.0014	0.014	0.14	0.23	-0.19	0.96	1	0.86	1
gut	I	FBgn0033810	CG4646	36459	28.04	185.39	0.00022	0.42	0.0015	0.9	0.55	0.18	FALSE	FALSE	FALSE	FALSE	0.14	0.32	0.024	0.055	0.29	0.31	0.97	0.22	1
gut	I	FBgn0038681	Cyp12a4	42294	34.47	8463.35	2.1e-09	0.98	2.4e-07	1	1	0.0028	FALSE	FALSE	FALSE	FALSE	0.0015	0.015	1.8e-05	0.00015	0.55	0.88	1	0.86	1
gut	I	FBgn0040759	CG13177	5740215	27.46	22.04	0.0004	0.36	0.0024	0.87	0.75	0.25	FALSE	FALSE	FALSE	FALSE	0.0045	0.032	5.5e-08	1.5e-06	1.5	0.96	1	0.72
gut	I	FBgn0031637	mxt	33686	27.72	2245.15	0.0052	0.13	0.018	0.63	0.65	0.27	FALSE	FALSE	FALSE	FALSE	0.36	0.56	0.079	0.14	0.38	0.41	1	0.72	1
gut	I	FBgn0260003	Dys	42327	29.6	4870.97	9.3e-06	0.72	0.00013	0.97	0.6	0.084	FALSE	FALSE	FALSE	FALSE	0.27	0.46	0.00028	0.0014	0.44	0.1	0.71	0.54	1
gut	I	FBgn0052603	CG32603	318109	23.9	0.18	0.0014	0.24	0.0062		2.3	0.068	FALSE	TRUE	FALSE	FALSE	0.0017	0.016	0.17	0.26	-0.87	1	1	0.54
gut	I	FBgn0039407	CG14544	43170	27.44	39.95	0.00064	0.32	0.0034	0.85	0.85	0.25	FALSE	FALSE	FALSE	FALSE	0.02	0.087	0.62	0.72	0.1	0.91	1	0.039	0.87
gut	I	FBgn0031453	Bacc	33462	32.63	1470.6	0.0085	0.098	0.026	0.56	0.29	0.29	FALSE	FALSE	TRUE	FALSE	0.48	0.67	0.00089	0.0037	0.39	0.048	0.55	0.44	1
gut	I	FBgn0261995	CG42813	43276	30.56	2271.37	0.00044	0.37	0.0026	0.88	0.47	0.14	FALSE	FALSE	TRUE	FALSE	0.69	0.82	0.0016	0.0057	0.41	0.045	0.55	0.43	1
gut	I	FBgn0026566	CG1307	40814	28.46	494.08	3.3e-05	0.63	0.00035	0.96	0.84	0.07	FALSE	FALSE	FALSE	FALSE	0.034	0.13	0.036	0.076	0.35	0.76	1	0.13	1
gut	I	FBgn0010774	Ref1	44029	31.15	743.96	0.0059	0.13	0.02	0.63	0.49	0.14	FALSE	FALSE	FALSE	FALSE	0.086	0.23	2.2e-05	0.00017	0.89	0.6	1	0.93	1
gut	I	FBgn0028622	qsm	47065	27.37	116.62	4.3e-05	0.61	0.00043	0.95	0.73	0.13	FALSE	FALSE	FALSE	FALSE	0.0014	0.014	3.6e-09	1.8e-07	1.5	0.97	1	0.29	1
gut	I	FBgn0013733	shot	36542	33.71	33618.8	7.2e-06	0.76	0.00011	0.98	0.36	0.073	FALSE	FALSE	FALSE	FALSE	0.00059	0.0082	5.1e-10	4.5e-08	0.7	0.49	1	0.91	1
gut	I	FBgn0032889	CG9331	35347	34.82	4357.47	0.025	0.046	0.063	0.38	0.24	0.31	FALSE	FALSE	FALSE	FALSE	0.0028	0.023	0.024	0.054	-0.24	0.84	1	0.042	0.88
gut	I	FBgn0037687	CG8132	41121	30.58	871.06	5.4e-05	0.6	0.00051	0.95	0.47	0.094	FALSE	FALSE	TRUE	FALSE	0.75	0.86	2.1e-05	0.00017	0.51	0.014	0.39	0.85	1
gut	I	FBgn0040349	CG3699	31046	34.26	5899.22	0.0048	0.15	0.017	0.67	0.26	0.31	FALSE	FALSE	TRUE	FALSE	0.29	0.49	0.00016	0.00089	0.38	0.035	0.5	0.17	1
gut	I	FBgn0037108	Alg11	40402	26.36	1170.02	0.0059	0.14	0.02	0.65	0.6	0.19	FALSE	FALSE	FALSE	FALSE	0.59	0.76	0.03	0.066	0.45	0.25	0.9	0.022	0.74
gut	I	FBgn0038678	mRpL55	42290	28.46	53.02	0.0017	0.25	0.0072	0.8	0.64	0.26	FALSE	FALSE	FALSE	FALSE	0.11	0.26	0.21	0.32	0.22	0.62	1	0.18	1
gut	I	FBgn0038805	TFAM	42433	30.9	386	0.00042	0.4	0.0025	0.9	0.42	0.11	FALSE	FALSE	FALSE	FALSE	0.079	0.22	0.11	0.19	0.16	0.28	0.93	0.18	1
gut	I	FBgn0031629	Clect27	33678	28.21	40.18	3.8e-05	0.65	0.00039	0.96	0.79	0.12	FALSE	FALSE	FALSE	FALSE	0.17	0.35	6.9e-07	1.1e-05	1.1	0.42	1	0.89	1
gut	I	FBgn0003863	alphaTry	48316	30.85	254277	0.00019	0.5	0.0013	0.92	0.83	0.096	FALSE	FALSE	FALSE	FALSE	0.053	0.17	0.096	0.17	0.31	0.76	1	0.085	1
gut	I	FBgn0262617	CG43143	41256	27.51	895.25	0.00011	0.56	0.00085	0.95	0.77	0.15	FALSE	FALSE	FALSE	FALSE	0.22	0.41	2.7e-06	3.3e-05	1	0.39	1	0.75	1
gut	I	FBgn0031260	Spp	33227	29.53	1679.39	0.0017	0.27	0.0073	0.81	0.75	0.14	FALSE	FALSE	FALSE	FALSE	0.016	0.078	0.95	0.97	-0.012	0.92	1	0.13	1
gut	I	FBgn0086450	su(r)	31858	31.85	4446.24	2.8e-07	0.93	8.9e-06	1	0.63	0.014	FALSE	FALSE	FALSE	FALSE	0.0024	0.021	0.0079	0.022	0.24	0.69	1	0.42	1
gut	I	FBgn0002526	LanA	38723	33.33	2160.51	1e-06	0.89	2.4e-05	0.99	0.46	0.026	FALSE	FALSE	FALSE	FALSE	2.3e-06	0.00023	2.2e-12	3e-09	1.1	1	1	0.59	1
gut	I	FBgn0037220	CG14641	40529	24.86	602.16	0.0072	0.14	0.023	0.65	1.3	0.16	FALSE	FALSE	FALSE	FALSE	0.091	0.24	0.62	0.72	0.21	0.88	1	0.022	0.74
gut	I	FBgn0011286	RyR	49090	23.4	650	0.0036	0.21	0.013	0.76	1.7	0.34	FALSE	FALSE	FALSE	FALSE	0.048	0.16	0.73	0.81	0.18	0.94	1	0.9	1
gut	I	FBgn0016685	Nlp	43560	32.23	1046.51	0.00088	0.35	0.0044	0.87	0.33	0.13	FALSE	FALSE	FALSE	FALSE	0.00013	0.003	3e-09	1.6e-07	0.91	0.97	1	0.76	1
gut	I	FBgn0085220	Ufm1	5740715	30.64	152.55	4.1e-06	0.83	6.9e-05	0.99	0.84	0.048	FALSE	FALSE	FALSE	FALSE	0.37	0.57	3.7e-07	6.5e-06	1	0.18	0.82	0.95	1
gut	I	FBgn0038947	Sar1	42615	31.63	2801.29	0.00072	0.39	0.0037	0.89	0.36	0.12	FALSE	FALSE	FALSE	FALSE	0.0023	0.02	0.35	0.47	-0.084	0.79	1	0.39	1
gut	I	FBgn0035838	ldbr	38900	25.44	42.12	0.0034	0.23	0.013	0.78	0.95	0.28	FALSE	FALSE	FALSE	FALSE	0.16	0.34	0.21	0.32	0.36	0.73	1	0.3	1
gut	I	FBgn0037329	POLDIP2	40655	26.93	383.43	0.0054	0.19	0.018	0.73	0.6	0.17	FALSE	FALSE	FALSE	FALSE	0.62	0.77	0.025	0.057	0.47	0.23	0.89	0.14	1
gut	I	FBgn0000283	Cp190	41848	28.47	943.7	0.00044	0.46	0.0026	0.92	0.52	0.11	FALSE	FALSE	FALSE	FALSE	0.49	0.68	5.2e-05	0.00035	0.64	0.11	0.71	0.32	1
gut	I	FBgn0032640	Sgt	35052	31.43	1145.21	0.0013	0.33	0.0061	0.86	0.31	0.11	FALSE	FALSE	FALSE	FALSE	0.00052	0.0076	1.5e-08	5e-07	0.8	0.89	1	0.37	1
gut	I	FBgn0035985	Cpr67B	39081	30.77	499.49	0.00035	0.48	0.0022	0.92	0.8	0.19	FALSE	FALSE	FALSE	FALSE	0.00029	0.0053	3.4e-09	1.8e-07	1.9	1	1	0.54	1
gut	I	FBgn0037684	CG8129	41117	23.56	799.14	0.025	0.071	0.063	0.48	0.73	0.31	FALSE	FALSE	FALSE	FALSE	0.51	0.7	0.0034	0.011	1	0.45	1	0.58	1
gut	I	FBgn0037065	CG12974	40350	28.63	4942.2	0.00023	0.53	0.0015	0.94	0.67	0.079	FALSE	FALSE	FALSE	FALSE	0.015	0.074	1.3e-07	3.1e-06	1.2	0.85	1	0.068	1
gut	I	FBgn0039227	polybromo	42954	23.36	663.22	0.0026	0.28	0.01	0.81	1.2	0.12	FALSE	FALSE	FALSE	FALSE	0.92	0.96	0.0036	0.011	1.1	0.28	0.93	0.68	1
gut	I	FBgn0035111	Dis3l2	38034	26.57	381.31	0.0014	0.35	0.0063	0.87	0.65	0.13	FALSE	FALSE	FALSE	FALSE	0.14	0.32	0.13	0.21	0.27	0.56	1	0.41	1
gut	I	FBgn0031692	TpnC25D	33752	29.56	305	3.7e-06	0.86	6.4e-05	0.99	0.98	0.04	FALSE	FALSE	FALSE	FALSE	0.031	0.12	0.0043	0.013	0.49	0.76	1	0.9	1
gut	I	FBgn0034564	CG9344	37372	28.45	111.55	0.00053	0.46	0.003	0.92	0.58	0.16	FALSE	FALSE	FALSE	FALSE	0.12	0.28	0.075	0.14	0.26	0.46	1	0.51	1
gut	I	FBgn0022709	Adk1	39396	29.8	430.32	0.0045	0.23	0.016	0.78	0.32	0.26	FALSE	FALSE	FALSE	FALSE	0.00093	0.011	6.4e-08	1.6e-06	0.87	0.92	1	0.6	1
gut	I	FBgn0051522	CG31522	40567	28.51	2089.75	0.0005	0.48	0.0028	0.92	0.91	0.17	FALSE	FALSE	FALSE	FALSE	0.029	0.11	0.39	0.5	0.19	0.89	1	0.9	1
gut	I	FBgn0261609	eIF2alpha	32617	32.47	1989.01	0.028	0.075	0.069	0.49	0.21	0.21	FALSE	FALSE	FALSE	FALSE	0.11	0.28	0.97	0.98	0.0037	0.16	0.8	0.5	1
gut	I	FBgn0035483	Mul1	38472	28.84	368	7.3e-06	0.84	0.00011	0.99	1.7	0.029	FALSE	FALSE	FALSE	FALSE	0.88	0.94	1.1e-05	0.0001	1.7	0.24	0.9	0.48	1
gut	I	FBgn0063495	GstE5	37110	28.51	767.21	0.00019	0.58	0.0013	0.95	1	0.11	FALSE	FALSE	FALSE	FALSE	0.034	0.12	0.17	0.26	0.31	0.87	1	0.65	1
gut	I	FBgn0062442	Cisd2	43459	31.75	809.72	0.00019	0.58	0.0013	0.95	0.62	0.092	FALSE	TRUE	FALSE	FALSE	0.00019	0.0039	0.067	0.13	-0.26	0.99	1	0.45	1
gut	I	FBgn0015321	Ubc4	39133	26.8	488.82	9.9e-05	0.65	0.00081	0.96	0.66	0.074	FALSE	TRUE	FALSE	FALSE	6.3e-05	0.002	0.03	0.065	-0.31	1	1	0.9	1
gut	I	FBgn0000479	dnc	31309	29.65	1852.08	0.00013	0.63	0.00099	0.96	0.74	0.12	FALSE	FALSE	FALSE	FALSE	0.042	0.15	3e-07	5.6e-06	1.2	0.73	1	0.56	1
gut	I	FBgn0035601	Uev1A	38613	30.01	1509.35	0.00058	0.47	0.0031	0.92	0.48	0.091	FALSE	FALSE	FALSE	FALSE	0.069	0.2	0.17	0.26	0.17	0.44	1	0.86	1
gut	I	FBgn0036365	cmb	39513	26.48	373.87	0.0041	0.25	0.015	0.8	0.81	0.3	FALSE	FALSE	FALSE	FALSE	0.08	0.22	1.4e-05	0.00012	1.5	0.8	1	0.97	1
gut	I	FBgn0027532	CG7139	40448	25.38	1217.07	0.0056	0.22	0.019	0.77	0.7	0.16	FALSE	FALSE	FALSE	FALSE	0.052	0.17	0.84	0.89	0.045	0.83	1	0.31	1
gut	I	FBgn0000442	Pkg21D	33253	26.5	905.06	0.0029	0.29	0.011	0.83	0.69	0.17	FALSE	FALSE	FALSE	FALSE	0.22	0.41	5.5e-05	0.00037	1	0.53	1	0.79	1
gut	I	FBgn0034138	RpS15	36851	33.8	23336.2	0.041	0.059	0.091	0.43	0.25	0.28	FALSE	FALSE	FALSE	FALSE	0.021	0.093	0.19	0.29	-0.15	0.65	1	0.2	1
gut	I	FBgn0034420	CG10737	37202	28.99	1731.02	1.7e-05	0.81	0.0002	0.99	0.69	0.058	FALSE	FALSE	FALSE	FALSE	0.26	0.46	7e-07	1.1e-05	0.88	0.19	0.85	0.82	1
gut	I	FBgn0021795	Tapdelta	45680	31.83	1494.89	0.021	0.11	0.055	0.59	0.25	0.27	FALSE	FALSE	FALSE	FALSE	0.094	0.24	0.98	0.99	0.0029	0.25	0.91	0.23	1
gut	I	FBgn0027537	Nup93-1	32350	26.78	432.68	1.1e-05	0.84	0.00014	0.99	0.83	0.034	FALSE	FALSE	FALSE	FALSE	0.0083	0.049	0.078	0.14	0.26	0.88	1	0.75	1
gut	I	FBgn0014141	cher	42066	33.21	1970.61	0.0015	0.39	0.0067	0.89	0.27	0.18	FALSE	FALSE	FALSE	FALSE	0.0091	0.053	3.4e-07	6.2e-06	0.57	0.35	0.99	0.67	1
gut	I	FBgn0086443	AsnRS	35194	31.11	2421.08	8.2e-06	0.86	0.00012	0.99	0.48	0.022	FALSE	FALSE	TRUE	FALSE	0.13	0.31	0.00095	0.0038	0.31	0.074	0.63	0.11	1
gut	I	FBgn0028968	gammaCOP	43717	26.39	2707.75	1.6e-05	0.82	0.0002	0.99	0.84	0.03	FALSE	FALSE	FALSE	FALSE	0.005	0.034	0.2	0.3	0.19	0.93	1	0.12	1
gut	I	FBgn0040827	CG13315	50300	27.68	23002.4	0.0043	0.27	0.015	0.81	0.69	0.26	FALSE	FALSE	FALSE	FALSE	0.39	0.59	0.056	0.11	0.43	0.39	1	0.42	1
gut	I	FBgn0051639	CG31639	39102	28.33	0.09	0.0017	0.38	0.0074		0.42	0.046	FALSE	FALSE	TRUE	FALSE	0.73	0.85	0.0051	0.015	0.36	0.046	0.55	0.64
gut	I	FBgn0053519	Unc-89	3346201	31.66	1013.81	0.0019	0.37	0.0081	0.88	0.25	0.24	FALSE	FALSE	TRUE	FALSE	0.12	0.29	1.4e-05	0.00012	0.41	0.041	0.53	0.91	1
gut	I	FBgn0034860	CG9812	37709	28.29	117.68	9.2e-05	0.7	0.00077	0.97	1.7	0.091	FALSE	FALSE	FALSE	FALSE	0.0013	0.014	5.7e-09	2.5e-07	3.6	1	1	0.23	1
gut	I	FBgn0033504	CAP	36084	31.11	2350.36	0.00016	0.64	0.0012	0.96	0.39	0.11	FALSE	FALSE	FALSE	FALSE	3.8e-05	0.0015	3.5e-10	3.6e-08	1	0.99	1	0.59	1
gut	I	FBgn0039705	Atg16	326115	26.52	488.25	0.00013	0.66	0.001	0.97	0.77	0.051	FALSE	FALSE	FALSE	FALSE	0.68	0.82	0.00048	0.0022	0.67	0.14	0.78	0.28	1
gut	I	FBgn0036671	CG9951	39888	24.06	280.24	0.0068	0.23	0.022	0.78	1.3	0.16	FALSE	FALSE	FALSE	FALSE	0.0048	0.033	0.15	0.24	-0.64	0.99	1	0.1	1
gut	I	FBgn0261552	ps	44258	31.36	4213.3	0.00019	0.64	0.0013	0.96	0.37	0.099	FALSE	FALSE	TRUE	FALSE	0.31	0.51	8.8e-06	8.4e-05	0.49	0.03	0.47	0.48	1
gut	I	FBgn0031651	mRpL24	33703	28.78	424.96	0.00022	0.63	0.0015	0.96	0.41	0.075	FALSE	FALSE	FALSE	FALSE	0.063	0.19	0.086	0.15	0.16	0.24	0.9	0.33	1
gut	I	FBgn0011640	lark	38811	30.03	539.65	9.8e-05	0.71	0.00081	0.97	0.44	0.053	FALSE	FALSE	FALSE	FALSE	0.014	0.072	0.26	0.37	0.1	0.48	1	0.95	1
gut	I	FBgn0032454	CG5787	34684	27.53	463.73	0.00033	0.6	0.0021	0.95	0.71	0.083	FALSE	FALSE	FALSE	FALSE	0.046	0.16	7.3e-07	1.1e-05	1.2	0.73	1	0.49	1
gut	I	FBgn0002921	Atpalpha	48971	35.29	11031.6	0.021	0.13	0.054	0.64	0.2	0.36	FALSE	FALSE	TRUE	FALSE	0.31	0.51	0.3	0.42	0.083	0.029	0.47	0.89	1
gut	I	FBgn0033264	Nup50	35784	30.25	456.21	0.033	0.096	0.077	0.56	0.31	0.21	FALSE	FALSE	TRUE	FALSE	0.93	0.96	0.042	0.085	0.3	0.054	0.58	0.048	0.93
gut	I	FBgn0265042	Irk1	42742	26.84	1866.36	0.0099	0.21	0.03	0.76	0.7	0.23	FALSE	FALSE	FALSE	FALSE	0.22	0.41	0.00018	0.00099	1.1	0.61	1	0.62	1
gut	I	FBgn0263198	Acn	35173	28.34	663.22	0.023	0.12	0.059	0.62	0.34	0.22	FALSE	FALSE	FALSE	FALSE	0.49	0.67	0.0027	0.009	0.48	0.16	0.79	0.97	1
gut	I	FBgn0052023	CG32023	317827	25.13	792.03	0.017	0.15	0.046	0.68	0.51	0.36	FALSE	FALSE	FALSE	FALSE	0.21	0.4	0.00031	0.0015	0.87	0.52	1	0.77	1
gut	I	FBgn0033739	Dyb	36362	25.3	856.08	0.0026	0.37	0.01	0.88	0.54	0.17	FALSE	FALSE	TRUE	FALSE	0.88	0.94	0.0042	0.013	0.51	0.089	0.67	0.42	1
gut	I	FBgn0017550	Rga	40683	24.81	677.9	0.0037	0.33	0.014	0.85	0.83	0.13	FALSE	FALSE	FALSE	FALSE	0.043	0.15	5.1e-06	5.4e-05	1.6	0.88	1	0.43	1
gut	I	FBgn0029688	lva	31350	31.95	4543.04	8.2e-05	0.74	0.0007	0.98	0.34	0.058	FALSE	FALSE	TRUE	FALSE	0.14	0.31	9.8e-07	1.5e-05	0.49	0.028	0.46	0.55	1
gut	I	FBgn0039768	CG15533	43612	27.3	3848.01	0.00059	0.56	0.0032	0.95	0.96	0.15	FALSE	FALSE	FALSE	FALSE	0.0045	0.032	0.68	0.76	-0.097	0.98	1	0.39	1
gut	I	FBgn0000250	cact	34969	27.72	1577.3	0.018	0.16	0.048	0.69	0.32	0.17	FALSE	FALSE	FALSE	FALSE	0.0014	0.014	3e-07	5.7e-06	0.96	0.95	1	0.47	1
gut	I	FBgn0034422	CG7137	37204	24.23	84.15	0.0012	0.48	0.0056	0.92	0.85	0.15	FALSE	FALSE	FALSE	FALSE	0.013	0.067	0.96	0.97	-0.012	0.94	1	0.5	1
gut	I	FBgn0034118	Nup62	36830	28.23	164.8	0.0029	0.37	0.011	0.88	0.45	0.15	FALSE	FALSE	FALSE	FALSE	0.35	0.55	0.05	0.099	0.27	0.19	0.84	0.61	1
gut	I	FBgn0031717	Oscillin	33783	27.55	533.12	0.0039	0.34	0.014	0.86	0.62	0.18	FALSE	FALSE	FALSE	FALSE	0.003	0.024	0.14	0.23	-0.29	0.98	1	0.87	1
gut	I	FBgn0261451	trol	45320	35.84	9391.56	7.8e-05	0.76	0.00068	0.98	0.26	0.057	FALSE	FALSE	FALSE	FALSE	0.00092	0.011	3.6e-09	1.8e-07	0.56	0.25	0.91	0.97	1
gut	I	FBgn0010043	GstD7	48340	27.62	217.04	2.6e-05	0.83	0.00029	0.99	1	0.048	FALSE	FALSE	FALSE	FALSE	0.56	0.73	0.00016	0.00088	0.86	0.24	0.89	0.9	1
gut	I	FBgn0002534	Lcp3	35819	24.2	0.16	3.8e-06	0.92	6.6e-05		6.2	0.0058	FALSE	TRUE	FALSE	FALSE	0.00048	0.0072	0.6	0.7	0.51	1	1	0.96
gut	I	FBgn0023167	SmD3	36306	27.82	140.69	0.0018	0.44	0.0075	0.91	1.1	0.16	FALSE	FALSE	FALSE	FALSE	0.73	0.85	0.0053	0.016	0.97	0.33	0.98	0.93	1
gut	I	FBgn0022708	Adk2	37834	34.04	2528.83	2.3e-05	0.84	0.00026	0.99	0.47	0.032	FALSE	TRUE	FALSE	FALSE	2.1e-05	0.0011	0.026	0.058	-0.2	0.99	1	0.85	1
gut	I	FBgn0028371	jbug	43997	28.01	1087.43	0.013	0.2	0.038	0.75	0.5	0.34	FALSE	FALSE	FALSE	FALSE	0.0014	0.014	2.3e-07	4.6e-06	1.5	0.99	1	0.64	1
gut	I	FBgn0261800	LanB1	34068	32.05	999.06	9.5e-06	0.89	0.00013	0.99	0.49	0.03	FALSE	FALSE	FALSE	FALSE	0.00011	0.0027	1.6e-10	2.3e-08	1.1	0.97	1	0.62	1
gut	I	FBgn0036300	Pmm2	39436	30.08	755.84	0.00024	0.68	0.0016	0.97	0.56	0.083	FALSE	FALSE	TRUE	FALSE	0.83	0.91	0.00046	0.0021	0.52	0.047	0.55	0.33	1
gut	I	FBgn0002590	RpS5a	32700	34.37	23284.6	0.012	0.22	0.035	0.77	0.24	0.19	FALSE	FALSE	FALSE	FALSE	0.037	0.13	0.7	0.78	-0.033	0.28	0.93	0.82	1
gut	I	FBgn0024958	Irp-1A	42689	30.21	1388.08	0.0076	0.28	0.024	0.81	0.27	0.1	FALSE	FALSE	FALSE	FALSE	0.077	0.21	0.72	0.8	0.033	0.22	0.88	0.0055	0.42
gut	I	FBgn0010238	Lac	36363	28.12	121.5	0.0047	0.34	0.016	0.86	0.67	0.24	FALSE	FALSE	FALSE	FALSE	0.0026	0.022	2e-07	4.2e-06	1.7	0.98	1	0.48	1
gut	I	FBgn0000667	Actn	31166	33.93	922.52	0.0085	0.26	0.026	0.81	0.18	0.29	FALSE	FALSE	TRUE	FALSE	0.67	0.81	0.0022	0.0076	0.21	0.0011	0.31	0.91	1
gut	I	FBgn0038181	CG9297	41688	28.33	300.34	0.00082	0.55	0.0042	0.94	0.46	0.15	FALSE	FALSE	FALSE	FALSE	0.093	0.24	0.15	0.24	0.17	0.37	1	0.37	1
gut	I	FBgn0004926	eIF2beta	39433	30.6	2779.42	2.6e-05	0.85	0.00029	0.99	0.51	0.026	FALSE	FALSE	TRUE	FALSE	0.87	0.93	4.2e-05	0.00029	0.49	0.011	0.39	0.98	1
gut	I	FBgn0032819	CG10463	35264	27.49	190.4	1.7e-05	0.88	0.0002	0.99	1	0.035	FALSE	FALSE	FALSE	FALSE	0.011	0.06	0.084	0.15	0.32	0.92	1	0.49	1
gut	I	FBgn0261068	LSm7	35003	29.38	192.31	0.00089	0.55	0.0044	0.94	0.53	0.14	FALSE	FALSE	FALSE	FALSE	0.0038	0.028	0.48	0.59	-0.096	0.93	1	0.5	1
gut	I	FBgn0261393	alpha-Est5	40905	31.54	2473.08	0.0018	0.47	0.0077	0.92	0.26	0.11	FALSE	FALSE	TRUE	FALSE	0.11	0.27	0.22	0.32	0.091	0.057	0.59	0.36	1
gut	I	FBgn0031871	Fgop2	33971	26.15	167.1	0.041	0.11	0.092	0.59	0.41	0.23	FALSE	FALSE	FALSE	FALSE	0.99	0.99	0.043	0.087	0.41	0.11	0.71	0.47	1
gut	I	FBgn0036870	CG14095	40112	30.17	0.17	0.001	0.54	0.0049		1.5	0.035	FALSE	FALSE	FALSE	FALSE	0.71	0.84	0.00032	0.0016	1.7	0.4	1	0.97
gut	I	FBgn0020765	Acp65Aa	38710	30.64	0.29	0.0011	0.54	0.0053		1.3	0.038	FALSE	FALSE	FALSE	FALSE	8.5e-08	3.8e-05	4.9e-12	4.6e-09	5.5	1	1	0.56
gut	I	FBgn0034479	CG8654	37275	27.53	410.81	0.013	0.24	0.036	0.79	0.42	0.28	FALSE	FALSE	FALSE	FALSE	0.089	0.23	0.82	0.88	0.034	0.58	1	0.4	1
gut	I	FBgn0263006	SERCA	49297	33.66	4479.89	0.012	0.24	0.036	0.79	0.16	0.26	FALSE	FALSE	TRUE	FALSE	0.019	0.084	0.39	0.51	-0.051	0.068	0.62	0.99	1
gut	I	FBgn0039226	Ude	42953	28.38	125.98	0.023	0.18	0.058	0.72	0.34	0.29	FALSE	FALSE	FALSE	FALSE	0.00091	0.011	2.2e-07	4.5e-06	1.1	0.98	1	0.6	1
gut	I	FBgn0019637	Atu	40684	24.22	508.5	0.0059	0.34	0.02	0.86	0.85	0.14	FALSE	FALSE	FALSE	FALSE	0.75	0.86	0.016	0.039	0.72	0.29	0.95	0.38	1
gut	I	FBgn0037714	CG9396	41156	24.55	1742.41	0.026	0.17	0.064	0.7	2.5	0.31	FALSE	FALSE	FALSE	FALSE	0.57	0.74	0.12	0.21	1.6	0.63	1	0.53	1
gut	I	FBgn0013269	FK506-bp1	41860	31.52	1168.35	0.0026	0.45	0.01	0.92	0.31	0.16	FALSE	FALSE	FALSE	FALSE	0.049	0.16	4.5e-06	4.9e-05	0.58	0.29	0.94	0.94	1
gut	I	FBgn0051374	sals	41377	27.83	200.86	0.023	0.18	0.058	0.72	0.34	0.36	FALSE	FALSE	FALSE	FALSE	0.052	0.17	3.8e-05	0.00027	0.73	0.61	1	0.83	1
gut	I	FBgn0025381	rush	31105	29.44	1580.6	0.025	0.18	0.062	0.72	0.33	0.19	FALSE	FALSE	FALSE	FALSE	0.21	0.4	0.55	0.66	0.083	0.33	0.97	0.66	1
gut	I	FBgn0051352	Unc-115a	261629	32.46	9336.61	0.028	0.17	0.068	0.7	0.18	0.25	FALSE	FALSE	TRUE	FALSE	0.45	0.64	0.0027	0.009	0.26	0.013	0.39	0.15	1
gut	I	FBgn0011586	e(r)	43951	27.41	271.57	0.00052	0.66	0.0029	0.96	1	0.078	FALSE	FALSE	FALSE	FALSE	0.15	0.33	0.052	0.1	0.49	0.69	1	0.98	1
gut	I	FBgn0030582	CG14411	32408	28.27	1025.42	7.6e-05	0.82	0.00066	0.99	0.57	0.036	FALSE	FALSE	FALSE	FALSE	0.0034	0.027	0.74	0.81	0.038	0.88	1	0.97	1
gut	I	FBgn0033556	CG12343	36143	23.38	352.58	0.037	0.14	0.084	0.66	0.79	0.21	FALSE	FALSE	FALSE	FALSE	0.78	0.88	0.078	0.14	0.65	0.34	0.98	0.38	1
gut	I	FBgn0015245	Hsp60A	32045	35.74	6094	0.001	0.59	0.005	0.95	0.24	0.074	FALSE	FALSE	TRUE	FALSE	0.26	0.46	3e-05	0.00022	0.34	0.0058	0.39	0.22	1
gut	I	FBgn0035755	CG14830	38800	24.54	169.7	0.0031	0.46	0.012	0.92	1.3	0.18	FALSE	FALSE	FALSE	FALSE	0.37	0.57	0.00018	0.00097	1.8	0.61	1	0.65	1
gut	I	FBgn0263598	Vha68-2	45012	37.01	29178.7	0.014	0.27	0.039	0.81	0.21	0.2	FALSE	FALSE	TRUE	FALSE	0.14	0.32	0.59	0.69	0.041	0.062	0.6	0.61	1
gut	I	FBgn0016687	Nurf-38	37922	25.42	3990.67	0.00072	0.64	0.0037	0.96	1.1	0.081	FALSE	FALSE	FALSE	FALSE	0.22	0.41	0.034	0.073	0.61	0.64	1	0.63	1
gut	I	FBgn0017581	Lk6	44672	26.26	10632.4	0.037	0.15	0.084	0.68	1.5	0.24	FALSE	FALSE	FALSE	FALSE	0.18	0.37	0.78	0.85	0.18	0.84	1	0.26	1
gut	I	FBgn0011361	ND-ACP	38154	32.03	1906.17	4.7e-05	0.86	0.00046	0.99	0.64	0.028	FALSE	FALSE	FALSE	FALSE	0.092	0.24	0.012	0.03	0.34	0.41	1	0.66	1
gut	I	FBgn0016701	Rab4	36992	26.1	803.72	0.00029	0.73	0.0019	0.97	0.94	0.053	FALSE	FALSE	FALSE	FALSE	0.11	0.27	0.047	0.094	0.45	0.69	1	0.48	1
gut	I	FBgn0039342	CG5107	43084	28.65	31398.6	0.0005	0.68	0.0028	0.97	0.59	0.091	FALSE	TRUE	FALSE	FALSE	4.5e-10	4.5e-07	1.6e-10	2.3e-08	-1.8	1	1	0.91	1
gut	I	FBgn0032783	CG10237	35222	28.55	532.53	0.00012	0.81	0.00092	0.99	0.68	0.056	FALSE	FALSE	FALSE	FALSE	0.033	0.12	0.12	0.2	0.23	0.71	1	0.9	1
gut	I	FBgn0029676	HIP-R	31335	31.57	712.56	0.0084	0.34	0.026	0.86	0.3	0.12	FALSE	FALSE	FALSE	FALSE	0.0017	0.016	1.9e-07	4e-06	0.83	0.9	1	0.53	1
gut	I	FBgn0051266	CG31266		27.94	2796.67	0.00043	0.71	0.0025	0.97	0.61	0.074	FALSE	TRUE	FALSE	FALSE	0.00011	0.0027	0.016	0.038	-0.38	1	1	0.95	1
gut	I	FBgn0027580	PCB	36020	35.64	5404.7	0.0031	0.48	0.012	0.92	0.2	0.13	FALSE	FALSE	FALSE	FALSE	0.00061	0.0083	0.025	0.056	-0.14	0.53	1	0.73	1
gut	I	FBgn0263289	scrib		28.89	7742.53	5.2e-06	0.95	8.3e-05	1	0.67	0.015	FALSE	FALSE	FALSE	FALSE	0.1	0.26	6.6e-08	1.7e-06	0.92	0.27	0.93	0.91	1
gut	I	FBgn0035589	CHMP2B	38599	27.74	655.75	0.00048	0.7	0.0027	0.97	0.61	0.061	FALSE	FALSE	FALSE	FALSE	0.12	0.28	3.8e-06	4.2e-05	0.95	0.49	1	0.69	1
gut	I	FBgn0001197	His2Av	43229	33.38	1465.86	0.0053	0.42	0.018	0.91	0.33	0.11	FALSE	FALSE	FALSE	FALSE	0.085	0.23	0.56	0.66	0.062	0.31	0.96	0.8	1
gut	I	FBgn0035318	CG9018	38283	26.18	203.44	0.019	0.26	0.05	0.8	0.44	0.17	FALSE	FALSE	FALSE	FALSE	0.14	0.31	0.7	0.78	0.067	0.55	1	0.11	1
gut	I	FBgn0028670	Vha100-2	42216	34.75	15823.4	0.025	0.22	0.063	0.77	0.18	0.22	FALSE	FALSE	TRUE	FALSE	0.23	0.43	0.49	0.6	0.051	0.026	0.45	0.6	1
gut	I	FBgn0030966	CG7280	32878	29.02	308.96	0.017	0.27	0.046	0.81	0.44	0.18	FALSE	FALSE	FALSE	FALSE	0.063	0.19	0.87	0.91	-0.027	0.7	1	0.37	1
gut	I	FBgn0259785	pzg	40351	30.6	1060.11	0.0074	0.4	0.024	0.9	0.29	0.15	FALSE	FALSE	TRUE	FALSE	0.68	0.81	0.002	0.007	0.35	0.027	0.46	0.95	1
gut	I	FBgn0037935	CG6834	41409	26.29	742.12	0.0051	0.46	0.017	0.92	0.54	0.16	FALSE	FALSE	FALSE	FALSE	0.37	0.56	0.076	0.14	0.32	0.32	0.97	0.43	1
gut	I	FBgn0040660	CG13551	50133	32.8	2851.77	8.6e-05	0.86	0.00073	0.99	0.73	0.025	FALSE	FALSE	FALSE	FALSE	0.003	0.024	0.86	0.9	0.027	0.95	1	0.65	1
gut	I	FBgn0011725	twin	42880	26.63	644.83	5.6e-07	0.99	1.5e-05	1	3.2	0.002	FALSE	FALSE	FALSE	FALSE	0.018	0.082	0.0011	0.0042	1.6	0.97	1	0.41	1
gut	I	FBgn0035146	CG13893	38074	26.85	1982.88	0.017	0.3	0.046	0.83	0.43	0.18	FALSE	TRUE	FALSE	FALSE	9.9e-05	0.0026	0.00034	0.0017	-0.73	1	1	0.81	1
gut	I	FBgn0023477	Taldo	37804	32.78	5154.56	0.006	0.45	0.02	0.92	0.37	0.12	FALSE	FALSE	FALSE	FALSE	0.13	0.3	0.4	0.52	0.1	0.33	0.97	0.095	1
gut	I	FBgn0031012	CG8051	32925	27.73	2283.21	0.0023	0.58	0.0092	0.95	0.62	0.083	FALSE	FALSE	FALSE	FALSE	0.34	0.53	0.044	0.089	0.37	0.34	0.98	0.54	1
gut	I	FBgn0027572	CG5009	37028	30.63	2277.85	0.00043	0.76	0.0025	0.98	0.51	0.073	FALSE	FALSE	FALSE	FALSE	0.26	0.46	0.015	0.038	0.32	0.19	0.85	0.83	1
gut	I	FBgn0051793	CG31793	326161	24.27	1334.26	0.0049	0.48	0.017	0.92	0.85	0.12	FALSE	FALSE	FALSE	FALSE	0.033	0.12	0.95	0.97	-0.015	0.91	1	0.79	1
gut	I	FBgn0000559	eEF2	35422	35.92	115499	0.04	0.19	0.09	0.74	0.14	0.14	FALSE	FALSE	FALSE	FALSE	0.023	0.096	0.21	0.31	-0.085	0.11	0.73	0.36	1
gut	I	FBgn0037696	GstZ1	41132	27.51	79.15	0.0031	0.54	0.012	0.94	0.65	0.13	FALSE	FALSE	FALSE	FALSE	0.091	0.24	0.38	0.5	0.17	0.69	1	0.88	1
gut	I	FBgn0004512	Mdr49	36428	30.86	9728.43	0.032	0.22	0.076	0.77	0.35	0.15	FALSE	FALSE	FALSE	FALSE	0.16	0.34	0.82	0.88	0.035	0.45	1	0.27	1
gut	I	FBgn0030357	Sclp	32156	25.3	362.41	9.1e-05	0.87	0.00076	0.99	2.7	0.028	FALSE	TRUE	FALSE	FALSE	0.00016	0.0033	0.1	0.18	-0.94	1	1	0.21	1
gut	I	FBgn0040534	Sf3b5	50007	24.43	78.62	0.005	0.49	0.017	0.92	1.1	0.15	FALSE	FALSE	FALSE	FALSE	0.58	0.75	0.027	0.06	0.86	0.45	1	0.28	1
gut	I	FBgn0032897	CG9336	35355	29.71	1043.82	0.01	0.39	0.031	0.89	0.43	0.22	FALSE	FALSE	FALSE	FALSE	0.56	0.73	0.058	0.11	0.3	0.16	0.8	0.86	1
gut	I	FBgn0030792	CG4789	32668	23.97	513.95	0.0031	0.56	0.012	0.95	2.2	0.088	FALSE	FALSE	FALSE	FALSE	0.35	0.55	0.053	0.1	1.3	0.71	1	0.15	1
gut	I	FBgn0000635	Fas2	31364	32.96	2482.22	0.0091	0.41	0.028	0.9	0.23	0.17	FALSE	FALSE	TRUE	FALSE	0.85	0.92	0.0051	0.015	0.25	0.0052	0.39	0.12	1
gut	I	FBgn0030512	Nadsyn	32328	24.64	991.34	0.025	0.26	0.063	0.81	0.37	0.18	FALSE	FALSE	FALSE	FALSE	0.069	0.2	0.77	0.84	-0.045	0.64	1	0.14	1
gut	I	FBgn0032387	CG16965	34607	29.16	2309.94	0.00095	0.71	0.0046	0.97	0.51	0.073	FALSE	TRUE	FALSE	FALSE	5.9e-05	0.0019	0.003	0.0097	-0.44	1	1	0.73	1
gut	I	FBgn0260400	elav	31000	24.13	131.27	0.012	0.37	0.036	0.88	1.8	0.23	FALSE	FALSE	FALSE	FALSE	0.7	0.83	0.0037	0.012	2.1	0.51	1	0.41	1
gut	I	FBgn0039110	RanBP3	42804	26.77	472.14	0.01	0.4	0.031	0.9	0.63	0.13	FALSE	FALSE	FALSE	FALSE	0.061	0.19	0.96	0.97	0.011	0.81	1	0.45	1
gut	I	FBgn0023514	CG14805	31146	26.03	708.62	0.0017	0.65	0.0072	0.96	0.54	0.06	FALSE	FALSE	TRUE	FALSE	0.99	0.99	0.0017	0.0063	0.54	0.06	0.6	0.3	1
gut	I	FBgn0264975	Nrg	31792	29.2	588.46	8.2e-05	0.89	0.0007	0.99	0.46	0.035	FALSE	FALSE	FALSE	FALSE	0.00059	0.0082	2.5e-09	1.5e-07	0.99	0.92	1	0.68	1
gut	I	FBgn0030364	Lsm12	32167	26.24	644.11	0.0013	0.68	0.0059	0.97	0.75	0.063	FALSE	FALSE	FALSE	FALSE	0.88	0.94	0.002	0.0072	0.71	0.15	0.79	1	1
gut	I	FBgn0010516	wal	36252	35.29	5384.2	8.4e-05	0.89	0.00072	0.99	0.44	0.02	FALSE	FALSE	FALSE	FALSE	0.029	0.11	1.3e-07	3e-06	0.72	0.34	0.98	0.98	1
gut	I	FBgn0086472	RpS25	41343	33.82	17899.7	0.0061	0.49	0.02	0.92	0.25	0.13	FALSE	FALSE	FALSE	FALSE	0.012	0.064	0.41	0.53	-0.067	0.41	1	1	1
gut	I	FBgn0027055	CSN3	40308	27.19	549.56	0.0027	0.61	0.01	0.95	0.7	0.054	FALSE	FALSE	FALSE	FALSE	0.4	0.59	0.037	0.076	0.45	0.37	1	0.35	1
[truncated: 2,956 more rows]
