# Supplementary material for: Tissue-specific modulation of gene expression in response to lowered insulin signalling in Drosophila
Source: eLife. 2021 Apr 21;10:e67275. doi: 10.7554/eLife.67275 (PMC8060030; doi:10.7554/eLife.67275)
Supplement: Supplementary file 5. — Columns listed as: Tissue, Quadrant (Quadrants by direction of log2(fold-change): I (protein+;transcript+), II (protein−;transcript+), III (protein−;transcript−), and IV (protein+;transcript−)), Protein flybase ID, protein symbol (Gene name), protein entrez ID, protein avg expr (Average LFQ intensity of this protein in all samples in the respective tissue), RNA avg expr (Average transcript expression of the corresponding transcript in the respective tissue), protein p-value (dilp2-3,5 v. wDah), RNA p-value (dilp2-3,5 v. wDah), Protein adj p-value (dilp2-3,5 v. wDah FDR), Protein logFC (dilp2-3,5 v. wDah), RNA LogFC (dilp2-3,5 v. wDah), opposite (Are protein and transcript changed in opposite direction?), Wolbachia dependence (Does the protein change in dilp2-3,5 vs wDah depend on Wolbachia status?), Wolbachia independence (Is the protein change in dilp2-3,5 vs wDah independent of Wolbachia status?), RNA Wolbachia dependence (Does the transcript change in dilp2-3,5 vs wDah depend on Wolbachia status?), interaction p-value (Protein p-value, interaction term (dilp2-3,5 vs. wDah ~ Wol+ vs. Wol-)), interaction adj p-value (Protein FDR, interaction term (dilp2-3,5 vs. wDah ~ Wol+ vs. Wol-)), dilpT p-value (Protein p-value, dilp2-3,5/Wol- vs. wDah/Wol-), dilpT adj p-value (Protein FDR, dilp2-3,5/Wol- vs. wDah/Wol-), protein LogFC (Protein log2(fold-change), dilp2-3,5/Wol- vs. wDah/Wol-), TOST p-value (Protein P-value, two-one-sided-t-test of equivalence, interaction term (dilp2-3,5 vs. wDah ~ Wol+ vs. Wol-)), TOST adj p-value (Protein p-value, two-one-sided-t-test of equivalence, interaction term (dilp2-3,5 vs. wDah ~ Wol+ vs. Wol-)). Wol+/- denotes the presence (+) or absence (-) of Wolbachia in formulae. Genotypes denoted as wDah and dilp (2-3,5) with Wolbachia and wDahT and dilpT (2-3,5) without Wolbachia. [file elife-67275-supp5.xlsx]

## Sheet: Summary
GO term analysis, dilp2-3,5 vs. wDah	Geneset	Geneset on which enrichment analysis was performed. Significant protein/transcript pairs from fat, gut, brain, or thorax, in one of four quadrants (see Figure 2):		(II): Protein up, transcript down	(I): Protein up, transcript up
				(III): Protein down, transcript down	(IV): Protein down, transcript up
Quadrants correspond to Figure 2	GO ID	Gene ontology ID
	Ontology	Gene ontology domain (Biological Process, Molecular Function, or Cellular Compartment)
	Term	Gene ontology term
	Annotated	Number of genes annotated with the term in the tissue-specific background
	Significant	Number of significant genes annotated with the term in the tissue-specific background
	Expected	Expected number of significant genes annotated with the term, given the background
	Enrichment	Enrichment of the observed over the expected number of significant genes
	log2Enrichment	Log2 of enrichment
	P.Val.	P-value of enrichment (Fisher test)
	adj.P.Val.	adjusted P-Value of enrichment (BH-method)
	Genes	Names of significant genes annotated with the term

## Sheet: Quadrants GO enrichment, protei
Tissue	Quadrant	Primary	Is.primary	Terms.in.cluster	GO.ID	Term	Ontology	Annotated	Significant	Expected	Enrichment	log2Enrichment	Fisher	Primary.Fisher.adj	Genes	Genes.in.secondary
Fat	I	proteasome core complex	TRUE	4	GO:0005839	proteasome core complex	CC	8	8	2	4	2	1.5e-05	0.00046	Prosbeta3, Prosalpha7, Prosalpha1, Prosbeta1, Prosbeta4, Prosalpha2, Prosalpha6, Prosbeta6	CG6067, CG3107, CG6357, CG8728
Fat	I	pteridine-containing compound metabolic process	TRUE	3	GO:0042558	pteridine-containing compound metabolic process	BP	5	5	1.3	4	2	0.00099	0.013	pug, CG8665, Sptr, DhpD, Dhfr	P5cr-2, LKRSDH
Fat	I	cellular metabolic compound salvage	TRUE	1	GO:0043094	cellular metabolic compound salvage	BP	5	5	1.3	4	2	0.00099	0.013	Pdxk, AdenoK, Aprt, Adi1, AMPdeam
Fat	I	proteasome complex	TRUE	13	GO:0000502	proteasome complex	CC	17	14	4.3	3.3	1.7	1.1e-06	5.3e-05	Prosbeta3, Prosalpha7, CG31639, Prosalpha1, Prosbeta1, Prosbeta4, Prosalpha2, CG9588, Prosalpha6, Prosbeta6, Rpt3, Rpn1, Rpn12, TER94	shrb, Usp7
Fat	I	cellular amino acid catabolic process	TRUE	2	GO:0009063	cellular amino acid catabolic process	BP	11	9	2.8	3.2	1.7	0.00013	0.0025	hgo, GstZ2, ppl, GstZ1, CG9547, CG7860, Hn, CG3999, Ssadh	Gdh
Fat	I	cellular aldehyde metabolic process	TRUE	1	GO:0006081	cellular aldehyde metabolic process	BP	6	5	1.5	3.3	1.7	0.0047	0.041	CG10638, CG4390, Rpi, AOX3, Aldh
Fat	I	Rab protein signal transduction	TRUE	2	GO:0032482	Rab protein signal transduction	BP	6	5	1.5	3.3	1.7	0.0047	0.041	Rab11, Rab5, Rab9, Rab6, Rab10	CG14184, shrb
Fat	I	proteasome accessory complex	TRUE	2	GO:0022624	proteasome accessory complex	CC	6	5	1.5	3.3	1.7	0.0047	0.041	CG31639, CG9588, Rpt3, Rpn1, Rpn12
Fat	I	hydrolase activity, acting on carbon-nitrogen (but not peptide) bonds, in cyclic amidines	TRUE	1	GO:0016814	hydrolase activity, acting on carbon-nitrogen (but not peptide) bonds, in cyclic amidines	MF	6	5	1.5	3.3	1.7	0.0047	0.041	pug, CG8353, CG11089, DhpD, AMPdeam
Fat	I	acyl-CoA metabolic process	TRUE	2	GO:0006637	acyl-CoA metabolic process	BP	8	6	2	3	1.6	0.0043	0.041	scu, ATPCL, CG7920, AcCoAS, CG8199, CG1774
Fat	I	serine family amino acid metabolic process	TRUE	1	GO:0009069	serine family amino acid metabolic process	BP	8	6	2	3	1.6	0.0043	0.041	Gnmt, CG11899, ppl, Shmt, CG3999, Dhfr
Fat	I	coenzyme metabolic process	TRUE	2	GO:0006732	coenzyme metabolic process	BP	29	18	7.3	2.5	1.3	2.4e-05	0.00065	Gnmt, Pdxk, Gdh, scu, Ald, pug, ATPCL, CG8665, CG8080, CG7920, sgll, Rpi, Sptr, CG7277, AcCoAS, CG8199, CG1774, Dhfr	FeCH, Ppox, CG4858
Fat	I	organonitrogen compound catabolic process	TRUE	1	GO:1901565	organonitrogen compound catabolic process	BP	23	14	5.8	2.4	1.3	0.00027	0.0044	hgo, GstZ2, Gdh, ppl, CG8353, CG8665, GstZ1, Sply, CG9547, CG7860, Hn, DhpD, CG3999, Ssadh
Fat	I	small molecule catabolic process	TRUE	1	GO:0044282	small molecule catabolic process	BP	43	24	11	2.2	1.2	1.3e-05	0.00044	hgo, Idh, GstZ2, CG6543, Gdh, SCOT, ppl, yip2, CG4390, fbp, CG6910, GstZ1, Thiolase, CG9547, CG7860, Hn, CG9391, CG9577, Mtpalpha, CG3999, CRAT, Ssadh, CG4860, CG17027
Fat	I	hydrolase activity, acting on carbon-nitrogen (but not peptide) bonds	TRUE	1	GO:0016810	hydrolase activity, acting on carbon-nitrogen (but not peptide) bonds	MF	21	12	5.3	2.3	1.2	0.0017	0.021	pug, CG8132, CG8353, CG11089, HDAC6, CRMP, CG7860, DhpD, CG1827, CG6428, CG4752, AMPdeam
Fat	I	coenzyme biosynthetic process	TRUE	2	GO:0009108	coenzyme biosynthetic process	BP	15	9	3.8	2.4	1.2	0.0042	0.041	Pdxk, pug, ATPCL, CG8080, sgll, Sptr, CG7277, AcCoAS, CG8199	FeCH, Ppox, CG4858
Fat	I	cellular amino acid metabolic process	TRUE	1	GO:0006520	cellular amino acid metabolic process	BP	38	21	9.6	2.2	1.1	5.8e-05	0.0012	hgo, GstZ2, CG11899, ppl, P5cr-2, CG15093, GstZ1, Shmt, Got2, CG9547, CG7860, Hn, CG3999, Adi1, CG7470, CG17896, Ssadh, TrpRS-m, CG6428, CG10399, Dhfr
Fat	I	carboxylic acid catabolic process	TRUE	2	GO:0046395	carboxylic acid catabolic process	BP	33	18	8.3	2.2	1.1	0.00025	0.0044	hgo, Idh, GstZ2, CG6543, Gdh, ppl, yip2, GstZ1, Thiolase, CG9547, CG7860, Hn, CG9577, Mtpalpha, CG3999, CRAT, Ssadh, CG4860
Fat	I	alpha-amino acid metabolic process	TRUE	1	GO:1901605	alpha-amino acid metabolic process	BP	30	16	7.6	2.1	1.1	0.00079	0.012	Gnmt, hgo, GstZ2, CG11899, Gdh, ppl, P5cr-2, GstZ1, Shmt, Got2, CG9547, CG7860, CG3999, Adi1, CG7470, Dhfr
Fat	I	isomerase activity	TRUE	1	GO:0016853	isomerase activity	MF	31	16	7.8	2	1	0.0013	0.016	GstZ2, CG5919, GstZ1, Gip, CG6745, FK506-bp2, CG4598, CG4594, Oscillin, Rpi, Gale, CG9577, FKBP59, ERp60, CG11858, scf
Fat	I	cellular catabolic process	TRUE	1	GO:0044248	cellular catabolic process	BP	86	43	22	2	0.99	2.8e-07	1.9e-05	Gnmt, hgo, Idh, GstZ2, CG6543, Gdh, SCOT, ppl, yip2, CG4390, CG8353, CG6910, CG8665, GstZ1, Cyp6g1, Thiolase, Sply, Prosbeta3, CG9547, Prosalpha7, Prx6005, CG7860, Hn, CG31639, DhpD, Prosalpha1, shrb, CG9577, Mtpalpha, Prosbeta1, CG3999, CRAT, Prosbeta4, Prosalpha2, Ssadh, Prosalpha6, Prosbeta6, CG4860, Rpt3, Rpn1, Rpn12, TER94, Usp7
Fat	I	oxoacid metabolic process	TRUE	2	GO:0043436	oxoacid metabolic process	BP	97	47	24	1.9	0.94	2.5e-07	1.9e-05	hgo, Idh, GstZ2, CG11899, CG6543, Gdh, bgm, scu, Ald, ppl, P5cr-2, yip2, Mdh1, ATPCL, CG15093, GstZ1, CG18609, Gip, Thiolase, Shmt, Pdk, Got2, Men, Sply, CG10932, CG9547, CG31523, CG7860, Hn, CG9577, PCB, Mtpalpha, CG3999, CRAT, Adi1, CG16935, AcCoAS, CG7470, CG17896, Aldh, Ssadh, CG4860, TrpRS-m, ACC, CG6428, CG10399, Dhfr
Fat	I	organic substance catabolic process	TRUE	2	GO:1901575	organic substance catabolic process	BP	97	45	24	1.8	0.88	2.2e-06	9.4e-05	hgo, Idh, GstZ2, CG6543, Gdh, SCOT, Ald, ppl, yip2, CG4390, CG8353, fbp, CG6910, CG8665, GstZ1, Thiolase, Sply, Prosbeta3, Oscillin, CG9547, Prosalpha7, CG7860, Hn, CG31639, CG9391, DhpD, Prosalpha1, shrb, CG9577, Mtpalpha, Prosbeta1, CG3999, CRAT, Prosbeta4, Prosalpha2, Ssadh, Prosalpha6, Prosbeta6, CG4860, Rpt3, Rpn1, Rpn12, TER94, CG17027, Usp7	Gnmt, Cyp6g1, Prx6005
Fat	I	organic acid metabolic process	TRUE	1	GO:0006082	organic acid metabolic process	BP	120	55	30	1.8	0.85	3.2e-07	1.9e-05	Gnmt, hgo, Idh, GstZ2, CG11899, CG11796, CG6543, Gdh, bgm, scu, Faa, Ald, ppl, P5cr-2, yip2, Mdh1, ATPCL, CG15093, Scsalpha, HDAC6, GstZ1, CG18609, Gip, Thiolase, Shmt, Pdk, Got2, Men, Sply, CG1461, CG10932, CG9547, CG5599, CG31523, CG7860, Hn, CG9577, skap, PCB, Mtpalpha, CG3999, CRAT, Adi1, CG16935, AcCoAS, CG7470, CG17896, Aldh, Ssadh, CG4860, TrpRS-m, ACC, CG6428, CG10399, Dhfr
Fat	I	nucleobase-containing small molecule metabolic process	TRUE	1	GO:0055086	nucleobase-containing small molecule metabolic process	BP	67	30	17	1.8	0.83	0.00028	0.0044	Gnmt, Gdh, AdenoK, Ald, CG8353, CG11089, ox, CG16758, Paics, CG6767, CRMP, CG8080, CG33054, su(r), CG2246, Rpi, wal, DhpD, Aprt, Adk3, ATPsyngamma, CG12065, COX7C, CG33056, CG17896, levy, Uro, AMPdeam, Scox, Dhfr
Fat	I	small molecule metabolic process	TRUE	1	GO:0044281	small molecule metabolic process	BP	230	100	57	1.8	0.81	4.3e-12	1.3e-09	Gnmt, hgo, Idh, GstZ2, CG11899, CG11796, CG6543, Gdh, SCOT, bgm, AdenoK, Galk, scu, Faa, Ald, ppl, P5cr-2, yip2, CG4390, Ahcy, CG8353, Mdh1, ATPCL, CG15093, CG11089, ox, fbp, Scsalpha, CG16758, HDAC6, Paics, CG6910, CG8665, GstZ1, CG6767, CG18609, Gip, CG10924, Thiolase, Shmt, CRMP, Pdk, CG8080, Got2, CG33054, Men, LManII, Sply, CG1461, CG10932, su(r), sgll, CG9547, CG5599, CG2246, Rpi, CG31523, …
Fat	I	mitochondrial matrix	TRUE	1	GO:0005759	mitochondrial matrix	CC	53	23	13	1.7	0.78	0.0025	0.029	CG6543, Gdh, SCOT, Scsalpha, Thiolase, Pdk, Got2, CG9547, CG5599, wal, PCB, CG3107, Mtpalpha, Adk3, sra, CG11267, CG8199, Aldh, CG10399, mRpL12, mRpS7, mRpL4, CG8728
Fat	I	lipid droplet	TRUE	1	GO:0005811	lipid droplet	CC	110	46	27	1.7	0.74	3.9e-05	0.0009	Idh, CG6543, scu, yip2, pug, Mdh1, ATPCL, CG15093, Mgstl, CG1648, Thiolase, Got2, Cyt-b5-r, porin, CG10932, CG7920, Rtnl1, eEF1beta, wal, Hn, Rab11, CG7461, CG9577, PCB, Mtpalpha, alphaTub84D, Hsc70-4, eEF1alpha1, Akap200, ATPsyngamma, Rab5, CG32694, CG11267, ERp60, CG7470, Aldh, levy, Capr, CG33129, ACC, Lsp1beta, mRpL12, Tps1, TER94, CCT6, rin
Fat	I	mitochondrion	TRUE	1	GO:0005739	mitochondrion	CC	170	72	43	1.7	0.73	2.3e-07	1.9e-05	Idh, CG6543, Gdh, Cyp12e1, SCOT, CG3902, scu, ppl, yip2, CG15093, ox, Scsalpha, Mgstl, CG10924, Thiolase, Shmt, Pdk, CG8080, Got2, Cyt-b5-r, porin, CG4598, CG4594, CG10932, CG7920, CG9547, mge, CG5599, wal, CG14483, skap, PCB, CG3107, Mtpalpha, mTTF, vib, Hsc70-4, FeCH, DPCoAC, CRAT, Adk3, CG16935, sra, ATPsyngamma, Ppox, CG8993, Alr, CG11267, COX7C, CG8199, CG7470, CG1640, CG17896, Aldh, PHGPx, …
Fat	I	cofactor binding	TRUE	1	GO:0048037	cofactor binding	MF	69	28	17	1.6	0.69	0.0029	0.033	Idh, CG3902, Dbi, ATPCL, CG15093, Scsalpha, CG6287, D2hgdh, Shmt, Got2, Men, Sply, CG1461, CG1665, sgll, CG9547, wal, CG7461, CG9512, CG7277, Arc42, AOX3, CG1640, CG17896, CG8814, CG4860, Dhfr, CG4199
Fat	I	oxidation-reduction process	TRUE	1	GO:0055114	oxidation-reduction process	BP	170	68	43	1.6	0.68	3.3e-06	0.00012	hgo, Idh, CG11796, CG10512, CG6543, Gdh, Cyp12e1, CG3902, CG10638, CG5321, Sodh-2, P5cr-2, yip2, pug, Mdh1, CG15093, ox, Scsalpha, Cat, HDAC6, CG6287, CG6910, CG8665, Cyp6g1, D2hgdh, Thiolase, CG10863, Cyp4p1, Men, su(r), sgll, CG9547, CG5599, Prx6005, Sptr, Hn, CG7461, CG9577, skap, Mtpalpha, CG9512, CG7277, Arc42, CG3999, CRAT, Adi1, CG16935, Ppox, Alr, COX7C, AOX3, CG7470, CG17896, Aldh, PHGPx…
Fat	I	cytosol	TRUE	1	GO:0005829	cytosol	CC	120	48	30	1.6	0.67	0.00014	0.0026	Gdh, CG3902, AdenoK, scu, Ald, iPLA2-VIA, CG34424, Mdh1, Paics, smp-30, eIF1A, Chchd2, Men, UGP, CG7920, RpL31, Rtnl1, eEF1beta, Prx6005, RpLP2, RpL13A, eIF2Balpha, RpL29, eEF1alpha1, Pdcd4, S6k, RpS8, CG1640, RpS21, Capr, RpL17, Tm1, Tango2, RpS7, eIF4A, CBP, Hsc70Cb, AMPdeam, eIF2beta, cib, mRpS7, CCT6, RpLP1, lost, nudC, rin, stai, CG31694
Fat	I	oxidoreductase activity	TRUE	1	GO:0016491	oxidoreductase activity	MF	180	70	47	1.5	0.59	3e-05	0.00076	hgo, Idh, CG2070, CG11796, CG10512, Gdh, Cyp12e1, CG3902, CG10638, CG7322, CG5321, scu, Sodh-2, P5cr-2, pug, Mdh1, CG15093, ox, CG9471, Cat, CG6287, CG6910, CG8665, Cyp6g1, D2hgdh, Thiolase, CG10863, Cyp4p1, Cyt-b5-r, Men, su(r), sgll, CG9547, Prx6005, Sptr, Hn, CG7461, cl, CG6523, CG31548, Mtpalpha, CG9512, CG7277, Arc42, CG3999, Adi1, CG16935, CG17121, Skeletor, Ppox, CG8993, Alr, COX7C, AOX3, …
Fat	I	mitochondrial part	TRUE	1	GO:0044429	mitochondrial part	CC	110	40	27	1.5	0.56	0.0031	0.034	CG6543, Gdh, SCOT, ox, Scsalpha, Mgstl, Thiolase, Pdk, Got2, porin, CG9547, mge, CG5599, wal, PCB, CG3107, Mtpalpha, Hsc70-4, FeCH, DPCoAC, Adk3, sra, ATPsyngamma, Ppox, CG11267, COX7C, CG8199, CG7470, Aldh, levy, CG10399, mRpL12, CG7394, Scox, Miro, Surf1, mRpS7, Tom40, mRpL4, CG8728
Fat	II	nuclear DNA replication	TRUE	11	GO:0033260	nuclear DNA replication	BP	5	5	0.73	6.9	2.8	6.2e-05	0.00029	Mcm5, Mcm6, Mcm3, Mcm2, Mcm7	dpa, RPA2, His2A:CG33853
Fat	II	histone exchange	TRUE	2	GO:0043486	histone exchange	BP	5	5	0.73	6.9	2.8	6.2e-05	0.00029	P32, pont, rept, MRG15, Chrac-14	Snr1, Iswi, brm
Fat	II	DNA-dependent DNA replication	TRUE	2	GO:0006261	DNA-dependent DNA replication	BP	12	11	1.7	6.3	2.7	5e-09	9.2e-08	dpa, Mcm5, Mcm6, Mcm3, RPA2, RfC38, Mcm2, RfC4, Mcm7, PCNA, TFAM	RnrL, mtSSB, Gnf1
Fat	II	protein-DNA complex assembly	TRUE	2	GO:0065004	protein-DNA complex assembly	BP	12	11	1.7	6.3	2.7	5e-09	9.2e-08	Mcm5, Mcm6, P32, Mcm3, Mcm2, Caf1-55, Mcm7, Iswi, M1BP, Set, Chrac-14	Nlp, pont, rept, MRG15
Fat	II	chorion	TRUE	2	GO:0042600	chorion	CC	16	14	2.3	6	2.6	1.2e-10	3.1e-09	Mur2B, CG15570, CG13114, Cp7Fb, CG13084, CG13083, psd, dec-1, Pxd, CG31928, Cp19, CG11381, Cp7Fc, Cp7Fa	Vml, Vm26Aa
Fat	II	DNA helicase activity	TRUE	2	GO:0003678	DNA helicase activity	MF	11	10	1.6	6.3	2.6	3.3e-08	3.8e-07	dpa, Mcm5, Mcm6, Mcm3, Mcm2, RfC4, Mcm7, Iswi, pont, rept	tst, me31B
Fat	II	fertilization	TRUE	3	GO:0009566	fertilization	BP	7	6	1	5.9	2.6	5.4e-05	0.00027	P32, Nlp, alphaTub67C, Iswi, Klp3A, polo	Nup153, Ndc1, Ote
Fat	II	chaperonin-containing T-complex	TRUE	2	GO:0005832	chaperonin-containing T-complex	CC	7	6	1	5.9	2.6	5.4e-05	0.00027	CCT5, CCT3, CCT1, CCT4, CCT8, CCT7	RpS5b, RnrL
Fat	II	chromatin remodeling	TRUE	1	GO:0006338	chromatin remodeling	BP	15	12	2.2	5.5	2.5	2e-08	2.7e-07	P32, Nlp, Snr1, Nup153, Caf1-55, Iswi, pont, rept, MRG15, Chrac-14, Fmr1, brm
Fat	II	DNA-dependent ATPase activity	TRUE	1	GO:0008094	DNA-dependent ATPase activity	MF	10	8	1.4	5.5	2.5	6e-06	3.9e-05	RfC38, RfC4, Iswi, pont, lds, Gnf1, rept, brm
Fat	II	nucleosome assembly	TRUE	4	GO:0006334	nucleosome assembly	BP	6	5	0.87	5.7	2.5	0.00033	0.0012	P32, Caf1-55, Iswi, Set, Chrac-14	Nlp, Fmr1, pont, rept, MRG15
Fat	II	egg coat formation	TRUE	6	GO:0035803	egg coat formation	BP	6	5	0.87	5.7	2.5	0.00033	0.0012	Vml, Cp36, psd, Vm34Ca, Vm26Aa	polo
Fat	II	structural constituent of chorion	TRUE	1	GO:0005213	structural constituent of chorion	MF	6	5	0.87	5.7	2.5	0.00033	0.0012	Cp38, Femcoat, Cp36, dec-1, Cp19
Fat	II	eggshell formation	TRUE	2	GO:0030703	eggshell formation	BP	24	18	3.5	5.2	2.4	2.6e-11	1.1e-09	Cp38, Mcm6, Vml, Cp7Fb, Femcoat, Cp36, psd, dec-1, Pxd, Pxt, Cp19, Caf1-55, Vm34Ca, Cp7Fc, PCNA, Vm26Aa, Syp, Cp7Fa
Fat	II	protein acetylation	TRUE	8	GO:0006473	protein acetylation	BP	9	7	1.3	5.4	2.4	3.4e-05	0.00018	Hat1, Caf1-55, pont, rept, MRG15, Chrac-14, brm	vig2, Slik, Uba2, Art8, Nmt
Fat	II	DNA recombination	TRUE	1	GO:0006310	DNA recombination	BP	8	6	1.2	5.2	2.4	0.00019	0.0008	Mcm5, piwi, RPA2, Su(var)2-10, Klp3A, mago
Fat	II	epidermis development	TRUE	10	GO:0008544	epidermis development	BP	8	6	1.2	5.2	2.4	0.00019	0.0008	Snr1, zip, cno, sn, tsr, Gli	mbc, twf
Fat	II	DNA metabolic process	TRUE	1	GO:0006259	DNA metabolic process	BP	28	20	4.1	4.9	2.3	8.1e-12	4.4e-10	dpa, Mcm5, piwi, Mcm6, Mcm3, RPA2, RfC38, RnrL, Mcm2, RfC4, Su(var)2-10, Caf1-55, Rrp1, mtSSB, Mcm7, PCNA, TFAM, Gnf1, Klp3A, mago
Fat	II	DNA packaging	TRUE	2	GO:0006323	DNA packaging	BP	15	11	2.2	5.1	2.3	3.8e-07	3.5e-06	Mcm5, P32, Nlp, Mcm2, RfC4, Su(var)2-10, Caf1-55, Iswi, Set, Chrac-14, Fmr1
Fat	II	SWI/SNF superfamily-type complex	TRUE	1	GO:0070603	SWI/SNF superfamily-type complex	CC	11	8	1.6	5	2.3	1.9e-05	0.00011	Snr1, Caf1-55, Iswi, pont, rept, Act42A, Chrac-14, brm
Fat	II	chromatin silencing	TRUE	4	GO:0006342	chromatin silencing	BP	10	7	1.4	4.8	2.3	0.0001	0.00047	piwi, vig2, Hat1, Caf1-55, rept, MRG15, Ibf2	Atx2, pcm, me31B, brm
Fat	II	cytoplasmic microtubule organization	TRUE	1	GO:0031122	cytoplasmic microtubule organization	BP	7	5	1	4.9	2.3	0.001	0.0032	gammaTub37C, CCT4, CCT8, CCT7, polo
Fat	II	chromosome separation	TRUE	3	GO:0051304	chromosome separation	BP	7	5	1	4.9	2.3	0.001	0.0032	Mcm5, Slik, MRG15, tws, vih	RfC4, Klp10A, RfC38
Fat	II	histone binding	TRUE	1	GO:0042393	histone binding	MF	7	5	1	4.9	2.3	0.001	0.0032	P32, Nlp, Caf1-55, MRG15, brm
Fat	II	eggshell chorion assembly	TRUE	1	GO:0007306	eggshell chorion assembly	BP	16	11	2.3	4.7	2.2	1.1e-06	8.2e-06	Cp38, Mcm6, Femcoat, Cp36, dec-1, Pxd, Pxt, Cp19, Caf1-55, PCNA, Syp
Fat	II	nuclear chromatin	TRUE	4	GO:0000790	nuclear chromatin	CC	9	6	1.3	4.6	2.2	0.0005	0.0018	Nup153, His2A:CG33853, Caf1-55, Iswi, pont, rept	Snr1, RPA2, piwi, B52, nclb
Fat	II	nucleoplasm part	TRUE	1	GO:0044451	nucleoplasm part	CC	25	16	3.6	4.4	2.1	1.4e-08	2e-07	Mcm5, Mcm6, Mcm3, Mcm2, Caf1-55, Mcm7, pont, Rpb5, SmB, B52, Cpsf100, rept, MRG15, Ns3, Chrac-14, CG6907
Fat	II	chromatin binding	TRUE	2	GO:0003682	chromatin binding	MF	16	10	2.3	4.3	2.1	1.2e-05	7.5e-05	Mcm5, Mcm6, Mcm3, Nup153, Mcm2, Caf1-55, Mcm7, Iswi, nclb, Ibf2	sn
Fat	II	DNA repair	TRUE	1	GO:0006281	DNA repair	BP	11	7	1.6	4.4	2.1	0.00024	0.00096	RPA2, RfC4, Su(var)2-10, Caf1-55, Rrp1, PCNA, Gnf1
Fat	II	positive regulation of cell proliferation	TRUE	4	GO:0008284	positive regulation of cell proliferation	BP	8	5	1.2	4.3	2.1	0.0024	0.0069	Caf1-55, RIOK2, Fmr1, rl, brm	Snr1, Hsp83, tws, polo, Adf1, Arp3
Fat	II	GTPase binding	TRUE	4	GO:0051020	GTPase binding	MF	8	5	1.2	4.3	2.1	0.0024	0.0069	cno, Ranbp21, Ranbp9, BicD, Gmap	Su(var)2-10, Uba2, Caf1-55, mats, rl
Fat	II	histone modification	TRUE	2	GO:0016570	histone modification	BP	19	11	2.8	4	2	1.2e-05	7.5e-05	vig2, Hat1, Caf1-55, Sirt2, pont, NO66, rept, MRG15, Art8, Chrac-14, brm	piwi
Fat	II	mitotic spindle organization	TRUE	1	GO:0007052	mitotic spindle organization	BP	16	9	2.3	3.9	2	0.00011	0.0005	dpa, Slik, CCT4, alphaTub67C, CCT8, PCNA, CCT7, Klp3A, Klp10A
Fat	II	protein polymerization	TRUE	1	GO:0051258	protein polymerization	BP	12	7	1.7	4	2	0.00051	0.0018	gammaTub37C, Atx2, tsr, Arp3, polo, twf, Jupiter
Fat	II	chromatin organization	TRUE	1	GO:0006325	chromatin organization	BP	40	21	5.8	3.6	1.9	1e-08	1.6e-07	piwi, vig2, Hat1, P32, Nlp, Snr1, Nup153, His2A:CG33853, Caf1-55, Sirt2, Iswi, pont, NO66, rept, MRG15, Art8, Set, Ibf2, Chrac-14, Fmr1, brm
Fat	II	chromosome organization	TRUE	1	GO:0051276	chromosome organization	BP	32	17	4.6	3.7	1.9	2.3e-07	2.2e-06	Mcm5, P32, Slik, Nlp, RfC38, Mcm2, RfC4, Su(var)2-10, Caf1-55, Iswi, MRG15, Klp10A, tws, Set, Chrac-14, Fmr1, vih
Fat	II	G2 DNA damage checkpoint	TRUE	22	GO:0031572	G2 DNA damage checkpoint	BP	17	9	2.5	3.7	1.9	0.0002	0.00083	Mcm3, Su(var)2-10, Mcm7, me31B, pont, Rpb5, rept, M1BP, CSN8	RfC4, brm, vih
Fat	II	negative regulation of cell development	TRUE	8	GO:0010721	negative regulation of cell development	BP	9	5	1.3	3.8	1.9	0.0047	0.012	Bruce, tws, Fmr1, polo, brm	zip, Snr1, Hsp83, lig
Fat	II	ovarian follicle cell development	TRUE	5	GO:0030707	ovarian follicle cell development	BP	61	30	8.8	3.4	1.8	4.3e-11	1.6e-09	Cp38, Mcm6, Vml, Cp7Fb, Femcoat, CCT1, Cp36, zip, psd, dec-1, Pxd, Pxt, Cp19, Caf1-55, Vm34Ca, Cp7Fc, me31B, PCNA, tsr, lig, Arp3, M1BP, Vm26Aa, Syp, nclb, mats, mbc, Gli, twf, Cp7Fa	sn
Fat	II	cell cycle phase transition	TRUE	4	GO:0044770	cell cycle phase transition	BP	26	13	3.8	3.4	1.8	1.6e-05	9.3e-05	Mcm3, Slik, Su(var)2-10, Mcm7, me31B, pont, Rpb5, rept, M1BP, tws, vih, brm, CSN8	Caf1-55, Klp3A, Fmr1, Bruce
Fat	II	mitotic cytokinesis	TRUE	3	GO:0000281	mitotic cytokinesis	BP	12	6	1.7	3.4	1.8	0.0038	0.01	Slik, zip, Caf1-55, tsr, Sep2, Act42A	Bruce, Klp3A, polo
Fat	II	oocyte dorsal/ventral axis specification	TRUE	3	GO:0007310	oocyte dorsal/ventral axis specification	BP	10	5	1.4	3.4	1.8	0.0083	0.02	tral, gammaTub37C, Syp, Fmr1, BicD	Vml, lig
Fat	II	regulation of apoptotic process	TRUE	6	GO:0042981	regulation of apoptotic process	BP	10	5	1.4	3.4	1.8	0.0083	0.02	RnrL, pcm, Bruce, Usp5, rl	mats, Atx2, rept, Fmr1, Atg2
Fat	II	meiotic chromosome segregation	TRUE	4	GO:0045132	meiotic chromosome segregation	BP	10	5	1.4	3.4	1.8	0.0083	0.02	Mcm5, gammaTub37C, RfC4, Klp3A, Gli	dhd, lds, Klp10A, polo
Fat	II	transcription factor binding	TRUE	2	GO:0008134	transcription factor binding	MF	10	5	1.4	3.4	1.8	0.0083	0.02	Iswi, pont, Ote, rl, Su(fu)	Fmr1, FASN1
Fat	II	DNA binding	TRUE	1	GO:0003677	DNA binding	MF	48	22	7	3.2	1.7	1.1e-07	1.2e-06	dpa, Mcm5, Mcm6, Mcm3, RPA2, RfC38, Nup153, Mcm2, His2A:CG33853, RfC4, Su(var)2-10, Rrp1, mtSSB, Mcm7, PCNA, Iswi, Rpb5, Gnf1, Adf1, M1BP, nclb, Ibf2
Fat	II	chromosomal part	TRUE	2	GO:0044427	chromosomal part	CC	40	19	5.8	3.3	1.7	4.3e-07	3.8e-06	piwi, vig2, RPA2, RfC38, Nup153, His2A:CG33853, RfC4, Su(var)2-10, Hsp83, Caf1-55, Iswi, pont, Gnf1, B52, Adf1, rept, nclb, Klp10A, polo	Snr1, mtSSB, TFAM
Fat	II	centrosome	TRUE	2	GO:0005813	centrosome	CC	17	8	2.5	3.2	1.7	0.0013	0.004	gammaTub37C, Nup153, Hsp83, TFAM, Klp10A, mats, polo, vih
Fat	II	cytoplasmic ribonucleoprotein granule	TRUE	2	GO:0036464	cytoplasmic ribonucleoprotein granule	CC	13	6	1.9	3.2	1.7	0.0061	0.016	exu, tral, pcm, me31B, lig, Fmr1	Syp
Fat	II	cellular protein-containing complex assembly	TRUE	2	GO:0034622	cellular protein-containing complex assembly	BP	65	28	9.4	3	1.6	9.5e-09	1.6e-07	Mcm5, Mcm6, P32, Mcm3, gammaTub37C, Mcm2, zip, Atx2, Hsp83, Caf1-55, pcm, Ndc1, Mcm7, me31B, Iswi, Usp5, tsr, CG1890, B52, Arp3, M1BP, Set, Chrac-14, polo, twf, Jupiter, rig, CSN8	Nlp, Fmr1
Fat	II	nucleoplasm	TRUE	1	GO:0005654	nucleoplasm	CC	49	22	7.1	3.1	1.6	1.7e-07	1.8e-06	Mcm5, piwi, Mcm6, Mcm3, Nlp, Mcm2, PIG-S, Su(var)2-10, Caf1-55, Mcm7, pont, tsr, Rpb5, SmB, B52, Cpsf100, rept, Ipk2, MRG15, Ns3, Chrac-14, CG6907
Fat	II	regulation of cell cycle	TRUE	1	GO:0051726	regulation of cell cycle	BP	43	19	6.2	3.1	1.6	1.8e-06	1.3e-05	Mcm3, Slik, zip, Su(var)2-10, Caf1-55, Mcm7, me31B, pont, Bruce, Rpb5, rept, M1BP, Klp3A, tws, Sep2, Fmr1, vih, brm, CSN8
Fat	II	cellular component assembly involved in morphogenesis	TRUE	1	GO:0010927	cellular component assembly involved in morphogenesis	BP	41	18	6	3	1.6	3.8e-06	2.6e-05	Zasp52, Cp38, Mcm6, Vml, Femcoat, Cp36, zip, psd, dec-1, Pxd, Pxt, Cp19, Caf1-55, Vm34Ca, PCNA, Vm26Aa, Syp, Fmr1
Fat	II	negative regulation of RNA biosynthetic process	TRUE	5	GO:1902679	negative regulation of RNA biosynthetic process	BP	22	10	3.2	3.1	1.6	0.00044	0.0016	piwi, vig2, Hat1, Caf1-55, Iswi, NO66, rept, Ote, MRG15, Ibf2	mago
Fat	II	nuclear chromosome segregation	TRUE	2	GO:0098813	nuclear chromosome segregation	BP	23	10	3.3	3	1.6	0.00068	0.0023	Mcm5, Slik, gammaTub37C, RfC38, RfC4, Klp3A, Klp10A, tws, Gli, vih	MRG15, mats
Fat	II	eye photoreceptor cell differentiation	TRUE	8	GO:0001754	eye photoreceptor cell differentiation	BP	14	6	2	2.9	1.6	0.0095	0.022	PIG-S, Atx2, Hsp83, Usp5, tsr, rl	Su(var)2-10, cno, CSN8
Fat	II	structural constituent of cytoskeleton	TRUE	6	GO:0005200	structural constituent of cytoskeleton	MF	14	6	2	2.9	1.6	0.0095	0.022	gammaTub37C, alphaTub67C, Arp3, betaTub56D, Act42A, Jupiter	Klp10A, polo, sn
Fat	II	oogenesis	TRUE	4	GO:0048477	oogenesis	BP	120	50	18	2.8	1.5	9.1e-14	2e-11	exu, piwi, Cp38, tral, Mcm6, Vml, yl, Cp7Fb, gammaTub37C, Femcoat, CCT1, Cp36, zip, psd, dec-1, Pxd, muskelin, Pxt, Atx2, Hsp83, Cp19, Caf1-55, Vm34Ca, sn, Cp7Fc, me31B, PCNA, Bruce, tsr, lig, Arp3, Ote, Pfdn2, M1BP, Vm26Aa, Syp, nclb, mats, Sep2, mago, mbc, Gli, Fmr1, polo, BicD, brm, twf, rig, CSN8, Cp7Fa	Nop60B, Iswi, SmB
Fat	II	protein-containing complex subunit organization	TRUE	1	GO:0043933	protein-containing complex subunit organization	BP	110	45	16	2.8	1.5	2.5e-12	1.8e-10	Mcm5, piwi, vig2, Hat1, Mcm6, P32, Mcm3, Nlp, gammaTub37C, Snr1, Nup153, Mcm2, His2A:CG33853, zip, Atx2, Hsp83, Caf1-55, pcm, Ndc1, Mcm7, Sirt2, me31B, Iswi, pont, Usp5, tsr, CG1890, NO66, B52, Arp3, rept, M1BP, MRG15, Art8, Klp10A, Set, Ibf2, Chrac-14, Fmr1, polo, brm, twf, Jupiter, rig, CSN8
Fat	II	mitotic cell cycle process	TRUE	2	GO:1903047	mitotic cell cycle process	BP	78	32	11	2.8	1.5	3.2e-09	7.1e-08	dpa, Mcm3, Slik, CCT4, zip, RfC4, alphaTub67C, Su(var)2-10, Caf1-55, cno, Mcm7, me31B, CCT8, PCNA, pont, tsr, CCT7, Rpb5, B52, rept, M1BP, CG3436, Klp3A, Klp10A, tws, Sep2, Act42A, polo, vih, rl, brm, CSN8	PpD3, Fmr1
Fat	II	regulation of RNA biosynthetic process	TRUE	3	GO:2001141	regulation of RNA biosynthetic process	BP	52	22	7.6	2.9	1.5	6.3e-07	5.1e-06	piwi, vig2, Hat1, Snr1, Nup153, Uba2, Hsp83, Caf1-55, Iswi, TFAM, NO66, lig, B52, Adf1, rept, Ote, MRG15, Ibf2, rl, brm, Su(fu), CG6907
Fat	II	cellular response to DNA damage stimulus	TRUE	1	GO:0006974	cellular response to DNA damage stimulus	BP	46	19	6.7	2.8	1.5	6e-06	3.9e-05	Mcm3, RPA2, RfC4, dhd, Su(var)2-10, Caf1-55, Rrp1, Mcm7, me31B, PCNA, pont, Rpb5, Rpn2, Gnf1, rept, M1BP, Chrac-14, rl, CSN8
Fat	II	negative regulation of macromolecule biosynthetic process	TRUE	9	GO:0010558	negative regulation of macromolecule biosynthetic process	BP	31	13	4.5	2.9	1.5	0.00016	0.00071	piwi, vig2, Hat1, Atx2, Caf1-55, me31B, Iswi, NO66, rept, Ote, MRG15, Ibf2, Fmr1	pcm, Usp5, mago
Fat	II	unfolded protein binding	TRUE	2	GO:0051082	unfolded protein binding	MF	25	10	3.6	2.8	1.5	0.0015	0.0046	CCT5, CCT3, CCT1, CCT4, Hsp83, Hsp60A, CCT8, CCT7, Pfdn2, DnaJ-1	Hsp26, CG1890, Hsp27
Fat	II	positive regulation of RNA biosynthetic process	TRUE	10	GO:1902680	positive regulation of RNA biosynthetic process	BP	17	7	2.5	2.8	1.5	0.0066	0.016	Snr1, Nup153, Iswi, TFAM, lig, Adf1, brm	Atx2, tyf, pont, piwi
Fat	II	positive regulation of protein phosphorylation	TRUE	8	GO:0001934	positive regulation of protein phosphorylation	BP	12	5	1.7	2.9	1.5	0.02	0.044	Slik, M1BP, mago, rl, Fnta	cno, mbc, Ipk2
Fat	II	cell cycle process	TRUE	2	GO:0022402	cell cycle process	BP	120	46	17	2.7	1.4	2.4e-12	1.8e-10	dpa, Mcm5, Mcm6, Mcm3, Slik, gammaTub37C, RfC38, Nup153, Mcm2, CCT4, zip, RfC4, dhd, alphaTub67C, Su(var)2-10, Hsp83, Caf1-55, cno, Mcm7, me31B, CCT8, PCNA, pont, Bruce, lds, tsr, CCT7, Rpb5, B52, Arp3, betaTub56D, rept, M1BP, CG3436, MRG15, Klp3A, Klp10A, tws, Sep2, Act42A, Gli, polo, vih, rl, brm, CSN8	PpD3, Fmr1
Fat	II	nuclear lumen	TRUE	1	GO:0031981	nuclear lumen	CC	81	30	12	2.5	1.4	1.8e-07	1.8e-06	Mcm5, piwi, Mcm6, Mcm3, Nlp, Snr1, RPA2, Nup153, Mcm2, His2A:CG33853, PIG-S, Su(var)2-10, Caf1-55, Mcm7, Nop60B, Iswi, pont, tsr, Rpb5, SmB, Rrp42, B52, Cpsf100, rept, Ote, Ipk2, MRG15, Ns3, Chrac-14, CG6907
Fat	II	transferase complex	TRUE	2	GO:1990234	transferase complex	CC	21	8	3	2.6	1.4	0.0064	0.016	Caf1-55, pont, Rpb5, rept, MRG15, Chrac-14, vih, Fnta	RnrL, PIG-S, Uba2, Rpn2, tws
Fat	II	cellular response to starvation	TRUE	7	GO:0009267	cellular response to starvation	BP	18	7	2.6	2.7	1.4	0.0094	0.022	pcm, RIOK2, Nop60B, Bruce, Ns3, Atg2, rl	whd, Hsp27, zip
Fat	II	MAPK cascade	TRUE	10	GO:0000165	MAPK cascade	BP	16	6	2.3	2.6	1.4	0.02	0.042	cno, Usp5, M1BP, mago, rl, Fnta	Slik, RIOK2, polo
Fat	II	microtubule cytoskeleton	TRUE	3	GO:0015630	microtubule cytoskeleton	CC	130	46	18	2.5	1.3	1.1e-10	3.1e-09	tral, Slik, RpS5b, CCT5, gammaTub37C, CCT3, CCT1, RfC38, Nup153, CCT4, RfC4, alphaTub67C, Pxt, Hsp83, Hsp26, CG14100, CG9135, Mcm7, Hsp60A, me31B, CCT8, PCNA, pont, r-l, tsr, CCT7, TFAM, CG3226, Gnf1, betaTub56D, rept, Hsp27, Klp3A, Klp10A, mats, tws, CG18190, Sep2, CG8778, Act42A, polo, CG11905, vih, Jupiter, DnaJ-1, Uch	Zasp52, zip, sn, Arp3
Fat	II	microtubule associated complex	TRUE	1	GO:0005875	microtubule associated complex	CC	110	37	15	2.4	1.3	3.3e-08	3.8e-07	tral, RpS5b, CCT5, gammaTub37C, CCT3, CCT1, RfC38, CCT4, RfC4, Pxt, Hsp26, CG14100, CG9135, Mcm7, Hsp60A, me31B, CCT8, PCNA, pont, r-l, tsr, CCT7, CG3226, Gnf1, rept, Hsp27, Klp3A, Klp10A, tws, CG18190, Sep2, CG8778, Act42A, CG11905, Jupiter, DnaJ-1, Uch
Fat	II	ATP binding	TRUE	3	GO:0005524	ATP binding	MF	110	37	15	2.4	1.3	3.3e-08	3.8e-07	dpa, Mcm5, Mcm6, Mcm3, Slik, CCT5, CCT3, tst, CCT1, CG3262, RnrL, Mcm2, CCT4, zip, RfC4, Hsp83, Mcm7, AsnRS, RIOK2, Mccc1, GlyRS, Hsp60A, me31B, CCT8, Iswi, pont, lds, CCT7, Gnf1, Arp3, rept, Klp3A, Klp10A, pch2, polo, rl, brm
Fat	II	positive regulation of macromolecule metabolic process	TRUE	3	GO:0010604	positive regulation of macromolecule metabolic process	BP	49	17	7.1	2.4	1.3	0.00026	0.001	piwi, Slik, Snr1, RnrL, Nup153, Atx2, tyf, Iswi, pont, TFAM, lig, Adf1, M1BP, mago, rl, brm, Fnta
Fat	II	regulation of transcription by RNA polymerase II	TRUE	2	GO:0006357	regulation of transcription by RNA polymerase II	BP	31	11	4.5	2.4	1.3	0.0027	0.0077	Snr1, Nup153, Hsp83, Caf1-55, Iswi, B52, Adf1, Ote, rl, brm, CG6907	lds, Rpb5, M1BP
Fat	II	regulation of cell development	TRUE	2	GO:0060284	regulation of cell development	BP	28	10	4.1	2.5	1.3	0.004	0.011	exu, RIOK2, Bruce, Adf1, tws, mago, Fmr1, polo, rl, brm	zip
Fat	II	cellular component assembly	TRUE	1	GO:0022607	cellular component assembly	BP	160	54	24	2.3	1.2	1.3e-10	3.1e-09	exu, Mcm5, Zasp52, Cp38, Mcm6, Vml, P32, Mcm3, Nlp, gammaTub37C, Femcoat, Mcm2, Cp36, zip, psd, dec-1, Pxd, alphaTub67C, Pxt, Atx2, Hsp83, Cp19, Caf1-55, Vm34Ca, pcm, Ndc1, Mcm7, Tsf2, sn, me31B, PCNA, Iswi, pont, Usp5, tsr, CG1890, B52, Adf1, Arp3, M1BP, Vm26Aa, Syp, Klp10A, tws, Set, mago, Gli, Chrac-14, Fmr1, polo, twf, Jupiter, rig, CSN8
Fat	II	cellular response to stress	TRUE	1	GO:0033554	cellular response to stress	BP	87	30	13	2.4	1.2	1.1e-06	8.2e-06	Mcm3, Cbs, RPA2, RfC4, dhd, Su(var)2-10, Caf1-55, Rrp1, pcm, cno, Mcm7, RIOK2, Hsp60A, me31B, PCNA, Nop60B, pont, Bruce, Usp5, Rpb5, Rpn2, Gnf1, rept, M1BP, Ns3, Chrac-14, shep, Atg2, rl, CSN8
Fat	II	microtubule cytoskeleton organization	TRUE	2	GO:0000226	microtubule cytoskeleton organization	BP	64	21	9.3	2.3	1.2	0.00012	0.00054	tral, Slik, gammaTub37C, Nup153, CCT4, alphaTub67C, Hsp83, cno, CCT8, pont, lds, CCT7, betaTub56D, Klp3A, Klp10A, tws, mago, Fmr1, polo, BicD, Jupiter
Fat	II	axis specification	TRUE	1	GO:0009798	axis specification	BP	36	12	5.2	2.3	1.2	0.0032	0.009	exu, tral, Vml, gammaTub37C, zip, Hsp83, lig, Syp, mago, Fmr1, BicD, rl
Fat	II	regulation of intracellular signal transduction	TRUE	2	GO:1902531	regulation of intracellular signal transduction	BP	32	11	4.6	2.4	1.2	0.0036	0.0099	P32, Su(var)2-10, cno, Usp5, lig, Ipk2, M1BP, mago, Atg2, rl, Fnta	mbc, brm
Fat	II	embryonic development via the syncytial blastoderm	TRUE	2	GO:0001700	embryonic development via the syncytial blastoderm	BP	29	10	4.2	2.4	1.2	0.0054	0.014	Npc1b, exu, Snr1, zip, pcm, Nmt, cno, Arp3, tws, mbc	alphaTub67C
Fat	II	dendrite morphogenesis	TRUE	8	GO:0048813	dendrite morphogenesis	BP	28	9	4.1	2.2	1.2	0.014	0.031	Snr1, Caf1-55, Sirt2, GlyRS, Iswi, Gnf1, Adf1, Fmr1, brm	Fas1, tsr, Arp3, sn, Usp5
Fat	II	positive regulation of protein metabolic process	TRUE	2	GO:0051247	positive regulation of protein metabolic process	BP	24	8	3.5	2.3	1.2	0.016	0.035	Slik, RnrL, Atx2, tyf, M1BP, mago, rl, Fnta
Fat	II	chromosomal region	TRUE	2	GO:0098687	chromosomal region	CC	21	7	3	2.3	1.2	0.023	0.049	piwi, vig2, Su(var)2-10, Hsp83, Adf1, Klp10A, polo	Caf1-55, Iswi, B52
Fat	II	anatomical structure formation involved in morphogenesis	TRUE	1	GO:0048646	anatomical structure formation involved in morphogenesis	BP	97	30	14	2.1	1.1	1.4e-05	8.4e-05	piwi, Zasp52, Cp38, Mcm6, Vml, Cp7Fb, Femcoat, Cp36, zip, psd, dec-1, Pxd, Pxt, Cp19, Caf1-55, Vm34Ca, Cp7Fc, me31B, PCNA, Bruce, Arp3, Vm26Aa, Syp, nclb, Sep2, mbc, Fmr1, BicD, rig, Cp7Fa
Fat	II	regionalization	TRUE	2	GO:0003002	regionalization	BP	63	19	9.1	2.1	1.1	0.00087	0.0029	exu, tral, Vml, gammaTub37C, Snr1, zip, Hsp83, Caf1-55, sn, tsr, lig, Syp, tws, mago, Gli, Fmr1, BicD, rl, brm	cno
Fat	II	nuclear division	TRUE	2	GO:0000280	nuclear division	BP	56	17	8.1	2.1	1.1	0.0015	0.0046	Mcm5, Slik, gammaTub37C, RfC4, dhd, alphaTub67C, pont, lds, B52, CG3436, Klp3A, Klp10A, tws, Gli, polo, vih, rl
Fat	II	organelle assembly	TRUE	1	GO:0070925	organelle assembly	BP	44	14	6.4	2.2	1.1	0.0024	0.007	Zasp52, P32, Nlp, gammaTub37C, zip, alphaTub67C, pcm, me31B, Iswi, pont, Klp10A, tws, Fmr1, polo
Fat	II	cell division	TRUE	1	GO:0051301	cell division	BP	41	13	6	2.2	1.1	0.0036	0.0099	piwi, Slik, zip, alphaTub67C, Caf1-55, Bruce, tsr, Ote, Klp3A, tws, Sep2, Act42A, polo
Fat	II	purine ribonucleoside triphosphate binding	TRUE	9	GO:0035639	purine ribonucleoside triphosphate binding	MF	140	43	21	2	1	5.1e-07	4.3e-06	dpa, Mcm5, Mcm6, Mcm3, Slik, CCT5, gammaTub37C, CCT3, tst, CCT1, CG3262, RnrL, Mcm2, CCT4, zip, RfC4, alphaTub67C, Hsp83, Mcm7, AsnRS, RIOK2, Mccc1, GlyRS, Hsp60A, me31B, CCT8, Iswi, pont, lds, CCT7, Gnf1, Arp3, betaTub56D, rept, Klp3A, Klp10A, Ns3, Sep2, pch2, polo, rl, brm, CG6195	Mur2B, CG1218, Cda5
Fat	II	organelle lumen	TRUE	3	GO:0043233	organelle lumen	CC	140	40	20	2	1	2.7e-06	1.9e-05	Mcm5, piwi, Mcm6, P32, Mcm3, Nlp, Snr1, CG31075, Gabat, RPA2, Nup153, Mcm2, His2A:CG33853, PIG-S, mRpL44, Su(var)2-10, Caf1-55, mtSSB, Mcm7, Mccc1, Hsp60A, Nop60B, Iswi, pont, tsr, mRpL11, Rpb5, SmB, Rrp42, B52, Cpsf100, rept, Ote, Ipk2, MRG15, Ns3, Chrac-14, CG6907, mRpL10, mRpS11
Fat	II	regulation of cellular component organization	TRUE	1	GO:0051128	regulation of cellular component organization	BP	86	25	12	2	1	0.00025	0.00096	exu, piwi, vig2, Slik, PIG-S, zip, Atx2, Hsp83, pcm, cno, Usp5, tsr, B52, Adf1, Arp3, Klp3A, tws, Herc4, Ibf2, mago, Fmr1, BicD, vih, twf, Jupiter
Fat	II	ATPase activity, coupled	TRUE	2	GO:0042623	ATPase activity, coupled	MF	71	21	10	2	1	0.00062	0.0021	CCT5, Nlp, CCT3, RfC38, CCT4, zip, RfC4, Hsp83, Caf1-55, me31B, CCT8, Iswi, pont, lds, CCT7, Gnf1, rept, Vha16-1, Chrac-14, brm, ATP7	Klp3A, Klp10A
Fat	II	embryo development	TRUE	1	GO:0009790	embryo development	BP	61	18	8.8	2	1	0.0016	0.0047	Npc1b, exu, Snr1, zip, alphaTub67C, Hsp83, pcm, Nmt, cno, sn, Arp3, tws, mago, mbc, Fmr1, polo, BicD, rl
Fat	II	regulation of organelle organization	TRUE	1	GO:0033043	regulation of organelle organization	BP	30	9	4.4	2.1	1	0.022	0.046	Slik, Atx2, pcm, Arp3, Klp3A, tws, vih, twf, Jupiter
Fat	II	nucleoside-triphosphatase activity	TRUE	4	GO:0017111	nucleoside-triphosphatase activity	MF	120	35	18	2	0.98	1.7e-05	9.3e-05	dpa, Mcm5, Mcm6, Mcm3, CCT5, Nlp, gammaTub37C, CCT3, tst, RfC38, Mcm2, CCT4, zip, RfC4, alphaTub67C, Hsp83, Caf1-55, Mcm7, me31B, CCT8, Iswi, pont, lds, CCT7, Gnf1, betaTub56D, rept, Klp3A, Vha16-1, Klp10A, Ns3, Sep2, Chrac-14, brm, ATP7	dUTPase
Fat	II	cellular component morphogenesis	TRUE	1	GO:0032989	cellular component morphogenesis	BP	120	34	18	1.9	0.95	3.6e-05	0.00019	Zasp52, Cp38, Mcm6, Vml, Slik, Femcoat, Snr1, Cp36, zip, psd, dec-1, Pxd, Fas1, Pxt, Hsp83, Cp19, Caf1-55, Vm34Ca, cno, Sirt2, sn, GlyRS, PCNA, Iswi, Usp5, tsr, Gnf1, Adf1, Arp3, Vm26Aa, Syp, mbc, Fmr1, brm
Fat	II	wing disc morphogenesis	TRUE	16	GO:0007472	wing disc morphogenesis	BP	40	11	5.8	1.9	0.92	0.022	0.047	Snr1, zip, pcm, sn, tsr, Hsp27, Vha16-1, Gli, rl, brm, CSN8	Lcp3, rept, Atg2, shep, Nop60B, CG30069, CCT3
Fat	II	cytoskeleton organization	TRUE	1	GO:0007010	cytoskeleton organization	BP	110	30	16	1.9	0.91	0.0002	0.00083	Zasp52, tral, Slik, gammaTub37C, Nup153, CCT4, zip, alphaTub67C, Atx2, Hsp83, cno, sn, CCT8, pont, lds, tsr, CCT7, Arp3, betaTub56D, Klp3A, Klp10A, tws, Act42A, mago, mbc, Fmr1, polo, BicD, twf, Jupiter
Fat	II	imaginal disc development	TRUE	2	GO:0007444	imaginal disc development	BP	76	20	11	1.8	0.86	0.004	0.011	Snr1, zip, Su(var)2-10, pcm, sn, Nop60B, tsr, lig, rept, Ipk2, Hsp27, Vha16-1, tws, Sep2, Gli, Fmr1, rl, brm, CG30069, CSN8	CCT3, mbc, polo
Fat	II	cell proliferation	TRUE	1	GO:0008283	cell proliferation	BP	54	14	7.8	1.8	0.84	0.018	0.039	Slik, Snr1, Mcm2, zip, Hsp83, Caf1-55, cno, RIOK2, mats, tws, Fmr1, polo, rl, brm
Fat	II	RNA processing	TRUE	1	GO:0006396	RNA processing	BP	58	15	8.4	1.8	0.83	0.015	0.033	exu, tst, CG5220, mRpL44, CG14100, Nop60B, SmB, Rrp42, B52, Cpsf100, CG3436, mub, Syp, mago, rig
Fat	II	post-embryonic animal organ development	TRUE	2	GO:0048569	post-embryonic animal organ development	BP	56	14	8.1	1.7	0.78	0.024	0.05	Snr1, zip, pcm, sn, GlyRS, tsr, rept, Hsp27, Vha16-1, mbc, Gli, rl, brm, CSN8	Lcp3, Atg2, ATP7
Fat	II	regulation of signal transduction	TRUE	4	GO:0009966	regulation of signal transduction	BP	77	19	11	1.7	0.77	0.011	0.024	P32, Su(var)2-10, Uba2, cno, Usp5, lig, Arp3, Ote, Ipk2, M1BP, Herc4, mago, RanBP3, Fmr1, Atg2, rl, brm, Su(fu), Fnta	RIOK2, BicD, Hat1, Atx2, me31B
Fat	III	plasma membrane proton-transporting V-type ATPase complex	TRUE	18	GO:0033181	plasma membrane proton-transporting V-type ATPase complex	CC	8	7	1.6	4.3	2.1	8.5e-05	0.0043	Vha68-2, Vha100-2, VhaAC45, Vha44, Vha36-1, VhaSFD, VhaAC39-1	Vha100-5, Picot, RyR, Sec61alpha, nrv1
Fat	III	apical plasma membrane	TRUE	3	GO:0016324	apical plasma membrane	CC	6	5	1.2	4.1	2	0.0016	0.037	scb, aPKC, Inx2, mgl, mew	Fim, ck, cher, SH3PX1
Fat	III	proton-transporting V-type ATPase, V1 domain	TRUE	2	GO:0033180	proton-transporting V-type ATPase, V1 domain	CC	6	5	1.2	4.1	2	0.0016	0.037	Vha68-2, VhaAC45, Vha44, Vha36-1, VhaSFD
Fat	III	alpha-glucosidase activity	TRUE	5	GO:0090599	alpha-glucosidase activity	MF	6	5	1.2	4.1	2	0.0016	0.037	Mal-A8, Mal-A1, Mal-A2, Mal-A7, tobi	Amy-d, Ect3, CG13397, CG16965
Fat	III	nuclear pore	TRUE	2	GO:0005643	nuclear pore	CC	14	10	2.8	3.5	1.8	4.5e-05	0.0035	Nup58, Gp210, Nup98-96, Sec13, Nup37, CG8086, Nup133, Nup54, Nup188, Nup50	CG7655, sbr
Fat	III	plasma membrane protein complex	TRUE	1	GO:0098797	plasma membrane protein complex	CC	37	21	7.5	2.8	1.5	7.4e-07	0.0001	CG4562, CG3397, scb, CG7627, Vha68-2, Vha100-2, nrv1, CG31793, CG5789, CG9990, VhaAC45, AP-2alpha, CG31689, Vha44, Vha36-1, Dys, norpA, VhaSFD, VhaAC39-1, mew, AP-1-2beta
Fat	III	vacuolar membrane	TRUE	2	GO:0005774	vacuolar membrane	CC	14	8	2.8	2.8	1.5	0.0024	0.041	Vha100-5, Vha68-2, Vha100-2, Vha44, Vps29, Vha36-1, VhaSFD, VhaAC39-1	car
Fat	III	nucleolus	TRUE	1	GO:0005730	nucleolus	CC	19	10	3.8	2.6	1.4	0.0016	0.037	CG11109, Nop56, hoip, Non3, RpI1, CG11583, Top1, CG4038, CG8545, CG13097
Fat	III	olfactory behavior	TRUE	2	GO:0042048	olfactory behavior	BP	20	10	4	2.5	1.3	0.0026	0.041	Obp56a, Obp56d, scb, Gp210, futsch, gry, gish, Inx2, cher, dnc	Ih
Fat	III	plasma membrane part	TRUE	1	GO:0044459	plasma membrane part	CC	61	29	12	2.4	1.2	8.4e-07	0.0001	CG4562, sdk, CG3397, scb, CG7627, Vha68-2, Nrx-IV, Vha100-2, nrv1, CG31793, CG5789, CG9990, VhaAC45, AP-2alpha, CG31689, Vha44, Vha36-1, aPKC, Dys, Inx2, hts, norpA, SH3PX1, mgl, VhaSFD, cni, VhaAC39-1, mew, AP-1-2beta
Fat	III	monovalent inorganic cation transport	TRUE	2	GO:0015672	monovalent inorganic cation transport	BP	23	11	4.6	2.4	1.2	0.0025	0.041	Vha100-5, Ih, CG3397, Vha68-2, Vha100-2, nrv1, VhaAC45, Vha44, Vha36-1, VhaSFD, VhaAC39-1	RyR, Sec61alpha
Fat	III	ATPase activity, coupled to movement of substances	TRUE	5	GO:0043492	ATPase activity, coupled to movement of substances	MF	38	16	7.7	2.1	1.1	0.0015	0.037	CG4562, Vha100-5, MRP, CG7627, Vha68-2, Vha100-2, nrv1, CG31793, CG5789, CG9990, VhaAC45, CG31689, Vha44, Vha36-1, VhaSFD, VhaAC39-1	CG2930, Picot, CG7720, CG42235
Fat	III	active ion transmembrane transporter activity	TRUE	4	GO:0022853	active ion transmembrane transporter activity	MF	27	12	5.4	2.2	1.1	0.0034	0.048	Vha100-5, Picot, Vha68-2, Vha100-2, nrv1, VhaAC45, CG7720, Vha44, Vha36-1, VhaSFD, CG42235, VhaAC39-1	Ih, RyR
Fat	III	chitin-based cuticle development	TRUE	2	GO:0040003	chitin-based cuticle development	BP	37	15	7.5	2	1	0.0033	0.048	Cpr65Au, Lcp65Ab1, Dhc64C, Sec13, Cpr66D, Cpr62Bb, ttk, Cpr47Ec, Cpr47Ee, Cpr30B, mgl, ck, SrpRbeta, Lcp65Ag3, Cpr56F	frm, Sec61alpha
Fat	III	transmembrane transport	TRUE	1	GO:0055085	transmembrane transport	BP	62	24	13	1.9	0.94	0.00046	0.019	CG4562, Vha100-5, Picot, MRP, Ih, CG10420, ClC-c, CG7627, Vha68-2, RyR, Vha100-2, CG31793, CG6484, CG5789, VhaAC45, CG7720, Vha44, Vha36-1, VhaSFD, Sec61alpha, CG42235, VhaAC39-1, mfrn, Tpc1
Fat	III	plasma membrane	TRUE	1	GO:0005886	plasma membrane	CC	120	43	25	1.7	0.78	5.7e-05	0.0035	CG4562, Argk, MRP, Ih, sdk, CG3397, uzip, scb, LpR2, CG7627, Vha68-2, Nrx-IV, Vha100-2, nrv1, CG31793, Hem, CG5789, gish, Sod3, CG9990, TM9SF2, VhaAC45, AP-2alpha, CG31689, Vha44, Vha36-1, aPKC, Dys, Inx2, hts, norpA, SH3PX1, mgl, VhaSFD, vimar, Ank, cni, VhaAC39-1, mfas, raw, CG31195, mew, AP-1-2beta
Fat	III	cell projection organization	TRUE	1	GO:0030030	cell projection organization	BP	84	28	17	1.6	0.72	0.0025	0.041	Myo61F, Dhc64C, uzip, scb, Nup58, LpR2, futsch, tok, Eip71CD, ttk, Hem, flr, CG2691, fs(1)h, aPKC, hts, SH3PX1, chb, Sec61alpha, ck, cher, dnc, betaTub60D, CG4829, mfas, shot, SMC1, mew
Fat	III	transporter activity	TRUE	1	GO:0005215	transporter activity	MF	130	39	25	1.5	0.62	0.0018	0.038	CG4562, Vha100-5, CG2930, Picot, MRP, AP-1gamma, Ih, cv-d, ClC-c, Nup58, CG7627, Nup98-96, Vha68-2, RyR, Vha100-2, nrv1, CG31793, Nup133, CG6484, CG5789, CG9990, VhaAC45, AP-2alpha, CG7720, CG31689, Vha44, Nup54, CG3394, Vps29, Vha36-1, Inx2, VhaSFD, Sec61alpha, CG42235, VhaAC39-1, mfrn, Mpcp1, Tpc1, AP-1-2beta
Fat	IV	extracellular space	TRUE	1	GO:0005615	extracellular space	CC	57	37	21	1.8	0.83	7.8e-06	0.0032	PPO2, CG17271, Hexo2, Npc2h, ImpL2, CG2918, CG11852, CG31207, CG5162, Spn43Ab, CG15201, CG5867, CG6426, Acer, ltl, CG3662, Ance, CG17189, CG17919, CG5945, CG18135, TotA, Fkbp14, Est-6, CG2650, nec, CG18067, Tep4, TotM, ssp7, Spn77Ba, Gp93, apolpp, Phk-3, Spn55B, Spn88Ea, CG16820
Fat	IV	peptide biosynthetic process	TRUE	4	GO:0043043	peptide biosynthetic process	BP	110	60	40	1.5	0.6	2.9e-05	0.0059	CG4306, RpS27, RpL34b, RpS15Ab, RpL37a, SPE, AGO2, RpS19a, RpS28b, RpS13, RpL23, mRpS24, RpL12, mxt, mRpS21, eIF3b, eIF3j, RpL36, mRpL40, eIF3f1, mRpS23, AspRS, eIF3l, RpL35A, Dp1, RpS27A, cact, mRpS5, psh, Irp-1B, mRpS33, mRpL9, mRpS14, Gss2, RpS3, CG7414, RpS3A, mRpS29, RpL7A, RpL4, eIF4G1, GluProRS, eIF5, RpL8, RpL15, CG10602, mRpS22, Gclc, CG17514, Dredd, CG4679, Rcd-1, bonsai, CG31957, RpS6,…	Spp, CG33178, Spase22-23, Ass
Fat	IV	lipid localization	TRUE	1	GO:0010876	lipid localization	BP	25	19	9.1	2.1	1.1	5.6e-05	0.0074	Npc2h, ImpL2, Npc2g, ScpX, Pmp70, CdsA, Lsd-1, gammaCOP, Mtp, betaCOP, Arf79F, SERCA, CG2316, apolpp, Acsl, Su(dx), beta'COP, foxo, alphaCOP
Fat	IV	defense response	TRUE	1	GO:0006952	defense response	BP	61	37	22	1.7	0.74	7.3e-05	0.0074	CG4306, PPO2, CG2736, Hml, Npc2h, Glt, NimB2, Npc2g, PGRP-SB1, emp, krz, SPE, IM23, AGO2, GlyP, Tsf1, GNBP3, Sp7, CanA1, CG14722, nec, Tep4, Hf, MP1, cact, betaCOP, psh, TotM, Spn77Ba, Eb1, fon, CalpA, Dredd, CG13890, casp, Dcr-2, Rm62
Fat	IV	mitochondrial inner membrane	TRUE	4	GO:0005743	mitochondrial inner membrane	CC	43	28	16	1.8	0.84	9.9e-05	0.0076	CG1907, Cyt-c1, ATPsynF, UQCR-Q, ATPsynO, ND-B18, COX6B, aralar1, Bmcp, ND-B17.2, CG5903, Tim17b, ND-B15, Gpo1, ND-15, UQCR-14, ATPsynG, ND-51, Ucp4A, Cchl, Adck, ND-MLRQ, ND-49, CG1824, sesB, CG32174, SdhA, SdhB	Tspo, CG17996, koi
Fat	IV	regulation of lipid storage	TRUE	3	GO:0010883	regulation of lipid storage	BP	12	11	4.4	2.5	1.3	0.00011	0.0076	ImpL2, CdsA, Lsd-1, gammaCOP, betaCOP, Arf79F, SERCA, Acsl, beta'COP, foxo, alphaCOP	Su(dx), Tapdelta, SPoCk, cact, Pax
Fat	IV	response to other organism	TRUE	3	GO:0051707	response to other organism	BP	57	34	21	1.6	0.71	0.00023	0.013	PPO2, mbo, Glt, NimB2, Obp99c, SPE, IM23, AGO2, GlyP, Tsf1, GNBP3, Ance, CRIF, CG17919, CG16756, TotA, CG14722, nec, Tep4, MP1, cact, EbpIII, betaCOP, psh, TotM, IM33, Phk-3, CalpA, Dredd, CG13890, casp, foxo, Dcr-2, Rm62	Herp
Fat	IV	inner mitochondrial membrane protein complex	TRUE	3	GO:0098800	inner mitochondrial membrane protein complex	CC	25	18	9.1	2	0.98	0.00029	0.014	Cyt-c1, ATPsynF, UQCR-Q, ATPsynO, ND-B18, COX6B, ND-B17.2, CG5903, Tim17b, ND-B15, ND-15, UQCR-14, ATPsynG, ND-51, ND-MLRQ, ND-49, SdhA, SdhB	Nc73EF, CG3626
Fat	IV	ribosomal subunit	TRUE	3	GO:0044391	ribosomal subunit	CC	52	31	19	1.6	0.71	0.00045	0.02	RpS27, RpL34b, RpS15Ab, RpL37a, RpS19a, RpS28b, RpS13, RpL23, mRpS24, RpL12, mRpS21, RpL36, mRpL40, mRpS23, RpL35A, RpS27A, mRpS5, mRpS33, mRpL9, mRpS14, RpS3, RpS3A, mRpS29, RpL7A, RpL4, RpL8, RpL15, mRpS22, bonsai, RpS6, tko	CG10602
Fat	IV	immune response	TRUE	1	GO:0006955	immune response	BP	46	28	17	1.7	0.74	0.00053	0.02	CG4306, PPO2, Hml, Npc2h, mbo, Npc2g, PGRP-SB1, SPE, IM23, GlyP, GNBP3, CG16756, Sp7, CanA1, nec, Tep4, Hf, MP1, cact, betaCOP, psh, Spn77Ba, Eb1, fon, Dredd, RpS6, casp, Rm62
Fat	IV	extracellular region part	TRUE	1	GO:0044421	extracellular region part	CC	100	54	38	1.4	0.51	0.00058	0.02	PPO2, CG17271, Hexo2, Npc2h, ImpL2, Glt, CG2918, CG11852, CG31207, CG5162, Spn43Ab, CG15201, Cpr76Bd, CG34461, CG5867, CG6426, Acer, Tig, ltl, CG3662, Ance, CG17189, CG17919, 14-3-3zeta, CG5945, CG18135, Cpr60D, TotA, Fkbp14, Est-6, vkg, CG2650, nec, CG18067, CG6656, Tep4, Lpin, CG3534, Galphas, TotM, ssp7, Spn77Ba, Mipp1, cindr, Gp93, Ccp84Ae, Ccp84Ag, apolpp, Phk-3, Spn55B, Lcp9, Cpr49Aa, Spn88…
Fat	IV	ATP metabolic process	TRUE	19	GO:0046034	ATP metabolic process	BP	28	19	10	1.9	0.9	0.00064	0.02	Adk1, Cyt-c1, Tspo, UQCR-Q, ATPsynO, ND-B18, Pglym78, ND-B17.2, ND-B15, CG32649, Pgi, ND-15, UQCR-14, ATPsynG, ND-51, ND-MLRQ, ND-49, sesB, SdhB	fbl, Galphas, foxo, Mtap, Sardh, CG8891
Fat	IV	small ribosomal subunit	TRUE	1	GO:0015935	small ribosomal subunit	CC	28	19	10	1.9	0.9	0.00064	0.02	RpS27, RpS15Ab, RpS19a, RpS28b, RpS13, mRpS24, mRpS21, mRpS23, RpS27A, mRpS5, mRpS33, mRpS14, RpS3, RpS3A, mRpS29, mRpS22, bonsai, RpS6, tko
Fat	IV	translation	TRUE	1	GO:0006412	translation	BP	100	52	37	1.4	0.5	0.00096	0.028	RpS27, RpL34b, RpS15Ab, RpL37a, AGO2, RpS19a, RpS28b, RpS13, RpL23, mRpS24, RpL12, mxt, mRpS21, eIF3b, eIF3j, RpL36, mRpL40, eIF3f1, mRpS23, AspRS, eIF3l, RpL35A, Dp1, RpS27A, mRpS5, Irp-1B, mRpS33, mRpL9, mRpS14, RpS3, CG7414, RpS3A, mRpS29, RpL7A, RpL4, eIF4G1, GluProRS, eIF5, RpL8, RpL15, CG10602, mRpS22, CG17514, CG4679, Rcd-1, bonsai, CG31957, RpS6, DENR, tko, eIF2Bgamma, eIF2Bepsilon
Fat	IV	endoplasmic reticulum	TRUE	1	GO:0005783	endoplasmic reticulum	CC	54	31	20	1.6	0.66	0.0011	0.028	CG13284, Spp, sel, Manf, Cnx99A, Sec61gamma, Gtp-bp, EMC1, CdsA, Spase22-23, prtp, Tapdelta, OstDelta, Sar1, CG6409, gammaCOP, Fkbp14, CG13887, Sec23, SPoCk, Herp, Tango5, Desat1, Surf4, l(1)G0320, SERCA, Acsl, Osbp, Efr, Tango11, PIG-K
Fat	IV	oxidoreductase complex	TRUE	2	GO:1990204	oxidoreductase complex	CC	21	15	7.6	2	0.97	0.0011	0.028	Cyt-c1, Pdha, UQCR-Q, ND-B18, ND-B17.2, ND-B15, Nc73EF, Gpo1, ND-15, UQCR-14, ND-51, ND-MLRQ, ND-49, SdhA, SdhB	Idh3b, CG32649, CG5028, Acon
Fat	IV	innate immune response	TRUE	1	GO:0045087	innate immune response	BP	29	19	11	1.8	0.85	0.0012	0.029	CG4306, PPO2, Hml, Npc2h, Npc2g, SPE, GlyP, GNBP3, Sp7, CanA1, Hf, MP1, cact, betaCOP, psh, Spn77Ba, Eb1, fon, Dredd
Fat	IV	ATP synthesis coupled electron transport	TRUE	8	GO:0042773	ATP synthesis coupled electron transport	BP	16	12	5.8	2.1	1	0.0018	0.04	Cyt-c1, UQCR-Q, ND-B18, ND-B17.2, ND-B15, CG32649, ND-15, UQCR-14, ND-51, ND-MLRQ, ND-49, SdhB	Tspo, Gpo1, SdhA, COX6B
Fat	IV	membrane protein complex	TRUE	1	GO:0098796	membrane protein complex	CC	100	51	37	1.4	0.47	0.0019	0.04	Vps26, Cyt-c1, Ggamma1, CG17646, ATPsynF, Sec61gamma, UQCR-Q, ATPsynO, Gtp-bp, CG3164, ND-B18, COX6B, Pmp70, EMC1, epsilonCOP, Spase22-23, Tapdelta, OstDelta, Sar1, gammaCOP, ND-B17.2, Vamp7, CG5903, Sec23, Tim17b, ND-B15, Galphas, betaCOP, CG4822, ND-15, l(1)G0320, UQCR-14, Slh, CG2316, ATPsynG, ND-51, Sec24AB, ND-MLRQ, ND-49, Vha36-3, Chc, Vha100-1, cm, SdhA, Syx7, beta'COP, nrv2, CG34120, SdhB…
Fat	IV	translational initiation	TRUE	3	GO:0006413	translational initiation	BP	18	13	6.6	2	0.99	0.0021	0.042	AGO2, mxt, eIF3b, eIF3j, eIF3f1, eIF3l, Irp-1B, eIF4G1, eIF5, CG31957, DENR, eIF2Bgamma, eIF2Bepsilon	CG7414
Fat	IV	cytosolic ribosome	TRUE	3	GO:0022626	cytosolic ribosome	CC	30	19	11	1.7	0.8	0.0022	0.043	RpS27, RpL34b, RpS15Ab, RpL37a, RpS19a, RpS28b, RpS13, RpL23, RpL12, RpL36, RpL35A, RpS27A, RpS3, RpS3A, RpL7A, RpL4, RpL8, RpL15, RpS6	DENR, Ciao1
Gut	I	mannose metabolic process	TRUE	5	GO:0006013	mannose metabolic process	BP	6	6	1.9	3.1	1.6	0.0011	0.045	LManIII, LManV, LManVI, LManIV, LManII, LManI	Ect3, Gal, Nprl2
Gut	I	oxidoreductase activity, acting on the aldehyde or oxo group of donors, NAD or NADP as acceptor	TRUE	2	GO:0016620	oxidoreductase activity, acting on the aldehyde or oxo group of donors, NAD or NADP as acceptor	MF	9	8	2.9	2.8	1.5	0.00074	0.041	CG31075, CG7470, CG8665, Aldh, Gapdh1, CG17896, wat, Gapdh2	AOX3
Gut	I	muscle cell development	TRUE	4	GO:0055001	muscle cell development	BP	23	16	7.4	2.2	1.1	0.00025	0.023	Col4a1, l(2)efl, Tm2, Mhc, up, Prm, Mf, Mlc2, wupA, Unc-89, LanB1, Actn, sals, Khc, rhea, ens	Tpi, Mp20, Gapdh1, CalpA
Gut	I	hydrolase activity, acting on glycosyl bonds	TRUE	2	GO:0016798	hydrolase activity, acting on glycosyl bonds	MF	28	19	9	2.1	1.1	0.00011	0.023	LManIII, LManV, LManVI, LManIV, Mal-A7, Hexo2, Mal-A3, Mal-A1, Amy-p, tobi, Ect3, Gal, LManII, LManI, Mal-A8, Mal-A2, CG7997, Mal-A4, CG16965
Gut	I	organic acid catabolic process	TRUE	3	GO:0016054	organic acid catabolic process	BP	22	15	7.1	2.1	1.1	0.00056	0.036	Idh, CG6543, ppl, CG7860, yip2, Gs2, CG6638, Mccc2, Mfe2, CG9149, CG3699, SERCA, CG5009, GstZ1, slgA	CG4390, SCOT, CG17029, CG17026
Gut	I	sarcomere	TRUE	4	GO:0030017	sarcomere	CC	25	16	8.1	2	0.99	0.001	0.045	Chd64, Ald, Tpi, l(2)efl, Tm2, Mhc, up, Prm, Gapdh1, Mf, zormin, wupA, Unc-89, Actn, sals, CG14207	Mlc2, Mp20
Gut	I	carboxylic acid metabolic process	TRUE	3	GO:0019752	carboxylic acid metabolic process	BP	89	45	29	1.6	0.64	0.00018	0.023	CG31075, Men-b, Idh, CG7470, scu, CG6543, Pdk, ppl, Adi1, Men, P5cr-2, Ald, CG15093, Mdh1, CG11899, Tpi, Mdh2, Aldh, CG7860, Got1, yip2, Eno, Gs2, CG6638, Gapdh1, CG17896, ACC, CysRS, ATPCL, Mccc2, Mfe2, CG9149, ry, CG3699, CG31522, AsnRS, SERCA, ND-ACP, PCB, CG5009, GstZ1, CG10932, slgA, Mccc1, Gapdh2	CG5214, CG5599, Acon, CG7280, SdhB
Gut	I	muscle structure development	TRUE	1	GO:0061061	muscle structure development	BP	59	31	19	1.6	0.7	0.00084	0.041	vkg, Col4a1, Tpi, l(2)efl, Tm2, Mhc, Sec24CD, up, Mp20, Prm, Gapdh1, Mf, Mlc2, Snr1, wupA, Dys, shot, Pkg21D, Unc-89, CAP, SmD3, LanB1, Actn, sals, EloB, nsl1, MED11, CalpA, Khc, rhea, ens
Gut	I	lipid droplet	TRUE	1	GO:0005811	lipid droplet	CC	110	56	37	1.5	0.6	8.1e-05	0.023	Idh, CG7470, scu, eEF1alpha1, vkg, CG6543, eEF1gamma, eEF1beta, CG15093, Mdh1, CG7834, CG1648, Mdh2, Aldh, l(2)37Cc, Lam, Sec24CD, Pdi, CG2852, CG5214, yip2, ATPsyndelta, Eno, CG32694, l(1)G0320, pug, Gapdh1, porin, Cyt-b5, Hsc70-3, ACC, regucalcin, ATPCL, Acon, Sar1, Tapdelta, trol, Adk2, SERCA, Hsp60A, PCB, His2Av, eEF2, wal, ATPsynD, CG10932, SsRbeta, Tudor-SN, blw, CG11151, mRpL12, CG1907, Ga…
Gut	I	carbohydrate metabolic process	TRUE	1	GO:0005975	carbohydrate metabolic process	BP	100	50	33	1.5	0.6	0.00022	0.023	LManIII, LManV, LManVI, Mal-A6, LManIV, Mal-A7, Hexo2, Mal-A3, Galk, Mal-A1, Amy-p, tobi, Men-b, Idh, Ect3, Gal, CG10467, LManII, LManI, Pgm, Mal-A8, Mal-A2, Ald, Mdh1, CG7997, Tpi, Mdh2, CG10924, Mal-A4, Eno, Gapdh1, sNPF, Gk1, Hsc70-3, CG17029, ACC, CG17026, ATPCL, LanA, Pkg21D, Oscillin, SmD3, SERCA, ND-ACP, PCB, Taldo, CG16965, Hex-C, CG13369, Gapdh2
Gut	I	small molecule metabolic process	TRUE	1	GO:0044281	small molecule metabolic process	BP	240	100	78	1.3	0.37	0.00044	0.033	LManIII, LManV, LManVI, LManIV, CG31075, Mal-A3, Galk, Mal-A1, Men-b, Idh, CG9512, CG7470, scu, Gal, CG10467, CG6543, Pdk, LManII, CG4390, CG8665, LManI, ppl, Mal-A2, Adi1, Men, P5cr-2, Ald, SCOT, CG15093, Mdh1, CG11899, Tpi, CG7834, sgll, Mdh2, CG10924, Aldh, AdSL, CG7860, Got1, CG5214, yip2, ATPsyndelta, Eno, AdSS, Gs2, CG6638, Gapdh1, sNPF, Hsc70-3, CG17896, CG17029, Vha55, ACC, CysRS, CG17026…
Gut	II	inner mitochondrial membrane protein complex	TRUE	3	GO:0098800	inner mitochondrial membrane protein complex	CC	43	25	8.6	2.9	1.5	2.9e-08	9.6e-06	ND-MLRQ, ND-15, ND-MWFE, sun, cype, ND-19, ND-B14.5A, ATPsynCF6, ATPsynG, ox, CG7394, ATPsynbeta, ND-PDSW, ND-18, COX5B, COX5A, UQCR-C2, COX7A, ND-B17.2, ATPsynE, CG7382, blp, CG11752, ND-24, UQCR-C1	Tom20, Tom40, Sucb
Gut	II	mitochondrial inner membrane	TRUE	4	GO:0005743	mitochondrial inner membrane	CC	58	29	12	2.5	1.3	2e-07	3.3e-05	ND-MLRQ, ND-15, ND-MWFE, sun, cype, Cyt-c-p, ND-19, ND-B14.5A, ATPsynCF6, ATPsynG, CG32174, ox, GC1, CG7394, ATPsynbeta, ND-PDSW, ND-18, COX5B, COX5A, UQCR-C2, COX7A, ND-B17.2, ATPsynE, CG7382, blp, CG11752, ND-24, CG3156, UQCR-C1	Letm1, Tom20, PMP34, Tom40
Gut	II	respiratory chain	TRUE	4	GO:0070469	respiratory chain	CC	28	17	5.6	3	1.6	2.4e-06	0.0002	ND-MLRQ, ND-15, ND-MWFE, cype, ND-19, ND-B14.5A, ox, ND-PDSW, ND-18, COX5B, COX5A, UQCR-C2, COX7A, ND-B17.2, CG11752, ND-24, UQCR-C1
Gut	II	envelope	TRUE	2	GO:0031975	envelope	CC	100	40	20	2	0.98	2.4e-06	0.0002	ND-MLRQ, ND-15, ND-MWFE, sun, cype, Cyt-c-p, ND-19, ND-B14.5A, Rab11, ATPsynCF6, ATPsynG, CG32174, Gp210, Fs(2)Ket, ox, GC1, CG7394, ATPsynbeta, ND-PDSW, ND-18, COX5B, Letm1, COX5A, Fas3, UQCR-C2, 14-3-3zeta, COX7A, ND-B17.2, Tom20, Mtor, ATPsynE, CG7382, blp, CG11752, PMP34, LamC, ND-24, CG3156, Tom40, UQCR-C1
Gut	II	proteolysis	TRUE	1	GO:0006508	proteolysis	BP	130	47	26	1.8	0.86	4.7e-06	0.00032	CG17571, cathD, yip7, CG32473, etaTry, Ufd1-like, CG11034, ALiX, CG16749, CG31855, CG7025, Spn42De, Jon65Aiv, CG3734, CG17477, Jon25Bi, cer, Rpt5, CG8329, lambdaTry, Rpn12, CG8560, CG6337, Ufd4, skap, Ance, Cul3, CG8773, sgg, Rpn9, Jon65Ai, Rpt2, CG32483, CG31198, CG12163, CG17633, CG7631, CSN8, CG5355, UQCR-C1, Rpt4, TppII, casp, goe, REG, CG1304, Spn42Dc
Gut	II	mitochondrial ATP synthesis coupled electron transport	TRUE	8	GO:0042775	mitochondrial ATP synthesis coupled electron transport	BP	27	16	5.4	2.9	1.6	7.5e-06	0.00042	ND-MLRQ, ND-15, cype, ND-19, ND-B14.5A, ox, ND-PDSW, COX5B, COX5A, AIF, UQCR-C2, COX7A, ND-B17.2, dj-1beta, ND-24, UQCR-C1	Cyt-c-p, ND-18, skap, Sucb
Gut	II	organelle membrane	TRUE	1	GO:0031090	organelle membrane	CC	120	44	25	1.8	0.84	1.4e-05	0.00065	ND-MLRQ, ND-15, ND-MWFE, sun, cype, CG14977, Cyt-c-p, ND-19, ND-B14.5A, ATPsynCF6, ATPsynG, CG32174, ox, GC1, CG7394, ATPsynbeta, ND-PDSW, ND-18, Cip4, COX5B, BicD, Letm1, epsilonCOP, COX5A, Fas3, UQCR-C2, 14-3-3zeta, COX7A, ND-B17.2, Tom20, Rab7, ATPsynE, CG7382, blp, Clc, CG11752, PMP34, ND-24, CG3156, Vps37B, Tom40, Vps60, UQCR-C1, Gmap
Gut	II	establishment or maintenance of cell polarity	TRUE	1	GO:0007163	establishment or maintenance of cell polarity	BP	39	19	7.8	2.4	1.3	4.6e-05	0.0019	veli, Rab11, CadN2, prc, Rab6, alpha-Cat, BicD, tsr, 14-3-3zeta, Ras85D, sgg, Mtl, cora, chb, DCTN1-p150, par-6, Rap1, peb, sds22
Gut	II	mitochondrial part	TRUE	1	GO:0044429	mitochondrial part	CC	130	44	27	1.6	0.72	0.00016	0.0058	ND-MLRQ, ND-15, ND-MWFE, sun, cype, Cyt-c-p, ND-19, ND-B14.5A, ATPsynCF6, ATPsynG, CG32174, ox, GC1, CG7394, ATPsynbeta, ND-PDSW, mRpL54, ND-18, CG11267, COX5B, mRpL30, Letm1, COX5A, UQCR-C2, COX7A, ND-B17.2, dare, mRpL41, mRpS23, Tom20, ATPsynE, mRpL48, CG7382, mRpL42, blp, CG11752, PMP34, ND-24, Sucb, CG3156, Tom40, UQCR-C1, mRpL33, mRpS18B
Gut	II	ATP metabolic process	TRUE	19	GO:0046034	ATP metabolic process	BP	54	22	11	2	1	0.00032	0.011	ND-MLRQ, ND-15, sun, cype, Cyt-c-p, ND-19, ND-B14.5A, ATPsynCF6, ATPsynG, ox, ATPsynbeta, ND-PDSW, COX5B, COX5A, AIF, UQCR-C2, COX7A, ND-B17.2, ATPsynE, dj-1beta, ND-24, UQCR-C1	PlexA, CG33054, CG6767, CG17333
Gut	II	locomotion	TRUE	1	GO:0040011	locomotion	BP	95	33	19	1.7	0.79	0.00041	0.011	sls, veli, Rab11, Rab1, CadN2, prc, lap, Rab6, tsr, PlexA, Fas3, Hem, dare, Ras85D, sqh, Rab7, kra, chic, Ptp69D, homer, pain, for, bbg, Stam, bsk, Mtl, dock, chb, cindr, par-6, Rap1, hts, Mical
Gut	II	peptidase activity, acting on L-amino acid peptides	TRUE	2	GO:0070011	peptidase activity, acting on L-amino acid peptides	MF	95	33	19	1.7	0.79	0.00041	0.011	CG17571, cathD, yip7, CG32473, etaTry, CG11034, ALiX, CG16749, CG7025, Jon65Aiv, CG3734, CG17477, Jon25Bi, cer, Rpt5, CG8329, lambdaTry, CG8560, CG6337, Ance, CG8773, Jon65Ai, CG32483, CG31198, CG12163, CG17633, CG7631, CSN8, CG5355, UQCR-C1, TppII, goe, CG1304
Gut	II	membrane protein complex	TRUE	1	GO:0098796	membrane protein complex	CC	130	41	26	1.6	0.68	0.00049	0.013	ND-MLRQ, ND-15, ND-MWFE, sun, Lfg, cype, CG14977, ND-19, ND-B14.5A, ATPsynCF6, Syx8, ATPsynG, ox, CG7394, ATPsynbeta, ND-PDSW, ND-18, lap, Snx3, alpha-Cat, COX5B, epsilonCOP, COX5A, UQCR-C2, nrv3, COX7A, ND-B17.2, Tom20, CG33970, ATPsynE, pain, CG7382, blp, Clc, CG11752, ND-24, Vps37B, Tom40, Vps60, UQCR-C1, Syx13
Gut	II	movement of cell or subcellular component	TRUE	1	GO:0006928	movement of cell or subcellular component	BP	93	32	19	1.7	0.78	0.00061	0.015	veli, Rab11, Rab1, Myo28B1, CadN2, prc, Rab6, tsr, PlexA, Fas3, Hem, CG3339, Ras85D, sqh, Rab7, kra, chic, Ptp69D, DCTN4-p62, for, bbg, Stam, bsk, Mtl, dock, chb, DCTN1-p150, cindr, par-6, Rap1, hts, Mical
Gut	II	mitochondrion	TRUE	1	GO:0005739	mitochondrion	CC	200	59	41	1.4	0.53	0.00076	0.017	ND-MLRQ, ND-15, ND-MWFE, sun, cype, Cyt-c-p, ND-19, Cyp12a5, ND-B14.5A, ATPsynCF6, ATPsynG, CG32174, ox, GC1, CG7394, ATPsynbeta, ND-PDSW, mRpL54, ND-18, CG11267, COX5B, mRpL30, Letm1, Tango9, CG4598, COX5A, AIF, MCU, UQCR-C2, COX7A, CG8993, PHGPx, ND-B17.2, skap, dare, mRpL41, mRpS23, Tom20, CG4594, ATPsynE, mRpL48, CG7382, GlyRS, mRpL42, blp, CG42376, CG11752, PMP34, ND-24, mEFTu2, CysRS-m, Suc…
Gut	II	proton transmembrane transporter activity	TRUE	2	GO:0015078	proton transmembrane transporter activity	MF	30	14	6	2.3	1.2	0.00084	0.017	sun, cype, ATPsynCF6, ATPsynG, ox, ATPsynbeta, COX5B, Letm1, COX5A, UQCR-C2, COX7A, ATPsynE, CG42376, UQCR-C1	GC1, nrv3, dmGlut, CG17167
Gut	II	regulation of proteolysis	TRUE	1	GO:0030162	regulation of proteolysis	BP	18	10	3.6	2.8	1.5	0.00088	0.017	Ufd1-like, CG31855, Spn42De, cer, skap, Cul3, sgg, casp, REG, Spn42Dc
Gut	II	nucleotide metabolic process	TRUE	4	GO:0009117	nucleotide metabolic process	BP	80	28	16	1.7	0.8	0.001	0.018	ND-MLRQ, ND-15, sun, CG42249, cype, Cyt-c-p, ND-19, ND-B14.5A, ATPsynCF6, ATPsynG, ox, ATPsynbeta, ND-PDSW, COX5B, veil, PlexA, COX5A, AIF, UQCR-C2, COX7A, ND-B17.2, CG17333, ATPsynE, CG6767, dj-1beta, ND-24, UQCR-C1, Mical	CG9391, Uba5, CG33054
Gut	II	protein localization	TRUE	1	GO:0008104	protein localization	BP	120	38	24	1.6	0.67	0.001	0.018	CG14977, CG3529, Rab11, Dap160, Rab1, Gp210, Fs(2)Ket, CG7394, Snx3, Cip4, alpha-Cat, Tango9, Sara, Ras85D, Clbn, sgg, Tom20, Mtor, Srp14, chic, CG7382, blp, Stam, GCC185, Clc, LamC, exd, cora, Tom40, DCTN1-p150, par-6, Vinc, garz, RanGAP, lqf, Gdi, Syx13, Gmap
Gut	II	cellular protein localization	TRUE	2	GO:0034613	cellular protein localization	BP	92	31	18	1.7	0.75	0.0011	0.019	CG14977, CG3529, Rab11, Gp210, Fs(2)Ket, CG7394, Snx3, Cip4, alpha-Cat, Ras85D, Clbn, sgg, Tom20, Mtor, Srp14, chic, CG7382, blp, Stam, GCC185, Clc, LamC, exd, cora, Tom40, DCTN1-p150, Vinc, RanGAP, lqf, Syx13, Gmap	Tm1, Rab6, BicD, glo, Lasp
Gut	II	midbody	TRUE	1	GO:0030496	midbody	CC	6	5	1.2	4.1	2	0.0016	0.023	ALiX, Cip4, sqh, DCTN1-p150, cindr
Gut	II	cytochrome-c oxidase activity	TRUE	5	GO:0004129	cytochrome-c oxidase activity	MF	6	5	1.2	4.1	2	0.0016	0.023	cype, COX5B, COX5A, COX7A, CG42376	ox, UQCR-C2, UQCR-C1
Gut	II	intracellular protein transport	TRUE	3	GO:0006886	intracellular protein transport	BP	67	24	13	1.8	0.83	0.0016	0.023	CG3529, Gp210, Fs(2)Ket, CG7394, Snx3, Ras85D, Clbn, sgg, Tom20, Mtor, Srp14, CG7382, blp, Stam, GCC185, Clc, exd, cora, Tom40, DCTN1-p150, RanGAP, lqf, Syx13, Gmap	Rab11, Rab1, Tango9, garz, Gdi
Gut	II	cell motility	TRUE	3	GO:0048870	cell motility	BP	42	17	8.4	2	1	0.0017	0.024	veli, Rab11, Rab1, prc, tsr, Hem, Ras85D, sqh, Rab7, bbg, Stam, bsk, Mtl, chb, cindr, par-6, Rap1	alpha-Cat
Gut	II	germ cell development	TRUE	2	GO:0007281	germ cell development	BP	140	42	28	1.5	0.57	0.0026	0.035	cathD, Tm1, ALiX, veli, Rab11, Fs(2)Ket, ox, Cip4, Rab6, alpha-Cat, BicD, tsr, Fas3, mod, Hem, 14-3-3zeta, glo, skap, Ras85D, Ance, sqh, Cul3, orb2, sgg, Rab7, kra, tefu, chic, bbg, bsk, CSN8, Lasp, Vps60, chb, DCTN1-p150, cindr, Rpt4, par-6, Rap1, hts, goe, kst
Gut	II	cognition	TRUE	2	GO:0050890	cognition	BP	30	13	6	2.2	1.1	0.003	0.038	Rab32, Gp210, cer, Fas3, 14-3-3zeta, Inx7, orb2, sgg, kra, for, bsk, Gclm, CrebB
Gut	II	germline ring canal	TRUE	2	GO:0045172	germline ring canal	CC	9	6	1.8	3.3	1.7	0.0031	0.038	14-3-3zeta, sqh, Cul3, sgg, chb, hts	ALiX, cindr
Gut	II	establishment of protein localization to organelle	TRUE	3	GO:0072594	establishment of protein localization to organelle	BP	34	14	6.8	2.1	1	0.0036	0.044	Gp210, Fs(2)Ket, CG7394, Ras85D, sgg, Tom20, Mtor, Srp14, CG7382, blp, GCC185, exd, Tom40, Gmap	cora, CG14977, DCTN1-p150
Gut	II	border follicle cell migration	TRUE	6	GO:0007298	border follicle cell migration	BP	21	10	4.2	2.4	1.2	0.004	0.046	veli, Rab11, tsr, Ras85D, sqh, Rab7, bbg, bsk, cindr, par-6	Stam
Gut	II	serine-type endopeptidase activity	TRUE	3	GO:0004252	serine-type endopeptidase activity	MF	31	13	6.2	2.1	1.1	0.0042	0.047	CG17571, yip7, etaTry, CG16749, Jon65Aiv, CG17477, Jon25Bi, CG8329, lambdaTry, Jon65Ai, CG5355, TppII, CG1304	CG11034, CG3734, CG32483, CG5377
Gut	II	endosome transport via multivesicular body sorting pathway	TRUE	5	GO:0032509	endosome transport via multivesicular body sorting pathway	BP	7	5	1.4	3.6	1.8	0.0047	0.049	Ccz1, Rab7, Vps37B, Vps60, kst	Arf79F, Stam, GCC185, CG14977
Gut	II	chromosome, centromeric region	TRUE	2	GO:0000775	chromosome, centromeric region	CC	7	5	1.4	3.6	1.8	0.0047	0.049	CLIP-190, PPP4R2r, chb, DCTN1-p150, Su(var)205	CG4747, REG
Gut	III	proteasome core complex	TRUE	8	GO:0005839	proteasome core complex	CC	8	8	2.1	3.8	1.9	2.4e-05	0.0089	Prosalpha5, Prosalpha1, Prosbeta6, Prosbeta2, Prosalpha3, Prosbeta5, Prosbeta1, Prosalpha7	Rpt6, Rpn5, Rpn10, Rpn7, PI31, CG8858
Gut	IV	cytosolic ribosome	TRUE	6	GO:0022626	cytosolic ribosome	CC	36	17	6.1	2.8	1.5	2e-05	0.0045	RpS10b, RpS13, RpL13A, RpL3, RpL21, RpS2, RpL27A, RpS15Aa, RpL29, RpL26, RpS4, RpL34a, RpL32, RpL7A, RpS10a, RpL30, RpL27	Rack1, MCTS1, mRpS6, mRpL2, mRpL36, CCT7
Gut	IV	cytosolic large ribosomal subunit	TRUE	2	GO:0022625	cytosolic large ribosomal subunit	CC	20	11	3.4	3.2	1.7	0.00011	0.01	RpL13A, RpL3, RpL21, RpL27A, RpL29, RpL26, RpL34a, RpL32, RpL7A, RpL30, RpL27	mRpL2, mRpL36
Gut	IV	gene silencing by miRNA	TRUE	14	GO:0035195	gene silencing by miRNA	BP	5	5	0.85	5.9	2.6	0.00014	0.01	AGO2, DCP1, me31B, Cbp20, Atx2	CG8036, CG7927, Srp9, CoRest, Rm62
Gut	IV	translation	TRUE	3	GO:0006412	translation	BP	130	36	22	1.7	0.74	0.00057	0.033	Rack1, RpS10b, RpS13, RpL13A, RpL3, RpL21, eIF3e, RpS2, RpL27A, RpS15Aa, RpL29, mRpS6, AGO2, mRpL2, RpL26, RpS4, clu, RpL34a, Rheb, Srp9, RpL32, RpL7A, RpS10a, MCTS1, AspRS, DCP1, RpL30, RpL27, eIF3k, eIF1, me31B, Cbp20, eIF3l, mRpL36, alpha-PheRS, Atx2	Uro
Brain	I	regulation of mRNA 3'-end processing	TRUE	5	GO:0031440	regulation of mRNA 3'-end processing	BP	6	6	2.1	2.8	1.5	0.002	0.016	Rsf1, SF2, Nab2, elav, swm, B52	CG4611, snRNP-U1-70K, Psi
Brain	I	negative regulation of RNA splicing	TRUE	1	GO:0033119	negative regulation of RNA splicing	BP	5	5	1.8	2.8	1.5	0.0056	0.032	Rsf1, Hrb98DE, sqd, snRNP-U1-70K, Psi
Brain	I	negative regulation of organ growth	TRUE	3	GO:0046621	negative regulation of organ growth	BP	5	5	1.8	2.8	1.5	0.0056	0.032	Capr, rin, TSG101, Tao, ed	chico, kis
Brain	I	axon extension involved in axon guidance	TRUE	3	GO:0048846	axon extension involved in axon guidance	BP	5	5	1.8	2.8	1.5	0.0056	0.032	CadN, RhoGAP100F, Lar, Dscam1, Liprin-alpha	PlexA, RhoGAPp190
Brain	I	neuromuscular junction	TRUE	1	GO:0031594	neuromuscular junction	CC	15	13	5.3	2.4	1.3	6.2e-05	0.0015	Cip4, Con, brp, Tomosyn, dlg1, eIF4E1, WASp, cpx, par-1, Rab3-GEF, Nrx-1, Ank2, Ten-m
Brain	I	mushroom body development	TRUE	3	GO:0016319	mushroom body development	BP	10	9	3.6	2.5	1.3	0.00059	0.0078	toy, bsk, Nrg, CG3638, bun, Tao, RhoGAPp190, Dscam1, ed	Csp
Brain	I	midbody	TRUE	1	GO:0030496	midbody	CC	8	7	2.8	2.5	1.3	0.0039	0.026	Cip4, smt3, shrb, sqh, DCTN1-p150, Cam, Map205
Brain	I	pole plasm	TRUE	1	GO:0045495	pole plasm	CC	8	7	2.8	2.5	1.3	0.0039	0.026	gus, RapGAP1, SmD3, SmB, tral, Fs(2)Ket, Hrb27C
Brain	I	ribonucleoprotein granule	TRUE	2	GO:0035770	ribonucleoprotein granule	CC	7	6	2.5	2.4	1.3	0.0097	0.044	4E-T, eIF4E1, gw, tral, Fs(2)Ket, Hrb27C
Brain	I	type I terminal bouton	TRUE	1	GO:0061174	type I terminal bouton	CC	7	6	2.5	2.4	1.3	0.0097	0.044	ena, jeb, dlg1, par-1, Csp, metro
Brain	I	spindle	TRUE	1	GO:0005819	spindle	CC	13	11	4.6	2.4	1.2	0.00038	0.0058	Lam, Chro, CG6664, Asator, Gyf, Mad1, sqh, DCTN1-p150, Mtor, Cam, Map205
Brain	I	neuronal cell body	TRUE	2	GO:0043025	neuronal cell body	CC	11	9	3.9	2.3	1.2	0.0022	0.018	sNPF, Rab2, hig, Imp, Rab3-GEF, bol, Rab6, Rab5, Dscam1	Pka-C1
Brain	I	negative regulation of Notch signaling pathway	TRUE	3	GO:0045746	negative regulation of Notch signaling pathway	BP	10	8	3.6	2.3	1.2	0.0052	0.032	shrb, Eps-15, krz, numb, bun, ct, Dap160, Su(dx)	E(bx), Vha68-1, pzg, heph, CoRest
Brain	I	axon extension	TRUE	4	GO:0048675	axon extension	BP	14	11	5	2.2	1.1	0.0012	0.012	dnc, CadN, RhoGAP100F, bsk, DCTN1-p150, Nrg, Ank2, Lar, Rab5, Dscam1, Liprin-alpha	chico, Ras85D, sqh
Brain	I	cell cycle checkpoint	TRUE	12	GO:0000075	cell cycle checkpoint	BP	16	12	5.7	2.1	1.1	0.0014	0.013	Chro, SF2, E(bx), Kap-alpha3, Rga, Mad1, Mtor, Mnn1, eIF4G1, RpII15, Top2, Ald	endos, brm, bol, Ras85D
Brain	I	regulation of mitotic cell cycle	TRUE	1	GO:0007346	regulation of mitotic cell cycle	BP	25	18	8.9	2	1	0.0002	0.004	Chro, SF2, Capr, E(bx), endos, Kap-alpha3, pzg, brm, Rga, swm, Mad1, Mtor, Mnn1, eIF4G1, RpII15, Top2, crol, Ald
Brain	I	modulation of chemical synaptic transmission	TRUE	1	GO:0050804	modulation of chemical synaptic transmission	BP	19	14	6.8	2.1	1	0.00074	0.0089	Sap47, jeb, brp, Pka-C1, Tomosyn, Fife, Frq2, cpx, chico, Csp, Nrx-1, mGluR, Ank2, Galphaq
Brain	I	DNA metabolic process	TRUE	1	GO:0006259	DNA metabolic process	BP	20	14	7.1	2	0.98	0.0017	0.015	mtSSB, mip120, Dref, TFAM, Ubc6, CoRest, Rad23, vtd, Acn, Mnn1, CG18004, Top2, DMAP1, RPA3
Brain	I	regulation of mRNA processing	TRUE	2	GO:0050684	regulation of mRNA processing	BP	23	16	8.2	2	0.97	0.00085	0.0092	Pep, Rsf1, SF2, Hrb98DE, Nab2, elav, Rm62, fne, sqd, swm, B52, snRNP-U1-70K, CG1646, Psi, hfp, Hrb27C
Brain	I	positive regulation of intracellular signal transduction	TRUE	1	GO:1902533	positive regulation of intracellular signal transduction	BP	23	16	8.2	2	0.97	0.00085	0.0092	sNPF, Nplp1, 14-3-3zeta, jeb, smt3, Sf3a2, RhoGAP1A, eIF4B, par-1, Rab3-GEF, glo, Mnn1, CG10188, Ras85D, RagC-D, Tao
Brain	I	sequence-specific DNA binding	TRUE	1	GO:0043565	sequence-specific DNA binding	MF	23	16	8.2	2	0.97	0.00085	0.0092	Dref, Hrb98DE, D1, HmgD, toy, crp, Octbeta2R, Ibf1, chn, Deaf1, CrebB, mod, ct, Top2, Cf2, Pur-alpha
Brain	I	somatodendritic compartment	TRUE	1	GO:0036477	somatodendritic compartment	CC	22	15	7.8	1.9	0.94	0.0017	0.015	sNPF, ena, Pka-C1, CadN, tau, bsk, Rab2, hig, Imp, Rab3-GEF, bol, mtt, Rab6, Rab5, Dscam1
Brain	I	mRNA binding	TRUE	1	GO:0003729	mRNA binding	MF	57	38	20	1.9	0.91	1e-06	0.00018	scaf6, Rsf1, Ref1, SF2, nito, nonA, Hrb98DE, elav, Rm62, fne, rin, CG7903, sqd, CG7564, CG4612, heph, swm, B52, eIF4B, Imp, CG34354, bru3, snRNP-U1-70K, qkr58E-2, Psi, hfp, yps, qkr54B, bol, cpo, glo, mod, Zn72D, Top2, CG4887, Pur-alpha, CG30122, Hrb27C
Brain	I	precatalytic spliceosome	TRUE	2	GO:0071011	precatalytic spliceosome	CC	39	26	14	1.9	0.91	5.9e-05	0.0015	Pep, Ref1, SF2, SmD2, nito, nonA, Rm62, Sf3a2, rin, CG7971, sqd, CG7564, B52, Imp, snRNP-U1-70K, Prp3, Acn, SF1, hfp, yps, SmD1, SmD3, SmB, Zn72D, CG4887, CG30122	scaf6, CG9344
Brain	I	neuron recognition	TRUE	2	GO:0008038	neuron recognition	BP	21	14	7.5	1.9	0.91	0.0034	0.023	Con, Nrt, CadN, tutl, WASp, Fas1, Ptp69D, hig, PlexA, Galphaq, CG5758, RhoGAPp190, Dscam1, Ten-m
Brain	I	transmembrane signaling receptor activity	TRUE	2	GO:0004888	transmembrane signaling receptor activity	MF	18	12	6.4	1.9	0.91	0.0068	0.036	5-HT1A, CG31760, Ptp69D, Cirl, Octbeta2R, Octalpha2R, Nmdar2, PlexA, mGluR, mtt, Lar, Dscam1	Elk
Brain	I	negative regulation of nitrogen compound metabolic process	TRUE	2	GO:0051172	negative regulation of nitrogen compound metabolic process	BP	47	31	17	1.9	0.89	1.5e-05	0.00064	Lam, mip120, Rsf1, Hrb98DE, Nab2, elav, sqd, Ssb-c31a, Rga, heph, swm, bru3, CoRest, snRNP-U1-70K, gw, Prp3, Nelf-A, Ibf1, Psi, l(3)neo38, Acn, kis, ph-d, chn, ct, Atx2, Top2, crol, DMAP1, Pur-alpha, Hrb27C	Rm62, Scm, puf
Brain	I	DNA binding	TRUE	1	GO:0003677	DNA binding	MF	63	41	22	1.8	0.87	9.7e-07	0.00018	mtSSB, Pep, mip120, Dref, SF2, Adf1, Hrb98DE, HIPP1, CG33695, D1, HmgD, Dek, toy, crp, Dlip3, Ssb-c31a, pzg, Non2, CG7154, Octbeta2R, His1:CG33855, CoRest, Rad23, Ibf1, yps, ph-d, chn, Cdep, Mtor, His2Av, Deaf1, CrebB, mod, ct, NUCB1, Top2, Cf2, Pur-alpha, RPA3, FK506-bp1, Hrb27C
Brain	I	negative regulation of RNA metabolic process	TRUE	2	GO:0051253	negative regulation of RNA metabolic process	BP	37	24	13	1.8	0.87	0.00022	0.0043	Lam, mip120, Rsf1, Hrb98DE, Nab2, elav, sqd, Ssb-c31a, swm, CoRest, snRNP-U1-70K, Prp3, Nelf-A, Ibf1, Psi, l(3)neo38, kis, ph-d, chn, ct, Top2, crol, DMAP1, Pur-alpha	Acn
Brain	I	catalytic step 2 spliceosome	TRUE	1	GO:0071013	catalytic step 2 spliceosome	CC	31	20	11	1.8	0.86	0.00085	0.0092	Pep, Ref1, SF2, SmD2, nonA, Rm62, Sf3a2, rin, CG7971, sqd, B52, Imp, snRNP-U1-70K, Acn, hfp, yps, SmD1, SmD3, SmB, Zn72D
Brain	I	mRNA splicing, via spliceosome	TRUE	4	GO:0000398	mRNA splicing, via spliceosome	BP	53	34	19	1.8	0.85	1.4e-05	0.00064	Pep, scaf6, Rsf1, Ref1, SF2, SmD2, nito, nonA, Hrb98DE, Rm62, Sf3a2, rin, CG7971, sqd, CG9344, CG7564, heph, B52, Imp, snRNP-U1-70K, Prp3, CG1646, Psi, Acn, SF1, hfp, yps, SmD1, SmD3, SmB, Zn72D, CG4887, CG30122, Hrb27C	btz
Brain	I	synaptic growth at neuromuscular junction	TRUE	3	GO:0051124	synaptic growth at neuromuscular junction	BP	36	23	13	1.8	0.85	0.00042	0.0062	stj, ena, Cip4, jeb, Syn, dlg1, Eps-15, WASp, veli, Imp, cpx, Octbeta2R, par-1, atl, Nrx-1, Cul2, metro, kis, Ank2, Lar, Dap160, Liprin-alpha, Ten-m	Adf1, Prosap, Frq2, mGluR, CrebB
Brain	I	memory	TRUE	3	GO:0007613	memory	BP	25	16	8.9	1.8	0.85	0.0032	0.023	dnc, Adf1, klg, 5-HT1A, brp, Pka-C1, Tomosyn, CG1910, Syn, bsk, svr, Nmdar2, kis, Ank2, CrebB, Atx2	Sap47, 14-3-3zeta, chico, rogdi, Nrx-1
Brain	I	mRNA processing	TRUE	3	GO:0006397	mRNA processing	BP	63	40	22	1.8	0.84	3.4e-06	0.00031	Pep, scaf6, Rsf1, Ref1, SF2, SmD2, nito, nonA, Hrb98DE, Nab2, elav, Rm62, fne, Sf3a2, rin, CG7971, Dek, sqd, CG9344, CG7564, heph, swm, B52, Imp, snRNP-U1-70K, Prp3, CG1646, Psi, Acn, SF1, hfp, yps, SmD1, SmD3, SmB, Zn72D, CG4887, CG30122, btz, Hrb27C	CG4611, NHP2, Rga, gw
Brain	I	dendrite morphogenesis	TRUE	2	GO:0048813	dendrite morphogenesis	BP	30	19	11	1.8	0.83	0.0016	0.015	Dref, Adf1, d4, ena, E(bx), GM130, smt3, HmgD, CadN, tutl, shrb, brm, Ptp69D, nudC, Nrg, chn, Rab5, ct, Dscam1
Brain	I	synapse	TRUE	1	GO:0045202	synapse	CC	62	39	22	1.8	0.82	6.5e-06	0.00044	Sap47, Syt7, Prosap, stj, ena, Cip4, Con, unc-13-4A, jeb, brp, Tomosyn, RhoGAP100F, Fife, Rbp, Syn, dlg1, Eps-15, eIF4E1, WASp, Rab26, Frq2, hig, veli, Cirl, cpx, VGlut, par-1, Ace, Rab3-GEF, Csp, Nrx-1, metro, CanB2, Ank2, Rab6, Rab5, Dap160, Liprin-alpha, Ten-m
Brain	I	regulation of RNA biosynthetic process	TRUE	3	GO:2001141	regulation of RNA biosynthetic process	BP	79	49	28	1.7	0.8	6.9e-07	0.00018	Lam, mip120, Dref, Rsf1, SF2, Adf1, ATbp, d4, E(bx), TFAM, Pka-C1, CG8578, toy, Hcf, Dlip3, Ssb-c31a, brm, Rga, B52, Octbeta2R, CoRest, Prp3, Nelf-A, Ibf1, CkIIalpha, l(3)neo38, Cul2, MED1, yps, kis, row, ph-d, Scm, atms, chn, Mtor, Deaf1, Hsp83, Sap130, CrebB, bun, Ras85D, ct, Top2, Cf2, crol, DMAP1, Pur-alpha, Crtc
Brain	I	positive regulation of signal transduction	TRUE	3	GO:0009967	positive regulation of signal transduction	BP	42	26	15	1.7	0.8	0.00037	0.0057	sNPF, Nplp1, nito, 14-3-3zeta, E(bx), Wnk, jeb, smt3, Sf3a2, Snx3, RhoGAP1A, pzg, brm, eIF4B, par-1, lgs, CoRest, Rab3-GEF, CkIIalpha, glo, nst, Mnn1, CG10188, Ras85D, RagC-D, Tao	Fife, chico, p24-1
Brain	I	cell growth	TRUE	1	GO:0016049	cell growth	BP	31	19	11	1.7	0.79	0.0028	0.02	dnc, CadN, RhoGAP100F, bsk, eIF4E1, sqh, chico, Trpm, DCTN1-p150, hfp, Nrg, Ank2, Lar, bun, Rab5, Ras85D, puf, Dscam1, Liprin-alpha
Brain	I	regulation of cellular component size	TRUE	2	GO:0032535	regulation of cellular component size	BP	26	16	9.2	1.7	0.79	0.0057	0.032	btsz, sNPF, ena, Cip4, CadN, RhoGAP1A, WASp, Vrp1, chico, Best1, Rbpn-5, Lar, Ras85D, Atx2, RhoGAPp190, Liprin-alpha	sqh, Nrg, pasi2, zip
Brain	I	neuron part	TRUE	1	GO:0097458	neuron part	CC	69	42	25	1.7	0.78	9.5e-06	0.00051	sNPF, Syt7, Prosap, stj, ena, Con, unc-13-4A, jeb, brp, Pka-C1, Tomosyn, CadN, RhoGAP100F, tau, Fife, Rbp, Syn, bsk, dlg1, Rab2, Eps-15, Frq2, Ptp69D, hig, Cirl, Imp, cpx, VGlut, par-1, Rab3-GEF, Csp, metro, CanB2, Ank2, bol, mtt, Rab6, Lar, Rab5, Dap160, Dscam1, Liprin-alpha
Brain	I	regulation of cell development	TRUE	2	GO:0060284	regulation of cell development	BP	43	26	15	1.7	0.77	0.00062	0.0078	Adf1, GM130, Pka-C1, CadN, tutl, bsk, dlg1, Dlip3, brm, CG5214, nudC, Imp, par-1, numb, PlexA, bic, Galphaq, Lar, bun, Ras85D, Dap160, RhoGAPp190, Dscam1, Hrb27C, Liprin-alpha, ed	nito, krz, chn, zip
Brain	I	negative regulation of macromolecule biosynthetic process	TRUE	4	GO:0010558	negative regulation of macromolecule biosynthetic process	BP	38	23	14	1.7	0.77	0.0013	0.012	Lam, mip120, sqd, Ssb-c31a, Rga, heph, bru3, CoRest, gw, Prp3, Nelf-A, Ibf1, l(3)neo38, kis, ph-d, chn, ct, Atx2, Top2, crol, DMAP1, Pur-alpha, Hrb27C
Brain	I	regulation of neurogenesis	TRUE	1	GO:0050767	regulation of neurogenesis	BP	33	20	12	1.7	0.77	0.0026	0.019	Adf1, GM130, CadN, tutl, bsk, Dlip3, brm, CG5214, nudC, Imp, numb, PlexA, Lar, bun, Ras85D, Dap160, RhoGAPp190, Dscam1, Liprin-alpha, ed
Brain	I	anterior/posterior pattern specification	TRUE	1	GO:0009952	anterior/posterior pattern specification	BP	28	17	10	1.7	0.77	0.0053	0.032	ena, smt3, Pka-C1, sqd, gus, sqh, par-1, fs(1)M3, glo, SmD3, bic, Hsp83, Rab6, Ras85D, ct, btz, Hrb27C
Brain	I	DNA binding transcription factor activity	TRUE	1	GO:0003700	DNA binding transcription factor activity	MF	28	17	10	1.7	0.77	0.0053	0.032	Dref, Adf1, d4, TFAM, toy, Hcf, Dlip3, Octbeta2R, l(3)neo38, Scm, CG11970, chn, Deaf1, CrebB, bun, ct, Cf2
Brain	I	negative regulation of cellular metabolic process	TRUE	3	GO:0031324	negative regulation of cellular metabolic process	BP	63	38	22	1.7	0.76	3.5e-05	0.0011	Lam, mip120, Rsf1, Hrb98DE, Nab2, elav, endos, sqd, bsk, Ssb-c31a, krz, Rga, heph, swm, par-1, bru3, CoRest, snRNP-U1-70K, gw, Prp3, Nelf-A, Ibf1, CkIIalpha, Psi, l(3)neo38, Acn, kis, ph-d, chn, Nca, Mnn1, ct, Atx2, Top2, crol, DMAP1, Pur-alpha, Hrb27C	Rm62, Scm, puf
Brain	I	positive regulation of response to stimulus	TRUE	1	GO:0048584	positive regulation of response to stimulus	BP	55	33	20	1.7	0.76	0.00014	0.0029	sNPF, Nplp1, nito, 14-3-3zeta, E(bx), Wnk, jeb, smt3, CG32795, mtd, Sf3a2, Snx3, RhoGAP1A, pzg, brm, eIF4B, Imp, par-1, lgs, CoRest, chico, Rab3-GEF, CkIIalpha, glo, nst, Mnn1, iPLA2-VIA, Crag, CG10188, Ras85D, RagC-D, DMAP1, Tao
Brain	I	regulation of cell cycle	TRUE	1	GO:0051726	regulation of cell cycle	BP	40	24	14	1.7	0.76	0.0012	0.012	Chro, Dref, SF2, Capr, E(bx), endos, Kap-alpha3, dlg1, pzg, brm, Rga, swm, Mad1, Rab3-GEF, hfp, bol, Mtor, Mnn1, eIF4G1, RpII15, Top2, crol, Ald, zip
Brain	I	axonogenesis	TRUE	2	GO:0007409	axonogenesis	BP	57	34	20	1.7	0.75	0.00013	0.0028	dnc, aay, ena, Wnk, jeb, smt3, Nrt, CadN, RhoGAP100F, tutl, bsk, WASp, brm, Fas1, Ptp69D, DCTN1-p150, CkIIalpha, Nrg, dock, PlexA, kis, Ank2, Scm, Pka-R2, Galphaq, Cam, Rab6, Lar, Rab5, RhoGAPp190, Dscam1, Hrb27C, Liprin-alpha, Ten-m	Con, Imp
Brain	I	regulation of intracellular signal transduction	TRUE	1	GO:1902531	regulation of intracellular signal transduction	BP	49	29	17	1.7	0.74	0.0005	0.0069	sNPF, dnc, Nplp1, 14-3-3zeta, Efa6, E(bx), jeb, smt3, Sf3a2, bsk, RhoGAP1A, pzg, eIF4B, TSG101, par-1, Rab3-GEF, RapGAP1, syd, RhoGEF3, glo, Cdep, Mnn1, Crag, CG10188, Ras85D, RagC-D, siz, Tao, ed
Brain	I	presynapse	TRUE	2	GO:0098793	presynapse	CC	42	25	15	1.7	0.74	0.0011	0.011	Syt7, stj, ena, unc-13-4A, jeb, brp, Tomosyn, RhoGAP100F, Fife, Rbp, Syn, dlg1, Eps-15, Frq2, Cirl, cpx, VGlut, par-1, Rab3-GEF, Csp, metro, CanB2, Ank2, Dap160, Liprin-alpha	Prosap, eIF4E1, hig, veli, Ten-m
Brain	I	oocyte axis specification	TRUE	5	GO:0007309	oocyte axis specification	BP	27	16	9.6	1.7	0.74	0.0095	0.044	14-3-3zeta, Pka-C1, sqd, heph, gus, par-1, CkIIalpha, glo, SmD3, bic, Hsp83, Rab6, tral, Ras85D, btz, Hrb27C	rin, fs(1)M3, zip, Atx2
Brain	I	cell morphogenesis involved in neuron differentiation	TRUE	2	GO:0048667	cell morphogenesis involved in neuron differentiation	BP	78	46	28	1.7	0.73	1.2e-05	0.00057	dnc, Dref, Adf1, aay, d4, ena, E(bx), Wnk, GM130, jeb, smt3, Nrt, HmgD, CadN, RhoGAP100F, tau, tutl, shrb, bsk, WASp, brm, Fas1, Ptp69D, nudC, DCTN1-p150, CkIIalpha, Nrg, dock, PlexA, kis, Ank2, Scm, Pka-R2, chn, Galphaq, Cam, Rab6, Lar, Rab5, Ras85D, ct, RhoGAPp190, Dscam1, Hrb27C, Liprin-alpha, Ten-m	Ppcs, sqh
Brain	I	central nervous system development	TRUE	1	GO:0007417	central nervous system development	BP	34	20	12	1.7	0.73	0.0043	0.027	Lam, elav, smt3, Nrt, toy, bsk, brm, Csp, numb, Nrg, Scm, SmD3, CG3638, bun, ct, siz, Tao, RhoGAPp190, Dscam1, ed
Brain	I	neuron projection morphogenesis	TRUE	3	GO:0048812	neuron projection morphogenesis	BP	89	52	32	1.6	0.72	4.3e-06	0.00033	dnc, Dref, Adf1, aay, d4, ringer, ena, E(bx), Wnk, GM130, jeb, smt3, Nrt, HmgD, CadN, RhoGAP100F, tau, tutl, shrb, bsk, WASp, brm, Fas1, Ptp69D, CG7154, nudC, DCTN1-p150, CkIIalpha, metro, Nrg, dock, PlexA, SLO2, kis, Ank2, Scm, Pka-R2, GluClalpha, chn, Galphaq, Cam, Rab6, Lar, Rab5, ct, RhoGAPp190, Dscam1, Hrb27C, Liprin-alpha, Nedd8, Ten-m, CG31126	Con, Imp, porin
Brain	I	negative regulation of multicellular organismal process	TRUE	2	GO:0051241	negative regulation of multicellular organismal process	BP	29	17	10	1.6	0.72	0.0087	0.042	Capr, stj, ena, Cip4, CadN, rin, Dlip3, WASp, brm, krz, CG5214, TSG101, chn, Galphaq, Ras85D, Tao, ed	nito, bun
Brain	I	integral component of plasma membrane	TRUE	2	GO:0005887	integral component of plasma membrane	CC	29	17	10	1.6	0.72	0.0087	0.042	5-HT1A, Arl6IP1, CadN, tutl, Octbeta2R, para, Octalpha2R, Nmdar2, Elk, PlexA, mGluR, Best1, pasi2, mtt, rdgB, Dscam1, Ten-m	Rab26, Gfrl
Brain	I	cell part morphogenesis	TRUE	1	GO:0032990	cell part morphogenesis	BP	96	56	34	1.6	0.71	1.9e-06	0.00024	dnc, Dref, Adf1, aay, d4, ringer, ena, E(bx), Wnk, GM130, jeb, smt3, Nrt, HmgD, CadN, RhoGAP100F, tau, tutl, shrb, bsk, WASp, brm, Fas1, Ptp69D, CG7154, nudC, porin, DCTN1-p150, CkIIalpha, metro, Nrg, dock, PlexA, SLO2, kis, Ank2, Scm, Pka-R2, GluClalpha, Hsc70-5, chn, Galphaq, Cam, Rab6, Lar, Rab5, ct, Letm1, RhoGAPp190, Dscam1, Mitofilin, Hrb27C, Liprin-alpha, Nedd8, Ten-m, CG31126
Brain	I	axon guidance	TRUE	3	GO:0007411	axon guidance	BP	43	25	15	1.6	0.71	0.0018	0.015	aay, ena, Wnk, jeb, Nrt, CadN, RhoGAP100F, tutl, bsk, Fas1, Ptp69D, CkIIalpha, Nrg, dock, PlexA, kis, Pka-R2, Galphaq, Cam, Rab6, Lar, Dscam1, Hrb27C, Liprin-alpha, Ten-m	Con, brm, ct
Brain	I	regulation of molecular function	TRUE	1	GO:0065009	regulation of molecular function	BP	43	25	15	1.6	0.71	0.0018	0.015	CG8243, 14-3-3zeta, Rgk3, smt3, endos, Pka-C1, CG42795, RhoGAP100F, CG7324, bsk, krz, Octbeta2R, Rab3-GEF, ens, CkIIalpha, alc, PlexA, Galphaq, Crag, Cam, Atx2, Dap160, blw, Crtc, Nedd8
Brain	I	metal ion transmembrane transporter activity	TRUE	1	GO:0046873	metal ion transmembrane transporter activity	MF	31	18	11	1.6	0.71	0.008	0.04	Nhe2, CG4587, stj, CG10804, brp, VGAT, VGlut, para, CG7708, Trpm, Elk, SLO2, PMCA, CG10444, GlyT, CG1090, Letm1, rdgB
Brain	I	molecular transducer activity	TRUE	1	GO:0060089	molecular transducer activity	MF	31	18	11	1.6	0.71	0.008	0.04	5-HT1A, Lectin-galC1, CadN, CG31760, Ptp69D, Cirl, Octbeta2R, Octalpha2R, Trpm, LBR, Nmdar2, Elk, PlexA, mGluR, GluClalpha, mtt, Lar, Dscam1
Brain	I	regulation of nervous system development	TRUE	1	GO:0051960	regulation of nervous system development	BP	57	33	20	1.6	0.7	0.00036	0.0057	Adf1, stj, ena, Cip4, GM130, CadN, tutl, bsk, dlg1, Eps-15, Dlip3, WASp, brm, CG5214, veli, nudC, Imp, Octbeta2R, atl, numb, Cul2, metro, PlexA, kis, Ank2, Lar, bun, Ras85D, Dap160, RhoGAPp190, Dscam1, Liprin-alpha, ed
Brain	I	regulation of transcription by RNA polymerase II	TRUE	2	GO:0006357	regulation of transcription by RNA polymerase II	BP	45	26	16	1.6	0.7	0.0016	0.015	mip120, Dref, Rsf1, SF2, Adf1, ATbp, E(bx), toy, Dlip3, brm, B52, CoRest, Nelf-A, Cul2, MED1, kis, row, chn, Mtor, Deaf1, Hsp83, CrebB, Ras85D, ct, Cf2, crol	atms, RpII15
Brain	I	axon	TRUE	2	GO:0030424	axon	CC	33	19	12	1.6	0.7	0.0073	0.038	sNPF, ena, Con, jeb, CadN, tau, Syn, bsk, dlg1, Ptp69D, Imp, cpx, par-1, Rab3-GEF, Csp, metro, Ank2, Lar, Dscam1	Pka-C1, mtt
Brain	I	developmental growth	TRUE	1	GO:0048589	developmental growth	BP	75	43	27	1.6	0.69	6e-05	0.0015	btsz, sNPF, dnc, Capr, stj, ena, Cip4, jeb, CadN, RhoGAP100F, rin, Syn, bsk, dlg1, Eps-15, WASp, veli, sqh, Imp, TSG101, cpx, Octbeta2R, par-1, chico, atl, DCTN1-p150, Nrx-1, Cul2, metro, Nrg, kis, Ank2, RpL22, Lar, bun, Rab5, Ras85D, Dap160, Tao, Dscam1, Liprin-alpha, ed, Ten-m
Brain	I	signal transducer activity	TRUE	1	GO:0004871	signal transducer activity	MF	35	20	12	1.6	0.68	0.0067	0.036	Nplp1, 5-HT1A, jeb, CG31760, bsk, Ptp69D, Cirl, Octbeta2R, Octalpha2R, Nmdar2, Elk, PlexA, mGluR, RhoGEF3, Galphaq, mtt, Lar, GckIII, Tao, Dscam1
Brain	I	mitotic cell cycle	TRUE	1	GO:0000278	mitotic cell cycle	BP	78	44	28	1.6	0.67	8.5e-05	0.0019	Lam, Chro, SF2, SmD2, Capr, pnut, 14-3-3zeta, E(bx), smt3, endos, prod, Kap-alpha3, shrb, dlg1, eIF4E1, pzg, brm, Non2, Rga, swm, B52, Mad1, sqh, vtd, Nelf-A, DCTN1-p150, CkIIalpha, pins, ph-d, SmD3, Mtor, Mnn1, Map205, Rab5, eIF4G1, Ras85D, Fs(2)Ket, ct, RpII15, Top2, crol, Ald, zip, mtm
Brain	I	regulation of developmental growth	TRUE	1	GO:0048638	regulation of developmental growth	BP	46	26	16	1.6	0.67	0.0025	0.019	btsz, sNPF, Capr, stj, ena, Cip4, CadN, rin, dlg1, Eps-15, WASp, veli, TSG101, Octbeta2R, chico, atl, Cul2, metro, kis, Ank2, RpL22, Lar, Ras85D, Tao, Liprin-alpha, ed
Brain	I	cation transport	TRUE	1	GO:0006812	cation transport	BP	39	22	14	1.6	0.67	0.0056	0.032	Fer2LCH, ATPsyndelta, Nhe2, Wnk, Rgk3, Vha68-1, Fer1HCH, para, Trpm, ATPsynE, VhaSFD, Elk, SLO2, PMCA, Vha44, Cam, CG1090, ATPsynF, Atox1, blw, Vha55, Letm1
Brain	I	chromosome	TRUE	1	GO:0005694	chromosome	CC	72	40	26	1.6	0.64	0.00029	0.0048	mtSSB, Pep, mip120, Chro, Dref, Adf1, CG4747, Hcs, CG6664, Hrb98DE, smt3, Rm62, D1, TFAM, HmgD, prod, sqd, HP5, Dlip3, pzg, B52, Mad1, His1:CG33855, CG7379, vtd, DCTN1-p150, row, ph-d, Scm, CG11970, atms, Mtor, His2Av, Deaf1, Hsp83, CG18004, Sap130, wapl, Top2, RPA3
Brain	I	Ras protein signal transduction	TRUE	2	GO:0007265	Ras protein signal transduction	BP	38	21	14	1.6	0.64	0.0092	0.043	14-3-3zeta, Efa6, smt3, RhoGAP100F, Sf3a2, rin, RhoGAP1A, Rab2, Rab26, Rab3-GEF, PlexA, RapGAP1, RhoGEF3, Cdep, Ras64B, Crag, CG10188, Rab6, Rab5, siz, RhoGAPp190	CG8500, Rgk3, strat, Ras85D
Brain	I	cell maturation	TRUE	2	GO:0048469	cell maturation	BP	38	21	14	1.6	0.64	0.0092	0.043	14-3-3zeta, Pka-C1, shrb, sqd, bsk, heph, gus, Imp, par-1, vtd, CkIIalpha, kis, glo, SmD3, bic, Hsp83, Rab6, tral, Ras85D, btz, Hrb27C	Efa6, ple, Nrg
Brain	I	growth	TRUE	1	GO:0040007	growth	BP	93	51	33	1.5	0.63	6.2e-05	0.0015	btsz, sNPF, dnc, Capr, stj, ena, Cip4, jeb, CadN, RhoGAP100F, rin, Syn, shrb, Hcf, bsk, dlg1, Eps-15, eIF4E1, WASp, veli, sqh, Imp, TSG101, cpx, Octbeta2R, par-1, chico, Trpm, atl, DCTN1-p150, Nrx-1, Cul2, metro, hfp, Nrg, kis, Ank2, Scm, RpL22, Lar, bun, Rab5, Ras85D, Dap160, blw, puf, Tao, Dscam1, Liprin-alpha, ed, Ten-m
Brain	I	synapse organization	TRUE	1	GO:0050808	synapse organization	BP	58	32	21	1.5	0.63	0.0014	0.013	Adf1, Prosap, stj, ena, Cip4, jeb, brp, RhoGAP100F, Syn, dlg1, Eps-15, WASp, Frq2, veli, Imp, cpx, Octbeta2R, par-1, atl, Nrx-1, Cul2, metro, Nrg, kis, mGluR, Ank2, CrebB, Lar, Atx2, Dap160, Liprin-alpha, Ten-m
Brain	I	positive regulation of gene expression	TRUE	1	GO:0010628	positive regulation of gene expression	BP	40	22	14	1.5	0.63	0.0083	0.041	Dref, Adf1, ATbp, nito, Hrb98DE, TFAM, rin, toy, Hcf, Dlip3, brm, swm, CoRest, vtd, atms, chn, Mtor, Deaf1, CrebB, Atx2, Cf2, Hrb27C
Brain	I	regulation of signaling	TRUE	2	GO:0023051	regulation of signaling	BP	130	71	46	1.5	0.62	2.2e-06	0.00024	sNPF, dnc, Nplp1, nito, Sap47, 14-3-3zeta, Efa6, E(bx), Wnk, jeb, smt3, brp, Pka-C1, Tomosyn, Fife, Sf3a2, Vha68-1, Chmp1, shrb, Snx3, bsk, RhoGAP1A, Eps-15, pzg, brm, Frq2, krz, swm, Spred, eIF4B, TSG101, cpx, par-1, lgs, CoRest, chico, Rab3-GEF, CkIIalpha, p24-1, Csp, Nrx-1, numb, Cul2, dock, mGluR, RapGAP1, Ank2, syd, RhoGEF3, glo, Gprk1, Cdep, nst, Mnn1, Galphaq, Crag, CG10188, Cam, bun, Ras8…
Brain	I	mitotic cell cycle process	TRUE	1	GO:1903047	mitotic cell cycle process	BP	64	35	23	1.5	0.62	0.001	0.011	Lam, Chro, SF2, SmD2, pnut, E(bx), smt3, endos, prod, Kap-alpha3, shrb, dlg1, eIF4E1, brm, Non2, Rga, B52, Mad1, sqh, vtd, Nelf-A, DCTN1-p150, CkIIalpha, pins, SmD3, Mtor, Mnn1, Rab5, eIF4G1, Ras85D, Fs(2)Ket, RpII15, Top2, Ald, zip
Brain	I	chromosomal part	TRUE	1	GO:0044427	chromosomal part	CC	55	30	20	1.5	0.62	0.0025	0.019	Pep, mip120, Chro, Adf1, CG4747, Hrb98DE, smt3, Rm62, D1, HmgD, prod, sqd, HP5, pzg, B52, Mad1, His1:CG33855, CG7379, vtd, DCTN1-p150, row, ph-d, CG11970, atms, Mtor, His2Av, Hsp83, CG18004, Sap130, RPA3
Brain	I	regulation of growth	TRUE	1	GO:0040008	regulation of growth	BP	61	33	22	1.5	0.61	0.0018	0.015	btsz, sNPF, Capr, stj, ena, Cip4, CadN, rin, shrb, Hcf, dlg1, Eps-15, eIF4E1, WASp, veli, TSG101, Octbeta2R, chico, atl, Cul2, metro, hfp, kis, Ank2, Scm, RpL22, Lar, bun, Ras85D, puf, Tao, Liprin-alpha, ed
Brain	I	ion transport	TRUE	1	GO:0006811	ion transport	BP	57	31	20	1.5	0.61	0.0023	0.018	Fer2LCH, ATPsyndelta, Nhe2, NaPi-III, Wnk, Rgk3, Vha68-1, Fer1HCH, VGlut, para, Trpm, porin, ATPsynE, VhaSFD, Nmdar2, Elk, SLO2, PMCA, Best1, Vha44, GluClalpha, CG3638, GlyT, Cam, CG1090, Dic1, ATPsynF, Atox1, blw, Vha55, Letm1
Brain	I	regulation of signal transduction	TRUE	1	GO:0009966	regulation of signal transduction	BP	110	60	40	1.5	0.59	3.4e-05	0.0011	sNPF, dnc, Nplp1, nito, 14-3-3zeta, Efa6, E(bx), Wnk, jeb, smt3, Pka-C1, Sf3a2, Vha68-1, Chmp1, shrb, Snx3, bsk, RhoGAP1A, Eps-15, pzg, brm, krz, swm, Spred, eIF4B, TSG101, par-1, lgs, CoRest, chico, Rab3-GEF, CkIIalpha, numb, Cul2, dock, RapGAP1, syd, RhoGEF3, glo, Gprk1, Cdep, nst, Mnn1, Galphaq, Crag, CG10188, Cam, bun, Ras85D, ct, Dap160, RagC-D, siz, puf, crol, Tao, rdgB, Su(dx), Nedd8, ed
Brain	I	RNA binding	TRUE	1	GO:0003723	RNA binding	MF	110	60	40	1.5	0.59	3.4e-05	0.0011	Pep, scaf6, Rsf1, Ref1, SF2, SmD2, Capr, nito, nonA, Hrb98DE, Nab2, elav, Rm62, fne, Sf3a2, rin, CG7903, sqd, eIF4E1, CG9344, CG7564, CG4612, heph, swm, B52, eIF4B, Imp, CG34354, bru3, snRNP-U1-70K, qkr58E-2, Prp3, Nelf-A, CG15432, Psi, SF1, hfp, yps, qkr54B, CG4611, bol, eIF5, SmD1, cpo, glo, SmD3, mod, eIF1A, eIF1, SmB, Zn72D, eIF4G1, Top2, CG4887, Pur-alpha, CG6094, NHP2, CG30122, btz, Hrb27C
Brain	I	taxis	TRUE	1	GO:0042330	taxis	BP	60	32	21	1.5	0.59	0.0029	0.021	aay, nonA, ena, Wnk, Con, jeb, Nrt, CadN, RhoGAP100F, tutl, bsk, dlg1, brm, Fas1, Ptp69D, ple, Ace, CkIIalpha, Nrg, dock, PlexA, kis, Pka-R2, Galphaq, Cam, Rab6, Lar, ct, Dscam1, Hrb27C, Liprin-alpha, Ten-m
Brain	I	cell projection organization	TRUE	1	GO:0030030	cell projection organization	BP	120	61	41	1.5	0.58	4.4e-05	0.0012	dnc, Dref, Adf1, aay, d4, ringer, ena, Cip4, E(bx), Wnk, Con, GM130, jeb, smt3, Nrt, HmgD, CadN, RhoGAP100F, tau, tutl, shrb, bsk, WASp, brm, Fas1, Ptp69D, CG7154, sqh, nudC, Imp, par-1, porin, DCTN1-p150, CkIIalpha, metro, Nrg, dock, PlexA, SLO2, kis, Ank2, Scm, Pka-R2, GluClalpha, chn, Galphaq, Cam, cmb, Rab6, Lar, Rab5, ct, RhoGAPp190, Dscam1, zip, Hrb27C, Liprin-alpha, Nedd8, Ten-m, CG31126, …
Brain	I	synaptic signaling	TRUE	4	GO:0099536	synaptic signaling	BP	66	35	23	1.5	0.58	0.0021	0.017	dnc, Sap47, Syt7, stj, Snap29, unc-13-4A, jeb, brp, Pka-C1, Tomosyn, Fife, Rbp, Nlg4, Syn, dlg1, Eps-15, Frq2, Cirl, cpx, VGlut, Ace, para, chico, EndoA, Rab3-GEF, Csp, Nrx-1, CanB2, mGluR, Ank2, cpo, Galphaq, Dap160, Letm1, X11L
Brain	I	cell fate commitment	TRUE	1	GO:0045165	cell fate commitment	BP	57	30	20	1.5	0.57	0.0052	0.032	dnc, Lam, klg, 14-3-3zeta, E(bx), jeb, tau, rin, tutl, dlg1, WASp, Rga, Ptp69D, par-1, DCTN1-p150, CkIIalpha, pins, numb, bol, chn, Hsp83, Cam, bun, Ras85D, ct, ATPsynF, crol, zip, Hrb27C, ed
Brain	I	regulation of response to stimulus	TRUE	1	GO:0048583	regulation of response to stimulus	BP	140	75	51	1.5	0.56	8.6e-06	0.00051	sNPF, dnc, Lam, Nplp1, nito, 14-3-3zeta, Efa6, E(bx), Wnk, jeb, smt3, Rm62, CG32795, Pka-C1, mtd, CadN, Sf3a2, Vha68-1, Chmp1, shrb, Snx3, bsk, RhoGAP1A, Eps-15, pzg, brm, krz, heph, swm, Spred, eIF4B, Imp, TSG101, par-1, lgs, CoRest, chico, Rab3-GEF, CkIIalpha, Csp, numb, Cul2, dock, PlexA, RapGAP1, syd, RhoGEF3, glo, Gprk1, Cdep, nst, Mnn1, iPLA2-VIA, Galphaq, Deaf1, Crag, CG10188, Cam, Lar, bu…
Brain	I	imaginal disc morphogenesis	TRUE	4	GO:0007560	imaginal disc morphogenesis	BP	65	34	23	1.5	0.56	0.0034	0.023	EloB, CG6767, Cip4, Pka-C1, Ppcs, mtd, bsk, dlg1, brm, heph, sqh, svr, par-1, vlc, lgs, l(3)neo38, SF1, Nrg, kis, bol, Gprk1, Mnn1, cmb, bun, Rab5, Ras85D, ct, sds22, siz, crol, Got1, zip, Su(dx), ed	btsz, Lam, TSG101, GckIII
Brain	I	regionalization	TRUE	2	GO:0003002	regionalization	BP	66	34	23	1.5	0.54	0.0046	0.029	EloB, nito, ena, smt3, Pka-C1, rin, CG8149, sqd, Dlip3, WASp, brm, gus, sqh, par-1, lgs, fs(1)M3, CkIIalpha, numb, kis, glo, SmD3, Gprk1, bic, Hsp83, Rab6, bun, Rab5, tral, Ras85D, ct, btz, zip, Hrb27C, Su(dx)	14-3-3zeta, CadN, bsk, heph
Brain	I	compound eye development	TRUE	2	GO:0048749	compound eye development	BP	64	33	23	1.5	0.54	0.0052	0.032	Lam, Dref, klg, Nhe2, nito, 14-3-3zeta, ena, Hrb98DE, jeb, Pka-C1, CadN, RhoGAP100F, tau, rin, tutl, toy, Dlip3, snama, DCTN1-p150, CkIIalpha, Scm, chn, Galphaq, Hsp83, Cam, Rab6, Lar, bun, Ras85D, Atx2, Liprin-alpha, Ten-m, X11L
Brain	I	generation of neurons	TRUE	1	GO:0048699	generation of neurons	BP	150	77	53	1.4	0.53	1.8e-05	0.00071	dnc, Dref, Adf1, klg, aay, d4, ringer, 14-3-3zeta, ena, Cip4, E(bx), Wnk, Con, GM130, jeb, smt3, Nrt, HmgD, CadN, RhoGAP100F, tau, rin, tutl, shrb, bsk, dlg1, Dlip3, WASp, brm, CG5214, Fas1, Ptp69D, hig, CG7154, sqh, nudC, Imp, par-1, vtd, DCTN1-p150, CkIIalpha, pins, numb, metro, Nrg, dock, PlexA, SLO2, kis, Ank2, Scm, Pka-R2, GluClalpha, SmD3, chn, Galphaq, Hsp83, Cam, cmb, Rab6, Lar, bun, Rab5…
Brain	I	neuron differentiation	TRUE	1	GO:0030182	neuron differentiation	BP	140	71	49	1.4	0.53	3.8e-05	0.0011	dnc, Dref, Adf1, klg, aay, d4, ringer, 14-3-3zeta, ena, Cip4, E(bx), Wnk, Con, GM130, jeb, smt3, Nrt, HmgD, CadN, RhoGAP100F, tau, rin, tutl, shrb, bsk, Dlip3, WASp, brm, Fas1, Ptp69D, hig, CG7154, sqh, nudC, Imp, par-1, vtd, DCTN1-p150, CkIIalpha, metro, Nrg, dock, PlexA, SLO2, kis, Ank2, Scm, Pka-R2, GluClalpha, SmD3, chn, Galphaq, Hsp83, Cam, cmb, Rab6, Lar, bun, Rab5, Ras85D, ct, Atx2, CG5758…
Brain	I	neuron development	TRUE	1	GO:0048666	neuron development	BP	120	60	42	1.4	0.52	0.00025	0.0044	dnc, Dref, Adf1, aay, d4, ringer, ena, E(bx), Wnk, Con, GM130, jeb, smt3, Nrt, HmgD, CadN, RhoGAP100F, tau, tutl, shrb, bsk, Dlip3, WASp, brm, Fas1, Ptp69D, hig, CG7154, nudC, Imp, vtd, DCTN1-p150, CkIIalpha, metro, Nrg, dock, PlexA, SLO2, kis, Ank2, Scm, Pka-R2, GluClalpha, chn, Galphaq, Cam, Rab6, Lar, Rab5, Ras85D, ct, Atx2, CG5758, RhoGAPp190, Dscam1, Hrb27C, Liprin-alpha, Nedd8, Ten-m, CG311…
Brain	I	regulation of multicellular organismal development	TRUE	1	GO:2000026	regulation of multicellular organismal development	BP	92	47	33	1.4	0.52	0.0011	0.011	Dref, Adf1, Capr, stj, ena, Cip4, GM130, Pka-C1, CadN, rin, tutl, bsk, dlg1, Eps-15, Dlip3, eIF4E1, WASp, brm, krz, CG5214, veli, nudC, Imp, ple, TSG101, Octbeta2R, par-1, atl, numb, Cul2, metro, Pp2B-14D, PlexA, kis, Ank2, chn, bic, Galphaq, Lar, bun, Ras85D, Dap160, RhoGAPp190, Dscam1, Hrb27C, Liprin-alpha, ed
Brain	I	nucleoplasm	TRUE	1	GO:0005654	nucleoplasm	CC	57	29	20	1.4	0.52	0.011	0.05	Ref1, EloB, elav, CG1910, Dek, sqd, Hcf, Dlip3, B52, Mad1, CG7379, Nelf-A, CG15432, MED1, kis, atms, Mtor, Mnn1, Sap130, Cam, eIF1A, SmB, Fs(2)Ket, CG14207, RpII15, CG6340, Nlp, DMAP1, Hrb27C
Brain	I	nuclear lumen	TRUE	1	GO:0031981	nuclear lumen	CC	85	43	30	1.4	0.51	0.0023	0.018	Lam, Ref1, EloB, elav, smt3, HmgD, prod, CG1910, Dek, sqd, Hcf, Dlip3, Non2, B52, Mad1, His1:CG33855, CG7379, vtd, Nelf-A, CG15432, MED1, kis, ph-d, CG11970, atms, Mtor, Mnn1, CG18004, Sap130, mod, Cam, eIF1A, SmB, Fs(2)Ket, CG14207, RpII15, CG6340, Nlp, DMAP1, RPA3, FK506-bp1, NHP2, Hrb27C
Brain	I	post-embryonic animal organ development	TRUE	1	GO:0048569	post-embryonic animal organ development	BP	75	38	27	1.4	0.51	0.0041	0.026	EloB, CG6767, Cip4, Pka-C1, Ppcs, mtd, CG8149, crp, bsk, dlg1, brm, krz, heph, sqh, svr, par-1, vlc, lgs, l(3)neo38, SF1, Nrg, kis, bol, Gprk1, chn, Mnn1, cmb, bun, Rab5, Ras85D, ct, sds22, siz, crol, Got1, zip, Su(dx), ed
Brain	I	positive regulation of macromolecule metabolic process	TRUE	2	GO:0010604	positive regulation of macromolecule metabolic process	BP	65	33	23	1.4	0.51	0.007	0.037	sNPF, Dref, Adf1, ATbp, nito, 14-3-3zeta, Hrb98DE, jeb, smt3, TFAM, Sf3a2, rin, toy, Hcf, Dlip3, brm, krz, swm, gus, CoRest, Rab3-GEF, vtd, atms, chn, Mtor, Mnn1, Deaf1, CrebB, Ras85D, Atx2, Dap160, Cf2, Hrb27C	Octbeta2R, PlexA
Brain	I	regulation of developmental process	TRUE	1	GO:0050793	regulation of developmental process	BP	120	60	43	1.4	0.48	0.00061	0.0078	btsz, sNPF, Dref, Adf1, Capr, nito, stj, ena, Cip4, GM130, Pka-C1, CadN, rin, tutl, bsk, dlg1, Eps-15, Dlip3, eIF4E1, WASp, brm, krz, CG5214, Vrp1, veli, nudC, Imp, ple, TSG101, Octbeta2R, par-1, chico, porin, atl, numb, Cul2, metro, Pp2B-14D, PlexA, kis, Ank2, cpo, chn, bic, Galphaq, Hsp83, RpL22, Lar, bun, Ras85D, Fs(2)Ket, Dap160, Tao, RhoGAPp190, Dscam1, zip, Hrb27C, Liprin-alpha, ed, Ten-m
Brain	I	cell morphogenesis	TRUE	1	GO:0000902	cell morphogenesis	BP	130	62	45	1.4	0.47	0.00064	0.0079	dnc, Dref, Adf1, aay, d4, ringer, ena, E(bx), Wnk, GM130, jeb, smt3, Nrt, HmgD, Ppcs, CadN, RhoGAP100F, tau, tutl, shrb, bsk, WASp, brm, Vrp1, Fas1, Ptp69D, CG7154, sqh, nudC, par-1, chico, porin, DCTN1-p150, CkIIalpha, metro, Nrg, dock, PlexA, SLO2, kis, Ank2, Scm, Pka-R2, GluClalpha, chn, Galphaq, Hsp83, Cam, Rab6, Lar, Rab5, Ras85D, Fs(2)Ket, ct, RhoGAPp190, Dscam1, Hrb27C, Liprin-alpha, Nedd8…
Brain	I	regulation of multicellular organismal process	TRUE	1	GO:0051239	regulation of multicellular organismal process	BP	120	60	43	1.4	0.47	0.00081	0.0092	btsz, Tk, sNPF, Dref, Adf1, Capr, 5-HT1A, stj, ena, Cip4, GM130, Pka-C1, CadN, rin, tutl, Proc, bsk, dlg1, Eps-15, Dlip3, eIF4E1, WASp, brm, krz, CG5214, veli, nudC, Imp, ple, TSG101, Octbeta2R, par-1, chico, atl, p24-1, numb, Cul2, metro, Pp2B-14D, PlexA, kis, Ank2, cpo, chn, bic, Galphaq, Hsp83, CrebB, RpL22, Lar, bun, Ras85D, Atx2, Dap160, Tao, RhoGAPp190, Dscam1, Hrb27C, Liprin-alpha, ed
Brain	I	instar larval or pupal morphogenesis	TRUE	3	GO:0048707	instar larval or pupal morphogenesis	BP	77	38	27	1.4	0.47	0.0072	0.037	CG7860, EloB, CG6767, Cip4, Pka-C1, Ppcs, mtd, CG8149, bsk, dlg1, eIF4E1, brm, heph, sqh, svr, par-1, vlc, lgs, l(3)neo38, SF1, Nrg, kis, bol, Gprk1, Mnn1, Cam, cmb, bun, Rab5, Ras85D, ct, sds22, siz, crol, Got1, zip, Su(dx), ed	Chro, btsz
Brain	I	cellular localization	TRUE	1	GO:0051641	cellular localization	BP	150	73	53	1.4	0.46	0.00024	0.0043	btsz, Lam, Chro, Syt7, stj, ena, CG6664, Cip4, Roe1, Snap29, unc-13-4A, smt3, Ykt6, brp, Pka-C1, Ppcs, Tomosyn, RhoGAP100F, Fife, Kap-alpha3, Syn, Snx3, CG13887, sqd, dlg1, Eps-15, WASp, Frq2, swm, Mad1, sqh, Cirl, nudC, cpx, par-1, CG3529, EndoA, Rab3-GEF, DCTN1-p150, ens, CkIIalpha, Csp, Nrx-1, pins, numb, Acn, CanB2, Ank2, syd, glo, SmD3, Nup214, Mtor, His2Av, bic, Crag, Hsp83, Cam, Rab6, Rab5…
Brain	I	regulation of cellular component organization	TRUE	1	GO:0051128	regulation of cellular component organization	BP	130	65	47	1.4	0.46	0.0006	0.0078	Chro, Rsf1, SF2, Adf1, stj, ena, Cip4, Snap29, GM130, smt3, endos, Pka-C1, CadN, tutl, dlg1, Eps-15, eIF4E1, WASp, Vrp1, B52, Mad1, veli, sqh, nudC, Imp, Octbeta2R, par-1, CoRest, chico, porin, atl, Prp3, Ibf1, Nrx-1, numb, l(3)neo38, Cul2, metro, hfp, PlexA, kis, Ank2, bol, Mtor, bic, Crag, Hsp83, Lar, bun, Rab5, Ras85D, Fs(2)Ket, Atx2, puf, crol, Pur-alpha, EndoB, Tao, RhoGAPp190, Dscam1, zip, …
Brain	I	sensory organ development	TRUE	1	GO:0007423	sensory organ development	BP	82	40	29	1.4	0.46	0.0076	0.038	Fer2LCH, Lam, Dref, Sam-S, klg, Nhe2, nito, 14-3-3zeta, ena, Hrb98DE, jeb, Pka-C1, Ppcs, CadN, RhoGAP100F, tau, rin, tutl, toy, Dlip3, WASp, snama, DCTN1-p150, CkIIalpha, numb, Scm, chn, Galphaq, Hsp83, Cam, Rab6, Lar, bun, Ras85D, ct, Atx2, Liprin-alpha, ed, Ten-m, X11L
Brain	I	cellular component morphogenesis	TRUE	1	GO:0032989	cellular component morphogenesis	BP	150	72	53	1.4	0.45	0.00035	0.0057	dnc, mip120, Dref, Adf1, aay, d4, ringer, fln, ena, E(bx), Wnk, GM130, jeb, smt3, Nrt, HmgD, Ppcs, CadN, RhoGAP100F, tau, tutl, shrb, bsk, WASp, brm, Vrp1, Fas1, Ptp69D, gus, CG7154, sqh, nudC, par-1, chico, porin, DCTN1-p150, fs(1)M3, CkIIalpha, metro, Nrg, dock, PlexA, SLO2, CanB2, kis, Ank2, Scm, Pka-R2, GluClalpha, Hsc70-5, chn, Galphaq, Hsp83, Cam, Rab6, Lar, bun, Rab5, Ras85D, Fs(2)Ket, ct,…
Brain	I	animal organ morphogenesis	TRUE	1	GO:0009887	animal organ morphogenesis	BP	140	69	50	1.4	0.45	0.00049	0.0069	CG7860, btsz, Lam, Dref, EloB, klg, Nhe2, CG6767, 14-3-3zeta, ena, Cip4, Hrb98DE, jeb, Pka-C1, Ppcs, mtd, CadN, RhoGAP100F, tau, rin, tutl, CG8149, toy, bsk, dlg1, Dlip3, eIF4E1, WASp, brm, heph, sqh, svr, TSG101, par-1, vlc, lgs, snama, DCTN1-p150, Csp, numb, l(3)neo38, SF1, Nrg, kis, bol, Gprk1, chn, Mnn1, Galphaq, Hsp83, Cam, cmb, Rab6, Lar, bun, Rab5, Ras85D, ct, sds22, Atx2, siz, GckIII, cro…
Brain	I	cellular component assembly	TRUE	1	GO:0022607	cellular component assembly	BP	170	80	59	1.4	0.44	0.00023	0.0043	btsz, Cep97, mip120, Rsf1, SF2, Adf1, pnut, fln, Prosap, stj, ena, Cip4, E(bx), unc-13-4A, jeb, smt3, Pka-C1, Ppcs, Tomosyn, Syn, sqd, bsk, dlg1, Eps-15, WASp, CG7564, Non2, Vrp1, B52, gus, veli, sqh, eIF4B, Imp, TSG101, cpx, Octbeta2R, par-1, His1:CG33855, Trpm, porin, atl, DCTN1-p150, ens, fs(1)M3, Nrx-1, Cul2, metro, hfp, Nrg, CanB2, kis, Ank2, pasi2, glo, SmD3, Nup214, Mtor, bic, Crag, Hsp83,…
Brain	I	cell-cell signaling	TRUE	1	GO:0007267	cell-cell signaling	BP	110	55	41	1.4	0.44	0.0024	0.018	dnc, Lam, nito, Sap47, Syt7, stj, E(bx), Wnk, Snap29, unc-13-4A, jeb, brp, Pka-C1, Tomosyn, tau, Fife, Rbp, Nlg4, Syn, tutl, Snx3, bsk, dlg1, Eps-15, Frq2, Rga, Ptp69D, Cirl, cpx, VGlut, par-1, Ace, para, lgs, chico, EndoA, Rab3-GEF, CkIIalpha, p24-1, Csp, Nrx-1, CanB2, mGluR, Ank2, bol, cpo, Galphaq, Cam, Dap160, ATPsynF, crol, Letm1, Hrb27C, ed, X11L
Brain	I	movement of cell or subcellular component	TRUE	1	GO:0006928	movement of cell or subcellular component	BP	91	44	32	1.4	0.44	0.0063	0.035	mip120, aay, ena, Wnk, jeb, Nrt, Ppcs, CadN, RhoGAP100F, tutl, CG11178, sqd, bsk, WASp, brm, Fas1, Ptp69D, veli, sqh, ple, par-1, DCTN1-p150, ens, CkIIalpha, numb, Nrg, dock, PlexA, kis, syd, Pka-R2, Galphaq, Cam, Rab6, Lar, bun, Rab5, Ras85D, ct, Dscam1, zip, Hrb27C, Liprin-alpha, Ten-m
Brain	I	intracellular signal transduction	TRUE	1	GO:0035556	intracellular signal transduction	BP	98	47	35	1.3	0.43	0.0058	0.032	sNPF, dnc, Nplp1, CG8500, 14-3-3zeta, Efa6, E(bx), Rgk3, jeb, smt3, Pka-C1, RhoGAP100F, Sf3a2, rin, bsk, RhoGAP1A, Rab2, CG14408, Rab26, pzg, brm, strat, gus, eIF4B, TSG101, par-1, Rab3-GEF, CkIIalpha, Elk, PlexA, RapGAP1, syd, RhoGEF3, glo, Cdep, Mnn1, Ras64B, Crag, CG10188, Rab6, Rab5, Ras85D, RagC-D, siz, Tao, RhoGAPp190, ed
Brain	I	cell cycle	TRUE	1	GO:0007049	cell cycle	BP	120	58	43	1.3	0.42	0.0028	0.02	Lam, Cep97, Chro, Dref, SF2, SmD2, Capr, pnut, 14-3-3zeta, CG6664, E(bx), smt3, endos, prod, Kap-alpha3, RpL28, shrb, Ubc6, dlg1, eIF4E1, pzg, brm, Non2, Rga, swm, B52, Mad1, sqh, Rab3-GEF, vtd, Nelf-A, DCTN1-p150, ens, CkIIalpha, pins, hfp, Pp2B-14D, CanB2, ph-d, bol, SmD3, Mtor, Mnn1, Hsp83, Cam, Map205, Rab5, eIF4G1, Ras85D, Fs(2)Ket, ct, wapl, RpII15, Top2, crol, Ald, zip, mtm
Brain	I	protein-containing complex subunit organization	TRUE	1	GO:0043933	protein-containing complex subunit organization	BP	120	55	41	1.3	0.42	0.0039	0.026	Lam, Chro, Rsf1, SF2, fln, Hcs, Cip4, E(bx), unc-13-4A, HmgD, Tomosyn, Hcf, eIF4E1, WASp, pzg, CG7564, brm, Vrp1, B52, sqh, eIF4B, His1:CG33855, CoRest, Trpm, atl, Prp3, DCTN1-p150, ens, Ibf1, Csp, l(3)neo38, hfp, CanB2, ph-d, atms, Nup214, Mtor, Mnn1, His2Av, Hsp83, Cam, Rab5, Fs(2)Ket, Atx2, Top2, Nlp, CG11722, crol, DMAP1, Pur-alpha, FK506-bp1, CG6094, Crtc, CG8549, zip
Brain	I	sensory perception of pain	TRUE	1	GO:0019233	sensory perception of pain	BP	100	48	36	1.3	0.42	0.0067	0.036	Tk, Pep, Ref1, SF2, CG4587, CG32278, stj, 4E-T, Hrb98DE, E(bx), unc-13-4A, brp, TFAM, fne, VGAT, CG42795, CadN, Sf3a2, tutl, crp, dlg1, Rab2, Eps-15, CG4612, Rga, qkr58E-2, CG7708, Swip-1, Ibf1, Psi, l(3)neo38, PlexA, Ank2, Vha44, syd, CNPYb, Gfrl, glo, atms, His2Av, CG7946, wapl, CG4887, blw, CG6340, Tao, mRpL24, Ten-m
Brain	I	establishment of localization in cell	TRUE	1	GO:0051649	establishment of localization in cell	BP	120	56	43	1.3	0.38	0.007	0.037	btsz, Lam, Chro, Syt7, stj, ena, CG6664, Roe1, Snap29, unc-13-4A, smt3, Ykt6, brp, Ppcs, Tomosyn, Fife, Kap-alpha3, Syn, Snx3, CG13887, sqd, dlg1, Eps-15, WASp, Frq2, swm, Mad1, sqh, Cirl, nudC, cpx, CG3529, EndoA, Rab3-GEF, DCTN1-p150, ens, Csp, Nrx-1, pins, Acn, CanB2, syd, Nup214, Mtor, Cam, Rab5, tral, Ras85D, Fs(2)Ket, CanA-14F, Dap160, Top2, Letm1, blp, Liprin-alpha, X11L
Brain	I	plasma membrane	TRUE	1	GO:0005886	plasma membrane	CC	160	71	55	1.3	0.36	0.004	0.026	Ama, btsz, klg, pnut, CG42748, Flo2, 5-HT1A, 14-3-3zeta, stj, Cip4, Con, Rgk3, brp, Arl6IP1, Nrt, Pka-C1, CadN, Vha68-1, tutl, dlg1, Rab2, Rab26, Fas1, Ptp69D, CG42258, veli, sqh, Octbeta2R, par-1, Ace, para, Octalpha2R, Swip-1, fs(1)M3, Csp, CG8176, Nrx-1, VhaSFD, Nmdar2, metro, Elk, Nrg, PlexA, PMCA, mGluR, Best1, Ank2, Vha44, Pka-R2, GluClalpha, Gfrl, pasi2, Gprk1, Galphaq, Crag, Hsp83, CG3638…
Brain	I	germ cell development	TRUE	2	GO:0007281	germ cell development	BP	130	58	45	1.3	0.36	0.0086	0.042	dnc, mip120, 14-3-3zeta, ena, Cip4, Hrb98DE, smt3, endos, Pka-C1, Ppcs, rin, shrb, sqd, bsk, dlg1, eIF4E1, WASp, brm, heph, Vrp1, gus, veli, sqh, nudC, TSG101, par-1, chico, porin, DCTN1-p150, fs(1)M3, CkIIalpha, Cul2, hfp, yps, kis, Scm, glo, SmD3, bic, Hsp83, mod, Rab6, Lar, SmB, bun, Rab5, tral, eIF4G1, Ras85D, Fs(2)Ket, ct, Atx2, blw, Tao, btz, zip, Hrb27C, ed	E(bx), bol, EndoB
Brain	II	cytosolic ribosome	TRUE	3	GO:0022626	cytosolic ribosome	CC	44	36	11	3.3	1.7	7.3e-16	1.9e-13	RpS23, RpL36, RpS14a, RpL27A, RpS10b, RpL34a, RpS27A, RpS25, RpS18, RpLP1, RpS20, RpL5, RpL7A, RpS4, RpL6, RpL26, RpL11, RpS7, RpL35, RpL18A, RpS8, RpS16, RpS11, RpL27, RpL36A, RpL32, RpS3A, RpL13, RpS24, RpLP2, RpL34b, RpL15, RpL23, RpLP0-like, sta, RpL31	Eno
Brain	II	ribosomal subunit	TRUE	4	GO:0044391	ribosomal subunit	CC	59	43	15	2.9	1.6	1.9e-15	2.4e-13	RpS23, RpL36, RpS14a, RpL27A, RpS10b, RpL34a, RpS27A, RpS25, RpS18, RpLP1, RpS20, RpL5, RpL7A, RpS4, RpL6, RpL26, RpL11, RpS7, mRpS26, RpL35, RpL18A, RpS8, RpS16, RpS11, RpL27, mRpL44, RpL36A, RpL32, RpS3A, RpL13, RpS24, mRpL37, RpLP2, RpL34b, RpL15, bonsai, RpL23, mRpL39, mRpL49, RpLP0-like, sta, mRpS14, RpL31	vkg, cora, epsilonCOP, apolpp, Sec31
Brain	II	translation	TRUE	3	GO:0006412	translation	BP	110	61	27	2.3	1.2	1.4e-13	1.2e-11	RpS23, eEF1gamma, RpL36, UK114, RpS14a, RpL27A, RpS10b, AlaRS, RpL34a, RpS27A, RpS25, eEF1alpha1, RpS18, AsnRS, RpLP1, MetRS, RpS20, CG7414, RpL5, eIF3c, RpL7A, RpS4, RpL6, RpL26, RpL11, RpS7, mRpS26, RpL35, RpL18A, RpS8, RpS16, RpS11, RpL27, mRpL44, eIF3g1, Dp1, Hsp67Bc, RpL36A, GlnRS, RpL32, alpha-PheRS, eEF1beta, RpS3A, RpL13, RpS24, mRpL37, RpLP2, TyrRS, RpL34b, RpL15, bonsai, AsnRS-m, RpL23,…	Gclm
Brain	II	peptide metabolic process	TRUE	2	GO:0006518	peptide metabolic process	BP	120	67	31	2.2	1.1	2.2e-13	1.5e-11	RpS23, eEF1gamma, RpL36, UK114, RpS14a, RpL27A, RpS10b, AlaRS, RpL34a, RpS27A, GstE12, GstO3, RpS25, eEF1alpha1, RpS18, AsnRS, RpLP1, MetRS, RpS20, Gclm, GstO2, CG7414, RpL5, eIF3c, RpL7A, RpS4, RpL6, RpL26, RpL11, RpS7, GstE7, mRpS26, RpL35, RpL18A, RpS8, RpS16, RpS11, RpL27, mRpL44, eIF3g1, Dp1, Hsp67Bc, RpL36A, GlnRS, RpL32, alpha-PheRS, eEF1beta, RpS3A, RpL13, RpS24, mRpL37, RpLP2, TyrRS, RpL…
Brain	II	cytosolic large ribosomal subunit	TRUE	2	GO:0022625	cytosolic large ribosomal subunit	CC	25	21	6.2	3.4	1.8	5e-10	2.6e-08	RpL36, RpL27A, RpL34a, RpLP1, RpL5, RpL7A, RpL6, RpL26, RpL11, RpL35, RpL18A, RpL27, RpL36A, RpL32, RpL13, RpLP2, RpL34b, RpL15, RpL23, RpLP0-like, RpL31	mRpL44, mRpL37, mRpL39, mRpL49
Brain	II	cytosol	TRUE	1	GO:0005829	cytosol	CC	140	61	34	1.8	0.85	6.2e-08	2.7e-06	RpS23, eEF1gamma, UGP, smp-30, RpL36, RpS14a, RpL27A, Paics, RpS10b, Mdh1, RpL34a, RpS27A, RpS25, eEF1alpha1, RpS18, scu, pst, RpLP1, RpS20, Gclm, RpL5, eIF3c, RpL7A, RpS4, Men, RpL6, RpL26, Tudor-SN, RpL11, RpS7, RpL35, RpL18A, RpS8, msk, RpS16, RpS11, RpL27, Gart, RpL36A, RpL32, eEF1beta, RpS3A, RpL13, RpS24, for, l(2)tid, RpLP2, RpL34b, Prx6005, RpL15, Cyp1, Argk, Eno, RpL23, S6k, Hsc70Cb, RpL…
Brain	II	mitochondrion	TRUE	1	GO:0005739	mitochondrion	CC	150	64	38	1.7	0.77	3.8e-07	1.4e-05	CG7470, Sucb, Mtpalpha, CG4598, Cyt-b5-r, Shmt, aralar1, PCB, scu, Hsp60A, GstO2, ND-B14, eIF3c, ND-13B, CG8080, PHGPx, CG7280, yip2, dare, Hsc70-4, mRpS26, ND-B14.5A, ND-SGDH, CG3566, UQCR-14, wal, Scsalpha, CG13551, DCTN2-p50, mRpL44, CG31075, l(2)37Cc, CG7394, Mccc2, ppl, CG7834, P32, TppII, Thiolase, skap, Khc, ND-B22, ND-ACP, Fdx2, ECSIT, mRpL37, ATPsynD, l(2)tid, ND-19, Sirt4, CG6404, bonsa…
Brain	II	cytosolic small ribosomal subunit	TRUE	2	GO:0022627	cytosolic small ribosomal subunit	CC	19	15	4.7	3.2	1.7	8.7e-07	2.9e-05	RpS23, RpS14a, RpS10b, RpS27A, RpS25, RpS18, RpS20, RpS4, RpS7, RpS8, RpS16, RpS11, RpS3A, RpS24, sta	mRpS26, bonsai, mRpS14
Brain	II	ribonucleoprotein complex	TRUE	1	GO:1990904	ribonucleoprotein complex	CC	130	55	32	1.7	0.8	1.4e-06	4e-05	RpS23, RpL36, RpS14a, RpL27A, RpS10b, RpL34a, RpS27A, RpS25, RpS18, RpLP1, RpS20, RpL5, RpL7A, RpS4, RpL6, RpL26, Tudor-SN, RpL11, RpS7, Hsc70-4, mRpS26, Srp14, RpL35, RpL18A, RpS8, RpS16, RpS11, RpL27, mRpL44, Dp1, SNRPG, CG6841, U2af50, RpL36A, Sf3a1, RpL32, Prp31, RpS3A, CG10333, RpL13, RpS24, mRpL37, RpLP2, RpL34b, RpL15, U2A, bonsai, RpL23, mRpL39, mRpL49, RpLP0-like, sta, mRpS14, Hrb87F, Rp…
Brain	II	lipid droplet	TRUE	1	GO:0005811	lipid droplet	CC	110	47	26	1.8	0.84	3.1e-06	8.3e-05	CG7470, Lsd-1, Tps1, pug, Sucb, Mtpalpha, FASN1, alpha-Est7, eEF1gamma, Jabba, CG5958, Cyt-b5-r, CG8839, aralar1, Mdh1, CG7461, vkg, PCB, eEF1alpha1, scu, pst, Hsp60A, Lsd-2, yip2, Tudor-SN, Hsc70-4, ERp60, wal, ACC, Gp93, Dp1, l(2)37Cc, Gtp-bp, CG7834, eEF1beta, Thiolase, CaBP1, ATPsynD, Cyt-b5, apolpp, Eno, COX5A, UQCR-C2, Nup358, alpha-Spec, COX4, Hsc70-3
Brain	II	proteasome accessory complex	TRUE	7	GO:0022624	proteasome accessory complex	CC	13	11	3.2	3.4	1.8	8.8e-06	0.00021	Rpt2, Rpn3, Rpt6R, Rpn12, CG9588, Rpn8, Rpt3, Rpn2, Rpn13, Rpn6, Rpt4	Prosalpha6, CkIalpha, Spase25
Brain	II	small molecule metabolic process	TRUE	1	GO:0044281	small molecule metabolic process	BP	200	76	51	1.5	0.58	1.1e-05	0.00025	CG7470, Sucb, Mtpalpha, Gale, LanA, fbp, CG8665, Shmt, Paics, AlaRS, Mdh1, LManII, PCB, AsnRS, scu, MetRS, CG8891, Tdc2, ND-B14, ND-13B, CG8080, Gip, Men, CG7280, yip2, CG9149, Adi1, dare, P5cr-2, ND-B14.5A, ND-SGDH, Pglym78, UQCR-14, wal, Scsalpha, CG30499, ACC, CG31075, Gart, Hex-C, Sep2, Mccc2, SelD, ppl, GlnRS, CG7834, p38b, alpha-PheRS, Thiolase, skap, ND-B22, ND-ACP, CG33054, Fdx2, ATPsynD,…
Brain	II	energy derivation by oxidation of organic compounds	TRUE	2	GO:0015980	energy derivation by oxidation of organic compounds	BP	39	21	9.6	2.2	1.1	7e-05	0.0014	Pgm, Sucb, FASN1, ND-B14, ND-13B, ND-B14.5A, ND-SGDH, UQCR-14, Scsalpha, ACC, skap, ND-B22, ND-ACP, ND-19, ND-PDSW, COX5A, dj-1beta, UQCR-C2, GlyP, CG5599, COX4	Pglym78, wal, CG7834, Eno
Brain	II	tRNA aminoacylation	TRUE	7	GO:0043039	tRNA aminoacylation	BP	9	8	2.2	3.6	1.8	9.2e-05	0.0017	AlaRS, AsnRS, MetRS, GlnRS, alpha-PheRS, TyrRS, AsnRS-m, mRpL39	IntS4, Rpt4
Brain	II	microtubule associated complex	TRUE	4	GO:0005875	microtubule associated complex	CC	96	40	24	1.7	0.75	0.00011	0.0019	Mtpalpha, eEF1gamma, RpS10b, CG7461, RpS27A, PCB, eEF1alpha1, scu, MetRS, Prosalpha6, Rpt6R, Hsp60A, Lsd-2, yip2, Tudor-SN, Hsc70-4, ERp60, DCTN2-p50, l(2)37Cc, epsilonCOP, Sep2, GlnRS, CG7834, Hsp23, Thiolase, skap, Khc, CG5787, ATPsynD, apolpp, Cyp1, CG10132, Rpn6, Hsp27, eEF1delta, UQCR-C2, Nup358, Rpt4, sta, Hsc70-3	up, cora, ALiX, alpha-Spec
Brain	II	mitochondrial part	TRUE	1	GO:0044429	mitochondrial part	CC	100	41	25	1.6	0.72	0.00018	0.003	CG7470, Sucb, Mtpalpha, aralar1, PCB, Hsp60A, ND-B14, ND-13B, CG7280, dare, Hsc70-4, mRpS26, ND-B14.5A, ND-SGDH, UQCR-14, wal, Scsalpha, mRpL44, CG31075, l(2)37Cc, CG7394, Mccc2, CG7834, P32, Thiolase, ND-B22, Fdx2, mRpL37, ATPsynD, ND-19, CG6404, bonsai, SCOT, mRpL39, ND-PDSW, COX5A, mRpL49, UQCR-C2, CG5599, mRpS14, COX4
Brain	II	ligase activity	TRUE	1	GO:0016874	ligase activity	MF	33	18	8.2	2.2	1.1	0.00019	0.003	pug, Sucb, CG8839, Paics, AlaRS, PCB, AsnRS, MetRS, Scsalpha, ACC, Gart, Mccc2, GlnRS, alpha-PheRS, skap, TyrRS, AsnRS-m, mRpL39
Brain	II	centrosome duplication	TRUE	3	GO:0051298	centrosome duplication	BP	21	13	5.2	2.5	1.3	0.00029	0.0042	RpS23, RpL27A, RpL7A, RpS4, RpL6, RpL11, RpL35, RpL18A, RpL27, skap, RpL13, Rcd1, Hsc70-3	Khc
Brain	II	mitochondrial matrix	TRUE	1	GO:0005759	mitochondrial matrix	CC	45	22	11	2	0.98	0.00031	0.0042	Sucb, Mtpalpha, PCB, Hsp60A, dare, mRpS26, wal, Scsalpha, mRpL44, CG31075, Mccc2, CG7834, P32, Thiolase, Fdx2, mRpL37, bonsai, SCOT, mRpL39, mRpL49, CG5599, mRpS14
Brain	II	organic substance catabolic process	TRUE	2	GO:1901575	organic substance catabolic process	BP	89	36	22	1.6	0.71	0.00051	0.0067	Lsd-1, Mtpalpha, fbp, CG8665, Idgf6, Rpt2, Rpn3, Idgf3, Prosalpha6, Rpt6R, Rpn12, CG8891, Lsd-2, CG7280, yip2, CG9149, dare, Pglym78, Rpn8, Rpt3, PNPase, Mccc2, Rpn2, ppl, Vps20, Thiolase, Rpn13, ALiX, SCOT, Rpn6, Eno, CkIalpha, Rpt4, Usp47, GlyP, Usp7	Prx6005
Brain	II	ATP synthesis coupled electron transport	TRUE	5	GO:0042773	ATP synthesis coupled electron transport	BP	22	13	5.4	2.4	1.3	0.00056	0.007	ND-B14, ND-13B, ND-B14.5A, ND-SGDH, UQCR-14, ND-B22, ND-ACP, ND-19, ND-PDSW, COX5A, dj-1beta, UQCR-C2, COX4	wal, CG7834
Brain	II	carboxylic acid metabolic process	TRUE	3	GO:0019752	carboxylic acid metabolic process	BP	72	30	18	1.7	0.75	0.00085	0.01	CG7470, Mtpalpha, Shmt, AlaRS, Mdh1, PCB, AsnRS, scu, MetRS, Tdc2, Gip, Men, yip2, CG9149, Adi1, P5cr-2, Pglym78, ACC, CG31075, Mccc2, SelD, ppl, GlnRS, alpha-PheRS, Thiolase, ND-ACP, TyrRS, Eno, AsnRS-m, mRpL39	Sucb, CG7280, Scsalpha, skap, CG5599
Brain	II	mitochondrial protein complex	TRUE	1	GO:0098798	mitochondrial protein complex	CC	42	20	10	1.9	0.95	0.00089	0.01	Sucb, Mtpalpha, ND-B14, ND-13B, ND-B14.5A, ND-SGDH, UQCR-14, wal, Scsalpha, CG7394, CG7834, Thiolase, ND-B22, ATPsynD, ND-19, ND-PDSW, COX5A, UQCR-C2, CG5599, COX4
Brain	II	cellular protein catabolic process	TRUE	8	GO:0044257	cellular protein catabolic process	BP	32	16	7.9	2	1	0.0016	0.017	Rpt2, Rpn3, Prosalpha6, Rpt6R, Rpn12, Rpn8, Rpt3, Rpn2, Vps20, Rpn13, ALiX, Rpn6, CkIalpha, Rpt4, Usp47, Usp7	Idgf6, Idgf3, CG7280, PNPase, GlyP
Brain	II	oxidation-reduction process	TRUE	1	GO:0055114	oxidation-reduction process	BP	120	43	29	1.5	0.57	0.0016	0.017	CG7470, pug, Pgm, Sucb, Mtpalpha, FASN1, CG8665, Mdh1, CG7461, LKRSDH, Sptr, Cat, ND-B14, ND-13B, PHGPx, Men, CG7280, CG5321, yip2, CG9149, Adi1, dare, P5cr-2, ND-B14.5A, ND-SGDH, UQCR-14, Scsalpha, ACC, CG31075, CG18547, Thiolase, skap, ND-B22, ND-ACP, ND-19, Prx6005, ND-PDSW, COX5A, dj-1beta, UQCR-C2, GlyP, CG5599, COX4
Brain	II	cellular respiration	TRUE	1	GO:0045333	cellular respiration	BP	35	17	8.7	2	0.97	0.0017	0.017	Sucb, ND-B14, ND-13B, ND-B14.5A, ND-SGDH, UQCR-14, Scsalpha, skap, ND-B22, ND-ACP, ND-19, ND-PDSW, COX5A, dj-1beta, UQCR-C2, CG5599, COX4
Brain	II	ATP binding	TRUE	3	GO:0005524	ATP binding	MF	95	36	23	1.5	0.62	0.0021	0.021	pug, Sucb, Paics, AlaRS, Rpt2, PCB, AsnRS, MetRS, Rpt6R, Hsp60A, CG6418, ACC, Gp93, Gart, Rpt3, Hex-C, c12.2, SelD, GlnRS, p38b, alpha-PheRS, skap, Khc, CG10333, CG31729, for, l(2)tid, TyrRS, Dak1, AsnRS-m, trc, CkIalpha, S6k, Rpt4, CG10226, Nak
Brain	II	oxidoreductase activity	TRUE	1	GO:0016491	oxidoreductase activity	MF	120	43	30	1.5	0.54	0.0029	0.027	CG7470, pug, Gmer, Mtpalpha, FASN1, CG3597, CG7322, Cyt-b5-r, CG8665, Mdh1, CG7461, LKRSDH, Sptr, GstO3, scu, GstO2, Cat, ND-B14, ND-13B, PHGPx, Men, CG7280, CG5321, CG4716, Adi1, Sc2, dare, P5cr-2, Dhpr, ND-B14.5A, ND-SGDH, UQCR-14, CG31075, CG18547, Thiolase, ND-B22, ECSIT, ND-19, Prx6005, ND-PDSW, COX5A, UQCR-C2, COX4
Brain	II	cellular catabolic process	TRUE	1	GO:0044248	cellular catabolic process	BP	74	29	18	1.6	0.66	0.0033	0.029	Lsd-1, Mtpalpha, CG8665, Rpt2, Rpn3, Prosalpha6, Rpt6R, Rpn12, CG8891, yip2, CG9149, Rpn8, Rpt3, PNPase, Mccc2, Rpn2, ppl, Vps20, Thiolase, Rpn13, ALiX, Prx6005, SCOT, Rpn6, CkIalpha, Rpt4, Usp47, GlyP, Usp7
Brain	II	isomerase activity	TRUE	1	GO:0016853	isomerase activity	MF	20	11	5	2.2	1.2	0.0034	0.029	Pgm, Gale, CG4598, Gip, FK506-bp2, ERp60, Pglym78, CG30499, CaBP1, Pmm2, Cyp1
Brain	II	oxidoreductase activity, acting on the CH-NH group of donors, NAD or NADP as acceptor	TRUE	2	GO:0016646	oxidoreductase activity, acting on the CH-NH group of donors, NAD or NADP as acceptor	MF	8	6	2	3	1.6	0.0039	0.033	pug, CG8665, LKRSDH, CG4716, P5cr-2, Dhpr
Brain	II	proteasome regulatory particle, base subcomplex	TRUE	1	GO:0008540	proteasome regulatory particle, base subcomplex	CC	6	5	1.5	3.4	1.8	0.0043	0.035	Rpt2, Rpt6R, Rpt3, Rpn2, Rpt4
Brain	II	proteasome regulatory particle, lid subcomplex	TRUE	1	GO:0008541	proteasome regulatory particle, lid subcomplex	CC	6	5	1.5	3.4	1.8	0.0043	0.035	Rpn3, Rpn12, Rpn8, Rpn13, Rpn6
Brain	II	electron transfer activity	TRUE	1	GO:0009055	electron transfer activity	MF	18	10	4.4	2.3	1.2	0.0047	0.036	Cyt-b5-r, dare, CG3566, wal, CG7834, Fdx2, Cyt-b5, Fdx1, COX5A, COX4
Brain	II	carbohydrate derivative metabolic process	TRUE	1	GO:1901135	carbohydrate derivative metabolic process	BP	86	32	21	1.5	0.59	0.0053	0.04	Gmer, UGP, Idgf6, Paics, Idgf3, CG14645, ND-B14, ND-13B, ND-B14.5A, ND-SGDH, Pglym78, UQCR-14, wal, CG30499, Gart, CG7834, ND-B22, ND-ACP, CG33054, ATPsynD, ND-19, Pmm2, Eno, ND-PDSW, COX5A, dj-1beta, UQCR-C2, CG12065, AdSL, Alg1, CG16758, COX4
Brain	II	respiratory chain	TRUE	5	GO:0070469	respiratory chain	CC	21	11	5.2	2.1	1.1	0.0055	0.04	ND-B14, ND-13B, ND-B14.5A, ND-SGDH, UQCR-14, ND-B22, ND-19, ND-PDSW, COX5A, UQCR-C2, COX4	CG7394, ATPsynD
Brain	II	proteolysis	TRUE	1	GO:0006508	proteolysis	BP	64	25	16	1.6	0.66	0.0066	0.047	CG12163, Rpt2, Rpn3, Spn42Dd, Prosalpha6, Rpt6R, Rpn12, CG5355, CG9588, Rpn8, Rpt3, Rpn2, TppII, Vps20, skap, und, Rpn13, ALiX, Rpn6, CkIalpha, Rpt4, Usp47, Usp7, SP1029, Spase25
Brain	II	cellular amino acid metabolic process	TRUE	1	GO:0006520	cellular amino acid metabolic process	BP	36	16	8.9	1.8	0.85	0.0069	0.048	CG7470, Shmt, AlaRS, AsnRS, MetRS, Tdc2, Adi1, P5cr-2, Mccc2, SelD, ppl, GlnRS, alpha-PheRS, TyrRS, AsnRS-m, mRpL39
Brain	III	germ cell migration	TRUE	1	GO:0008354	germ cell migration	BP	5	5	1.1	4.5	2.2	0.0005	0.019	shg, Mulk, Fpps, Invadolysin, Rho1
Brain	III	inaD signaling complex	TRUE	2	GO:0016027	inaD signaling complex	CC	7	6	1.5	3.9	2	0.00062	0.019	ninaC, inaC, inaD, norpA, ninaE, trp	Arr2, boss, fusl
Brain	III	eye pigment biosynthetic process	TRUE	9	GO:0006726	eye pigment biosynthetic process	BP	8	6	1.8	3.4	1.8	0.002	0.038	rdhB, ninaA, Rab32, se, Hn, dor	Pu, trp, e, Rho1, FeCH, t, mgl
Brain	III	methyltransferase activity	TRUE	2	GO:0008168	methyltransferase activity	MF	8	6	1.8	3.4	1.8	0.002	0.038	CG13126, CG9249, CG9643, CG4045, CG3793, Sbf
Brain	III	extrinsic component of plasma membrane	TRUE	3	GO:0019897	extrinsic component of plasma membrane	CC	17	11	3.7	2.9	1.6	0.00017	0.01	ninaC, Gbeta76C, inaC, inaD, shg, Galphai, norpA, ninaE, trp, mbc, Gbeta5	Mdr65, CG3397, nrv2, Chc
Brain	III	endopeptidase activity	TRUE	1	GO:0004175	endopeptidase activity	MF	16	10	3.5	2.8	1.5	0.00052	0.019	goe, UQCR-C1, Prosalpha5, CG40160, CG1440, Prosalpha1, Invadolysin, cathD, CG7791, CG31205
Brain	III	oxidoreductase activity, acting on CH-OH group of donors	TRUE	1	GO:0016614	oxidoreductase activity, acting on CH-OH group of donors	MF	35	18	7.7	2.3	1.2	0.0001	0.0084	rdhB, CG9436, CG9150, CG6084, Pdh, CG7675, CG10863, CG15093, CG18003, Sodh-1, CG9360, Ldh, Fdh, Gpdh1, AOX3, Gpo1, CG8757, antdh
Brain	III	structural constituent of chitin-based larval cuticle	TRUE	4	GO:0008010	structural constituent of chitin-based larval cuticle	MF	30	15	6.6	2.3	1.2	0.0006	0.019	Cpr62Bb, Cpr66D, Cpr72Ec, Cpr47Ee, Cpr49Ag, Cpr51A, CG15515, Cpr65Au, resilin, Cpr47Ef, Cpr67B, Lcp65Ac, Cpr50Cb, Ccp84Ag, Cpr47Ea	Crys, Ndg, prc, Tig
Brain	III	chitin-based cuticle development	TRUE	2	GO:0040003	chitin-based cuticle development	BP	41	18	9	2	1	0.0012	0.03	Cpr62Bb, Cpr66D, Pu, Cpr72Ec, Cpr47Ee, Cpr49Ag, Sec13, Cpr51A, CG15515, Cpr65Au, mgl, resilin, Cpr47Ef, Cpr67B, Lcp65Ac, Cpr50Cb, Ccp84Ag, Cpr47Ea	t, e
Brain	III	response to light stimulus	TRUE	2	GO:0009416	response to light stimulus	BP	36	16	7.9	2	1	0.002	0.038	ninaC, Gbeta76C, inaC, Arr1, Arr2, inaD, ogre, ninaA, Fdh, Ttc19, norpA, ninaE, Pdf, trp, Vha100-1, TotA
Brain	III	oxidoreductase activity	TRUE	1	GO:0016491	oxidoreductase activity	MF	120	50	26	1.9	0.92	2.8e-07	6.9e-05	rdhB, CG3270, CG9436, Cyp6g2, CG3397, Cpr, CG14997, CG9150, CG6084, Pdh, CG7675, CG10863, CG15093, Aldh-III, CG18003, Sodh-1, UQCR-C1, ND-51, CG12338, CG14688, CG9471, CG9360, Ldh, Fdh, Trxr-1, CG9547, Cyp9f2, CG7601, se, Gpdh1, Cyp6w1, ND-13A, CG2604, L2HGDH, Hn, Ssadh, CG4199, AOX3, Gpo1, P5cr, Dhfr, ND-30, CG3626, nero, CG10211, ND-B18, CG8757, antdh, Eip71CD, CG7484
Brain	III	oxidation-reduction process	TRUE	1	GO:0055114	oxidation-reduction process	BP	120	44	26	1.7	0.77	4.2e-05	0.0051	CG3270, CG9436, Cyp6g2, CG3397, Cpr, CG14997, CG6084, Pdh, nahoda, CG10863, CG15093, Aldh-III, CG18003, Sodh-1, UQCR-C1, ND-51, CG11208, CG12338, CG14688, Ldh, Fdh, Trxr-1, CG9547, Cyp9f2, Gpdh1, Cyp6w1, ND-13A, CG2604, L2HGDH, Hn, Ssadh, CPT2, CG4199, AOX3, Gpo1, P5cr, Invadolysin, Dhfr, ND-30, CG3626, CG10211, ND-B18, antdh, Eip71CD
Brain	III	extracellular region part	TRUE	1	GO:0044421	extracellular region part	CC	92	33	20	1.6	0.7	0.0012	0.03	Ilp3, Ilp5, Cpr62Bb, CG6218, Crys, Cpr66D, Cpr72Ec, CG5945, Ndg, ImpL2, Cpr47Ee, prc, Cpr49Ag, Tig, Cpr51A, retinin, Tep4, ltl, Hexo2, nec, CG15515, Akh, Cpr65Au, resilin, Cpr47Ef, Cpr67B, Lcp65Ac, Cpr50Cb, Pdf, CG15117, Ccp84Ag, TotA, Cpr47Ea
Brain	IV	structural constituent of chitin-based larval cuticle	TRUE	6	GO:0008010	structural constituent of chitin-based larval cuticle	MF	30	13	4.1	3.2	1.7	5.9e-05	0.011	Cpr64Ac, Cpr100A, CG34461, Cpr97Eb, Cpr30F, Cpr76Bd, Cpr62Bc, Cpr92F, Cpr64Aa, Acp65Aa, Cpr73D, Cpr49Aa, Cpr49Ab	sgg, Glut1, Ddc, Acp1
Thorax	I	phospholipid binding	TRUE	3	GO:0005543	phospholipid binding	MF	5	5	1	5	2.3	0.00028	0.0078	AnxB9, kst, AnxB10, Snx3, EndoB	capt, Patj, Cp190
Thorax	IV	mesoderm development	TRUE	1	GO:0007498	mesoderm development	BP	6	6	1.8	3.2	1.7	0.00077	0.008	CG43897, Prm, up, Zasp66, bt, how
Thorax	IV	negative regulation of signaling	TRUE	9	GO:0023057	negative regulation of signaling	BP	5	5	1.5	3.2	1.7	0.0026	0.017	Lpin, Eps-15, Spn88Ea, lwr, Pka-C1	Nup98-96, par-1, dnc, smt3, asrij, Cbp53E
Thorax	III	cytosolic large ribosomal subunit	TRUE	13	GO:0022625	cytosolic large ribosomal subunit	CC	10	8	2.8	2.8	1.5	0.00089	0.014	RpL5, RpL32, RpL23, RpL35, RpL7A, RpL13A, RpL26, RpL28	RpS23, RpS14a, eEF5, Syp, eIF4B, CCT4
Thorax	IV	NADH dehydrogenase activity	TRUE	31	GO:0003954	NADH dehydrogenase activity	MF	7	6	2.2	2.8	1.5	0.004	0.023	ND-B16.6, ND-B17, ND-B15, ND-ASHI, ND-13B, ND-19	Cyt-c1, Tspo, UQCR-14, Pglym78, SdhA, ND-MWFE
Thorax	IV	organelle inner membrane	TRUE	8	GO:0019866	organelle inner membrane	CC	22	16	6.8	2.4	1.2	3.2e-05	0.0017	Cyt-c1, CG5903, ND-B16.6, SdhA, ND-B17, CG11779, ND-B15, YME1L, CG7772, ND-ASHI, CG30493, ND-13B, CG6404, ND-19, UQCR-14, ND-MWFE	CG7280, Tspo, CG8086, Nup98-96, Gdh, l(1)G0156, mRpL12
Thorax	IV	mitochondrial membrane part	TRUE	4	GO:0044455	mitochondrial membrane part	CC	17	12	5.2	2.3	1.2	0.00061	0.0079	Cyt-c1, CG5903, ND-B16.6, SdhA, ND-B17, CG11779, ND-B15, ND-ASHI, ND-13B, ND-19, UQCR-14, ND-MWFE	Ca-alpha1D, Flo1
Thorax	IV	respiratory chain	TRUE	5	GO:0070469	respiratory chain	CC	14	10	4.3	2.3	1.2	0.0017	0.012	Cyt-c1, ND-B16.6, SdhA, ND-B17, ND-B15, ND-ASHI, ND-13B, ND-19, UQCR-14, ND-MWFE	Pdha, Pka-R1, Pka-C1
Thorax	III	ribonucleoprotein complex	TRUE	1	GO:1990904	ribonucleoprotein complex	CC	23	14	6.6	2.1	1.1	0.00074	0.014	bel, RpL5, RpS23, RpS14a, RpL32, RpL23, Tudor-SN, RpL35, RpL7A, Syp, RpL13A, RpL26, Fib, RpL28
Thorax	IV	cellular respiration	TRUE	3	GO:0045333	cellular respiration	BP	18	12	5.6	2.2	1.1	0.0013	0.012	Cyt-c1, Gdh, ND-B16.6, SdhA, l(1)G0156, ND-B17, ND-B15, ND-ASHI, ND-13B, ND-19, smt3, UQCR-14	Pglym78, Tspo
Thorax	IV	phosphorylation	TRUE	3	GO:0016310	phosphorylation	BP	28	17	8.6	2	0.98	0.00057	0.0079	Cyt-c1, ND-B16.6, ND-B17, Pglym78, ND-B15, bt, ND-ASHI, Pka-R1, ND-13B, par-1, Tspo, Pka-C1, ND-19, Argk, smt3, UQCR-14, CG7789	Gdh, dnc
Thorax	IV	mitochondrion	TRUE	1	GO:0005739	mitochondrion	CC	51	27	16	1.7	0.78	0.00025	0.0064	Cyt-c1, Gdh, CG5903, ND-B16.6, SdhA, l(1)G0156, CG10924, ND-B17, CG6512, mRpL12, CG11779, ND-B15, COQ7, CG2658, YME1L, CG7772, CG7280, Pdha, ND-ASHI, Men-b, CG30493, ND-13B, CG6404, Tspo, ND-19, UQCR-14, ND-MWFE

## Sheet: Quadrants GO enrichment, transc
Tissue	Quadrant	Primary	Is.primary	Terms.in.cluster	GO.ID	Term	Ontology	Annotated	Significant	Expected	Enrichment	log2Enrichment	Fisher	Primary.Fisher.adj	Genes	Genes.in.secondary
Fat	III	glucosidase activity	TRUE	3	GO:0015926	glucosidase activity	MF	5	5	1	5	2.3	0.0003	0.0028	Mal-A8, Mal-A1, Mal-A2, Mal-A7, tobi
Fat	III	hydrolase activity, hydrolyzing O-glycosyl compounds	TRUE	3	GO:0004553	hydrolase activity, hydrolyzing O-glycosyl compounds	MF	14	9	2.8	3.2	1.7	0.00031	0.0028	Mal-A8, Mal-A1, Mal-A2, Mal-A7, tobi, Amy-d, Ect3, Gal, Cht2	Mal-A6, Adgf-A
Fat	III	serine-type endopeptidase activity	TRUE	7	GO:0004252	serine-type endopeptidase activity	MF	14	8	2.8	2.8	1.5	0.0021	0.013	Jon65Aiii, Jon65Aiv, yip7, Ser6, alphaTry, Jon74E, betaTry, Jon99Cii	CG12374, CG31233, CG4408, CG8773, faf
Fat	III	plasma membrane part	TRUE	2	GO:0044459	plasma membrane part	CC	7	5	1.4	3.5	1.8	0.0045	0.02	CG4562, CAH2, CG33970, sdk, CG3397	MRP, Ih, Crag
Fat	III	response to nutrient levels	TRUE	2	GO:0031667	response to nutrient levels	BP	8	5	1.6	3.1	1.6	0.01	0.029	Adgf-A, Ih, l(2)05287, CG9799, l(2)k09022
Fat	III	ATPase activity, coupled	TRUE	18	GO:0042623	ATPase activity, coupled	MF	8	5	1.6	3.1	1.6	0.01	0.029	CG4562, Vha100-5, Myo61F, MRP, CG33970	CG10914, r, LeuRS-m, CG42249
Fat	III	transmembrane transport	TRUE	4	GO:0055085	transmembrane transport	BP	11	6	2.2	2.7	1.4	0.011	0.029	CG4562, Vha100-5, Picot, MRP, Ih, CG7458	CG2930, CG33970
Gut	I	carbohydrate metabolic process	TRUE	1	GO:0005975	carbohydrate metabolic process	BP	32	21	12	1.7	0.78	0.00067	0.011	LManIII, LManV, LManVI, Mal-A6, LManIV, Mal-A7, Hexo2, Mal-A3, Galk, Mal-A1, Amy-p, tobi, Men-b, Idh, Ect3, Gal, CG10467, Pgm, CG7997, Eno, GlyS
Gut	I	hexose metabolic process	TRUE	2	GO:0019318	hexose metabolic process	BP	15	12	5.8	2.1	1.1	0.00084	0.011	LManIII, LManV, LManVI, LManIV, Mal-A3, Galk, Mal-A1, Men-b, Gal, CG10467, Eno, GlyS
Gut	I	hydrolase activity, acting on glycosyl bonds	TRUE	2	GO:0016798	hydrolase activity, acting on glycosyl bonds	MF	18	13	6.9	1.9	0.91	0.0025	0.022	LManIII, LManV, LManVI, LManIV, Mal-A7, Hexo2, Mal-A3, Mal-A1, Amy-p, tobi, Ect3, Gal, CG7997
Gut	II	peptidase activity	TRUE	3	GO:0008233	peptidase activity	MF	14	5	1.5	3.3	1.7	0.0096	0.0096	CG17571, yip7, etaTry, CG5246, CG12374
Gut	IV	translation	TRUE	6	GO:0006412	translation	BP	15	6	1.8	3.4	1.8	0.0034	0.014	Rack1, RpS13, RpL3, eIF3e, RpL23A, CG7414	GstD2, Prx2540-2
Brain	I	RNA binding	TRUE	1	GO:0003723	RNA binding	MF	8	5	1.4	3.5	1.8	0.0048	0.0095	scaf6, Ref1, CG6745, nonA-l, x16
Brain	I	cellular component assembly	TRUE	1	GO:0022607	cellular component assembly	BP	9	5	1.6	3.1	1.6	0.0095	0.0095	btsz, Cep97, Nos, Atg18a, x16
Thorax	I	cell adhesion molecule binding	TRUE	10	GO:0050839	cell adhesion molecule binding	MF	5	5	1.2	4.1	2	0.00086	0.032	rhea, Fas1, Fit1, mys, if	Mhc, kst, capt, Fas2, CAP, Nrg
Thorax	II	proteasome complex	TRUE	13	GO:0000502	proteasome complex	CC	12	8	2.2	3.7	1.9	0.00022	0.012	Prosalpha6, Prosalpha1, Prosalpha7, Rpt6, Prosbeta6, Prosbeta2, Prosbeta3, Rpn11	Usp14, DNaseII, Idgf3
Thorax	II	proteasome core complex	TRUE	4	GO:0005839	proteasome core complex	CC	9	6	1.6	3.7	1.9	0.0015	0.043	Prosalpha6, Prosalpha1, Prosalpha7, Prosbeta6, Prosbeta2, Prosbeta3	CG14526, CG31205
Thorax	I	muscle attachment	TRUE	3	GO:0016203	muscle attachment	BP	8	7	2	3.6	1.8	0.00031	0.032	rhea, Dg, shot, CAP, mys, if, betaTub56D	Act57B, Mhc, LamC
Thorax	I	aromatic amino acid family metabolic process	TRUE	1	GO:0009072	aromatic amino acid family metabolic process	BP	7	6	1.7	3.5	1.8	0.0012	0.032	hgo, Faa, GstZ2, Ddc, CG11796, CG1461
Thorax	III	cytosolic large ribosomal subunit	TRUE	2	GO:0022625	cytosolic large ribosomal subunit	CC	23	22	6.6	3.4	1.8	6.8e-12	3.5e-10	RpL10, RpL5, RpLP1, RpL32, RpL24, RpL23, RpL15, RpL38, RpL35, RpL14, RpL18, RpL11, RpL8, RpL27A, RpL9, RpL36A, RpLP2, RpL10Ab, RpL36, RpL29, RpL30, RpL7
Thorax	III	odorant binding	TRUE	2	GO:0005549	odorant binding	MF	6	6	1.7	3.5	1.8	0.00051	0.0048	Obp56a, Obp56d, Obp44a, Obp99c, Obp99a, Obp56e	Mvl
Thorax	IV	striated muscle thin filament	TRUE	3	GO:0005865	striated muscle thin filament	CC	5	5	1.4	3.5	1.8	0.002	0.016	up, wupA, sals, Tm1, Tm2	Unc-89, Actn, Prm
Thorax	I	endomembrane system organization	TRUE	2	GO:0010256	endomembrane system organization	BP	9	7	2.2	3.2	1.7	0.0011	0.032	LamC, kst, beta-Spec, Lam, comt, EndoA, Osbp	nSyb, cora, Opa1
Thorax	III	cytoplasmic translation	TRUE	6	GO:0002181	cytoplasmic translation	BP	43	37	12	3	1.6	4.8e-16	5e-14	RpS29, RpL10, RpL5, RpS23, RpS9, RpLP1, RpS14a, RpL32, RpL24, RpL23, RpL15, RpL38, RpL35, RpL14, RpS16, RpL18, RpS27A, RpL11, RpS8, RpS28b, RpL8, RpL27A, RpL9, RpS27, RpS15, RpL36A, RpLP2, RpS30, RpL10Ab, RpS20, RpS21, RpL36, RpS5a, RpS3A, RpL29, RpL30, RpL7
Thorax	III	centrosome duplication	TRUE	6	GO:0051298	centrosome duplication	BP	14	12	4	3	1.6	1.1e-05	0.00013	RpL10, RpS23, RpL24, RpL35, RpL14, RpL11, RpL8, RpL27A, RpL9, RpL10Ab, RpL30, RpL7	ssp7, l(2)gl, Gel
Thorax	IV	tricarboxylic acid cycle	TRUE	2	GO:0006099	tricarboxylic acid cycle	BP	15	13	4.4	3	1.6	4.3e-06	8.1e-05	SdhA, Mdh2, l(1)G0156, Nc73EF, CG7430, kdn, Idh3b, Scsalpha, SdhB, Acon, SdhD, l(1)G0255, CG5028	Gdh
Thorax	IV	mesoderm development	TRUE	1	GO:0007498	mesoderm development	BP	7	6	2	2.9	1.6	0.003	0.019	CG43897, Prm, up, Zasp66, CG34417, dl
Thorax	III	extracellular matrix	TRUE	3	GO:0031012	extracellular matrix	CC	10	8	2.8	2.8	1.5	0.001	0.0087	Cpr65Au, Cpr60D, Cpr47Ef, Col4a1, Ndg, l(2)gl, Ppn, Cpr73D	Idgf4, Mkk4
Thorax	IV	intracellular mRNA localization	TRUE	22	GO:0008298	intracellular mRNA localization	BP	6	5	1.7	2.9	1.5	0.009	0.045	Tm1, Khc, Dhc64C, Rop, Syt1	dl, Lpin, ND-B12, DCTN1-p150, alpha-Spec, futsch
Thorax	III	nucleolus	TRUE	4	GO:0005730	nucleolus	CC	9	7	2.6	2.7	1.4	0.0029	0.022	RpS9, RpL32, RpL11, RpL8, RpS15, RpL36, RpS5a	Papss, Cyp1
Thorax	III	peptidase inhibitor activity	TRUE	7	GO:0030414	peptidase inhibitor activity	MF	9	7	2.6	2.7	1.4	0.0029	0.022	Tep2, IM33, cer, Cys, CG31313, Ppn, Tep4	l(2)gl, Cyp1, PlexA
Thorax	IV	proton-transporting ATP synthase complex	TRUE	10	GO:0045259	proton-transporting ATP synthase complex	CC	8	6	2.3	2.6	1.4	0.009	0.045	ATPsyngamma, ATPsynCF6, ATPsynF, blw, CG10731, ATPsynD	AdSS, VhaAC45, Vha36-3
Thorax	IV	cation channel activity	TRUE	8	GO:0005261	cation channel activity	MF	8	6	2.3	2.6	1.4	0.009	0.045	brp, RyR, Ca-alpha1D, Shal, CG4239, CG4587	SERCA, Nckx30C, CG7708
Thorax	III	cytosolic small ribosomal subunit	TRUE	2	GO:0022627	cytosolic small ribosomal subunit	CC	21	15	6	2.5	1.3	4.2e-05	0.00043	RpS29, RpS23, RpS9, RpS14a, RpS16, RpS27A, RpS8, RpS28b, RpS27, RpS15, RpS30, RpS20, RpS21, RpS5a, RpS3A
Thorax	III	extracellular region part	TRUE	1	GO:0044421	extracellular region part	CC	41	27	12	2.3	1.2	3e-07	5.2e-06	Listericin, Cpr65Au, CG5867, Cpr60D, Cpr47Ef, Ggt-1, Col4a1, Tep2, Ndg, CG5791, regucalcin, ssp7, l(2)gl, shv, CG5945, FMRFa, cv-d, Cys, NLaz, Spn43Ab, Ppn, Cpr73D, Tep4, Obp56e, CG2852, Nplp2, Pdi
Thorax	III	extracellular space	TRUE	1	GO:0005615	extracellular space	CC	28	19	8	2.4	1.2	1.1e-05	0.00013	Listericin, CG5867, Ggt-1, Tep2, CG5791, regucalcin, ssp7, shv, CG5945, FMRFa, cv-d, Cys, NLaz, Spn43Ab, Tep4, Obp56e, CG2852, Nplp2, Pdi
Thorax	IV	generation of precursor metabolites and energy	TRUE	1	GO:0006091	generation of precursor metabolites and energy	BP	55	37	16	2.3	1.2	7.4e-10	5.6e-08	Cyt-c1, Gdh, ND-B16.6, GlyS, SdhA, Mdh2, ND-75, l(1)G0156, COX5A, CG7766, ND-B17, Nc73EF, ND-20, Cyt-c-p, ND-B12, Gpo1, CG7430, ND-PDSW, Pglym78, kdn, ND-18, Idh3b, ND-B15, GlyP, Scsalpha, ND-42, Eno, blw, SdhB, Acon, SdhD, Gapdh1, CG32649, Rim2, l(1)G0255, CG5028, Pgi
Thorax	IV	mitochondrial inner membrane	TRUE	6	GO:0005743	mitochondrial inner membrane	CC	47	31	14	2.3	1.2	4.9e-08	2.4e-06	Cyt-c1, CG5903, ND-B16.6, SdhA, Mitofilin, ND-75, ATPsyngamma, COX5A, ND-B17, ND-20, Cyt-c-p, ND-B12, Gpo1, ND-PDSW, ND-18, CG11779, ATPsynCF6, ND-B15, ND-42, ATPsynF, blw, YME1L, CG7772, Ucp4A, CG10731, SdhB, ATPsynD, SdhD, COX6B, ND-B14.7, CG11752	Rim2, koi, SERCA, CG8086, Fas3
Thorax	IV	cellular respiration	TRUE	2	GO:0045333	cellular respiration	BP	40	27	12	2.3	1.2	2e-07	6e-06	Cyt-c1, Gdh, ND-B16.6, SdhA, Mdh2, ND-75, l(1)G0156, COX5A, ND-B17, Nc73EF, ND-20, ND-B12, Gpo1, CG7430, ND-PDSW, kdn, Idh3b, ND-B15, Scsalpha, ND-42, SdhB, Acon, SdhD, CG32649, Rim2, l(1)G0255, CG5028	GlyS, CG7766, GlyP
Thorax	IV	inner mitochondrial membrane protein complex	TRUE	3	GO:0098800	inner mitochondrial membrane protein complex	CC	38	25	11	2.3	1.2	1.3e-06	2.8e-05	Cyt-c1, CG5903, ND-B16.6, SdhA, ND-75, ATPsyngamma, COX5A, ND-B17, ND-20, ND-B12, ND-PDSW, ND-18, CG11779, ATPsynCF6, ND-B15, ND-42, ATPsynF, blw, CG10731, SdhB, ATPsynD, SdhD, COX6B, ND-B14.7, CG11752	Nc73EF, CG7430, Scsalpha
Thorax	IV	sarcomere	TRUE	4	GO:0030017	sarcomere	CC	22	15	6.4	2.3	1.2	0.00012	0.002	Prm, up, Zasp52, Mlp60A, zormin, Zasp66, wupA, Unc-89, tn, Pglym78, sals, Tm1, Tm2, Actn, Gapdh1	Mlc2, Mp20
Thorax	I	imaginal disc morphogenesis	TRUE	7	GO:0007560	imaginal disc morphogenesis	BP	26	14	6.4	2.2	1.1	0.001	0.032	cmb, rhea, Pcyt1, Dg, CG43427, shot, cora, mys, Nrg, chic, tmod, if, Fas2, trc	Patj, Lam, jbug, LamC
Thorax	III	ribonucleoprotein complex	TRUE	1	GO:1990904	ribonucleoprotein complex	CC	69	43	20	2.2	1.1	5.1e-10	1.8e-08	RpS29, RpL10, bel, RpL5, RpS23, RpS9, RpLP1, RpS14a, RpL32, RpL24, RpL23, RpL15, RpL38, SsRbeta, Tudor-SN, RpL35, RpL14, RpS16, RpL18, RpS27A, RpL11, RpS8, pAbp, RpS28b, RpL8, RpL27A, RpL9, RpS27, RpS15, RpL36A, RpLP2, RpS30, RpL10Ab, RpS20, RpS21, RpL36, RpS5a, RpS3A, RpL29, RpL30, Srp9, RpL7, me31B
Thorax	III	translation	TRUE	5	GO:0006412	translation	BP	72	44	21	2.1	1.1	7.8e-10	2e-08	eEF5, RpS29, RpL10, RpL5, RpS23, RpS9, RpLP1, RpS14a, RpL32, RpL24, RpL23, RpL15, RpL38, RpL35, LeuRS, RpL14, RpS16, RpL18, RpS27A, RpL11, RpS8, pAbp, RpS28b, RpL8, RpL27A, RpL9, eIF4G1, RpS27, RpS15, eEF1alpha1, RpL36A, RpLP2, RpS30, RpL10Ab, RpS20, RpS21, RpL36, RpS5a, RpS3A, RpL29, RpL30, Srp9, RpL7, me31B	Ggt-1, Spase25
Thorax	IV	muscle cell differentiation	TRUE	3	GO:0042692	muscle cell differentiation	BP	28	17	8.1	2.1	1.1	0.00035	0.004	Prm, Zasp67, up, Zasp52, Zasp66, wupA, Unc-89, tn, Mlc2, Pglym78, sals, Tm2, Khc, Mp20, Pax, Actn, Gapdh1	Mlp60A, parvin
Thorax	IV	respiratory chain	TRUE	3	GO:0070469	respiratory chain	CC	28	17	8.1	2.1	1.1	0.00035	0.004	Cyt-c1, ND-B16.6, SdhA, ND-75, COX5A, ND-B17, ND-20, ND-B12, ND-PDSW, ND-18, ND-B15, ND-42, SdhB, SdhD, COX6B, ND-B14.7, CG11752
Thorax	IV	monovalent inorganic cation transport	TRUE	3	GO:0015672	monovalent inorganic cation transport	BP	19	12	5.5	2.2	1.1	0.0017	0.015	ATPsyngamma, Nckx30C, ATPsynCF6, VhaAC45, ATPsynF, blw, Ucp4A, CG10731, Vha36-3, Shal, ATPsynD, CG4239	SERCA, RyR, Ca-alpha1D, Rh50, CG9297
Thorax	IV	myofibril assembly	TRUE	6	GO:0030239	myofibril assembly	BP	19	12	5.5	2.2	1.1	0.0017	0.015	Prm, Zasp67, up, Zasp52, Zasp66, wupA, Unc-89, tn, Mlc2, sals, Tm2, Actn	Khc, Pax, CG5023, Non2, DCTN1-p150
Thorax	IV	mitochondrion	TRUE	1	GO:0005739	mitochondrion	CC	110	64	32	2	1	1.3e-12	2e-10	Cyt-c1, Gdh, CG5903, ND-B16.6, SdhA, Mitofilin, Mdh2, ND-75, l(1)G0156, CG10924, ATPsyngamma, COX5A, ND-B17, CG6512, mRpL12, Nc73EF, ND-20, Cyt-c-p, ND-B12, Gpo1, CG7430, ND-PDSW, kdn, ND-18, Idh3b, CG11779, ATPsynCF6, ND-B15, Khc, Hsc70-5, COQ7, CG2658, CG5045, Scsalpha, ND-42, ATPsynF, blw, l(2)tid, YME1L, CG7772, Ucp4A, Dhc64C, CG10731, SdhB, ATPsynD, DCTN1-p150, Acon, GLS, mEFTs, SdhD, CG1226…
Thorax	IV	oxidoreductase complex	TRUE	2	GO:1990204	oxidoreductase complex	CC	30	18	8.7	2.1	1	0.00028	0.0038	Cyt-c1, ND-B16.6, SdhA, ND-75, ND-B17, Nc73EF, ND-20, ND-B12, Gpo1, CG7430, ND-PDSW, ND-18, ND-B15, ND-42, SdhB, SdhD, ND-B14.7, CG11752	CG7766, Scsalpha, Eno, Dhc64C
Thorax	IV	mitochondrion organization	TRUE	1	GO:0007005	mitochondrion organization	BP	27	16	7.8	2	1	0.00077	0.0077	CG5903, up, Mitofilin, mRpL12, ND-20, ND-18, CG11779, Khc, Hsc70-5, CG7772, Dhc64C, COX6B, tko, Rim2, mRpS29, TFAM
Thorax	III	cytosol	TRUE	1	GO:0005829	cytosol	CC	85	48	24	2	0.99	5.2e-09	1.1e-07	eEF5, RpS29, RpL10, bel, RpL5, RpS23, RpS9, RpLP1, RpS14a, RpL32, RpL24, RpL23, RpL15, l(2)gl, RpL38, Tudor-SN, CG7675, RpL35, RpL14, Gel, RpS16, RpL18, RpS27A, RpL11, Cyp1, RpS8, pAbp, RpS28b, RpL8, RpL27A, RpL9, eIF4G1, RpS27, RpS15, eEF1alpha1, RpL36A, RpLP2, RpS30, ApepP, RpL10Ab, RpS20, RpS21, RpL36, RpS5a, RpS3A, RpL29, RpL30, RpL7
Thorax	IV	organelle membrane	TRUE	1	GO:0031090	organelle membrane	CC	66	38	19	2	0.99	2.6e-07	6.6e-06	Cyt-c1, CG5903, ND-B16.6, SdhA, Mitofilin, ND-75, ATPsyngamma, COX5A, ND-B17, ND-20, Cyt-c-p, ND-B12, Gpo1, ND-PDSW, ND-18, koi, CG11779, ATPsynCF6, ND-B15, ND-42, ATPsynF, blw, YME1L, CG7772, Ucp4A, CG10731, Vha36-3, SdhB, Rop, ATPsynD, AP-1-2beta, SdhD, Syt1, COX6B, Fas3, ND-B14.7, Rim2, CG11752
Thorax	IV	mitochondrial part	TRUE	1	GO:0044429	mitochondrial part	CC	76	43	22	2	0.97	7e-08	2.6e-06	Cyt-c1, Gdh, CG5903, ND-B16.6, SdhA, Mitofilin, Mdh2, ND-75, l(1)G0156, ATPsyngamma, COX5A, ND-B17, mRpL12, Nc73EF, ND-20, Cyt-c-p, ND-B12, Gpo1, CG7430, ND-PDSW, kdn, ND-18, CG11779, ATPsynCF6, ND-B15, Scsalpha, ND-42, ATPsynF, blw, YME1L, CG7772, Ucp4A, CG10731, SdhB, ATPsynD, SdhD, COX6B, tko, ND-B14.7, Rim2, CG11752, mRpS29, CG5028
Thorax	IV	actin cytoskeleton	TRUE	1	GO:0015629	actin cytoskeleton	CC	27	15	7.8	1.9	0.94	0.0028	0.019	Prm, Act79B, up, Zasp52, Mlp60A, wupA, Mlc2, sals, Tm1, Tm2, Khc, Eps-15, cher, DCTN1-p150, alpha-Spec
Thorax	I	animal organ morphogenesis	TRUE	1	GO:0009887	animal organ morphogenesis	BP	50	23	12	1.9	0.9	0.00048	0.032	cmb, rhea, Pcyt1, capt, Dg, Dref, LamC, CG43427, shot, cora, mys, Nrg, Lam, chic, AGO2, tmod, if, Opa1, Fas2, trc, Doa, Sod2, Amph
Thorax	IV	ATP metabolic process	TRUE	24	GO:0046034	ATP metabolic process	BP	39	21	11	1.9	0.89	0.00067	0.0072	Cyt-c1, ND-B16.6, ND-75, ATPsyngamma, COX5A, ND-B17, ND-20, Cyt-c-p, ND-B12, ND-PDSW, Pglym78, ATPsynCF6, ND-B15, ND-42, Eno, blw, SdhB, ATPsynD, Gapdh1, CG32649, Pgi	AdSS, Gdh, Gpo1, Cda5
Thorax	IV	ATPase activity	TRUE	5	GO:0016887	ATPase activity	MF	26	14	7.5	1.9	0.89	0.0058	0.035	SERCA, ATPsyngamma, CG6512, ATPsynCF6, Khc, Hsc70-5, CG2658, VhaAC45, ATPsynF, blw, YME1L, Dhc64C, Vha36-3, ATPsynD	Prm, Mlc2, eEF1alpha2, DCTN1-p150
Thorax	IV	anatomical structure formation involved in morphogenesis	TRUE	1	GO:0048646	anatomical structure formation involved in morphogenesis	BP	42	22	12	1.8	0.85	0.00082	0.0077	Prm, Zasp67, up, Zasp52, Zasp66, wupA, Unc-89, tn, Mlc2, Pglym78, sals, Tm2, Khc, Mp20, Dhc64C, cher, Pax, Actn, DCTN1-p150, dl, alpha-Spec, Gapdh1
Thorax	III	structural molecule activity	TRUE	1	GO:0005198	structural molecule activity	MF	89	45	25	1.8	0.83	1.7e-06	2.5e-05	Cpr65Au, Cpr60D, Cpr47Ef, RpS29, Col4a1, RpL10, RpL5, RpS23, MagR, RpS9, RpLP1, RpS14a, RpL32, RpL24, RpL23, RpL15, RpL38, RpL35, RpL14, RpS16, RpL18, RpS27A, RpL11, RpS8, RpS28b, RpL8, RpL27A, RpL9, Yp2, RpS27, RpS15, RpL36A, RpLP2, RpS30, Ppn, RpL10Ab, RpS20, RpS21, RpL36, RpS5a, Cpr73D, RpS3A, RpL29, RpL30, RpL7
Thorax	IV	membrane protein complex	TRUE	1	GO:0098796	membrane protein complex	CC	62	31	18	1.7	0.79	0.00019	0.0029	Cyt-c1, CG5903, ND-B16.6, SdhA, ND-75, ATPsyngamma, COX5A, Ca-alpha1D, ND-B17, ND-20, ND-B12, ND-PDSW, ND-18, CG11779, ATPsynCF6, ND-B15, VhaAC45, ND-42, ATPsynF, blw, CG10731, Vha36-3, SdhB, Shal, ATPsynD, AP-1-2beta, SdhD, COX6B, ND-B14.7, CG11752, Vps26
Thorax	IV	cytoskeletal protein binding	TRUE	1	GO:0008092	cytoskeletal protein binding	MF	47	23	14	1.7	0.76	0.0021	0.016	up, Zasp52, CG14964, zormin, Zasp66, wupA, Ank2, sals, Tm1, Tm2, Unc-115a, Khc, Mp20, CG34417, parvin, tau, cher, CG5023, Actn, futsch, alpha-Spec, Jupiter, Kank
Thorax	IV	actin filament-based process	TRUE	2	GO:0030029	actin filament-based process	BP	37	18	11	1.7	0.75	0.0073	0.042	Prm, Zasp67, up, Zasp52, Zasp66, wupA, Unc-89, tn, Mlc2, sals, Tm2, Khc, parvin, cher, CG5023, Actn, sqa, Slik
Thorax	IV	sensory perception of pain	TRUE	2	GO:0019233	sensory perception of pain	BP	38	18	11	1.6	0.71	0.01	0.05	ND-75, zormin, brp, CG5989, mRpL12, ND-20, Ank2, CG7430, CG7708, VhaAC45, blw, Eps-15, Pep, AP-1-2beta, ND-B14.7, CG4587, TFAM, Vps26	CG8086, tko
Thorax	IV	cellular component morphogenesis	TRUE	1	GO:0032989	cellular component morphogenesis	BP	77	33	22	1.5	0.56	0.0039	0.024	Prm, Zasp67, up, Mitofilin, Zasp52, Zasp66, wupA, Unc-89, tn, Ank2, Nckx30C, Mlc2, sals, Tm1, Tm2, Unc-115a, Khc, Hsc70-5, Mp20, Dhc64C, tau, cher, Pax, Actn, DCTN1-p150, futsch, alpha-Spec, sm, Fas3, sqa, qsm, Slik, Kank
Thorax	IV	oxidation-reduction process	TRUE	1	GO:0055114	oxidation-reduction process	BP	89	36	26	1.4	0.48	0.0083	0.045	Cyt-c1, Gdh, ND-B16.6, GlyS, SdhA, Mdh2, ND-75, l(1)G0156, SERCA, COX5A, CG7766, ND-B17, Nc73EF, ND-20, ND-B12, Gpo1, CG7430, ND-PDSW, kdn, ND-18, Idh3b, ND-B15, GlyP, COQ7, Scsalpha, ND-42, blw, SdhB, Acon, SdhD, Gapdh1, l(2)37Bb, CG32649, Rim2, l(1)G0255, CG5028
Thorax	IV	small molecule metabolic process	TRUE	1	GO:0044281	small molecule metabolic process	BP	120	48	35	1.4	0.47	0.0027	0.019	Cyt-c1, Gdh, ND-B16.6, GlyS, pdgy, SdhA, Mdh2, ND-75, l(1)G0156, CG10924, SERCA, ATPsyngamma, COX5A, ND-B17, Nc73EF, ND-20, Cyt-c-p, ND-B12, Gpo1, CG7430, ND-PDSW, Lpin, Pglym78, kdn, Idh3b, ATPsynCF6, ND-B15, GlyP, COQ7, Scsalpha, ND-42, Eno, blw, SdhB, ATPsynD, AdSS, Acon, CG4603, GLS, dl, SdhD, CG12264, Gapdh1, CG32649, sqa, l(1)G0255, CG5028, Pgi

## Sheet: Quad GO enricht, prot wol neg
Tissue	Quadrant	Primary	Is.primary	Terms.in.cluster	GO.ID	Term	Ontology	Annotated	Significant	Expected	Enrichment	log2Enrichment	Fisher	Primary.Fisher.adj	Genes	Genes.in.secondary
Fat	I	organic acid metabolic process	TRUE	1	GO:0006082	organic acid metabolic process	BP	130	44	26	1.7	0.77	7e-05	0.017	Gnmt, CG11796, CG11899, hgo, Idh, CG6543, CG9149, Faa, CG31075, ATPCL, Gdh, bgm, scu, CG3999, Gip, Mccc1, ACC, Eip55E, Cbs, CG10932, CG5599, CG7280, HDAC6, CG17896, Gapdh1, Mdh1, CG12173, CG7860, CG4860, Sucb, AsnRS, SerRS, aay, CG1461, LysRS, Hex-A, Men, AsnRS-m, Mccc2, CG16935, ValRS, CG17110, CG6428, LeuRS-m
Fat	II	negative regulation of Notch signaling pathway	TRUE	1	GO:0045746	negative regulation of Notch signaling pathway	BP	6	6	1.5	4	2	0.00023	0.0038	shrb, Vps4, l(2)gl, Vps2, Dap160, krz
Fat	II	midbody	TRUE	3	GO:0030496	midbody	CC	8	7	2	3.5	1.8	0.00036	0.0056	Map205, Cam, cindr, shrb, Patronin, ALiX, DCTN1-p150	skap, 14-3-3epsilon
Fat	II	renal tubule development	TRUE	4	GO:0061326	renal tubule development	BP	7	6	1.7	3.4	1.8	0.0013	0.014	mbc, wal, Egfr, scrib, Pvr, Ras85D
Fat	II	serine-type endopeptidase inhibitor activity	TRUE	5	GO:0004867	serine-type endopeptidase inhibitor activity	MF	6	5	1.5	3.3	1.7	0.0045	0.03	IM33, Spn42Da, CG10031, Spn42Dd, CG34454	Tep2, cer, Cys, CG8066
Fat	II	endosomal part	TRUE	2	GO:0044440	endosomal part	CC	13	10	3.2	3.1	1.6	0.00011	0.0024	Stam, shrb, Ccz1, CG14184, Vps60, Vps37B, Vps4, Hrs, CG14977, Vps2	Atg8a, Vha16-1, CG6903
Fat	II	endosome transport via multivesicular body sorting pathway	TRUE	3	GO:0032509	endosome transport via multivesicular body sorting pathway	BP	11	8	2.7	2.9	1.6	0.0011	0.013	shrb, Ccz1, Vps60, kst, Vps37B, Hrs, Vps2, AnxB9	Stam, Rab9, rush, CG6903
Fat	II	feeding behavior	TRUE	1	GO:0007631	feeding behavior	BP	9	7	2.2	3.1	1.6	0.0013	0.014	S6k, for, foxo, bigmax, SLC5A11, Pka-R1, Rac2
Fat	II	ESCRT complex	TRUE	1	GO:0036452	ESCRT complex	CC	8	6	2	3	1.6	0.0041	0.028	Stam, shrb, Vps60, Vps37B, Hrs, Vps2
Fat	II	enzyme inhibitor activity	TRUE	1	GO:0004857	enzyme inhibitor activity	MF	20	14	5	2.8	1.5	2.5e-05	0.00074	CG17124, Tep2, IM33, cer, Spn42Da, Cys, CG10031, I-2, Spn42Dd, 14-3-3epsilon, 14-3-3zeta, l(2)gl, CG8066, CG34454
Fat	II	late endosome	TRUE	2	GO:0005770	late endosome	CC	13	9	3.2	2.8	1.5	0.00092	0.011	Rab9, Rab39, shrb, Ccz1, rush, CG14184, Hrs, CG14977, Vps2	Stam, Vps60, Vps37B, ALiX, Vps4
Fat	II	endosome membrane	TRUE	4	GO:0010008	endosome membrane	CC	10	7	2.5	2.8	1.5	0.0033	0.025	shrb, CG14184, Vps60, Vps37B, Vps4, CG14977, Vps2	Vha16-1, CG6903, mino, Sec22, Fis1
Fat	II	positive regulation of protein phosphorylation	TRUE	7	GO:0001934	positive regulation of protein phosphorylation	BP	20	13	5	2.6	1.4	0.00016	0.0031	Tctp, Cka, Slik, CG14184, drk, ALiX, 14-3-3epsilon, 14-3-3zeta, Atg9, Dap160, Pvr, Ras85D, Mkk4	Hrs, krz, skap
Fat	II	pyridine nucleotide metabolic process	TRUE	4	GO:0019362	pyridine nucleotide metabolic process	BP	18	12	4.5	2.7	1.4	0.00021	0.0036	Ald, Pglym78, Pgk, CG8080, Pgi, Tpi, Gpdh1, Ldh, CG17333, Eno, Nadsyn, Taldo
Fat	II	myotube differentiation	TRUE	3	GO:0014902	myotube differentiation	BP	17	11	4.2	2.6	1.4	0.00057	0.0083	Pglym78, mbc, Pgk, S6k, Tpi, foxo, Ldh, ens, Akt1, Rac2, Khc	Egfr, up
Fat	II	myoblast fusion	TRUE	4	GO:0007520	myoblast fusion	BP	14	9	3.5	2.6	1.4	0.002	0.018	Pglym78, mbc, Pgk, S6k, Tpi, foxo, Ldh, Akt1, Rac2	EloB, Sply
Fat	II	carbohydrate derivative catabolic process	TRUE	1	GO:1901136	carbohydrate derivative catabolic process	BP	12	8	3	2.7	1.4	0.0026	0.021	pn, Idgf5, Gpdh1, Idgf6, CG8353, Oscillin, Adgf-D, Idgf3
Fat	II	carbohydrate binding	TRUE	1	GO:0030246	carbohydrate binding	MF	12	8	3	2.7	1.4	0.0026	0.021	CG18135, Lectin-galC1, CG9008, LManII, galectin, Hex-C, Mp, LManI
Fat	II	glycolytic process	TRUE	10	GO:0006096	glycolytic process	BP	11	7	2.7	2.5	1.4	0.0072	0.04	Ald, Pglym78, Pgk, Pgi, Tpi, Ldh, Eno	Pdk, PCB, Aldh, awd, Adk3
Fat	II	purine nucleoside monophosphate biosynthetic process	TRUE	10	GO:0009127	purine nucleoside monophosphate biosynthetic process	BP	11	7	2.7	2.5	1.4	0.0072	0.04	Paics, AMPdeam, sun, ATPsynbeta, Pfas, ATPsynD, Adk3	CG11089, awd, foxo, CG6767, CG8417, Oga
Fat	II	carbohydrate biosynthetic process	TRUE	1	GO:0016051	carbohydrate biosynthetic process	BP	11	7	2.7	2.5	1.4	0.0072	0.04	Tps1, CG5171, PCB, Pgi, Pgm, CG10924, PhKgamma
Fat	II	NADH dehydrogenase (quinone) activity	TRUE	9	GO:0050136	NADH dehydrogenase (quinone) activity	MF	11	7	2.7	2.5	1.4	0.0072	0.04	ND-B14, ND-ASHI, ND-B14.5B, ND-19, ND-39, ND-B22, ND-30	CG11752, NP15.6
Fat	II	negative regulation of neuroblast proliferation	TRUE	12	GO:0007406	negative regulation of neuroblast proliferation	BP	9	6	2.2	2.7	1.4	0.0097	0.049	COX5A, COX4, UQCR-14, l(2)gl, CG7834, tws	jar, Dap160, foxo, Vps60, scrib, Akt1, Ras85D
Fat	II	negative regulation of catalytic activity	TRUE	4	GO:0043086	negative regulation of catalytic activity	BP	9	6	2.2	2.7	1.4	0.0097	0.049	cer, Spn42Da, drk, Spn42Dd, l(2)gl, krz	I-2, ATPsynD, Hrs, Not3
Fat	II	monooxygenase activity	TRUE	1	GO:0004497	monooxygenase activity	MF	9	6	2.2	2.7	1.4	0.0097	0.049	Fmo-1, Hn, Fmo-2, Skeletor, Cyp28a5, Cyp6a8
Fat	II	wound healing	TRUE	2	GO:0042060	wound healing	BP	25	15	6.2	2.4	1.3	0.00018	0.0034	CG11089, Stam, Pkn, Npc2g, Idgf5, Idgf6, Egfr, Mtpalpha, kst, Gs1l, fon, Npc2h, CG30010, Idgf3, Rac2	Akt1
Fat	II	carbohydrate catabolic process	TRUE	1	GO:0016052	carbohydrate catabolic process	BP	16	10	4	2.5	1.3	0.0015	0.015	Ald, fbp, Pglym78, Pgk, Pgi, Tpi, Ldh, PhKgamma, Eno, CG6910
Fat	II	positive regulation of MAPK cascade	TRUE	5	GO:0043410	positive regulation of MAPK cascade	BP	16	10	4	2.5	1.3	0.0015	0.015	Cka, CG14184, drk, ALiX, 14-3-3epsilon, 14-3-3zeta, Atg9, Pvr, Ras85D, Mkk4	ATPsynD, Rac2, CG10960, CG14977, CG12213
Fat	II	cell fate determination	TRUE	1	GO:0001709	cell fate determination	BP	15	9	3.7	2.4	1.3	0.0039	0.028	srp, jar, spen, Egfr, 14-3-3epsilon, 14-3-3zeta, l(2)gl, Ras85D, DCTN1-p150
Fat	II	regulation of protein phosphorylation	TRUE	5	GO:0001932	regulation of protein phosphorylation	BP	31	18	7.7	2.3	1.2	7.5e-05	0.0018	Tctp, Cka, Slik, CG14184, drk, ALiX, 14-3-3epsilon, ATPsynD, Hrs, 14-3-3zeta, l(2)gl, Pka-R1, Atg9, Dap160, Pvr, Ras85D, Mkk4, krz	CG17124, I-2, Atg8a, LKRSDH
Fat	II	nucleotide biosynthetic process	TRUE	3	GO:0009165	nucleotide biosynthetic process	BP	22	13	5.5	2.4	1.2	0.00062	0.0088	CG11089, Paics, CG6767, AMPdeam, CG8080, sun, ATPsynbeta, Pfas, awd, foxo, ATPsynD, Nadsyn, Adk3	fu12, mino
Fat	II	response to ethanol	TRUE	2	GO:0045471	response to ethanol	BP	21	12	5.2	2.3	1.2	0.0015	0.015	Shmt, whd, ry, Akap200, Egfr, AcCoAS, fu12, Aldh, Drat, Pka-C1, Pka-R1, Gclm	Nurf-38, l(2)gl, E(bx)
Fat	II	dorsal closure	TRUE	4	GO:0007391	dorsal closure	BP	17	10	4.2	2.4	1.2	0.0029	0.023	srp, jar, Pkn, mbc, Cka, Egfr, l(2)gl, scrib, Rac2, Ras85D	vib, wal, drk, tws, Hmgs
Fat	II	microtubule binding	TRUE	2	GO:0008017	microtubule binding	MF	18	10	4.5	2.2	1.2	0.0051	0.032	apolpp, Map205, jar, CLIP-190, awd, Patronin, kst, lva, ens, Khc
Fat	II	negative regulation of cell development	TRUE	2	GO:0010721	negative regulation of cell development	BP	16	9	4	2.3	1.2	0.0071	0.04	Bruce, Egfr, COX5A, COX4, UQCR-14, l(2)gl, CG7834, tws, Ras85D	srp, lqf, krz
Fat	II	long-term memory	TRUE	1	GO:0007616	long-term memory	BP	14	8	3.5	2.3	1.2	0.0098	0.049	Hn, cer, for, pst, CG1910, Tomosyn, Gclm, Adf1
Fat	II	phosphorylation	TRUE	1	GO:0016310	phosphorylation	BP	110	57	27	2.1	1.1	2e-10	4.4e-08	CG17124, Ald, Pglym78, Pkn, Pgk, ND-B14, S6k, Cam, Pgi, for, Tpi, awd, Galk, Tctp, wal, Cka, Egfr, Ldh, ND-ASHI, Slik, CG7328, ND-B14.5B, CG14184, Wnk, COX5A, COX4, PKD, Hex-C, drk, ALiX, Etf-QO, PhKgamma, CG9886, Eno, 14-3-3epsilon, ND-19, ATPsynD, UQCR-14, Hrs, CG3534, 14-3-3zeta, l(2)gl, Pka-C1, Pask, Pka-R1, CG7834, UQCR-6.4, ND-39, ND-B22, Atg9, Akt1, Dap160, Pvr, Rac2, Ras85D, Mkk4, krz
Fat	II	nucleotide metabolic process	TRUE	3	GO:0009117	nucleotide metabolic process	BP	75	39	19	2.1	1.1	2.3e-07	1.5e-05	CG11089, Paics, CG6767, AMPdeam, Ald, pn, Pglym78, Pgk, ND-B14, CG8080, sun, ATPsynbeta, Pgi, Tpi, Gpdh1, Pfas, awd, wal, foxo, Ldh, ND-ASHI, ND-B14.5B, CG17333, COX5A, COX4, Etf-QO, Eno, ND-19, ATPsynD, Nadsyn, Adk1, UQCR-14, CG7834, UQCR-6.4, Adk3, ND-39, ND-B22, CG17224, Taldo	ry, fu12, mino
Fat	II	purine-containing compound metabolic process	TRUE	1	GO:0072521	purine-containing compound metabolic process	BP	67	36	17	2.2	1.1	2.4e-07	1.5e-05	CG11089, Paics, AMPdeam, Ald, CG33054, pn, ry, Pglym78, Pgk, ND-B14, sun, ATPsynbeta, Pgi, Tpi, Pfas, awd, wal, foxo, Ldh, ND-ASHI, ND-B14.5B, COX5A, COX4, Etf-QO, Eno, ND-19, CG30016, ATPsynD, Adk1, UQCR-14, Adgf-D, CG7834, UQCR-6.4, Adk3, ND-39, ND-B22
Fat	II	protein phosphorylation	TRUE	1	GO:0006468	protein phosphorylation	BP	60	32	15	2.1	1.1	1.5e-06	7.1e-05	Pkn, S6k, Cam, for, awd, Tctp, Cka, Egfr, Slik, CG14184, Wnk, PKD, drk, ALiX, PhKgamma, CG9886, 14-3-3epsilon, ATPsynD, Hrs, 14-3-3zeta, l(2)gl, Pka-C1, Pask, Pka-R1, Atg9, Akt1, Dap160, Pvr, Rac2, Ras85D, Mkk4, krz
Fat	II	purine ribonucleotide metabolic process	TRUE	4	GO:0009150	purine ribonucleotide metabolic process	BP	58	31	14	2.1	1.1	2e-06	8.9e-05	Paics, AMPdeam, Ald, pn, Pglym78, Pgk, ND-B14, sun, ATPsynbeta, Pgi, Tpi, Pfas, awd, wal, foxo, Ldh, ND-ASHI, ND-B14.5B, COX5A, COX4, Etf-QO, Eno, ND-19, ATPsynD, Adk1, UQCR-14, CG7834, UQCR-6.4, Adk3, ND-39, ND-B22	CG11089, CG17333, Taldo
Fat	II	purine nucleoside monophosphate metabolic process	TRUE	4	GO:0009126	purine nucleoside monophosphate metabolic process	BP	53	28	13	2.1	1.1	8.8e-06	0.00035	Paics, AMPdeam, Ald, Pglym78, Pgk, ND-B14, sun, ATPsynbeta, Pgi, Tpi, Pfas, wal, Ldh, ND-ASHI, ND-B14.5B, COX5A, COX4, Etf-QO, Eno, ND-19, ATPsynD, Adk1, UQCR-14, CG7834, UQCR-6.4, Adk3, ND-39, ND-B22	CG6767
Fat	II	autophagy	TRUE	1	GO:0006914	autophagy	BP	30	16	7.5	2.1	1.1	0.00071	0.0097	Atg3, Bruce, Atg8a, srp, lqf, S6k, Atg4a, shrb, Ccz1, foxo, wrd, wdb, Sod1, Vps4, Atg9, Ras85D
Fat	II	signaling receptor binding	TRUE	1	GO:0005102	signaling receptor binding	MF	20	11	5	2.2	1.1	0.0036	0.027	apolpp, Nplp2, sun, Idgf5, Idgf6, Gbp2, RhoGAPp190, drk, Adgf-D, E(bx), Idgf3
Fat	II	carbohydrate metabolic process	TRUE	1	GO:0005975	carbohydrate metabolic process	BP	110	54	27	2	1	3.6e-09	5.3e-07	Ald, Tps1, srp, fbp, Pglym78, CG5171, Gale, Pgk, PCB, ATPsynbeta, FASN1, l(1)G0196, Pgi, Pgm, Idgf5, Tpi, Gpdh1, Idgf6, Galk, Mondo, Egfr, foxo, CG9008, bigmax, Ldh, LManII, CG7328, Oscillin, CG17333, tobi, CG10924, PKD, Hex-C, PhKgamma, Eno, Prosalpha1, CG33080, CG3534, CG8475, 14-3-3zeta, CG15117, CG8417, Pask, LManI, CG11594, Idgf3, Galt, CG6910, Akt1, kdn, Cda5, Jafrac1, Oga, Taldo
Fat	II	nucleobase-containing small molecule metabolic process	TRUE	1	GO:0055086	nucleobase-containing small molecule metabolic process	BP	93	47	23	2	1	3.9e-08	4.3e-06	CG16758, CG11089, Paics, CG6767, AMPdeam, Ald, CG33054, pn, su(r), ry, Pglym78, Pgk, CRMP, ND-B14, CG8080, sun, ATPsynbeta, Pgi, Tpi, Gpdh1, Pfas, awd, wal, CG8353, foxo, Ldh, ND-ASHI, ND-B14.5B, CG17333, COX5A, COX4, Etf-QO, Eno, ND-19, CG30016, ATPsynD, Nadsyn, Adk1, UQCR-14, Adgf-D, CG7834, UQCR-6.4, Adk3, ND-39, ND-B22, CG17224, Taldo
Fat	II	ATP metabolic process	TRUE	8	GO:0046034	ATP metabolic process	BP	47	24	12	2.1	1	8.2e-05	0.0019	Ald, Pglym78, Pgk, ND-B14, sun, ATPsynbeta, Pgi, Tpi, wal, Ldh, ND-ASHI, ND-B14.5B, COX5A, COX4, Etf-QO, Eno, ND-19, ATPsynD, Adk1, UQCR-14, CG7834, UQCR-6.4, ND-39, ND-B22	awd, CG8353, Adgf-D, Adk3, CG33054
Fat	II	hexose metabolic process	TRUE	2	GO:0019318	hexose metabolic process	BP	48	24	12	2	1	0.00013	0.0025	srp, fbp, Pglym78, Gale, PCB, ATPsynbeta, Pgi, Galk, Mondo, Egfr, bigmax, LManII, CG10924, PKD, Hex-C, PhKgamma, Eno, Prosalpha1, 14-3-3zeta, Pask, LManI, Galt, Akt1, Jafrac1	CG3534
Fat	II	inner mitochondrial membrane protein complex	TRUE	3	GO:0098800	inner mitochondrial membrane protein complex	CC	36	18	9	2	1	0.00091	0.011	ND-B14, sun, ATPsynbeta, ND-ASHI, ND-B14.5B, CG11752, NP15.6, COX5A, COX4, COX6B, CG7394, ND-19, ATPsynD, UQCR-14, UQCR-6.4, ND-39, ND-B22, ND-30	wal, Mtpalpha, Scsalpha, CG7834, Thiolase
Fat	II	regulation of Notch signaling pathway	TRUE	2	GO:0008593	regulation of Notch signaling pathway	BP	24	12	6	2	1	0.0066	0.04	CRMP, lqf, shrb, Nurf-38, Fkbp14, Vps4, Hrs, l(2)gl, E(bx), Vps2, Dap160, krz	RpL13A
Fat	II	generation of precursor metabolites and energy	TRUE	1	GO:0006091	generation of precursor metabolites and energy	BP	65	32	16	2	0.98	1.4e-05	0.00047	skap, Ald, Pglym78, Pgk, ND-B14, FASN1, Pgi, Pgm, Tpi, Gpdh1, wal, foxo, Ldh, ND-ASHI, ND-B14.5B, Oscillin, Scsalpha, NP15.6, COX5A, COX4, Etf-QO, Rim2, PhKgamma, Eno, ND-19, UQCR-14, CG8475, CG7834, UQCR-6.4, ND-39, ND-B22, kdn
Fat	II	nucleoside metabolic process	TRUE	2	GO:0009116	nucleoside metabolic process	BP	65	32	16	2	0.98	1.4e-05	0.00047	CG16758, CG6767, Ald, CG33054, Pglym78, Pgk, ND-B14, sun, ATPsynbeta, Pgi, Tpi, awd, wal, CG8353, Ldh, ND-ASHI, ND-B14.5B, COX5A, COX4, Etf-QO, Eno, ND-19, ATPsynD, Adk1, UQCR-14, Adgf-D, CG7834, UQCR-6.4, Adk3, ND-39, ND-B22, CG17224
Fat	II	kinase activity	TRUE	2	GO:0016301	kinase activity	MF	55	27	14	2	0.98	7.2e-05	0.0018	Papss, Pkn, Pgk, Pdk, CG8080, S6k, CG7470, l(1)G0196, for, awd, Galk, Egfr, Slik, CG7328, Wnk, PKD, Hex-C, PhKgamma, CG9886, Adk1, CG3534, Pka-C1, Pask, Adk3, Akt1, Pvr, Mkk4	UGP, CG6767, Pect, CG11594, Galt
Fat	II	cellular carbohydrate metabolic process	TRUE	1	GO:0044262	cellular carbohydrate metabolic process	BP	53	26	13	2	0.98	9.9e-05	0.0022	Tps1, srp, Pglym78, CG5171, ATPsynbeta, FASN1, l(1)G0196, Pgm, Galk, Mondo, Egfr, foxo, bigmax, CG7328, PKD, Hex-C, PhKgamma, Eno, Prosalpha1, CG3534, CG8475, 14-3-3zeta, Pask, CG6910, Akt1, Jafrac1
Fat	II	oxidative phosphorylation	TRUE	1	GO:0006119	oxidative phosphorylation	BP	27	13	6.7	1.9	0.95	0.0071	0.04	ND-B14, wal, ND-ASHI, ND-B14.5B, COX5A, COX4, Etf-QO, ND-19, UQCR-14, CG7834, UQCR-6.4, ND-39, ND-B22
Fat	II	oxidoreductase complex	TRUE	1	GO:1990204	oxidoreductase complex	CC	27	13	6.7	1.9	0.95	0.0071	0.04	ND-B14, Gpdh1, ppl, ND-ASHI, ND-B14.5B, CG11752, NP15.6, ND-19, UQCR-14, UQCR-6.4, ND-39, ND-B22, ND-30
Fat	II	electron transfer activity	TRUE	1	GO:0009055	electron transfer activity	MF	40	19	10	1.9	0.93	0.0015	0.015	Cyp12d1-p, Cyp4p1, ry, Cyp6d4, Cyp12e1, wal, COX5A, COX4, Cyp4e2, COX6B, Fdx2, CG14407, CG6523, Cyp12c1, CG7834, UQCR-6.4, Cyp28a5, Cyp6a22, Cyp6a8
Fat	II	phosphate-containing compound metabolic process	TRUE	2	GO:0006796	phosphate-containing compound metabolic process	BP	190	88	47	1.9	0.92	2.6e-12	1.2e-09	CG11089, Paics, CG6767, CG17124, AMPdeam, CG15739, Ald, pn, ry, Pglym78, Pkn, Pgk, ND-B14, CG8080, sun, CG5577, ATPsynbeta, S6k, Cam, Pgi, for, Tpi, Gpdh1, Pfas, awd, Galk, Tctp, wal, Cka, Nurf-38, Egfr, foxo, wrd, Ldh, ND-ASHI, Slik, CG7328, ND-B14.5B, CG14184, Wnk, CG17333, COX5A, COX4, I-2, PKD, Hex-C, fu12, CanA-14F, drk, ALiX, Etf-QO, CG5567, PhKgamma, CG9886, CG3530, Eno, 14-3-3epsilon, ND-…
Fat	II	negative regulation of multicellular organismal process	TRUE	2	GO:0051241	negative regulation of multicellular organismal process	BP	30	14	7.5	1.9	0.91	0.0075	0.041	Bruce, lqf, Egfr, foxo, COX5A, COX4, UQCR-14, l(2)gl, CG7834, tws, Akt1, scrib, Ras85D, krz	srp
Fat	II	carbohydrate derivative metabolic process	TRUE	1	GO:1901135	carbohydrate derivative metabolic process	BP	110	51	27	1.9	0.9	3.6e-07	2e-05	CG16758, UGP, Paics, CG6767, AMPdeam, Ald, CG33054, pn, Pglym78, Pgk, ND-B14, sun, ATPsynbeta, Pgi, Idgf5, Tpi, Gpdh1, Pfas, Idgf6, CG4302, awd, wal, CG8353, foxo, Ldh, ND-ASHI, Gasp, ND-B14.5B, Oscillin, CG17333, COX5A, obst-E, COX4, Etf-QO, Eno, ND-19, ATPsynD, Adk1, UQCR-14, CG8417, Adgf-D, CG7834, UQCR-6.4, Adk3, ND-39, ND-B22, Idgf3, CG17224, Cda5, Oga, Taldo
Fat	II	positive regulation of signal transduction	TRUE	3	GO:0009967	positive regulation of signal transduction	BP	58	27	14	1.9	0.9	0.00023	0.0038	Stam, CRMP, lqf, sun, spen, cv-d, Cka, Nurf-38, foxo, CG10960, CG14184, Wnk, Mp, drk, ALiX, Vps4, 14-3-3epsilon, Hrs, CG14977, 14-3-3zeta, E(bx), Atg9, Pvr, CG12213, Ras85D, Mkk4, ubl
Fat	II	positive regulation of response to stimulus	TRUE	1	GO:0048584	positive regulation of response to stimulus	BP	78	36	19	1.9	0.89	2.5e-05	0.00074	Stam, imd, Dif, Pkn, CRMP, lqf, sun, spen, cv-d, Cka, Nurf-38, Egfr, foxo, CG10960, CG14184, Wnk, Mp, drk, ALiX, DPCoAC, Vps4, 14-3-3epsilon, Hrs, CG14977, 14-3-3zeta, E(bx), Atg9, Akt1, scrib, Pvr, CG12213, Rac2, Ras85D, Mkk4, CG13994, ubl
Fat	II	coenzyme metabolic process	TRUE	2	GO:0006732	coenzyme metabolic process	BP	37	17	9.2	1.8	0.88	0.004	0.028	pug, Ald, Pglym78, Pgk, CG8080, Pgi, Tpi, Gpdh1, Ldh, CG17333, CG1774, AcCoAS, Sam-S, Eno, Pcd, Nadsyn, Taldo	CG17904
Fat	II	phosphotransferase activity, alcohol group as acceptor	TRUE	1	GO:0016773	phosphotransferase activity, alcohol group as acceptor	MF	49	22	12	1.8	0.85	0.0016	0.015	Papss, Pkn, Pdk, CG8080, S6k, for, Galk, Egfr, Slik, CG7328, Wnk, PKD, Hex-C, PhKgamma, CG9886, CG3534, Pka-C1, Pask, CG11594, Akt1, Pvr, Mkk4
Fat	II	negative regulation of signal transduction	TRUE	4	GO:0009968	negative regulation of signal transduction	BP	45	20	11	1.8	0.83	0.003	0.023	pn, Stam, Cam, Akap200, shrb, Egfr, foxo, Vps60, drk, Tango9, Vps4, ATPsynD, Hrs, l(2)gl, E(bx), Pka-C1, Vps2, Dap160, Ras85D, krz	Akt1, GstO2
Fat	II	lipid binding	TRUE	1	GO:0008289	lipid binding	MF	36	16	9	1.8	0.83	0.0077	0.042	apolpp, Npc2g, vib, rush, kst, AnxB11, PKD, CG3860, CG11807, Mtp, Npc2h, cert, AnxB9, Akt1, AnxB10, CG3246
Fat	II	response to oxygen-containing compound	TRUE	1	GO:1901700	response to oxygen-containing compound	BP	60	26	15	1.7	0.8	0.0012	0.013	Shmt, whd, ry, PHGPx, FASN1, TotA, Akap200, for, Nurf-38, Mondo, Egfr, foxo, CG14184, AcCoAS, fu12, Sod1, Aldh, CG14977, l(2)gl, Drat, E(bx), Pka-C1, Pka-R1, Gclm, Akt1, Pvr
Fat	II	enzyme regulator activity	TRUE	2	GO:0030234	enzyme regulator activity	MF	60	26	15	1.7	0.8	0.0012	0.013	CG17124, Tep2, Gbs-76A, IM33, cer, Spn42Da, wrd, Cys, Gdi, RhoGAPp190, CG10031, I-2, wdb, Spn42Dd, CG7394, 14-3-3epsilon, ArfGAP3, CG8475, 14-3-3zeta, l(2)gl, Pka-R1, CG8066, tws, CG34454, RhoGDI, Gclm	mbc, Tctp, Ccz1, CG14977, eEF1beta
Fat	II	imaginal disc-derived wing morphogenesis	TRUE	7	GO:0007476	imaginal disc-derived wing morphogenesis	BP	46	20	11	1.7	0.8	0.0041	0.028	Paics, CG6767, EloB, Papss, smp-30, spen, ltl, cv-d, Egfr, Fkbp14, foxo, Vha16-1, EloC, Got1, drk, Pka-C1, Gli, scrib, clt, Ras85D	Pkn
Fat	II	intracellular signal transduction	TRUE	1	GO:0035556	intracellular signal transduction	BP	75	32	19	1.7	0.78	0.00044	0.0067	pn, Stam, imd, Rab9, Rab39, mbc, CRMP, Akap200, Cka, Gdi, CG10960, RhoGAPp190, CG14184, Vps60, PKD, drk, ALiX, 14-3-3epsilon, ATPsynD, CG14977, 14-3-3zeta, E(bx), Pka-C1, Pka-R1, Rab35, Atg9, Akt1, Pvr, CG12213, Rac2, Ras85D, Mkk4
Fat	II	instar larval or pupal morphogenesis	TRUE	4	GO:0048707	instar larval or pupal morphogenesis	BP	77	32	19	1.7	0.74	0.00077	0.01	Paics, CG6767, EloB, Papss, Atg8a, smp-30, Dif, jar, Pkn, Cam, spen, Akap200, ltl, cv-d, CG3829, Egfr, Fkbp14, foxo, bigmax, Vha16-1, EloC, Got1, drk, eEF1gamma, CG12163, l(2)gl, Pka-C1, Gli, scrib, Pvr, clt, Ras85D	Fdx2, E(bx), krz, fon
Fat	II	regulation of immune system process	TRUE	1	GO:0002682	regulation of immune system process	BP	46	19	11	1.7	0.73	0.0099	0.049	srp, imd, Dif, Nurf-38, Egfr, foxo, DPCoAC, GstO2, Spn42Dd, E(bx), Akt1, scrib, Pvr, Rac2, Ras85D, CG13994, krz, ubl, CG1572
Fat	II	multicellular organism aging	TRUE	3	GO:0010259	multicellular organism aging	BP	46	19	11	1.7	0.73	0.0099	0.049	Atg8a, ry, eEF1alpha1, sun, Indy, S6k, alpha-Est7, Tpi, Egfr, foxo, Mtpalpha, Sam-S, wdb, Sod1, 14-3-3epsilon, ATPsynD, Thiolase, Ras85D, Jafrac1
Fat	II	regulation of cell development	TRUE	2	GO:0060284	regulation of cell development	BP	46	19	11	1.7	0.73	0.0099	0.049	Bruce, mdy, Egfr, RhoGAPp190, COX5A, COX4, drk, lva, UQCR-14, l(2)gl, Pka-C1, CG7834, tws, Akt1, Dap160, Adf1, Rac2, Ras85D, Khc	srp, lqf, Pvr, krz
Fat	II	mitochondrial inner membrane	TRUE	6	GO:0005743	mitochondrial inner membrane	CC	51	21	13	1.6	0.72	0.0071	0.04	ND-B14, sun, ATPsynbeta, CG7470, ND-ASHI, ND-B14.5B, CG11752, NP15.6, COX5A, COX4, DPCoAC, Etf-QO, COX6B, CG7394, ND-19, ATPsynD, UQCR-14, UQCR-6.4, ND-39, ND-B22, ND-30	Rim2, mino, vib, 14-3-3zeta
Fat	II	imaginal disc morphogenesis	TRUE	4	GO:0007560	imaginal disc morphogenesis	BP	59	24	15	1.6	0.71	0.0049	0.031	Paics, CG6767, EloB, Papss, smp-30, jar, Pkn, spen, ltl, cv-d, Egfr, Fkbp14, foxo, Vha16-1, EloC, Got1, drk, l(2)gl, Pka-C1, Gli, scrib, Pvr, clt, Ras85D	wal, Mtp, Syb, Rac2
Fat	II	wing disc development	TRUE	1	GO:0035220	wing disc development	BP	79	32	20	1.6	0.7	0.0013	0.014	Paics, CG6767, EloB, Papss, smp-30, CG30069, mdy, Pkn, Cyp6d4, spen, CG8405, ltl, ppl, CG2767, cv-d, Egfr, Fkbp14, foxo, Vha16-1, Wnk, EloC, Got1, Sam-S, drk, 14-3-3epsilon, CG12163, Pka-C1, AnxB9, Gli, scrib, clt, Ras85D
Fat	II	sensory organ development	TRUE	1	GO:0007423	sensory organ development	BP	62	25	15	1.6	0.69	0.0047	0.03	pn, Cam, cindr, Cyp6d4, spen, CG2767, Cka, Egfr, Fkbp14, foxo, Sam-S, drk, Vps4, ArfGAP3, 14-3-3zeta, CG12163, l(2)gl, Pka-C1, tws, scrib, RpL13A, Ras85D, jagn, Khc, DCTN1-p150
Fat	II	post-embryonic animal organ development	TRUE	1	GO:0048569	post-embryonic animal organ development	BP	76	30	19	1.6	0.66	0.003	0.023	Paics, CG6767, EloB, Papss, smp-30, srp, Dif, Gale, jar, Pkn, mbc, spen, ltl, cv-d, Egfr, Fkbp14, foxo, Vha16-1, EloC, Got1, drk, RpS8, l(2)gl, Pka-C1, Gli, scrib, Pvr, clt, Ras85D, krz
Fat	II	small molecule metabolic process	TRUE	1	GO:0044281	small molecule metabolic process	BP	270	100	68	1.5	0.61	9.8e-08	8.6e-06	CG16758, CG11089, Paics, CG6767, Shmt, AMPdeam, skap, CG14688, Ald, CG33054, pn, srp, Hn, CG18609, su(r), fbp, ry, Pglym78, Adi1, Gale, yip2, Pgk, CRMP, Pdk, PCB, ND-B14, CG8080, CAHbeta, sun, ATPsynbeta, CG7470, CG31523, l(1)G0196, Pgi, Tpi, Gpdh1, CPT2, ppl, Pfas, awd, Galk, wal, Mondo, Egfr, CG8353, foxo, P5cr-2, bigmax, Ldh, ND-ASHI, LManII, Spat, ND-B14.5B, Mtpalpha, CG11134, CG17333, Scsalp…
Fat	II	response to organic substance	TRUE	1	GO:0010033	response to organic substance	BP	87	33	22	1.5	0.61	0.004	0.028	Cyp12d1-p, Shmt, Stam, whd, ry, PHGPx, FASN1, TotA, Akap200, Obp99a, for, alpha-Est7, cv-d, Nurf-38, Mondo, Egfr, foxo, CG14184, Chd64, AcCoAS, fu12, Hrs, Aldh, CG14977, l(2)gl, Drat, E(bx), Pka-C1, Pka-R1, Gclm, Cyp6a8, Akt1, Pvr
Fat	II	oxidation-reduction process	TRUE	1	GO:0055114	oxidation-reduction process	BP	180	67	45	1.5	0.59	6e-05	0.0016	Prx2540-2, Cyp12d1-p, skap, CG14688, pug, CG10512, CG3397, Cyp4p1, CG10863, Fmo-1, Hn, su(r), ry, Adi1, yip2, ND-B14, CG7470, PHGPx, FASN1, Cyp6d4, CG18547, Pgm, Gpdh1, CPT2, CREG, CG2767, Cyp12e1, foxo, CG7461, P5cr-2, Ldh, ND-ASHI, Gdi, Fmo-2, ND-B14.5B, Mtpalpha, Scsalpha, NP15.6, COX5A, COX4, Etf-QO, Rim2, Cyp4e2, PhKgamma, LKRSDH, Sod1, CG5167, ND-19, UQCR-14, CG9914, CG8475, Aldh, Drat, Cyp…
Fat	II	imaginal disc development	TRUE	1	GO:0007444	imaginal disc development	BP	100	39	26	1.5	0.59	0.0023	0.02	Paics, CG6767, EloB, Papss, smp-30, CG30069, mdy, jar, Pkn, Cyp6d4, spen, CG8405, Idgf5, ltl, ppl, Idgf6, CG2767, cv-d, Egfr, Fkbp14, foxo, Vha16-1, Wnk, EloC, Got1, Sam-S, drk, 14-3-3epsilon, CG12163, l(2)gl, Pka-C1, tws, AnxB9, Gli, Idgf3, scrib, Pvr, clt, Ras85D
Fat	II	regulation of signal transduction	TRUE	3	GO:0009966	regulation of signal transduction	BP	110	42	28	1.5	0.56	0.0023	0.02	pn, Stam, CRMP, lqf, sun, Cam, spen, Akap200, shrb, cv-d, Cka, Nurf-38, Egfr, Fkbp14, foxo, CG10960, CG14184, Vps60, Wnk, I-2, Mp, drk, ALiX, Tango9, Vps4, 14-3-3epsilon, ATPsynD, Hrs, CG14977, 14-3-3zeta, l(2)gl, E(bx), Pka-C1, Vps2, Atg9, Dap160, Pvr, CG12213, Ras85D, Mkk4, krz, ubl	Tomosyn, Akt1
Fat	II	animal organ morphogenesis	TRUE	1	GO:0009887	animal organ morphogenesis	BP	120	45	31	1.5	0.55	0.0019	0.017	Paics, CG6767, EloB, Papss, pn, smp-30, srp, Dif, jar, Pkn, Cam, Acer, cindr, spen, Akap200, ltl, cv-d, CG3829, Cka, Egfr, Fkbp14, foxo, bigmax, Vha16-1, EloC, Got1, drk, Vps4, ArfGAP3, eEF1gamma, 14-3-3zeta, CG12163, l(2)gl, Pka-C1, Gli, scrib, RpL13A, Pvr, clt, Rac2, Ras85D, jagn, Khc, up, DCTN1-p150
Fat	II	regulation of response to stimulus	TRUE	1	GO:0048583	regulation of response to stimulus	BP	150	54	37	1.5	0.54	0.00086	0.011	pn, Stam, imd, Dif, Pkn, CRMP, lqf, sun, S6k, Cam, spen, Akap200, for, shrb, cv-d, Cka, Nurf-38, Egfr, Fkbp14, foxo, CG10960, CG14184, Vps60, Wnk, I-2, Mp, drk, ALiX, DPCoAC, GstO2, Spn42Dd, Tango9, Vps4, 14-3-3epsilon, ATPsynD, Hrs, CG14977, 14-3-3zeta, l(2)gl, E(bx), Pka-C1, Vps2, Atg9, Akt1, Dap160, scrib, Pvr, CG12213, Rac2, Ras85D, Mkk4, CG13994, krz, ubl
Fat	II	tube development	TRUE	1	GO:0035295	tube development	BP	130	45	32	1.4	0.5	0.0047	0.03	Paics, CG6767, EloB, Papss, smp-30, CG30069, srp, mdy, jar, Pkn, mbc, Cyp6d4, spen, CG8405, Idgf5, ltl, ppl, Idgf6, CG2767, cv-d, wal, Egfr, Fkbp14, foxo, Vha16-1, Wnk, EloC, Got1, Sam-S, drk, Mtp, 14-3-3epsilon, CG12163, l(2)gl, Pka-C1, tws, AnxB9, Gli, Idgf3, Syb, scrib, Pvr, clt, Rac2, Ras85D
Fat	II	post-embryonic development	TRUE	1	GO:0009791	post-embryonic development	BP	120	40	29	1.4	0.48	0.0093	0.049	Paics, CG6767, EloB, Papss, Atg8a, smp-30, srp, Dif, Gale, jar, Pkn, mbc, Cam, spen, Akap200, ltl, cv-d, Fer1HCH, CG3829, Egfr, Fkbp14, foxo, bigmax, Vha16-1, EloC, Got1, drk, Fdx2, eEF1gamma, RpS8, CG12163, l(2)gl, E(bx), Pka-C1, Gli, scrib, Pvr, clt, Ras85D, krz
Fat	II	response to chemical	TRUE	1	GO:0042221	response to chemical	BP	160	55	40	1.4	0.46	0.0032	0.024	Cyp12d1-p, Shmt, Lsp2, Stam, whd, ry, S6k, Cam, PHGPx, FASN1, spen, TotA, Akap200, Obp99a, for, alpha-Est7, Rtnl1, cv-d, Fer1HCH, Nurf-38, Mondo, Egfr, foxo, CG14184, Wnk, SLC5A11, pst, Chd64, AcCoAS, fu12, Mp, drk, Sod1, kraken, 14-3-3epsilon, Hrs, Aldh, CG14977, 14-3-3zeta, l(2)gl, Drat, E(bx), Pka-C1, Pka-R1, Gclm, Atg9, Cyp6a8, Akt1, Adf1, scrib, Pvr, Pex5, Ptp69D, Khc, St1
Fat	II	oxidoreductase activity	TRUE	1	GO:0016491	oxidoreductase activity	MF	200	68	51	1.3	0.42	0.0026	0.021	Prx2540-2, Cyp12d1-p, GstO3, CG14688, pug, CG10512, CG3397, CG12224, Cyp4p1, CG10863, Fmo-1, Hn, su(r), ry, Adi1, ND-B14, CG7470, PHGPx, FASN1, Cyp6d4, CG18547, Pgi, Gpdh1, CG4716, CREG, CG2767, Cyp12e1, CG7461, P5cr-2, Ldh, ND-ASHI, Gdi, Fmo-2, ND-B14.5B, Mtpalpha, Skeletor, COX5A, COX4, Etf-QO, GstO2, Cyp4e2, LKRSDH, Sod1, COX6B, CG5167, CG5590, CG14407, ND-19, UQCR-14, CG6523, CG9914, Aldh, Dh…
Fat	III	cytosolic ribosome	TRUE	6	GO:0022626	cytosolic ribosome	CC	57	43	15	2.9	1.6	1.7e-15	6.9e-13	RpL10Ab, RpL35A, RpL5, RpS5a, RpS28b, RpS9, RpL36, RpS3, RpL34b, RpL4, RpL32, RpLP0, RpL28, RpL18, RpS6, RpS23, RpL8, RpL23, RpS11, RpL7A, RpL13, RpL3, RpS3A, RpS13, RpL12, RpS16, RpS10b, RpL14, RpL11, RpL30, RpS27, RpL9, RpS25, RpL26, sta, RpS2, RpL27A, RpL27, RpS7, RpL35, RpS4, RpL6, RpL23A	mRpS9, FASN3, eIF3m
Fat	III	cytosolic large ribosomal subunit	TRUE	2	GO:0022625	cytosolic large ribosomal subunit	CC	32	26	8.2	3.2	1.7	4.7e-11	9.5e-09	RpL10Ab, RpL35A, RpL5, RpL36, RpL34b, RpL4, RpL32, RpLP0, RpL28, RpL18, RpL8, RpL23, RpL7A, RpL13, RpL3, RpL12, RpL14, RpL11, RpL30, RpL9, RpL26, RpL27A, RpL27, RpL35, RpL6, RpL23A
Fat	III	structural molecule activity	TRUE	1	GO:0005198	structural molecule activity	MF	180	82	45	1.8	0.85	3e-10	4e-08	CG8858, Cpr49Ae, RpL10Ab, RpL35A, Lcp65Ab1, CG1368, Ank, Cpr66D, RpL5, RpS5a, Cp38, RpS28b, RpS9, RpL36, beta-Spec, RpS3, RpL34b, RpL4, vkg, RpL32, Cp15, Mhc, RpLP0, Twdlbeta, sls, CG15515, Cpr60D, RpL28, RpL18, RpS6, Cpr47Ef, RpS23, RpL8, RpL23, Chc, alpha-Cat, Cp36, RpS11, RpL7A, Cp19, RpL13, RpL3, Cpr66Cb, frm, RpS3A, RpS13, RpL12, RpS16, RpS10b, RpL14, RpL11, zye, RpL30, RpS27, RpL9, RpS25, C…
Fat	III	chorion	TRUE	2	GO:0042600	chorion	CC	13	13	3.3	3.9	2	1.9e-08	1.9e-06	CG11381, Cp7Fb, CG13114, Cp7Fc, Cp15, CG4009, ck, Pxd, Cp19, Cp16, Cp18, CG13299, Cp7Fa
Fat	III	plasma membrane protein complex	TRUE	1	GO:0098797	plasma membrane protein complex	CC	38	25	9.8	2.6	1.4	1.7e-07	1.4e-05	mew, Pmp70, Ggamma1, NaCP60E, CG17646, CG3164, CG31689, CG2316, Gbeta13F, nrv1, Chc, alpha-Cat, Hmt-1, CG5789, VhaSFD, Atpalpha, norpA, Dg, CG34120, VhaAC39-1, Vha68-2, Vha44, AP-2alpha, AP-1-2beta, Vha55
Fat	III	centrosome cycle	TRUE	2	GO:0007098	centrosome cycle	BP	34	23	8.7	2.6	1.4	2.6e-07	1.7e-05	RpL10Ab, RpL4, RpL28, RpS6, RpS23, RpL8, RpL7A, larp, chb, RpL13, RpL3, Dhc64C, RpL14, RpL11, RpL30, RpL9, RpL27A, RpL27, RpL35, RpS4, RpL6, Lis-1, RpL23A	eIF4A, Act57B
Fat	III	plasma membrane part	TRUE	1	GO:0044459	plasma membrane part	CC	70	37	18	2.1	1	6.7e-07	3.8e-05	mew, Pmp70, Inx2, Ggamma1, ogre, CG2736, NaCP60E, CG17646, CG3164, Inx3, CG31689, beta-Spec, CG2316, Gbeta13F, Cals, nrv1, Chc, alpha-Cat, spartin, Nrx-IV, Hmt-1, CG5789, zye, VhaSFD, emp, Atpalpha, norpA, Dg, CG34120, VhaAC39-1, mgl, Moe, Vha68-2, Vha44, AP-2alpha, AP-1-2beta, Vha55
Fat	III	centrosome duplication	TRUE	1	GO:0051298	centrosome duplication	BP	27	19	6.9	2.7	1.4	1.2e-06	5.4e-05	RpL10Ab, RpL4, RpL28, RpS6, RpS23, RpL8, RpL7A, RpL13, RpL3, RpL14, RpL11, RpL30, RpL9, RpL27A, RpL27, RpL35, RpS4, RpL6, RpL23A
Fat	III	ATPase activity, coupled to movement of substances	TRUE	4	GO:0043492	ATPase activity, coupled to movement of substances	MF	36	23	9.2	2.5	1.3	1.2e-06	5.4e-05	Pmp70, PMCA, CG17646, CG3164, CG31689, CG6230, CG2316, nrv1, ATPsynB, Hmt-1, CG5789, Vha100-1, SERCA, Vha68-1, VhaSFD, Atpalpha, Vha36-3, ATPsynE, CG34120, VhaAC39-1, Vha68-2, Vha44, Vha55	Tim17b
Fat	III	cytosol	TRUE	1	GO:0005829	cytosol	CC	170	70	44	1.6	0.66	4.1e-06	0.00017	RpL10Ab, RpL35A, eIF3c, Argk, RpL5, RpS5a, RpS28b, RpS9, RpL36, trol, RpS3, RpL34b, RpL4, Karybeta3, RpL32, RpLP0, eIF4G1, CG42255, RpL28, RpL18, RpS6, RpS23, bel, RpL8, RpL23, RpS11, RpL7A, larp, cher, FASN3, RpL13, RpL3, EndoA, CG31694, Tm1, RpS3A, RpS13, RpL12, RpS16, eIF4A, RpS10b, RpL14, RpL11, RpL30, Pax, RpS27, RpL9, RpS25, CkIIbeta, RpL26, sta, Lk6, RpS2, RpL27A, Ttd14, mgl, RpL27, RpS7, …
Fat	III	cytoskeleton organization	TRUE	1	GO:0007010	cytoskeleton organization	BP	140	60	37	1.6	0.7	9.2e-06	0.00031	mew, RpL10Ab, Ggamma1, Ank, beta-Spec, RpL4, mop, CalpA, spoon, Mhc, sls, Mf, Gbeta13F, RpL28, RpS6, by, RpS23, RpL8, Chc, ck, alpha-Cat, RpL7A, larp, atl, cher, wupA, chb, RpL13, RpL3, Dhc64C, Non1, RhoGAP92B, eIF4A, RpL14, RpL11, zye, RpL30, Pax, Eb1, RpL9, futsch, Dg, SRPK, RpL27A, RpL27, Tm2, RpL35, Moe, msps, RpS4, RpL6, Lis-1, sgg, tacc, rhea, Act57B, RpL23A, Vinc, Prm, Zasp66
Fat	III	cytosolic small ribosomal subunit	TRUE	2	GO:0022627	cytosolic small ribosomal subunit	CC	25	17	6.4	2.6	1.4	9.4e-06	0.00031	RpS5a, RpS28b, RpS9, RpS3, RpS6, RpS23, RpS11, RpS3A, RpS13, RpS16, RpS10b, RpS27, RpS25, sta, RpS2, RpS7, RpS4	mRpS9
Fat	III	structural constituent of chorion	TRUE	1	GO:0005213	structural constituent of chorion	MF	8	8	2.1	3.9	2	1.8e-05	0.00056	CG1368, Cp38, Cp15, Cp36, Cp19, Cp16, Cp18, Femcoat
Fat	III	active transmembrane transporter activity	TRUE	1	GO:0022804	active transmembrane transporter activity	MF	57	29	15	2	0.99	3e-05	0.00087	Pmp70, PMCA, CG15096, CG17646, CG3164, CG31689, CG13794, kcc, Tim17b, CG3036, CG6230, CG2316, nrv1, ATPsynB, Hmt-1, CG1907, CG5789, Vha100-1, SERCA, Vha68-1, VhaSFD, Atpalpha, Vha36-3, ATPsynE, CG34120, VhaAC39-1, Vha68-2, Vha44, Vha55
Fat	III	cellular component morphogenesis	TRUE	1	GO:0032989	cellular component morphogenesis	BP	160	63	41	1.5	0.62	3.7e-05	0.001	Glt, LpR2, mew, ringer, Sec61alpha, Ggamma1, uzip, babos, Cp38, Tig, trol, beta-Spec, Stat92E, spoon, Cp15, Mhc, sls, Mf, CG10874, fs(1)h, Cp36, Pxd, Cp19, cher, wupA, chb, Dhc64C, Tm1, Gtp-bp, Hrb27C, zye, CG4829, Atpalpha, Sin3A, Sar1, Pax, Rala, CG9372, Cp16, futsch, Dg, kis, Cp18, Tm2, Moe, msps, eIF3m, dnc, Slh, ndl, Lis-1, sgg, Cul4, alphaCOP, rhea, Femcoat, eIF3l, GM130, Ptp99A, Vinc, LanB…
Fat	III	transmembrane transporter activity	TRUE	1	GO:0022857	transmembrane transporter activity	MF	100	45	27	1.7	0.74	5.9e-05	0.0014	Pmp70, Inx2, PMCA, ogre, CG15096, aralar1, NaCP60E, CG17646, CG3164, Inx3, CG31689, CG13794, kcc, Tim17b, CG3036, Karybeta3, CG8249, CG6230, CG2316, Ir7d, nrv1, ATPsynB, COX8, Hmt-1, CG1907, CG5789, CG3638, Vha100-1, Mpc1, SERCA, UQCR-Q, Vha68-1, VhaSFD, COX7C, Atpalpha, Vha36-3, ATPsynE, cype, CG34120, VhaAC39-1, Vha68-2, CG1628, Vha44, Vha55, CG4239
Fat	III	plasma membrane	TRUE	1	GO:0005886	plasma membrane	CC	140	57	36	1.6	0.64	5.9e-05	0.0014	LpR2, mew, goe, stmA, Pmp70, Inx2, PMCA, Ggamma1, ogre, Argk, CG2736, Ank, NaCP60E, CG17646, uzip, CG3164, Inx3, CG31689, TM9SF2, beta-Spec, kcc, CG3036, CG2316, Gbeta13F, Cals, nrv1, PRL-1, Chc, alpha-Cat, spartin, nrm, Nrx-IV, Hmt-1, CG5789, CG3638, Vha100-1, Vha68-1, zye, VhaSFD, emp, Nep2, Atpalpha, Rala, norpA, Dg, CG34120, VhaAC39-1, mgl, Moe, Vha68-2, Vha44, Act57B, AP-2alpha, AP-1-2beta, …
Fat	III	cellular component assembly involved in morphogenesis	TRUE	1	GO:0010927	cellular component assembly involved in morphogenesis	BP	40	22	10	2.1	1.1	6.3e-05	0.0014	Cp38, spoon, Cp15, Mhc, sls, Mf, CG10874, Cp36, Pxd, Cp19, wupA, Pax, Cp16, Dg, Cp18, Tm2, ndl, Cul4, rhea, Femcoat, Prm, Zasp66
Fat	III	membrane protein complex	TRUE	1	GO:0098796	membrane protein complex	CC	120	49	31	1.6	0.67	0.00012	0.0026	mew, Pmp70, Sec61alpha, Ggamma1, NaCP60E, CG17646, CG3164, CG31689, Tim17b, Rme-8, CG2316, Gbeta13F, nrv1, Chc, alpha-Cat, EMC1, ATPsynB, COX8, Hmt-1, CG5789, Vha100-1, ND-B12, UQCR-Q, Gtp-bp, Vha68-1, VhaSFD, COX7C, Atpalpha, Sar1, Vha36-3, norpA, ND-MLRQ, Dg, ATPsynE, cype, CG34120, VhaAC39-1, Vha68-2, Slh, Vha44, SrpRbeta, ND-B17, alphaCOP, ND-20, AP-2alpha, ND-13A, AP-1-2beta, Tapdelta, Vha55
Fat	III	ovarian follicle cell development	TRUE	5	GO:0030707	ovarian follicle cell development	BP	75	34	19	1.8	0.82	0.00013	0.0027	Cp7Fb, Cp38, Cp7Fc, Stat92E, mop, Rme-8, spoon, Cp15, Mhc, Cp36, Pxd, Cp19, cher, Dhc64C, SERCA, Hrb27C, Pax, hpo, Rala, Cp16, kis, Cp18, CalpB, ndl, Lis-1, sgg, Cul4, CG4552, CG13299, rhea, Femcoat, AP-2alpha, eIF3b, Cp7Fa	Nrx-IV, zye, ck
Fat	III	ion transport	TRUE	1	GO:0006811	ion transport	BP	50	25	13	1.9	0.96	0.00016	0.003	Pmp70, Sec61alpha, PMCA, NaCP60E, CG9297, CG3036, CG6230, nrv1, ATPsynB, CG1907, CG3638, Vha100-1, Mpc1, SERCA, Vha68-1, VhaSFD, Atpalpha, Vha36-3, ATPsynE, VhaAC39-1, Vha68-2, CG1628, Vha44, Vha55, CG4239
Fat	III	extracellular matrix	TRUE	1	GO:0031012	extracellular matrix	CC	42	22	11	2	1	0.00017	0.003	Glt, Ndg, Cpr49Ae, Lcp65Ab1, Cpr66D, Tig, trol, vkg, Twdlbeta, CG15515, Cpr60D, prc, Cpr47Ef, Cpr66Cb, serp, Cpr64Ab, Cpr50Cb, Cpr49Ab, Cpr47Ee, Cpr51A, Cpr76Bd, LanB1
Fat	III	ATPase activity, coupled	TRUE	2	GO:0042623	ATPase activity, coupled	MF	73	33	19	1.8	0.81	0.00018	0.0031	Pmp70, PMCA, CG17646, CG3164, CG31689, Lon, Rm62, Mhc, CG6230, CG2316, nrv1, bel, ck, ATPsynB, Hmt-1, CG5789, Dhc64C, Vha100-1, SERCA, eIF4A, Vha68-1, Myo61F, VhaSFD, Atpalpha, Vha36-3, ATPsynE, kis, CG34120, VhaAC39-1, Vha68-2, Vha44, Lis-1, Vha55	pix
Fat	III	cation-transporting ATPase activity	TRUE	3	GO:0019829	cation-transporting ATPase activity	MF	20	13	5.1	2.5	1.3	0.00023	0.0038	PMCA, nrv1, ATPsynB, Vha100-1, SERCA, Vha68-1, VhaSFD, Atpalpha, ATPsynE, VhaAC39-1, Vha68-2, Vha44, Vha55	CG15096, kcc, CG3036, CG6230
Fat	III	microtubule cytoskeleton organization	TRUE	2	GO:0000226	microtubule cytoskeleton organization	BP	83	36	21	1.7	0.76	0.00025	0.004	RpL10Ab, beta-Spec, RpL4, mop, RpL28, RpS6, RpS23, RpL8, Chc, RpL7A, larp, atl, chb, RpL13, RpL3, Dhc64C, Non1, eIF4A, RpL14, RpL11, RpL30, Eb1, RpL9, futsch, SRPK, RpL27A, RpL27, RpL35, msps, RpS4, RpL6, Lis-1, sgg, tacc, Act57B, RpL23A	Lsd-2, Lk6, Klp31E
Fat	III	oogenesis	TRUE	4	GO:0048477	oogenesis	BP	140	54	36	1.5	0.6	0.00026	0.004	goe, Inx2, Cp7Fb, Cp38, Cp7Fc, Stat92E, Iris, mop, Rme-8, spoon, Cp15, Mhc, bel, Chc, alpha-Cat, Cp36, Pxd, Cp19, cher, chb, Dhc64C, Tm1, RpS3A, SERCA, eIF4A, Hrb27C, AGO1, Pax, CkIIbeta, hpo, Rala, Cp16, Dg, SRPK, kis, yps, Cp18, CalpB, Moe, msps, dnc, lost, ndl, Lis-1, sgg, Cul4, CG4552, CG13299, rhea, Femcoat, AP-2alpha, Sxl, eIF3b, Cp7Fa	poe, eIF4G1, Dredd, eIF3m, tacc
Fat	III	transporter activity	TRUE	1	GO:0005215	transporter activity	MF	140	53	35	1.5	0.6	0.00028	0.004	Pmp70, Inx2, Sec61alpha, PMCA, ogre, CG15096, aralar1, NaCP60E, CG17646, CG3164, Inx3, CG31689, CG13794, kcc, Tim17b, CG3036, Karybeta3, CG8249, CG6230, CG2316, Ir7d, nrv1, ATPsynB, COX8, Hmt-1, CG1907, CG5789, CG3638, Vha100-1, Mpc1, SERCA, CG5973, UQCR-Q, Vha68-1, VhaSFD, COX7C, Atpalpha, ScpX, Vha36-3, ATPsynE, cype, CG34120, VhaAC39-1, Vha68-2, CG1628, Vha44, scramb2, AP-2alpha, AP-1-2beta, V…
Fat	III	proton-transporting V-type ATPase, V1 domain	TRUE	16	GO:0033180	proton-transporting V-type ATPase, V1 domain	CC	6	6	1.5	3.9	2	0.00028	0.004	Vha68-1, VhaSFD, Vha36-3, Vha68-2, Vha44, Vha55	Vha100-1, VhaAC39-1, ATPsynB, ATPsynE, Hmt-1
Fat	III	translation	TRUE	5	GO:0006412	translation	BP	160	61	42	1.5	0.55	0.00029	0.004	RpL10Ab, RpL35A, eIF3c, CG17514, RpL5, RpS5a, RpS28b, RpS9, RpL36, RpS3, RpL34b, RpL4, RpL32, RpLP0, eIF2D, eIF4G1, RpL28, RpL18, RpS6, RpS23, RpL8, RpL23, clu, RpS11, RpL7A, RpL13, RpL3, RpS3A, RpS13, RpL12, RpS16, eIF4A, RpS10b, Rga, RpL14, Hrb27C, RpL11, Unr, AGO1, RpL30, RpS27, RpL9, RpS25, RpL26, sta, RpS2, Dg, RpL27A, RpL27, RpS7, RpL35, RpS4, RpL6, GluProRS, eIF4H1, pix, eIF3l, Sxl, RpL23A…	Gss2, CG4829, Dredd
Fat	III	cell adhesion	TRUE	2	GO:0007155	cell adhesion	BP	33	18	8.5	2.1	1.1	0.00034	0.0046	Ndg, mew, Ggamma1, ImpL2, Tig, mop, Gbeta13F, Cals, prc, alpha-Cat, nrm, Nrx-IV, Timp, zye, Pax, rhea, Vinc, LanB1	Chc
Fat	III	anatomical structure formation involved in morphogenesis	TRUE	1	GO:0048646	anatomical structure formation involved in morphogenesis	BP	110	45	29	1.5	0.63	0.00047	0.0061	mew, Inx2, Cp7Fb, poe, Cp38, Cp7Fc, Stat92E, CalpA, spoon, Cp15, Mhc, sls, Mf, CG10874, Chc, alpha-Cat, Cp36, Pxd, Cp19, cher, wupA, Timp, chb, Dhc64C, eIF4A, AGO1, Pax, Cp16, Dredd, Dg, Cp18, Tm2, Moe, eIF3m, CtBP, ndl, Lis-1, Cul4, tacc, CG13299, rhea, Femcoat, Prm, Zasp66, Cp7Fa
Fat	III	basement membrane	TRUE	3	GO:0005604	basement membrane	CC	10	8	2.6	3.1	1.6	0.00049	0.0062	Glt, Ndg, Tig, trol, vkg, prc, serp, LanB1	Twdlbeta
Fat	III	ion transmembrane transporter activity	TRUE	1	GO:0015075	ion transmembrane transporter activity	MF	62	28	16	1.8	0.81	0.00057	0.0069	PMCA, CG15096, NaCP60E, CG13794, kcc, CG3036, CG6230, Ir7d, nrv1, ATPsynB, COX8, CG1907, CG3638, Vha100-1, Mpc1, SERCA, UQCR-Q, Vha68-1, VhaSFD, COX7C, Atpalpha, ATPsynE, cype, VhaAC39-1, Vha68-2, Vha44, Vha55, CG4239
Fat	III	eggshell chorion assembly	TRUE	3	GO:0007306	eggshell chorion assembly	BP	19	12	4.9	2.5	1.3	0.00059	0.007	Cp38, spoon, Cp15, Cp36, Pxd, Cp19, Pax, Cp16, Cp18, ndl, Cul4, Femcoat	Cp7Fb, Cp7Fc, Lis-1, CG13299, Cp7Fa
Fat	III	monovalent inorganic cation transmembrane transporter activity	TRUE	3	GO:0015077	monovalent inorganic cation transmembrane transporter activity	MF	38	19	9.8	1.9	0.96	0.00099	0.011	CG15096, NaCP60E, CG13794, CG3036, nrv1, ATPsynB, COX8, Vha100-1, UQCR-Q, Vha68-1, VhaSFD, COX7C, Atpalpha, ATPsynE, cype, VhaAC39-1, Vha68-2, Vha44, Vha55	PMCA, kcc, SERCA, CG4239
Fat	III	monovalent inorganic cation transport	TRUE	2	GO:0015672	monovalent inorganic cation transport	BP	25	14	6.4	2.2	1.1	0.0011	0.013	NaCP60E, nrv1, ATPsynB, Vha100-1, Vha68-1, VhaSFD, Atpalpha, Vha36-3, ATPsynE, VhaAC39-1, Vha68-2, Vha44, Vha55, CG4239	Sec61alpha, PMCA, CG9297, CG6230, SERCA
Fat	III	inorganic ion transmembrane transport	TRUE	4	GO:0098660	inorganic ion transmembrane transport	BP	23	13	5.9	2.2	1.1	0.0015	0.016	Sec61alpha, PMCA, NaCP60E, ATPsynB, Vha100-1, SERCA, Vha68-1, VhaSFD, ATPsynE, VhaAC39-1, Vha68-2, Vha44, Vha55
Fat	III	pH reduction	TRUE	7	GO:0045851	pH reduction	BP	7	6	1.8	3.3	1.7	0.0015	0.016	Vha100-1, Vha68-1, VhaAC39-1, Vha68-2, Rbcn-3A, Vha55
Fat	III	proton transmembrane transporter activity	TRUE	1	GO:0015078	proton transmembrane transporter activity	MF	24	13	6.2	2.1	1.1	0.0026	0.026	ATPsynB, COX8, Vha100-1, UQCR-Q, Vha68-1, VhaSFD, COX7C, ATPsynE, cype, VhaAC39-1, Vha68-2, Vha44, Vha55
Fat	III	ribonucleoprotein complex	TRUE	1	GO:1990904	ribonucleoprotein complex	CC	170	60	44	1.4	0.44	0.0031	0.031	RpL10Ab, RpL35A, RpL5, RpS5a, poe, RpS28b, RpS9, RpL36, RpS3, RpL34b, RpL4, Rm62, RpL32, RpLP0, RpL28, RpL18, RpS6, RpS23, bel, RpL8, RpL23, RpS11, nonA, RpL7A, RpL13, RpL3, Dhc64C, CG30122, RpS3A, RpS13, RpL12, RpS16, eIF4A, Pur-alpha, RpS10b, CG6686, RpL14, Hrb27C, RpL11, Psi, AGO1, RpL30, RpS27, RpL9, RpS25, RpL26, sta, RpS2, RpL27A, yps, RpL27, RpS7, RpL35, RpS4, lost, RpL6, Tapdelta, RpL23A,…
Fat	III	actin filament binding	TRUE	1	GO:0051015	actin filament binding	MF	8	6	2.1	2.9	1.6	0.0048	0.047	beta-Spec, alpha-Cat, cher, Tm1, rhea, Vinc
Fat	III	cellular cation homeostasis	TRUE	7	GO:0030003	cellular cation homeostasis	BP	15	9	3.8	2.3	1.2	0.0049	0.047	PMCA, Vha100-1, SERCA, Vha68-1, norpA, VhaAC39-1, Vha68-2, Rbcn-3A, Vha55	uex, Lpin, Adck, CG8628
Fat	III	negative regulation of neuron apoptotic process	TRUE	11	GO:0043524	negative regulation of neuron apoptotic process	BP	6	5	1.5	3.2	1.7	0.0052	0.047	RpS3, RpL14, hpo, futsch, pix	Aac11, Dredd, rl, eIF3m, norpA
Fat	III	ATPase activity, coupled to transmembrane movement of ions, phosphorylative mechanism	TRUE	2	GO:0015662	ATPase activity, coupled to transmembrane movement of ions, phosphorylative mechanism	MF	6	5	1.5	3.2	1.7	0.0052	0.047	PMCA, CG6230, nrv1, SERCA, Atpalpha	Sec61alpha, NaCP60E, CG9297
Fat	IV	exosome (RNase complex)	TRUE	3	GO:0000178	exosome (RNase complex)	CC	8	8	2.1	3.8	1.9	2.4e-05	0.00028	Ski6, Dis3, Rrp40, Rrp4, Rrp46, Spt5, Spt6, Rrp6
Fat	IV	nucleolar part	TRUE	1	GO:0044452	nucleolar part	CC	8	8	2.1	3.8	1.9	2.4e-05	0.00028	CG4038, CG13773, CG3071, Fib, Ns1, RpI135, U3-55K, RpI12
Fat	IV	small nucleolar ribonucleoprotein complex	TRUE	1	GO:0005732	small nucleolar ribonucleoprotein complex	CC	6	6	1.6	3.8	1.9	0.00034	0.0026	CG4038, Fib, LSm7, NHP2, U3-55K, SNRPG
Fat	IV	nuclear body	TRUE	1	GO:0016604	nuclear body	CC	6	6	1.6	3.8	1.9	0.00034	0.0026	Fib, Gem3, msk, coil, bru1, Spt6
Fat	IV	nuclear pore outer ring	TRUE	1	GO:0031080	nuclear pore outer ring	CC	6	6	1.6	3.8	1.9	0.00034	0.0026	Nup43, Nup37, Nup75, Nup133, Nup107, Sec13
Fat	IV	structural constituent of nuclear pore	TRUE	1	GO:0017056	structural constituent of nuclear pore	MF	6	6	1.6	3.8	1.9	0.00034	0.0026	Nup93-1, Nup154, Nup205, Nup75, Nup62, Nup44A
Fat	IV	snoRNA binding	TRUE	1	GO:0030515	snoRNA binding	MF	6	6	1.6	3.8	1.9	0.00034	0.0026	CG4038, CG3071, NHP2, U3-55K, CG7246, l(3)07882
Fat	IV	rRNA modification	TRUE	1	GO:0000154	rRNA modification	BP	5	5	1.3	3.8	1.9	0.0013	0.0075	CG4038, Nopp140, CG8939, CG11837, NHP2
Fat	IV	U2 snRNP	TRUE	2	GO:0005686	U2 snRNP	CC	5	5	1.3	3.8	1.9	0.0013	0.0075	U2A, noi, Sf3b6, Sf3b1, snf	CG2021, CG10418, LSm7, snRNP-U1-70K, l(3)72Ab
Fat	IV	Ran GTPase binding	TRUE	5	GO:0008536	Ran GTPase binding	MF	5	5	1.3	3.8	1.9	0.0013	0.0075	CG32164, msk, Ranbp21, Cse1, Fs(2)Ket	vimar, Aos1, CG5862
Fat	IV	nuclear pore	TRUE	1	GO:0005643	nuclear pore	CC	21	20	5.6	3.6	1.8	3.5e-11	1.7e-09	Nup93-1, mbo, Nup43, Gp210, Nup154, Nup58, Nup205, Nup37, msk, Nup98-96, Aladin, Nup75, Nup62, Nup133, Nup44A, Nup107, Sec13, Nup50, CG8086, Fs(2)Ket
Fat	IV	rRNA processing	TRUE	2	GO:0006364	rRNA processing	BP	21	18	5.6	3.2	1.7	1.9e-08	5.4e-07	CG4038, CG3071, Nnp-1, CG5728, Nopp140, Fib, CG8939, CG1542, CG1671, CG8545, CG11837, NHP2, CG9799, Nop60B, CG7246, CG8414, CG3817, l(3)07882	l(1)G0020
Fat	IV	organellar small ribosomal subunit	TRUE	3	GO:0000314	organellar small ribosomal subunit	CC	14	12	3.7	3.2	1.7	5.8e-06	9.1e-05	mRpS34, mRpL3, mRpS18B, mRpS17, mRpS16, mRpS21, mRpL12, mRpS29, mRpS30, mRpS35, mRpS31, mRpS5	RpS5b
Fat	IV	RNA methyltransferase activity	TRUE	1	GO:0008173	RNA methyltransferase activity	MF	8	7	2.1	3.3	1.7	0.00055	0.0041	CG8939, CG11837, CG14544, Nsun2, CG3808, CG11109, CG6388
Fat	IV	ribosome biogenesis	TRUE	2	GO:0042254	ribosome biogenesis	BP	42	33	11	3	1.6	1.5e-12	9.1e-11	CG4038, hoip, Rs1, CG11583, CG3071, Nnp-1, CG5728, Nopp140, Fib, CG8939, RpLP0-like, Ns1, CG1542, Tsr1, CG1671, CG8545, CG11837, CG7006, NHP2, CG32409, CG9799, CG2875, Nop60B, CG7246, CG8414, CG6712, CG3817, Mys45A, l(3)07882, RpL24-like, CG13185, Ddx1, Nmd3	Gem3, me31B, aub, hfp, U2af50
Fat	IV	organellar ribosome	TRUE	3	GO:0000313	organellar ribosome	CC	35	28	9.3	3	1.6	3.8e-11	1.7e-09	mRpS34, mRpL3, mRpL17, mRpS18B, mRpS17, mRpL38, mRpL44, mRpS16, mRpS21, mRpL1, mRpL50, mRpL55, mRpL14, mRpL39, mRpL12, mRpL43, mRpS29, mRpL4, mRpL9, mRpL2, mRpS30, mRpL21, mRpS35, mRpS31, mRpL54, mRpL40, mRpL23, mRpS5	CG4679, bsf, Lrpprc2
Fat	IV	ncRNA processing	TRUE	2	GO:0034470	ncRNA processing	BP	32	25	8.5	2.9	1.6	1.2e-09	4.7e-08	CG4038, CG3071, Nnp-1, CG5728, Nopp140, Fib, CG8939, CG1542, CG1671, CG8545, CG11837, l(1)G0020, NHP2, CG9799, CG14544, Nop60B, CG7246, CG8414, CG3817, Nsun2, l(3)07882, Elp1, Tailor, CG6388, CG9596	TrpRS-m, mRpL39, beta-PheRS, MetRS, alpha-PheRS
Fat	IV	organellar large ribosomal subunit	TRUE	3	GO:0000315	organellar large ribosomal subunit	CC	22	18	5.8	3.1	1.6	8e-08	1.8e-06	mRpL3, mRpL17, mRpL38, mRpL44, mRpL1, mRpL50, mRpL55, mRpL14, mRpL39, mRpL12, mRpL43, mRpL4, mRpL9, mRpL2, mRpL21, mRpL54, mRpL40, mRpL23	RpLP0-like, RpL24-like
Fat	IV	small nuclear ribonucleoprotein complex	TRUE	1	GO:0030532	small nuclear ribonucleoprotein complex	CC	20	16	5.3	3	1.6	8e-07	1.6e-05	Nop56, hoip, CG2021, Fib, CG10418, LSm7, U2A, noi, snRNP-U1-70K, l(3)72Ab, SmD3, SNRPG, CG6841, Sf3b6, Sf3b1, snf
Fat	IV	RNA modification	TRUE	1	GO:0009451	RNA modification	BP	15	12	4	3	1.6	2.2e-05	0.00028	CG4038, Nopp140, CG8939, PUS1, CG11837, NHP2, CG14544, Nop60B, Nsun2, Elp1, CG6388, CG9596
Fat	IV	RNA polymerase complex	TRUE	4	GO:0030880	RNA polymerase complex	CC	15	12	4	3	1.6	2.2e-05	0.00028	CG13773, Rpb5, Rpb7, Rpb8, Taf4, RpI135, Top1, RpII15, RpI12, Taf6, RpII140, Ctr9	DNApol-delta
Fat	IV	RNA-dependent ATPase activity	TRUE	3	GO:0008186	RNA-dependent ATPase activity	MF	14	11	3.7	3	1.6	6.8e-05	0.0007	Rs1, CG8611, CG9143, Gem3, Hel25E, me31B, CG7483, pit, l(3)72Ab, Dbp73D, Mtr4
Fat	IV	chromosome condensation	TRUE	4	GO:0030261	chromosome condensation	BP	9	7	2.4	2.9	1.6	0.0019	0.01	RfC4, aub, Rcc1, Top1, Top2, Mcm2, slmb	Nlp, Su(var)205, Fmr1, alphaTub85E, Ddx1
Fat	IV	5'-3' RNA polymerase activity	TRUE	3	GO:0034062	5'-3' RNA polymerase activity	MF	9	7	2.4	2.9	1.6	0.0019	0.01	CG13773, Rpb5, Rpb7, RpI135, RpII15, RpI12, RpII140	Mybbp1A, DNApol-delta, eIF2Bepsilon, Tailor
Fat	IV	RNA methylation	TRUE	3	GO:0001510	RNA methylation	BP	6	5	1.6	3.1	1.6	0.0061	0.027	Nopp140, CG8939, CG14544, Nsun2, CG9596	Elp1, CG6388, Fib
Fat	IV	nuclear lamina	TRUE	2	GO:0005652	nuclear lamina	CC	6	5	1.6	3.1	1.6	0.0061	0.027	Ski6, Dis3, Rrp4, Lam, Rrp6	Saf-B, koi
Fat	IV	replication fork	TRUE	2	GO:0005657	replication fork	CC	6	5	1.6	3.1	1.6	0.0061	0.027	RPA2, Gnf1, RfC4, DNApol-delta, RpA-70	Mcm2, His2Av
Fat	IV	DNA helicase activity	TRUE	2	GO:0003678	DNA helicase activity	MF	6	5	1.6	3.1	1.6	0.0061	0.027	pont, RfC4, rept, dpa, Mcm2	Gnf1, Top1, Top2
Fat	IV	nucleolus	TRUE	1	GO:0005730	nucleolus	CC	51	38	14	2.8	1.5	5.2e-13	3.8e-11	CG4038, Nop56, CG5641, hoip, Non3, CG11583, mod, CG13773, CG3071, CG12909, Nlp, CG5728, Nopp140, Fib, Mybbp1A, CG9246, CG8939, Ns1, CG1542, Tsr1, CG8545, CG12608, mRpL55, NHP2, RpI135, pit, Top1, Non2, U3-55K, RpI12, Nop60B, CG6712, Nsun2, Mys45A, l(3)07882, l(1)G0004, CG11109, Rrp6
Fat	IV	ATP-dependent helicase activity	TRUE	3	GO:0008026	ATP-dependent helicase activity	MF	20	15	5.3	2.8	1.5	7.5e-06	0.00011	Rs1, pont, CG8611, RfC4, CG9143, Gem3, rept, Hel25E, me31B, CG7483, pit, l(3)72Ab, Dbp73D, Mtr4, Ddx1	dpa, Mcm2
Fat	IV	nuclease activity	TRUE	1	GO:0004518	nuclease activity	MF	19	14	5	2.8	1.5	2.2e-05	0.00028	Ski6, Dis3, mRpL44, Rrp4, trsn, DNApol-delta, twin, Rrp46, Rat1, CG3358, Pop2, Tudor-SN, Ddx1, Rrp6
Fat	IV	S-adenosylmethionine-dependent methyltransferase activity	TRUE	3	GO:0008757	S-adenosylmethionine-dependent methyltransferase activity	MF	15	11	4	2.8	1.5	0.00019	0.0018	Art1, CG8939, CG8545, Art3, Smyd5, CG11837, CG14544, CG7889, Nsun2, CG11109, CG6388	Fib, CG3808, aft, r
Fat	IV	DNA-directed RNA polymerase II, core complex	TRUE	2	GO:0005665	DNA-directed RNA polymerase II, core complex	CC	8	6	2.1	2.8	1.5	0.0057	0.026	Rpb5, Rpb7, Rpb8, Top1, RpII15, RpII140	Taf4, Taf6, Ctr9
Fat	IV	3'-5'-exoribonuclease activity	TRUE	7	GO:0000175	3'-5'-exoribonuclease activity	MF	8	6	2.1	2.8	1.5	0.0057	0.026	Ski6, Dis3, Rrp4, twin, Rrp46, Pop2	DNApol-delta, Rat1, Rrp6, mRpL44, trsn
Fat	IV	nuclear envelope	TRUE	1	GO:0005635	nuclear envelope	CC	38	26	10	2.6	1.4	5.8e-08	1.4e-06	Nup93-1, mbo, Nup43, Gp210, koi, CG7655, Nup154, Nup58, Nup205, Nup37, msk, Nup98-96, Aladin, Nup75, Nup62, Nup133, Nup44A, Nup107, Ref1, Cse1, Lam, bru1, Sec13, Nup50, CG8086, Fs(2)Ket
Fat	IV	catalytic step 2 spliceosome	TRUE	3	GO:0071013	catalytic step 2 spliceosome	CC	32	22	8.5	2.6	1.4	5.7e-07	1.2e-05	CG5641, CG10418, LSm7, U2A, REG, CG7483, aub, CG9684, noi, snRNP-U1-70K, l(3)72Ab, SmD3, SNRPG, CG6841, Ref1, Sf3b6, Smu1, Sf3b1, Mtr4, Ars2, hfp, snf	hoip, exu, CG2021, Hel25E, U2af50
Fat	IV	alternative mRNA splicing, via spliceosome	TRUE	6	GO:0000380	alternative mRNA splicing, via spliceosome	BP	19	13	5	2.6	1.4	0.00015	0.0014	CG5728, Saf-B, CG10418, Hel25E, snRNP-U1-70K, l(3)72Ab, CG6841, CG7185, bru1, fl(2)d, hfp, U2af50, snf	aub
Fat	IV	DNA-dependent DNA replication	TRUE	2	GO:0006261	DNA-dependent DNA replication	BP	11	8	2.9	2.7	1.4	0.0018	0.0099	RPA2, RfC4, DNApol-delta, RpA-70, pita, dpa, Orc6, Mcm2	mtSSB, Gnf1
Fat	IV	RNA processing	TRUE	1	GO:0006396	RNA processing	BP	100	68	27	2.5	1.3	2.3e-18	8.3e-16	CG4038, CG5641, hoip, exu, CG3071, bsf, Dis3, Nnp-1, CG2021, CG5728, Nopp140, Fib, CG8939, mRpL44, Saf-B, CG1542, Rrp4, CG10418, CG1671, Gem3, CG8545, LSm7, U2A, Hel25E, CG11837, l(1)G0020, NHP2, REG, Rrp46, CG7483, Larp7, aub, CG9684, CG9799, noi, CG14544, snRNP-U1-70K, l(3)72Ab, SmD3, SNRPG, CG6841, Nop60B, Ref1, CG7246, Sf3b6, Smu1, CG7185, bru1, Sf3b1, CG8414, CG3817, Nsun2, fl(2)d, Rnp4F, l(…
Fat	IV	ribonucleoprotein complex assembly	TRUE	2	GO:0022618	ribonucleoprotein complex assembly	BP	15	10	4	2.5	1.3	0.0013	0.0075	CG11583, Tsr1, Gem3, CG7006, me31B, aub, CG13185, Ddx1, hfp, U2af50
Fat	IV	macromolecule methylation	TRUE	2	GO:0043414	macromolecule methylation	BP	15	10	4	2.5	1.3	0.0013	0.0075	Art1, Nopp140, CG8939, Su(var)205, Art3, Smyd5, CG14544, CG7889, Nsun2, CG9596	aft
Fat	IV	chromatin silencing	TRUE	7	GO:0006342	chromatin silencing	BP	11	7	2.9	2.4	1.3	0.011	0.042	Su(var)205, rept, aub, Hat1, Top2, Orc6, Lam	NO66, Spt5, gro, snRNP-U1-70K
Fat	IV	mRNA processing	TRUE	2	GO:0006397	mRNA processing	BP	64	39	17	2.3	1.2	3.8e-09	1.4e-07	CG5641, hoip, exu, bsf, Dis3, CG2021, CG5728, Saf-B, Rrp4, CG10418, Gem3, LSm7, U2A, Hel25E, REG, Rrp46, CG7483, aub, CG9684, noi, snRNP-U1-70K, l(3)72Ab, SmD3, SNRPG, CG6841, Ref1, Sf3b6, Smu1, CG7185, bru1, Sf3b1, fl(2)d, Mtr4, Ars2, Ddx1, hfp, U2af50, Rrp6, snf	CG2091, twin, Pop2, Rcd-1
Fat	IV	mRNA splicing, via spliceosome	TRUE	4	GO:0000398	mRNA splicing, via spliceosome	BP	54	34	14	2.4	1.2	1.2e-08	3.7e-07	CG5641, hoip, exu, CG2021, CG5728, Saf-B, CG10418, Gem3, LSm7, U2A, Hel25E, REG, CG7483, aub, CG9684, noi, snRNP-U1-70K, l(3)72Ab, SmD3, SNRPG, CG6841, Ref1, Sf3b6, Smu1, CG7185, bru1, Sf3b1, fl(2)d, Mtr4, Ars2, Ddx1, hfp, U2af50, snf
Fat	IV	mRNA binding	TRUE	1	GO:0003729	mRNA binding	MF	46	27	12	2.2	1.2	3.2e-06	6e-05	hoip, mod, bsf, CG5728, Saf-B, CG9143, Su(var)205, U2A, mRpL55, CG4806, Srp68, snRNP-U1-70K, Ref1, Top2, Sf3b6, CG7185, DENR, Fmr1, bru1, Rnp4F, CG3808, CG4612, l(1)G0004, hfp, U2af50, snf, Nmd3
Fat	IV	regulation of mitotic cell cycle	TRUE	2	GO:0007346	regulation of mitotic cell cycle	BP	44	26	12	2.2	1.2	4.1e-06	7.4e-05	pont, gfzf, rept, Rpb5, mor, Aos1, Rpb8, RpA-70, pic, REG, me31B, MED4, Rcc1, RpII15, Spt5, Nup44A, Top2, Rpn9, Pop2, Fmr1, Capr, bru1, fzy, alphaTub85E, slmb, MBD-R2	CG7910, noi, hfp
Fat	IV	nucleoplasm part	TRUE	1	GO:0044451	nucleoplasm part	CC	37	23	9.8	2.3	1.2	4.5e-06	7.8e-05	pont, Fib, Gem3, rept, Rpb5, Rpb7, Rpb8, Taf4, msk, MED4, Top1, RpII15, Spt5, Taf6, coil, CG7185, bru1, Spt6, Mcm2, RpII140, Elp1, MBD-R2, Ctr9
Fat	IV	regulation of cell cycle phase transition	TRUE	5	GO:1901987	regulation of cell cycle phase transition	BP	33	20	8.8	2.3	1.2	3.3e-05	0.00039	pont, gfzf, rept, Rpb5, mor, Rpb8, RpA-70, pic, REG, me31B, MED4, RpII15, Spt5, Top2, Rpn9, Pop2, bru1, fzy, alphaTub85E, MBD-R2	slmb, PpV
Fat	IV	nucleus organization	TRUE	1	GO:0006997	nucleus organization	BP	16	10	4.2	2.4	1.2	0.0026	0.013	Nup93-1, Nlp, Nopp140, Gp210, Nph, Nup154, Nup205, msk, coil, Lam
Fat	IV	protein transporter activity	TRUE	1	GO:0008565	protein transporter activity	MF	17	10	4.5	2.2	1.2	0.0048	0.023	Tom70, AP-2mu, Tom20, msk, Cse1, CG34132, Cog3, AP-2sigma, Fs(2)Ket, AP-1gamma
Fat	IV	chromatin binding	TRUE	2	GO:0003682	chromatin binding	MF	15	9	4	2.3	1.2	0.0062	0.027	Su(var)205, Nup154, mRpL12, Rcc1, pita, Top2, Spt6, Mcm2, Ddx1	CG4679, Actn, Srp68, fzy
Fat	IV	DNA repair	TRUE	1	GO:0006281	DNA repair	BP	13	8	3.4	2.3	1.2	0.0081	0.034	RPA2, Gnf1, RfC4, koi, RpA-70, pic, Nup107, Ddx1
Fat	IV	chromatin remodeling	TRUE	1	GO:0006338	chromatin remodeling	BP	13	8	3.4	2.3	1.2	0.0081	0.034	pont, Nlp, Nph, Su(var)205, rept, Hel25E, mor, Fmr1
Fat	IV	nuclear lumen	TRUE	1	GO:0031981	nuclear lumen	CC	140	80	37	2.2	1.1	7.1e-16	8.6e-14	CG4038, Nop56, CG5641, hoip, Non3, pont, CG11583, Ski6, mod, CG13773, CG3071, RPA2, CG12909, Dis3, Rrp40, Nlp, CG5728, Nopp140, Fib, Mybbp1A, CG9246, CG8939, Ns1, Saf-B, CG1542, Rrp4, Tsr1, koi, Su(var)205, Gem3, CG8545, CG12608, DNApol-delta, rept, mRpL55, Rpb5, Rpb7, Smyd5, Rpb8, RpA-70, Taf4, msk, NHP2, Rrp46, RpI135, MED4, pit, Top1, RpII15, Spt5, Non2, U3-55K, RpI12, Nop60B, Ref1, Orc6, Taf6…
Fat	IV	RNA binding	TRUE	1	GO:0003723	RNA binding	MF	140	79	38	2.1	1.1	2.7e-14	2.5e-12	CG4038, CG5641, hoip, CG4679, CG11583, CG13096, mod, CG3071, bsf, Rrp40, CG2021, CG5728, Fib, Saf-B, CG1542, Rrp4, mIF2, CG10418, mRpL1, CG9143, Su(var)205, CG8545, LSm7, U2A, PUS1, mRpL55, CG7006, msk, CG4806, NHP2, me31B, CG7483, Larp7, aub, mRpL2, noi, Srp68, mRpL21, eIF3f1, snRNP-U1-70K, beta-PheRS, U3-55K, SmD3, SNRPG, CG6841, Nop60B, Ref1, Top2, CG7246, Sf3b6, eIF2Bepsilon, RpS5b, CG7185, D…
Fat	IV	mitochondrion organization	TRUE	1	GO:0007005	mitochondrion organization	BP	72	42	19	2.2	1.1	6.1e-09	2e-07	mRpS34, CG4679, mtSSB, mRpL3, bsf, mRpL17, mRpS18B, SelD, mRpS17, mRpL38, mRpL44, mRpS16, mRpS21, mRpL1, Tom70, mRpL50, mRpL55, mRpL14, mRpL39, Tom20, mRpL12, ttm50, mRpL43, mRpS29, mRpL4, mRpL9, mRpL2, mRpS30, mRpL21, mRpS35, mRpS31, CG17726, mRpL54, mRpL40, mRpL23, CG34132, Gdap1, P5CDh1, CG8004, mRpS5, Lrpprc2, CG17996
Fat	IV	nuclear transport	TRUE	2	GO:0051169	nuclear transport	BP	41	24	11	2.2	1.1	1.2e-05	0.00018	Nup93-1, mbo, Gp210, Nup154, Nup58, RanGAP, Nup205, Hel25E, msk, Nup98-96, Aladin, Rcc1, noi, Nup75, Nup133, Nup107, Cse1, Mys45A, Sec13, Nup50, slmb, U2af50, Fs(2)Ket, Nmd3
Fat	IV	cellular response to starvation	TRUE	7	GO:0009267	cellular response to starvation	BP	36	21	9.6	2.2	1.1	4.7e-05	0.00052	CG4038, CG30349, Nop56, smid, l(2)05287, CG3071, Fib, Ns1, GlyS, CG1671, l(1)G0020, NHP2, l(2)k09022, CG9799, Nop60B, CG7246, CkIIalpha, CG9422, RagA-B, CG13185, Nmd3	Hsp68
Fat	IV	DNA metabolic process	TRUE	1	GO:0006259	DNA metabolic process	BP	31	18	8.2	2.2	1.1	0.00018	0.0017	mtSSB, RPA2, Gnf1, RfC4, koi, Su(var)205, DNApol-delta, RpA-70, pic, Top1, pita, dpa, Nup107, Rat1, Top2, Orc6, Mcm2, Ddx1
Fat	IV	gene silencing	TRUE	2	GO:0016458	gene silencing	BP	26	15	6.9	2.2	1.1	0.00071	0.0051	trsn, Su(var)205, rept, me31B, aub, pita, Hat1, Top2, Orc6, Lam, Elp1, Tudor-SN, Ars2, Tailor, CRIF	Spt5
Fat	IV	G2 DNA damage checkpoint	TRUE	20	GO:0031572	G2 DNA damage checkpoint	BP	24	14	6.4	2.2	1.1	0.00093	0.0063	pont, gfzf, rept, Rpb5, Rpb8, RpA-70, pic, me31B, MED4, RpII15, Spt5, Top2, Pop2, MBD-R2	RfC4, alphaTub85E, mor
Fat	IV	protein import into nucleus	TRUE	4	GO:0006606	protein import into nucleus	BP	27	15	7.2	2.1	1.1	0.0012	0.0075	Nup93-1, mbo, Gp210, Nup205, msk, Nup98-96, Rcc1, noi, Nup75, Nup107, Cse1, Sec13, Nup50, slmb, Fs(2)Ket	CG34132, Nup154, Lam
Fat	IV	positive regulation of macromolecule biosynthetic process	TRUE	5	GO:0010557	positive regulation of macromolecule biosynthetic process	BP	26	14	6.9	2	1	0.0026	0.013	CG5641, hoip, CG3071, Su(var)205, mor, Taf4, aub, Spt5, Taf6, DENR, Spt6, MBD-R2, Ctr9, tyf	Fdx1, SPE, pont, Nup98-96, CRIF, bsf
Fat	IV	organelle lumen	TRUE	3	GO:0043233	organelle lumen	CC	210	110	57	2	0.98	6.7e-18	1.2e-15	CG4038, Nop56, mRpS34, CG5641, hoip, Non3, pont, mtSSB, CG11583, Ski6, mRpL3, mod, CG13773, CG3071, RPA2, Gabat, CG12909, mRpL17, Dis3, mRpS18B, Rrp40, Nlp, CG5728, Nopp140, Fib, Mybbp1A, slgA, CG9246, CG8939, Ns1, mRpS17, mRpL38, mRpL44, Saf-B, mRpS16, CG1542, Rrp4, Tsr1, mRpS21, koi, mRpL1, Su(var)205, Gem3, CG8545, CG12608, mRpL50, DNApol-delta, rept, mRpL55, Rpb5, Rpb7, Smyd5, mRpL14, mRpL39,…
Fat	IV	regulation of translation	TRUE	2	GO:0006417	regulation of translation	BP	33	17	8.8	1.9	0.96	0.0018	0.0099	hoip, bsf, twin, me31B, aub, Pop2, DENR, Fmr1, bru1, eIF3a, Rcd-1, eIF3d1, Ars2, Tailor, Ddx1, Lrpprc2, tyf	Spt6, SPE
Fat	IV	transferase complex	TRUE	1	GO:1990234	transferase complex	CC	43	22	11	1.9	0.95	0.00043	0.0032	pont, CG13773, morgue, DNApol-delta, rept, Rpb5, Rpb7, Rpb8, Taf4, OstDelta, RpI135, Top1, RpII15, CG14544, RpI12, Taf6, fzy, RpII140, slmb, MBD-R2, Ctr9, CG9596
Fat	IV	DNA binding	TRUE	1	GO:0003677	DNA binding	MF	59	30	16	1.9	0.94	4.4e-05	0.0005	CG5641, mtSSB, mod, RPA2, Mybbp1A, Gnf1, RfC4, trsn, Su(var)205, DNApol-delta, Rpb5, mor, RpA-70, pic, Taf4, RpI135, Top1, pita, dpa, Non2, Top2, Orc6, Spt6, Mcm2, His2Av, RpII140, CG9175, dany, MBD-R2, CG7556
Fat	IV	establishment of protein localization to organelle	TRUE	3	GO:0072594	establishment of protein localization to organelle	BP	42	21	11	1.9	0.91	0.00086	0.006	Nup93-1, mbo, Gp210, Nup154, Tom70, Nup205, Tom20, msk, Nup98-96, Rcc1, noi, Srp68, Nup75, Nup107, Cse1, CG34132, Sec13, Nup50, CG8004, slmb, Fs(2)Ket	Sec23, Lam, His2Av
Fat	IV	posttranscriptional regulation of gene expression	TRUE	1	GO:0010608	posttranscriptional regulation of gene expression	BP	43	21	11	1.8	0.88	0.0013	0.0075	hoip, bsf, trsn, twin, me31B, aub, Pop2, DENR, Fmr1, bru1, eIF3a, Rcd-1, eIF3d1, Elp1, Tudor-SN, Ars2, Tailor, Ddx1, CRIF, Lrpprc2, tyf
Fat	IV	nucleoplasm	TRUE	1	GO:0005654	nucleoplasm	CC	68	33	18	1.8	0.87	6.2e-05	0.00066	CG4038, pont, Nlp, Fib, Saf-B, Gem3, rept, Rpb5, Rpb7, Rpb8, Taf4, msk, MED4, Top1, RpII15, Spt5, Ref1, Taf6, Cse1, PIG-S, coil, CG7185, bru1, Spt6, Mcm2, RpII140, Elp1, Prosbeta5, MBD-R2, Clic, U2af50, Ctr9, Fs(2)Ket
Fat	IV	nuclear division	TRUE	2	GO:0000280	nuclear division	BP	66	32	18	1.8	0.87	8.2e-05	0.00081	Non3, pont, mgr, Nup43, RfC4, Ns1, U2A, RanGAP, Dlc90F, gammaCOP, ttm50, TBCD, aub, Rcc1, noi, RpII15, SH3PX1, pita, l(3)72Ab, Non2, SmD3, Top2, Orc6, Rpn9, CkIIalpha, bru1, fzy, alphaTub85E, Cog3, slmb, LanA, Fs(2)Ket	Pex11, Gdap1
Fat	IV	mitotic cell cycle process	TRUE	2	GO:1903047	mitotic cell cycle process	BP	100	48	27	1.8	0.81	5.2e-06	8.5e-05	Non3, pont, gfzf, mgr, Nup43, RfC4, Ns1, U2A, rept, ric8a, Rpb5, mor, Rpb8, RpA-70, Dlc90F, pic, gammaCOP, ttm50, REG, me31B, TBCD, aub, MED4, Rcc1, noi, CCT8, RpII15, SH3PX1, pita, l(3)72Ab, Spt5, dpa, Non2, SmD3, CCT4, Top2, Orc6, Rpn9, Lam, Pop2, CkIIalpha, bru1, PpV, fzy, alphaTub85E, slmb, MBD-R2, Fs(2)Ket	Aos1, Nup44A, Fmr1, Capr
Fat	IV	mitochondrial matrix	TRUE	1	GO:0005759	mitochondrial matrix	CC	70	32	19	1.7	0.78	0.00033	0.0026	mRpS34, mtSSB, mRpL3, Gabat, mRpL17, mRpS18B, slgA, mRpS17, mRpL38, mRpL44, mRpS16, mRpS21, mRpL1, mRpL50, mRpL55, mRpL14, mRpL39, mRpL12, mRpL43, mRpS29, mRpL4, mRpL9, mRpL2, mRpS30, mRpL21, mRpS35, mRpS31, mRpL54, mRpL40, mRpL23, P5CDh1, mRpS5
Fat	IV	ribonucleoprotein complex	TRUE	1	GO:1990904	ribonucleoprotein complex	CC	170	77	46	1.7	0.75	4.2e-08	1.1e-06	CG4038, Nop56, mRpS34, CG5641, hoip, mRpL3, exu, mRpL17, mRpS18B, Nnp-1, CG2021, Fib, RpLP0-like, mRpS17, mRpL38, mRpL44, mRpS16, mRpS21, CG10418, CG1671, mRpL1, Gem3, LSm7, U2A, mRpL50, Hel25E, mRpL55, mRpL14, mRpL39, mRpL12, NHP2, REG, mRpL43, mRpS29, me31B, mRpL4, mRpL9, CG7483, Larp7, aub, CG9684, CG9799, mRpL2, CG10602, noi, mRpS30, Srp68, mRpL21, snRNP-U1-70K, mRpS35, l(3)72Ab, mRpS31, U3-5…
Fat	IV	cellular macromolecule catabolic process	TRUE	2	GO:0044265	cellular macromolecule catabolic process	BP	56	25	15	1.7	0.75	0.0023	0.012	CG2091, Dis3, morgue, twin, Aos1, pic, REG, aub, Rpn7, Rpn8, Rat1, Rpn9, Vps25, Pop2, Rcd-1, fzy, Mtr4, Prosalpha4, Vps20, slmb, Rpn5, Prosbeta5, Rrp6, Rpt2, Prosbeta1	GlyS, CG8460, Bdbt, Cht2
Fat	IV	intracellular protein transport	TRUE	3	GO:0006886	intracellular protein transport	BP	74	32	20	1.6	0.7	0.0011	0.0072	Nup93-1, mbo, Gp210, CG32164, Nup154, RanGAP, Tom70, Nup205, AP-2mu, Tom20, gammaCOP, msk, Nup98-96, Rcc1, noi, Srp68, Nup75, Ranbp21, SH3PX1, Nup107, Cse1, Vti1a, Sec23, CG34132, Sec13, Cog3, Nup50, CG8004, slmb, AP-2sigma, Fs(2)Ket, AP-1gamma	ttm50, GAA1, PIG-S, Vps25, CG9175
Fat	IV	cellular response to DNA damage stimulus	TRUE	1	GO:0006974	cellular response to DNA damage stimulus	BP	65	28	17	1.6	0.7	0.0024	0.013	pont, RPA2, gfzf, Gnf1, RfC4, koi, DNApol-delta, rept, Rpb5, Rpb8, RpA-70, pic, me31B, CG7483, MED4, RpII15, Spt5, Nup107, Top2, Pop2, His2Av, RhoL, Prosalpha4, Trxr-1, Ddx1, MBD-R2, Rpt2, Prosbeta1
Fat	IV	chromatin organization	TRUE	1	GO:0006325	chromatin organization	BP	44	19	12	1.6	0.7	0.012	0.045	Art1, pont, Nlp, NO66, Nph, Su(var)205, rept, Hel25E, mor, Smyd5, l(1)G0020, aub, Hat1, Top2, Orc6, Lam, Fmr1, His2Av, Ctr9
Fat	IV	membrane organization	TRUE	1	GO:0061024	membrane organization	BP	44	19	12	1.6	0.7	0.012	0.045	Nup93-1, Nup154, AP-2mu, ttm50, GAA1, Srp68, SH3PX1, PIG-S, Lam, Fmr1, Vti1a, Sec23, CG34132, Sec13, PI4KIIIalpha, AP-2sigma, Membrin, AP-1gamma, TM9SF4
Fat	IV	chromosomal part	TRUE	2	GO:0044427	chromosomal part	CC	49	21	13	1.6	0.69	0.0089	0.036	pont, Ski6, RPA2, Gnf1, RfC4, CG4747, Su(var)205, DNApol-delta, rept, Smyd5, RpA-70, REG, Top1, Spt5, Orc6, Spt6, His2Av, fzy, Mlf, MBD-R2, Ctr9	mtSSB, Hel25E, Rcc1, pita, Top2
Fat	IV	ATPase activity	TRUE	1	GO:0016887	ATPase activity	MF	90	38	24	1.6	0.67	0.00067	0.0049	Rs1, pont, smid, Nlp, Gnf1, CG8611, RfC4, Vha100-2, Ns1, CG9143, Gem3, rept, Hel25E, Dlc90F, Trap1, me31B, CG7483, pit, CCT8, Top1, CG7627, CG2658, l(3)72Ab, Dbp73D, CCT4, ABCB7, Top2, CG9330, nmd, CG1598, Mtr4, Hsc70-1, Nsf2, CG13185, Ddx1, c12.2, Rpt2, CG11897
Fat	IV	protein-containing complex assembly	TRUE	1	GO:0065003	protein-containing complex assembly	BP	64	27	17	1.6	0.67	0.0041	0.02	CG11583, bsf, Nlp, Tsr1, Su(var)205, Gem3, CG7006, me31B, CG7483, TBCD, aub, TppII, cpb, CG17726, Fmr1, Sec23, Arpc2, Mcm2, Nsf2, CG13185, Ddx1, hfp, U2af50, Fs(2)Ket, CG17996, AP-1gamma, gish
Fat	IV	cellular response to stress	TRUE	1	GO:0033554	cellular response to stress	BP	130	54	34	1.6	0.65	8.1e-05	0.00081	CG4038, CG30349, Nop56, pont, smid, l(2)05287, CG3071, RPA2, gfzf, Fib, Gnf1, RfC4, CG5844, Ns1, GlyS, koi, CG1671, Sod3, DNApol-delta, rept, Rpb5, Rpb8, RpA-70, pic, l(1)G0020, NHP2, Trap1, me31B, l(2)k09022, CG7483, MED4, CG9799, cpb, RpII15, SH3PX1, Spt5, Nup107, Nop60B, Top2, CG7246, Pop2, CkIIalpha, His2Av, CG9422, RagA-B, RhoL, Prosalpha4, Trxr-1, CG13185, Ddx1, MBD-R2, Rpt2, Prosbeta1, Nmd3
Fat	IV	intracellular transport	TRUE	1	GO:0046907	intracellular transport	BP	110	45	29	1.6	0.65	0.00031	0.0026	Nup93-1, mbo, Gp210, stai, CG32164, Nup154, Nup58, RanGAP, Tom70, Nup205, Hel25E, AP-2mu, Tom20, Dlc90F, gammaCOP, msk, Nup98-96, Aladin, Rcc1, noi, Srp68, Nup75, cpb, Ranbp21, SH3PX1, Nup133, Nup107, Cse1, Trs23, Vti1a, Sec23, Mys45A, CG34132, Sec13, Cog3, Nup50, CG8004, slmb, Nsf2, Bet5, AP-2sigma, U2af50, Fs(2)Ket, AP-1gamma, Nmd3
Fat	IV	negative regulation of gene expression	TRUE	3	GO:0010629	negative regulation of gene expression	BP	61	25	16	1.5	0.63	0.0089	0.036	NO66, trsn, Su(var)205, rept, twin, me31B, aub, snRNP-U1-70K, pita, Spt5, Hat1, Top2, Orc6, Lam, Pop2, Fmr1, bru1, Rcd-1, Sec13, Elp1, Tudor-SN, Ars2, Tailor, gro, CRIF	SelD, cpb, CkIIalpha
Fat	IV	cellular protein localization	TRUE	2	GO:0034613	cellular protein localization	BP	94	38	25	1.5	0.61	0.0018	0.01	Nup93-1, mbo, Gp210, Actn, CG32164, Nup154, RanGAP, Tom70, Nup205, AP-2mu, Tom20, gammaCOP, msk, Nup98-96, GAA1, Rcc1, noi, Srp68, Nup75, Ranbp21, SH3PX1, Nup107, Cse1, PIG-S, Lam, Vti1a, Sec23, His2Av, CG34132, Sec13, Cog3, Nup50, CG8004, slmb, AP-2sigma, Fs(2)Ket, AP-1gamma, TM9SF4	exu, CG7483, aub, SmD3, CkIIalpha
Fat	IV	protein-containing complex subunit organization	TRUE	1	GO:0043933	protein-containing complex subunit organization	BP	110	45	30	1.5	0.59	0.001	0.0068	Art1, pont, CG11583, Nup93-1, bsf, Nlp, Gp210, NO66, Nph, Tsr1, Su(var)205, Gem3, Nup205, rept, Hel25E, mor, Smyd5, CG7006, l(1)G0020, me31B, CG7483, TBCD, aub, TppII, cpb, CG17726, Hat1, Top2, Orc6, Lam, Fmr1, Sec23, Arpc2, Mcm2, His2Av, Nsf2, CG13185, Ddx1, hfp, U2af50, Ctr9, Fs(2)Ket, CG17996, AP-1gamma, gish
Fat	IV	establishment of localization in cell	TRUE	1	GO:0051649	establishment of localization in cell	BP	140	52	36	1.5	0.54	0.001	0.0068	Nup93-1, mbo, Gp210, stai, koi, CG32164, Nup154, Nup58, RanGAP, Tom70, Nup205, Hel25E, ric8a, AP-2mu, Tom20, Dlc90F, gammaCOP, msk, Nup98-96, Aladin, Rcc1, noi, Srp68, Nup75, cpb, Ranbp21, SH3PX1, Nup133, Nup107, Top2, Syx18, Cse1, Trs23, Lam, Fmr1, Vti1a, Sec23, Mys45A, CG34132, Sec13, Cog3, Nup50, CG8004, brp, slmb, Nsf2, Bet5, AP-2sigma, U2af50, Fs(2)Ket, AP-1gamma, Nmd3
Fat	IV	nucleoside-triphosphatase activity	TRUE	4	GO:0017111	nucleoside-triphosphatase activity	MF	130	46	33	1.4	0.46	0.0069	0.029	Rs1, pont, smid, Nlp, Gnf1, CG8611, RfC4, Vha100-2, Ns1, mIF2, CG9143, Gem3, eIF2gamma, rept, Hel25E, Dlc90F, Trap1, me31B, CG7483, pit, CCT8, Top1, CG7627, CG2658, l(3)72Ab, dpa, Dbp73D, CCT4, ABCB7, Top2, CG9330, Mcm2, nmd, RagA-B, alphaTub85E, CG1598, RhoL, Mtr4, Hsc70-1, Rab10, Nsf2, CG13185, Ddx1, c12.2, Rpt2, CG11897	dUTPase, CG8891
Fat	IV	cellular localization	TRUE	1	GO:0051641	cellular localization	BP	170	62	46	1.4	0.44	0.0025	0.013	Nup93-1, mbo, exu, Gp210, stai, Actn, koi, CG32164, Nup154, Nup58, RanGAP, Tom70, Nup205, Hel25E, ric8a, AP-2mu, Tom20, Dlc90F, gammaCOP, msk, Nup98-96, GAA1, CG7483, Aladin, aub, Rcc1, noi, Srp68, Nup75, cpb, Ranbp21, SH3PX1, Nup133, Nup107, SmD3, Top2, Syx18, Cse1, PIG-S, Trs23, Lam, CkIIalpha, Fmr1, Vti1a, Sec23, His2Av, Mys45A, CG34132, Sec13, Cog3, Nup50, CG8004, brp, slmb, Nsf2, Bet5, AP-2s…
Fat	IV	cell cycle	TRUE	1	GO:0007049	cell cycle	BP	160	59	44	1.4	0.44	0.0033	0.016	Non3, pont, gfzf, mgr, Nup43, RfC4, Ns1, U2A, RanGAP, rept, ric8a, Rpb5, mor, CG7910, Aos1, Rpb8, RpA-70, Dlc90F, pic, gammaCOP, ttm50, REG, me31B, TBCD, aub, MED4, Rcc1, noi, CCT8, RpII15, SH3PX1, pita, l(3)72Ab, Spt5, Nup44A, dpa, Non2, SmD3, CCT4, Top2, Orc6, Rpn9, Lam, Pop2, CkIIalpha, Fmr1, Capr, bru1, PpV, Mcm2, fzy, alphaTub85E, Cog3, slmb, hfp, MBD-R2, LanA, Fs(2)Ket, CRIF
Fat	IV	translation	TRUE	5	GO:0006412	translation	BP	160	58	43	1.3	0.43	0.0041	0.02	mRpS34, hoip, CG4679, mRpL3, bsf, mRpL17, mRpS18B, RpLP0-like, mRpS17, mRpL38, mRpL44, mRpS16, mIF2, mRpS21, mRpL1, mRpL50, TrpRS-m, twin, mRpL55, mRpL14, mRpL39, mRpL12, mRpL43, mRpS29, me31B, mRpL4, mRpL9, CG7483, aub, mRpL2, CG10602, mRpS30, mRpL21, eIF3f1, mRpS35, beta-PheRS, mRpS31, mRpL54, mRpL40, mRpL23, eIF2Bepsilon, Pop2, RpS5b, DENR, Fmr1, bru1, MetRS, eIF3a, Rcd-1, eIF3d1, alpha-PheRS,…	Ggt-1, Spase25, GstT3, Spt6, SPE
Fat	IV	cell cycle process	TRUE	1	GO:0022402	cell cycle process	BP	140	52	38	1.3	0.43	0.0063	0.027	Non3, pont, gfzf, mgr, Nup43, RfC4, Ns1, U2A, RanGAP, rept, ric8a, Rpb5, mor, Rpb8, RpA-70, Dlc90F, pic, gammaCOP, ttm50, REG, me31B, TBCD, aub, MED4, Rcc1, noi, CCT8, RpII15, SH3PX1, pita, l(3)72Ab, Spt5, dpa, Non2, SmD3, CCT4, Top2, Orc6, Rpn9, Lam, Pop2, CkIIalpha, bru1, PpV, Mcm2, fzy, alphaTub85E, Cog3, slmb, MBD-R2, LanA, Fs(2)Ket
Gut	I	sarcomere	TRUE	4	GO:0030017	sarcomere	CC	28	24	8.5	2.8	1.5	1.6e-09	9.5e-07	CG1674, Zasp66, CG14207, sls, zormin, Mf, l(2)efl, Lasp, up, Tm1, Zasp52, Tpi, sals, Unc-89, Tm2, Ald, wupA, Prm, Actn, bt, Mlp60A, Chd64, stv, zip	Mlc2, Mp20, Mlc1
Gut	I	muscle structure development	TRUE	1	GO:0061061	muscle structure development	BP	74	45	23	2	1	3.4e-08	1e-05	Col4a1, Zasp66, vkg, sls, CAP, Mlc2, numb, LanB1, Mf, Mp20, l(2)efl, exd, how, Lasp, up, Zasp52, Tpi, SCAR, sals, shot, Pkg21D, hts, Unc-89, Tm2, ens, wupA, Dys, Prm, dock, Actn, EloB, LamC, if, Pax, bt, Mlp60A, Taf4, CG8578, CG13366, SmD3, S6k, rhea, mew, Mical, zip
Gut	I	myofibril assembly	TRUE	3	GO:0030239	myofibril assembly	BP	27	22	8.2	2.7	1.4	5e-08	1e-05	Zasp66, sls, Mlc2, Mf, l(2)efl, how, Lasp, up, Zasp52, sals, hts, Unc-89, Tm2, wupA, Prm, Actn, if, bt, CG13366, rhea, Mical, zip	Col4a1, LanB1, ens
Gut	I	striated muscle cell differentiation	TRUE	2	GO:0051146	striated muscle cell differentiation	BP	45	31	14	2.3	1.2	8.6e-08	1.1e-05	Col4a1, Zasp66, sls, Mlc2, LanB1, Mf, Mp20, l(2)efl, how, Lasp, up, Zasp52, Tpi, SCAR, sals, hts, Unc-89, Tm2, ens, wupA, Prm, dock, Actn, if, Pax, bt, CG13366, S6k, rhea, Mical, zip	numb
Gut	I	cellular component assembly involved in morphogenesis	TRUE	1	GO:0010927	cellular component assembly involved in morphogenesis	BP	41	29	12	2.3	1.2	9.2e-08	1.1e-05	Zasp66, sls, cact, Mlc2, Mf, l(2)efl, how, Lasp, up, Zasp52, sals, hts, Unc-89, Tm2, Syp, wupA, Prm, Actn, Fmr1, if, Pax, bt, CG13366, polybromo, asun, rhea, Mical, LRR, zip
Gut	I	actomyosin structure organization	TRUE	1	GO:0031032	actomyosin structure organization	BP	38	27	12	2.3	1.2	2.3e-07	2e-05	Zasp66, CG5023, sls, Mlc2, Mf, l(2)efl, how, Lasp, up, Zasp52, SCAR, sals, hts, Unc-89, Tm2, chic, wupA, Prm, Actn, pnut, if, bt, CG6867, CG13366, rhea, Mical, zip
Gut	I	cytoskeletal protein binding	TRUE	1	GO:0008092	cytoskeletal protein binding	MF	94	52	29	1.8	0.86	2.3e-07	2e-05	Zasp66, CG5023, sls, zormin, CLIP-190, CAP, apolpp, CG34417, Mp20, Lasp, nudE, cher, up, Tm1, Zasp52, Cp190, Cam, SCAR, sals, jbug, Map205, tmod, shot, hts, Tm2, by, chic, ens, Dyb, wupA, Dys, shg, chb, alpha-Cat, Actn, bif, tacc, pnut, cno, Chd64, Nedd4, cib, MICAL-like, Svil, Vinc, rhea, RpL23, Cdep, Klp10A, Mical, LRR, zip
Gut	I	Z disc	TRUE	2	GO:0030018	Z disc	CC	17	15	5.2	2.9	1.5	1.1e-06	8.6e-05	CG1674, Zasp66, CG14207, sls, zormin, l(2)efl, Lasp, Zasp52, Tpi, Ald, Actn, bt, Mlp60A, stv, zip
Gut	I	taxis	TRUE	1	GO:0042330	taxis	BP	69	40	21	1.9	0.93	1.3e-06	8.6e-05	w, dlg1, Glt, Tig, Fas3, cher, Nrg, nonA, dally, for, Cam, Fas2, SCAR, trol, shot, slgA, lap, hts, Ptp69D, Pka-R2, chic, Hrb27C, Fas1, shg, ras, dock, chb, PlexA, norpA, bif, Fmr1, Ace, if, shep, eIF2beta, CG6867, Nedd4, S6k, mew, Mical
Gut	I	sarcomere organization	TRUE	1	GO:0045214	sarcomere organization	BP	21	17	6.4	2.7	1.4	2.3e-06	0.00013	sls, l(2)efl, how, Lasp, up, sals, hts, Unc-89, Tm2, wupA, Actn, if, bt, CG13366, rhea, Mical, zip
Gut	I	axonogenesis	TRUE	2	GO:0007409	axonogenesis	BP	68	39	21	1.9	0.91	2.5e-06	0.00013	Glt, Tig, Fas3, nudE, cher, Nrg, dnc, fax, dally, for, Cam, Fas2, SCAR, trol, shot, frac, hts, Ptp69D, Pka-R2, chic, Hrb27C, Fas1, shg, ras, dock, chb, PlexA, bif, Fmr1, if, Dlic, eIF2beta, CG6867, Nedd4, mfas, S6k, mew, RhoGEF2, Mical	Imp
Gut	I	mRNA binding	TRUE	1	GO:0003729	mRNA binding	MF	52	32	16	2	1	2.6e-06	0.00013	yps, eIF4H1, how, eIF4B, bol, nonA, glo, ps, egl, Ref1, Syp, elav, Hrb27C, vig, Rm62, Imp, qkr58E-2, SF2, Psi, Fmr1, sqd, pAbp, shep, Rbp1-like, mod, B52, CG1316, Irp-1B, Rsf1, swm, CG30122, CG4806
Gut	I	cell-substrate adherens junction	TRUE	4	GO:0005924	cell-substrate adherens junction	CC	16	14	4.9	2.9	1.5	3.3e-06	0.00016	CAP, Lasp, Zasp52, Swip-1, shot, by, Actn, if, Pax, cno, Vinc, rhea, mew, LRR	shg, alpha-Cat, mbt
Gut	I	developmental maturation	TRUE	1	GO:0021700	developmental maturation	BP	68	38	21	1.8	0.87	8e-06	0.00035	tral, Lasp, Tm1, Nrg, dally, btz, glo, Fas2, lost, egl, t, Cont, tud, par-6, Syp, chic, 14-3-3zeta, Hrb27C, Imp, shg, Mkk4, chb, Fmr1, sqd, mgl, Ras85D, shep, Stam, Nacalpha, exu, SmD3, Rbsn-5, asun, frm, osa, lic, DCP1, Mical
Gut	I	locomotion	TRUE	1	GO:0040011	locomotion	BP	130	62	39	1.6	0.66	1e-05	0.00039	w, sls, dlg1, CAP, Mlc2, numb, Glt, Tig, LanB1, Fas3, how, nudE, cher, Nrg, nonA, dally, Scamp, for, Cam, Fas2, SCAR, trol, shot, slgA, lap, hts, Ptp69D, par-6, Pka-R2, chic, ens, Hrb27C, CG8963, Fas1, shg, ras, dock, chb, Pgm, Rap1, PlexA, norpA, bif, Fmr1, sqd, Ace, if, Ras85D, bbg, shep, Rab7, Stam, eIF2beta, CG6867, Nedd4, Mtl, S6k, rhea, cindr, mew, Mical, zip
Gut	I	metamorphosis	TRUE	1	GO:0007552	metamorphosis	BP	120	57	35	1.6	0.69	1e-05	0.00039	dlg1, fon, Eip63F-1, mtd, EbpIII, CG7860, Fas3, larp, how, Nrg, bol, CG10939, dally, Cam, Fas2, eEF1gamma, CG43427, tmod, shot, cmb, Cip4, sgg, by, chic, MYPT-75D, Akap200, Dys, AGO2, SF1, Eip63E, bel, EloB, Paics, bif, Pkn, if, Ras85D, shep, Rab7, CG13366, Got1, NAT1, Ect3, polybromo, Rbsn-5, Mtl, rhea, Mdh2, Strica, osa, Gprk1, Pcyt1, mew, RhoGEF2, hyd, CG12163, zip
Gut	I	actin binding	TRUE	1	GO:0003779	actin binding	MF	57	33	17	1.9	0.93	1.2e-05	0.00042	CG5023, sls, zormin, CLIP-190, CG34417, Mp20, Lasp, cher, Tm1, SCAR, sals, jbug, tmod, shot, hts, Tm2, by, chic, wupA, Dys, alpha-Cat, Actn, bif, pnut, cno, Chd64, cib, MICAL-like, Svil, Vinc, rhea, Cdep, Mical
Gut	I	axon guidance	TRUE	3	GO:0007411	axon guidance	BP	55	32	17	1.9	0.93	1.4e-05	0.00046	Glt, Tig, Fas3, cher, Nrg, dally, for, Cam, Fas2, SCAR, trol, shot, hts, Ptp69D, Pka-R2, chic, Hrb27C, Fas1, shg, ras, dock, chb, PlexA, bif, Fmr1, if, eIF2beta, CG6867, Nedd4, S6k, mew, Mical
Gut	I	animal organ morphogenesis	TRUE	1	GO:0009887	animal organ morphogenesis	BP	170	78	53	1.5	0.56	1.4e-05	0.00046	Col4a1, Amph, dlg1, numb, Eip63F-1, mtd, Lac, LanB1, Lam, CG7860, exd, Fas3, larp, how, up, Nrg, bol, CG10939, dally, Cam, Fas2, SCAR, egl, eEF1gamma, Cont, CG43427, tmod, shot, cmb, Cip4, sgg, by, chic, 14-3-3zeta, MYPT-75D, CG8963, Akap200, Dys, shg, AGO2, SF1, bel, Rap1, EloB, norpA, LamC, Paics, bif, Nhe2, Pkn, pAbp, mbt, if, Ras85D, cno, Rab7, CG13366, Got1, NAT1, Ect3, polybromo, Rbsn-5, Mt…
Gut	I	organelle assembly	TRUE	1	GO:0070925	organelle assembly	BP	58	33	18	1.9	0.9	2e-05	0.00058	Zasp66, sls, Mlc2, Mf, l(2)efl, larp, how, Lasp, up, Zasp52, Nlp, Cam, sals, tws, hts, Unc-89, Tm2, wupA, Prm, chb, Mtor, Actn, Fmr1, Nph, if, bt, CG13366, rhea, DCP1, Klp10A, Mical, LRR, zip
Gut	I	signaling receptor binding	TRUE	1	GO:0005102	signaling receptor binding	MF	23	17	7	2.4	1.3	2e-05	0.00058	Ms, endos, dlg1, numb, apolpp, Tig, sNPF, Idgf4, NPF, Tk, Nplp2, Idgf6, AstC, CG10359, dock, rhea, Gprk1
Gut	I	anatomical structure formation involved in morphogenesis	TRUE	1	GO:0048646	anatomical structure formation involved in morphogenesis	BP	130	60	38	1.6	0.64	2.1e-05	0.00058	Zasp66, sls, CLIP-190, cact, Mlc2, numb, Pdcd4, Mf, Mp20, l(2)efl, exd, how, Lasp, nudE, cher, up, rngo, Zasp52, dally, Tpi, SCAR, sals, egl, shot, hts, Unc-89, Capr, Cip4, par-6, Tm2, Syp, 14-3-3zeta, wupA, Prm, shg, dock, chb, AGO2, alpha-Cat, Actn, CG7470, tacc, Fmr1, sqd, pnut, if, Ras85D, Pax, bt, CG13366, polybromo, S6k, asun, rhea, sw, mew, RhoGEF2, Mical, LRR, zip
Gut	I	response to chemical	TRUE	1	GO:0042221	response to chemical	BP	170	76	52	1.5	0.54	3.5e-05	0.00093	ZnT35C, endos, dlg1, Glt, Tig, sNPF, Fas3, Spn, cher, Nrg, dnc, NPF, CG10939, Tk, dally, Bacc, for, Cam, Fas2, SCAR, Rtnl1, trol, shot, Tsf1, hts, Ptp69D, sgg, Pka-R2, chic, 14-3-3zeta, Hrb27C, FK506-bp1, CG8963, Akap200, Fas1, shg, ras, dock, chb, AGO2, CG30344, Obp56d, Oatp58Dc, ine, aru, bel, CG14812, FASN1, PlexA, norpA, bif, Fmr1, Ace, if, Cyp12a4, sgll, Dyrk2, Stam, eIF2beta, pzg, CG6867, C…
Gut	I	instar larval or pupal morphogenesis	TRUE	2	GO:0048707	instar larval or pupal morphogenesis	BP	110	53	34	1.6	0.66	4.4e-05	0.0011	dlg1, Eip63F-1, mtd, CG7860, Fas3, larp, how, Nrg, bol, CG10939, dally, Cam, Fas2, eEF1gamma, CG43427, tmod, shot, cmb, Cip4, sgg, by, chic, MYPT-75D, Akap200, Dys, AGO2, SF1, bel, EloB, Paics, bif, Pkn, if, Ras85D, Rab7, CG13366, Got1, NAT1, Ect3, polybromo, Rbsn-5, Mtl, rhea, Mdh2, Strica, osa, Gprk1, Pcyt1, mew, RhoGEF2, hyd, CG12163, zip	Col4a1, egl, cib
Gut	I	cellular component morphogenesis	TRUE	1	GO:0032989	cellular component morphogenesis	BP	190	83	59	1.4	0.5	5.2e-05	0.0012	Zasp66, qsm, sls, cact, Mlc2, Glt, Tig, LanB1, Mf, Mp20, l(2)efl, Fas3, how, Lasp, nudE, cher, up, Tm1, Nrg, dnc, Zasp52, fax, dally, for, Cam, Fas2, SCAR, sals, trol, shot, frac, hts, Unc-89, Ptp69D, sgg, par-6, Tm2, Syp, Pka-R2, chic, Hrb27C, wupA, BuGZ, Prm, Fas1, shg, ras, Mkk4, dock, chb, Rap1, Actn, PlexA, CG9705, bif, Fmr1, if, Ras85D, Pax, Dlic, cno, bt, CG4829, eIF2beta, Taf4, CG6867, CG…
Gut	I	cell adhesion molecule binding	TRUE	1	GO:0050839	cell adhesion molecule binding	MF	11	10	3.4	3	1.6	5.2e-05	0.0012	Tig, Fas1, shg, dock, alpha-Cat, if, mfas, rhea, cindr, mew
Gut	I	regulation of cell differentiation	TRUE	1	GO:0045595	regulation of cell differentiation	BP	70	37	21	1.7	0.79	5.7e-05	0.0013	dlg1, numb, Pdcd4, Mp20, exd, CG7834, Lasp, nudE, cher, lqf, Fas2, sals, shot, tws, sgg, Tm2, chic, Hrb27C, Imp, PlexA, norpA, bif, Fmr1, pAbp, mbt, Ras85D, Pax, Dlic, Nacalpha, exu, nudC, CG5214, Strica, osa, RhoGEF2, Mical, zip
Gut	I	cytoskeleton organization	TRUE	1	GO:0007010	cytoskeleton organization	BP	180	77	54	1.4	0.52	6.1e-05	0.0013	Zasp66, CG5023, sls, dlg1, CAP, Mlc2, tral, Mf, Lam, l(2)efl, larp, how, Lasp, nudE, cher, up, Zasp52, CG10939, btz, Cam, SCAR, sals, egl, Map205, tmod, shot, tws, hts, Unc-89, Cip4, sgg, Tm2, by, chic, ens, 14-3-3zeta, wupA, Prm, chb, Mtor, alpha-Cat, Actn, LamC, tacc, Fmr1, sqd, Pkn, pnut, mbt, if, Pax, Dlic, cno, bt, Ubc6, CG6867, CG13366, cib, Cdc5, Svil, Rbsn-5, Vinc, Mtl, S6k, rhea, mask, S…
Gut	I	instar larval or pupal development	TRUE	2	GO:0002165	instar larval or pupal development	BP	140	62	42	1.5	0.57	0.00011	0.0022	scu, dlg1, Ude, Eip63F-1, CG9512, mtd, CG7860, Fas3, larp, how, Nrg, bol, CG10939, dally, Cam, Fas2, egl, eEF1gamma, CG43427, tmod, shot, cmb, Cip4, sgg, by, chic, MYPT-75D, Akap200, Dys, AstC, AGO2, SF1, Eip63E, bel, EloB, Paics, bif, Pkn, if, Ras85D, Rab7, woc, CG13366, Got1, cib, NAT1, Ect3, polybromo, Rbsn-5, Mtl, rhea, Mdh2, Strica, osa, Gprk1, Pcyt1, mew, RhoGEF2, hyd, blp, CG12163, zip	Col4a1, cher, Pkg21D, RpS8, Mical
Gut	I	cell morphogenesis involved in neuron differentiation	TRUE	2	GO:0048667	cell morphogenesis involved in neuron differentiation	BP	92	45	28	1.6	0.68	0.00011	0.0022	Glt, Tig, Fas3, nudE, cher, Tm1, Nrg, dnc, fax, dally, for, Cam, Fas2, SCAR, trol, shot, frac, hts, Ptp69D, Pka-R2, chic, Hrb27C, BuGZ, Fas1, shg, ras, dock, chb, PlexA, CG9705, bif, Fmr1, if, Ras85D, Dlic, eIF2beta, Taf4, CG6867, Nedd4, mfas, S6k, nudC, mew, RhoGEF2, Mical	LanB1, sgg, Rap1
Gut	I	cytoplasm organization	TRUE	1	GO:0007028	cytoplasm organization	BP	25	17	7.6	2.2	1.2	0.00011	0.0022	Yp1, Yp2, Lasp, Tm1, btz, glo, lost, tud, chic, Hrb27C, Yp3, sqd, Nacalpha, exu, SmD3, Rbsn-5, DCP1
Gut	I	cell maturation	TRUE	1	GO:0048469	cell maturation	BP	55	30	17	1.8	0.84	0.00014	0.0026	tral, Lasp, Tm1, btz, glo, Fas2, lost, egl, tud, par-6, Syp, chic, 14-3-3zeta, Hrb27C, Imp, shg, chb, Fmr1, sqd, Ras85D, shep, Stam, Nacalpha, exu, SmD3, Rbsn-5, asun, lic, DCP1, Mical
Gut	I	cellular component assembly	TRUE	1	GO:0022607	cellular component assembly	BP	210	87	63	1.4	0.46	0.00015	0.0027	Zasp66, sls, cact, dlg1, Mlc2, Lac, LanB1, Mf, l(2)efl, larp, how, Lasp, eIF4B, up, Tm1, Nrg, Zasp52, btz, glo, Nlp, Cam, Fas2, SCAR, sals, lost, Cont, tmod, shot, tws, lap, hts, Unc-89, Cip4, tud, sgg, par-6, Tm2, Syp, chic, ens, Hrb27C, wupA, vari, Prm, Imp, shg, chb, CG17683, Mtor, AGO2, SF2, Rap1, Actn, LamC, Fmr1, sqd, Nph, pnut, if, Pax, Rbp1-like, bt, eIF2beta, Nacalpha, IscU, CG6867, CG13…
Gut	I	cell junction	TRUE	1	GO:0030054	cell junction	CC	51	28	16	1.8	0.85	0.0002	0.0036	dlg1, CAP, Lac, Fas3, Lasp, Nrg, Zasp52, Swip-1, Cont, shot, par-6, by, vari, shg, alpha-Cat, Actn, mbt, if, Pax, bbg, cno, Vinc, rhea, kune, mew, Tsf2, LRR, zip
Gut	I	actin cytoskeleton organization	TRUE	2	GO:0030036	actin cytoskeleton organization	BP	89	43	27	1.6	0.66	0.00022	0.0038	Zasp66, CG5023, sls, CAP, Mlc2, tral, Mf, l(2)efl, how, Lasp, cher, up, Zasp52, CG10939, SCAR, sals, tmod, shot, hts, Unc-89, Cip4, Tm2, chic, wupA, Prm, Actn, LamC, Pkn, pnut, if, bt, CG6867, CG13366, cib, Mtl, S6k, rhea, Slik, cindr, mew, RhoGEF2, Mical, zip	Cam
Gut	I	motor neuron axon guidance	TRUE	1	GO:0008045	motor neuron axon guidance	BP	12	10	3.7	2.7	1.4	0.00023	0.0038	Glt, cher, Nrg, dally, for, Fas2, trol, Ptp69D, PlexA, CG6867
Gut	I	focal adhesion	TRUE	1	GO:0005925	focal adhesion	CC	12	10	3.7	2.7	1.4	0.00023	0.0038	CAP, Lasp, Zasp52, by, Actn, if, Pax, Vinc, rhea, mew
Gut	I	axis specification	TRUE	1	GO:0009798	axis specification	BP	49	27	15	1.8	0.85	0.00024	0.0039	cact, tral, Lasp, Tm1, btz, glo, lost, egl, tud, par-6, Syp, chic, 14-3-3zeta, Hrb27C, lig, shg, Fmr1, sqd, Ras85D, Nacalpha, exu, SmD3, Rbsn-5, asun, lic, DCP1, zip
Gut	I	plasma membrane	TRUE	1	GO:0005886	plasma membrane	CC	170	73	52	1.4	0.49	0.00025	0.0039	w, ZnT35C, Amph, nrv3, st, Adi1, dlg1, l(2)01289, Flo2, Eip63F-1, Lac, CG42258, Fas3, MSBP, CG5080, Nrg, Zasp52, fax, dally, for, Cam, Fas2, Swip-1, Cont, Nep2, nrm, Tsf1, hts, Cip4, Ptp69D, par-6, Pka-R2, 14-3-3zeta, Dyb, Akap200, vari, Dys, Fas1, shg, Snap24, alpha-Cat, CG8888, ine, Flo1, Eip63E, Rap1, PlexA, norpA, Ace, pnut, mgl, mbt, if, Ras85D, Esyt2, Rab7, VhaAC45, ZnT63C, Eno, Nedd4, Vha6…
Gut	I	oocyte axis specification	TRUE	4	GO:0007309	oocyte axis specification	BP	42	24	13	1.9	0.91	0.00026	0.0039	tral, Lasp, Tm1, btz, glo, lost, egl, tud, par-6, Syp, chic, 14-3-3zeta, Hrb27C, shg, Fmr1, sqd, Ras85D, Nacalpha, exu, SmD3, Rbsn-5, asun, lic, DCP1	chb, nudE, hts, pAbp
Gut	I	extracellular region part	TRUE	1	GO:0044421	extracellular region part	CC	90	43	27	1.6	0.65	0.00031	0.0045	Col4a1, PPO2, Galk, vkg, Ms, CG34462, apolpp, Glt, Tig, LanB1, sNPF, cher, CG17919, Tk, dally, Nplp2, nec, Ccp84Ag, Cpr64Ab, Acp65Aa, Nep2, trol, Idgf6, hts, Ppn, sgg, 14-3-3zeta, Cpr49Aa, CG17271, AstC, CG2852, Lcp65Ag1, chb, CG4847, CG10353, pnut, Spn42Dc, CG6867, Spn42Dd, mfas, cindr, Lcp65Ag3, Cpr65Au
Gut	I	response to external stimulus	TRUE	1	GO:0009605	response to external stimulus	BP	180	75	55	1.4	0.46	0.00042	0.0061	w, Pp1alpha-96A, PPO2, nrv3, cact, endos, dlg1, Glt, mtd, Tig, LanB1, EbpIII, Fas3, cher, Nrg, CG17919, NPF, nonA, dally, nec, for, Cam, Fas2, Tpi, SCAR, SNF4Agamma, Obp99c, trol, jbug, shot, slgA, lap, Tsf1, hts, Ptp69D, sgg, Pka-R2, chic, Hrb27C, CG8963, Yp3, vir-1, Rm62, Imp, Fas1, shg, ras, dock, CG7408, CG32795, chb, AGO2, nocte, PlexA, norpA, bif, Fmr1, Ace, if, Ras85D, DPCoAC, shep, eIF2be…
Gut	I	spindle	TRUE	1	GO:0005819	spindle	CC	27	17	8.2	2.1	1	0.00045	0.0063	CLIP-190, Lam, nudE, Cp190, Cam, Map205, shot, sgg, Gyf, Wdr62, chb, Mtor, tacc, Slik, Clc, Klp10A, Nup153
Gut	I	behavior	TRUE	1	GO:0007610	behavior	BP	110	50	34	1.5	0.58	0.00045	0.0063	w, qsm, Ms, dlg1, numb, CG1910, sNPF, EbpIII, Lam, Fas3, Spn, cher, Nrg, dnc, NPF, CG10939, nonA, Tk, Bacc, Scamp, for, Fas2, t, Rtnl1, Sap47, gw, slgA, Tsf1, hts, sgg, CRMP, Pka-R2, ens, 14-3-3zeta, lig, CG8963, wupA, Akap200, Obp56d, SF1, aru, Actn, norpA, Paics, Fmr1, sbr, shep, Dyrk2, S6k, Shmt
Gut	I	generation of neurons	TRUE	1	GO:0048699	generation of neurons	BP	170	73	53	1.4	0.46	0.00049	0.0065	Amph, dlg1, numb, Glt, Tig, Fas3, CG7834, nudE, cher, Tm1, Nrg, dnc, fax, dally, for, Cam, Fas2, SCAR, axo, trol, nrm, shot, tws, frac, cmb, hts, Cip4, Ptp69D, par-6, Pka-R2, chic, 14-3-3zeta, Hrb27C, BuGZ, Imp, Fas1, shg, ras, Mkk4, dock, chb, Rap1, PlexA, CG9705, bif, Fmr1, pAbp, mbt, if, Ras85D, Dlic, shep, Stam, CG4829, eIF2beta, Taf4, CG6867, Nedd4, SmD3, mfas, Rbsn-5, Vinc, Mtl, S6k, nudC, …
Gut	I	cellular localization	TRUE	1	GO:0051641	cellular localization	BP	220	88	66	1.3	0.41	0.00049	0.0065	Amph, cact, dlg1, numb, tral, Lam, exd, larp, Lasp, nudE, GCC185, LTV1, Tm1, Lsd-1, CG3529, Cp190, Vps26, btz, Scamp, glo, lqf, Cam, lost, egl, wrd, Golgin245, koi, lap, Cip4, tud, sgg, CRMP, by, chic, ens, Hrb27C, Pex14, Dys, Acn, Clbn, chb, Mtor, AGO2, Roe1, Snap24, alpha-Cat, Actn, LamC, tacc, Fmr1, sqd, sbr, Ras85D, Pax, Dlic, Esyt2, cno, Rab7, Stam, Nacalpha, exu, Madm, SmD3, Rbsn-5, Vinc, a…
Gut	I	regulation of cell development	TRUE	1	GO:0060284	regulation of cell development	BP	56	29	17	1.7	0.76	0.00058	0.0076	dlg1, numb, CG7834, Lasp, nudE, Fas2, sals, shot, tws, Tm2, chic, Hrb27C, Imp, PlexA, norpA, bif, Fmr1, pAbp, mbt, Ras85D, Dlic, Nacalpha, exu, nudC, CG5214, Strica, osa, RhoGEF2, Mical
Gut	I	epithelial tube morphogenesis	TRUE	2	GO:0060562	epithelial tube morphogenesis	BP	100	46	31	1.5	0.58	0.00073	0.0093	vkg, dlg1, mtd, LanB1, Lam, Fas3, how, Nrg, bol, CG10939, dally, Fas2, CG43427, tmod, shot, cmb, Cip4, sgg, par-6, by, chic, MYPT-75D, Dys, wal, shg, SF1, EloB, Paics, bif, Pkn, if, Ras85D, CG13366, Got1, polybromo, Rbsn-5, Mtl, rhea, osa, Gprk1, Pcyt1, mew, RhoGEF2, hyd, Nsf2, zip	Col4a1
Gut	I	regulation of mRNA 3'-end processing	TRUE	3	GO:0031440	regulation of mRNA 3'-end processing	BP	6	6	1.8	3.3	1.7	0.00079	0.0096	elav, SF2, Rbp1-like, B52, Rsf1, swm	Rrp6, sbr, asun, IntS12
Gut	I	striated muscle thin filament	TRUE	2	GO:0005865	striated muscle thin filament	CC	6	6	1.8	3.3	1.7	0.00079	0.0096	up, Tm1, sals, Tm2, wupA, Chd64	sls, Prm
Gut	I	neuron differentiation	TRUE	1	GO:0030182	neuron differentiation	BP	160	67	49	1.4	0.46	0.0009	0.011	Amph, Glt, Tig, Fas3, nudE, cher, Tm1, Nrg, dnc, fax, dally, for, Cam, Fas2, SCAR, axo, trol, nrm, shot, frac, cmb, hts, Cip4, Ptp69D, Pka-R2, chic, 14-3-3zeta, Hrb27C, BuGZ, Imp, Fas1, shg, ras, Mkk4, dock, chb, Rap1, PlexA, CG9705, bif, Fmr1, pAbp, mbt, if, Ras85D, Dlic, shep, Stam, CG4829, eIF2beta, Taf4, CG6867, Nedd4, SmD3, mfas, Rbsn-5, Vinc, Mtl, S6k, nudC, osa, mask, sw, mew, RhoGEF2, Mic…
Gut	I	morphogenesis of an epithelium	TRUE	2	GO:0002009	morphogenesis of an epithelium	BP	130	56	40	1.4	0.5	0.0011	0.013	Col4a1, vkg, dlg1, mtd, Lac, LanB1, Lam, Fas3, how, cher, Nrg, bol, CG10939, dally, Fas2, CG43427, jbug, tmod, shot, cmb, Cip4, sgg, par-6, by, chic, MYPT-75D, lig, Akap200, Dys, wal, shg, SF1, Eip63E, Rap1, EloB, Paics, bif, sqd, Pkn, if, Ras85D, cno, CG13366, Got1, polybromo, Rbsn-5, Mtl, rhea, osa, Gprk1, Pcyt1, mew, RhoGEF2, hyd, Nsf2, zip	LamC
Gut	I	gland morphogenesis	TRUE	5	GO:0022612	gland morphogenesis	BP	38	21	12	1.8	0.86	0.0011	0.013	Eip63F-1, CG7860, larp, Cam, egl, eEF1gamma, chic, Akap200, shg, AGO2, bel, if, Rab7, NAT1, Ect3, Mtl, Mdh2, Strica, mew, CG12163, zip	exd, cher, RpS8, SmD3
Gut	I	imaginal disc morphogenesis	TRUE	3	GO:0007560	imaginal disc morphogenesis	BP	84	39	26	1.5	0.61	0.0012	0.013	dlg1, mtd, Fas3, how, Nrg, bol, CG10939, dally, Fas2, CG43427, tmod, shot, cmb, Cip4, sgg, by, chic, MYPT-75D, Dys, SF1, EloB, Paics, bif, Pkn, if, Ras85D, CG13366, Got1, polybromo, Rbsn-5, Mtl, rhea, osa, Gprk1, Pcyt1, mew, RhoGEF2, hyd, zip	cher, Pkg21D, RpS8, Mical
Gut	I	muscle contraction	TRUE	2	GO:0006936	muscle contraction	BP	8	7	2.4	2.9	1.5	0.0014	0.016	Amph, Ms, up, Tm1, Mlc1, Chd64, zip	Mlc2, Lasp
Gut	I	movement of cell or subcellular component	TRUE	1	GO:0006928	movement of cell or subcellular component	BP	130	55	39	1.4	0.48	0.0016	0.018	CAP, numb, Glt, Tig, LanB1, Fas3, how, nudE, cher, Nrg, dally, for, Cam, Fas2, SCAR, trol, shot, hts, Ptp69D, par-6, Pka-R2, chic, ens, Hrb27C, Fas1, shg, ras, dock, chb, Rap1, PlexA, bif, Fmr1, sqd, if, Ras85D, Dlic, bbg, Rab7, Stam, eIF2beta, CG6867, Nedd4, Mtl, S6k, rhea, sw, Miro, cindr, Dlc90F, mew, RhoGEF2, Klp10A, Mical, zip
Gut	I	cellular process involved in reproduction in multicellular organism	TRUE	1	GO:0022412	cellular process involved in reproduction in multicellular organism	BP	190	77	59	1.3	0.4	0.0017	0.018	Yp1, Yp2, cact, endos, dlg1, yps, eIF4G1, tral, Pdcd4, Fas3, how, Lasp, nudE, cher, Tm1, rngo, dnc, bol, dally, btz, glo, SCAR, lost, egl, hts, Cip4, tud, sgg, par-6, Syp, chic, 14-3-3zeta, Hrb27C, lig, Yp3, shg, ras, chb, AGO2, alpha-Cat, twin, bel, Rap1, CG7470, tacc, Fmr1, sqd, pAbp, if, Ras85D, Pax, Dlic, bbg, Rab7, mod, Nacalpha, exu, Rab4, SmD3, polybromo, Rbsn-5, S6k, asun, rhea, nudC, Str…
Gut	I	regulation of cell size	TRUE	1	GO:0008361	regulation of cell size	BP	16	11	4.9	2.3	1.2	0.0017	0.018	sNPF, LTV1, SCAR, shot, bif, mbt, Ras85D, MAPk-Ak2, Madm, S6k, lic
Gut	I	cytoskeleton	TRUE	1	GO:0005856	cytoskeleton	CC	200	79	60	1.3	0.39	0.0018	0.018	Yp1, Yp2, scu, sls, CLIP-190, eEF1alpha1, dlg1, Mlc2, tral, apolpp, ClC-a, CG34417, Lam, eIF4H1, CG7834, Lasp, nudE, cher, up, Tm1, Mlc1, Zasp52, CG6543, Cp190, Cam, SCAR, sals, eEF1gamma, Map205, shot, tws, hts, sgg, Tm2, ens, 14-3-3zeta, FK506-bp1, sta, Gyf, Wdr62, wupA, Dys, Yp3, Pep, Rm62, Prm, CG2852, chb, Mtor, CG10932, alpha-Cat, bel, EloB, LamC, tacc, CG12512, pnut, pAbp, SMC2, Pax, Dlic,…
Gut	I	regulation of multicellular organismal development	TRUE	1	GO:2000026	regulation of multicellular organismal development	BP	110	48	34	1.4	0.52	0.0018	0.018	dlg1, numb, CG7834, how, Lasp, nudE, cher, dally, lqf, Fas2, shot, tws, Capr, Cip4, sgg, chic, Hrb27C, lig, Mccc2, Akap200, Yp3, Imp, Mkk4, Rap1, PlexA, norpA, bif, Fmr1, pAbp, mgl, mbt, Ras85D, Dlic, cno, Mlp60A, Stam, Nacalpha, Nedd4, exu, Mtl, nudC, CG5214, Strica, osa, lic, RhoGEF2, Nsf2, Mical
Gut	I	cytoplasmic ribonucleoprotein granule	TRUE	2	GO:0036464	cytoplasmic ribonucleoprotein granule	CC	14	10	4.3	2.3	1.2	0.0018	0.018	tral, gw, tud, Hrb27C, lig, Yp3, bel, Fmr1, exu, DCP1	Syp
Gut	I	regulation of developmental process	TRUE	1	GO:0050793	regulation of developmental process	BP	160	65	48	1.3	0.43	0.0019	0.019	sls, dlg1, numb, Pdcd4, sNPF, Mp20, exd, CG7834, how, Lasp, nudE, cher, dally, lqf, Fas2, SCAR, sals, shot, tws, Capr, Cip4, sgg, par-6, Tm2, chic, Hrb27C, lig, Mccc2, Akap200, Yp3, Imp, Mkk4, Rap1, PlexA, norpA, bif, Fmr1, pAbp, mgl, mbt, if, Ras85D, Pax, Dlic, cno, Mlp60A, Stam, Nacalpha, Nedd4, exu, CG8939, MAPk-Ak2, mfas, Mtl, S6k, rhea, nudC, CG5214, Strica, osa, lic, RhoGEF2, Nsf2, Mical, z…
Gut	I	adult behavior	TRUE	1	GO:0030534	adult behavior	BP	32	18	9.8	1.8	0.88	0.002	0.019	Ms, dlg1, sNPF, Lam, cher, dnc, Tk, Bacc, Fas2, t, Pka-R2, wupA, Akap200, Actn, norpA, sbr, shep, Shmt
Gut	I	olfactory behavior	TRUE	2	GO:0042048	olfactory behavior	BP	25	15	7.6	2	0.98	0.002	0.019	Fas3, Spn, cher, dnc, CG10939, Fas2, Rtnl1, Tsf1, sgg, 14-3-3zeta, CG8963, Obp56d, aru, Fmr1, Dyrk2
Gut	I	cell adhesion	TRUE	2	GO:0007155	cell adhesion	BP	57	28	17	1.6	0.69	0.0021	0.02	dlg1, CAP, Flo2, Lac, Tig, LanB1, Mp20, Fas3, how, Nrg, Fas2, SCAR, Cont, nrm, par-6, Fas1, shg, alpha-Cat, Rap1, mbt, if, Pax, CG6867, MAPk-Ak2, Rab4, Vinc, rhea, mew
Gut	I	protein-containing complex binding	TRUE	1	GO:0044877	protein-containing complex binding	MF	47	24	14	1.7	0.74	0.0022	0.021	Tig, cher, Tm1, rngo, Cp190, sals, Ubqn, sta, dock, Mtor, alpha-Cat, Actn, bif, SMC2, Rab7, woc, pzg, Svil, polybromo, Vinc, rhea, sw, Nup153, BEAF-32
Gut	I	cytosol	TRUE	1	GO:0005829	cytosol	CC	180	74	56	1.3	0.39	0.0023	0.021	CG14207, scu, eEF1alpha1, Flo2, eIF4G1, iPLA2-VIA, tral, HIP-R, Pdcd4, Fas3, larp, eIF4H1, Lasp, eIF4B, cher, LTV1, Tm1, rngo, Mlc1, for, Cam, ps, Fas2, lost, RpLP2, t, eEF1gamma, Rtnl1, eEF1beta, Ubqn, trol, tws, Capr, sgg, Ald, sta, vig, AMPdeam, RpLP1, AGO2, twin, Eip63E, bel, Mdh1, Paics, Pkn, pAbp, mgl, Pax, RpS8, shep, Dyrk2, Usp10, eIF2beta, CG7675, Eno, Got1, cib, RpS30, Madm, S6k, nudC, …
Gut	I	neuron recognition	TRUE	2	GO:0008038	neuron recognition	BP	30	17	9.2	1.9	0.89	0.0024	0.021	Glt, Fas3, Fas2, SCAR, axo, trol, nrm, shot, Ptp69D, Fas1, PlexA, Fmr1, if, eIF2beta, CG6867, Nedd4, mew
Gut	I	DNA-templated transcriptional start site selection	TRUE	6	GO:0001173	DNA-templated transcriptional start site selection	BP	5	5	1.5	3.3	1.7	0.0026	0.022	SF2, Rbp1-like, B52, Rsf1, TfIIB	TfIIA-L, Taf4, TfIIFbeta
Gut	I	homophilic cell adhesion via plasma membrane adhesion molecules	TRUE	2	GO:0007156	homophilic cell adhesion via plasma membrane adhesion molecules	BP	5	5	1.5	3.3	1.7	0.0026	0.022	Lac, Fas3, Fas2, Fas1, shg	if, mew
Gut	I	cell-cell adherens junction	TRUE	1	GO:0005913	cell-cell adherens junction	CC	5	5	1.5	3.3	1.7	0.0026	0.022	Zasp52, shg, alpha-Cat, mbt, cno
Gut	I	single-stranded RNA binding	TRUE	1	GO:0003727	single-stranded RNA binding	MF	5	5	1.5	3.3	1.7	0.0026	0.022	how, nonA, elav, Pep, pAbp
Gut	I	blastoderm segmentation	TRUE	3	GO:0007350	blastoderm segmentation	BP	35	19	11	1.8	0.83	0.0026	0.022	Lasp, Tm1, btz, glo, lost, tud, sgg, chic, Hrb27C, shg, AGO2, sqd, Ras85D, Nacalpha, exu, SmD3, Rbsn-5, lic, DCP1	osa
Gut	I	pole plasm RNA localization	TRUE	14	GO:0007316	pole plasm RNA localization	BP	21	13	6.4	2	1	0.0027	0.022	Lasp, Tm1, btz, glo, lost, chic, Hrb27C, sqd, Nacalpha, exu, SmD3, Rbsn-5, DCP1	tud, shg, Ras85D, lic, egl
Gut	I	cell-cell adhesion	TRUE	1	GO:0098609	cell-cell adhesion	BP	21	13	6.4	2	1	0.0027	0.022	dlg1, Lac, Fas3, Nrg, Fas2, Fas1, shg, Rap1, mbt, if, Rab4, rhea, mew
Gut	I	regulation of translation	TRUE	3	GO:0006417	regulation of translation	BP	33	18	10	1.8	0.84	0.0031	0.025	l(2)efl, Rga, how, bol, glo, UK114, gw, Syp, Hrb27C, Not3, AGO2, twin, Fmr1, sqd, pAbp, CG7414, Irp-1B, DCP1	vig, Rm62, bel, cact, Ntf-2
Gut	I	imaginal disc development	TRUE	1	GO:0007444	imaginal disc development	BP	140	56	41	1.4	0.44	0.0032	0.025	dlg1, mtd, Mf, Irk3, exd, Fas3, Idgf4, how, CG30069, Nrg, bol, CG10939, dally, Fas2, CG43427, tmod, shot, tws, Idgf6, cmb, Capr, Cip4, sgg, by, chic, MYPT-75D, lig, Dys, SF1, EloB, Paics, bif, Fmr1, Pkn, if, Ras85D, Pax, holn1, bbg, Rab7, CG13366, Got1, polybromo, Rbsn-5, Mtl, rhea, osa, ppl, Gprk1, Pcyt1, mew, RhoGEF2, hyd, Snx3, CG12163, zip
Gut	I	oogenesis	TRUE	2	GO:0048477	oogenesis	BP	160	65	49	1.3	0.41	0.0033	0.026	Yp2, cact, endos, dlg1, yps, tral, Pdcd4, Fas3, Lasp, nudE, cher, Tm1, rngo, dnc, dally, btz, glo, SCAR, lost, egl, hts, Cip4, tud, sgg, par-6, Syp, chic, 14-3-3zeta, Hrb27C, lig, shg, ras, chb, alpha-Cat, twin, bel, Rap1, CG7470, Fmr1, sqd, pAbp, if, Ras85D, Pax, Dlic, bbg, Rab7, Nacalpha, exu, Rab4, SmD3, polybromo, Rbsn-5, S6k, asun, rhea, nudC, Strica, lic, DCP1, lqfR, cindr, Pcyt1, BEAF-32, …	Yp1, Yp3
Gut	I	neuron projection morphogenesis	TRUE	4	GO:0048812	neuron projection morphogenesis	BP	110	47	34	1.4	0.49	0.0034	0.026	Glt, Tig, Fas3, nudE, cher, Tm1, Nrg, dnc, fax, dally, for, Cam, Fas2, SCAR, trol, shot, frac, hts, Ptp69D, Pka-R2, chic, Hrb27C, BuGZ, Fas1, shg, ras, Mkk4, dock, chb, PlexA, CG9705, bif, Fmr1, if, Dlic, CG4829, eIF2beta, Taf4, CG6867, Nedd4, mfas, Vinc, S6k, nudC, mew, RhoGEF2, Mical	Imp, LRR
Gut	I	memory	TRUE	3	GO:0007613	memory	BP	17	11	5.2	2.1	1.1	0.0036	0.027	w, CG1910, cher, dnc, Scamp, for, Fas2, CRMP, aru, Fmr1, sbr	Fas3, Sap47, sgg, 14-3-3zeta
Gut	I	mitotic spindle	TRUE	1	GO:0072686	mitotic spindle	CC	15	10	4.6	2.2	1.1	0.004	0.029	Lam, Cam, sgg, Gyf, Wdr62, Mtor, Slik, Clc, Klp10A, Nup153
Gut	I	apical junction complex	TRUE	2	GO:0043296	apical junction complex	CC	24	14	7.3	1.9	0.94	0.004	0.029	dlg1, Lac, Fas3, Nrg, Zasp52, Cont, par-6, vari, shg, alpha-Cat, bbg, cno, kune, Tsf2	mbt, zip
Gut	I	imaginal disc-derived wing morphogenesis	TRUE	7	GO:0007476	imaginal disc-derived wing morphogenesis	BP	67	31	20	1.5	0.6	0.004	0.029	mtd, Fas3, how, bol, CG10939, dally, CG43427, tmod, shot, cmb, Cip4, sgg, by, MYPT-75D, Dys, SF1, EloB, Paics, bif, if, Ras85D, Got1, Rbsn-5, Mtl, rhea, osa, Gprk1, Pcyt1, mew, RhoGEF2, zip	Pkn, CG13366, polybromo
Gut	I	mRNA catabolic process	TRUE	4	GO:0006402	mRNA catabolic process	BP	7	6	2.1	2.8	1.5	0.0041	0.029	Rga, gw, Not3, twin, sqd, DCP1	Rrp6, UK114, Hrb27C, AGO2, Fmr1
Gut	I	spindle pole	TRUE	2	GO:0000922	spindle pole	CC	7	6	2.1	2.8	1.5	0.0041	0.029	nudE, Cam, Wdr62, chb, tacc, Klp10A	Mtor, CG10932, Slik
Gut	I	hormone activity	TRUE	5	GO:0005179	hormone activity	MF	7	6	2.1	2.8	1.5	0.0041	0.029	Ms, sNPF, NPF, Tk, Nplp2, AstC	Cam, CG10359, norpA, Gprk1
Gut	I	phosphatase binding	TRUE	3	GO:0019902	phosphatase binding	MF	7	6	2.1	2.8	1.5	0.0041	0.029	Zasp66, I-2, Spn, Nop17l, MYPT-75D, bif
Gut	I	regulation of multicellular organismal process	TRUE	1	GO:0051239	regulation of multicellular organismal process	BP	140	59	44	1.3	0.42	0.0042	0.029	Amph, sls, Ms, dlg1, numb, sNPF, CG7834, how, Lasp, nudE, cher, up, Tk, dally, lqf, for, Fas2, shot, tws, Capr, Cip4, sgg, chic, Hrb27C, lig, Mccc2, Akap200, Yp3, AstC, Imp, Mkk4, Rap1, PlexA, norpA, bif, Fmr1, pAbp, mgl, mbt, Ras85D, Dlic, cno, Mlp60A, Stam, Nacalpha, Nedd4, exu, CG8939, mfas, Mtl, S6k, nudC, CG5214, Strica, osa, lic, RhoGEF2, Nsf2, Mical
Gut	I	actin filament binding	TRUE	1	GO:0051015	actin filament binding	MF	13	9	4	2.3	1.2	0.0044	0.03	cher, Tm1, sals, alpha-Cat, Actn, bif, Svil, Vinc, rhea
Gut	I	regulation of response to stimulus	TRUE	1	GO:0048583	regulation of response to stimulus	BP	190	74	58	1.3	0.36	0.0045	0.03	Pp1alpha-96A, I-2, cact, numb, iPLA2-VIA, mtd, LanB1, sNPF, Lam, Rtf1, eIF4B, dnc, NPF, dally, glo, nec, lqf, for, Cam, Fas2, SNF4Agamma, trol, Unc-89, sgg, CRMP, chic, 14-3-3zeta, lig, Akap200, Rm62, Imp, Mkk4, dock, CG32795, Clbn, chb, gfzf, ine, CG14812, PlexA, norpA, Fmr1, Pkn, mbt, Ras85D, DPCoAC, holn1, Usp10, cno, Rab7, Stam, pzg, Nedd4, Vha68-1, MAPk-Ak2, Spn42Dd, Mtl, S6k, GILT1, Cdep, s…
Gut	I	extracellular matrix	TRUE	1	GO:0031012	extracellular matrix	CC	29	16	8.8	1.8	0.86	0.0046	0.03	Col4a1, vkg, CG34462, Glt, Tig, LanB1, dally, Ccp84Ag, Cpr64Ab, Acp65Aa, trol, Ppn, Cpr49Aa, Lcp65Ag1, Lcp65Ag3, Cpr65Au
Gut	I	cytoskeletal anchoring at plasma membrane	TRUE	4	GO:0007016	cytoskeletal anchoring at plasma membrane	BP	9	7	2.7	2.5	1.4	0.0046	0.03	by, alpha-Cat, Actn, Pax, Vinc, rhea, mask	cact, chic, zip, if
Gut	I	spindle microtubule	TRUE	4	GO:0005876	spindle microtubule	CC	9	7	2.7	2.5	1.4	0.0046	0.03	CLIP-190, Cp190, Map205, shot, chb, tacc, Klp10A	apolpp, nudE, ens, bif, pnut
Gut	I	autophagic cell death	TRUE	5	GO:0048102	autophagic cell death	BP	22	13	6.7	1.9	0.95	0.0048	0.031	Eip63F-1, CG7860, larp, Cam, eEF1gamma, Akap200, AGO2, bel, Rab7, NAT1, Ect3, Mdh2, CG12163	norpA, Ras85D, Strica
Gut	I	protein serine/threonine kinase activity	TRUE	3	GO:0004674	protein serine/threonine kinase activity	MF	34	18	10	1.7	0.8	0.0048	0.031	sls, for, SNF4Agamma, CG43143, Pkg21D, sgg, Mkk4, Eip63E, Pkn, mbt, Dyrk2, bt, MAPk-Ak2, Madm, S6k, lic, Slik, Gprk1	Pdk, Galk, CG5828, Hex-C, Pdxk
Gut	I	regulation of RNA biosynthetic process	TRUE	3	GO:2001141	regulation of RNA biosynthetic process	BP	76	34	23	1.5	0.55	0.0052	0.033	yps, Lam, exd, Rtf1, Rga, Cp190, dally, sgg, lig, Not3, CG12384, Mtor, AGO2, twin, SF2, CG9705, LamC, TfIIS, Ras85D, TfIIA-L, Rbp1-like, woc, Taf4, CG8578, B52, Rsf1, polybromo, rhea, osa, TfIIB, CG17202, Nup153, BEAF-32, TfIIFbeta
Gut	I	tube development	TRUE	1	GO:0035295	tube development	BP	160	65	50	1.3	0.38	0.0056	0.035	Col4a1, vkg, dlg1, numb, mtd, LanB1, Mf, Irk3, Lam, exd, Fas3, Idgf4, how, CG30069, Nrg, bol, CG10939, dally, Fas2, CG43427, tmod, shot, tws, Idgf6, cmb, Capr, Cip4, sgg, par-6, by, chic, MYPT-75D, lig, Dys, wal, shg, SF1, EloB, Paics, bif, Fmr1, Pkn, if, Ras85D, Pax, holn1, bbg, Rab7, CG13366, Got1, polybromo, Rbsn-5, Mtl, rhea, osa, ppl, Gprk1, Pcyt1, mew, RhoGEF2, hyd, Nsf2, Snx3, CG12163, zip
Gut	I	cell projection organization	TRUE	1	GO:0030030	cell projection organization	BP	140	56	42	1.3	0.41	0.0056	0.035	Glt, Tig, Fas3, nudE, cher, Tm1, Nrg, dnc, fax, dally, for, Cam, Fas2, SCAR, trol, shot, frac, cmb, hts, Cip4, Ptp69D, par-6, Pka-R2, chic, Hrb27C, BuGZ, Imp, Fas1, shg, ras, Mkk4, dock, chb, Rap1, PlexA, CG9705, bif, Fmr1, if, Dlic, CG4829, eIF2beta, Taf4, CG6867, Nedd4, mfas, Rbsn-5, Vinc, Mtl, S6k, nudC, mew, RhoGEF2, Mical, LRR, zip
Gut	I	mesoderm development	TRUE	1	GO:0007498	mesoderm development	BP	20	12	6.1	2	0.98	0.0057	0.035	Zasp66, sls, CG34417, how, up, Mlc1, Swip-1, Cip4, Ald, Prm, shg, bt
Gut	I	chromosome organization	TRUE	1	GO:0051276	chromosome organization	BP	37	19	11	1.7	0.75	0.0059	0.036	sls, larp, nudE, Cp190, glo, Nlp, Cam, tws, sgg, chic, chb, Mtor, bel, Fmr1, SMC2, woc, pzg, Slik, Klp10A
Gut	I	embryo development	TRUE	1	GO:0009790	embryo development	BP	110	47	34	1.4	0.45	0.0063	0.038	Col4a1, vkg, dlg1, numb, Lac, LanB1, larp, how, Lasp, Tm1, Cp190, btz, glo, lost, gw, tws, Capr, tud, sgg, par-6, chic, 14-3-3zeta, Hrb27C, Yp3, wal, shg, chb, AGO2, Eip63E, Rap1, Fmr1, sqd, Pkn, if, Ras85D, cno, Nacalpha, exu, SmD3, Rbsn-5, Mtl, rhea, lic, DCP1, RhoGEF2, blp, zip
Gut	I	regionalization	TRUE	2	GO:0003002	regionalization	BP	88	38	27	1.4	0.5	0.0066	0.04	cact, numb, tral, exd, Lasp, Tm1, dally, btz, glo, lost, egl, tws, tud, sgg, Syp, chic, Hrb27C, lig, Dys, shg, AGO2, EloB, Fmr1, sqd, pAbp, Ras85D, Rab7, Nacalpha, exu, SmD3, Rbsn-5, asun, osa, lic, DCP1, Gprk1, mew, zip	par-6, 14-3-3zeta, cno
Gut	I	locomotory behavior	TRUE	1	GO:0007626	locomotory behavior	BP	45	22	14	1.6	0.68	0.0067	0.04	qsm, Ms, dlg1, Lam, dnc, NPF, Tk, Scamp, for, t, gw, slgA, hts, sgg, Pka-R2, ens, CG8963, wupA, Actn, norpA, Fmr1, shep
Gut	I	germ cell development	TRUE	1	GO:0007281	germ cell development	BP	180	70	55	1.3	0.35	0.007	0.041	Yp2, cact, endos, dlg1, yps, eIF4G1, tral, Pdcd4, Fas3, Lasp, nudE, cher, Tm1, rngo, dnc, dally, btz, glo, SCAR, lost, egl, hts, Cip4, tud, sgg, par-6, Syp, chic, 14-3-3zeta, Hrb27C, lig, shg, ras, chb, alpha-Cat, twin, bel, Rap1, CG7470, Fmr1, sqd, pAbp, if, Ras85D, Pax, Dlic, bbg, Rab7, mod, Nacalpha, exu, Rab4, SmD3, polybromo, Rbsn-5, S6k, asun, rhea, nudC, Strica, lic, DCP1, lqfR, sw, cindr,…
Gut	I	regulation of cellular component organization	TRUE	1	GO:0051128	regulation of cellular component organization	BP	160	63	49	1.3	0.37	0.0075	0.044	endos, dlg1, numb, Mp20, Rtf1, Lasp, nudE, Tm1, bol, Cp190, LKRSDH, Fas2, SCAR, sals, tmod, shot, tws, lap, Cip4, sgg, par-6, Tm2, chic, Hrb27C, Imp, chb, Mtor, SF2, Rap1, PlexA, norpA, LamC, bif, tacc, Fmr1, mgl, if, Ras85D, Pax, Dlic, Rbp1-like, cno, Nacalpha, CG6867, B52, Nedd4, exu, MAPk-Ak2, Rsf1, polybromo, Rbsn-5, Mtl, S6k, rhea, nudC, mask, Slik, DCP1, cindr, RhoGEF2, Nsf2, zip, TfIIFbeta
Gut	I	negative regulation of nitrogen compound metabolic process	TRUE	2	GO:0051172	negative regulation of nitrogen compound metabolic process	BP	43	21	13	1.6	0.68	0.0081	0.047	Lam, Rga, Cp190, UK114, gw, elav, Hrb27C, Not3, Acn, CG12384, AGO2, twin, LamC, Psi, Fmr1, sqd, Rsf1, polybromo, rhea, swm, DCP1	vig, Rm62, bel
Gut	II	cortical actin cytoskeleton	TRUE	3	GO:0030864	cortical actin cytoskeleton	CC	8	7	1.7	4.1	2	0.00013	0.038	Abp1, Eps-15, Khc, WASp, Cortactin, beta-Spec, alpha-Spec	Dap160, Patj
Gut	II	endomembrane system	TRUE	1	GO:0012505	endomembrane system	CC	220	69	48	1.4	0.53	0.00021	0.038	Psn, ALiX, Gga, Baldspot, BicD, epsilonCOP, boca, CG8042, p115, Dap160, Tango9, CG14977, GckIII, lva, deltaCOP, cer, betaCOP, Vps4, Vps36, Hrs, Sec24CD, Nup98-96, Rab6, PHGPx, nero, Syx5, tobi, Vps20, mfr, CHMP2B, hook, l(1)G0320, Vps37B, AP-2alpha, CG6488, Eps-15, CG5110, Ufl1, Vps28, Lnpk, Patj, Sara, garz, Nup358, AnxB9, wash, spas, CG9536, Cse1, Tango11, Spn42Da, Nup50, Stt3B, Hsc70-3, Vps60,…
Gut	II	endosome	TRUE	2	GO:0005768	endosome	CC	44	20	9.5	2.1	1.1	0.00029	0.038	Psn, ALiX, CG14977, Vps4, Vps36, Hrs, Vps20, CHMP2B, hook, Vps37B, CG5110, Vps28, Sara, wash, Vps60, Rab18, Pi3K68D, Syx7, Ocrl, spartin	cer, ref(2)P
Gut	II	ESCRT complex	TRUE	2	GO:0036452	ESCRT complex	CC	9	7	1.9	3.6	1.8	0.00049	0.041	Vps36, Hrs, Vps20, CHMP2B, Vps37B, Vps28, Vps60	AnxB9
Gut	II	protein transport	TRUE	2	GO:0015031	protein transport	BP	97	35	21	1.7	0.74	0.00052	0.041	Gga, boca, DCTN1-p150, p115, cora, Tango9, Su(fu), Hsp60A, mge, deltaCOP, betaCOP, Vps4, Hrs, Sec24CD, Nup98-96, Syx5, CG7394, didum, AP-2alpha, Srp14, Tim8, garz, Nup358, Khc, Cse1, Tango11, Nup50, CG34132, WASp, mbo, Tom20, Tango1, Rab1, Tim17b, Tango4	bic
Gut	III	oxidoreductase activity, acting on NAD(P)H	TRUE	1	GO:0016651	oxidoreductase activity, acting on NAD(P)H	MF	27	23	8.2	2.8	1.5	4e-09	1.2e-06	ND-B12, ND-ASHI, ND-51, ND-39, ND-SGDH, ND-B22, ND-42, ND-13B, ND-49, CG7430, ND-24, Cpr, ND-B17.2, CG5946, ND-B14.5B, ND-B16.6, ND-B17, ND-20, ND-13A, ND-B15, ND-B14, Trxr-1, CG9471
Gut	III	peptidase activity, acting on L-amino acid peptides	TRUE	2	GO:0070011	peptidase activity, acting on L-amino acid peptides	MF	99	57	30	1.9	0.93	6.2e-09	1.2e-06	CtsB1, CG18180, CG11911, DppIII, Jon99Fii, CG13630, thetaTry, epsilonTry, CG4572, 26-29-p, CG12374, CG31233, etaTry, Ser6, grsm, CG31198, CG10602, CG9953, Prosbeta2, Ance, Prosalpha4, CG5246, CG10576, CalpB, Prosalpha1, CG15255, CG17633, CG1304, Prosbeta4, goe, Prosbeta6, Drice, Prosbeta1, Usp8, CG3344, Prosbeta5, Jon65Aiv, ApepP, CG17337, twr, CSN4, UQCR-C1, Prosalpha7, Jon65Ai, CG7542, Uch, CG4…	Spase12
Gut	III	oxidoreductase activity	TRUE	1	GO:0016491	oxidoreductase activity	MF	190	91	59	1.6	0.64	1.4e-07	1.6e-05	CG17544, Ero1L, CG9743, Jafrac1, CG9527, Cyp9b2, ND-B12, CG14997, CG5167, Cyp9f2, CG11200, Acox57D-d, P5cr, CG6287, ND-ASHI, Pgd, ND-51, levy, Cyp28a5, Cyp6a13, ND-39, Gpo1, Sod2, CG9360, ND-SGDH, ND-B22, sgl, ND-42, Cyp4ad1, GstO2, Cyp6u1, Cyp6a21, ifc, Etf-QO, fa2h, Cyp6a23, Cyp4p1, l(2)37Bb, Cyp6a8, Eip71CD, Su(P), Arc42, CG6084, CG5028, ND-13B, Gpdh1, ND-49, CG7601, CG8306, Ldh, CG7430, Scox,…
Gut	III	NADH dehydrogenase (quinone) activity	TRUE	8	GO:0050136	NADH dehydrogenase (quinone) activity	MF	16	15	4.8	3.1	1.6	1.7e-07	1.6e-05	ND-ASHI, ND-51, ND-39, ND-SGDH, ND-B22, ND-42, ND-13B, ND-49, ND-24, ND-B17.2, ND-B14.5B, ND-20, ND-13A, ND-B15, ND-B14	ND-B12, ND-B16.6, ND-B17, ND-AGGG, ND-B14.7
Gut	III	respiratory chain	TRUE	6	GO:0070469	respiratory chain	CC	38	27	12	2.3	1.2	2e-07	1.6e-05	ND-B12, ND-ASHI, ND-51, levy, ND-39, ND-AGGG, ND-SGDH, ND-B22, ND-42, ND-13B, ND-B14.7, ND-49, RFeSP, ND-24, UQCR-6.4, ND-B17.2, ND-B14.5B, UQCR-C1, ND-B16.6, ND-B17, UQCR-Q, UQCR-14, ND-20, COX6B, ND-13A, ND-B15, ND-B14	ATPsynB, ATPsynF, CG9399, ttm50, CG7430, Mtpalpha
Gut	III	oxidoreductase complex	TRUE	1	GO:1990204	oxidoreductase complex	CC	43	29	13	2.2	1.2	4.1e-07	2.7e-05	ND-B12, ND-ASHI, ND-51, ND-39, Gpo1, ND-AGGG, ND-SGDH, ND-B22, ND-42, ND-13B, ND-B14.7, Gpdh1, ND-49, CG7430, RFeSP, ND-24, UQCR-6.4, ND-B17.2, ND-B14.5B, UQCR-C1, ND-B16.6, CG11876, ND-B17, UQCR-Q, UQCR-14, ND-20, ND-13A, ND-B15, ND-B14
Gut	III	oxidative phosphorylation	TRUE	6	GO:0006119	oxidative phosphorylation	BP	40	27	12	2.2	1.2	1e-06	5.6e-05	ND-B12, ND-ASHI, ND-51, levy, ND-39, ND-SGDH, ND-B22, ND-42, Suv3, Etf-QO, ND-13B, ND-49, RFeSP, ND-24, UQCR-6.4, ND-B17.2, ND-B14.5B, UQCR-C1, ND-B16.6, ND-B17, UQCR-Q, UQCR-14, ND-20, Lrpprc2, ND-B15, ND-B14, Tspo	ATPsynB, Ldh, Scox
Gut	III	carbohydrate derivative metabolic process	TRUE	1	GO:1901135	carbohydrate derivative metabolic process	BP	110	58	34	1.7	0.76	1.1e-06	5.6e-05	Ugt35b, ND-B12, Adk3, Ppat-Dpck, ATPsynB, AdenoK, CG3434, ND-ASHI, Pgd, ND-51, levy, ND-39, cN-IIIB, Gpo1, PGRP-LB, Gmd, fbl, ND-SGDH, wol, ND-B22, sgl, ND-42, PIG-S, Suv3, GAA1, Efr, CG10166, Etf-QO, r-l, ND-13B, Gpdh1, ND-49, Adgf-A, Ldh, Scox, RFeSP, ND-24, UQCR-6.4, ND-B17.2, ND-B14.5B, Mtap, UQCR-C1, Dhfr, ND-B16.6, ND-B17, PIG-T, UQCR-Q, Prat, UQCR-14, ND-20, Lrpprc2, ND-B15, Pgant4, mmy, N…
Gut	III	mitochondrial inner membrane	TRUE	4	GO:0005743	mitochondrial inner membrane	CC	73	41	22	1.9	0.89	2.5e-06	0.00011	ND-B12, ATPsynB, ND-ASHI, ND-51, levy, ND-39, Gpo1, ND-AGGG, ND-SGDH, ND-B22, Hmt-1, ND-42, Etf-QO, ATPsynF, FeCH, ND-13B, ND-B14.7, ND-49, aralar1, Scox, RFeSP, ND-24, UQCR-6.4, Ucp4A, ND-B17.2, ND-B14.5B, UQCR-C1, ND-B16.6, Cchl, ND-B17, UQCR-Q, Dhod, UQCR-14, ND-20, COX6B, ND-13A, ND-B15, ND-B14, CG9399, ttm50, colt	nmd, Tspo, Adk2
Gut	III	catalytic complex	TRUE	1	GO:1902494	catalytic complex	CC	140	68	43	1.6	0.65	4.6e-06	0.00017	CG4562, Pmp70, ND-B12, Rpt6, CG10505, ND-ASHI, ND-51, CG5853, Rpn7, ND-39, Gpo1, Prosbeta2, Prosalpha4, ND-AGGG, ND-SGDH, ND-B22, Hmt-1, ND-42, PIG-S, GAA1, Prosalpha1, san, Prosbeta4, CG5789, beta-PheRS, ND-13B, CG9663, ND-B14.7, Gpdh1, ND-49, Act5C, Prosbeta6, alpha-PheRS, Prosbeta1, CG7430, Rpn10, Prosbeta5, RFeSP, ND-24, UQCR-6.4, CG9281, ND-B17.2, Cul4, twr, ND-B14.5B, Fnta, UQCR-C1, Prosalp…
Gut	III	proteolysis	TRUE	1	GO:0006508	proteolysis	BP	140	66	42	1.6	0.66	5.1e-06	0.00017	CtsB1, CG18180, CG11911, DppIII, Jon99Fii, CG13630, Rpt6, thetaTry, epsilonTry, CG4572, 26-29-p, CG12374, CG31233, etaTry, Ser6, grsm, Rpn7, CG31198, CG10602, CG9953, Prosbeta2, Ance, Prosalpha4, CG5246, CalpB, Prosalpha1, CG15255, CG17633, CG1304, Prosbeta4, CSN1b, goe, Prosbeta6, Drice, Vps2, Prosbeta1, Usp8, CG3344, Rpn10, Prosbeta5, Jon65Aiv, ApepP, CG17337, Cul4, twr, CSN4, UQCR-C1, Prosalph…
Gut	III	endoplasmic reticulum	TRUE	1	GO:0005783	endoplasmic reticulum	CC	58	34	18	1.9	0.95	5.1e-06	0.00017	Ero1L, Acsl, Osbp, GCS2alpha, Rint1, CaBP1, Sec23, EMC1, PEK, wol, nmd, Pgant6, Sec63, PIG-S, gammaCOP, GAA1, Efr, CG9186, Cpr, Torsin, twr, CG6746, CG9175, SrpRbeta, LPCAT, Sec61alpha, Catsup, PIG-T, Spase12, Jafrac2, SPoCk, Grasp65, Surf4, Dad1
Gut	III	ATP synthesis coupled electron transport	TRUE	4	GO:0042773	ATP synthesis coupled electron transport	BP	34	23	10	2.2	1.2	6.5e-06	0.0002	ND-B12, ND-ASHI, ND-51, levy, ND-39, ND-SGDH, ND-B22, ND-42, ND-13B, ND-49, RFeSP, ND-24, UQCR-6.4, ND-B17.2, ND-B14.5B, UQCR-C1, ND-B16.6, ND-B17, UQCR-Q, UQCR-14, ND-20, ND-B15, ND-B14	Gpo1, Suv3, Gpdh1, ND-13A
Gut	III	purine ribonucleoside metabolic process	TRUE	6	GO:0046128	purine ribonucleoside metabolic process	BP	66	37	20	1.9	0.89	8.3e-06	0.00024	ND-B12, Adk3, Ppat-Dpck, ATPsynB, AdenoK, ND-ASHI, ND-51, levy, ND-39, cN-IIIB, fbl, ND-SGDH, ND-B22, ND-42, Suv3, Etf-QO, ND-13B, ND-49, Adgf-A, Ldh, Scox, RFeSP, ND-24, UQCR-6.4, ND-B17.2, ND-B14.5B, UQCR-C1, ND-B16.6, ND-B17, UQCR-Q, UQCR-14, ND-20, Lrpprc2, ND-B15, ND-B14, Tspo, Adk2	CG3434, r-l, Mtap, Prat, Dhfr
Gut	III	oxidation-reduction process	TRUE	1	GO:0055114	oxidation-reduction process	BP	190	83	56	1.5	0.56	9.2e-06	0.00025	CG17544, Ero1L, CG9743, Jafrac1, CG9527, Cyp9b2, ND-B12, CG14997, CG5167, Cyp9f2, Acox57D-d, P5cr, CG6287, ND-ASHI, Pgd, ND-51, CG11208, levy, Cyp28a5, Cyp6a13, ND-39, Gpo1, Sod2, ND-SGDH, ND-B22, sgl, ND-42, Suv3, Cyp4ad1, Cyp6u1, Cyp6a21, Etf-QO, fa2h, Cyp6a23, Cyp4p1, l(2)37Bb, Cyp6a8, Eip71CD, Arc42, CG6084, CG5028, ND-13B, Gpdh1, ND-49, Slimp, Ldh, CG7430, CPT2, RFeSP, Prx3, ND-24, UQCR-6.4,…
Gut	III	mitochondrion	TRUE	1	GO:0005739	mitochondrion	CC	240	100	73	1.4	0.49	1.1e-05	0.00028	mRpS16, ND-B12, CG3566, mRpL3, Adk3, ATPsynB, LeuRS-m, ND-ASHI, ND-51, levy, Mtch, ND-39, Gpo1, mRpL22, Sod2, ND-AGGG, ND-SGDH, mEFG1, mRpL37, ND-B22, nmd, Hmt-1, ND-42, Suv3, Pgam5, bonsai, mRpS33, GstO2, ifc, mRpL16, Etf-QO, ATPsynF, FeCH, mRpL1, Opa1, MetRS-m, Pdp, CG5028, ND-13B, ND-B14.7, ND-49, Slimp, aralar1, isoQC, beg, mRpS22, mRpL43, CG7430, Scox, mRpL38, PheRS-m, mRpL10, RFeSP, Prx3, N…
Gut	III	transferase activity, transferring glycosyl groups	TRUE	1	GO:0016757	transferase activity, transferring glycosyl groups	MF	19	15	5.8	2.6	1.4	1.5e-05	0.00036	Ugt35b, Ugt36Bc, CG3434, Dot, Alg2, CG18869, wol, Pgant6, CG10166, r-l, CG5724, Mtap, Prat, Pgant4, Dad1
Gut	III	mitochondrial part	TRUE	1	GO:0044429	mitochondrial part	CC	170	74	51	1.5	0.55	4.1e-05	0.00092	mRpS16, ND-B12, mRpL3, Adk3, ATPsynB, LeuRS-m, ND-ASHI, ND-51, levy, ND-39, Gpo1, mRpL22, Sod2, ND-AGGG, ND-SGDH, mRpL37, ND-B22, nmd, Hmt-1, ND-42, Suv3, bonsai, mRpS33, mRpL16, Etf-QO, ATPsynF, FeCH, mRpL1, MetRS-m, Pdp, CG5028, ND-13B, ND-B14.7, ND-49, aralar1, mRpS22, mRpL43, CG7430, Scox, mRpL38, mRpL10, RFeSP, ND-24, UQCR-6.4, Ucp4A, ND-B17.2, mRpL51, ND-B14.5B, mRpS29, UQCR-C1, mRpL49, mRp…
Gut	III	exopeptidase activity	TRUE	1	GO:0008238	exopeptidase activity	MF	24	17	7.3	2.3	1.2	4.5e-05	0.00095	DppIII, CG13630, CG4572, CG12374, CG31233, grsm, CG9953, Ance, CG10576, CG17633, CG3344, ApepP, CG17337, CG11034, CG2200, Dip-C, Psa
Gut	III	purine nucleoside monophosphate metabolic process	TRUE	8	GO:0009126	purine nucleoside monophosphate metabolic process	BP	65	35	20	1.8	0.83	4.8e-05	0.00095	ND-B12, Adk3, ATPsynB, AdenoK, ND-ASHI, ND-51, levy, ND-39, ND-SGDH, ND-B22, ND-42, Suv3, Etf-QO, ND-13B, ND-49, Ldh, Scox, RFeSP, ND-24, UQCR-6.4, ND-B17.2, ND-B14.5B, UQCR-C1, Dhfr, ND-B16.6, ND-B17, UQCR-Q, Prat, UQCR-14, ND-20, Lrpprc2, ND-B15, ND-B14, Tspo, Adk2	Ppat-Dpck, fbl, cN-IIIB, r-l, Pgd
Gut	III	endopeptidase activity	TRUE	1	GO:0004175	endopeptidase activity	MF	58	32	18	1.8	0.86	5.4e-05	0.001	CtsB1, CG18180, CG11911, Jon99Fii, thetaTry, epsilonTry, 26-29-p, etaTry, Ser6, Prosbeta2, Prosalpha4, CG5246, CalpB, Prosalpha1, CG15255, CG1304, Prosbeta4, goe, Prosbeta6, Drice, Prosbeta1, Prosbeta5, Jon65Aiv, UQCR-C1, Prosalpha7, Jon65Ai, CG7542, Prosalpha5, Ide, Swim, CG31267, Jon25Bii
Gut	III	cellular respiration	TRUE	3	GO:0045333	cellular respiration	BP	57	31	17	1.8	0.84	0.0001	0.0019	ND-B12, ND-ASHI, ND-51, levy, ND-39, Gpo1, ND-SGDH, ND-B22, ND-42, Suv3, CG5028, ND-13B, Gpdh1, ND-49, Slimp, CG7430, RFeSP, ND-24, UQCR-6.4, ND-B17.2, ND-B14.5B, UQCR-C1, ND-B16.6, Idh3b, ND-B17, UQCR-Q, UQCR-14, ND-20, ND-13A, ND-B15, ND-B14	Etf-QO, Ldh, Lrpprc2, Tspo
Gut	III	serine-type peptidase activity	TRUE	2	GO:0008236	serine-type peptidase activity	MF	32	20	9.7	2.1	1	0.00015	0.0025	CG18180, CG11911, Jon99Fii, thetaTry, epsilonTry, CG4572, etaTry, Ser6, CG9953, CG5246, CG1304, CG3344, Jon65Aiv, twr, Jon65Ai, CG7542, CG11034, CG31267, CG2200, Jon25Bii	CG5377
Gut	III	organophosphate metabolic process	TRUE	1	GO:0019637	organophosphate metabolic process	BP	110	50	34	1.5	0.57	0.00051	0.0085	CG15534, ND-B12, Adk3, Ppat-Dpck, ATPsynB, AdenoK, ND-ASHI, Pgd, ND-51, levy, ND-39, cN-IIIB, Gpo1, CG9784, fbl, ND-SGDH, ND-B22, ND-42, PIG-S, Suv3, GAA1, Etf-QO, r-l, ND-13B, Gpdh1, ND-49, Ldh, Scox, RFeSP, ND-24, UQCR-6.4, ND-B17.2, ND-B14.5B, UQCR-C1, Dhfr, LPCAT, ND-B16.6, Ipp, ND-B17, PIG-T, UQCR-Q, Prat, UQCR-14, ND-20, Lrpprc2, ND-B15, Pi3K59F, ND-B14, Tspo, Adk2
Gut	III	proteasome core complex	TRUE	8	GO:0005839	proteasome core complex	CC	11	9	3.3	2.7	1.4	0.00061	0.0097	Prosbeta2, Prosalpha4, Prosalpha1, Prosbeta4, Prosbeta6, Prosbeta1, Prosbeta5, Prosalpha7, Prosalpha5	Rpt6, Rpn7, Rpn10, CSN4, CSN5, twr, Spase12
Gut	III	O-acyltransferase activity	TRUE	2	GO:0008374	O-acyltransferase activity	MF	6	6	1.8	3.3	1.7	0.00076	0.011	CG4729, CG4753, CPT2, LPCAT, CG3209, CRAT	frj
Gut	III	hydrolase activity, acting on ether bonds	TRUE	1	GO:0016801	hydrolase activity, acting on ether bonds	MF	6	6	1.8	3.3	1.7	0.00076	0.011	Ahcy, CG1882, CG10602, AhcyL1, Jheh1, Jheh2
Gut	III	lipid metabolic process	TRUE	1	GO:0006629	lipid metabolic process	BP	94	43	28	1.5	0.59	0.00086	0.012	CG17544, CG9743, CG15534, CG9527, Acsl, Sap-r, Acox57D-d, frj, bmm, CG11208, CG9784, Hydr1, Gba1a, CG18135, Sply, PIG-S, CG5162, GAA1, slif, ifc, Etf-QO, fa2h, Cyp6a8, CG6295, Gpdh1, beg, CPT2, Jheh1, CG14688, CG6746, mag, LPCAT, Mtpalpha, Ipp, Lsd-2, PIG-T, Jheh2, Lpin, Pi3K59F, CRAT, Pex3, bgm, Hmgs
Gut	III	nucleotide metabolic process	TRUE	3	GO:0009117	nucleotide metabolic process	BP	89	41	27	1.5	0.6	0.00096	0.013	ND-B12, Adk3, Ppat-Dpck, ATPsynB, AdenoK, ND-ASHI, Pgd, ND-51, levy, ND-39, Gpo1, fbl, ND-SGDH, ND-B22, ND-42, Suv3, Etf-QO, r-l, ND-13B, Gpdh1, ND-49, Ldh, Scox, RFeSP, ND-24, UQCR-6.4, ND-B17.2, ND-B14.5B, UQCR-C1, Dhfr, ND-B16.6, ND-B17, UQCR-Q, Prat, UQCR-14, ND-20, Lrpprc2, ND-B15, ND-B14, Tspo, Adk2	cN-IIIB, CG3434, Adgf-A, Mtap, Dhod
Gut	III	membrane protein complex	TRUE	1	GO:0098796	membrane protein complex	CC	140	61	44	1.4	0.47	0.0012	0.015	CG4562, Pmp70, ND-B12, Vps29, Vha100-4, ATPsynB, CG10505, ND-ASHI, ND-51, levy, CG5853, Vha100-5, ND-39, alphaCOP, Sec23, EMC1, ND-AGGG, ND-SGDH, ND-B22, Hmt-1, Sec63, ND-42, PIG-S, gammaCOP, GAA1, AP-2mu, ATPsynF, CG5789, ND-13B, CG9663, ND-B14.7, ND-49, Vps2, RFeSP, ND-24, UQCR-6.4, CG9281, ND-B17.2, twr, ND-B14.5B, UQCR-C1, SrpRbeta, CHOp24, ND-B16.6, Sec61alpha, ND-B17, PIG-T, Chc, UQCR-Q, Sp…
Gut	III	cellular lipid metabolic process	TRUE	1	GO:0044255	cellular lipid metabolic process	BP	74	35	22	1.6	0.64	0.0013	0.016	CG17544, CG15534, CG9527, Acsl, Sap-r, Acox57D-d, frj, bmm, CG11208, CG9784, Gba1a, Sply, PIG-S, GAA1, ifc, Etf-QO, fa2h, Cyp6a8, Gpdh1, beg, CPT2, Jheh1, CG14688, CG6746, LPCAT, Mtpalpha, Ipp, PIG-T, Jheh2, Lpin, Pi3K59F, CRAT, Pex3, bgm, Hmgs
Gut	III	endoplasmic reticulum membrane	TRUE	3	GO:0005789	endoplasmic reticulum membrane	CC	16	11	4.8	2.3	1.2	0.0016	0.021	EMC1, Sec63, PIG-S, GAA1, twr, SrpRbeta, Sec61alpha, PIG-T, Spase12, Surf4, Dad1	GCS2alpha, Sec23, PEK, Torsin, Catsup
Gut	III	small molecule metabolic process	TRUE	1	GO:0044281	small molecule metabolic process	BP	270	100	81	1.3	0.33	0.0017	0.021	CG17544, CG5618, Jafrac1, CG9527, Acsl, Ass, ND-B12, Ahcy, Acox57D-d, Adk3, Ppat-Dpck, ATPsynB, LeuRS-m, P5cr, AdenoK, CG3434, ND-ASHI, Pgd, CAH1, ND-51, CG11208, levy, CG10184, Mtch, ND-39, cN-IIIB, Gpo1, fbl, AANAT1, CG17109, ND-SGDH, ND-B22, tzn, Sply, ND-42, Suv3, AhcyL1, Prosalpha1, CG9510, Etf-QO, fa2h, Cyp6a8, Eip71CD, ValRS, r-l, MetRS-m, Pdp, CG5028, beta-PheRS, ND-13B, Gpdh1, ND-49, Sel…
Gut	III	cofactor binding	TRUE	1	GO:0048037	cofactor binding	MF	63	30	19	1.6	0.65	0.0025	0.028	CG17544, CG5618, CG8628, Dbi, CG9527, Acox57D-d, CG5804, CG6287, ND-51, CG11208, ND-39, Sply, sgl, Arc42, CG5028, Gpdh1, ND-49, CG7430, Cpr, CG5854, Dhfr, Idh3b, UQCR-Q, CG7277, ND-20, CG9331, Got2, Trxr-1, Ddc, CG11236
Gut	III	coenzyme binding	TRUE	1	GO:0050662	coenzyme binding	MF	45	23	14	1.7	0.75	0.0025	0.028	CG17544, CG8628, Dbi, CG9527, Acox57D-d, CG5804, CG6287, ND-51, CG11208, ND-39, sgl, Arc42, CG5028, Gpdh1, ND-49, CG7430, CG5854, Dhfr, Idh3b, CG7277, CG9331, Trxr-1, CG11236
Gut	III	carboxypeptidase activity	TRUE	1	GO:0004180	carboxypeptidase activity	MF	5	5	1.5	3.3	1.7	0.0025	0.028	CG4572, CG12374, CG9953, CG17633, CG3344
Gut	III	organelle membrane	TRUE	1	GO:0031090	organelle membrane	CC	150	62	46	1.3	0.43	0.0027	0.029	Pmp70, ND-B12, Vps29, Vha100-4, ATPsynB, ND-ASHI, ND-51, levy, Vha100-5, ND-39, Gpo1, alphaCOP, Sec23, ND-AGGG, ND-SGDH, ND-B22, nmd, Hmt-1, Sec63, ND-42, gammaCOP, AP-2mu, Etf-QO, ATPsynF, FeCH, ND-13B, ND-B14.7, ND-49, aralar1, Vps2, Scox, RFeSP, ND-24, UQCR-6.4, Ucp4A, ND-B17.2, ND-B14.5B, UQCR-C1, SrpRbeta, CHOp24, ND-B16.6, Rop, Sec61alpha, Cchl, ND-B17, Chc, UQCR-Q, Dhod, UQCR-14, ND-20, CO…
Gut	III	organellar ribosome	TRUE	3	GO:0000313	organellar ribosome	CC	38	20	12	1.7	0.8	0.0031	0.032	mRpS16, mRpL3, mRpL22, mRpL37, bonsai, mRpS33, mRpL16, mRpL1, mRpS22, mRpL43, mRpL38, mRpL10, mRpL51, mRpS29, mRpL49, mRpS30, CG4866, mRpS18A, mRpL9, mRpL15	mEFG1, Suv3, Lrpprc2
Gut	III	metallopeptidase activity	TRUE	1	GO:0008237	metallopeptidase activity	MF	26	15	7.9	1.9	0.93	0.0032	0.033	CG13630, CG12374, CG31233, grsm, CG31198, CG10602, Ance, CG15255, CG17633, goe, ApepP, CG17337, UQCR-C1, Ide, Psa
Gut	III	serine-type endopeptidase activity	TRUE	1	GO:0004252	serine-type endopeptidase activity	MF	24	14	7.3	1.9	0.94	0.0038	0.038	CG18180, CG11911, Jon99Fii, thetaTry, epsilonTry, etaTry, Ser6, CG5246, CG1304, Jon65Aiv, Jon65Ai, CG7542, CG31267, Jon25Bii
Gut	III	carbohydrate derivative biosynthetic process	TRUE	1	GO:1901137	carbohydrate derivative biosynthetic process	BP	44	22	13	1.6	0.72	0.0044	0.043	Adk3, Ppat-Dpck, ATPsynB, AdenoK, CG3434, Gmd, fbl, wol, sgl, PIG-S, GAA1, Efr, CG10166, r-l, Scox, Dhfr, PIG-T, Prat, Pgant4, mmy, Arl1, Adk2
Gut	III	UDP-glycosyltransferase activity	TRUE	2	GO:0008194	UDP-glycosyltransferase activity	MF	9	7	2.7	2.6	1.4	0.0045	0.043	Ugt35b, Ugt36Bc, Dot, wol, Pgant6, CG5724, Pgant4	Alg2, CG18869, CG10166, Dad1
Gut	IV	cytosolic ribosome	TRUE	6	GO:0022626	cytosolic ribosome	CC	54	35	7.4	4.7	2.2	1.1e-18	2.6e-16	RpS10b, RpS15Aa, RpL18, RpL26, RpS3, RpL21, RpS2, RpL18A, RpL27A, RpL3, RpL35A, RpS4, RpL13A, RpS13, RpL15, RpL32, RpL35, RpS7, RpL37A, RpL27, RpS27, RpL5, RpL34b, RpL7, RpL7A, RpS19a, RpL37a, mRpS7, RpL12, RpS26, RpL9, RpL17, RpL11, RpL36A, RpS17	Rack1, MCTS1, eIF4E1, mRpL2
Gut	IV	cytosolic large ribosomal subunit	TRUE	2	GO:0022625	cytosolic large ribosomal subunit	CC	31	23	4.2	5.4	2.4	1.5e-14	1.8e-12	RpL18, RpL26, RpL21, RpL18A, RpL27A, RpL3, RpL35A, RpL13A, RpL15, RpL32, RpL35, RpL37A, RpL27, RpL5, RpL34b, RpL7, RpL7A, RpL37a, RpL12, RpL9, RpL17, RpL11, RpL36A	mRpL2
Gut	IV	cytosol	TRUE	1	GO:0005829	cytosol	CC	180	54	25	2.1	1.1	3.4e-09	2.7e-07	CkIIbeta, RpS10b, Rack1, CkIIalpha, RpS15Aa, RpL18, CG2680, Tango2, RpL26, RpS3, RpL21, CG6983, RpS2, CG1440, RpL18A, RpL27A, RpL3, RpL35A, eIF4A, RpS4, RpL13A, eRF3, RpS13, RpL15, Gdh, RpL32, strat, Ptpmeg2, CG7920, RpL35, l(2)gl, RpS7, RpL37A, RpL27, RpS27, CG32147, RpL5, RpL34b, RpL7, RpL7A, RpS19a, RpL37a, car, mRpS7, RpL12, RpS26, RpL9, RpL17, RpL11, RpL36A, eIF4E1, RpS17, eIF3i, CTPsyn
Gut	IV	translation	TRUE	5	GO:0006412	translation	BP	170	49	23	2.1	1.1	2.3e-08	1.4e-06	RpS10b, Rack1, RpS15Aa, RpL18, RpL26, RpS3, RpL21, RpS2, RpL18A, RpL27A, RpL3, RpL35A, eIF4A, RpS4, RpL13A, eRF3, RpS13, RpL15, RpL32, mRpL2, RpL35, RpS7, RpL37A, RpL27, RpS27, RpL5, RpL34b, RpL7, RpL7A, MCTS1, me31B, RpS19a, AGO1, RpL37a, Rheb, mRpS7, RpL12, Cbp80, RpS26, RpL9, RpL17, RpL11, mEFTs, RpL36A, Srp9, eIF4E1, eIF3f1, RpS17, eIF3i	GstD10, Gss2, GstT3, GstD4, schlank
Gut	IV	ribonucleoprotein complex	TRUE	1	GO:1990904	ribonucleoprotein complex	CC	180	48	24	2	0.99	4.1e-07	2e-05	RpS10b, Rack1, RpS15Aa, RpL18, RpL26, RpS3, RpL21, RpS2, RpL18A, RpL27A, RpL3, RpL35A, eIF4A, RpS4, RpL13A, RpS13, RpL15, RpL32, mRpL2, RpL35, Hel25E, RpS7, RpL37A, RpL27, RpS27, RpL5, RpL34b, RpL7, RpL7A, me31B, RpS19a, AGO1, RpL37a, mRpS7, RpL12, nito, Cbp80, RpS26, RpL9, RpL17, RpL11, SmD2, RpL36A, Srp9, eIF4E1, CG17266, RpS17, Srp54k
Gut	IV	centrosome duplication	TRUE	3	GO:0051298	centrosome duplication	BP	27	14	3.7	3.8	1.9	2.2e-06	8.7e-05	RpL21, RpL18A, RpL27A, RpL3, RpS4, RpL13A, RpL35, RpL27, RpL7, RpL7A, mts, RpL9, RpL17, RpL11	Act57B, eIF4A
Gut	IV	cytosolic small ribosomal subunit	TRUE	2	GO:0022627	cytosolic small ribosomal subunit	CC	23	12	3.2	3.8	1.9	1.1e-05	0.00038	RpS10b, RpS15Aa, RpS3, RpS2, RpS4, RpS13, RpS7, RpS27, RpS19a, mRpS7, RpS26, RpS17
Gut	IV	structural molecule activity	TRUE	1	GO:0005198	structural molecule activity	MF	160	40	22	1.8	0.86	4.7e-05	0.0014	RpS10b, RpS15Aa, RpL18, Mhc, Ank, RpL26, RpS3, RpL21, Act57B, RpS2, RpL18A, Act87E, RpL27A, RpL3, RpL35A, RpS4, RpL13A, RpS13, RpL15, RpL32, mRpL2, RpL35, RpS7, RpL37A, RpL27, RpS27, RpL5, RpL34b, RpL7, RpL7A, RpS19a, RpL37a, mRpS7, RpL12, RpS26, RpL9, RpL17, RpL11, RpL36A, RpS17
Gut	IV	cell cycle process	TRUE	2	GO:0022402	cell cycle process	BP	150	35	20	1.7	0.78	0.00049	0.013	vib, CkIIalpha, Rho1, RpS3, RpL21, Act57B, RpL18A, RpL27A, RpL3, eIF4A, RpS4, Rab35, RpL13A, rl, pita, RpL35, l(2)gl, RpL27, Pp1-87B, RpL7, flw, RpL7A, me31B, Eb1, 14-3-3epsilon, Rab5, mts, aPKC, Rheb, RpL9, Ran, RpL17, RpL11, SmD2, eIF4E1	Cka, Ubc4
Gut	IV	protein phosphorylation	TRUE	2	GO:0006468	protein phosphorylation	BP	76	21	10	2	1	0.0008	0.018	CkIIbeta, Rac2, CkIIalpha, Rho1, trc, rl, Ptpmeg2, gish, CASK, l(2)gl, Pp1-87B, CkIalpha, flw, 14-3-3epsilon, aPKC, Tao, Cdc42, Cka, krz, raw, Pka-R1	Pgi, CG17027, Cyt-c1, CG6218, UQCR-11
Gut	IV	ligase activity, forming carbon-nitrogen bonds	TRUE	2	GO:0016879	ligase activity, forming carbon-nitrogen bonds	MF	17	8	2.3	3.4	1.8	0.00088	0.018	Gss2, CG7900, CG5191, CG5112, Gs2, Ppcs, PCB, CTPsyn	CG3961, Scsalpha, SdhA
Gut	IV	microtubule cytoskeleton organization	TRUE	2	GO:0000226	microtubule cytoskeleton organization	BP	87	23	12	1.9	0.95	0.00089	0.018	RpL21, Act57B, RpL18A, RpL27A, RpL3, eIF4A, RpS4, RpL13A, RpL35, l(2)gl, RpL27, Pp1-87B, RpL7, RpL7A, Eb1, 14-3-3epsilon, mts, aPKC, RpL9, Ran, RpL17, RpL11, Pka-R1	Dhc93AB
Gut	IV	GTPase activity	TRUE	4	GO:0003924	GTPase activity	MF	31	11	4.2	2.6	1.4	0.0017	0.031	Rac2, Rho1, Rab35, eRF3, Rab10, Rab5, Rheb, Cdc42, Ran, Dgp-1, Srp54k
Gut	IV	tricarboxylic acid cycle	TRUE	2	GO:0006099	tricarboxylic acid cycle	BP	15	7	2	3.4	1.8	0.002	0.034	HDAC6, CG1544, Nc73EF, kdn, Scsalpha, SdhA, l(1)G0255	Gdh
Brain	I	regulation of RNA biosynthetic process	TRUE	3	GO:2001141	regulation of RNA biosynthetic process	BP	53	31	18	1.8	0.82	8e-05	0.016	Ote, MED1, TFAM, Rcd1, mip120, Rtf1, yps, Lam, Hrs, CG15356, Ssb-c31a, mip40, TfIIA-L, Dref, Nelf-A, Srp54, atms, Adf1, Myb, Su(z)2, XNP, Cp190, CoRest, Sap130, Iswi, Rsf1, Spt5, Rbfox1, Bap55, CG42724, ebi
Brain	I	chromosomal part	TRUE	1	GO:0044427	chromosomal part	CC	36	23	12	1.9	0.95	0.00011	0.016	mip120, CG4747, Mad1, Rtf1, CG7379, CG15356, prod, mip40, Chro, atms, Adf1, Myb, Su(z)2, XNP, Cp190, Sap130, Iswi, Rm62, Spt5, Bap55, Bx42, Mhc, SMC1
Brain	I	negative regulation of nitrogen compound metabolic process	TRUE	2	GO:0051172	negative regulation of nitrogen compound metabolic process	BP	35	22	12	1.9	0.92	0.00022	0.022	Ote, mip120, swm, Lam, RnpS1, Ssb-c31a, mip40, Nelf-A, Su(z)2, XNP, Cp190, snRNP-U1-70K, CoRest, Iswi, Rsf1, Atx2, Acn, Spt5, Rbfox1, Bap55, ebi, Cbp20	Rm62, SMC1
Brain	I	negative regulation of RNA metabolic process	TRUE	2	GO:0051253	negative regulation of RNA metabolic process	BP	24	16	8	2	1	0.00067	0.034	Ote, mip120, swm, Lam, Ssb-c31a, mip40, Nelf-A, Su(z)2, XNP, Cp190, snRNP-U1-70K, CoRest, Iswi, Rsf1, Spt5, ebi	RnpS1, Acn
Brain	I	negative regulation of cellular metabolic process	TRUE	3	GO:0031324	negative regulation of cellular metabolic process	BP	46	26	15	1.7	0.77	0.00067	0.034	Ote, mip120, ATPsynD, swm, Patj, Lam, Hrs, RnpS1, Ssb-c31a, mip40, Nelf-A, Su(z)2, XNP, Cp190, snRNP-U1-70K, CoRest, SelD, Iswi, Rsf1, Atx2, Acn, Spt5, Rbfox1, Bap55, ebi, Cbp20	Rm62, SMC1
Brain	I	polytene chromosome	TRUE	1	GO:0005700	polytene chromosome	CC	22	15	7.3	2.1	1	0.0007	0.034	mip120, CG4747, Hcs, Dref, Chro, Adf1, Myb, XNP, Cp190, Iswi, Rm62, Spt5, Mhc, ebi, SMC1
Brain	I	chromosome	TRUE	1	GO:0005694	chromosome	CC	54	29	18	1.6	0.7	0.001	0.042	TFAM, mip120, Rcc1, CG4747, Mad1, Rtf1, CG7379, CG15356, prod, mip40, Hcs, CG6664, Dref, Chro, atms, Adf1, Myb, Su(z)2, XNP, Cp190, Sap130, Iswi, Rm62, Spt5, Bap55, Bx42, Mhc, ebi, SMC1
Brain	II	post-embryonic animal organ development	TRUE	6	GO:0048569	post-embryonic animal organ development	BP	47	22	9	2.4	1.3	8.2e-06	0.0016	LanA, CG6767, drk, krz, Lsd-2, Dif, Cip4, dlg1, Hsp27, bun, cora, if, ct, fs(1)h, bol, lgs, Paics, crp, Src42A, heph, rept, par-1	Pten, E(bx)
Brain	II	cell fate determination	TRUE	1	GO:0001709	cell fate determination	BP	14	10	2.7	3.7	1.9	2.6e-05	0.0026	14-3-3zeta, dlg1, peb, Pten, bun, hts, Rab11, msi, ct, par-1
Brain	II	axis specification	TRUE	1	GO:0009798	axis specification	BP	26	14	5	2.8	1.5	6.2e-05	0.0034	14-3-3zeta, drk, Tm1, SmD3, Syp, mago, peb, Rab11, cact, fs(1)h, glo, heph, tral, par-1
Brain	II	wing disc morphogenesis	TRUE	11	GO:0007472	wing disc morphogenesis	BP	36	17	6.9	2.5	1.3	8.6e-05	0.0034	LanA, CG6767, drk, Lsd-2, Cip4, Hsp27, bun, cora, if, ct, fs(1)h, bol, lgs, Paics, Src42A, heph, par-1	dlg1, rept
Brain	II	myofibril assembly	TRUE	8	GO:0030239	myofibril assembly	BP	18	11	3.4	3.2	1.7	8.7e-05	0.0034	Mf, sls, up, Prm, wupA, hts, Tm2, if, Mlc2, Zasp52, bt	Syp, bun, cact, Pax
Brain	II	cellular component assembly	TRUE	1	GO:0022607	cellular component assembly	BP	120	37	22	1.7	0.75	0.00023	0.0073	LanA, SF2, Mf, sls, kst, ben, Tm1, SmD3, Cip4, dlg1, up, Syp, mago, Dap160, Prm, wupA, Pten, bun, hts, Tm2, Rab11, cora, cact, Tsf2, if, Lac, Mlc2, E(bx), glo, Zasp52, Src42A, Pax, bt, Jupiter, GMF, cpx, par-1
Brain	II	ovarian follicle cell development	TRUE	5	GO:0030707	ovarian follicle cell development	BP	32	15	6.1	2.4	1.3	0.00026	0.0073	kst, drk, Cip4, dlg1, Syp, cindr, Pten, bun, Rab11, cact, if, ct, Pax, GMF, par-1	peb, cora
Brain	II	animal organ morphogenesis	TRUE	1	GO:0009887	animal organ morphogenesis	BP	89	30	17	1.8	0.81	0.00041	0.0099	LanA, CG6767, 14-3-3zeta, drk, Lsd-2, Dif, Cip4, dlg1, up, toy, peb, cindr, Pten, Hsp27, bun, Rab11, cora, if, Hrb98DE, Lac, ct, fs(1)h, bol, lgs, Paics, Src42A, heph, rept, p47, par-1
Brain	II	morphogenesis of an epithelium	TRUE	2	GO:0002009	morphogenesis of an epithelium	BP	62	23	12	1.9	0.95	0.00045	0.0099	LanA, CG6767, drk, Lsd-2, Cip4, dlg1, peb, Pten, Hsp27, bun, Rab11, cora, if, Lac, ct, fs(1)h, bol, lgs, Paics, Src42A, heph, rept, par-1
Brain	II	sequence-specific DNA binding	TRUE	1	GO:0043565	sequence-specific DNA binding	MF	10	7	1.9	3.7	1.9	0.00061	0.012	Dif, scro, toy, Hrb98DE, ct, crp, mod
Brain	II	wing disc development	TRUE	3	GO:0035220	wing disc development	BP	56	21	11	2	0.97	0.0007	0.012	LanA, CG6767, Mf, drk, Lsd-2, Cip4, peb, Hsp27, bun, cora, if, ct, fs(1)h, bol, lgs, Paics, Nop60B, Src42A, heph, Pax, par-1	dlg1, Sep2, toy, Idgf6, rept
Brain	II	cell fate commitment	TRUE	1	GO:0045165	cell fate commitment	BP	42	17	8	2.1	1.1	0.00085	0.014	14-3-3zeta, drk, dlg1, trol, peb, cindr, Pten, bun, hts, Rab11, Ptp69D, msi, E(bx), ct, SLIRP2, bol, par-1
Brain	II	myofilament	TRUE	6	GO:0036379	myofilament	CC	8	6	1.5	3.9	2	0.00091	0.014	sls, Tm1, up, Prm, wupA, Tm2	kst, hts, Mlc2, Zasp52, Mf, bt
Brain	II	embryo development	TRUE	1	GO:0009790	embryo development	BP	54	20	10	1.9	0.95	0.0011	0.016	LanA, 14-3-3zeta, drk, ben, krz, Tm1, SmD3, dlg1, mago, peb, Rab11, cora, if, Lac, ct, fs(1)h, lgs, glo, Src42A, par-1
Brain	II	germ cell development	TRUE	2	GO:0007281	germ cell development	BP	94	30	18	1.7	0.74	0.0012	0.016	14-3-3zeta, kst, drk, skap, Tm1, SmD3, Cip4, dlg1, Syp, mago, Sep2, cindr, Rbp9, Pten, bun, hts, Rab11, cact, if, msi, Hrb98DE, ct, glo, Nop60B, mod, heph, Pax, GMF, tral, par-1	E(bx), bol
Brain	II	cellular component morphogenesis	TRUE	1	GO:0032989	cellular component morphogenesis	BP	99	31	19	1.6	0.71	0.0014	0.016	LanA, Mf, sls, drk, ben, Tm1, up, trol, Syp, scro, peb, Prm, wupA, Pten, bun, hts, Tm2, Rab11, cact, if, Ptp69D, Mlc2, E(bx), ct, fs(1)h, Zasp52, Src42A, Pax, bt, sm, par-1
Brain	II	regionalization	TRUE	2	GO:0003002	regionalization	BP	40	16	7.7	2.1	1.1	0.0014	0.016	drk, Tm1, SmD3, Syp, mago, peb, bun, Rab11, cora, cact, ct, fs(1)h, lgs, glo, tral, par-1	14-3-3zeta, heph
Brain	II	actin cytoskeleton organization	TRUE	2	GO:0030036	actin cytoskeleton organization	BP	55	20	11	1.9	0.92	0.0015	0.016	Mf, sls, drk, Cip4, up, cindr, Prm, wupA, Pten, hts, Tm2, Rab11, if, Mlc2, Zasp52, Src42A, bt, GMF, tral, par-1
Brain	II	oocyte construction	TRUE	6	GO:0007308	oocyte construction	BP	20	10	3.8	2.6	1.4	0.0016	0.017	14-3-3zeta, Tm1, SmD3, Syp, mago, Rab11, glo, heph, tral, par-1	hts, ben, Sucb, Pten
Brain	II	anatomical structure formation involved in morphogenesis	TRUE	1	GO:0048646	anatomical structure formation involved in morphogenesis	BP	72	24	14	1.7	0.8	0.002	0.02	14-3-3zeta, Mf, sls, skap, Cip4, up, Syp, Sep2, Rbp9, Prm, wupA, bun, hts, Tm2, Rab11, cact, if, Mlc2, ct, Zasp52, heph, Pax, bt, par-1
Brain	II	regulation of cellular protein metabolic process	TRUE	2	GO:0032268	regulation of cellular protein metabolic process	BP	49	18	9.4	1.9	0.94	0.0023	0.021	14-3-3zeta, drk, ben, skap, krz, LKRSDH, Syp, mago, peb, Dap160, msi, Hrb98DE, Cdc37, bol, glo, heph, Not3, par-1
Brain	II	oogenesis	TRUE	2	GO:0048477	oogenesis	BP	81	26	16	1.7	0.74	0.0024	0.022	14-3-3zeta, kst, drk, Tm1, SmD3, Cip4, dlg1, Syp, mago, Sep2, cindr, Rbp9, Pten, bun, hts, Rab11, cact, if, Hrb98DE, ct, glo, heph, Pax, GMF, tral, par-1
Brain	II	mesoderm development	TRUE	1	GO:0007498	mesoderm development	BP	12	7	2.3	3.1	1.6	0.0028	0.024	LanA, sls, Cip4, up, Prm, Swip-1, bt
Brain	II	regulation of reproductive process	TRUE	2	GO:2000241	regulation of reproductive process	BP	7	5	1.3	3.7	1.9	0.0037	0.029	dlg1, mago, Rab11, bol, par-1	LanA, ben
Brain	II	intercellular bridge	TRUE	2	GO:0045171	intercellular bridge	CC	7	5	1.3	3.7	1.9	0.0037	0.029	14-3-3zeta, Sep2, cindr, hts, par-1	Cip4, Rbp9, Rab11
Brain	II	cytoskeleton organization	TRUE	1	GO:0007010	cytoskeleton organization	BP	100	30	19	1.5	0.63	0.0044	0.033	14-3-3zeta, Mf, sls, drk, skap, Cip4, dlg1, up, mago, cindr, Prm, wupA, Pten, hts, Tm2, Rab11, cora, if, Mlc2, Hsc70-3, Map205, Zasp52, Src42A, heph, Pax, bt, Jupiter, GMF, tral, par-1
Brain	II	pole plasm assembly	TRUE	19	GO:0007315	pole plasm assembly	BP	10	6	1.9	3.1	1.6	0.0048	0.034	Tm1, SmD3, mago, Rab11, glo, par-1	drk, peb, fs(1)h, lgs, ct, bun
Brain	II	neuromuscular junction	TRUE	1	GO:0031594	neuromuscular junction	CC	10	6	1.9	3.1	1.6	0.0048	0.034	Cip4, Con, dlg1, cact, cpx, par-1
Brain	II	sarcomere organization	TRUE	2	GO:0045214	sarcomere organization	BP	13	7	2.5	2.8	1.5	0.0051	0.035	sls, up, wupA, hts, Tm2, if, bt	SmD3
Brain	II	mRNA processing	TRUE	3	GO:0006397	mRNA processing	BP	53	18	10	1.8	0.82	0.0062	0.04	SF2, CG3689, SmD3, nonA, Syp, mago, Pnn, Dek, elav, SmD1, msi, mub, Hrb98DE, CG10333, ps, scaf6, heph, sm	CG14100, Nop60B, Elp1, Not3
Brain	II	defense response	TRUE	1	GO:0006952	defense response	BP	34	13	6.5	2	1	0.0065	0.041	LanA, Tg, krz, Dif, Pten, Hsp27, cact, Flo2, CG10333, E(bx), CG13994, Src42A, Elp1
Brain	II	muscle structure development	TRUE	1	GO:0061061	muscle structure development	BP	46	16	8.8	1.8	0.86	0.0075	0.046	Mf, sls, SmD3, up, Prm, wupA, Pten, hts, Tm2, cora, if, Mlc2, crp, Zasp52, Pax, bt
Brain	III	ribosomal subunit	TRUE	3	GO:0044391	ribosomal subunit	CC	40	32	11	2.8	1.5	5.9e-12	1.3e-09	RpL37A, RpS12, RpS9, RpS29, RpL10, RpL10Ab, RpS15Aa, RpS26, RpL18, RpL3, RpS5a, mRpL23, mRpL18, RpS3, RpS27, RpL29, RpS11, RpL9, RpS18, RpL17, RpL13A, RpL4, RpL26, RpL21, RpL7, RpL12, RpS19a, RpL32, RpS21, RpL19, mRpS21, mRpS25	CG10602
Brain	III	cytosolic ribosome	TRUE	3	GO:0022626	cytosolic ribosome	CC	34	28	9.7	2.9	1.5	4e-11	4.4e-09	RpL37A, RpS12, RpS9, RpS29, RpL10, RpL10Ab, RpS15Aa, RpS26, RpL18, RpL3, RpS5a, RpS3, RpS27, RpL29, RpS11, RpL9, RpS18, RpL17, RpL13A, RpL4, RpL26, RpL21, RpL7, RpL12, RpS19a, RpL32, RpS21, RpL19	Blos1
Brain	III	cytosolic large ribosomal subunit	TRUE	2	GO:0022625	cytosolic large ribosomal subunit	CC	19	16	5.4	2.9	1.6	5.3e-07	3.9e-05	RpL37A, RpL10, RpL10Ab, RpL18, RpL3, RpL29, RpL9, RpL17, RpL13A, RpL4, RpL26, RpL21, RpL7, RpL12, RpL32, RpL19	mRpL23, mRpL18
Brain	III	peptide metabolic process	TRUE	2	GO:0006518	peptide metabolic process	BP	81	43	23	1.9	0.9	8.3e-07	4.6e-05	RpL37A, GstD10, RpS12, RpS9, GstD9, CG4829, eEF5, CG10602, RpS29, GstD1, RpL10, RpL10Ab, RpS15Aa, Gclc, RpS26, eEF2, RpL18, RpL3, RpS5a, mRpL23, mRpL18, RpS3, RpS27, RpL29, RpS11, Dp1, RpL9, RpS18, RpL17, RpL13A, RpL4, RpL26, RpL21, RpL7, Gss2, RpL12, RpS19a, RpL32, RpS21, RpL19, AGO1, mRpS21, mRpS25
Brain	III	cytosol	TRUE	1	GO:0005829	cytosol	CC	92	47	26	1.8	0.84	1e-06	4.6e-05	RpL37A, CG8036, RpS12, RpS9, CG6084, eEF5, RpS29, RpL10, Atg3, Tudor-SN, RpL10Ab, RpS15Aa, RpS26, eEF2, PpD3, CG1440, RpL18, RpL3, RpS5a, CG6983, RpS3, RpS27, Fim, RpL29, CkIIbeta, RpS11, Argk, RpL9, Rtnl1, RpS18, RpL17, Ald, RpL13A, CG31997, RpL4, RpL26, RpL21, RpL7, RpL12, Gdi, RpS19a, RpL32, t, RpS21, RpL19, hth, Blos1
Brain	III	translation	TRUE	3	GO:0006412	translation	BP	69	37	20	1.9	0.91	4.1e-06	0.00015	RpL37A, RpS12, RpS9, eEF5, CG10602, RpS29, RpL10, RpL10Ab, RpS15Aa, RpS26, eEF2, RpL18, RpL3, RpS5a, mRpL23, mRpL18, RpS3, RpS27, RpL29, RpS11, Dp1, RpL9, RpS18, RpL17, RpL13A, RpL4, RpL26, RpL21, RpL7, RpL12, RpS19a, RpL32, RpS21, RpL19, AGO1, mRpS21, mRpS25	Gclc, Gss2
Brain	III	structural molecule activity	TRUE	1	GO:0005198	structural molecule activity	MF	82	41	23	1.8	0.81	1.2e-05	0.00038	Cpr62Bb, RpL37A, RpS12, RpS9, CG10602, RpS29, betaTub60D, RpL10, RpL10Ab, RpS15Aa, RpS26, Arp2, RpL18, RpL3, RpS5a, mRpL23, mRpL18, Arp3, alpha-Cat, RpS3, RpS27, RpL29, RpS11, RpL9, RpS18, RpL17, Chc, RpL13A, RpL4, RpL26, RpL21, RpL7, betaTub97EF, RpL12, RpS19a, RpL32, RpS21, RpL19, mRpS21, Sec13, mRpS25
Brain	III	cytosolic small ribosomal subunit	TRUE	2	GO:0022627	cytosolic small ribosomal subunit	CC	15	12	4.3	2.8	1.5	4.5e-05	0.0012	RpS12, RpS9, RpS29, RpS15Aa, RpS26, RpS5a, RpS3, RpS27, RpS11, RpS18, RpS19a, RpS21	mRpS21, mRpS25
Thorax	II	cytosolic ribosome	TRUE	7	GO:0022626	cytosolic ribosome	CC	16	13	3.5	3.7	1.9	4e-07	1.6e-05	RpS5a, RpS16, RpL32, RpL30, RpS7, RpL7, RpL17, RpL12, RpL22, RpS19a, RpL35A, RpS25, RpL28	eIF3m, Yp3, eIF4A
Thorax	II	cytosolic large ribosomal subunit	TRUE	2	GO:0022625	cytosolic large ribosomal subunit	CC	8	8	1.8	4.6	2.2	4.2e-06	5.6e-05	RpL32, RpL30, RpL7, RpL17, RpL12, RpL22, RpL35A, RpL28
Thorax	II	translation	TRUE	5	GO:0006412	translation	BP	28	17	6.2	2.8	1.5	4.3e-06	5.6e-05	RpS5a, RpS16, UK114, RpL32, RpL30, RpS7, RpL7, RpL17, RpL12, eIF4A, RpL22, RpS19a, RpL35A, RpS25, bam, RpL28, GlyRS	Gss2
Thorax	II	cytosol	TRUE	1	GO:0005829	cytosol	CC	43	21	9.5	2.2	1.2	3e-05	0.00029	RpS5a, RpS16, RpL32, CG6084, RpL30, Jafrac1, RpS7, Paics, RpL7, RpL17, Mdh1, RpL12, eIF4A, RpL22, RpS19a, RpL35A, RpS25, Prx2540-2, Flo2, RpL28, eIF3m
Thorax	II	structural molecule activity	TRUE	1	GO:0005198	structural molecule activity	MF	46	18	10	1.8	0.83	0.0038	0.029	Yp3, Yp2, Yp1, apolpp, RpS5a, RpS16, RpL32, RpL30, RpS7, RpL7, RpL17, RpL12, RpL22, RpS19a, RpL35A, RpS25, Flo2, RpL28
Thorax	II	ligase activity, forming carbon-nitrogen bonds	TRUE	2	GO:0016879	ligase activity, forming carbon-nitrogen bonds	MF	9	6	2	3	1.6	0.0046	0.03	Paics, pug, CG8839, Gss2, Gs2, Mccc1	GlyRS, Mccc2
Thorax	III	extracellular region part	TRUE	1	GO:0044421	extracellular region part	CC	36	18	7.9	2.3	1.2	8.7e-05	0.0044	CG5867, PPO2, Cpr47Ef, CG5791, regucalcin, Def, vkg, Cpr60D, Tep2, cv-d, mfas, DptB, Glt, 14-3-3zeta, Cpr67B, Cul3, Cpr49Ae, Cpr47Ea
Thorax	III	programmed cell death	TRUE	2	GO:0012501	programmed cell death	BP	8	6	1.8	3.4	1.8	0.0019	0.03	Ect3, Cp1, Prx3, Galphaq, Cam, Cul3
Thorax	III	positive regulation of protein metabolic process	TRUE	13	GO:0051247	positive regulation of protein metabolic process	BP	6	5	1.3	3.8	1.9	0.0023	0.03	drk, Crk, 14-3-3zeta, Cul3, smt3	cv-d, bai, vkg, vib, Def, Gie
Thorax	III	extracellular space	TRUE	1	GO:0005615	extracellular space	CC	16	9	3.5	2.6	1.4	0.0024	0.03	CG5867, PPO2, CG5791, regucalcin, Def, Tep2, cv-d, mfas, DptB
Thorax	IV	catalytic complex	TRUE	1	GO:1902494	catalytic complex	CC	28	18	7.6	2.4	1.2	2.2e-05	0.0017	Cyt-c1, CanA1, ND-B16.6, ND-49, Gpo1, Pdha, Dhc64C, nrv1, ND-42, ND-ASHI, Pfk, NP15.6, PhKgamma, CG1703, Gpdh1, ABCB7, ND-B14.7, nrv3
Thorax	IV	organelle inner membrane	TRUE	7	GO:0019866	organelle inner membrane	CC	29	17	7.9	2.2	1.1	0.00021	0.0082	Cyt-c1, ND-B16.6, CG5903, Mitofilin, ttm50, ND-49, Gpo1, CG7772, CG6404, ND-42, ND-ASHI, NP15.6, FeCH, COX6B, ABCB7, DPCoAC, ND-B14.7	AP-1-2beta, VhaSFD, CG8086
Thorax	IV	membrane protein complex	TRUE	1	GO:0098796	membrane protein complex	CC	33	18	9	2	1	0.00047	0.01	Cyt-c1, ND-B16.6, CG5903, ttm50, VhaAC45, mys, ND-49, nrv1, ND-42, ND-ASHI, AP-1-2beta, NP15.6, CG1703, COX6B, VhaSFD, ABCB7, ND-B14.7, nrv3
Thorax	IV	plasma membrane part	TRUE	2	GO:0044459	plasma membrane part	CC	14	10	3.8	2.6	1.4	0.00057	0.01	Zasp52, VhaAC45, mys, scrib, nrv1, AP-1-2beta, CG1703, VhaSFD, ABCB7, nrv3	l(2)01289, CG8888
Thorax	IV	muscle structure development	TRUE	1	GO:0061061	muscle structure development	BP	21	13	5.7	2.3	1.2	0.00064	0.01	Mhc, Zasp52, Unc-89, Mlc2, Zasp66, Pax, mys, bt, Mlp60A, shot, CAP, Pfk, EloB
Thorax	IV	energy derivation by oxidation of organic compounds	TRUE	2	GO:0015980	energy derivation by oxidation of organic compounds	BP	24	14	6.5	2.1	1.1	0.00091	0.012	Gdh, GlyS, Cyt-c1, GlyP, ND-B16.6, CG9485, Idh3b, ND-49, Gpo1, ND-42, ND-ASHI, NP15.6, PhKgamma, Gpdh1	Pfk, Pgi
Thorax	IV	adherens junction	TRUE	5	GO:0005912	adherens junction	CC	5	5	1.4	3.7	1.9	0.0014	0.016	Zasp52, Pax, mys, shot, CAP	scrib
Thorax	IV	carbohydrate catabolic process	TRUE	1	GO:0016052	carbohydrate catabolic process	BP	7	6	1.9	3.1	1.6	0.002	0.019	GlyS, GlyP, CG9485, Pfk, PhKgamma, Pgi
Thorax	IV	myofibril assembly	TRUE	8	GO:0030239	myofibril assembly	BP	10	7	2.7	2.6	1.4	0.0053	0.037	Mhc, Zasp52, Unc-89, Mlc2, Zasp66, mys, bt	Pax, Pfk, CG17816, mgr
Thorax	IV	Z disc	TRUE	6	GO:0030018	Z disc	CC	8	6	2.2	2.8	1.5	0.0062	0.037	Zasp52, Zasp66, bt, Mlp60A, CG1674, Gpdh1	Mhc, Unc-89, Mlc2, mys
Thorax	IV	NADH dehydrogenase complex	TRUE	9	GO:0030964	NADH dehydrogenase complex	CC	8	6	2.2	2.8	1.5	0.0062	0.037	ND-B16.6, ND-49, ND-42, ND-ASHI, NP15.6, ND-B14.7	Cyt-c1, COX6B, CG5903, ttm50
Thorax	IV	mitochondrial part	TRUE	1	GO:0044429	mitochondrial part	CC	51	22	14	1.6	0.66	0.0063	0.037	Gdh, Cyt-c1, mRpL12, ND-B16.6, CG5903, Mitofilin, ttm50, ND-49, Gpo1, CG7772, CG6404, ND-42, ND-ASHI, NP15.6, slgA, FeCH, COX6B, Sod2, ABCB7, mRpS35, DPCoAC, ND-B14.7
Thorax	IV	transporter complex	TRUE	9	GO:1990351	transporter complex	CC	6	5	1.6	3.1	1.6	0.0065	0.037	Cyt-c1, nrv1, CG1703, ABCB7, nrv3	VhaAC45, mys, AP-1-2beta, VhaSFD, Mhc, Dhc64C
Thorax	IV	regulation of immune system process	TRUE	2	GO:0002682	regulation of immune system process	BP	15	9	4.1	2.2	1.1	0.0067	0.037	CanA1, RyR, GlyP, scrib, DptA, cher, Sod2, Dif, DPCoAC	mys, Dhc64C, AttB
Thorax	IV	electron transport chain	TRUE	4	GO:0022900	electron transport chain	BP	13	8	3.5	2.3	1.2	0.0087	0.043	Cyt-c1, ND-B16.6, ND-49, Gpo1, ND-42, ND-ASHI, NP15.6, Gpdh1	Gdh, Idh3b, Pdha, ND-B14.7
Thorax	IV	ATPase activity	TRUE	5	GO:0016887	ATPase activity	MF	18	10	4.9	2	1	0.0088	0.043	Mhc, CG2658, VhaAC45, Dhc64C, CG8520, nrv1, CG1703, VhaSFD, ABCB7, nrv3	Mlc2, eEF1alpha2
Thorax	IV	sensory perception of pain	TRUE	2	GO:0019233	sensory perception of pain	BP	21	11	5.7	1.9	0.94	0.011	0.046	mRpL12, Men-b, ttm50, VhaAC45, Pdha, CG8520, AP-1-2beta, b, ND-B14.7, nrv3, AttB	mys, CAP, CG8086
Thorax	IV	cofactor metabolic process	TRUE	1	GO:0051186	cofactor metabolic process	BP	21	11	5.7	1.9	0.94	0.011	0.046	Gdh, Gpo1, Pdha, CG7277, Pfk, Pgi, FeCH, Gpdh1, ABCB7, CG1774, Updo
