# Supplementary material for: Tissue-specific modulation of gene expression in response to lowered insulin signalling in Drosophila
Source: eLife. 2021 Apr 21;10:e67275. doi: 10.7554/eLife.67275 (PMC8060030; doi:10.7554/eLife.67275)
Supplement: Supplementary file 6. — Each sheet shows tissue-specific (fat, gut, brain, or thorax) enrichments. [file elife-67275-supp6.xlsx]

## Sheet: Summary
[Tissue]_wolDep	GO enrichment analysis of Wolbachia-dependent proteins in the respective tissue
_Prot	Protein
_Transcript	Transcript
GO ID	Gene ontology ID
Ontology	Gene ontology domain (Biological Process, Molecular Function, or Cellular Compartment)
Term	Gene ontology term
Annotated	Number of genes annotated with the term in the tissue-specific background
Significant	Number of significant genes annotated with the term in the tissue-specific background
Expected	Expected number of significant genes annotated with the term, given the background
Enrichment	Enrichment of the observed over the expected number of significant genes
log2Enrichment	Log2 of enrichment
P.Val.	P-value of enrichment (Fisher test)
adj.P.Val.	adjusted P-Value of enrichment (BH-method)
Genes	Names of significant genes annotated with the term

## Sheet: Fat_wolDep_Prot
Primary	Is.primary	Terms.in.cluster	GO.ID	Term	Ontology	Annotated	Significant	Expected	Enrichment	log2Enrichment	Fisher	Primary.Fisher.adj		Genes.in.secondary
nuclear DNA replication	FALSE	12	GO:0006267	pre-replicative complex assembly involved in nuclear cell cycle DNA replication	BP	5	5	0.27	18.38	4.2	4.5e-07		Mcm2, Mcm6, Mcm5, Mcm7, Mcm3
nuclear DNA replication	TRUE	12	GO:0033260	nuclear DNA replication	BP	5	5	0.27	18.38	4.2	4.5e-07	4.9e-06	Mcm2, Mcm6, Mcm5, Mcm7, Mcm3	dpa, Df31, M1BP, RPA2
nuclear DNA replication	FALSE	12	GO:0036388	pre-replicative complex assembly	BP	5	5	0.27	18.38	4.2	4.5e-07		Mcm2, Mcm6, Mcm5, Mcm7, Mcm3
nuclear DNA replication	FALSE	12	GO:1902299	pre-replicative complex assembly involved in cell cycle DNA replication	BP	5	5	0.27	18.38	4.2	4.5e-07		Mcm2, Mcm6, Mcm5, Mcm7, Mcm3
nuclear DNA replication	FALSE	12	GO:0005656	nuclear pre-replicative complex	CC	5	5	0.27	18.38	4.2	4.5e-07		Mcm2, Mcm6, Mcm5, Mcm7, Mcm3
nuclear DNA replication	FALSE	12	GO:0036387	pre-replicative complex	CC	5	5	0.27	18.38	4.2	4.5e-07		Mcm2, Mcm6, Mcm5, Mcm7, Mcm3
nuclear DNA replication	FALSE	12	GO:0006270	DNA replication initiation	BP	7	6	0.38	15.78	4	1.6e-07		Mcm2, dpa, Mcm6, Mcm5, Mcm7, Mcm3
nuclear DNA replication	FALSE	12	GO:0042555	MCM complex	CC	7	6	0.38	15.78	4	1.6e-07		Mcm2, dpa, Mcm6, Mcm5, Mcm7, Mcm3
nuclear DNA replication	FALSE	12	GO:0043138	3'-5' DNA helicase activity	MF	7	6	0.38	15.78	4	1.6e-07		Mcm2, dpa, Mcm6, Mcm5, Mcm7, Mcm3
egg coat formation	FALSE	6	GO:0007305	vitelline membrane formation involved in chorion-containing eggshell formation	BP	8	5	0.43	11.55	3.5	2.2e-05		Vml, Cp36, Vm34Ca, Vm32E, psd
egg coat formation	FALSE	6	GO:0030704	vitelline membrane formation	BP	8	5	0.43	11.55	3.5	2.2e-05		Vml, Cp36, Vm34Ca, Vm32E, psd
egg coat formation	TRUE	6	GO:0035803	egg coat formation	BP	8	5	0.43	11.55	3.5	2.2e-05	0.00017	Vml, Cp36, Vm34Ca, Vm32E, psd	Pen
DNA helicase activity	TRUE	2	GO:0003678	DNA helicase activity	MF	15	9	0.81	11.08	3.5	1.3e-08	3.5e-07	Mcm2, RfC4, dpa, rept, Mcm6, Mcm5, pont, Mcm7, Mcm3	me31B
structural constituent of chorion	TRUE	2	GO:0005213	structural constituent of chorion	MF	9	5	0.49	10.27	3.4	4.7e-05	0.00032	Cp36, Cp38, Cp19, dec-1, Femcoat	Syp, PCNA, Mcm6
chorion	TRUE	2	GO:0042600	chorion	CC	22	12	1.2	10.06	3.3	1.9e-10	1e-08	CG13114, Mur2B, Cp19, dec-1, Cp7Fa, CG13083, CG13084, psd, Cp7Fc, Cp7Fb, CG15570, CG11381	Vml
chorion	FALSE	2	GO:0030312	external encapsulating structure	CC	25	13	1.4	9.58	3.3	7e-11		Vml, CG13114, Mur2B, Cp19, dec-1, Cp7Fa, CG13083, CG13084, psd, Cp7Fc, Cp7Fb, CG15570, CG11381
alpha-1,4-glucosidase activity	TRUE	5	GO:0004558	alpha-1,4-glucosidase activity	MF	10	5	0.54	9.19	3.2	9e-05	0.00055	Mal-A7, Mal-A8, Mal-A1, Mal-A2, tobi	Amy-d, CG14309
nuclear DNA replication	FALSE	12	GO:0044786	cell cycle DNA replication	BP	11	5	0.6	8.4	3.1	0.00016		Mcm2, Mcm6, Mcm5, Mcm7, Mcm3
egg coat formation	FALSE	6	GO:0085029	extracellular matrix assembly	BP	11	5	0.6	8.4	3.1	0.00016		Vml, Cp36, Vm34Ca, Vm32E, psd
alpha-1,4-glucosidase activity	FALSE	5	GO:0090599	alpha-glucosidase activity	MF	11	5	0.6	8.4	3.1	0.00016		Mal-A7, Mal-A8, Mal-A1, Mal-A2, tobi
DNA-dependent DNA replication	FALSE	3	GO:0006260	DNA replication	BP	31	13	1.7	7.73	3	2.1e-09		PCNA, Gnf1, RnrL, Mcm2, RfC4, mtSSB, dpa, RfC38, Mcm6, Mcm5, RPA2, Mcm7, Mcm3
alpha-1,4-glucosidase activity	FALSE	5	GO:0015926	glucosidase activity	MF	12	5	0.65	7.67	2.9	0.00026		Mal-A7, Mal-A8, Mal-A1, Mal-A2, tobi
DNA-dependent DNA replication	TRUE	3	GO:0006261	DNA-dependent DNA replication	BP	25	10	1.4	7.36	2.9	2.8e-07	3.9e-06	PCNA, Mcm2, RfC4, dpa, RfC38, Mcm6, Mcm5, RPA2, Mcm7, Mcm3	Gnf1, RnrL, mtSSB, piwi, Su(var)2-10
protein-DNA complex subunit organization	TRUE	1	GO:0071824	protein-DNA complex subunit organization	BP	28	10	1.5	6.59	2.7	9.8e-07	9e-06	Df31, Mcm2, Nlp, rept, Mcm6, Mcm5, pont, M1BP, Mcm7, Mcm3
nuclear DNA replication	FALSE	12	GO:0065004	protein-DNA complex assembly	BP	20	7	1.1	6.45	2.7	5.3e-05		Df31, Mcm2, Mcm6, Mcm5, M1BP, Mcm7, Mcm3
meiotic chromosome segregation	TRUE	6	GO:0045132	meiotic chromosome segregation	BP	16	5	0.87	5.78	2.5	0.0012	0.006	gammaTub37C, RfC4, mtrm, Mcm5, cup	RfC38, vih, dhd
DNA-dependent ATPase activity	TRUE	1	GO:0008094	DNA-dependent ATPase activity	MF	16	5	0.87	5.78	2.5	0.0012	0.006	Gnf1, RfC4, RfC38, rept, pont
nuclear DNA replication	FALSE	12	GO:0032993	protein-DNA complex	CC	21	6	1.1	5.28	2.4	0.00065		Mcm2, Mcm6, Mcm5, RPA2, Mcm7, Mcm3
chorion-containing eggshell formation	TRUE	3	GO:0007304	chorion-containing eggshell formation	BP	53	15	2.9	5.21	2.4	6.1e-08	1.1e-06	Syp, Vml, Cp36, Cp38, Cp19, PCNA, dec-1, Vm34Ca, Cp7Fa, Mcm6, Vm32E, psd, Cp7Fc, Cp7Fb, Femcoat
chorion-containing eggshell formation	FALSE	3	GO:0030703	eggshell formation	BP	54	15	2.9	5.13	2.4	8.1e-08		Syp, Vml, Cp36, Cp38, Cp19, PCNA, dec-1, Vm34Ca, Cp7Fa, Mcm6, Vm32E, psd, Cp7Fc, Cp7Fb, Femcoat
lipid transport	TRUE	3	GO:0006869	lipid transport	BP	19	5	1	4.86	2.3	0.0028	0.012	apolpp, Npc2h, Npc2g, cv-d, CG6299	ImpL2, foxo, Lsd-1, CG3860
egg coat formation	FALSE	6	GO:0030198	extracellular matrix organization	BP	23	5	1.2	4	2	0.0068		Vml, Cp36, Vm34Ca, Vm32E, psd
DNA helicase activity	FALSE	2	GO:0004386	helicase activity	MF	48	10	2.6	3.84	1.9	0.00019		me31B, Mcm2, RfC4, dpa, rept, Mcm6, Mcm5, pont, Mcm7, Mcm3
meiotic chromosome segregation	FALSE	6	GO:0007143	female meiotic nuclear division	BP	24	5	1.3	3.84	1.9	0.0082		gammaTub37C, dhd, RfC4, mtrm, cup
regulation of behavior	TRUE	1	GO:0050795	regulation of behavior	BP	29	6	1.6	3.81	1.9	0.0039	0.014	Est-6, me31B, AANAT1, foxo, Acer, Gabat
structural constituent of chorion	FALSE	2	GO:0007306	eggshell chorion assembly	BP	39	8	2.1	3.78	1.9	0.00094		Syp, Cp36, Cp38, Cp19, PCNA, dec-1, Mcm6, Femcoat
hormone metabolic process	TRUE	2	GO:0042445	hormone metabolic process	BP	25	5	1.4	3.68	1.9	0.0098	0.034	Est-6, Jheh3, Spn42Da, foxo, eloF
DNA-dependent DNA replication	FALSE	3	GO:0006259	DNA metabolic process	BP	79	15	4.3	3.51	1.8	1.5e-05		PCNA, Gnf1, RnrL, Mcm2, RfC4, mtSSB, dpa, RfC38, Mcm6, Mcm5, RPA2, piwi, Su(var)2-10, Mcm7, Mcm3
G2 DNA damage checkpoint	FALSE	26	GO:0000077	DNA damage checkpoint	BP	48	9	2.6	3.46	1.8	0.0009		me31B, RfC4, Rpb5, rept, pont, M1BP, Su(var)2-10, Mcm7, Mcm3
G2 DNA damage checkpoint	FALSE	26	GO:0031570	DNA integrity checkpoint	BP	48	9	2.6	3.46	1.8	0.0009		me31B, RfC4, Rpb5, rept, pont, M1BP, Su(var)2-10, Mcm7, Mcm3
egg coat formation	FALSE	6	GO:0043062	extracellular structure organization	BP	32	6	1.7	3.46	1.8	0.0066		Vml, Cp36, Pen, Vm34Ca, Vm32E, psd
serine-type endopeptidase activity	TRUE	3	GO:0004252	serine-type endopeptidase activity	MF	38	7	2.1	3.39	1.8	0.0037	0.014	alphaTry, CG40160, CG5246, Ser6, yip7, Jon65Aiii, Jon74E
ribonucleoprotein granule	TRUE	9	GO:0035770	ribonucleoprotein granule	CC	28	5	1.5	3.29	1.7	0.016	0.048	Syp, me31B, exu, cup, tral	gammaTub37C, Vml
G2 DNA damage checkpoint	FALSE	26	GO:0007095	mitotic G2 DNA damage checkpoint	BP	46	8	2.5	3.2	1.7	0.0029		me31B, Rpb5, rept, pont, M1BP, Su(var)2-10, Mcm7, Mcm3
G2 DNA damage checkpoint	FALSE	26	GO:0010972	negative regulation of G2/M transition of mitotic cell cycle	BP	46	8	2.5	3.2	1.7	0.0029		me31B, Rpb5, rept, pont, M1BP, Su(var)2-10, Mcm7, Mcm3
G2 DNA damage checkpoint	TRUE	26	GO:0031572	G2 DNA damage checkpoint	BP	46	8	2.5	3.2	1.7	0.0029	0.012	me31B, Rpb5, rept, pont, M1BP, Su(var)2-10, Mcm7, Mcm3	RfC4, Capr, vih
G2 DNA damage checkpoint	FALSE	26	GO:0044773	mitotic DNA damage checkpoint	BP	46	8	2.5	3.2	1.7	0.0029		me31B, Rpb5, rept, pont, M1BP, Su(var)2-10, Mcm7, Mcm3
G2 DNA damage checkpoint	FALSE	26	GO:0044774	mitotic DNA integrity checkpoint	BP	46	8	2.5	3.2	1.7	0.0029		me31B, Rpb5, rept, pont, M1BP, Su(var)2-10, Mcm7, Mcm3
G2 DNA damage checkpoint	FALSE	26	GO:0044818	mitotic G2/M transition checkpoint	BP	46	8	2.5	3.2	1.7	0.0029		me31B, Rpb5, rept, pont, M1BP, Su(var)2-10, Mcm7, Mcm3
G2 DNA damage checkpoint	FALSE	26	GO:1902750	negative regulation of cell cycle G2/M phase transition	BP	46	8	2.5	3.2	1.7	0.0029		me31B, Rpb5, rept, pont, M1BP, Su(var)2-10, Mcm7, Mcm3
G2 DNA damage checkpoint	FALSE	26	GO:0010389	regulation of G2/M transition of mitotic cell cycle	BP	47	8	2.6	3.14	1.6	0.0033		me31B, Rpb5, rept, pont, M1BP, Su(var)2-10, Mcm7, Mcm3
peptidyl-lysine modification	FALSE	4	GO:0016569	covalent chromatin modification	BP	47	8	2.6	3.14	1.6	0.0033		Hat1, NO66, Art8, vig2, rept, pont, piwi, Hcs
G2 DNA damage checkpoint	FALSE	26	GO:1902749	regulation of cell cycle G2/M phase transition	BP	47	8	2.6	3.14	1.6	0.0033		me31B, Rpb5, rept, pont, M1BP, Su(var)2-10, Mcm7, Mcm3
G2 DNA damage checkpoint	FALSE	26	GO:0000086	G2/M transition of mitotic cell cycle	BP	48	8	2.6	3.07	1.6	0.0038		me31B, Rpb5, rept, pont, M1BP, Su(var)2-10, Mcm7, Mcm3
G2 DNA damage checkpoint	FALSE	26	GO:0000075	cell cycle checkpoint	BP	56	9	3	2.97	1.6	0.0028		me31B, RfC4, Rpb5, rept, pont, M1BP, Su(var)2-10, Mcm7, Mcm3
lipid transport	FALSE	3	GO:0010876	lipid localization	BP	50	8	2.7	2.95	1.6	0.0049		ImpL2, foxo, apolpp, Npc2h, Npc2g, Lsd-1, cv-d, CG6299
G2 DNA damage checkpoint	FALSE	26	GO:0044839	cell cycle G2/M phase transition	BP	50	8	2.7	2.95	1.6	0.0049		me31B, Rpb5, rept, pont, M1BP, Su(var)2-10, Mcm7, Mcm3
serine-type endopeptidase activity	FALSE	3	GO:0008236	serine-type peptidase activity	MF	45	7	2.4	2.87	1.5	0.0097		alphaTry, CG40160, CG5246, Ser6, yip7, Jon65Aiii, Jon74E
peptidyl-lysine modification	FALSE	4	GO:0016570	histone modification	BP	46	7	2.5	2.81	1.5	0.011		Hat1, NO66, Art8, vig2, rept, pont, Hcs
DNA packaging	TRUE	2	GO:0006323	DNA packaging	BP	40	6	2.2	2.77	1.5	0.019	0.056	Df31, Mcm2, RfC4, Nlp, Mcm5, Su(var)2-10
chromatin binding	TRUE	2	GO:0003682	chromatin binding	MF	47	7	2.6	2.75	1.5	0.012	0.04	Mcm2, foxo, Mcm6, Mcm5, mRpL12, Mcm7, Mcm3	Galphai, sn
serine-type endopeptidase activity	FALSE	3	GO:0017171	serine hydrolase activity	MF	47	7	2.6	2.75	1.5	0.012		alphaTry, CG40160, CG5246, Ser6, yip7, Jon65Aiii, Jon74E
G2 DNA damage checkpoint	FALSE	26	GO:0007093	mitotic cell cycle checkpoint	BP	54	8	2.9	2.73	1.4	0.0079		me31B, Rpb5, rept, pont, M1BP, Su(var)2-10, Mcm7, Mcm3
chorion-containing eggshell formation	FALSE	3	GO:0010927	cellular component assembly involved in morphogenesis	BP	82	12	4.4	2.69	1.4	0.0013		Syp, Vml, Cp36, Cp38, Cp19, PCNA, dec-1, Vm34Ca, Mcm6, Vm32E, psd, Femcoat
alpha-1,4-glucosidase activity	FALSE	5	GO:0016798	hydrolase activity, acting on glycosyl bonds	MF	49	7	2.7	2.64	1.4	0.015		Mal-A7, Mal-A8, Mal-A1, Mal-A2, Amy-d, tobi, CG14309
DNA repair	TRUE	1	GO:0006281	DNA repair	BP	35	5	1.9	2.64	1.4	0.039	0.11	PCNA, Gnf1, RfC4, RPA2, Su(var)2-10
hormone metabolic process	FALSE	2	GO:0010817	regulation of hormone levels	BP	35	5	1.9	2.64	1.4	0.039		Est-6, Jheh3, Spn42Da, foxo, eloF
G2 DNA damage checkpoint	FALSE	26	GO:1901988	negative regulation of cell cycle phase transition	BP	57	8	3.1	2.58	1.4	0.011		me31B, Rpb5, rept, pont, M1BP, Su(var)2-10, Mcm7, Mcm3
G2 DNA damage checkpoint	FALSE	26	GO:1901991	negative regulation of mitotic cell cycle phase transition	BP	57	8	3.1	2.58	1.4	0.011		me31B, Rpb5, rept, pont, M1BP, Su(var)2-10, Mcm7, Mcm3
nucleus organization	TRUE	1	GO:0006997	nucleus organization	BP	36	5	2	2.57	1.4	0.043	0.11	coil, alphaTub67C, Ance, Nlp, sle
G2 DNA damage checkpoint	FALSE	26	GO:0010948	negative regulation of cell cycle process	BP	58	8	3.2	2.55	1.4	0.012		me31B, Rpb5, rept, pont, M1BP, Su(var)2-10, Mcm7, Mcm3
G2 DNA damage checkpoint	FALSE	26	GO:0045930	negative regulation of mitotic cell cycle	BP	59	8	3.2	2.5	1.3	0.013		me31B, Rpb5, rept, pont, M1BP, Su(var)2-10, Mcm7, Mcm3
G2 DNA damage checkpoint	FALSE	26	GO:1901987	regulation of cell cycle phase transition	BP	67	9	3.6	2.48	1.3	0.0094		me31B, Rpb5, rept, pont, M1BP, vih, Su(var)2-10, Mcm7, Mcm3
G2 DNA damage checkpoint	FALSE	26	GO:1901990	regulation of mitotic cell cycle phase transition	BP	67	9	3.6	2.48	1.3	0.0094		me31B, Rpb5, rept, pont, M1BP, vih, Su(var)2-10, Mcm7, Mcm3
G2 DNA damage checkpoint	FALSE	26	GO:0045786	negative regulation of cell cycle	BP	60	8	3.3	2.46	1.3	0.015		me31B, Rpb5, rept, pont, M1BP, Su(var)2-10, Mcm7, Mcm3
DNA packaging	FALSE	2	GO:0071103	DNA conformation change	BP	45	6	2.4	2.46	1.3	0.033		Df31, Mcm2, RfC4, Nlp, Mcm5, Su(var)2-10
meiotic chromosome segregation	FALSE	6	GO:0098813	nuclear chromosome segregation	BP	53	7	2.9	2.43	1.3	0.023		gammaTub37C, RfC4, mtrm, RfC38, Mcm5, cup, vih
alpha-1,4-glucosidase activity	FALSE	5	GO:0004553	hydrolase activity, hydrolyzing O-glycosyl compounds	MF	47	6	2.6	2.35	1.2	0.04		Mal-A7, Mal-A8, Mal-A1, Mal-A2, Amy-d, tobi
G2 DNA damage checkpoint	FALSE	26	GO:0044772	mitotic cell cycle phase transition	BP	72	9	3.9	2.3	1.2	0.015		me31B, Rpb5, rept, pont, M1BP, vih, Su(var)2-10, Mcm7, Mcm3
G2 DNA damage checkpoint	FALSE	26	GO:0044770	cell cycle phase transition	BP	74	9	4	2.23	1.2	0.017		me31B, Rpb5, rept, pont, M1BP, vih, Su(var)2-10, Mcm7, Mcm3
defense response to bacterium	FALSE	3	GO:0009617	response to bacterium	BP	95	11	5.2	2.13	1.1	0.013		Hsp27, Hat1, Ance, Myo61F, NimB2, CBP, TotA, foxo, Pebp1, IM33, Su(var)2-10
G2 DNA damage checkpoint	FALSE	26	GO:0007346	regulation of mitotic cell cycle	BP	88	10	4.8	2.1	1.1	0.02		me31B, Rpb5, Capr, rept, pont, M1BP, vih, Su(var)2-10, Mcm7, Mcm3
G2 DNA damage checkpoint	FALSE	26	GO:0010564	regulation of cell cycle process	BP	79	9	4.3	2.1	1.1	0.026		me31B, Rpb5, rept, pont, M1BP, vih, Su(var)2-10, Mcm7, Mcm3
wound healing	FALSE	2	GO:0009611	response to wounding	BP	62	7	3.4	2.08	1.1	0.049		Cbp53E, RnrL, sn, Gs1l, Npc2h, Npc2g, Hml
organic acid biosynthetic process	FALSE	2	GO:0044283	small molecule biosynthetic process	BP	71	8	3.8	2.07	1	0.037		Ass, Pepck, CG30008, foxo, eloF, CG7277, Cbs, Baldspot

## Sheet: gut_wolDep_Prot
Primary	Is.primary	Terms.in.cluster	GO.ID	Term	Ontology	Annotated	Significant	Expected	Enrichment	log2Enrichment	Fisher	Primary.Fisher.adj	Genes	Genes.in.secondary
mannose metabolic process	TRUE	11	GO:0006013	mannose metabolic process	BP	6	5	0.17	28.64	4.8	1.1e-07	1.1e-06	LManII, LManI, LManVI, LManV, LManIII	Mal-A2, Mal-A3, CG16965, Idgf4, rgn
mannose metabolic process	FALSE	11	GO:0004559	alpha-mannosidase activity	MF	6	5	0.17	28.64	4.8	1.1e-07		LManII, LManI, LManVI, LManV, LManIII
mannose metabolic process	FALSE	11	GO:0015923	mannosidase activity	MF	7	5	0.2	24.59	4.6	3.8e-07		LManII, LManI, LManVI, LManV, LManIII
structural constituent of chitin-based larval cuticle	TRUE	4	GO:0008010	structural constituent of chitin-based larval cuticle	MF	23	5	0.67	7.46	2.9	0.00042	0.0014	Lcp2, Lcp3, Lcp4, Lcp9, Lcp65Ab1	dally, Mur29B, Muc11A
mannose metabolic process	FALSE	11	GO:0004553	hydrolase activity, hydrolyzing O-glycosyl compounds	MF	43	9	1.2	7.21	2.8	2.6e-06		Mal-A2, Mal-A3, LManII, CG16965, LManI, LManVI, LManV, LManIII, Idgf4
mannose metabolic process	FALSE	11	GO:0016798	hydrolase activity, acting on glycosyl bonds	MF	45	9	1.3	6.87	2.8	3.8e-06		Mal-A2, Mal-A3, LManII, CG16965, LManI, LManVI, LManV, LManIII, Idgf4
structural constituent of chitin-based larval cuticle	FALSE	4	GO:0005214	structural constituent of chitin-based cuticle	MF	25	5	0.73	6.87	2.8	0.00063		Lcp2, Lcp3, Lcp4, Lcp9, Lcp65Ab1
structural constituent of chitin-based larval cuticle	FALSE	4	GO:0042302	structural constituent of cuticle	MF	26	5	0.76	6.59	2.7	0.00076		Lcp2, Lcp3, Lcp4, Lcp9, Lcp65Ab1
mannose metabolic process	FALSE	11	GO:0030246	carbohydrate binding	MF	32	6	0.93	6.45	2.7	0.00026		LManII, LManI, LManVI, LManV, LManIII, rgn
structural constituent of chitin-based larval cuticle	FALSE	4	GO:0031012	extracellular matrix	CC	44	8	1.3	6.23	2.6	2.9e-05		Lcp2, Lcp3, Lcp4, Lcp9, Lcp65Ab1, dally, Mur29B, Muc11A
serine-type endopeptidase activity	TRUE	3	GO:0004252	serine-type endopeptidase activity	MF	43	7	1.2	5.58	2.5	0.00019	0.00097	Jon99Cii, betaTry, etaTry, zetaTry, CG16749, CG1304, Jon65Aiv	CG3734, CG11034
serine-type endopeptidase activity	FALSE	3	GO:0008236	serine-type peptidase activity	MF	56	9	1.6	5.5	2.5	2.5e-05		Jon99Cii, betaTry, etaTry, zetaTry, CG3734, CG16749, CG11034, CG1304, Jon65Aiv
serine-type endopeptidase activity	FALSE	3	GO:0017171	serine hydrolase activity	MF	58	9	1.7	5.31	2.4	3.4e-05		Jon99Cii, betaTry, etaTry, zetaTry, CG3734, CG16749, CG11034, CG1304, Jon65Aiv
molting cycle	FALSE	4	GO:0007591	molting cycle, chitin-based cuticle	BP	40	6	1.2	5.17	2.4	0.0009		Lcp2, Lcp3, Lcp9, Idgf6, dally, Idgf4
molting cycle	TRUE	4	GO:0042303	molting cycle	BP	40	6	1.2	5.17	2.4	0.0009	0.0022	Lcp2, Lcp3, Lcp9, Idgf6, dally, Idgf4	Lcp4, Lcp65Ab1
mannose metabolic process	FALSE	11	GO:0000323	lytic vacuole	CC	34	5	0.99	5.06	2.3	0.0027		LManII, LManI, LManVI, LManV, LManIII
mannose metabolic process	FALSE	11	GO:0005764	lysosome	CC	34	5	0.99	5.06	2.3	0.0027		LManII, LManI, LManVI, LManV, LManIII
molting cycle	FALSE	4	GO:0040003	chitin-based cuticle development	BP	51	7	1.5	4.72	2.2	0.00058		Lcp2, Lcp3, Lcp4, Lcp9, Lcp65Ab1, Idgf6, Idgf4
molting cycle	FALSE	4	GO:0042335	cuticle development	BP	75	8	2.2	3.66	1.9	0.0013		Lcp2, Lcp3, Lcp4, Lcp9, Lcp65Ab1, Idgf6, dally, Idgf4
secondary active transmembrane transporter activity	TRUE	3	GO:0015291	secondary active transmembrane transporter activity	MF	56	5	1.6	3.07	1.6	0.022	0.045	CG8468, Nha2, Calx, NKCC, ine	cype, ox
mannose metabolic process	FALSE	11	GO:0019318	hexose metabolic process	BP	81	7	2.4	2.97	1.6	0.0085		Mal-A2, Mal-A3, LManII, LManI, LManVI, LManV, LManIII
mannose metabolic process	FALSE	11	GO:0005996	monosaccharide metabolic process	BP	83	7	2.4	2.89	1.5	0.0097		Mal-A2, Mal-A3, LManII, LManI, LManVI, LManV, LManIII

## Sheet: Brain_wolDep_Prot
Primary	Is.primary	Terms.in.cluster	GO.ID	Term	Ontology	Annotated	Significant	Expected	Enrichment	log2Enrichment	Fisher	Primary.Fisher.adj	Genes	Genes.in.secondary
structural constituent of chitin-based larval cuticle	TRUE	6	GO:0008010	structural constituent of chitin-based larval cuticle	MF	39	22	1.1	20.53	4.4	9.2e-26	8.3e-25	Cpr47Ea, Cpr47Ee, Cpr49Aa, Acp65Aa, Lcp65Ac, CG34461, Cpr50Cb, Cpr57A, Cpr30F, Cpr65Au, resilin, Cpr100A, Cpr97Eb, Cpr92F, Cpr78Cc, Cpr66D, Cpr72Ec, Cpr73D, Cpr76Bd, Cpr64Ac, Cpr64Aa, Cpr62Bc	Crys, Acp1
structural constituent of chitin-based larval cuticle	FALSE	6	GO:0005214	structural constituent of chitin-based cuticle	MF	43	24	1.2	20.39	4.4	5.9e-28		Cpr47Ea, Cpr47Ee, Cpr49Aa, Acp65Aa, Lcp65Ac, Acp1, CG34461, Cpr50Cb, Cpr57A, Cpr30F, Cpr65Au, resilin, Cpr100A, Cpr97Eb, Cpr92F, Crys, Cpr78Cc, Cpr66D, Cpr72Ec, Cpr73D, Cpr76Bd, Cpr64Ac, Cpr64Aa, Cpr62Bc
structural constituent of chitin-based larval cuticle	FALSE	6	GO:0042302	structural constituent of cuticle	MF	44	24	1.2	19.84	4.3	1.3e-27		Cpr47Ea, Cpr47Ee, Cpr49Aa, Acp65Aa, Lcp65Ac, Acp1, CG34461, Cpr50Cb, Cpr57A, Cpr30F, Cpr65Au, resilin, Cpr100A, Cpr97Eb, Cpr92F, Crys, Cpr78Cc, Cpr66D, Cpr72Ec, Cpr73D, Cpr76Bd, Cpr64Ac, Cpr64Aa, Cpr62Bc
structural constituent of chitin-based larval cuticle	FALSE	6	GO:0031012	extracellular matrix	CC	61	23	1.7	13.74	3.8	9.3e-22		Cpr47Ea, Cpr47Ee, Cpr49Aa, Acp65Aa, Lcp65Ac, CG34461, Cpr50Cb, Cpr57A, Cpr30F, Cpr65Au, resilin, Cpr100A, Cpr97Eb, Cpr92F, Crys, Cpr78Cc, Cpr66D, Cpr72Ec, Cpr73D, Cpr76Bd, Cpr64Ac, Cpr64Aa, Cpr62Bc
structural constituent of chitin-based larval cuticle	FALSE	6	GO:0040003	chitin-based cuticle development	BP	64	22	1.8	12.55	3.6	8.8e-20		Cpr47Ea, Cpr47Ee, Cpr49Aa, Acp65Aa, Lcp65Ac, CG34461, Cpr50Cb, Cpr57A, Cpr30F, Cpr65Au, resilin, Cpr100A, Cpr97Eb, Cpr92F, Cpr78Cc, Cpr66D, Cpr72Ec, Cpr73D, Cpr76Bd, Cpr64Ac, Cpr64Aa, Cpr62Bc
structural constituent of chitin-based larval cuticle	FALSE	6	GO:0042335	cuticle development	BP	86	22	2.4	9.32	3.2	1.2e-16		Cpr47Ea, Cpr47Ee, Cpr49Aa, Acp65Aa, Lcp65Ac, CG34461, Cpr50Cb, Cpr57A, Cpr30F, Cpr65Au, resilin, Cpr100A, Cpr97Eb, Cpr92F, Cpr78Cc, Cpr66D, Cpr72Ec, Cpr73D, Cpr76Bd, Cpr64Ac, Cpr64Aa, Cpr62Bc
rhabdomere	TRUE	3	GO:0016028	rhabdomere	CC	25	5	0.69	7.31	2.9	0.00048	0.0021	ninaC, chp, inaC, inaD, rtp	boss, Tk
sensory perception of chemical stimulus	TRUE	1	GO:0007606	sensory perception of chemical stimulus	BP	32	5	0.88	5.7	2.5	0.0015	0.0046	Obp19d, Obp83b, a10, Tk, antdh
oxidoreductase activity, acting on CH-OH group of donors	TRUE	1	GO:0016614	oxidoreductase activity, acting on CH-OH group of donors	MF	71	7	2	3.61	1.8	0.0029	0.0066	Pdh, CG9150, FASN1, CG7322, CG9512, antdh, Gmer
photoreceptor cell development	TRUE	2	GO:0042461	photoreceptor cell development	BP	62	5	1.7	2.95	1.6	0.026	0.047	eys, chp, boss, sbb, capt
cellular component assembly involved in morphogenesis	TRUE	1	GO:0010927	cellular component assembly involved in morphogenesis	BP	69	5	1.9	2.64	1.4	0.039	0.059	Mf, Cp15, Cp19, wupA, Ppcs
rhabdomere	FALSE	3	GO:0044463	cell projection part	CC	70	5	1.9	2.6	1.4	0.041		ninaC, chp, inaC, boss, inaD

## Sheet: Fat_WolDep Transcript
Primary	Is.primary	Terms.in.cluster	GO.ID	Term	Ontology	Annotated	Significant	Expected	Enrichment	log2Enrichment	Fisher	Primary.Fisher.adj	Genes	Genes.in.secondary
alpha-1,4-glucosidase activity	TRUE	5	GO:0004558	alpha-1,4-glucosidase activity	MF	13	5	0.22	23	4.5	1.5e-06	2.7e-05	Mal-A2, Mal-A1, Mal-A4, Mal-A7, Mal-A8	Amy-d, Amy-p, Gal
serine-type peptidase activity	TRUE	5	GO:0008236	serine-type peptidase activity	MF	250	33	4.3	7.7	2.9	2.5e-20	1.3e-18	Jon99Cii, Jon99Ciii, Jon99Ci, alphaTry, betaTry, deltaTry, epsilonTry, Ser6, Jon25Bi, Jon74E, CG6041, CG6048, CG8952, CG1304, Jon25Bii, CG11034, CG5045, CG3344, Jon65Aiii, CG18180, CG7542, CG16749, CG3734, yip7, CG30025, CG30031, CG30098, CG31821, CG32483, Jon65Aiv, CG30002, Phae1, Phae2	Kaz-m1, CG2681, CG12374, CG8773, CG31233
serine-type endopeptidase activity	TRUE	2	GO:0004252	serine-type endopeptidase activity	MF	230	28	3.9	7.2	2.8	1.6e-16	4.2e-15	Jon99Cii, Jon99Ciii, Jon99Ci, alphaTry, betaTry, deltaTry, epsilonTry, Ser6, Jon25Bi, Jon74E, CG6041, CG6048, CG8952, CG1304, Jon25Bii, CG5045, Jon65Aiii, CG18180, CG7542, CG16749, yip7, CG30025, CG30031, CG30098, Jon65Aiv, CG30002, Phae1, Phae2
lipid catabolic process	TRUE	2	GO:0016042	lipid catabolic process	BP	80	7	1.4	5.2	2.4	0.0004	0.0053	CG17544, Jheh3, CG10116, CG6296, CG6295, CG17192, CG6283	CG18609, eloF, Tk
exopeptidase activity	TRUE	1	GO:0008238	exopeptidase activity	MF	96	7	1.6	4.3	2.1	0.0012	0.013	CG11034, CG12374, CG3344, CG8773, CG31233, CG31821, CG32483
carbohydrate binding	TRUE	1	GO:0030246	carbohydrate binding	MF	92	6	1.6	3.8	1.9	0.0047	0.035	Sr-CI, Lectin-galC1, GNBP-like3, lectin-28C, lectin-24Db, CG43055
defense response to bacterium	TRUE	7	GO:0042742	defense response to bacterium	BP	200	10	3.3	3	1.6	0.0019	0.016	Pp1alpha-96A, Sr-CI, Rab14, Lectin-galC1, spheroide, Pebp1, CG30098, NUCB1, nub, CG43055	Glt, GNBP-like3, CG10433, IM4
carbohydrate metabolic process	TRUE	1	GO:0005975	carbohydrate metabolic process	BP	390	14	6.6	2.1	1.1	0.0069	0.045	Ald, Amy-d, Amy-p, Gal, Mal-A2, Mal-A1, Mal-A4, Mal-A7, Mal-A8, CG6910, Adgf-A, Mal-A6, NUCB1, serp
