# Supplementary material for: Tissue-specific modulation of gene expression in response to lowered insulin signalling in Drosophila
Source: eLife. 2021 Apr 21;10:e67275. doi: 10.7554/eLife.67275 (PMC8060030; doi:10.7554/eLife.67275)
Supplement: Supplementary file 7. — Columns listed as: Flybase ID, Symbol (Gene), Cluster (related to Figure 2), abl (regulated in the mNSC-ablation model [Tain et al., 2017]), dilp (regulated in dilp2-3,5 v wDah), int (integrated responses between regulation in mNSC-ablation and dilp2-3,5 models). [file elife-67275-supp7.xlsx]

## Sheet: Sheet1
flybase	symbol	cluster	abl_fat	dilp_fat	int_fat	abl_gut	dilp_gut	int_gut	abl_brain	dilp_brain	int_brain	abl_th	dilp_th	int_th
FBgn0000045	Act79B	1	0.84976	0.597278	0.597278	1.53951	0.426882	0.426882	1.55257	2.85474	1.55257	2.19925	6.06967	2.19925
FBgn0000053	Gart	1	3.67928	1.19369	1.19369	1.41894	1.39855	1.39855	0	3.024	0	2.31244	0.913264	0.913264
FBgn0000100	RpLP0	1	4.56905	0.76137	0.76137	1.3144	1.19169	1.19169	0.378543	1.7058	0.378543	2.17929	1.7992	1.7992
FBgn0000253	Cam	1	2.24141	1.06206	1.06206	0.253795	3.54429	0.253795	2.77309	1.57531	1.57531	1.8277	1.49264	1.49264
FBgn0001091	Gapdh1	1	3.96727	0.648871	0.648871	0.864943	1.69869	0.864943	1.13114	3.56596	1.13114	1.03081	0.516142	0.516142
FBgn0001942	eIF4A	1	2.62313	1.19185	1.19185	2.04952	1.30848	1.30848	1.17396	1.92868	1.17396	2.1382	1.95482	1.95482
FBgn0002031	l(2)37Cc	1	1.75433	0	0	0.519038	3.22586	0.519038	1.57365	1.7991	1.57365	2.68582	9.10197	2.68582
FBgn0002579	RpL36	1	4.02412	1.70844	1.70844	2.62071	1.0925	1.0925	0.394881	4.76641	0.394881	2.04153	1.77924	1.77924
FBgn0002590	RpS5a	1	2.74562	0.619108	0.619108	2.13264	1.72474	1.72474	0.603482	1.81409	0.603482	1.65524	1.77561	1.65524
FBgn0002593	RpLP1	1	3.47169	1.11357	1.11357	1.6691	3.31622	1.6691	0.0354648	2.99817	0.0354648	3.05419	2.88284	2.88284
FBgn0002607	RpL19	1	4.229	0.624982	0.624982	2.68335	1.06213	1.06213	0.082802	2.19337	0.082802	3.04852	2.77921	2.77921
FBgn0002622	RpS3	1	3.38153	1.43334	1.43334	1.30949	1.27686	1.27686	0.534943	2.0783	0.534943	1.60911	2.14201	1.60911
FBgn0002626	RpL32	1	3.15245	0.62355	0.62355	1.23382	2.46519	1.23382	0.0269593	2.77388	0.0269593	2.33869	3.6932	2.33869
FBgn0003274	RpLP2	1	2.357	2.18982	2.18982	1.93895	2.70522	1.93895	0.207438	2.27084	0.207438	3.64987	1.85021	1.85021
FBgn0003279	RpL4	1	2.39955	1.32453	1.32453	2.16851	1.17908	1.17908	0.169337	2.06788	0.169337	3.2481	2.74451	2.74451
FBgn0003517	sta	1	2.52213	0.645801	0.645801	2.30997	1.97726	1.97726	0.182042	2.39127	0.182042	2.95517	2.05079	2.05079
FBgn0003942	RpS27A	1	3.01535	1.71461	1.71461	1.73274	1.06639	1.06639	0.0966338	3.75093	0.0966338	2.15446	2.67326	2.15446
FBgn0004403	RpS14a	1	2.67404	0.7203	0.7203	1.32488	1.41442	1.32488	0	3.66488	0	1.78174	3.65978	1.78174
FBgn0004867	RpS2	1	4.6142	0.718192	0.718192	1.86924	2.29572	1.86924	0.759625	1.72608	0.759625	1.51829	2.99207	1.51829
FBgn0004907	14-3-3zeta	1	3.07424	1.42026	1.42026	1.72734	2.28016	1.72734	2.63706	4.32385	2.63706	4.90863	1.85703	1.85703
FBgn0004926	eIF2beta	1	2.33115	1.26373	1.26373	1.41376	2.67273	1.41376	0.561886	1.82389	0.561886	2.22114	1.88333	1.88333
FBgn0005533	RpS17	1	2.46085	0.840069	0.840069	2.26872	1.15827	1.15827	0.076918	2.03248	0.076918	1.91151	2.13471	1.91151
FBgn0005593	RpL7	1	4.13278	0.689829	0.689829	1.39646	1.35435	1.35435	0.328449	1.77737	0.328449	1.59078	1.75247	1.59078
FBgn0010078	RpL23	1	2.33969	2.13072	2.13072	1.26873	1.29027	1.26873	0.456973	2.31068	0.456973	3.12199	4.8074	3.12199
FBgn0010198	RpS15Aa	1	3.54548	0.807365	0.807365	1.44639	2.90261	1.44639	1.69169	2.43968	1.69169	1.59594	3.51979	1.59594
FBgn0010217	ATPsynbeta	1	3.91562	0.113279	0.113279	0.891528	2.79889	0.891528	1.34314	1.37247	1.34314	2.08057	1.30735	1.30735
FBgn0010265	RpS13	1	2.72871	1.31696	1.31696	1.32814	2.06395	1.32814	0.0191956	2.02668	0.0191956	1.5198	1.99539	1.5198
FBgn0010408	RpS9	1	4.931	0.668373	0.668373	1.29284	1.05683	1.05683	0.147121	1.73878	0.147121	1.54667	2.03493	1.54667
FBgn0010409	RpL18A	1	3.6786	0.625389	0.625389	2.21296	1.08572	1.08572	0.0914656	2.81933	0.0914656	1.54875	2.32091	1.54875
FBgn0010411	RpS18	1	2.90977	0.704295	0.704295	1.2797	1.08182	1.08182	0.16439	3.27494	0.16439	2.10388	1.67923	1.67923
FBgn0010612	ATPsynG	1	1.93752	1.06888	1.06888	1.0768	3.0582	1.0768	1.13208	1.40557	1.13208	2.01211	1.62511	1.62511
FBgn0011016	SsRbeta	1	1.44644	1.48236	1.44644	2.01537	2.37447	2.01537	0.330776	0.173513	0.173513	3.10965	1.79682	1.79682
FBgn0011211	blw	1	2.18336	0.0868784	0.0868784	0.761745	3.32505	0.761745	1.05628	2.21218	1.05628	1.22537	1.51179	1.22537
FBgn0011272	RpL13	1	3.88117	0.584561	0.584561	2.55152	1.116	1.116	0.149826	2.7433	0.149826	2.6677	2.80849	2.6677
FBgn0011284	RpS4	1	4.46201	0.879705	0.879705	2.5349	2.00734	2.00734	0.69064	2.81005	0.69064	2.29093	2.19971	2.19971
FBgn0011361	ND-ACP	1	4.13007	0.000223445	0.000223445	1.36879	3.67007	1.36879	2.34711	2.62774	2.34711	3.26827	1.7531	1.7531
FBgn0011455	ND-SGDH	1	2.54674	0.0658584	0.0658584	0.912974	2.33934	0.912974	2.33981	3.35691	2.33981	4.44063	2.06309	2.06309
FBgn0013325	RpL11	1	2.5258	0.646515	0.646515	1.86242	1.19375	1.19375	0.207131	2.70557	0.207131	1.51518	1.88605	1.51518
FBgn0013678	mt:Cyt-b	1	2.65729	0.0136716	0.0136716	1.58453	1.9715	1.58453	1.98253	3.31342	1.98253	1.60022	1.37756	1.37756
FBgn0014427	CG11899	1	0.902922	6.81423	0.902922	0.0596784	1.75697	0.0596784	0	6.99269	0	4.34404	3.46198	3.46198
FBgn0015031	cype	1	2.07937	0	0	2.641	4.55452	2.641	0.574977	1.1765	0.574977	4.06999	2.28535	2.28535
FBgn0015218	eIF4E1	1	4.70565	0.868914	0.868914	2.26399	1.20336	1.20336	1.93635	2.44455	1.93635	2.01771	1.94323	1.94323
FBgn0015282	Rpt2	1	2.26198	0.925801	0.925801	3.34057	1.20355	1.20355	0.0340126	2.90979	0.0340126	1.36197	2.27655	1.36197
FBgn0015288	RpL22	1	2.28841	0.953131	0.953131	1.29894	2.13467	1.29894	0.261478	3.07491	0.261478	2.61029	2.34838	2.34838
FBgn0015834	eIF3i	1	3.48395	0.73668	0.73668	1.76863	1.61965	1.61965	0.500303	2.16805	0.500303	1.75679	1.75542	1.75542
FBgn0016119	ATPsynCF6	1	2.97802	0.00210125	0.00210125	1.35148	4.23734	1.35148	1.69484	1.65205	1.65205	1.51662	2.17008	1.51662
FBgn0016120	ATPsynD	1	2.86275	0.064502	0.064502	1.49384	3.21621	1.49384	1.5734	2.83266	1.5734	1.74699	1.66442	1.66442
FBgn0016726	RpL29	1	4.7167	1.75004	1.75004	3.25479	4.16599	3.25479	0.557718	1.86075	0.557718	2.04135	1.73123	1.73123
FBgn0017545	RpS3A	1	2.89264	1.49482	1.49482	2.29964	1.0682	1.0682	0.0894743	2.62094	0.0894743	2.48247	1.75085	1.75085
FBgn0017566	ND-75	1	2.56835	0.351627	0.351627	1.5027	3.29182	1.5027	1.65187	1.54601	1.54601	1.71673	2.01461	1.71673
FBgn0017579	RpL14	1	4.02087	0.614781	0.614781	1.53014	1.28871	1.28871	0	2.2812	0	2.4676	2.65695	2.4676
FBgn0019624	COX5A	1	2.75798	0.190011	0.190011	1.75838	3.51235	1.75838	0.619341	1.82128	0.619341	0.999752	1.35919	0.999752
FBgn0019644	ATPsynB	1	1.98642	0.0146299	0.0146299	2.66626	3.35453	2.66626	3.32592	2.79215	2.79215	2.69416	1.74204	1.74204
FBgn0019936	RpS20	1	4.00796	0.797773	0.797773	1.83154	1.20571	1.20571	0.125089	3.46034	0.125089	2.46708	1.8581	1.8581
FBgn0019957	ND-42	1	1.89146	0.362204	0.362204	1.03467	2.15307	1.03467	2.90704	1.6464	1.6464	2.01855	1.97721	1.97721
FBgn0020235	ATPsyngamma	1	2.68909	0.957788	0.957788	1.1009	2.07586	1.1009	2.22081	1.4882	1.4882	1.39582	2.43802	1.39582
FBgn0020513	Paics	1	1.69974	4.00614	1.69974	2.72712	0.906492	0.906492	0	5.88258	0	3.83213	2.95717	2.95717
FBgn0020910	RpL3	1	5.09017	0.629004	0.629004	1.30483	1.77135	1.30483	0.519207	1.89139	0.519207	3.34121	3.06323	3.06323
FBgn0021765	scu	1	1.08418	2.9934	1.08418	0.196236	3.54366	0.196236	0	2.11185	0	1.39208	3.39584	1.39208
FBgn0021906	RFeSP	1	2.93891	0.0806502	0.0806502	2.3326	2.38096	2.3326	1.43226	1.44328	1.43226	1.62387	2.44324	1.62387
FBgn0021967	ND-PDSW	1	2.17732	0.189883	0.189883	2.36931	3.922	2.36931	1.28098	2.32738	1.28098	2.24149	2.90649	2.24149
FBgn0022023	eIF3h	1	2.58674	0.608572	0.608572	2.09227	2.0497	2.0497	0.289341	2.20045	0.289341	1.69898	2.24584	1.69898
FBgn0022355	Tsf1	1	3.28819	2.51945	2.51945	0	0	0	1.10008	1.16862	1.10008	1.97443	11.7614	1.97443
FBgn0022359	Sodh-2	1	7.9498	5.27033	5.27033	0	0.393444	0	5.82062	2.4678	2.4678	5.21796	5.32035	5.21796
FBgn0022959	yps	1	2.66318	0.0175882	0.0175882	1.74626	2.56064	1.74626	2.347	2.35147	2.347	1.06855	0.260181	0.260181
FBgn0023213	eIF4G1	1	3.00357	1.20417	1.20417	1.96399	1.28982	1.28982	0.51359	2.39944	0.51359	1.99606	2.99317	1.99606
FBgn0024289	Sodh-1	1	7.27369	4.03069	4.03069	0	0.794973	0	5.1599	2.53001	2.53001	5.12171	4.96782	4.96782
FBgn0024366	CG11409	1	1.15202	4.99971	1.15202	0	0	0	0	0	0	0	9.17912	0
FBgn0025286	RpL31	1	2.58458	1.8481	1.8481	1.83586	1.27209	1.27209	0.295481	2.94441	0.295481	2.21072	1.74835	1.74835
FBgn0025582	eIF3e	1	3.73513	0.697621	0.697621	1.31063	1.72593	1.31063	0.302651	1.7567	0.302651	2.07267	2.84738	2.07267
FBgn0025839	ND-B14.5A	1	2.02755	0.0769829	0.0769829	2.76632	3.56727	2.76632	1.53778	3.69678	1.53778	1.31218	2.63879	1.31218
FBgn0026259	eIF5B	1	1.91058	0.573379	0.573379	1.61574	1.13818	1.13818	0.197443	2.61581	0.197443	1.18218	1.32786	1.18218
FBgn0026372	RpL23A	1	3.97165	0.681539	0.681539	1.59134	1.14282	1.14282	0.212537	1.83355	0.212537	2.85833	3.42798	2.85833
FBgn0027494	RpS10a	1	5.24713	0.58546	0.58546	1.25724	1.94704	1.25724	0.239525	2.91215	0.239525	1.38191	2.02677	1.38191
FBgn0027619	eIF3j	1	2.52139	1.33876	1.33876	1.46331	1.39686	1.39686	0.136184	1.82482	0.136184	1.75731	2.23107	1.75731
FBgn0028342	ATPsyndelta	1	5.99899	0.015606	0.015606	2.78323	4.71063	2.78323	2.3659	3.81381	2.3659	4.40083	1.8129	1.8129
FBgn0028479	Mtpalpha	1	4.20567	1.54734	1.54734	0.692866	1.50912	0.692866	0.645301	3.47827	0.645301	1.26206	2.43183	1.26206
FBgn0028684	Rpt5	1	1.12522	1.00665	1.00665	2.31605	2.10909	2.10909	0.199784	2.03222	0.199784	3.33436	1.17871	1.17871
FBgn0028689	Rpn6	1	1.91355	0.541092	0.541092	2.00492	0.912346	0.912346	0.133699	1.89008	0.133699	1.47237	1.09072	1.09072
FBgn0029176	eEF1gamma	1	1.58157	0.408558	0.408558	1.80332	1.70171	1.70171	0.438484	2.8474	0.438484	1.67139	1.5795	1.5795
FBgn0029629	eIF3g1	1	3.08615	0.868919	0.868919	1.38438	1.21788	1.21788	0.0399888	2.63661	0.0399888	1.59913	2.71972	1.59913
FBgn0029785	RpL35	1	4.17259	0.63185	0.63185	1.30979	1.11903	1.11903	0	3.62749	0	1.56937	3.72623	1.56937
FBgn0029823	Shmt	1	1.76108	3.2461	1.76108	0.296871	0	0	0	4.28755	0	2.81794	5.41227	2.81794
FBgn0029868	ND-B16.6	1	5.3441	0.0587458	0.0587458	1.07783	2.13526	1.07783	1.17358	1.51283	1.17358	1.71673	4.98073	1.71673
FBgn0029888	ND-ASHI	1	1.95315	0.311069	0.311069	1.63043	3.28287	1.63043	1.97075	1.72082	1.72082	1.54624	3.30796	1.54624
FBgn0030571	CG14414	1	0.0918904	3.04326	0.0918904	0.128579	2.93231	0.128579	0.295264	2.85318	0.295264	1.22631	5.57413	1.22631
FBgn0030605	ND-B18	1	2.19218	0.597574	0.597574	1.57452	2.57642	1.57452	1.1274	2.29917	1.1274	3.69068	1.9522	1.9522
FBgn0030616	RpL37a	1	3.94198	1.62062	1.62062	3.37668	1.85414	1.85414	0.0226894	2.44869	0.0226894	1.41714	2.6899	1.41714
FBgn0030719	eIF5	1	2.39992	1.11267	1.11267	2.16139	1.27115	1.27115	0.0511213	2.48066	0.0511213	1.47476	1.72246	1.47476
FBgn0030733	UQCR-14	1	2.08723	0.596507	0.596507	1.4851	2.30858	1.4851	1.21404	2.73552	1.21404	2.36541	3.22697	2.36541
FBgn0030853	ND-24	1	2.66005	0.125789	0.125789	1.92021	2.79401	1.92021	1.63066	1.65705	1.63066	2.31894	2.84032	2.31894
FBgn0030968	CG7322	1	0	4.42856	0	0.26766	1.73479	0.26766	0	3.36039	0	2.08233	4.08743	2.08233
FBgn0031436	ND-B17.2	1	1.95737	0.633547	0.633547	2.46498	3.07501	2.46498	1.08109	1.57499	1.08109	1.91893	1.91061	1.91061
FBgn0031505	ND-B14.5B	1	2.22852	0.0608307	0.0608307	1.87224	2.54357	1.87224	1.17183	1.499	1.17183	1.37038	1.99695	1.37038
FBgn0031771	ND-51	1	2.36475	0.589287	0.589287	1.2249	3.39788	1.2249	2.91106	3.99322	2.91106	2.05028	1.85139	1.85139
FBgn0032350	CG6287	1	1.71546	2.17014	1.71546	1.85091	0.628512	0.628512	0	4.76499	0	4.56929	6.47909	4.56929
FBgn0032518	RpL24	1	2.55555	1.0502	1.0502	1.25616	1.04273	1.04273	0.0565432	1.62068	0.0565432	3.78602	2.68677	2.68677
FBgn0032833	COX4	1	5.82676	0.206703	0.206703	1.781	1.78329	1.781	0.808007	1.71395	0.808007	1.9597	1.82232	1.82232
FBgn0032945	CG8665	1	0.564138	5.80807	0.564138	0.679632	5.61248	0.679632	1.0225	5.48929	1.0225	2.52557	10.167	2.52557
FBgn0032987	RpL21	1	2.85361	0.638457	0.638457	1.58814	3.36059	1.58814	0.0735193	1.6962	0.0735193	2.92679	2.49559	2.49559
FBgn0033570	ND-B14	1	2.0256	0.372364	0.372364	1.04835	3.94879	1.04835	1.80135	2.71651	1.80135	1.61741	1.61776	1.61741
FBgn0033717	CG8839	1	1.99999	3.91804	1.99999	0.579627	2.43182	0.579627	2.59113	2.43682	2.43682	2.44735	7.23652	2.44735
FBgn0033912	RpS23	1	3.49266	0.79597	0.79597	2.79625	1.24274	1.24274	0.0233204	4.02738	0.0233204	1.39397	3.392	1.39397
FBgn0034138	RpS15	1	2.45918	0.630164	0.630164	3.8296	1.50738	1.50738	0.221727	1.90949	0.221727	3.24103	2.30495	2.30495
FBgn0034237	eIF3b	1	5.263	1.28915	1.28915	1.42785	1.23316	1.23316	0	2.00603	0	1.48528	2.01975	1.48528
FBgn0034258	eIF3c	1	3.18996	0.81178	0.81178	1.83424	2.62425	1.83424	0.216618	3.10634	0.216618	1.49796	2.66371	1.49796
FBgn0034356	CG10924	1	2.49441	2.27781	2.27781	4.30404	2.74943	2.74943	0.695904	0.829567	0.695904	1.16247	3.8461	1.16247
FBgn0034468	Obp56a	1	0.531761	6.19267	0.531761	0	0	0	0	0	0	0	12.1318	0
FBgn0034576	ND-B14.7	1	1.13773	3.16516	1.13773	0.823855	3.21257	0.823855	1.8092	2.85318	1.8092	3.48997	5.9491	3.48997
FBgn0034645	ND-B12	1	1.97615	0.0261439	0.0261439	0.852663	5.66367	0.852663	1.12034	3.53292	1.12034	1.56088	2.12674	1.56088
FBgn0034877	levy	1	1.71885	0.761791	0.761791	1.9164	4.1179	1.9164	0.538209	1.16223	0.538209	1.23588	1.53834	1.23588
FBgn0035032	ATPsynF	1	1.97147	1.65314	1.65314	2.63853	4.54494	2.63853	1.07039	2.36793	1.07039	1.51481	2.38934	1.51481
FBgn0035046	ND-19	1	2.40495	0.0874986	0.0874986	1.4179	3.55679	1.4179	1.40087	2.27291	1.40087	2.56312	3.84983	2.56312
FBgn0035422	RpL28	1	5.37819	0.683582	0.683582	1.25112	2.35646	1.25112	0.155424	3.41999	0.155424	1.57258	4.48436	1.57258
FBgn0035600	Cyt-c1	1	2.58287	1.00611	1.00611	2.15463	2.74904	2.15463	1.99839	2.19251	1.99839	1.48888	4.51066	1.48888
FBgn0035753	RpL18	1	3.44063	0.580306	0.580306	1.55762	1.4157	1.4157	0.9797	2.15716	0.9797	2.01373	2.81431	2.01373
FBgn0036213	RpL10Ab	1	2.58446	0.675779	0.675779	1.84911	1.23433	1.23433	0.270308	1.61853	0.270308	2.22422	1.89989	1.89989
FBgn0036702	CG6512	1	1.10058	0	0	0.115393	1.60192	0.115393	1.60701	1.3389	1.3389	1.7275	7.38784	1.7275
FBgn0036762	CG7430	1	2.41601	0.508555	0.508555	0.912747	3.12178	0.912747	2.07484	2.0813	2.07484	1.63618	2.65726	1.63618
FBgn0036825	RpL26	1	5.41845	0.601244	0.601244	1.42107	2.18107	1.42107	0.389892	2.84083	0.389892	2.8312	3.46201	2.8312
FBgn0037001	ND-39	1	2.91293	0.0426583	0.0426583	1.4245	3.00794	1.4245	3.30001	1.70769	1.70769	1.73407	1.84516	1.73407
FBgn0037146	CG7470	1	0.153547	1.10431	0.153547	0.945739	3.2465	0.945739	0.0281549	4.47611	0.0281549	3.88002	4.15985	3.88002
FBgn0037270	eIF3f1	1	2.42038	1.3424	1.3424	1.53652	1.21623	1.21623	0.539259	1.99674	0.539259	1.40253	1.6713	1.40253
FBgn0037328	RpL35A	1	2.97257	1.48436	1.48436	3.90439	1.33894	1.33894	0.162189	1.86218	0.162189	1.51347	3.14608	1.51347
FBgn0037351	RpL13A	1	3.37611	1.93024	1.93024	2.8828	2.21794	2.21794	0.478052	2.22278	0.478052	1.8457	4.35142	1.8457
FBgn0037891	CG5214	1	1.98866	0.256489	0.256489	0.76613	4.24974	0.76613	0.786789	4.02542	0.786789	0.983737	1.35536	0.983737
FBgn0038467	AdSL	1	1.10072	1.81946	1.10072	2.57894	2.10994	2.10994	0	4.42979	0	2.70225	2.46761	2.46761
FBgn0038834	RpS30	1	4.65297	0.954125	0.954125	3.52002	1.09017	1.09017	0.0923764	1.70406	0.0923764	1.87499	2.01748	1.87499
FBgn0039114	Lsd-1	1	4.14919	0.617777	0.617777	2.40948	0.458499	0.458499	0.91733	5.13183	0.91733	4.31423	4.11571	4.11571
FBgn0039241	CG11089	1	1.56111	3.16642	1.56111	0.968562	0.850432	0.850432	0.50965	6.64186	0.50965	2.91529	2.73915	2.73915
FBgn0039341	CG5112	1	1.45504	5.14095	1.45504	0.710558	2.14998	0.710558	1.96788	1.74246	1.74246	2.88996	5.612	2.88996
FBgn0039359	RpL27	1	3.42715	0.610905	0.610905	3.85719	1.49405	1.49405	0.255893	2.56453	0.255893	2.98184	2.12714	2.12714
FBgn0039406	RpL34a	1	2.272	0.542857	0.542857	1.48409	1.99205	1.48409	0.267599	3.68565	0.267599	1.54024	1.67684	1.54024
FBgn0039713	RpS8	1	3.4637	1.63164	1.63164	2.24218	1.27895	1.27895	0.0225709	2.73514	0.0225709	1.91079	2.86222	1.91079
FBgn0039757	RpS7	1	2.86007	1.24035	1.24035	1.70682	1.03897	1.03897	0.185224	2.80342	0.185224	1.60694	2.41416	1.60694
FBgn0039857	RpL6	1	2.5187	0.912853	0.912853	1.50856	2.03412	1.50856	0.0418394	2.95804	0.0418394	4.99316	2.52314	2.52314
FBgn0039909	ND-49	1	2.14947	1.00469	1.00469	1.0522	3.25592	1.0522	3.31866	1.50574	1.50574	1.48165	1.55184	1.48165
FBgn0040007	RpL38	1	2.81605	0.582914	0.582914	2.2609	1.0405	1.0405	0.00681535	1.68967	0.00681535	1.83593	3.03902	1.83593
FBgn0040070	Trx-2	1	1.59221	0.590425	0.590425	2.95426	1.96608	1.96608	0.421277	1.27578	0.421277	1.53333	2.43071	1.53333
FBgn0040227	eIF3d1	1	2.59035	0.745868	0.745868	1.41423	1.37896	1.37896	0	1.92722	0	1.80354	2.65554	1.80354
FBgn0040529	COX7A	1	1.66284	0.344585	0.344585	1.39874	2.64415	1.39874	2.09805	1.13363	1.13363	1.82603	2.41934	1.82603
FBgn0052230	ND-MLRQ	1	2.48647	0.845881	0.845881	1.07688	4.42127	1.07688	1.05707	1.69029	1.05707	1.99257	2.19285	1.99257
FBgn0086472	RpS25	1	4.24111	0.900812	0.900812	2.5746	1.80985	1.80985	0	3.70084	0	1.86129	2.75785	1.86129
FBgn0086710	RpL30	1	2.3659	0.71511	0.71511	3.64734	2.34865	2.34865	0.52383	1.76753	0.52383	2.7945	1.74687	1.74687
FBgn0250814	UQCR-C2	1	4.79071	0.0825741	0.0825741	1.36636	3.75103	1.36636	1.20783	2.99309	1.20783	1.72606	1.73469	1.72606
FBgn0259139	glo	1	2.00564	0.750337	0.750337	3.62581	1.91503	1.91503	3.27317	3.22197	3.22197	0.991304	1.52235	0.991304
FBgn0260441	RpS12	1	3.43044	0.61325	0.61325	3.82616	1.29207	1.29207	1.35828	2.33795	1.35828	2.57205	1.87094	1.87094
FBgn0261593	RpS10b	1	3.30111	1.04862	1.04862	2.37789	3.84069	2.37789	0.00391399	4.30357	0.00391399	2.27446	1.7529	1.7529
FBgn0261596	RpS24	1	3.54437	0.972693	0.972693	1.4346	2.88595	1.4346	0.144988	3.44654	0.144988	1.92474	1.70093	1.70093
FBgn0261597	RpS26	1	3.20236	1.00892	1.00892	2.1576	1.43878	1.43878	2.28032	2.37506	2.28032	1.61252	2.29768	1.61252
FBgn0261602	RpL8	1	4.19761	1.15477	1.15477	1.36012	2.44208	1.36012	0.0514695	1.72065	0.0514695	1.60077	2.79608	1.60077
FBgn0261606	RpL27A	1	2.71519	0.592022	0.592022	1.29271	3.44095	1.29271	0.0458326	3.27074	0.0458326	1.76882	2.85898	1.76882
FBgn0261609	eIF2alpha	1	2.66219	0.917933	0.917933	2.12575	1.56432	1.56432	0	2.20501	0	4.96887	2.85912	2.85912
FBgn0262559	Mdh2	1	2.18818	0.111046	0.111046	1.10272	3.95487	1.10272	1.27141	1.32367	1.27141	1.12457	1.72677	1.12457
FBgn0262734	eIF4H1	1	2.34327	0.840835	0.840835	1.39886	1.77815	1.39886	1.17858	1.9708	1.17858	1.43811	1.68081	1.43811
FBgn0263121	Prosalpha1	1	1.87284	1.76451	1.76451	1.98524	2.05809	1.98524	0.736741	1.58558	0.736741	1.10759	2.26769	1.10759
FBgn0263231	bel	1	0.613343	0	0	0.574807	0.192309	0.192309	0.600855	0.213291	0.213291	1.77117	5.90874	1.77117
FBgn0264695	Mhc	1	2.08663	1.98904	1.98904	2.52271	3.51566	2.52271	4.83261	2.16677	2.16677	5.29378	4.45315	4.45315
FBgn0266582	ND-30	1	3.5127	0.142342	0.142342	2.01062	2.37319	2.01062	1.38522	2.55456	1.38522	1.38639	1.94372	1.38639
FBgn0001089	Gal	_4	1.25081	0.545153	0.545153	3.48462	3.34193	3.34193	0.391525	0.871528	0.391525	0	0	0
FBgn0001124	Got1	_4	1.666	2.59958	1.666	2.09257	2.81508	2.09257	3.49852	1.86605	1.86605	0.77439	1.90873	0.77439
FBgn0001145	Gs2	_4	0.227718	0.0960524	0.0960524	2.45924	1.76098	1.76098	2.46289	1.98164	1.98164	0.434664	1.93922	0.434664
FBgn0001233	Hsp83	_4	0.659499	1.95999	0.659499	1.9746	1.72291	1.72291	1.83143	2.03344	1.83143	1.838	2.01246	1.838
FBgn0002569	Mal-A2	_4	0	5.89986	0	2.89175	6.65911	2.89175	0	0	0	0	0.633414	0
FBgn0002570	Mal-A1	_4	0	4.88718	0	1.74258	6.92683	1.74258	0	0	0	0	0.716255	0
FBgn0002571	Mal-A3	_4	0	4.10831	0	2.48105	7.39595	2.48105	0	0	0	0	0.633414	0
FBgn0003261	Rm62	_4	0.990887	1.10213	0.990887	1.8892	1.83566	1.83566	2.64617	2.91912	2.64617	1.27585	0.672867	0.672867
FBgn0003676	CCT1	_4	0.284814	3.11483	0.284814	3.70085	2.27187	2.27187	3.26463	1.16722	1.16722	2.5484	0.809091	0.809091
FBgn0003721	Tm1	_4	0.44423	0.134408	0.134408	3.90064	2.85707	2.85707	3.07413	0.130259	0.130259	0.626253	2.38411	0.626253
FBgn0003885	alphaTub84D	_4	2.40823	2.26703	2.26703	3.05717	0.444435	0.444435	3.45777	2.5443	2.5443	1.23361	0.624465	0.624465
FBgn0004117	Tm2	_4	2.32154	0.366665	0.366665	2.8307	3.05966	2.8307	4.88306	0.838761	0.838761	1.56205	2.17595	1.56205
FBgn0004169	up	_4	1.21604	0.720916	0.720916	2.28268	2.58224	2.28268	4.95251	2.07791	2.07791	1.95786	3.76493	1.95786
FBgn0004512	Mdr49	_4	0	0	0	4.39964	2.34142	2.34142	3.26067	1.37525	1.37525	0	0	0
FBgn0004513	Mdr65	_4	0	0	0	2.53477	1.71445	1.71445	5.31011	2.92259	2.92259	0	0	0
FBgn0004888	Scsalpha	_4	1.27413	1.45782	1.27413	1.54881	0.861267	0.861267	0.649983	4.1518	0.649983	0.232719	2.61462	0.232719
FBgn0005278	Sam-S	_4	0.403502	1.03987	0.403502	1.07188	1.03943	1.03943	0.699	4.36859	0.699	0.497791	4.27703	0.497791
FBgn0010241	Mdr50	_4	0	0	0	4.95003	3.77269	3.77269	3.26067	1.37525	1.37525	0	0	0
FBgn0010621	CCT5	_4	0.429301	4.13755	0.429301	2.00466	2.71467	2.00466	3.13062	0.989749	0.989749	2.02773	0.303442	0.303442
FBgn0015019	CCT3	_4	0.0225517	3.58027	0.0225517	2.21284	2.96089	2.21284	3.29327	1.15642	1.15642	4.40075	0.159859	0.159859
FBgn0016041	Tom40	_4	0.0715984	0.745151	0.0715984	2.75916	2.51019	2.51019	3.70613	0.398925	0.398925	0.715777	1.0625	0.715777
FBgn0016685	Nlp	_4	0.0163429	3.3634	0.0163429	0.99503	1.31859	0.99503	2.93501	1.98524	1.98524	0.882908	0.576797	0.576797
FBgn0016697	Prosalpha5	_4	0.862745	0.742469	0.742469	3.10421	1.91141	1.91141	0.734644	1.86711	0.734644	1.06628	0.597394	0.597394
FBgn0025725	alphaCOP	_4	1.82745	2.12152	1.82745	2.76618	2.83572	2.76618	2.62606	1.23093	1.23093	0.607954	1.5583	0.607954
FBgn0026150	ApepP	_4	1.14468	0	0	2.08132	2.95937	2.08132	0.815179	0.47127	0.47127	0.765503	0.858727	0.765503
FBgn0027329	CCT6	_4	0.84781	2.89289	0.84781	4.56363	3.96248	3.96248	1.83625	1.46206	1.46206	2.28094	0.506719	0.506719
FBgn0027580	PCB	_4	0.775561	2.49069	0.775561	1.93766	1.73222	1.73222	2.68029	1.68322	1.68322	1.06672	1.03082	1.03082
FBgn0027590	GstE12	_4	0	1.33361	0	0.525441	4.9545	0.525441	0.369338	3.76601	0.369338	0	3.40437	0
FBgn0027601	pdgy	_4	0.728241	0	0	1.39614	3.32495	1.39614	1.09385	0	0	0.650158	1.89238	0.650158
FBgn0027610	Dic1	_4	0.814799	0.313106	0.313106	3.77954	2.00527	2.00527	0.516123	1.56132	0.516123	0.667563	1.04821	0.667563
FBgn0027611	LManII	_4	2.72501	0.662865	0.662865	2.96152	2.89438	2.89438	1.91836	0.713649	0.713649	0.503775	0.0896115	0.0896115
FBgn0027657	glob1	_4	0.701567	3.29456	0.701567	3.45645	3.14661	3.14661	0	3.81123	0	0.9042	3.40104	0.9042
FBgn0028646	aralar1	_4	1.73909	1.97712	1.73909	2.55961	0.68446	0.68446	2.82272	2.17615	2.17615	0.78577	1.47644	0.78577
FBgn0028969	deltaCOP	_4	0.639811	1.42292	0.639811	1.93676	2.20364	1.93676	0.605079	2.68666	0.605079	0.0105007	0.645389	0.0105007
FBgn0029118	Sucb	_4	0.363371	0.347456	0.347456	2.04636	0.659771	0.659771	0.362067	4.50665	0.362067	1.00872	4.09751	1.00872
FBgn0029155	Men-b	_4	0.50303	1.66904	0.50303	2.67101	2.83711	2.67101	2.95222	0.272738	0.272738	1.13786	3.91267	1.13786
FBgn0029979	mahe	_4	0.59048	0.29446	0.29446	2.03273	1.51203	1.51203	2.21487	2.13703	2.13703	0.377118	0.218604	0.218604
FBgn0031913	CG5958	_4	0.902951	0	0	4.33724	2.59747	2.59747	0	6.55709	0	0	4.71978	0
FBgn0032068	LManV	_4	0	0.501303	0	5.17509	4.89466	4.89466	0	0	0	0	0	0
FBgn0032069	LManVI	_4	0.0786291	0.15531	0.0786291	4.68142	4.67117	4.67117	0	0	0	0	0	0
FBgn0032381	Mal-B1	_4	0	4.12303	0	1.19069	4.85801	1.19069	0	0	0	0	2.18578	0
FBgn0032382	Mal-B2	_4	0	5.84919	0	1.19069	4.81018	1.19069	0	1.07286	0	0	1.24922	0
FBgn0032444	CCT4	_4	0.36034	3.08597	0.36034	4.93464	1.73677	1.73677	3.36838	0.435357	0.435357	1.69784	1.86145	1.69784
FBgn0032646	mEFTs	_4	0.266456	0	0	2.25482	2.27007	2.25482	1.28035	0.481159	0.481159	0.963686	1.38166	0.963686
FBgn0033246	ACC	_4	0.915993	1.24861	0.915993	2.09889	1.91128	1.91128	2.54762	0.772093	0.772093	0.915338	2.2323	0.915338
FBgn0033272	RagC-D	_4	0.206514	0	0	3.43097	2.45181	2.45181	0.00438119	1.16906	0.00438119	1.06303	1.25486	1.06303
FBgn0033294	Mal-A4	_4	0	4.10831	0	1.52101	5.64556	1.52101	0	0	0	0	0.633414	0
FBgn0033296	Mal-A7	_4	0	5.72942	0	2.01843	7.60772	2.01843	0	0	0	0	0.633414	0
FBgn0033297	Mal-A8	_4	0	5.98926	0	1.35762	6.61889	1.35762	0	0	0	0	0.633414	0
FBgn0033381	GstE13	_4	0	1.34538	0	1.03437	4.04277	1.03437	0.727128	2.95614	0.727128	0.206468	1.49548	0.206468
FBgn0034059	CG8320	_4	4.10373	0	0	4.71097	2.51044	2.51044	0	0	0	0	0	0
FBgn0034335	GstE1	_4	0	2.65805	0	0.517824	6.5436	0.517824	0.484875	5.66217	0.484875	0	4.39972	0
FBgn0034354	GstE11	_4	0.249261	4.04551	0.249261	1.30562	5.22887	1.30562	0.80676	3.4387	0.80676	0	2.20155	0
FBgn0034488	CG11208	_4	0	0.469	0	1.56343	2.80726	1.56343	0.688571	2.41662	0.688571	0	0.0519649	0
FBgn0034552	CG17999	_4	0	0	0	2.43847	5.90505	2.43847	0	0	0	0	0	0
FBgn0034553	CG9993	_4	0	0	0	2.6311	7.02845	2.6311	0	0	0	0	0	0
FBgn0035203	CG9149	_4	0	0	0	1.80571	1.86462	1.80571	2.14166	0.458015	0.458015	1.205	0.927629	0.927629
FBgn0035473	mge	_4	0.464529	0.977777	0.464529	2.01672	3.05195	2.01672	1.04288	0.167645	0.167645	1.08331	0.949954	0.949954
FBgn0035603	Pfdn4	_4	0.200594	0.622106	0.200594	2.79011	1.12586	1.12586	3.53103	1.29496	1.29496	0.876852	0.986762	0.876852
FBgn0035695	CG10226	_4	0	0	0	2.8497	2.46384	2.46384	5.43008	2.19563	2.19563	0	0.372119	0
FBgn0035720	CG10077	_4	0.428404	0.306573	0.306573	1.57229	2.28064	1.57229	2.83021	2.4493	2.4493	0.407144	0.439755	0.407144
FBgn0035763	CG8602	_4	0.0321264	0	0	1.51664	3.20158	1.51664	1.46763	2.11635	1.46763	0	0	0
FBgn0036906	CG14102	_4	0.495062	0	0	3.2138	1.83541	1.83541	0	4.99358	0	0	3.59865	0
FBgn0037387	CG1213	_4	0.25749	0.917507	0.25749	1.13161	1.98041	1.13161	0	2.43134	0	0	0.30221	0
FBgn0037562	CG11671	_4	5.4139	0	0	6.20876	3.44128	3.44128	0	0	0	0	0	0
FBgn0037632	CCT7	_4	0.179033	2.76517	0.179033	4.18909	3.4998	3.4998	3.43703	1.02841	1.02841	4.0688	0.222054	0.222054
FBgn0037643	skap	_4	1.99392	1.23047	1.23047	1.45129	1.24174	1.24174	0.978082	2.82127	0.978082	0.222693	1.77742	0.222693
FBgn0038136	CG8774	_4	0	0	0	4.44697	5.7057	4.44697	0	0	0	0	1.2102	0
FBgn0038738	CG4572	_4	0.101414	1.12101	0.101414	1.20626	2.8153	1.20626	1.06261	0.259772	0.259772	1.94924	0.341532	0.341532
FBgn0039156	CG6178	_4	0.675256	0	0	1.21984	4.13157	1.21984	0.614964	0	0	0.438786	1.78904	0.438786
FBgn0039697	CG7834	_4	0.957493	1.61872	0.957493	2.13247	3.28693	2.13247	2.75683	2.37219	2.37219	0.339378	0.159713	0.159713
FBgn0050359	Mal-A5	_4	0	6.9186	0	1.26257	4.81466	1.26257	0	0	0	0	1.41978	0
FBgn0052473	CG32473	_4	0	0	0	4.79351	6.60583	4.79351	0.566843	0	0	0	3.00349	0
FBgn0053113	Rtnl1	_4	0.593322	2.13623	0.593322	2.71994	0	0	2.84836	1.98583	1.98583	0.370787	0.587526	0.370787
FBgn0063491	GstE9	_4	0	3.2779	0	1.08751	4.91926	1.08751	1.01085	4.60003	1.01085	0.0417397	1.5719	0.0417397
FBgn0063492	GstE8	_4	0	1.30284	0	0.505	3.59185	0.505	0.354386	2.49015	0.354386	0	1.37267	0
FBgn0063493	GstE7	_4	0	1.65803	0	0.524313	4.76606	0.524313	0.383635	3.46169	0.383635	0.0608825	1.40381	0.0608825
FBgn0063494	GstE6	_4	0.170351	1.3412	0.170351	2.21032	6.67171	2.21032	0.842449	2.55833	0.842449	0	1.37267	0
FBgn0063495	GstE5	_4	0	2.05932	0	0.513514	4.81894	0.513514	0.354386	2.49015	0.354386	0	1.37267	0
FBgn0063496	GstE4	_4	0	1.30284	0	0.505	3.55446	0.505	1.20325	3.09871	1.20325	0	1.37267	0
FBgn0063497	GstE3	_4	0	1.6567	0	1.42873	4.34077	1.42873	0.87523	2.84463	0.87523	0	1.96735	0
FBgn0063499	GstE10	_4	0.081495	1.32235	0.081495	1.2982	3.71443	1.2982	0.354386	2.49015	0.354386	0	1.37267	0
FBgn0086254	CG6084	_4	0.184116	0.0508184	0.0508184	1.2554	2.78395	1.2554	1.10788	1.06022	1.06022	0.471582	0.710307	0.471582
FBgn0086443	AsnRS	_4	0.643654	2.64812	0.643654	1.15522	2.26166	1.15522	1.00324	3.44763	1.00324	0.798093	2.91759	0.798093
FBgn0261243	Psa	_4	0	0	0	1.30402	2.58272	1.30402	1.06685	0.345862	0.345862	2.04938	0.897311	0.897311
FBgn0262716	Arp3	_4	1.24727	0.753512	0.753512	3.92991	0.347876	0.347876	2.42406	2.0293	2.0293	0.62923	1.48773	0.62923
FBgn0262782	Mdh1	_4	1.5053	2.45842	1.5053	3.50901	3.10579	3.10579	0.439341	3.30388	0.439341	0.553114	1.88427	0.553114
FBgn0263199	Galk	_4	0.545214	4.14719	0.545214	2.70894	2.54969	2.54969	0.250539	4.58811	0.250539	0	6.16407	0
FBgn0264294	Cyt-b5	_4	0.865367	0	0	2.95703	2.77904	2.77904	1.24926	0.670471	0.670471	0.681615	0.209535	0.209535
FBgn0000116	Argk	_8	0.616651	3.80153	0.616651	0.323198	2.28979	0.323198	1.28064	0.845263	0.845263	0.38294	1.69836	0.38294
FBgn0000261	Cat	_8	0.494845	2.6597	0.494845	0.430634	1.18219	0.430634	0.893878	2.68813	0.893878	0.557468	0	0
FBgn0000412	D1	_8	0	2.67521	0	0	0	0	1.98339	0.826704	0.826704	1.43852	0	0
FBgn0000473	Cyp6a2	_8	0.309666	5.15506	0.309666	4.3271	1.22817	1.22817	0	0	0	0	0	0
FBgn0000536	eas	_8	1.95202	2.78182	1.95202	1.34072	0.399827	0.399827	0.423266	0.12837	0.12837	0.858396	1.24327	0.858396
FBgn0000566	Eip55E	_8	1.90469	3.0179	1.90469	0.522058	0.77234	0.522058	1.93479	2.01381	1.93479	1.84405	3.32729	1.84405
FBgn0001104	Galphai	_8	0	1.96561	0	1.25248	0.209717	0.209717	1.38186	1.89371	1.38186	0	0	0
FBgn0001142	Gs1	_8	1.67155	3.95686	1.67155	0.327131	0	0	0.687977	1.83602	0.687977	0.039236	1.84903	0.039236
FBgn0001230	Hsp68	_8	0	2.19755	0	2.68466	0	0	0	2.53019	0	2.39556	0	0
FBgn0001248	Idh	_8	0.141395	4.28209	0.141395	2.0302	3.57614	2.0302	1.92156	0.524706	0.524706	0.310483	1.23364	0.310483
FBgn0001257	ImpL2	_8	0.0395958	3.63353	0.0395958	0.804308	0	0	0.725445	2.26009	0.725445	0	0.941558	0
FBgn0002284	Prosbeta6	_8	1.04545	1.52959	1.04545	1.7565	1.30151	1.30151	0.801053	0.716627	0.716627	1.5386	1.45924	1.45924
FBgn0002645	Map205	_8	0.0121203	2.28317	0.0121203	0.166268	0	0	1.57275	1.28766	1.28766	2.27125	0.0937304	0.0937304
FBgn0002736	mago	_8	0.407578	1.45733	0.407578	1.76835	0.567394	0.567394	1.73062	1.20896	1.20896	0.517567	0	0
FBgn0004872	piwi	_8	0	4.26048	0	0	0	0	0	0	0	0	0	0
FBgn0004901	Prat	_8	2.79663	1.42082	1.42082	1.39186	1.47743	1.39186	0.0372929	1.19424	0.0372929	1.22921	0.991097	0.991097
FBgn0005666	bt	_8	1.30017	2.60016	1.30017	0.924748	1.15285	0.924748	1.94872	0.0771981	0.0771981	0	2.98542	0
FBgn0005777	PpD3	_8	0	1.86703	0	0.970445	0.285114	0.285114	1.99234	1.43283	1.43283	1.23712	0.933793	0.933793
FBgn0008635	betaCOP	_8	1.13289	2.49584	1.13289	1.1576	1.8595	1.1576	0.998875	1.63962	0.998875	0.466195	0.670844	0.466195
FBgn0010039	GstD3	_8	0	2.54556	0	0.63751	0	0	0.0852338	3.24061	0.0852338	0.752335	1.01643	0.752335
FBgn0010348	Arf79F	_8	0.889894	1.85486	0.889894	0.789357	1.83293	0.789357	0.879639	2.75273	0.879639	0.0547219	0.340455	0.0547219
FBgn0010391	Gtp-bp	_8	1.66635	2.95766	1.66635	3.60687	1.44268	1.44268	0.187774	0.45233	0.187774	1.48914	0.636156	0.636156
FBgn0010412	RpS19a	_8	3.3638	2.49072	2.49072	2.25553	1.08449	1.08449	0.0448957	2.28407	0.0448957	1.74586	2.64303	1.74586
FBgn0010482	l(2)01289	_8	1.69558	1.57168	1.57168	1.93024	1.80292	1.80292	2.01903	0	0	0	2.81243	0
FBgn0010516	wal	_8	1.85359	2.12181	1.85359	1.32519	2.54822	1.32519	1.1739	2.82544	1.1739	0.718926	0.443449	0.443449
FBgn0010590	Prosbeta1	_8	2.25094	1.94729	1.94729	2.66252	1.21782	1.21782	0.250226	0.117858	0.117858	0.718952	1.33138	0.718952
FBgn0010638	Sec61beta	_8	3.33287	1.31517	1.31517	3.31398	1.48422	1.48422	0.541154	0	0	1.15298	0.395852	0.395852
FBgn0010747	Srp54k	_8	1.36454	2.20441	1.36454	3.27978	1.3752	1.3752	0.424804	0.106378	0.106378	1.35463	0.233588	0.233588
FBgn0010786	l(3)02640	_8	0	1.52136	0	1.91637	2.35685	1.91637	0.130542	1.15847	0.130542	0	0	0
FBgn0011336	Stt3B	_8	2.44564	1.29085	1.29085	3.19347	1.61352	1.61352	1.60583	0	0	1.12304	0.350258	0.350258
FBgn0011747	Ank	_8	0.553792	2.14156	0.553792	0	1.80431	0	2.48957	1.27354	1.27354	0.392707	0.239723	0.239723
FBgn0011824	CG4038	_8	2.14559	1.73264	1.73264	2.77229	1.83407	1.83407	1.08292	0.0562094	0.0562094	0.230938	0.431871	0.230938
FBgn0011828	Pxn	_8	0	2.315	0	0.586686	0	0	1.80204	3.71408	1.80204	3.05356	0	0
FBgn0012036	Aldh	_8	2.63075	2.88112	2.63075	0.70139	4.89671	0.70139	1.93306	1.98618	1.93306	0.852222	1.12733	0.852222
FBgn0013772	Cyp6a8	_8	0.120577	4.80192	0.120577	0.678227	2.68707	0.678227	0	0	0	0	0	0
FBgn0013954	FK506-bp2	_8	0	1.54944	0	2.85239	0.856852	0.856852	1.58432	2.58431	1.58432	2.1672	0.210004	0.210004
FBgn0014032	Sptr	_8	0.128939	1.92762	0.128939	0.0807809	1.47781	0.0807809	0	0.521711	0	2.95211	1.84449	1.84449
FBgn0014863	Mlp84B	_8	0	1.95853	0	0.117119	1.83131	0.117119	0	0.695308	0	2.80884	0	0
FBgn0014879	Set	_8	0.100813	1.84066	0.100813	1.1497	0.171325	0.171325	0.934244	0.823844	0.823844	1.55429	0.00532427	0.00532427
FBgn0015039	Cyp9b2	_8	1.01636	5.36558	1.01636	3.6104	0.647212	0.647212	0.0500269	0	0	0	0	0
FBgn0015393	hoip	_8	0.509966	0.70029	0.509966	3.11495	1.1491	1.1491	1.19827	1.4033	1.19827	3.36183	0.117336	0.117336
FBgn0015781	P5cr	_8	1.37073	3.16084	1.37073	1.24924	1.76752	1.24924	0	2.05887	0	2.81771	0.667609	0.667609
FBgn0015808	ScpX	_8	0.914354	2.84414	0.914354	0	0.58157	0	0.824331	0.357122	0.357122	2.32803	0.252044	0.252044
FBgn0015929	dpa	_8	0	4.64613	0	0	0	0	0	0	0	0	0	0
FBgn0016013	Faa	_8	0.287911	4.84662	0.287911	0.0982844	0	0	0	0.13445	0	0.388641	2.57818	0.388641
FBgn0016675	Lectin-galC1	_8	0	3.19658	0	1.05327	0	0	2.60663	4.95768	2.60663	4.07012	0	0
FBgn0016687	Nurf-38	_8	3.26888	1.81468	1.81468	2.1293	1.41241	1.41241	0.131766	1.66075	0.131766	0.947213	1.123	0.947213
FBgn0016691	ATPsynO	_8	4.31926	3.13646	3.13646	0.589111	0	0	0	0	0	0	2.63789	0
FBgn0017558	Pdk	_8	0.0372749	2.79683	0.0372749	0.705305	2.71573	0.705305	0.774204	2.35456	0.774204	1.03219	0.877061	0.877061
FBgn0017577	Mcm5	_8	0	3.72757	0	0	0	0	0	0	0	0	0	0
FBgn0020236	ATPCL	_8	0.275458	2.59811	0.275458	0.560989	0.888394	0.560989	1.38482	1.07456	1.07456	0.506312	0.480611	0.480611
FBgn0021795	Tapdelta	_8	2.1024	2.06906	2.06906	2.1007	1.59295	1.59295	0.681048	0	0	1.27582	0.350464	0.350464
FBgn0023175	Prosalpha7	_8	0.788406	2.46739	0.788406	1.40194	1.02955	1.02955	0	0.956337	0	1.30555	1.6906	1.30555
FBgn0024509	Sec13	_8	1.00518	2.76335	1.00518	0.430362	0.938556	0.430362	0.810045	2.48566	0.810045	0.224329	0.175294	0.175294
FBgn0025454	Cyp6g1	_8	1.90856	3.02898	1.90856	0.742734	0.379433	0.379433	0	0	0	0	1.9067	0
FBgn0025700	CG5885	_8	1.37424	1.40841	1.37424	2.69383	1.03699	1.03699	0.687635	0	0	2.59284	0.456892	0.456892
FBgn0025724	beta'COP	_8	1.14269	1.72195	1.14269	1.15338	2.17578	1.15338	1.01873	1.07251	1.01873	0.307437	0.92234	0.307437
FBgn0025814	Mgstl	_8	1.35301	3.25566	1.35301	3.9736	0.674969	0.674969	0.384481	1.78889	0.384481	3.71308	0	0
FBgn0025815	Mcm6	_8	0	3.36371	0	0	0	0	0	0	0	0	0	0
FBgn0026060	Mipp2	_8	2.16736	2.2053	2.16736	2.62796	0	0	0	0	0	1.41206	0	0
FBgn0026061	Mipp1	_8	1.81626	2.86138	1.81626	2.03658	0	0	0.338359	0	0	1.57765	0	0
FBgn0026250	eIF1A	_8	2.86273	2.10039	2.10039	1.54174	1.61322	1.54174	1.56765	2.30684	1.56765	2.03931	3.19816	2.03931
FBgn0026418	Hsc70Cb	_8	0.146989	1.85196	0.146989	1.69804	0.0113504	0.0113504	1.02017	0.990287	0.990287	2.50581	0.177336	0.177336
FBgn0027496	epsilonCOP	_8	2.00033	2.47017	2.00033	1.15232	2.22504	1.15232	0.800664	1.57489	0.800664	0.644017	0.238136	0.238136
FBgn0027582	CG6230	_8	2.39222	4.02945	2.39222	0.717297	1.17251	0.717297	0.154167	0	0	0	0	0
FBgn0027945	ppl	_8	1.13844	4.6313	1.13844	2.08121	1.25227	1.25227	0.0746448	1.78064	0.0746448	0.887582	0.353119	0.353119
FBgn0028543	NimB2	_8	0	2.85858	0	0	0	0	0	0	0	3.10757	0	0
FBgn0028737	eEF1beta	_8	1.56603	2.06132	1.56603	0.814107	2.80772	0.814107	0	1.81758	0	3.23373	1.07657	1.07657
FBgn0028968	gammaCOP	_8	0.714375	2.48849	0.714375	1.06965	3.2306	1.06965	0.712881	0.950111	0.712881	0.0666097	0.695814	0.0666097
FBgn0029134	Prosbeta5	_8	2.25937	0.988542	0.988542	1.64637	1.54956	1.54956	0.828453	1.0703	0.828453	1.65608	0.74847	0.74847
FBgn0029172	Fad2	_8	0	3.68718	0	0	0	0	0	0	0	0	0	0
FBgn0029969	CG10932	_8	0.786918	2.70821	0.786918	1.00456	2.06454	1.00456	0	1.08608	0	2.05101	1.60996	1.60996
FBgn0029990	CG2233	_8	4.60265	2.42712	2.42712	1.47157	0.550182	0.550182	0.561296	0.194411	0.194411	1.85643	0.480319	0.480319
FBgn0029994	Ldsdh1	_8	1.64376	3.79779	1.64376	0.416378	2.29431	0.416378	1.24107	2.0528	1.24107	0.778263	1.09733	0.778263
FBgn0030089	AP-1gamma	_8	1.13858	1.93936	1.13858	0.536727	0.411354	0.411354	2.69253	1.51402	1.51402	0.647502	0.0424294	0.0424294
FBgn0030136	RpS28b	_8	0	3.55193	0	0	2.84968	0	0.295076	0.307515	0.295076	0	0.49543	0
FBgn0030306	Spase25	_8	1.64159	1.24555	1.24555	3.29347	2.68369	2.68369	0.443385	0.47163	0.443385	1.27472	0.273615	0.273615
FBgn0030612	CG5599	_8	2.19974	3.58767	2.19974	0.269673	2.35811	0.269673	0.188855	0.618525	0.188855	1.7423	2.26619	1.7423
FBgn0030731	Mfe2	_8	0.331252	2.88574	0.331252	0.435714	3.01655	0.435714	0.090832	0	0	3.11207	0	0
FBgn0030776	CG4653	_8	0	2.95456	0	0	2.8595	0	0	0	0	0	0	0
FBgn0031049	Sec61gamma	_8	1.43879	3.19529	1.43879	2.13782	1.28781	1.28781	0.65807	0	0	1.08139	0.248093	0.248093
FBgn0031069	Pmp70	_8	0.622553	3.60761	0.622553	0.103812	0.265449	0.103812	0	0	0	0.0702184	0	0
FBgn0031099	CG17065	_8	0	2.17794	0	1.70034	2.60104	1.70034	0.58904	0.187912	0.187912	0	0.0919239	0
FBgn0031143	CG1532	_8	0	3.1787	0	1.394	0.407283	0.407283	0.991137	1.9963	0.991137	3.33831	0.127805	0.127805
FBgn0031148	Cbs	_8	3.95115	4.52893	3.95115	1.48243	1.30382	1.30382	0	1.10359	0	0.227901	0	0
FBgn0031184	CG14615	_8	1.92672	3.8584	1.92672	0	2.70049	0	0	0	0	0	0	0
FBgn0031263	Tspo	_8	4.01847	2.99256	2.99256	0.390754	1.04901	0.390754	2.57127	0.368647	0.368647	3.16066	2.25631	2.25631
FBgn0031417	CG3597	_8	1.85702	2.8714	1.85702	1.17222	0.40542	0.40542	0.479901	2.12045	0.479901	0.149916	2.76188	0.149916
FBgn0031418	CG3609	_8	1.4742	2.3255	1.4742	0.757461	0.52656	0.52656	0.500074	1.86592	0.500074	0.0114345	3.67022	0.0114345
FBgn0031689	Cyp28d1	_8	1.79445	4.8862	1.79445	4.44127	0.326781	0.326781	2.40357	0.229892	0.229892	0.399272	0	0
FBgn0031717	Oscillin	_8	0	2.46337	0	2.07856	2.70641	2.07856	1.09034	0.496801	0.496801	0	0.336255	0
FBgn0031813	CG9527	_8	0	4.61411	0	0	2.51519	0	0	0	0	0.538116	0	0
FBgn0031824	CG9547	_8	0	1.79127	0	1.45308	0	0	0.800289	1.38589	0.800289	0.471341	0.358954	0.358954
FBgn0031942	CG7203	_8	3.20856	2.2099	2.2099	0	0.300317	0	1.21572	3.03752	1.21572	0.865337	1.16978	0.865337
FBgn0032149	CG4036	_8	5.80674	2.18484	2.18484	0	3.54037	0	0	0	0	0	0	0
FBgn0032161	CG4594	_8	2.3812	2.64242	2.3812	0.305517	1.0534	0.305517	0	0.485165	0	0	0	0
FBgn0032453	CG6180	_8	0.36392	3.19581	0.36392	2.31562	2.62186	2.31562	2.21847	0.366358	0.366358	0.698222	0.88032	0.698222
FBgn0032614	CG13284	_8	0.625764	4.1153	0.625764	0.00771683	0.00197098	0.00197098	0.811832	0	0	0	0	0
FBgn0032715	CG17597	_8	1.15637	2.34448	1.15637	1.51344	1.84095	1.51344	0.104059	1.51232	0.104059	4.6022	0.0837061	0.0837061
FBgn0032775	CG17544	_8	0.732112	2.50405	0.732112	0.248334	2.43413	0.248334	0.376601	0	0	0.133891	0.0758771	0.0758771
FBgn0032897	CG9336	_8	0	2.38421	0	0	0.443204	0	1.01151	0	0	1.91257	0	0
FBgn0032923	CG9248	_8	3.39774	3.02979	3.02979	0.143836	0.941889	0.143836	0.0690663	0.28182	0.0690663	0	0.0946369	0
FBgn0033065	Cyp6w1	_8	0.13468	4.46427	0.13468	0.809869	0.441429	0.441429	0.675688	0.331771	0.331771	0	0	0
FBgn0033205	CG2064	_8	0.483593	2.535	0.483593	1.11767	2.51543	1.11767	1.48326	2.04975	1.48326	0	0	0
FBgn0033214	CG1941	_8	7.54272	3.03388	3.03388	0	4.72873	0	0	0	0	0	0	0
FBgn0033302	Cyp6a14	_8	0.0727528	2.54558	0.0727528	0.567081	1.86225	0.567081	0.363067	0	0	0	0	0
FBgn0033543	CG12338	_8	2.05858	4.62812	2.05858	0.949783	2.10901	0.949783	0	3.11411	0	0.647559	0.142424	0.142424
FBgn0033555	RpS15Ab	_8	2.95731	3.1348	2.95731	2.24181	1.04217	1.04217	0	1.68874	0	1.41922	1.70546	1.41922
FBgn0033698	CG8858	_8	3.27449	2.38302	2.38302	2.24218	1.00631	1.00631	0	0.535081	0	0.757555	0.571183	0.571183
FBgn0033774	CG12374	_8	0	4.01977	0	0.147118	0	0	0	0	0	0	0	0
FBgn0033879	CG6543	_8	0.964025	4.29177	0.964025	0.965925	2.25541	0.965925	0.042907	4.22225	0.042907	0.00894649	0.10528	0.00894649
FBgn0034133	knon	_8	3.22804	2.26691	2.26691	0.215372	0	0	0	0	0	0	1.93318	0
FBgn0034176	ste24a	_8	0.755328	3.26117	0.755328	0.544028	0.436863	0.436863	0	0	0	0	0	0
FBgn0034277	OstDelta	_8	1.63241	2.84335	1.63241	4.58285	1.2406	1.2406	1.32181	0.051972	0.051972	1.53864	0.618268	0.618268
FBgn0034390	CG15093	_8	2.10996	4.05317	2.10996	0	1.94389	0	2.46002	2.58626	2.46002	0.244634	1.00695	0.244634
FBgn0034432	CG7461	_8	2.41101	2.18764	2.18764	0.214964	0.823442	0.214964	0	2.36307	0	1.35841	1.95311	1.35841
FBgn0034629	Acox57D-d	_8	0.502635	3.12899	0.502635	2.12013	1.68138	1.68138	0.0771137	0	0	3.38779	0	0
FBgn0034756	Cyp6d2	_8	0.266951	4.76887	0.266951	0.75101	0.253783	0.253783	0	0	0	0	0	0
FBgn0034898	CG18128	_8	0.966317	2.05065	0.966317	0	0.857139	0	1.10842	1.21108	1.10842	0	0.392564	0
FBgn0034936	CG2970	_8	2.16034	2.30451	2.16034	0.589855	0.00805435	0.00805435	0.94335	0.177907	0.177907	0	0.876765	0
FBgn0035272	mRpL46	_8	0	3.80193	0	5.15788	0	0	0.887191	0	0	2.03552	0	0
FBgn0035298	SCOT	_8	2.96503	4.42988	2.96503	0.974675	2.44492	0.974675	0	0.914183	0	0.0235078	1.96523	0.0235078
FBgn0035476	CG12766	_8	0	3.08864	0	0	0.316536	0	0	0	0	0	0.387165	0
FBgn0035665	Jon65Aiii	_8	0	2.30529	0	0.296767	2.05153	0.296767	0	0	0	0	0	0
FBgn0035811	CG12262	_8	0.113151	3.70912	0.113151	0.74451	0.852683	0.74451	0.157401	1.45965	0.157401	0.325827	0.343689	0.325827
FBgn0035827	Srp9	_8	3.05292	1.35199	1.35199	2.10981	2.40549	2.10981	0.617466	0.313524	0.313524	0.999904	0.524191	0.524191
FBgn0035947	Srp68	_8	2.20432	2.39241	2.20432	2.36961	1.24616	1.24616	0.719205	1.03042	0.719205	1.26147	0.932029	0.932029
FBgn0036030	CG6767	_8	1.27757	3.25435	1.27757	0.459235	0.95897	0.459235	0.294503	2.71916	0.294503	3.81259	1.34222	1.34222
FBgn0036271	Pbgs	_8	0	2.19061	0	2.54131	2.54273	2.54131	0.517205	1.76308	0.517205	0	0	0
FBgn0036337	AdenoK	_8	2.00954	2.68523	2.00954	0.0433108	2.41509	0.0433108	2.22103	0	0	0.0482255	3.46882	0.0482255
FBgn0036359	CG14105	_8	1.84936	2.22302	1.84936	0	0	0	0	0	0	0	3.89637	0
FBgn0036824	CG3902	_8	1.77497	3.93113	1.77497	0.213487	3.63236	0.213487	0.803723	0.471783	0.471783	1.88791	0.652239	0.652239
FBgn0036975	CG5618	_8	2.13588	3.00405	2.13588	1.5957	0.73367	0.73367	0	0	0	3.18968	0	0
FBgn0036992	CG11796	_8	1.47251	5.57481	1.47251	0	0.229501	0	0	0.224518	0	0	2.25633	0
FBgn0037057	CG10512	_8	1.13439	3.47065	1.13439	0.475635	1.68891	0.475635	0	0	0	1.38887	0	0
FBgn0037149	CG14561	_8	1.31406	2.84444	1.31406	0	1.91782	0	0	0	0	0	0	0
FBgn0037354	CG12171	_8	0.221706	2.3724	0.221706	1.53984	3.12602	1.53984	0	1.14661	0	1.83262	1.76179	1.76179
FBgn0037433	CG17919	_8	0.476184	2.50295	0.476184	2.06389	3.16281	2.06389	0.854505	0.0582256	0.0582256	0.669203	2.25011	0.669203
FBgn0037652	CG11980	_8	0.601763	3.7397	0.601763	0.89795	0.443438	0.443438	0.0465818	2.9867	0.0465818	1.87551	1.65725	1.65725
FBgn0037686	RpL34b	_8	3.44777	2.19199	2.19199	1.22739	1.20901	1.20901	0	2.75699	0	1.41598	1.86412	1.41598
FBgn0037696	GstZ1	_8	0.190244	7.22817	0.190244	1.22211	1.17673	1.17673	0.0549498	2.07434	0.0549498	1.46664	1.87519	1.46664
FBgn0037697	GstZ2	_8	0	5.58409	0	0.112483	0.078732	0.078732	0.132039	0.61019	0.132039	0.47755	1.50855	0.47755
FBgn0037709	CG8199	_8	1.69439	3.08468	1.69439	1.19269	2.15291	1.19269	0.0900979	0.0576349	0.0576349	4.22604	0.711852	0.711852
FBgn0037762	eloF	_8	0	5.9286	0	0.103703	0	0	0	0	0	0	0	0
FBgn0037765	CG9458	_8	0	3.12372	0	0.323871	0.0693517	0.0693517	0	0	0	0	0	0
FBgn0037892	mRpL40	_8	0	4.84893	0	5.54108	0	0	1.46304	0	0	2.75885	0	0
FBgn0037936	CG6908	_8	0.49264	1.8132	0.49264	1.79209	1.05178	1.05178	0	0	0	3.54002	0	0
FBgn0038033	CG10097	_8	0.947883	6.39085	0.947883	1.5312	1.29772	1.29772	0	0	0	0	0	0
FBgn0038037	Cyp9f2	_8	0.407508	5.88335	0.407508	0.6147	0.242705	0.242705	2.48451	1.20939	1.20939	0	0	0
FBgn0038194	Cyp6d5	_8	0.117727	4.63549	0.117727	1.5378	0.628802	0.628802	0.235016	0	0	0	0.043749	0
FBgn0038277	RpS5b	_8	2.71101	2.86252	2.71101	1.26235	1.01753	1.01753	0	1.63783	0	1.4378	1.68086	1.4378
FBgn0038349	AOX3	_8	0	2.12941	0	0	2.63233	0	1.06253	0.497651	0.497651	1.43671	1.41268	1.41268
FBgn0038516	P5cr-2	_8	2.47197	3.94935	2.47197	0.503549	4.01718	0.503549	0.0374958	2.10276	0.0374958	4.23594	0.519846	0.519846
FBgn0038742	Arc42	_8	0.758603	2.22443	0.758603	0.683538	1.53303	0.683538	1.62449	1.15463	1.15463	0.626015	0.541678	0.541678
FBgn0038805	TFAM	_8	0	1.68182	0	0.0661552	0.863741	0.0661552	0.892076	1.87532	0.892076	3.11406	0	0
FBgn0038810	Srp72	_8	1.99324	2.03003	1.99324	2.62169	1.53865	1.53865	0.386515	0	0	1.32232	0.310127	0.310127
FBgn0038826	Syp	_8	0.618213	2.07428	0.618213	1.27197	0.638614	0.638614	1.90288	1.12634	1.12634	0	1.59465	0
FBgn0038922	Idh3b	_8	1.28509	2.38702	1.28509	0.476781	0.346937	0.346937	2.65409	0.77539	0.77539	0	0.31166	0
FBgn0038972	CG7054	_8	1.01357	3.17415	1.01357	2.36406	3.36986	2.36406	0.190058	0.453684	0.190058	0.425746	0.644293	0.425746
FBgn0038973	Pebp1	_8	0.738611	4.0728	0.738611	2.96065	2.90685	2.90685	0	0	0	0	0.4317	0
FBgn0039172	Spase22-23	_8	2.59249	1.88737	1.88737	4.39312	1.01722	1.01722	0.186157	0	0	1.65833	0.248165	0.248165
FBgn0039300	RpS27	_8	2.5619	2.44443	2.44443	1.40743	1.36571	1.36571	0	2.05474	0	1.55512	2.01253	1.55512
FBgn0039311	CG10513	_8	0	5.87124	0	0	0.778706	0	0	0	0	0	0	0
FBgn0039316	CG11893	_8	0.164804	3.17148	0.164804	1.1321	1.63531	1.1321	0	0	0	2.49437	0	0
FBgn0039326	CG10562	_8	2.23996	3.47849	2.23996	0	2.24436	0	0	0.187269	0	0	0	0
FBgn0039519	Cyp6a18	_8	0.0630246	2.54525	0.0630246	1.96831	2.38575	1.96831	0	0	0	0	0	0
FBgn0039726	eIF2Balpha	_8	1.63863	1.78773	1.63863	0.854056	0.703056	0.703056	0	2.56103	0	1.25461	1.10766	1.10766
FBgn0039739	RpS28a	_8	0	2.59927	0	0	2.03717	0	0	0	0	0	0.21926	0
FBgn0040064	yip2	_8	1.10965	4.24177	1.10965	0	1.65762	0	1.12725	1.83694	1.12725	2.3379	1.93117	1.93117
FBgn0040211	hgo	_8	0.0675025	6.20805	0.0675025	0.232964	0.228198	0.228198	0	0.577804	0	0.66022	1.54794	0.66022
FBgn0040340	TRAM	_8	2.18693	2.09758	2.09758	4.13872	1.09791	1.09791	0.341439	0.8266	0.341439	1.68142	1.81327	1.68142
FBgn0040349	CG3699	_8	0	2.70355	0	0.174971	2.3915	0.174971	0	1.13582	0	2.83228	2.1743	2.1743
FBgn0041194	Prat2	_8	2.74986	2.15553	2.15553	1.83391	0.644963	0.644963	0.507668	1.28343	0.507668	1.94218	1.7342	1.7342
FBgn0041629	Hexo2	_8	0.332838	3.71855	0.332838	0	1.86859	0	0	1.15578	0	1.68887	0	0
FBgn0041775	tral	_8	0.395979	3.17985	0.395979	0	0.308892	0	1.46084	1.08925	1.08925	0	1.72069	0
FBgn0042134	Capr	_8	0.10595	2.43775	0.10595	0	0	0	1.85848	2.36412	1.85848	0	1.29485	0
FBgn0045866	bai	_8	0.961662	5.36206	0.961662	0.536476	0.309277	0.309277	0.0178187	0	0	0	0	0
FBgn0050008	CG30008	_8	0	4.07989	0	0.0358021	0	0	0	0	0	0	0	0
FBgn0051075	CG31075	_8	5.58368	3.75419	3.75419	2.64727	3.49711	2.64727	0.00888087	1.67455	0.00888087	0.412455	0.120963	0.120963
FBgn0051546	CG31546	_8	0	2.10107	0	0.117598	1.67356	0.117598	0	1.0676	0	1.6976	1.74673	1.6976
FBgn0051548	CG31548	_8	0	2.77917	0	0.12364	2.98211	0.12364	0	1.44597	0	3.3799	2.21367	2.21367
FBgn0051549	CG31549	_8	0.492704	2.36155	0.492704	0.22811	1.74088	0.22811	0	1.15824	0	1.74803	1.7865	1.74803
FBgn0051674	CG31674	_8	1.8363	5.186	1.8363	3.15915	2.72274	2.72274	0	0.399088	0	0	0	0
FBgn0052495	Gss2	_8	0.93291	2.66992	0.93291	1.30956	2.52127	1.30956	1.19251	1.54187	1.19251	3.05156	0.213252	0.213252
FBgn0053056	CG33056	_8	2.14972	3.08949	2.14972	0	0	0	0	0	0	0	4.06275	0
FBgn0053177	CG33177	_8	0.428596	1.73899	0.428596	1.73649	0	0	0	0.553864	0	1.68376	0	0
FBgn0053178	CG33178	_8	0.5349	2.29467	0.5349	1.73649	0	0	0	0.553864	0	1.68376	0	0
FBgn0061356	CG18003	_8	2.23078	3.66833	2.23078	0.255532	1.98397	0.255532	1.03466	1.94337	1.03466	2.72004	0.167528	0.167528
FBgn0065109	ppk11	_8	0	3.08379	0	1.02638	2.05555	1.02638	0	0	0	1.48847	0	0
FBgn0086357	Sec61alpha	_8	3.41434	2.92059	2.92059	2.44345	1.18622	1.18622	0.129551	0	0	3.11911	0.192817	0.192817
FBgn0086450	su(r)	_8	0	2.57599	0	0.595834	2.66273	0.595834	0.528106	0.546152	0.528106	0	0.0253485	0
FBgn0086558	Ubi-p5E	_8	2.41022	3.49187	2.41022	2.85686	2.33494	2.33494	1.97427	2.98764	1.97427	2.3262	2.16404	2.16404
FBgn0086687	Desat1	_8	0.55181	3.62588	0.55181	1.56507	2.69463	1.56507	0	0	0	0	0	0
FBgn0087035	AGO2	_8	0.431915	2.15193	0.431915	2.03382	1.56761	1.56761	0.558831	0.942128	0.558831	1.9618	1.37323	1.37323
FBgn0250823	gish	_8	0.322652	1.83924	0.322652	0.23619	1.0559	0.23619	1.61949	1.08018	1.08018	0.477619	0.592784	0.477619
FBgn0260960	Baldspot	_8	0.385569	4.29166	0.385569	1.83508	0.605049	0.605049	0.00154825	0	0	0.803521	0	0
FBgn0261575	tobi	_8	0	2.24875	0	1.35103	1.94893	1.35103	0	0.994227	0	0	0.33817	0
FBgn0262801	twr	_8	1.43957	1.50484	1.43957	4.44578	2.15146	2.15146	0.144184	0	0	0.85769	0.12	0.12
FBgn0263852	Dad1	_8	2.28664	1.36526	1.36526	2.21948	1.49507	1.49507	0.181458	0	0	1.40873	0.227688	0.227688
FBgn0265048	cv-d	_8	1.27591	3.95612	1.27591	0	0	0	0.163243	0	0	0	0.664378	0
FBgn0265137	Spn42Da	_8	0.545601	3.70529	0.545601	0	0.923076	0	0.36543	0	0	1.03588	0.9811	0.9811
FBgn0266064	GlyS	_8	0.577001	3.66823	0.577001	1.41178	1.09827	1.09827	1.86762	0.801919	0.801919	0.0225032	2.29113	0.0225032
FBgn0266417	ringer	_8	0.921707	2.27009	0.921707	2.13275	0.347934	0.347934	1.7775	1.38917	1.38917	3.62172	0.245795	0.245795
FBgn0267376	SelR	_8	0.133912	2.48352	0.133912	0	0.460294	0	0	2.54514	0	1.53519	1.20774	1.20774
FBgn0000038	nAChRbeta1	_5	0.211666	0.0703597	0.0703597	0	0	0	2.54676	1.27874	1.27874	0	0	0
FBgn0000108	Appl	_5	0	0	0	0	0	0	1.31064	0.697227	0.697227	0.0184256	0	0
FBgn0000120	Arr1	_5	0	0	0	0	0	0	2.26778	2.50616	2.26778	0	0	0
FBgn0000121	Arr2	_5	0	0	0	0	0	0	1.8545	3.62367	1.8545	0	0	0
FBgn0000173	ben	_5	0	0	0	0	0.126556	0	1.95266	0.0339926	0.0339926	0.96494	0.673424	0.673424
FBgn0000212	brm	_5	1.73353	0.518713	0.518713	0.233944	0	0	0.812517	2.30028	0.812517	0.0772337	0	0
FBgn0000229	bsk	_5	0.00169238	0	0	0.140162	0.225063	0.140162	1.01696	1.64812	1.01696	0.0152415	0.0156609	0.0152415
FBgn0000239	bur	_5	0	0	0	0	0	0	2.18233	0	0	1.00227	0	0
FBgn0000244	by	_5	0.395401	0.176064	0.176064	0.299812	0.428146	0.299812	2.43407	0.0612228	0.0612228	1.13197	0.440927	0.440927
FBgn0000273	Pka-C1	_5	0.23127	0.549143	0.23127	0.469435	0.468209	0.468209	0.811629	2.63031	0.811629	2.05893	2.96428	2.05893
FBgn0000346	comt	_5	0	0	0	0.260275	0	0	0.816131	0.115947	0.115947	0.0554819	0.320348	0.0554819
FBgn0000414	Dab	_5	0	0	0	0	0	0	3.01917	1.17866	1.17866	0	0	0
FBgn0000416	Sap-r	_5	0.83885	0	0	0.28835	0.597317	0.28835	2.54657	0.855098	0.855098	0	0.833577	0
FBgn0000426	SmF	_5	0.305297	0.142557	0.142557	1.40788	1.56949	1.40788	1.59294	0.994754	0.994754	0	0	0
FBgn0000479	dnc	_5	0	0.10481	0	0	1.06821	0	1.34927	2.58879	1.34927	0	2.1028	0
FBgn0000535	eag	_5	0	0	0	0	0	0	1.32149	0	0	0	0	0
FBgn0000541	E(bx)	_5	0	0	0	0.250458	0	0	0.823599	1.86851	0.823599	0	0	0
FBgn0000565	Eip71CD	_5	0.431013	1.65926	0.431013	0.188803	0.346472	0.188803	1.39963	0.86122	0.86122	1.08744	0.295736	0.295736
FBgn0000662	fl(2)d	_5	0	0.213244	0	0	0	0	1.69667	0.544264	0.544264	0.144622	0	0
FBgn0000709	fliI	_5	0	0	0	0.391287	0	0	0.622325	0.835761	0.622325	0	0	0
FBgn0000711	flw	_5	0	0.25653	0	0.822717	1.1489	0.822717	2.29985	2.88337	2.29985	0.215843	1.5595	0.215843
FBgn0001105	Gbeta13F	_5	0.0852257	0	0	0.0443438	0	0	2.26141	2.75196	2.26141	0.276183	0	0
FBgn0001108	DCTN1-p150	_5	0.105873	0.134548	0.105873	0.780181	0.153483	0.153483	0	2.18002	0	0.134016	0	0
FBgn0001122	Galphao	_5	1.17639	0	0	0.182875	0	0	1.94149	1.56629	1.56629	0	0	0
FBgn0001123	Galphas	_5	0	0.389019	0	0	0	0	3.24468	0.706631	0.706631	0	0	0
FBgn0001134	Grd	_5	0	0	0	0	0	0	1.03815	0	0	0	0	0
FBgn0001139	gro	_5	0.145778	0	0	0	0	0	0.869568	0.0989646	0.0989646	0	0	0
FBgn0001186	Hex-A	_5	0	0	0	0.903181	1.42831	0.903181	2.74286	1.17379	1.17379	0.994482	0	0
FBgn0001197	His2Av	_5	0	0	0	0	0.420823	0	0.862012	1.00419	0.862012	0	0.547554	0
FBgn0001208	Hn	_5	0.533629	1.199	0.533629	0	0	0	0.977673	3.00514	0.977673	0.347981	1.59617	0.347981
FBgn0001226	Hsp27	_5	0	1.22042	0	0.255226	0	0	3.07802	1.79515	1.79515	2.4333	1.51472	1.51472
FBgn0001227	Hsp67Ba	_5	0	0	0	0	0	0	1.42626	2.07704	1.42626	0	0.646445	0
FBgn0001229	Hsp67Bc	_5	0	0.078486	0	0	0	0	2.05381	2.34161	2.05381	0.706094	0.195187	0.195187
FBgn0001263	inaD	_5	0	0	0	0	0	0	0.193421	2.73304	0.193421	0	0	0
FBgn0001624	dlg1	_5	0.138359	0.0439617	0.0439617	0	0	0	1.1544	2.42527	1.1544	0.00396078	0.916858	0.00396078
FBgn0001965	Sos	_5	0	0	0	0	0.0280798	0	1.70452	0.667028	0.667028	0	0	0
FBgn0001978	stc	_5	0.343484	0	0	0.54208	0.179705	0.179705	1.17156	0.819464	0.819464	0	0	0
FBgn0002044	swm	_5	0.262188	0	0	0.261034	0.481625	0.261034	1.32565	0.968945	0.968945	0	0	0
FBgn0002183	dre4	_5	0	0.324001	0	0.0493352	1.58211	0.0493352	2.32873	1.23713	1.23713	0	0	0
FBgn0002525	Lam	_5	0	0.431229	0	0.891396	2.31489	0.891396	3.08942	3.64846	3.08942	0.875955	1.43793	0.875955
FBgn0002526	LanA	_5	0	0	0	0	2.09194	0	1.64078	0.912025	0.912025	0.0106301	0.573164	0.0106301
FBgn0002567	Rab32	_5	0	0.114214	0	0	1.22475	0	0.429571	1.84395	0.429571	0	0	0
FBgn0002781	mod(mdg4)	_5	0.105078	0	0	0	0.122154	0	0.429125	0.0933989	0.0933989	0	0.83415	0
FBgn0002936	ninaA	_5	0	0	0	0	0	0	2.23146	1.57012	1.57012	0	0	0
FBgn0002938	ninaC	_5	0	0	0	0	0	0	1.73187	3.97106	1.73187	0	0	0
FBgn0003041	pbl	_5	0	0	0	0	0	0	1.23776	0.686888	0.686888	0	0	0
FBgn0003053	peb	_5	0.107365	0	0	1.15545	0.993641	0.993641	0.0507886	3.268	0.0507886	0.383615	0.480263	0.383615
FBgn0003071	Pfk	_5	0	0	0	0.19356	0	0	3.08117	2.36232	2.36232	0.990045	0.882336	0.882336
FBgn0003091	Pkc53E	_5	0	0	0	0	0.155059	0	1.6676	1.92434	1.6676	0	0.326389	0
FBgn0003134	Pp1alpha-96A	_5	0	0.234617	0	0	0.873943	0	3.475	1.22685	1.22685	0	0	0
FBgn0003175	px	_5	0	0	0	0	0	0	1.29584	0	0	0	0	0
FBgn0003210	rb	_5	0.246818	0.495597	0.246818	0.174454	0.26041	0.174454	0	5.28157	0	0	0	0
FBgn0003275	RpII18	_5	0.25707	0	0	0.405708	1.34168	0.405708	1.26308	0.784765	0.784765	0	0	0
FBgn0003301	rut	_5	0	0	0	0	0	0	1.10277	0.48093	0.48093	0	0	0
FBgn0003330	Sce	_5	0	0	0	0	0	0	0.998157	2.09401	0.998157	0	0	0
FBgn0003334	Scm	_5	0	0	0	0	0	0	1.16458	1.35819	1.16458	0	0	0
FBgn0003346	RanGAP	_5	0.0960005	0.471079	0.0960005	0.0918111	0.715058	0.0918111	1.41473	0.356714	0.356714	0.382824	0.801895	0.382824
FBgn0003360	sesB	_5	1.89533	0.778396	0.778396	0.0819641	1.20536	0.0819641	3.00793	2.3948	2.3948	0.346739	1.05778	0.346739
FBgn0003380	Sh	_5	0	0	0	0	0	0	1.73315	2.26299	1.73315	0	0.170995	0
FBgn0003449	snf	_5	0.52583	0.0166829	0.0166829	0.545545	0.460323	0.460323	3.00374	1.02424	1.02424	0	0	0
FBgn0003475	spir	_5	0	0	0	0	0	0	0.802326	0.214634	0.214634	0	0	0
FBgn0003502	Btk29A	_5	0	0	0	0	0	0	0.738943	0.312402	0.312402	0	0	0
FBgn0003557	Su(dx)	_5	0	1.24796	0	0.0547003	0	0	0.11342	1.39906	0.11342	0.27806	0.177349	0.177349
FBgn0003607	Su(var)205	_5	0.0532272	0.0601999	0.0532272	0	0.262863	0	3.19095	1.74941	1.74941	0.97823	0.242532	0.242532
FBgn0003660	Syb	_5	0.362082	0.628262	0.362082	1.1286	0.695197	0.695197	1.33386	0.80116	0.80116	0.152051	0.400742	0.152051
FBgn0003742	tra2	_5	0.0835952	0	0	0	0	0	0.782312	0	0	0.171067	0	0
FBgn0003748	Treh	_5	0	2.25511	0	0.94139	0	0	2.06741	3.17451	2.06741	1.88866	2.01471	1.88866
FBgn0003862	trx	_5	0	0	0	0	0	0	1.11199	0.0990913	0.0990913	0	0	0
FBgn0003969	vap	_5	0	0	0	0	0	0	1.3613	0	0	0	0	0
FBgn0004103	Pp1-87B	_5	0.895915	0.129573	0.129573	0.0301293	0.0451224	0.0301293	1.17467	0.771489	0.771489	0	0.48445	0
FBgn0004108	Nrt	_5	0	0	0	0	0	0	1.10558	1.99941	1.10558	0	0.329506	0
FBgn0004177	mts	_5	0.306398	0.265554	0.265554	1.05272	1.06965	1.05272	2.05481	1.14628	1.14628	1.34673	0	0
FBgn0004179	Csp	_5	0	0	0	0	0	0	4.03356	4.11824	4.03356	1.74286	0.952633	0.952633
FBgn0004227	nonA	_5	0.630051	0.0111	0.0111	0.135156	0.372628	0.135156	2.75355	2.35081	2.35081	0.601017	0.318803	0.318803
FBgn0004237	Hrb87F	_5	1.03075	0.734535	0.734535	0.97719	0.494994	0.494994	2.74205	1.50935	1.50935	0.231737	0	0
FBgn0004242	Syt1	_5	0	0.00286119	0	0	0	0	1.7754	0.649925	0.649925	0.310101	0.594125	0.310101
FBgn0004401	Pep	_5	0.854005	0	0	0	0	0	2.35212	2.19238	2.19238	0.41454	0	0
FBgn0004432	Cyp1	_5	0	0	0	0.485446	2.09781	0.485446	0.782513	0.831962	0.782513	0	0.740452	0
FBgn0004435	Galphaq	_5	0.438835	0	0	0.350318	0	0	0.778003	0.888542	0.778003	0	0	0
FBgn0004516	Gad1	_5	0	0	0	0	0	0	0.88741	0	0	0.2521	0	0
FBgn0004574	Rop	_5	0	0.0895375	0	0.939087	1.10141	0.939087	2.63319	1.89101	1.89101	0.39377	1.16148	0.39377
FBgn0004575	Syn	_5	0	0	0	0.127865	0	0	3.65847	1.57528	1.57528	0.0676123	0.79854	0.0676123
FBgn0004587	B52	_5	0.416215	0.551923	0.416215	0.955876	0.209342	0.209342	3.05512	1.57041	1.57041	0.449094	0.0754333	0.0754333
FBgn0004619	GluRIA	_5	0	0	0	0	0	0	0.722917	0.337872	0.337872	0	0	0
FBgn0004623	Gbeta76C	_5	0	0	0	0	0	0	3.21596	3.22557	3.21596	0	0	0
FBgn0004638	drk	_5	0	0	0	0	0.891292	0	1.03206	1.20203	1.03206	0	0.544122	0
FBgn0004646	ogre	_5	0	0.288295	0	0	0.446183	0	1.50326	1.93439	1.50326	0.738617	0	0
FBgn0004648	svr	_5	0	0.250633	0	1.80114	0.229571	0.229571	0.924025	1.16478	0.924025	0.122024	0.0892352	0.0892352
FBgn0004656	fs(1)h	_5	0	0.830964	0	0	0.713445	0	1.39183	0.175194	0.175194	0	0	0
FBgn0004657	mys	_5	0	0.101104	0	0	2.00907	0	1.03425	0.105469	0.105469	0.0273479	1.31851	0.0273479
FBgn0004784	inaC	_5	0	0	0	0	0	0	0.396726	2.7244	0.396726	0	0	0
FBgn0004852	Ac76E	_5	0	0	0	0	0	0	1.26808	0.301656	0.301656	0	0	0
FBgn0004855	RpII15	_5	0.26266	0.811815	0.26266	0.681003	0.369154	0.369154	1.13383	1.45759	1.13383	1.03691	0.0320261	0.0320261
FBgn0004868	Gdi	_5	0.209051	0	0	0.488341	1.10314	0.488341	4.18147	0.834268	0.834268	1.07444	0.416753	0.416753
FBgn0005586	Rab3	_5	0.00369779	0	0	0	0	0	1.54725	1.27827	1.27827	0.33357	0	0
FBgn0005626	ple	_5	0	0	0	0	0	0	1.29275	0.968634	0.968634	0.0919975	0	0
FBgn0005648	Pabp2	_5	0.438031	0.134645	0.134645	1.48805	0.352117	0.352117	1.93524	1.2573	1.2573	0	0	0
FBgn0010014	CanB	_5	0	0	0	0	0.0803292	0	1.64149	0	0	0	0	0
FBgn0010114	hig	_5	0	0	0	0	0	0	1.21016	0.830033	0.830033	0	0	0
FBgn0010215	alpha-Cat	_5	1.14269	0.162725	0.162725	0	0.718241	0	1.75775	1.99652	1.75775	0.13448	0	0
FBgn0010240	Lcch3	_5	0	0	0	0	0	0	1.65174	0	0	0	0	0
FBgn0010280	Taf4	_5	0	0	0	0	0.262765	0	2.15884	0.169449	0.169449	0	0	0
FBgn0010282	TfIIFalpha	_5	0.24345	0	0	0.457802	0.156851	0.156851	3.05361	1.04435	1.04435	0	0	0
FBgn0010303	hep	_5	0	0	0	0	0	0	1.12986	0.287173	0.287173	0	0	0
FBgn0010328	woc	_5	0.0855488	0	0	0.533313	0.120442	0.120442	2.7039	0	0	0.047933	0	0
FBgn0010329	Tbh	_5	0	0	0	0	0	0	2.19253	0.686107	0.686107	0.0330247	0	0
FBgn0010333	Rac1	_5	0	0	0	0	0.467218	0	4.60627	2.67777	2.67777	0	0.233075	0
FBgn0010341	Cdc42	_5	0.099339	0	0	0.515369	0.144067	0.144067	2.55347	1.23893	1.23893	0.560609	0	0
FBgn0010342	Map60	_5	0	0	0	0.373621	0	0	2.22684	1.12774	1.12774	0	0.0337117	0
FBgn0010355	Taf1	_5	0	0	0	0.741779	0	0	1.04547	0	0	0	0	0
FBgn0010380	AP-1-2beta	_5	0.714662	1.07146	0.714662	0.298509	0.646788	0.298509	1.96143	0.840928	0.840928	0.566059	1.12518	0.566059
FBgn0010397	LamC	_5	0	0	0	0	1.06082	0	2.78091	0.714595	0.714595	0	1.81806	0
FBgn0010399	Nmdar1	_5	0	0	0	0	0	0	1.01028	0.148756	0.148756	0	0	0
FBgn0010407	Ror	_5	0	0	0	0	0	0	0	3.62631	0	0	0	0
FBgn0010416	TH1	_5	0	0	0	0	0	0	0.694958	0.281351	0.281351	0	0	0
FBgn0010421	TfIIFbeta	_5	1.04759	0	0	0.492171	0.240714	0.240714	1.77409	0.74623	0.74623	0.105104	0	0
FBgn0010434	cora	_5	0.300843	0	0	0	1.25419	0	1.90261	0.753302	0.753302	0	1.09637	0
FBgn0010438	mtSSB	_5	0.236554	0.655481	0.236554	0.187059	1.55077	0.187059	2.34272	2.74696	2.34272	1.292	0.576816	0.576816
FBgn0010488	NAT1	_5	0.88397	0.28242	0.28242	1.4159	0	0	1.71784	0	0	0.585499	0	0
FBgn0010548	Aldh-III	_5	0.983312	1.41206	0.983312	0.711096	0	0	1.45671	0.496451	0.496451	0	0.0721767	0
FBgn0010583	dock	_5	0	0	0	0.0140765	1.6694	0.0140765	1.17168	0.941821	0.941821	0	0	0
FBgn0010660	Nup214	_5	0.454624	0.596134	0.454624	0.09664	1.08912	0.09664	0.959756	1.4059	0.959756	1.03744	0.552226	0.552226
FBgn0010750	atms	_5	0	0	0	1.12608	1.51325	1.12608	1.66511	0.978015	0.978015	0	0	0
FBgn0010762	simj	_5	0	0	0	0	0	0	1.01319	0.308189	0.308189	0	0	0
FBgn0010774	Ref1	_5	0.347312	0.427868	0.347312	0.813069	0.98495	0.813069	3.77452	1.93032	1.93032	0.121574	0	0
FBgn0010905	Spn	_5	0	0	0	0	0.982053	0	2.42697	0.3559	0.3559	0	0	0
FBgn0011224	heph	_5	0.338837	0	0	2.71304	0.172928	0.172928	1.89145	2.12632	1.89145	0	0	0
FBgn0011225	jar	_5	0.157399	0.200485	0.157399	0	2.667	0	1.5488	0.139315	0.139315	0.0307081	0	0
FBgn0011270	Pglym87	_5	0.583575	0.00362582	0.00362582	0	0.169896	0	0.764023	1.23919	0.764023	0.695015	0.915164	0.695015
FBgn0011280	Obp19d	_5	0	0	0	0	0	0	0	2.39296	0	0	0	0
FBgn0011288	Snap25	_5	0	0	0	0	0	0	2.20893	0.592275	0.592275	0.824651	0.06522	0.06522
FBgn0011573	Cdc37	_5	0.00272487	1.24936	0.00272487	0.838615	0	0	0	2.1014	0	0.357043	0.905692	0.357043
FBgn0011742	Arp2	_5	1.01738	0.414319	0.414319	1.71054	0.305683	0.305683	1.49703	1.43439	1.43439	0.141203	0.442224	0.141203
FBgn0011745	Arp1	_5	0	0	0	0	0	0	1.294	0.13422	0.13422	0	0	0
FBgn0011763	Dp	_5	0	0	0	0	0	0	1.69076	0	0	0	0	0
FBgn0011769	Fdx1	_5	0	0.406104	0	0.135453	0.745513	0.135453	1.57282	1.00572	1.00572	0.174653	0.332936	0.174653
FBgn0011771	Hem	_5	0.97813	0.444115	0.444115	0.678037	0.473521	0.473521	4.02247	0.9413	0.9413	0	0	0
FBgn0011826	Pp2B-14D	_5	0.868244	0.545078	0.545078	0.430564	0.556807	0.430564	1.65461	1.05272	1.05272	0.457717	0.316276	0.316276
FBgn0012051	CalpA	_5	0.374082	0.559342	0.374082	0.62989	1.03933	0.62989	1.42736	0.734952	0.734952	0.49862	0.94103	0.49862
FBgn0013334	Sap47	_5	0.811628	0	0	0.466265	0.263099	0.263099	0.531843	3.16368	0.531843	2.14054	1.50759	1.50759
FBgn0013342	nSyb	_5	0.0799979	0.0621387	0.0621387	0.160126	0.215547	0.160126	2.39286	1.00528	1.00528	0.707231	1.45405	0.707231
FBgn0013343	Syx1A	_5	1.12971	0	0	0.53107	1.18849	0.53107	1.02296	1.91676	1.02296	0.617731	0.235719	0.235719
FBgn0013348	TpnC41C	_5	0.00909765	0	0	0	0	0	1.85342	2.55047	1.85342	0	2.33557	0
FBgn0013467	igl	_5	0	0	0	0	0	0	1.63838	2.0942	1.63838	0.00981898	0.444034	0.00981898
FBgn0013576	mtd	_5	0.0883683	0	0	0	1.38674	0	2.34953	1.6115	1.6115	0.261883	1.3105	0.261883
FBgn0013675	mt:CoII	_5	1.19767	0	0	1.25614	1.0535	1.0535	1.92805	1.96322	1.92805	0.783096	1.84816	0.783096
FBgn0013750	Arf51F	_5	1.6534	0.144697	0.144697	0	0	0	0.394302	2.53736	0.394302	0.580991	0.383282	0.383282
FBgn0013759	CASK	_5	0	0	0	0	0	0	3.57807	2.73164	2.73164	0.0455869	0	0
FBgn0013973	Gycbeta100B	_5	0	0.107037	0	0	0	0	1.99536	0.696859	0.696859	0	0	0
FBgn0014011	Rac2	_5	0	0	0	0.449576	0.671034	0.449576	2.62747	2.77747	2.62747	2.57758	0	0
FBgn0014028	SdhB	_5	0.69172	0.730683	0.69172	0.961897	1.23366	0.961897	2.42443	1.55227	1.55227	1.19853	1.85455	1.19853
FBgn0014189	Hel25E	_5	0	1.15619	0	0.601099	0.369301	0.369301	1.26826	0.388916	0.388916	0.0608423	1.04569	0.0608423
FBgn0014366	noi	_5	1.35186	0	0	0.782343	1.01725	0.782343	1.22825	0.978798	0.978798	0	0	0
FBgn0014869	Pglym78	_5	0.989994	0.497629	0.497629	0	0.370428	0	1.5788	3.07253	1.5788	1.41809	2.78494	1.41809
FBgn0014870	Psi	_5	0	0	0	0	0	0	1.26908	0.936403	0.936403	0.461792	0.0297702	0.0297702
FBgn0015221	Fer2LCH	_5	0	0	0	0	0.0570816	0	0.929345	2.62302	0.929345	0.767204	1.76321	0.767204
FBgn0015245	Hsp60A	_5	0	1.38193	0	0	1.57372	0	2.49353	2.10042	2.10042	0.658549	1.28799	0.658549
FBgn0015299	Ssb-c31a	_5	0.266042	0.136453	0.136453	0.16428	0.796248	0.16428	0.647387	1.90059	0.647387	0.348019	0.320364	0.320364
FBgn0015371	chn	_5	0	0	0	0	0	0	1.47574	0.903362	0.903362	0	0	0
FBgn0015513	mbc	_5	0	0.349511	0	1.05918	0.293979	0.293979	3.17489	1.0619	1.0619	0	0	0
FBgn0015575	alpha-Est7	_5	0.744632	0	0	0.858498	0.233778	0.233778	1.36006	0.886987	0.886987	0	0	0
FBgn0015614	CanB2	_5	0.0532511	0.837593	0.0532511	0	0.288444	0	1.47277	0.774697	0.774697	0.0958075	0	0
FBgn0015776	nrv1	_5	0.0818045	2.33268	0.0818045	0	0.853058	0	2.81767	0.828764	0.828764	1.15992	0.467689	0.467689
FBgn0015778	rin	_5	0.283425	0.183148	0.183148	1.08918	0.971281	0.971281	2.6569	2.03994	2.03994	0	0	0
FBgn0015789	Rab10	_5	0.631917	0.320528	0.320528	0.745569	0.361227	0.361227	1.29665	0	0	0.220247	0.129745	0.129745
FBgn0015799	Rbf	_5	0.0988913	0	0	0	0	0	0.955391	0	0	0	0	0
FBgn0015803	RtGEF	_5	0	0	0	0	0.201202	0	2.17528	0.692769	0.692769	0	0	0
FBgn0015818	Spx	_5	0.344806	0	0	0.545545	0.181096	0.181096	1.18786	0.842802	0.842802	0	0	0
FBgn0015949	hrg	_5	0.300632	0	0	0.727179	0.211928	0.211928	1.18626	0.817173	0.817173	0	0	0
FBgn0016126	CaMKI	_5	0.526354	0.453568	0.453568	0.11541	0.28432	0.11541	1.74681	2.28998	1.74681	0.0366835	0.682835	0.0366835
FBgn0016650	Lgr1	_5	0	0	0	0	0	0	0.814162	0.151055	0.151055	0	0	0
FBgn0016693	Past1	_5	0.144885	0.396599	0.144885	0.0877096	1.07177	0.0877096	2.93604	1.40236	1.40236	0.363372	0.339679	0.339679
FBgn0016975	stnB	_5	0	0	0	0	0	0	3.56576	4.02484	3.56576	1.51859	1.46569	1.46569
FBgn0016976	stnA	_5	0	0	0	0	0	0	4.79699	5.16774	4.79699	1.47202	1.35853	1.35853
FBgn0016977	spen	_5	0.182241	0	0	0.374898	0	0	0.749589	0	0	0	0	0
FBgn0016978	snRNP-U1-70K	_5	0.471884	0.381188	0.381188	0.815414	0.389356	0.389356	2.44918	2.8982	2.44918	0.150631	0	0
FBgn0017457	U2af38	_5	0.782886	0.0759302	0.0759302	2.22419	0.203522	0.203522	1.22665	1.06499	1.06499	0.642355	0	0
FBgn0017572	Mo25	_5	0.166113	0.684381	0.166113	1.28344	0	0	1.55086	0.686418	0.686418	0.198073	0.270194	0.198073
FBgn0017578	Max	_5	0	0.0803405	0	0	0	0	1.08459	0	0	0	0	0
FBgn0019637	Atu	_5	0	0	0	0.00123891	2.29417	0.00123891	0.882403	0.290509	0.290509	0	0	0
FBgn0020261	pcm	_5	0.859759	0.511847	0.511847	0	0	0	0.943597	0	0	0	0	0
FBgn0020299	stumps	_5	0	0	0	0	0	0	1.60153	0	0	0	0	0
FBgn0020306	dom	_5	0	0	0	0.145917	0	0	1.006	0.292751	0.292751	0.328012	0.0758347	0.0758347
FBgn0020371	Tim17b2	_5	0.802742	0.41004	0.41004	0	0.294832	0	0.682479	0.360802	0.360802	0.437188	0.289193	0.289193
FBgn0020510	Abi	_5	0.290385	0	0	0.558322	0.436448	0.436448	2.04743	0.618625	0.618625	0	0	0
FBgn0020618	Rack1	_5	0.254983	0	0	0.0316051	1.86394	0.0316051	1.40021	0.283473	0.283473	0.323352	0.247789	0.247789
FBgn0020622	Pi3K21B	_5	0	0	0	0.10062	0	0	1.18829	0.482017	0.482017	0	0	0
FBgn0020653	Trxr-1	_5	0.990936	0	0	1.78093	0	0	3.39654	3.02281	3.02281	0	2.73755	0
FBgn0021760	chb	_5	0	0.349949	0	0	0.298556	0	1.89311	0.438334	0.438334	0	0	0
FBgn0021800	Reph	_5	0	0	0	0	0	0	3.61827	0	0	0	0	0
FBgn0021847	l(2)k14710	_5	0	0.412117	0	0.396142	0	0	2.19361	1.05811	1.05811	0.434921	0	0
FBgn0022344	CG10340	_5	0.59033	0.634754	0.59033	0	1.34976	0	2.00149	0	0	0	0	0
FBgn0022710	Ac13E	_5	0	0	0	0	0	0	1.33975	0	0	0	0	0
FBgn0022942	Cbp80	_5	1.08922	0.178466	0.178466	0.596052	0.527016	0.527016	1.20566	0.925041	0.925041	0	0	0
FBgn0022943	Cbp20	_5	0.610137	0.351462	0.351462	1.30182	0.654481	0.654481	1.51579	0.981426	0.981426	0	0	0
FBgn0022960	vimar	_5	0	0.288926	0	0	0.0349886	0	1.74892	0.617137	0.617137	0	0.0369441	0
FBgn0022984	qkr58E-3	_5	0	0	0	0	0.21774	0	1.13587	1.22631	1.13587	0	0.0534074	0
FBgn0022986	qkr58E-1	_5	0.454449	0.0156118	0.0156118	0	0	0	2.7286	0.501068	0.501068	0.824414	0.247523	0.247523
FBgn0022987	qkr54B	_5	0.0208192	0	0	0	0	0	2.23373	0.658462	0.658462	0	0	0
FBgn0023081	gek	_5	0	0	0	0	0	0	1.87075	0.206091	0.206091	0	0	0
FBgn0023167	SmD3	_5	0.820648	0.000745939	0.000745939	0.846364	1.14542	0.846364	1.43264	1.85543	1.43264	0.884478	0	0
FBgn0023169	AMPKalpha	_5	0.891518	0.377457	0.377457	0.580973	0.450212	0.450212	0.657835	0.137912	0.137912	0.0268083	0.285998	0.0268083
FBgn0023172	RhoGEF2	_5	0	0	0	0	0	0	1.23776	0.789492	0.789492	0	0	0
FBgn0023178	Pdf	_5	0	0	0	0	0	0	0.865515	2.89818	0.865515	0	0	0
FBgn0023212	EloB	_5	0.558097	0.0745049	0.0745049	0	0.064279	0	2.79112	2.24104	2.24104	0.095609	0	0
FBgn0023388	Dap160	_5	0	0	0	0.0350907	2.53411	0.0350907	2.16807	1.82857	1.82857	0.256742	0.288522	0.256742
FBgn0023458	Rbcn-3A	_5	0.68933	0	0	0.80507	0.167537	0.167537	1.55493	1.33408	1.33408	0.867255	0.283662	0.283662
FBgn0023508	Ocrl	_5	0	0	0	0.109781	0.0833927	0.0833927	1.18197	0.597749	0.597749	0	0	0
FBgn0023509	mip130	_5	0.313586	0	0	0	1.32157	0	1.26743	0	0	0	0	0
FBgn0023531	CG32809	_5	0	0	0	0	0	0	1.86217	1.5041	1.5041	0	0	0
FBgn0024150	Ac78C	_5	0	0	0	0	0	0	1.78469	0.0222999	0.0222999	0	0	0
FBgn0024182	waw	_5	0.951898	0	0	0	0	0	0	1.85303	0	0	0	0
FBgn0024183	vig	_5	0.423176	0.216043	0.216043	0	0	0	1.338	0.0945676	0.0945676	0.387388	0.279809	0.279809
FBgn0024189	sns	_5	0	0	0	0	0	0	1.73373	0	0	0	0	0
FBgn0024273	WASp	_5	0	0	0	0.197889	0.0629928	0.0629928	2.4577	2.25041	2.25041	0	0	0
FBgn0024277	trio	_5	0	0	0	0	0.110646	0	2.46373	0.990588	0.990588	0	0	0
FBgn0024285	Srp54	_5	0.461947	0	0	0.885041	0.349168	0.349168	1.67153	1.26161	1.26161	0	0	0
FBgn0024542	Neos	_5	0	0	0	0	0	0	1.2414	0.279595	0.279595	0	0	0
FBgn0024698	Cpsf160	_5	0.300032	0	0	0.520203	0.14149	0.14149	1.18648	0.814147	0.814147	0	0	0
FBgn0024806	DIP2	_5	0	0	0	0	0	0	0.946994	0.36805	0.36805	0	0	0
FBgn0024814	Clc	_5	0.61535	0.498662	0.498662	0.514015	1.06476	0.514015	4.00476	1.08291	1.08291	0.445223	0.448021	0.445223
FBgn0024833	AP-1mu	_5	0.239428	0.821849	0.239428	0.9885	1.18879	0.9885	1.35546	0.793908	0.793908	0.294403	0.269672	0.269672
FBgn0024985	CG11448	_5	1.02089	0.287314	0.287314	0.914607	0	0	1.38112	0.0334951	0.0334951	0.616701	0	0
FBgn0025373	Fpps	_5	0	0.346768	0	0.315545	0	0	1.19611	2.8429	1.19611	0	0	0
FBgn0025381	rush	_5	0	0.278562	0	0.692707	0.195929	0.195929	0.621372	0	0	0.113017	0	0
FBgn0025463	Bap60	_5	0.166869	0.0970923	0.0970923	0	0	0	3.34612	0.697936	0.697936	0	0	0
FBgn0025571	SF1	_5	0.138156	0	0	0.491017	0.36354	0.36354	0.779449	1.31204	0.779449	0	0.0121361	0
FBgn0025574	Pli	_5	0	0	0	0	0	0	2.01441	0.468628	0.468628	0	0	0
FBgn0025628	CG4199	_5	0	0.641199	0	0.0319783	0.267314	0.0319783	0.971871	0.369165	0.369165	0.206872	0	0
FBgn0025641	DAAM	_5	0.00364635	0	0	0	0.185723	0	0.787874	0.105746	0.105746	0	0	0
FBgn0025777	homer	_5	0	0.290766	0	0.44544	0.0662236	0.0662236	0.803548	1.18655	0.803548	0	0	0
FBgn0026056	Rlip	_5	0	0	0	0	0	0	1.11152	0.634079	0.634079	0.101628	0	0
FBgn0026149	BCL7-like	_5	0	0	0	0.656608	0	0	0.671976	0	0	0.0466652	0	0
FBgn0026370	SRPK	_5	0.665582	0.249576	0.249576	0.719184	0.366281	0.366281	0.898651	0	0	0	0	0
FBgn0026373	RpII33	_5	1.04685	0.0200977	0.0200977	1.09699	1.0529	1.0529	1.34289	0.797184	0.797184	1.12717	0	0
FBgn0026375	RhoGAPp190	_5	0	0	0	0.0513875	0.442156	0.0513875	2.3026	1.33342	1.33342	0.399239	0	0
FBgn0026379	Pten	_5	0.256441	0	0	0	0	0	1.23314	0.0969337	0.0969337	0	0	0
FBgn0026439	Eaat1	_5	0.365945	0	0	0	0.0297966	0	1.75033	0.683609	0.683609	0	0.186229	0
FBgn0026533	Dek	_5	0	0	0	0	0	0	1.52864	1.4424	1.4424	0.990117	1.02976	0.990117
FBgn0026562	SPARC	_5	0	0	0	0	0.180187	0	0.642132	0.0253916	0.0253916	0	0	0
FBgn0026566	CG1307	_5	0	0.268492	0	0.27473	1.74642	0.27473	0.291834	0.147757	0.147757	0.985959	0	0
FBgn0026713	l(1)G0007	_5	0.344806	0	0	0.545545	0.181096	0.181096	1.18786	0.842802	0.842802	0	0	0
FBgn0027066	Eb1	_5	0.134214	0.618281	0.134214	0.337638	1.23788	0.337638	2.1341	0	0	0.338754	0	0
FBgn0027085	LeuRS-m	_5	0	0	0	0	0.216598	0	1.81432	0	0	0	0	0
FBgn0027108	Inx2	_5	1.21741	0.98966	0.98966	0.215536	0	0	2.14152	2.23972	2.14152	0	1.75366	0
FBgn0027280	l(1)G0193	_5	1.83479	0.188103	0.188103	0.112507	0	0	1.3273	1.7521	1.3273	0	1.27565	0
FBgn0027338	Kap-alpha3	_5	0.542295	0.93539	0.542295	1.26326	0.277926	0.277926	1.2486	2.78912	1.2486	0.021791	0.791491	0.021791
FBgn0027339	jim	_5	0	0	0	0.204264	0	0	0.992584	0	0	0	0	0
FBgn0027497	Madm	_5	0	0	0	0	0.653754	0	1.61174	0.0673472	0.0673472	0.597348	0.0253365	0.0253365
FBgn0027553	NELF-B	_5	0	0	0	0	0	0	0.715324	0.269137	0.269137	0	0	0
FBgn0027558	Pgant3	_5	0.472511	0	0	0	0	0	1.07568	0.401039	0.401039	0	0	0
FBgn0027575	GABA-B-R2	_5	0	0	0	0	0	0	1.26462	0	0	0	0	0
FBgn0027594	drpr	_5	0	0	0	0	0	0	0.802795	0.29278	0.29278	0	0	0
FBgn0027603	Ulp1	_5	0	0	0	0	0	0	0.900855	0.392406	0.392406	0.201798	0	0
FBgn0027607	CG8230	_5	0	0.204283	0	0.423295	0	0	0.669798	0.136874	0.136874	0	0.228856	0
FBgn0027609	morgue	_5	0.870833	0.0262341	0.0262341	0.0537906	0	0	1.30357	0.0742459	0.0742459	0.517717	0	0
FBgn0027654	jdp	_5	0	2.08999	0	0	0	0	0.791429	1.54838	0.791429	0	0.40554	0
FBgn0027655	htt	_5	0	0	0	0.249412	0	0	2.91629	0	0	0	0	0
FBgn0027779	VhaSFD	_5	0.128347	0.971696	0.128347	0.212571	0.84895	0.212571	1.39527	1.44558	1.39527	0.459609	0	0
FBgn0027873	Cpsf100	_5	0.312302	0.797717	0.312302	0.640812	0.151588	0.151588	1.2056	1.01855	1.01855	0	0	0
FBgn0027932	Akap200	_5	0.357479	1.3776	0.357479	0.34796	0.103031	0.103031	1.30596	0.0448703	0.0448703	0.65619	0.407141	0.407141
FBgn0028325	Pdha	_5	0.256517	1.94623	0.256517	0.35442	1.35572	0.35442	2.81413	2.40808	2.40808	0.815371	2.70518	0.815371
FBgn0028400	Syt4	_5	0	0	0	0	0	0	1.59661	0.477872	0.477872	0	0	0
FBgn0028494	CG6424	_5	0	0	0	0	0.0331355	0	1.21317	1.84152	1.21317	0	0	0
FBgn0028497	CG3530	_5	0.0648162	0	0	0	0	0	4.18456	0.50032	0.50032	0	0	0
FBgn0028554	x16	_5	0.392325	0.817586	0.392325	0.901796	0.393337	0.393337	2.31278	0.919728	0.919728	0	0	0
FBgn0028573	prc	_5	0.568046	0	0	0	1.42562	0	2.65125	1.07981	1.07981	0.398714	0.0145489	0.0145489
FBgn0028577	hfp	_5	0	0	0	0.0553807	0.0177278	0.0177278	1.07379	1.00032	1.00032	0.328856	0	0
FBgn0028622	qsm	_5	0.724456	0	0	0	1.31805	0	0	2.08336	0	0	0	0
FBgn0028879	CG15270	_5	0.280208	0	0	0	0	0	0.885176	0	0	0	0	0
FBgn0028965	A16	_5	0	0.477938	0	0	0	0	2.21851	1.13209	1.13209	0	0.477793	0
FBgn0028992	sds22	_5	0	0.785082	0	1.02119	0.482267	0.482267	1.80655	0.851051	0.851051	0	0	0
FBgn0029114	Tollo	_5	0	0	0	0	0	0	1.64681	0	0	0	0	0
FBgn0029663	CG10804	_5	0	0	0	0	0	0	1.76342	3.50006	1.76342	0	0	0
FBgn0029706	CG3626	_5	0.177134	1.42763	0.177134	0.306659	0.640197	0.306659	1.31163	2.24778	1.31163	0.731287	0.75335	0.731287
FBgn0029715	CG11444	_5	0.265813	0.207719	0.207719	0.249232	0	0	1.53266	0	0	0	0	0
FBgn0029778	RhoGAP5A	_5	0	0	0	0	0.0152115	0	1.16584	0.524496	0.524496	0	0	0
FBgn0029893	CG14442	_5	0	0	0	0	0	0	1.37883	0	0	0	0	0
FBgn0029943	Atg5	_5	0	0.212663	0	1.35432	0.379195	0.379195	0.997793	1.4181	0.997793	0	0.371934	0
FBgn0029958	Pdp	_5	0.233959	0.88206	0.233959	0	0.881589	0	0.419955	1.30062	0.419955	0.532625	0.721349	0.532625
FBgn0029976	snz	_5	0	0.13196	0	0	0	0	0.740553	0	0	0.276916	0.069321	0.069321
FBgn0030011	Gbeta5	_5	0	0	0	0	0	0	1.54524	1.20125	1.20125	0	0	0
FBgn0030060	CG2004	_5	0.859199	0.364471	0.364471	0.185747	0.814334	0.185747	0.128161	2.33787	0.128161	0.0586866	0.0067975	0.0067975
FBgn0030244	CG2157	_5	0	0	0	0	0	0	0	3.27974	0	0	0	0
FBgn0030301	HP5	_5	0	0	0	0	0	0	1.58617	1.62289	1.58617	0	0	0
FBgn0030305	Uba5	_5	0	0	0	0.268811	2.02047	0.268811	0.542618	0.40328	0.40328	1.00075	0	0
FBgn0030346	CG11802	_5	0	0	0	0	0	0	1.95289	0.42143	0.42143	0	0	0
FBgn0030366	Usp7	_5	0	0.194624	0	0.543631	0	0	1.15086	1.32434	1.15086	0.102465	0	0
FBgn0030412	Tomosyn	_5	0.246093	0	0	0	1.59276	0	0.992841	1.55985	0.992841	0.0117634	0	0
FBgn0030478	CG1640	_5	0.0468747	0.717097	0.0468747	0.610095	2.97339	0.610095	3.10712	1.66858	1.66858	0.215202	0.633564	0.215202
FBgn0030484	GstT4	_5	0.428817	0.0826331	0.0826331	0	1.85652	0	0.893858	0.309288	0.309288	0.403009	0	0
FBgn0030499	CG11178	_5	0	0	0	0.527004	0	0	1.1221	0.706243	0.706243	0.147274	0	0
FBgn0030512	Nadsyn	_5	0.183911	0.570939	0.183911	0.351494	0.839081	0.351494	0.847792	0.645172	0.645172	0.178862	0.526901	0.178862
FBgn0030653	CG7860	_5	0.149741	0.33156	0.149741	2.43734	0.507809	0.507809	3.08033	2.31382	2.31382	0	0.140744	0
FBgn0030678	CG11679	_5	0	0.792326	0	0.616955	1.21389	0.616955	0.979145	1.45801	0.979145	0.218799	1.19702	0.218799
FBgn0030683	CG8239	_5	0.457959	1.21766	0.457959	0.628508	0	0	1.04129	0.806887	0.806887	0	0	0
FBgn0030685	Graf	_5	0	0	0	0	0.292855	0	1.08486	0.517599	0.517599	0	0	0
FBgn0030692	mRpS30	_5	0.300986	0	0	0	0.0814187	0	0.930421	0.275903	0.275903	0	0	0
FBgn0030699	CG8578	_5	0	0.137778	0	0.24098	0.0540524	0.0540524	1.8206	1.27812	1.27812	0.329916	0	0
FBgn0030724	Nipsnap	_5	0	0.113032	0	0.553471	0.182297	0.182297	1.54826	1.40147	1.40147	0	0.297658	0
FBgn0030854	CG8289	_5	0	0	0	0	1.32075	0	1.36441	0	0	0	0.922082	0
FBgn0030876	CG6762	_5	1.27559	0.128352	0.128352	1.25973	0	0	0.958327	0	0	0	0	0
FBgn0030895	CG7135	_5	0	0	0	0	0	0	1.0022	0	0	0	0	0
FBgn0030897	Frq1	_5	0	0	0	0	0	0	1.77624	0.295664	0.295664	0	0	0
FBgn0031020	Naa15-16	_5	0.365753	1.03337	0.365753	0.310077	1.9403	0.310077	1.73667	0.111247	0.111247	0	0	0
FBgn0031048	CG12237	_5	0.674484	0	0	0.722808	0	0	0.80105	0.720678	0.720678	0	0	0
FBgn0031050	Arp10	_5	0	0	0	1.30789	0.268133	0.268133	1.56328	1.80898	1.56328	0	0	0
FBgn0031064	CG12531	_5	0	1.06621	0	0	0	0	1.22393	0.0562438	0.0562438	0	0	0
FBgn0031078	Nup205	_5	0.380718	0.47152	0.380718	0.0629321	1.39734	0.0629321	1.46616	2.47544	1.46616	0.954716	0.0978433	0.0978433
FBgn0031164	CG1724	_5	0.892324	0.452041	0.452041	0	0.4171	0	1.07146	0.532244	0.532244	0.481514	0.287466	0.287466
FBgn0031229	CG3436	_5	0.416785	0.966763	0.416785	0.645068	1.71967	0.645068	1.63628	1.21595	1.21595	0	0	0
FBgn0031266	Sf3b1	_5	1.18966	0.312172	0.312172	0.751514	0.547542	0.547542	3.33218	1.38606	1.38606	0	0	0
FBgn0031306	CG4577	_5	1.56049	0	0	0	0	0	2.92414	1.67502	1.67502	0.00233696	0	0
FBgn0031318	CG4887	_5	0.344901	0	0	0.545046	0.181917	0.181917	1.18506	1.51914	1.18506	0	0	0
FBgn0031319	CG4896	_5	0.344901	0	0	0.545046	0.181917	0.181917	1.18506	0.834249	0.834249	0	0	0
FBgn0031374	Wdr62	_5	0.263593	0	0	0	0.0826981	0	1.32678	0.169844	0.169844	0	0	0
FBgn0031377	CG15356	_5	0	0	0	0	0	0	1.61843	0.310718	0.310718	0.202155	0.158632	0.158632
FBgn0031390	tho2	_5	0.0798156	0.802451	0.0798156	0	0.55756	0	1.02863	0.232769	0.232769	0	0.376652	0
FBgn0031450	Hrs	_5	0.360775	0.192552	0.192552	0.814771	0	0	0.89885	1.01393	0.89885	0.233028	0.338327	0.233028
FBgn0031493	Sf3b2	_5	0.595767	0.673774	0.595767	1.09195	0.381899	0.381899	3.17181	1.18569	1.18569	0	0	0
FBgn0031589	CG3714	_5	0	1.19264	0	0	0.25897	0	2.79028	0.714814	0.714814	0.846119	0.278385	0.278385
FBgn0031590	CG3702	_5	0.485859	0.466506	0.466506	1.04848	0.400288	0.400288	0.115332	3.08342	0.115332	0	0.524341	0
FBgn0031601	Dim1	_5	0.344806	0	0	0.545545	0.181096	0.181096	1.18786	0.842802	0.842802	0	0	0
FBgn0031632	CG15628	_5	0	0	0	0	0	0	0.987502	0.334483	0.334483	0	0	0
FBgn0031657	CG3756	_5	0.957438	0	0	0	0.28354	0	0	2.67137	0	0	0	0
FBgn0031673	CG31650	_5	0	0	0	0	0	0	1.54612	0	0	1.22924	0.0622246	0.0622246
FBgn0031728	Hsp60C	_5	0	0.317791	0	0	0.66021	0	1.3471	0.696155	0.696155	0.306282	0.310456	0.306282
FBgn0031759	lid	_5	0	0	0	0	0.0236181	0	0.984325	0.297664	0.297664	0	0	0
FBgn0031822	Phf5a	_5	0.345049	0	0	1.58243	0.182125	0.182125	1.23484	1.08168	1.08168	0	0	0
FBgn0031836	CG11050	_5	1.33345	0	0	0	0.357024	0	0.895119	0.453033	0.453033	0	0.930295	0
FBgn0031945	CG7191	_5	0	0	0	0	1.03664	0	0	1.89462	0	0	0	0
FBgn0032030	Wdr82	_5	0	0	0	0.710123	0	0	1.41877	0	0	0	0	0
FBgn0032160	CG4598	_5	0	2.08725	0	0.263512	1.55811	0.263512	2.16485	3.58171	2.16485	0.657562	0.977501	0.657562
FBgn0032166	CG4619	_5	0	0	0	0	0.404991	0	0.839774	0	0	0	0	0
FBgn0032200	CG5676	_5	0.738021	0	0	0.0311255	0	0	0	2.22663	0	0.427235	0	0
FBgn0032217	CG4972	_5	0.734838	1.49179	0.734838	0	0.544354	0	2.08501	0.0750439	0.0750439	0	0	0
FBgn0032240	CG17768	_5	0.400519	0.315291	0.315291	1.12421	0.465354	0.465354	0.925517	1.73736	0.925517	0.191024	0.620324	0.191024
FBgn0032242	CG5355	_5	0	0.615549	0	0	0.885141	0	0.51619	1.49993	0.51619	1.28397	0	0
FBgn0032246	Wdfy2	_5	1.73076	0	0	0.0863068	0.852589	0.0863068	2.91655	1.14984	1.14984	0.65825	0.311487	0.311487
FBgn0032250	holn1	_5	0.485399	0	0	0.567131	0.829939	0.567131	1.9611	1.04765	1.04765	0	0	0
FBgn0032256	RluA-2	_5	0	0.945116	0	0	0.121894	0	1.01159	0.661504	0.661504	0	0	0
FBgn0032397	Tom70	_5	0	0	0	0.845065	0.955621	0.845065	3.36698	1.94478	1.94478	0.720848	0.142781	0.142781
FBgn0032409	Ced-12	_5	0	0.693172	0	0.565722	0	0	3.51254	0.0740492	0.0740492	0	0	0
FBgn0032454	CG5787	_5	0.24775	0.571604	0.24775	0	1.38668	0	1.72406	1.56131	1.56131	0	0	0
FBgn0032488	CG16812	_5	0	0	0	0	0	0	2.19408	1.60222	1.60222	0	0.510917	0
FBgn0032516	Ing5	_5	0	0	0	0	0	0	0.813493	0	0	0	0	0
FBgn0032634	Rpb11	_5	0.24345	0	0	0.457802	0.156851	0.156851	1.64113	0.74623	0.74623	0	0	0
FBgn0032690	CG10333	_5	1.21243	0.472144	0.472144	1.57909	0.292961	0.292961	2.65408	2.56706	2.56706	0	0	0
FBgn0032704	Jwa	_5	0.0880412	0	0	0	0.680724	0	1.92305	2.29481	1.92305	0	0.111792	0
FBgn0032717	CG10600	_5	0	0	0	0.0562838	0	0	0.826583	0	0	0	0	0
FBgn0032721	CG10602	_5	0.81165	0.538181	0.538181	0.313974	0.603168	0.313974	1.11363	1.14282	1.11363	0.0366919	0.157584	0.0366919
FBgn0032727	CG10623	_5	0.358639	0.662867	0.358639	0	1.73531	0	0.902081	0.0116629	0.0116629	0.307578	0.558289	0.307578
FBgn0032731	Swip-1	_5	0	0	0	0.419165	1.0916	0.419165	2.08205	0.830453	0.830453	0	0	0
FBgn0032755	CG17344	_5	0	0	0	0	0	0	1.47331	0	0	0	0	0
FBgn0032796	CG10188	_5	0	0	0	0	0	0	3.63678	1.53545	1.53545	0	0	0
FBgn0032821	CdGAPr	_5	0	0	0	0	0.0331355	0	1.50356	0.578285	0.578285	0	0	0
FBgn0032859	Arpc2	_5	1.1977	0.336557	0.336557	0.674628	0.778691	0.674628	0.836734	0.676193	0.676193	0	0.502449	0
FBgn0032870	CG2608	_5	0	0	0	0	0	0	2.49107	0	0	0	0.700856	0
FBgn0032886	CG9328	_5	0	0	0	0	0	0	1.85149	0.053217	0.053217	0.452688	0.0226198	0.0226198
FBgn0032916	CG9257	_5	0.00918407	0	0	0.316893	0.27278	0.27278	0.784063	0	0	0	0.91024	0
FBgn0032986	CG3262	_5	0	2.09249	0	0	0	0	2.17529	0.528289	0.528289	0.190822	0.161589	0.161589
FBgn0033005	CG3107	_5	0	2.16458	0	0	1.06304	0	2.33958	0.4312	0.4312	0.0386444	0.987376	0.0386444
FBgn0033074	tomboy40	_5	0	0.106861	0	0.96754	1.21265	0.96754	1.70431	0.491589	0.491589	0.408133	0.274445	0.274445
FBgn0033159	Dscam1	_5	0	0	0	0	0	0	1.32362	0.651052	0.651052	0	0	0
FBgn0033179	p47	_5	0.726801	1.85756	0.726801	0.835584	0.251347	0.251347	2.73033	2.20628	2.20628	0.822793	3.36971	0.822793
FBgn0033188	Drat	_5	1.41017	0	0	0.158772	0	0	3.31768	1.09323	1.09323	0	0	0
FBgn0033191	CG1598	_5	0.299651	1.01984	0.299651	0.313198	1.93931	0.313198	2.17423	0	0	0.107193	0	0
FBgn0033209	CG12107	_5	0	0	0	0	0	0	0.834259	0.120097	0.120097	0	0	0
FBgn0033210	U2A	_5	1.13785	0.437924	0.437924	1.09704	0.393337	0.393337	1.3314	2.20011	1.3314	0	0	0
FBgn0033317	CG8635	_5	1.22302	0.450483	0.450483	0	0.0295902	0	1.16255	1.05509	1.05509	0.0832985	1.28282	0.0832985
FBgn0033482	CG1371	_5	0.0226973	0.685352	0.0226973	0	0.707133	0	3.02804	0.957166	0.957166	0.0392205	0	0
FBgn0033528	trsn	_5	0	0.418818	0	0.181749	0.30492	0.181749	0.91412	0.604048	0.604048	0	0	0
FBgn0033538	CG11883	_5	0	0	0	0	0	0	0	2.63062	0	0	0	0
FBgn0033566	CG18004	_5	0	0	0	0	0	0	1.57452	0.875372	0.875372	0	0	0
FBgn0033571	Rpb5	_5	0.429538	0.635033	0.429538	0.73649	2.4688	0.73649	1.34045	0.994369	0.994369	0	0	0
FBgn0033597	Cpr47Ea	_5	1.81586	0	0	0	0	0	0.129108	2.42598	0.129108	0	0.271436	0
FBgn0033602	Cpr47Ee	_5	0	0.615234	0	0	0	0	0.317363	2.80232	0.317363	0.279411	0.00966071	0.00966071
FBgn0033669	PI31	_5	0.184284	0.0936424	0.0936424	0.732714	0.701187	0.701187	1.92498	0.464665	0.464665	0.534457	0.919003	0.534457
FBgn0033673	CG8298	_5	0	0	0	0	0	0	2.35326	0	0	0	0	0
FBgn0033679	CG8888	_5	0	1.55842	0	0	1.0551	0	2.01868	0	0	0.202121	1.2928	0.202121
FBgn0033710	CG17739	_5	0.143242	0	0	0.0457149	0	0	2.40201	0	0	0	0.0304303	0
FBgn0033712	mIF3	_5	0.710012	0	0	0.408917	0.678148	0.408917	1.54631	0.569496	0.569496	0.736048	0.116024	0.116024
FBgn0033739	Dyb	_5	0	0	0	0	0.799564	0	1.8197	0.0867096	0.0867096	0	0	0
FBgn0033778	Balat	_5	0	0	0	0	0.503035	0	0.575548	1.95533	0.575548	0	0	0
FBgn0033842	cbc	_5	0.344806	0.133239	0.133239	0.545545	0.181096	0.181096	1.18786	0.842802	0.842802	0	0	0
FBgn0033846	mip120	_5	0.965815	0.0108456	0.0108456	2.47009	0	0	10.1012	7.84142	7.84142	0	0	0
FBgn0033901	O-fut1	_5	0.261407	0	0	0	0	0	1.20349	0	0	0.0345325	0	0
FBgn0033924	CG8613	_5	0.805003	0.384145	0.384145	0	0	0	1.59295	0.762908	0.762908	0	0.434502	0
FBgn0033951	CG10139	_5	0	0	0	0	0	0	0.95915	0.214966	0.214966	0	0	0
FBgn0033972	Ciao1	_5	0.0572288	0.383096	0.0572288	0.373336	0	0	1.06252	0.745271	0.745271	0	0	0
FBgn0034027	CG8187	_5	0.796104	0.026712	0.026712	0	0.462953	0	0.861015	0.8069	0.8069	0.871115	0.494352	0.494352
FBgn0034068	casp	_5	0.0318132	0.548782	0.0318132	1.36636	0.789623	0.789623	1.08826	0.856625	0.856625	0.292412	0	0
FBgn0034084	CG8435	_5	0.00693216	0	0	0	0.178987	0	0.960135	0	0	0	0	0
FBgn0034118	Nup62	_5	0	0	0	0	0.633188	0	1.29595	0.905426	0.905426	0.480454	0	0
FBgn0034242	CG14480	_5	0.119039	0.852874	0.119039	0	0.778261	0	3.61311	0	0	0.838418	0.129074	0.129074
FBgn0034331	CG15067	_5	0.324516	0.325379	0.324516	0.726722	0.0204487	0.0204487	1.09134	0	0	0.399482	0.603833	0.399482
FBgn0034345	CG5174	_5	0	1.05924	0	0	0.911437	0	1.65679	1.71289	1.65679	0.133372	0.63979	0.133372
FBgn0034430	mip40	_5	0.960321	0	0	2.28281	0	0	9.26572	6.65307	6.65307	0	0	0
FBgn0034455	CG11007	_5	0.0740082	0	0	0.46343	0	0	1.16608	1.95974	1.16608	0	0	0
FBgn0034500	CG11200	_5	0	1.26801	0	0	0.221675	0	1.10475	0	0	0	0	0
FBgn0034537	DMAP1	_5	0	0	0	0	0	0	0.850631	0.198284	0.198284	0	0	0
FBgn0034585	Rbpn-5	_5	0	0.151949	0	0.216025	0	0	0.213772	2.12908	0.213772	0	0	0
FBgn0034650	NC2alpha	_5	0	0	0	0	0	0	0.702923	0	0	0.0996387	0	0
FBgn0034691	Synj	_5	0.720411	0	0	0	0	0	0.873588	1.25161	0.873588	0.133813	0.729775	0.133813
FBgn0034699	CG13504	_5	0	0	0	0	0	0	0.782326	0	0	0.171958	0.833788	0.171958
FBgn0034722	Rtf1	_5	0.105691	0	0	0	0.722951	0	1.31584	0.0618194	0.0618194	0	0	0
FBgn0034744	Vps20	_5	0	0	0	0	0	0	1.91902	0.986459	0.986459	0.345179	0	0
FBgn0034753	CG2852	_5	0.866343	1.17683	0.866343	1.23487	2.74216	1.23487	1.79166	0.322464	0.322464	1.16979	0	0
FBgn0034791	EMC8-9	_5	0.00318038	0	0	0	1.05786	0	0.0815951	1.92296	0.0815951	0	0	0
FBgn0034802	CNBP	_5	1.85626	0	0	0	1.12058	0	4.44551	4.52008	4.44551	0.142381	0.1875	0.142381
FBgn0034825	Gpdh2	_5	0	0	0	0	0	0	0.545616	0.159837	0.159837	0.143405	0.783818	0.143405
FBgn0034854	Golgin245	_5	0.0739016	0	0	0	0.928688	0	1.6615	0.636443	0.636443	0	0.0760571	0
FBgn0034914	CG5554	_5	0.327777	0	0	0.964565	1.04116	0.964565	1.28425	0	0	0	0	0
FBgn0034923	Upf3	_5	0.343484	0	0	0.54208	1.16586	0.54208	1.17156	0.819464	0.819464	0	0	0
FBgn0034975	enok	_5	0	0	0	0	0	0	1.66817	0	0	0	0	0
FBgn0035026	Fcp1	_5	0	0	0	0	0	0	0.893926	0.350384	0.350384	0	0	0
FBgn0035033	CG3548	_5	0	0	0	1.43702	0	0	2.15705	1.88522	1.88522	0	0	0
FBgn0035092	Nplp1	_5	0	0	0	0	0.122311	0	3.12975	2.47407	2.47407	0.280984	1.04166	0.280984
FBgn0035162	Sf3b3	_5	1.28381	0.123276	0.123276	0.839581	0.505534	0.505534	1.31649	0.957769	0.957769	0	0	0
FBgn0035165	CG13887	_5	0.234984	0.624786	0.234984	0.0397152	0.0620144	0.0397152	2.25178	2.47458	2.25178	0.729322	1.38995	0.729322
FBgn0035181	CG9205	_5	0.161962	0	0	0	0.647875	0	1.14444	0.359586	0.359586	0	0	0
FBgn0035246	CG13928	_5	0.00233906	1.17282	0.00233906	0	0.648569	0	1.15618	0	0	0.0281116	0.626515	0.0281116
FBgn0035280	Cpr62Bb	_5	0	0.983639	0	0	0	0	0	1.69937	0	0	0.337212	0
FBgn0035281	Cpr62Bc	_5	1.06722	0	0	0	0	0	0	2.90537	0	0	0	0
FBgn0035357	MEP-1	_5	0	0	0	0	0	0	1.3633	0.404666	0.404666	0	0	0
FBgn0035371	AhcyL1	_5	0.0422028	0	0	0.020041	0.350844	0.020041	1.41558	0.156167	0.156167	0	0	0
FBgn0035383	CPT2	_5	1.23499	0	0	0.122926	0.334161	0.122926	1.16318	0.555308	0.555308	0.0755646	0.0437899	0.0437899
FBgn0035437	Strip	_5	0	0.0146388	0	0	0.0219124	0	1.11122	0	0	0	0	0
FBgn0035438	PHGPx	_5	1.62547	0.464185	0.464185	0	0.420832	0	0	2.96183	0	0.576411	0.110594	0.110594
FBgn0035471	Sc2	_5	0.385721	1.70032	0.385721	0.145627	0.321636	0.145627	0.262765	1.24354	0.262765	0	0.864495	0
FBgn0035519	CG1309	_5	0	0.231029	0	0	0	0	2.73221	0.960643	0.960643	0	0	0
FBgn0035521	VhaM9.7-a	_5	0	0	0	0	0	0	0.848298	0	0	0	0	0
FBgn0035533	Cip4	_5	0	0	0	1.0141	1.48085	1.0141	1.31741	2.77757	1.31741	0	0	0
FBgn0035540	Syx17	_5	0	0	0	0.0405515	0	0	0.879271	0.180605	0.180605	0.160422	0.0804171	0.0804171
FBgn0035593	CG4603	_5	0.333406	0.322585	0.322585	0.664646	0.55583	0.55583	0.493744	1.75546	0.493744	0.825499	0.883718	0.825499
FBgn0035601	Uev1A	_5	0	0	0	0	1.01275	0	1.34062	0	0	0.197864	0.0900021	0.0900021
FBgn0035715	CG10103	_5	0	0.0709354	0	0	0.0062435	0	1.60447	0	0	0	0	0
FBgn0035772	Sh3beta	_5	0.880471	0.03616	0.03616	0.162101	0.251881	0.162101	1.23527	0	0	0.300652	1.04831	0.300652
FBgn0035793	CG7546	_5	0.80569	0	0	0	0.453446	0	1.37709	0.263036	0.263036	0.373445	0.645626	0.373445
FBgn0035853	UbcE2M	_5	1.21939	0	0	0.47889	0.452332	0.452332	0.987803	1.17532	0.987803	0	0	0
FBgn0035872	CG7185	_5	0.0521205	0.375799	0.0521205	0.0808574	0	0	2.17117	1.29006	1.29006	0.121738	0.0516052	0.0516052
FBgn0035873	CG13670	_5	1.38532	0	0	1.72449	0	0	6.09974	0	0	0	0.0553719	0
FBgn0035987	CG3689	_5	0.609407	0.0536658	0.0536658	0.641831	0.215621	0.215621	1.87457	1.76746	1.76746	0	0	0
FBgn0035989	CG3967	_5	0	0.499575	0	0.485686	0.274691	0.274691	0.850173	0.553036	0.553036	0	0	0
FBgn0035995	CG3529	_5	0.134987	1.39349	0.134987	0.597717	1.90768	0.597717	1.92928	0.762272	0.762272	0.0496063	0.180524	0.0496063
FBgn0036058	CG6707	_5	0	0	0	1.21034	0.350445	0.350445	2.65986	1.73508	1.73508	0	0	0
FBgn0036094	CG14153	_5	0	0	0	0	0	0	0.887742	0	0	0	0	0
FBgn0036104	CG6418	_5	0.0606117	0	0	0.191516	0	0	1.05208	1.70833	1.05208	0	0	0
FBgn0036173	CG7394	_5	1.27559	0.677732	0.677732	0.272366	1.36073	0.272366	3.98385	1.8429	1.8429	0.691696	0.194747	0.194747
FBgn0036257	RhoGAP68F	_5	0	0.15645	0	0.114313	0.655596	0.114313	1.78893	0.600891	0.600891	0	0	0
FBgn0036277	CG10418	_5	1.24313	0.184619	0.184619	0.686357	0.79305	0.686357	1.30616	0.942893	0.942893	0.710887	0	0
FBgn0036286	CG10616	_5	0.105451	0	0	0	0	0	1.13994	0	0	0.498349	0	0
FBgn0036314	Sf3a2	_5	0.418338	0.23008	0.23008	0.672455	0.645699	0.645699	3.94487	2.86341	2.86341	0	0	0
FBgn0036334	CG11267	_5	0.169051	1.11777	0.169051	0	2.57794	0	2.70275	1.93505	1.93505	1.89178	0.774614	0.774614
FBgn0036372	Abp1	_5	0.743865	0.507503	0.507503	0.630523	0.66266	0.630523	2.55039	0.853592	0.853592	0.259798	0.99096	0.259798
FBgn0036415	CG7768	_5	0	0	0	0.132442	1.50502	0.132442	0.936193	0.413596	0.413596	0	0.415273	0
FBgn0036451	CG9425	_5	0.789377	0.672045	0.672045	0	0.300965	0	1.6069	0.965744	0.965744	0.994702	1.066	0.994702
FBgn0036462	mRpL39	_5	0.138462	0	0	0	0	0	1.27765	1.23532	1.23532	0.885395	0	0
FBgn0036505	CG7945	_5	0.0640254	0.979409	0.0640254	0.600334	0.110232	0.110232	1.0733	0.0170077	0.0170077	0.233548	0	0
FBgn0036612	CG4998	_5	0	0.0989613	0	0	0.0573511	0	2.6414	0.611322	0.611322	0.392148	0.0172805	0.0172805
FBgn0036622	CG4753	_5	0.251143	0	0	0	1.40408	0	2.32949	2.37024	2.32949	0.822955	0.482404	0.482404
FBgn0036623	CG4729	_5	0.790288	0	0	0	2.85154	0	1.19015	2.41785	1.19015	0.329069	0.931845	0.329069
FBgn0036624	RAF2	_5	0.695749	0	0	0.263509	0	0	1.61735	0.0243352	0.0243352	0	0	0
FBgn0036643	Syx8	_5	0.201689	0.828349	0.201689	0.765896	2.24576	0.765896	1.61376	0.455529	0.455529	0.801003	0	0
FBgn0036680	Cpr73D	_5	0.0725567	0	0	0	0	0	0	2.31489	0	0.616722	0	0
FBgn0036691	beg	_5	1.08738	0.287265	0.287265	0	0.89792	0	2.55416	1.7497	1.7497	1.52239	2.04085	1.52239
FBgn0036733	U4-U6-60K	_5	0.78369	0	0	0.602037	0.379593	0.379593	1.37574	1.09255	1.09255	0	0	0
FBgn0036805	Chmp1	_5	0	0	0	1.49378	0	0	0.790834	2.29094	0.790834	0.118581	0	0
FBgn0036828	CG6841	_5	0.355418	0.193733	0.193733	0.5872	0.537333	0.537333	2.38971	2.00185	2.00185	0	0	0
FBgn0036847	CNPYb	_5	1.74775	0.0968545	0.0968545	0.093191	0	0	0.47495	1.84378	0.47495	0.706484	0.0858136	0.0858136
FBgn0036890	CG9368	_5	0.0239829	0	0	0	0.126212	0	0.886339	0.173248	0.173248	0	0.352985	0
FBgn0036915	Prp3	_5	0	0	0	0	0	0	2.72778	0.830862	0.830862	0	0	0
FBgn0036920	CG8004	_5	0	0.16153	0	0.735741	0.223325	0.223325	1.24592	2.69736	1.24592	0.748621	0.150831	0.150831
FBgn0036921	RhoGDI	_5	0.689834	0	0	0	2.34625	0	2.26956	2.33636	2.26956	0.335877	0.806471	0.335877
FBgn0036980	RhoBTB	_5	0	0	0	0	0.0790063	0	1.63756	0.832374	0.832374	0	0	0
FBgn0037027	HIPP1	_5	0.0260508	0.0740773	0.0260508	0	0	0	1.14361	1.29944	1.14361	1.1586	0	0
FBgn0037069	Cpr78Cc	_5	0.395971	0.801812	0.395971	0	0	0	0	2.52454	0	0.859944	0.0891967	0.0891967
FBgn0037074	CG7324	_5	0.116156	0.495982	0.116156	0.152231	0	0	0	2.07232	0	0	0	0
FBgn0037098	Wnk	_5	0.0688092	0	0	0	0	0	0.462526	2.64319	0.462526	0.0369581	0.523847	0.0369581
FBgn0037121	Rpb8	_5	0.427345	0	0	2.35432	0.272591	0.272591	1.16844	0.958958	0.958958	0.0550969	0	0
FBgn0037218	aux	_5	0.334127	0.298523	0.298523	0.129182	0.507781	0.129182	1.2947	0.842401	0.842401	0.314175	0.102053	0.102053
FBgn0037231	Vps24	_5	0	0	0	0.836236	0.345287	0.345287	2.1354	2.13253	2.13253	0	0.648213	0
FBgn0037240	Cont	_5	0	0.19999	0	0.319188	0.379428	0.319188	0.188099	2.49785	0.188099	0	0.418707	0
FBgn0037307	Tim17a2	_5	0.892324	0.452041	0.452041	0	0.4171	0	1.07146	0.532244	0.532244	0.481514	0.287466	0.287466
FBgn0037310	Tim17b1	_5	0.892324	0.452041	0.452041	0	0.4171	0	1.07146	0.532244	0.532244	0.481514	0.287466	0.287466
FBgn0037344	CG2926	_5	0	0	0	0	0	0	0.964766	0.171885	0.171885	0	0	0
FBgn0037383	CG2023	_5	0	0	0	0.109501	0	0	1.68564	0	0	0	0	0
FBgn0037443	Dmtn	_5	0	0	0	0	0	0	2.53525	0	0	0	0	0
FBgn0037473	CG10068	_5	0	0	0	0.556144	0	0	0.39946	0	0	0	0	0
FBgn0037525	CG17816	_5	0	0	0	0	0	0	1.56036	0.853553	0.853553	0	0.277683	0
FBgn0037550	CG9667	_5	0	0.29584	0	0.117244	0	0	2.13016	0	0	0	0	0
FBgn0037556	CG9636	_5	0	0	0	0	0	0	0.842879	0.0238755	0.0238755	0	0	0
FBgn0037573	CG7483	_5	0.333697	0	0	0	0	0	0.958727	0.419548	0.419548	0	0.550257	0
FBgn0037644	CG11964	_5	0.211116	0	0	0	0	0	1.42053	0	0	0	0	0
FBgn0037700	CG8149	_5	0	0.568551	0	0.0537754	0.0475502	0.0475502	2.99803	1.97227	1.97227	0.126557	0.979674	0.126557
FBgn0037702	CG8176	_5	0	0	0	0	0	0	0.966479	0.54056	0.54056	0	0	0
FBgn0037707	RnpS1	_5	0.373264	0.147511	0.147511	0.853749	0.558651	0.558651	1.73819	0.90389	0.90389	0	0	0
FBgn0037713	CG16790	_5	0	0	0	0	0	0	0.791884	0	0	0	0	0
FBgn0037737	Pnn	_5	0	0	0	0	0	0	1.5086	0	0	0	0	0
FBgn0037754	CG8500	_5	0.837441	0	0	0	0	0	0.471947	2.93168	0.471947	0	0	0
FBgn0037760	FBXO11	_5	0.138115	0	0	0.611856	0.33181	0.33181	0.904514	0.411084	0.411084	0	0	0
FBgn0037843	CG4511	_5	0.29573	0	0	0	0	0	1.24214	0	0	0	0	0
FBgn0037924	CG14712	_5	0.358536	0.464733	0.358536	0.0455642	1.22274	0.0455642	2.42938	0.130009	0.130009	0.822974	0.0756248	0.0756248
FBgn0037930	CG14715	_5	0.207962	1.93382	0.207962	0.605184	0	0	2.97369	3.34316	2.97369	0	0.0262211	0
FBgn0037935	CG6834	_5	0.147978	1.10728	0.147978	0.30256	0.905445	0.30256	0	1.87457	0	0.0311006	0	0
FBgn0037976	Tk	_5	0	0	0	0.408193	0.481591	0.408193	1.2157	2.28628	1.2157	0	0	0
FBgn0038017	CG4115	_5	0	0	0	0.52689	0	0	1.06053	0	0	0.341476	0.252403	0.252403
FBgn0038018	Tim17a1	_5	0.931337	0.405501	0.405501	0	0.420212	0	1.06992	0.570292	0.570292	0.489156	0.215423	0.215423
FBgn0038065	Snx3	_5	0.160375	0.13797	0.13797	0.706438	1.36128	0.706438	1.73217	1.52444	1.52444	0.0962436	2.12304	0.0962436
FBgn0038170	CG14367	_5	0.126304	0	0	0	0	0	0.996707	0.508126	0.508126	0.061505	0	0
FBgn0038172	Adgf-D	_5	0.294846	0.573355	0.294846	0	0	0	2.95919	0	0	0	0	0
FBgn0038224	ATPsynE	_5	0.000910122	0.0225168	0.000910122	0.0103519	0.473884	0.0103519	1.36193	0.866705	0.866705	0.00414632	0	0
FBgn0038320	Sra-1	_5	0.426431	0.436078	0.426431	0.848192	0.0842705	0.0842705	3.35406	0.255076	0.255076	0	0	0
FBgn0038418	pad	_5	0	0	0	0	0	0	0.892385	0	0	0	0	0
FBgn0038476	kuk	_5	0.212782	0	0	0	0	0	3.50358	0.560658	0.560658	0	0	0
FBgn0038569	CG7218	_5	0.448272	0.693673	0.448272	0.051715	0	0	1.37704	0	0	0	0.0586635	0
FBgn0038659	EndoA	_5	1.69588	0.137396	0.137396	0.123888	0.356438	0.123888	1.94623	1.72278	1.72278	0.0970011	0.854094	0.0970011
FBgn0038686	CG5555	_5	0	0	0	0	0.161125	0	2.15855	0	0	0	0	0
FBgn0038693	unc79	_5	0	0	0	0	0	0	0.892518	0.0513829	0.0513829	0	0	0
FBgn0038747	RhoGAP92B	_5	0.0294038	0	0	0	0.388228	0	1.84994	0.825467	0.825467	0	0	0
FBgn0038787	CG4360	_5	0	0	0	0	0	0	0.787698	0.219073	0.219073	0	0	0
FBgn0038806	CG5412	_5	0.765159	0.492011	0.492011	0.754757	0	0	0.580716	0	0	0	0	0
FBgn0038837	KaiR1D	_5	0	0	0	0	0	0	0.765163	0.127341	0.127341	0	0	0
FBgn0038853	RhoGAP93B	_5	0	0	0	0	0.0331355	0	4.27366	0.790266	0.790266	0	0	0
FBgn0038858	CG5793	_5	0.421104	0	0	0	0	0	1.00612	2.11267	1.00612	0	0.440271	0
FBgn0038872	Nelf-A	_5	0	0	0	0	0	0	2.78969	1.19108	1.19108	0	0	0
FBgn0038927	CG6015	_5	0.344806	0	0	1.47207	0.623065	0.623065	1.40648	0.842802	0.842802	0	0	0
FBgn0038975	Nrx-1	_5	0	0	0	0	0.143016	0	0.890592	1.72691	0.890592	0.158407	0	0
FBgn0039066	EloA	_5	0	0	0	0	0	0	1.06565	0.715207	0.715207	0	0	0
FBgn0039081	Irk2	_5	0	0	0	0	0.385922	0	0.923131	1.85136	0.923131	0	0	0
FBgn0039110	RanBP3	_5	0.0199145	0.683304	0.0199145	0	0.77477	0	0.220131	1.73419	0.220131	0.118592	0	0
FBgn0039116	CG10375	_5	0.345049	0	0	0.66442	0.324804	0.324804	1.76073	0.970129	0.970129	0	0	0
FBgn0039130	CG5854	_5	1.70845	0	0	0.737009	1.02115	0.737009	1.74641	1.05698	1.05698	0	0	0
FBgn0039132	AP-1sigma	_5	0.36206	0.495348	0.36206	0.993123	0.472979	0.472979	1.74287	0.894025	0.894025	0.175087	0.0913585	0.0913585
FBgn0039140	Miro	_5	0	0	0	0.962978	0.198942	0.198942	2.25045	2.45596	2.25045	0	0	0
FBgn0039175	beta-PheRS	_5	0.25698	0.0782836	0.0782836	1.88342	0.527496	0.527496	2.26957	0.762486	0.762486	1.09707	0	0
FBgn0039204	CG6607	_5	0	0	0	0	0.134871	0	1.82929	0	0	0	0	0
FBgn0039205	CG13623	_5	0	0	0	0.382205	0	0	0.478442	0	0	0.0654852	0	0
FBgn0039213	atl	_5	0	0.149958	0	0.197456	1.53403	0.197456	2.14971	0.591324	0.591324	0.0211235	0	0
FBgn0039218	Rpb10	_5	0.55513	0	0	0.899051	0.462693	0.462693	1.31019	2.42017	1.31019	0	0	0
FBgn0039232	sosie	_5	0	0	0	0	0	0	1.69347	0	0	0	0	0
FBgn0039252	CG11771	_5	0.174861	1.5868	0.174861	0	0	0	1.18997	0.20363	0.20363	0	0	0
FBgn0039269	veli	_5	0.397856	0.108354	0.108354	0	2.14316	0	1.43134	3.026	1.43134	1.05752	1.38553	1.05752
FBgn0039270	PQBP1	_5	0	0	0	0	0	0	0.983748	0.688219	0.688219	0	0	0
FBgn0039321	CG10550	_5	0	2.39989	0	0.116934	1.49313	0.116934	2.0721	0.892085	0.892085	0.208869	1.15678	0.208869
FBgn0039349	Ssadh	_5	0	0.707073	0	0.37948	0.13615	0.13615	1.00577	1.41029	1.00577	1.57342	0.453625	0.453625
FBgn0039371	CG4960	_5	0.260226	0.942784	0.260226	0.268205	0	0	0	1.34676	0	0	0.813597	0
FBgn0039385	CG5913	_5	0.743887	0.377838	0.377838	0	0.302512	0	2.90046	0.871522	0.871522	1.4959	0.98744	0.98744
FBgn0039402	Vps2	_5	0	0	0	0.244587	1.33548	0.244587	1.2724	0.507072	0.507072	0.375133	0.592089	0.375133
FBgn0039464	CG6330	_5	0	0	0	0	0	0	0.905984	3.87515	0.905984	1.47688	1.31205	1.31205
FBgn0039481	Cpr97Eb	_5	0	0.0143473	0	0	0	0	1.87658	1.90731	1.87658	0.598519	3.27925	0.598519
FBgn0039555	mRpS22	_5	0.432909	1.05811	0.432909	0	0.94011	0	3.27855	0	0	1.30112	0.382694	0.382694
FBgn0039566	CG4849	_5	1.3404	0	0	0.751865	1.21508	0.751865	2.73603	2.13556	2.13556	0	0	0
FBgn0039600	CG1646	_5	0.235553	0	0	0	0.661486	0	0.747944	1.1885	0.747944	0	0	0
FBgn0039635	CG11876	_5	0.420074	0.434964	0.420074	0.206501	1.18944	0.206501	0.606167	1.48065	0.606167	0.335416	0.838215	0.335416
FBgn0039730	CG7903	_5	0	0	0	0.951824	0	0	1.72751	1.45774	1.45774	0	0	0
FBgn0039735	Nph	_5	0.0837622	0.892433	0.0837622	1.43176	0.419649	0.419649	2.21227	2.01142	2.01142	0.173461	0.358186	0.173461
FBgn0039743	CG7946	_5	0.00862443	0	0	0	0	0	2.37858	1.13678	1.13678	1.31718	0.612976	0.612976
FBgn0039774	CDase	_5	0	0	0	0	1.14224	0	2.06887	0	0	0.211585	0	0
FBgn0039776	PH4alphaEFB	_5	0.232941	0.00465879	0.00465879	0	0	0	0.886945	0	0	0	0	0
FBgn0039800	Npc2g	_5	0.922129	1.16057	0.922129	0	0	0	1.72624	0	0	0	0.000638493	0
FBgn0039883	RhoGAP100F	_5	0	0	0	0	0.0331355	0	3.71803	2.2747	2.2747	0	0	0
FBgn0039900	Syt7	_5	0	0	0	0	1.10383	0	0	2.66766	0	0	0	0
FBgn0039911	CG1909	_5	0	0	0	0	0	0	1.81386	0.233652	0.233652	0	0	0
FBgn0039924	PIP4K	_5	0.0734303	0	0	0	0	0	0.678222	0	0	0.426342	0.109008	0.109008
FBgn0039936	Gyf	_5	0.0635445	0.201216	0.0635445	0	0	0	1.42417	1.68182	1.42417	0	0	0
FBgn0039944	CG17162	_5	0	0	0	0	0	0	2.83889	0	0	0	0	0
FBgn0039965	CG13865	_5	0.110188	0.0986017	0.0986017	0	0.251563	0	1.78908	0.428265	0.428265	1.37263	0.143757	0.143757
FBgn0039994	conu	_5	0	0	0	0	0.0331355	0	1.18197	0.540635	0.540635	0	0	0
FBgn0040056	CG17698	_5	0	0	0	0.0245602	0	0	1.24655	0	0	0	0.0348893	0
FBgn0040068	Vav	_5	0	0	0	0.522681	0	0	2.54531	0.799286	0.799286	0	0	0
FBgn0040075	rept	_5	0.567466	0.598412	0.567466	0.350868	0	0	0.963507	0	0	0.468939	0.559235	0.468939
FBgn0040206	krz	_5	1.04472	2.19988	1.04472	0.584536	1.16334	0.584536	3.0545	3.24889	3.0545	0.233747	0.114976	0.114976
FBgn0040235	c12.1	_5	0	0	0	0	0	0	2.28403	0	0	0	0	0
FBgn0040273	Spt5	_5	0.0272962	0	0	0	0	0	0.836485	0.0144912	0.0144912	0	0	0
FBgn0040283	SMC1	_5	0.307119	0.652242	0.307119	1.33719	0.212103	0.212103	1.31058	0.906156	0.906156	0	0	0
FBgn0040297	Nhe2	_5	0	0.112524	0	0.253098	0.0134662	0.0134662	1.00377	2.68431	1.00377	0.0168129	0	0
FBgn0040372	G9a	_5	0	0	0	0	0	0	0.914515	0.108246	0.108246	0	0	0
FBgn0040384	CG32795	_5	0.128959	0.478089	0.128959	0	0.796022	0	1.26411	1.9364	1.26411	0.538562	1.1982	0.538562
FBgn0040493	grsm	_5	0	0.0960326	0	0.107174	0	0	1.79039	0.97169	0.97169	0.80495	1.02019	0.80495
FBgn0040502	CG8343	_5	0	0.645164	0	0	0.930208	0	0.518697	1.99131	0.518697	0	0	0
FBgn0040634	CG4186	_5	0	0	0	0	0.514888	0	1.34396	0	0	0	0.510912	0
FBgn0040687	CG14645	_5	1.95342	0	0	0	0.500484	0	0	1.39837	0	0	0	0
FBgn0040752	Prosap	_5	0	0	0	0	0	0	0.973606	1.70775	0.973606	0	0	0
FBgn0040899	CG17776	_5	0	0	0	0.604853	0.879515	0.604853	1.66517	0	0	0.0371932	0.656006	0.0371932
FBgn0041582	tamo	_5	0	0	0	0	0	0	2.49108	0	0	0	0	0
FBgn0041781	SCAR	_5	0.298176	0.152841	0.152841	3.01254	0.141959	0.141959	4.89769	0.899433	0.899433	0	0	0
FBgn0042111	CG18766	_5	0	0	0	0	0	0	1.81552	0.522248	0.522248	0	0	0
FBgn0042132	CG18809	_5	0	0	0	0	0	0	1.03602	0	0	0	0	0
FBgn0042138	CG18815	_5	0	0	0	0	0	0	1.38419	0.551225	0.551225	0	0.475161	0
FBgn0042696	NfI	_5	0	0	0	0.514463	0	0	0.515523	0	0	0	0	0
FBgn0043456	CG4747	_5	0	0.774701	0	0	0.816274	0	0.928709	2.07183	0.928709	0.1281	0.210304	0.1281
FBgn0044324	Chro	_5	0.0991237	1.00835	0.0991237	0.187903	0.243764	0.187903	3.46877	2.05828	2.05828	2.11139	1.66439	1.66439
FBgn0044826	Pak3	_5	0.0411485	0.154941	0.0411485	0	0.255437	0	1.13283	0.304277	0.304277	0	0	0
FBgn0045862	btz	_5	0.447514	0	0	0	0	0	1.49762	0.65069	0.65069	0	0	0
FBgn0046704	Liprin-alpha	_5	0	0	0	0	0	0	1.02524	0.467737	0.467737	0	0	0
FBgn0050101	CG30101	_5	0.383209	0.034742	0.034742	0	0	0	0.22456	2.86837	0.22456	2.66924	2.7192	2.66924
FBgn0050122	CG30122	_5	0.564125	0.0964324	0.0964324	1.52423	0.712031	0.712031	2.65625	1.58672	1.58672	0.211086	0	0
FBgn0050372	Asap	_5	0.0103684	0.0398939	0.0103684	0	0.137552	0	1.42562	1.08378	1.08378	0.642729	0.594961	0.594961
FBgn0051155	Rpb7	_5	0.24345	0.0279069	0.0279069	0.457802	0.156851	0.156851	1.12223	0.74623	0.74623	0	0	0
FBgn0051158	Efa6	_5	0	0	0	0.0890387	0	0	1.8279	3.42436	1.8279	0	0	0
FBgn0051184	LSm3	_5	0.235245	0	0	0.189219	1.24122	0.189219	0.722156	0.866351	0.722156	0.0978278	0	0
FBgn0051363	Jupiter	_5	0	0.553014	0	0.0790993	0.631258	0.0790993	1.5177	0.350171	0.350171	0	0.369492	0
FBgn0051550	CG31550	_5	0.334186	0.496441	0.334186	0.524878	0.170189	0.170189	1.72101	0.958028	0.958028	0	0	0
FBgn0051638	CG31638	_5	0	0	0	0	0	0	1.2265	0.273298	0.273298	0	0	0
FBgn0051663	CG31663	_5	0	0	0	0	0	0	1.32061	0.946354	0.946354	0	0	0
FBgn0051719	RluA-1	_5	0	0.446725	0	0	0	0	0.997008	0.627947	0.627947	0	0	0
FBgn0051721	Trim9	_5	0	0	0	0	0	0	0.859275	0	0	0	0	0
FBgn0051992	gw	_5	0.213649	0.195379	0.195379	0.676823	0.143802	0.143802	1.20241	2.91169	1.20241	0	0.00631153	0
FBgn0052029	Cpr66D	_5	0.0107946	0.903376	0.0107946	0	0	0	0	3.53089	0	0	0.0761313	0
FBgn0052062	Rbfox1	_5	0	0	0	0	0	0	1.57669	0.484907	0.484907	0	0.185276	0
FBgn0052264	CG32264	_5	0	0	0	0	0	0	2.25203	1.7323	1.7323	0	0	0
FBgn0052267	CG32267	_5	0	0	0	0	0	0	1.51858	0	0	0	0	0
FBgn0052638	CG32638	_5	1.66485	0.63199	0.63199	0.401669	0	0	1.28195	0.0157212	0.0157212	0.908322	0	0
FBgn0053208	Mical	_5	0	0	0	0.691861	0.803918	0.691861	1.6023	0	0	0	0	0
FBgn0053517	Dop2R	_5	0	0	0	0	0	0	1.76179	0.763452	0.763452	0	0	0
FBgn0053519	Unc-89	_5	0.0549483	1.37059	0.0549483	0	0.552835	0	0.937051	0.0921948	0.0921948	0	0.392779	0
FBgn0063498	GstE2	_5	0	1.30284	0	0.505	3.55446	0.505	2.1909	3.94499	2.1909	0	1.37267	0
FBgn0066101	LpR1	_5	0	0	0	0	0	0	1.34325	0	0	0	0	0
FBgn0083228	Frq2	_5	0	0	0	0	0	0	2.70784	1.34294	1.34294	0.398014	0	0
FBgn0085382	CG34353	_5	0	0	0	0	0	0	0.740805	0	0	0	0	0
FBgn0085412	CG34383	_5	0	0	0	0	0	0	1.2843	0.039643	0.039643	0	0	0
FBgn0085417	natalisin	_5	0	0	0	0	0	0	0.90797	0	0	0	0	0
FBgn0085421	Epac	_5	0	0	0	0	0	0	0.869068	2.15033	0.869068	0	0	0
FBgn0085434	NaCP60E	_5	0	0	0	0.0693104	0	0	1.28747	0	0	0	0	0
FBgn0085447	sif	_5	0	0	0	0	0	0	2.45364	0.301814	0.301814	0	0.356686	0
FBgn0086129	snama	_5	0.333378	0	0	0.296353	0	0	2.11134	0.776579	0.776579	0	0	0
FBgn0086348	se	_5	0.0556891	0.526082	0.0556891	0	0.251749	0	1.09281	1.16279	1.09281	0.546313	0.0740945	0.0740945
FBgn0086356	tum	_5	0	0	0	0	0	0	0.73046	0.179834	0.179834	0	0	0
FBgn0086370	sra	_5	0	0.499464	0	0	0.0842526	0	2.48424	0.797373	0.797373	0	0	0
FBgn0086372	lap	_5	0	0	0	0	1.19673	0	1.22963	0.633931	0.633931	0.0353573	0.797627	0.0353573
FBgn0086442	mib2	_5	0	0	0	0.355403	0	0	1.24592	0	0	0	0	0
FBgn0086656	shrb	_5	0	0.780639	0	1.30161	0.0476384	0.0476384	1.66919	1.70954	1.66919	0	0.713123	0
FBgn0086712	Egm	_5	2.0158	0	0	2.47555	0	0	7.97889	0	0	0	0.290564	0
FBgn0086785	Vps36	_5	0	0	0	0.257529	0.173339	0.173339	1.02339	0	0	0	0	0
FBgn0086913	Rab26	_5	0	0	0	0	0	0	1.53125	0.220696	0.220696	0	0	0
FBgn0087002	apolpp	_5	0.608381	1.11677	0.608381	0	0	0	0.854341	0.380049	0.380049	0.726251	0.593003	0.593003
FBgn0250785	vari	_5	0.813167	0.242871	0.242871	0.835005	0.191824	0.191824	0.673231	0	0	0.0914759	0	0
FBgn0250788	beta-Spec	_5	0	0.928717	0	0.638084	0.909764	0.638084	1.32451	1.20765	1.20765	0.101173	0.722387	0.101173
FBgn0250791	alphaSnap	_5	0.57654	0	0	1.85915	0.468774	0.468774	1.58015	1.82133	1.58015	0.0978331	1.84543	0.0978331
FBgn0250906	Pgk	_5	1.21743	0.0675978	0.0675978	0	0.417224	0	2.24779	1.49892	1.49892	1.47575	0.895181	0.895181
FBgn0259171	Pde9	_5	0	0	0	0	0	0	0.137354	3.39311	0.137354	0	0	0
FBgn0259176	bun	_5	0	0	0	0	0.160779	0	2.32952	0.511315	0.511315	0	0	0
FBgn0259178	5PtaseI	_5	0.0129805	0	0	0	0	0	1.09704	0.189913	0.189913	0	0.023089	0
FBgn0259212	cno	_5	0	0.501884	0	0	0	0	1.55258	2.33386	1.55258	0.148119	0	0
FBgn0259214	PMCA	_5	0	0.0340431	0	1.20584	0.141938	0.141938	3.01876	0.984995	0.984995	0.893027	0.79049	0.79049
FBgn0259246	brp	_5	0	0	0	0	0	0	1.22396	1.0619	1.0619	0	0.435177	0
FBgn0259785	pzg	_5	0	0.799846	0	0	0.371147	0	0.656965	0.602835	0.602835	0	0	0
FBgn0259978	vlc	_5	1.02002	0.218314	0.218314	0	0	0	1.27492	0.899594	0.899594	0.944739	0.235773	0.235773
FBgn0260003	Dys	_5	0.525941	0.274776	0.274776	0.257678	1.90152	0.257678	0.524999	0.253172	0.253172	0.267143	0.002676	0.002676
FBgn0260400	elav	_5	0	0	0	0	0.461083	0	0.0149978	2.39673	0.0149978	0.283304	0	0
FBgn0260439	Pp2A-29B	_5	0.38072	0.225672	0.225672	2.74648	0.12242	0.12242	2.05953	2.26912	2.05953	1.28093	0.228539	0.228539
FBgn0260446	GABA-B-R1	_5	0	0	0	0	0	0	1.18531	0	0	0	0	0
FBgn0260634	eIF4G2	_5	0	0	0	0	0	0	1.92445	0.254428	0.254428	0	0	0
FBgn0260648	Rrp40	_5	0.975931	0.277707	0.277707	0.630334	1.29103	0.630334	1.43479	0	0	0.0454484	0	0
FBgn0260655	l(3)76BDm	_5	0	0.108244	0	0.179413	0.384432	0.179413	1.67883	0.6313	0.6313	0	0	0
FBgn0260743	GC1	_5	0	0	0	0	2.20347	0	1.84494	1.43131	1.43131	0.18332	0.465094	0.18332
FBgn0260934	par-1	_5	0.0605335	0.121938	0.0605335	0.424595	0.365231	0.365231	2.2633	2.17408	2.17408	2.65419	2.45778	2.45778
FBgn0260964	Vmat	_5	0.0350642	0	0	0	0	0	2.07995	0.623602	0.623602	0.679614	0.0546994	0.0546994
FBgn0260972	alc	_5	0.0171445	0.0011351	0.0011351	0.618949	0	0	0.816043	1.33681	0.816043	0	0.625219	0
FBgn0261238	Alh	_5	0	0	0	0	0.167854	0	0.845311	0	0	0	0	0
FBgn0261262	CG42613	_5	0	0	0	0	0	0	1.96284	0.424966	0.424966	0	0	0
FBgn0261270	SelD	_5	0.294497	0	0	0.505008	1.38181	0.505008	0.673783	0.703723	0.673783	0	0	0
FBgn0261276	Opa1	_5	0	0	0	0	0	0	1.40304	0.0714602	0.0714602	0.0399777	0.337545	0.0399777
FBgn0261285	Ppcs	_5	0	0.556984	0	0.0904909	0.128586	0.0904909	0.915797	2.20778	0.915797	0	0	0
FBgn0261387	CG17528	_5	0.0635905	0	0	0.353693	0	0	0.816783	0	0	0.313474	0	0
FBgn0261403	sxc	_5	0.24433	0	0	0.208919	0	0	2.35933	2.17663	2.17663	0	0	0
FBgn0261444	CG3638	_5	0.397103	0.0654978	0.0654978	0	0	0	2.00008	1.316	1.316	0	0	0
FBgn0261547	Exn	_5	0	0	0	0	0	0	1.23776	0.686888	0.686888	0	0	0
FBgn0261549	rdgA	_5	0	0	0	0	0	0	0.109992	2.10491	0.109992	0	0	0
FBgn0261554	CG42672	_5	0	0	0	0.12929	0	0	1.13911	0	0	0	0.111972	0
FBgn0261674	CG42709	_5	1.18714	0	0	0	0	0	1.67316	0.806994	0.806994	0	0	0
FBgn0261710	nocte	_5	0	0.853507	0	0	0	0	1.03418	0.588104	0.588104	0	0	0
FBgn0261789	SmD2	_5	0.677756	0.019817	0.019817	0.611616	0.163585	0.163585	2.45657	2.32606	2.32606	0	1.57819	0
FBgn0261790	SmE	_5	0.340828	0.300298	0.300298	0.909268	0.297804	0.297804	4.04332	0.990926	0.990926	0	0.140483	0
FBgn0261791	SNRPG	_5	0.843373	0.154775	0.154775	0.714467	0.246154	0.246154	1.58467	2.31524	1.58467	0.533747	0	0
FBgn0261794	kcc	_5	0.237825	0.424017	0.237825	0	0.0541223	0	1.87203	1.40217	1.40217	0.314461	0.608262	0.314461
FBgn0261800	LanB1	_5	0	0	0	0	1.93481	0	2.07496	0	0	0.521146	0	0
FBgn0261802	CG42748	_5	0	0.206271	0	0.228934	0	0	1.1097	2.39469	1.1097	0	0.301015	0
FBgn0261854	aPKC	_5	0	0.3633	0	0.258311	0.310568	0.258311	1.75039	1.62162	1.62162	0.0873119	0	0
FBgn0261862	whd	_5	0.284126	1.63488	0.284126	0.0741951	0.770599	0.0741951	2.76513	0	0	0	0.132332	0
FBgn0261933	SmD1	_5	0.337651	0.0374409	0.0374409	2.66255	0.442857	0.442857	3.83412	2.16017	2.16017	1.6422	0	0
FBgn0262511	Vha44	_5	0	1.17449	0	0	0.222763	0	0.0335	1.82399	0.0335	0	0.0655429	0
FBgn0262562	CG43102	_5	0	0	0	0	0	0	3.18483	0.816626	0.816626	0	0	0
FBgn0262601	SmB	_5	0.395477	0.731393	0.395477	0.66823	0.133642	0.133642	2.6532	2.32346	2.32346	0	0	0
FBgn0262614	pyd	_5	1.34403	0.542832	0.542832	0	0	0	1.8038	0.927822	0.927822	0	0.0638158	0
FBgn0262737	mub	_5	0.960816	0.993452	0.960816	1.05004	0.215955	0.215955	2.99744	1.33885	1.33885	0.000543247	0	0
FBgn0262738	norpA	_5	0	0.416736	0	0.546502	0.113264	0.113264	0	2.73736	0	0.165387	0	0
FBgn0262739	AGO1	_5	0.248352	0.945271	0.248352	0.678431	0.368133	0.368133	1.57918	4.01171	1.57918	0	0.397001	0
FBgn0262740	Evi5	_5	0	0	0	0	0.876885	0	1.33439	0.531902	0.531902	0	0	0
FBgn0262955	RpII140	_5	0.904733	0.132801	0.132801	0.747817	0.162569	0.162569	1.15392	2.00734	1.15392	0	0	0
FBgn0263006	SERCA	_5	0	0.426542	0	0.0675118	0.372805	0.0675118	0	4.26845	0	0	0.941606	0
FBgn0263197	Patronin	_5	0	0.800591	0	0	0	0	1.65476	0	0	0	0	0
FBgn0263198	Acn	_5	0.156668	0.732662	0.156668	0	0.558106	0	1.757	0.487466	0.487466	1.44648	0.069446	0.069446
FBgn0263220	Hk	_5	0	0	0	0	0	0	1.27292	0.944991	0.944991	0.412344	0	0
FBgn0263251	vnc	_5	0.641027	0.966465	0.641027	0.702086	1.18841	0.702086	1.6361	0.52799	0.52799	0	0	0
FBgn0263346	CG43427	_5	0	0	0	0.131028	0	0	0.78209	0	0	0	0.925391	0
FBgn0263391	hts	_5	0.779122	0.610415	0.610415	0.174344	0.698342	0.174344	1.74648	0.265403	0.265403	0.0726901	0.547919	0.0726901
FBgn0263396	sqd	_5	0.345052	0.420741	0.345052	1.17734	0.256285	0.256285	3.09014	3.25837	3.09014	0.0826626	0.197866	0.0826626
FBgn0263398	CG6364	_5	0	0	0	0	0	0	0.646695	3.51597	0.646695	1.5548	0.872537	0.872537
FBgn0263456	nwk	_5	0	0	0	0.317114	0	0	1.05899	2.21836	1.05899	0	0.130133	0
FBgn0263599	l(3)72Ab	_5	0.536289	0.751653	0.536289	1.6549	0.238734	0.238734	1.48275	0.986605	0.986605	0	0	0
FBgn0263980	CG43729	_5	0	0	0	0	0	0	0.906603	0	0	0	0.450254	0
FBgn0263993	CG43736	_5	0	0	0	0	0	0	2.34412	0	0	0	0	0
FBgn0264357	SNF4Agamma	_5	0.778083	0	0	0.703644	0	0	1.61302	0.177783	0.177783	0.823619	0.691734	0.691734
FBgn0264606	Fife	_5	0	0	0	0	0	0	1.21611	0.828328	0.828328	0	0	0
FBgn0264607	CaMKII	_5	0	0.0545634	0	0	0.339716	0	1.7122	3.36232	1.7122	0.635256	1.03623	0.635256
FBgn0264707	RhoGEF3	_5	0	0.00918569	0	0	0.865651	0	2.40151	0.435685	0.435685	0	0	0
FBgn0264855	AP-2alpha	_5	1.11631	1.02906	1.02906	0	0.864094	0	2.79661	0.703341	0.703341	0.46573	0.794553	0.46573
FBgn0264894	CG44085	_5	0.157057	0.249143	0.157057	0	0.101174	0	1.54459	0	0	1.15104	0.482152	0.482152
FBgn0264962	Pcf11	_5	0.326925	0	0	0.531829	0.17536	0.17536	1.18306	0.832454	0.832454	0	0	0
FBgn0264975	Nrg	_5	0	0	0	0.44055	1.40435	0.44055	1.73817	2.28726	1.73817	0	0.617449	0
FBgn0265082	Cdep	_5	0.333611	0	0	0	0.137705	0	1.81633	0.712488	0.712488	0.00837596	0	0
FBgn0265101	Sgt1	_5	0	0	0	0	0	0	0.778178	0	0	0	0	0
FBgn0265276	l(3)neo38	_5	0	0	0	0	0	0	0.755269	1.90884	0.755269	0	0	0
FBgn0265298	SC35	_5	0.375751	0.0995535	0.0995535	2.37226	0.253649	0.253649	2.07278	1.35182	1.35182	0	0	0
FBgn0265574	Cdc5	_5	0.272263	0.803164	0.272263	0.355101	0.401034	0.355101	1.21534	0.0102308	0.0102308	0	0	0
FBgn0265597	rad	_5	0	0	0	0	0	0	1.2187	0.135199	0.135199	0	0	0
FBgn0265959	rdgC	_5	0.210647	0	0	0	0.327572	0	0.918285	0.0619131	0.0619131	0.0544945	0.418306	0.0544945
FBgn0266186	Vamp7	_5	0.783851	1.32404	0.783851	0.571002	0.153185	0.153185	1.22486	0.926767	0.926767	0.062113	0.175055	0.062113
FBgn0266557	kis	_5	0.706475	0.792353	0.706475	0	0	0	2.87071	1.36142	1.36142	0	0	0
FBgn0266579	tau	_5	0	0	0	0.838638	0	0	2.75178	1.98501	1.98501	2.80157	1.8541	1.8541
FBgn0266668	Exo84	_5	0	0	0	0	0	0	0.855658	0	0	0	0	0
FBgn0266756	btsz	_5	0.203524	0	0	0	0	0	1.33676	1.2702	1.2702	0.3308	0	0
FBgn0266917	Sf3a1	_5	1.35472	0	0	1.36629	0.672059	0.672059	2.57297	2.24334	2.24334	0	0	0
FBgn0267350	PI4KIIIalpha	_5	1.22225	0.16742	0.16742	0.270625	0.777302	0.270625	0.936177	1.881	0.936177	0.365186	0	0
FBgn0267790	rump	_5	0.321772	0	0	0.525366	0.157233	0.157233	1.14312	0.803277	0.803277	0	0	0
FBgn0267791	HnRNP-K	_5	0.344806	0	0	0.545545	0.181096	0.181096	1.18786	0.842802	0.842802	0	0	0
FBgn0267849	Syx7	_5	0.224219	0.403416	0.224219	0.601226	0.511629	0.511629	1.34183	0.461225	0.461225	0.576222	0.0912746	0.0912746
FBgn0283469	Vps4	_5	0	0	0	0.529195	0.0307435	0.0307435	0.621097	0.642889	0.621097	0	0	0
FBgn0283658	muc	_5	0.0530859	0.606472	0.0530859	0.0598611	1.15666	0.0598611	0.774323	1.01913	0.774323	0.400149	0.700666	0.400149
FBgn0285926	Imp	_5	0.422643	0	0	0	0.135715	0	1.06187	1.10694	1.06187	0	0	0
FBgn0000032	Acph-1	_7	1.84567	0.601449	0.601449	0	0	0	0	0	0	0	0	0
FBgn0000078	Amy-d	_7	3.16185	1.63535	1.63535	0	0	0	0	0	0	0.901091	0	0
FBgn0000257	car	_7	2.82404	0.326328	0.326328	0.133797	0	0	1.03437	0	0	0	0	0
FBgn0000286	Cf2	_7	2.36241	0	0	0	0	0	1.32044	0.602588	0.602588	0	0	0
FBgn0000326	clt	_7	1.2083	0	0	1.23774	0.0748222	0.0748222	0	0	0	0	0	0
FBgn0001090	bnb	_7	1.98552	0	0	0	0	0	0.690004	0.233981	0.233981	1.596	0.112282	0.112282
FBgn0001112	Gld	_7	2.37129	0	0	0	0	0	0	0	0	0.19733	0.44348	0.19733
FBgn0001215	Hrb98DE	_7	4.24541	1.3926	1.3926	0.982436	0.525565	0.525565	2.60075	2.86137	2.60075	0.162837	0	0
FBgn0001977	CIAPIN1	_7	1.05436	0	0	0.0126943	0	0	0	0.102582	0	0	0	0
FBgn0002306	sas	_7	1.59862	0	0	0	0	0	0	0	0	0	0	0
FBgn0002552	lin	_7	1.69015	0	0	0	0	0	0	0	0	0	0	0
FBgn0002773	Mlc2	_7	2.21869	0	0	1.18759	1.75049	1.18759	3.03268	0	0	0	0.780799	0
FBgn0002783	mor	_7	2.01229	0	0	0	0	0	0	0.147453	0	0.556366	0	0
FBgn0002789	Mp20	_7	2.33937	0	0	1.27695	1.59186	1.27695	0.498908	0.572644	0.498908	0.56685	0.27486	0.27486
FBgn0003093	Pkc98E	_7	2.97483	0.151433	0.151433	0	0	0	2.64894	2.93864	2.64894	0	0	0
FBgn0003231	ref(2)P	_7	1.86587	2.08754	1.86587	0	0.282159	0	0	0	0	0.115257	0.101092	0.101092
FBgn0003277	RpII215	_7	1.68357	0.193079	0.193079	1.09748	0.165043	0.165043	1.6359	0.728744	0.728744	0	0	0
FBgn0003392	shi	_7	2.67508	0	0	0	0	0	1.78193	0	0	0	0.0905127	0
FBgn0004034	y	_7	1.48922	0.0253374	0.0253374	0	0	0	0	0	0	0	0	0
FBgn0004629	Cys	_7	3.87572	0	0	0.0956795	0	0	1.61659	0.430006	0.430006	0	0	0
FBgn0004797	mdy	_7	0.886191	0	0	0	0	0	2.50148	0	0	0	0	0
FBgn0004856	Bx42	_7	1.34695	0	0	0	1.18325	0	2.25336	0.0954921	0.0954921	0	0	0
FBgn0004895	FoxL1	_7	3.91432	0.986208	0.986208	0	0.165561	0	0	0	0	0	0.295615	0
FBgn0010435	emp	_7	1.40924	2.5195	1.40924	1.26161	1.52856	1.26161	0.172456	0.0526354	0.0526354	0.441196	0	0
FBgn0010770	ppan	_7	2.23063	0.509319	0.509319	1.37646	0.655738	0.655738	0	0	0	0	0	0
FBgn0011509	SrpRbeta	_7	0.973947	1.39758	0.973947	1.70563	0.822179	0.822179	0.175092	0	0	0.792307	0.0533312	0.0533312
FBgn0011571	caz	_7	1.47549	0	0	0.63598	0	0	0	0.0860466	0	0	0	0
FBgn0011706	rpr	_7	1.31133	0.209181	0.209181	0	0	0	0	0	0	0	0	0
FBgn0013269	FK506-bp1	_7	2.12253	0	0	0.893526	0.856079	0.856079	0.317606	0.828207	0.317606	0.382801	0	0
FBgn0013272	Gp150	_7	1.55367	0	0	0	0.457755	0	0	0	0	0	0	0
FBgn0014031	Spat	_7	0.854736	1.31307	0.854736	0.686752	0.537223	0.537223	0.307774	0.845062	0.307774	0.809628	0.248185	0.248185
FBgn0014903	CG14630	_7	1.72667	1.20784	1.20784	0	1.17844	0	0	0	0	0	0	0
FBgn0015298	Srp19	_7	1.2309	0	0	0	0	0	0	0.104578	0	0	0	0
FBgn0015527	peng	_7	2.90316	0	0	0.789248	0.357565	0.357565	0	0	0	0	0	0
FBgn0015541	CG46339	_7	1.76469	0	0	0	0	0	0	0	0	0	0	0
FBgn0015544	spag	_7	1.92183	0.229337	0.229337	0.445275	0.0278643	0.0278643	0	0	0	0.0195303	0.15196	0.0195303
FBgn0015791	Rab14	_7	1.78032	0.352157	0.352157	0.451684	0	0	0.265498	0.41525	0.265498	0	0	0
FBgn0015805	HDAC1	_7	1.66912	0	0	0.317002	0	0	0.393818	0	0	0	0	0
FBgn0016075	vkg	_7	1.75566	1.37788	1.37788	0.88141	2.41975	0.88141	0	0.635736	0	1.25581	0.211728	0.211728
FBgn0016700	Rab1	_7	3.64454	0.0833942	0.0833942	0.0553046	2.0964	0.0553046	0.30011	0.297625	0.297625	0.921173	0.178194	0.178194
FBgn0017429	CG5989	_7	1.72719	0	0	0	0	0	0	0.193774	0	0	0.26215	0
FBgn0019830	colt	_7	2.2291	0	0	0.542695	0.0416108	0.0416108	1.42259	0.604282	0.604282	0	0.686427	0
FBgn0019925	Surf4	_7	1.11126	1.00504	1.00504	1.18348	0.214795	0.214795	0	0.120879	0	0	0	0
FBgn0020496	CtBP	_7	2.45199	0.482619	0.482619	0	0.0527821	0	0.0737468	0	0	0.713362	0	0
FBgn0020506	Amyrel	_7	1.95218	0.615672	0.615672	0	0	0	0	0	0	0.762508	0	0
FBgn0020655	ArfGAP1	_7	1.16662	1.21365	1.16662	1.3418	1.66851	1.3418	1.34819	0.598869	0.598869	0	0.496548	0
FBgn0020908	Scp1	_7	1.03541	0.727893	0.727893	0.390068	0	0	3.10151	0	0	0.180893	0.117382	0.117382
FBgn0021995	Rs1	_7	2.22927	0.340402	0.340402	1.38227	0.393734	0.393734	0	0	0	0	0	0
FBgn0022069	Nnp-1	_7	4.1787	0.853735	0.853735	3.37886	0.438301	0.438301	0.106654	0	0	0	0	0
FBgn0022774	Oat	_7	2.15908	0.472952	0.472952	0.326429	0.413151	0.326429	3.32943	0.338764	0.338764	0.435643	0.419905	0.419905
FBgn0022985	qkr58E-2	_7	2.90298	0.0653103	0.0653103	0	0	0	1.74199	0.903664	0.903664	0	0	0
FBgn0023521	CG3587	_7	1.55305	1.2088	1.2088	0.718693	0.246073	0.246073	0.37988	0.718529	0.37988	0	0	0
FBgn0023527	CG3071	_7	0.970397	0.285837	0.285837	0.905357	0	0	0	0	0	0	0	0
FBgn0023535	arg	_7	2.42103	0	0	0.123158	0	0	1.567	0	0	0.193603	0	0
FBgn0024556	mEFTu1	_7	2.24377	0.643362	0.643362	0.183168	0.84136	0.183168	1.0677	0.204319	0.204319	0.0654132	0.610357	0.0654132
FBgn0024733	RpL10	_7	2.85408	0	0	0.289745	0.418988	0.289745	0.957509	0.425428	0.425428	0.203055	1.52471	0.203055
FBgn0025366	Ip259	_7	1.4947	0	0	2.49986	0.0716615	0.0716615	0.303051	0	0	0	0	0
FBgn0025456	CREG	_7	2.4188	0.0510222	0.0510222	0	0.229352	0	1.60949	0.950698	0.950698	0.975097	0.191848	0.191848
FBgn0025687	LKRSDH	_7	6.16022	0.609129	0.609129	0	1.11342	0	0	0.597153	0	0	0	0
FBgn0025879	Timp	_7	1.14462	0.0261094	0.0261094	0	0	0	0.0974643	0	0	0.10613	0	0
FBgn0026196	nop5	_7	0.972266	1.8599	0.972266	1.00858	0.175292	0.175292	0	0.0379808	0	0	0	0
FBgn0026634	ldlCp	_7	1.53922	1.32565	1.32565	0.128743	0.13534	0.128743	0	0	0	0	0	0
FBgn0026721	fat-spondin	_7	2.97891	0	0	0	0	0	0	0	0	0	0	0
FBgn0027080	TyrRS	_7	1.89169	0.389736	0.389736	0.616222	0.203173	0.203173	1.03871	0.912355	0.912355	0.529085	0.0124982	0.0124982
FBgn0027095	Manf	_7	3.02525	0.689328	0.689328	0	0	0	0.609878	0.30443	0.30443	0.963209	0.137697	0.137697
FBgn0027279	l(1)G0196	_7	1.34435	0	0	0	0	0	0	0.146239	0	0	0	0
FBgn0027378	MRG15	_7	1.34033	0.201747	0.201747	0.23885	0	0	0	0	0	0	0	0
FBgn0027598	cindr	_7	1.8864	0.421872	0.421872	0.639992	0.234276	0.234276	2.42247	0.292088	0.292088	0	0	0
FBgn0027836	Dgp-1	_7	1.72019	0	0	0	0	0	0	0	0	0	0	0
FBgn0028379	fan	_7	1.12699	0	0	0	0	0	0	0.283369	0	0	0	0
FBgn0028473	Non1	_7	2.6848	0.986487	0.986487	1.42744	0.443506	0.443506	0	0	0	0	0	0
FBgn0028670	Vha100-2	_7	1.59701	1.8817	1.59701	0.310882	1.68428	0.310882	0.997685	0.789396	0.789396	0.321562	1.03174	0.321562
FBgn0028671	Vha100-1	_7	1.77209	1.1857	1.1857	0.604181	0.847948	0.604181	1.09239	1.1293	1.09239	0	0.623737	0
FBgn0028697	RpL15	_7	2.72931	0.129838	0.129838	0	0.715414	0	0.475321	0.619431	0.475321	0	0	0
FBgn0028744	CG5033	_7	3.12679	0.272512	0.272512	1.69515	1.26235	1.26235	0	0	0	0	0	0
FBgn0029095	aru	_7	1.10471	0	0	0	0	0	0.125523	0	0	0.264808	0	0
FBgn0029687	Vap33	_7	3.45594	0	0	0.436363	0	0	0.788077	1.45768	0.788077	0.191548	0	0
FBgn0029821	CG4020	_7	2.59046	1.11629	1.11629	0	0	0	0	0	0	0	0	0
FBgn0029897	RpL17	_7	3.86653	0.737677	0.737677	1.01471	0.639283	0.639283	0.670383	1.26721	0.670383	0.724446	0.981846	0.724446
FBgn0029929	CG4593	_7	2.30655	0	0	0.544326	0.199522	0.199522	0	0	0	0	0	0
FBgn0029942	CG2059	_7	2.07068	0	0	1.18348	0.285098	0.285098	2.74035	0.584382	0.584382	1.31728	1.32068	1.31728
FBgn0030000	CG2260	_7	1.22376	0.274851	0.274851	0.64808	0	0	0	0	0	0	0	0
FBgn0030218	CG1628	_7	3.96057	0	0	0	0	0	3.2707	0	0	0.499274	0	0
FBgn0030272	CG15201	_7	1.91704	1.2431	1.2431	0	0	0	0.155626	0	0	0.528783	0	0
FBgn0030343	ATP7	_7	2.48425	0.192089	0.192089	0.360287	0.0958888	0.0958888	0	0	0	0	0	0
FBgn0030630	CG12608	_7	2.49377	0.505152	0.505152	0.91512	0.341047	0.341047	0	0	0	0	0	0
FBgn0030720	CG8939	_7	2.75899	0	0	0.107085	0.111017	0.107085	0	0	0	0	0	0
FBgn0030786	mRpL22	_7	1.32589	0.00099227	0.00099227	0.0370697	0.45062	0.0370697	0	0	0	0	0	0
FBgn0030855	CG5800	_7	1.49685	0.0593324	0.0593324	0.896764	0.091738	0.091738	0	0	0	0	0	0
FBgn0030955	CG6891	_7	1.1286	0	0	0	0	0	0	0.158741	0	0	0	0
FBgn0031149	Stt3A	_7	1.75554	1.24533	1.24533	1.96623	1.10998	1.10998	0.407142	0	0	1.08707	0.33072	0.33072
FBgn0031194	CG17598	_7	1.34546	0	0	0.606862	0	0	0.442169	0	0	0	0	0
FBgn0031604	Elp3	_7	2.08975	0.734669	0.734669	0.685924	0.759762	0.685924	1.65766	0.964297	0.964297	0.0727373	0	0
FBgn0031701	TotM	_7	1.40654	0.138529	0.138529	0	0	0	0	0	0	0	0	0
FBgn0031724	CG18266	_7	1.0999	0	0	0	0	0	0	0	0	0	0	0
FBgn0031799	Pez	_7	1.08032	0	0	0	0	0	0	0	0	0	0	0
FBgn0031850	Tsp	_7	1.49376	0	0	0	0	0	0	0	0	0.106372	0.553333	0.106372
FBgn0031877	CG10399	_7	1.53681	1.37824	1.37824	0.685953	1.56984	0.685953	0.12715	0	0	0.611902	0.100505	0.100505
FBgn0032001	CG8360	_7	2.6429	1.1979	1.1979	0.044471	0.703961	0.044471	0.00620738	0.64478	0.00620738	0	0	0
FBgn0032015	Ostgamma	_7	4.82198	0.390601	0.390601	0.928101	2.74817	0.928101	0	0	0	0.695222	0	0
FBgn0032020	strat	_7	4.72932	0	0	1.85439	0.724049	0.724049	2.98978	1.49906	1.49906	0.159846	0.32197	0.159846
FBgn0032029	CG17292	_7	1.67513	0.340695	0.340695	0	0	0	0	0	0	0	0	0
FBgn0032050	CG13096	_7	2.41885	0	0	0	0	0	0	0	0	0	0	0
FBgn0032138	CG4364	_7	3.23844	0.834151	0.834151	1.61787	0.396578	0.396578	0	0	0	0	0	0
FBgn0032229	CG5045	_7	1.59811	0	0	0.429617	0.082007	0.082007	0	0	0	0.0182537	0.667331	0.0182537
FBgn0032298	CG6724	_7	2.81049	0.207145	0.207145	1.7441	0.549863	0.549863	0	0	0	0	0	0
FBgn0032388	CG6686	_7	1.7435	0.964402	0.964402	0	0	0	3.28755	0.621663	0.621663	0	0	0
FBgn0032408	CG6712	_7	3.22772	0.145257	0.145257	1.34636	0.113405	0.113405	0.647452	0	0	0	0	0
FBgn0032455	Pih1D1	_7	1.49382	0	0	0	0	0	2.67237	0	0	0	0	0
FBgn0032515	loqs	_7	2.01335	0	0	0	0	0	0.11807	0.0741649	0.0741649	0	0	0
FBgn0032725	Nedd8	_7	0.985973	0.796824	0.796824	0.880045	0.308771	0.308771	0.500316	0.644361	0.500316	0.598099	0	0
FBgn0032919	CG9253	_7	1.54969	0	0	0	0	0	0	0	0	0	0	0
FBgn0032925	CG9246	_7	3.08404	0.632036	0.632036	1.61454	2.29911	1.61454	0	0	0	0	0	0
FBgn0032955	CG2201	_7	1.14238	0	0	0	0	0	0	0	0	0	0	0
FBgn0033113	Spn42Dc	_7	2.19387	0	0	0.0867323	0.740819	0.0867323	0.127826	0	0	0	0	0
FBgn0033378	tsu	_7	2.96515	0	0	1.16719	0.591688	0.591688	1.18278	1.13452	1.13452	0	0	0
FBgn0033465	Etf-QO	_7	1.52863	1.19226	1.19226	0.740998	1.42552	0.740998	1.74592	1.13984	1.13984	0.44243	0.071841	0.071841
FBgn0033485	RpLP0-like	_7	4.54839	0.101783	0.101783	2.4144	0.168499	0.168499	0.32285	0.0988535	0.0988535	0	0	0
FBgn0033540	Elp2	_7	3.64646	0.721272	0.721272	0.804308	0.349791	0.349791	0.651611	0.423453	0.423453	0	0	0
FBgn0033614	Obp47b	_7	1.31021	0	0	0	0	0	0	0	0	0	0	0
FBgn0033653	CG13192	_7	1.20738	0	0	0	0	0	0	0	0	0	0	0
FBgn0033691	CG8860	_7	1.43879	1.19758	1.19758	2.11199	1.02344	1.02344	0.178069	0	0	1.08139	0.248093	0.248093
FBgn0033701	CG13171	_7	1.15865	0	0	0	0	0	0	0	0	0	0	0
FBgn0033741	CG8545	_7	3.00946	0.880985	0.880985	1.52153	1.6492	1.52153	0	0	0	0	0	0
FBgn0033761	CG8778	_7	0.831524	1.98251	0.831524	1.77579	1.02307	1.02307	0.0430905	0.219028	0.0430905	0.87847	0.172862	0.172862
FBgn0033769	CG8768	_7	2.76489	0	0	0	0	0	0.157783	0	0	0.355489	0.7083	0.355489
FBgn0034073	CG8414	_7	1.47396	0	0	0	0	0	0	0	0	0	0	0
FBgn0034243	Ns2	_7	1.69787	0.000608159	0.000608159	1.32209	0.86914	0.86914	0	0	0	0	0	0
FBgn0034417	CG15117	_7	2.19436	0.645425	0.645425	1.14119	1.30514	1.14119	0.22083	1.16822	0.22083	0.0812347	0	0
FBgn0034437	CG10051	_7	1.12178	0	0	0	0	0	0	0	0	0	0	0
FBgn0034496	CG9143	_7	2.60908	0	0	1.96918	0.553866	0.553866	0	0	0	0	0	0
FBgn0034504	CG8929	_7	2.18608	0	0	0.351595	0	0	0.538485	0	0	0	0.0229594	0
FBgn0034509	Obp57c	_7	2.53696	2.53545	2.53545	0	0	0	0	0	0	2.23931	0	0
FBgn0034724	babos	_7	2.54455	2.18626	2.18626	0.295221	0	0	0	0.000436756	0	1.02399	0	0
FBgn0034876	wmd	_7	2.72622	0	0	0.12246	0.0582647	0.0582647	0	0	0	0	0	0
FBgn0034879	Rrp4	_7	3.18641	1.2267	1.2267	0.36029	2.29944	0.36029	0.2448	0	0	0.0207303	0	0
FBgn0034919	CG5569	_7	2.34379	0	0	2.10469	0	0	0.1088	0	0	0.391161	0	0
FBgn0034951	CG3860	_7	0.921595	1.11186	0.921595	0.665379	0	0	0	0	0	0	0	0
FBgn0034982	Naa35	_7	1.77496	0	0	0	0	0	0	0	0	0	0	0
FBgn0035087	CG2765	_7	0.948197	0.577627	0.577627	1.00709	0	0	0	0	0	0.0336034	0	0
FBgn0035091	CG3829	_7	1.86693	0.179415	0.179415	0	0	0	0	0	0	0	0	0
FBgn0035524	CG11583	_7	2.99735	1.26625	1.26625	1.45983	0.445602	0.445602	0	0	0	0	0	0
FBgn0035528	CG15012	_7	1.28665	1.45245	1.28665	0	0	0	0	0	0	0	0	0
FBgn0035542	DOR	_7	1.7281	0	0	0	0	0	0	0.052648	0	0	0.314278	0
FBgn0035807	CG7492	_7	1.93386	0	0	0	0	0	0	0	0	0	0	0
FBgn0035878	CG7182	_7	1.71862	0	0	1.65417	0.171861	0.171861	0	0.129858	0	0	0	0
FBgn0035911	CG6638	_7	1.75293	1.77941	1.75293	0.66845	1.73331	0.66845	0	0.0910994	0	1.25101	0.535725	0.535725
FBgn0036118	Blos2	_7	1.1453	0	0	0	0	0	0	0	0	0.265272	0	0
FBgn0036124	CG7839	_7	2.61672	0.158229	0.158229	0.920224	1.10634	0.920224	0	0	0	0	0	0
FBgn0036187	RIOK1	_7	1.89851	0	0	0	0	0	0	0	0	0	0	0
FBgn0036237	viaf	_7	1.28696	0.871298	0.871298	1.06298	0.643145	0.643145	0.640038	0.289814	0.289814	0.541754	0.0813746	0.0813746
FBgn0036258	eIF3l	_7	2.29734	0.57754	0.57754	0.25775	0.278714	0.25775	0.875799	0.400568	0.400568	0.142218	0.385317	0.142218
FBgn0036740	Vps60	_7	2.06869	0	0	0.243574	0.633076	0.243574	0.777759	0.501612	0.501612	0.159185	0.399169	0.159185
FBgn0036749	CG7460	_7	1.65344	0	0	0	0.339048	0	0	0	0	0	0	0
FBgn0036752	Adgf-A	_7	3.3125	1.66303	1.66303	0	0	0	0	0	0	0	0	0
FBgn0036754	CG5589	_7	2.73935	0	0	0.846422	0.395385	0.395385	0	0	0	0	0	0
FBgn0036838	CG3808	_7	1.03745	0	0	0	0	0	0	0	0	0	0	0
FBgn0037094	CG7611	_7	1.07369	1.22137	1.07369	0.357342	1.41914	0.357342	0	0	0	0	0	0
FBgn0037102	CRIF	_7	2.43989	1.70168	1.70168	0.640376	0.229364	0.229364	0	0	0	0.0358081	0	0
FBgn0037182	ArfGAP3	_7	1.36929	1.63914	1.36929	0.596115	1.78427	0.596115	1.83957	1.06592	1.06592	0.641546	2.10887	0.641546
FBgn0037248	srl	_7	1.57302	0	0	0	0	0	0	0	0	0	0	0
FBgn0037261	CG9775	_7	2.29214	0.0948313	0.0948313	0.112905	0	0	2.31432	2.1724	2.1724	1.08799	0	0
FBgn0037298	CG2604	_7	2.10634	0.286056	0.286056	1.99232	0.430184	0.430184	2.61152	1.10039	1.10039	0.620231	1.24105	0.620231
FBgn0037376	Hat1	_7	1.73518	2.19624	1.73518	0	0	0	0	0	0	0	0	0
FBgn0037489	CG1234	_7	2.60138	0.121435	0.121435	2.01385	1.30869	1.30869	0	0	0	0	0	0
FBgn0037491	CG1227	_7	2.02169	0.710276	0.710276	1.05086	0	0	0	0	0	0	0	0
FBgn0037536	CG2698	_7	3.37199	0	0	0	0	0	0	0	0	0	0	0
FBgn0037537	CG2767	_7	1.68637	0	0	0	0	0	0.0963269	0.0067763	0.0067763	0	0	0
FBgn0037552	CG7800	_7	3.89771	0.342606	0.342606	0	0	0	0	0	0	0	0	0
FBgn0037899	RpL24-like	_7	1.76956	0.0818639	0.0818639	1.37998	0	0	0	0	0	0	0	0
FBgn0037926	Elp1	_7	2.36694	0.26054	0.26054	0.53258	0.713956	0.53258	1.42664	0.343994	0.343994	0	0	0
FBgn0038046	CG5641	_7	1.11638	0.0258471	0.0258471	0.175096	0.305758	0.175096	1.75286	0.0997579	0.0997579	0	0	0
FBgn0038271	UQCR-C1	_7	3.03834	0	0	0.564178	0.886855	0.564178	1.86114	2.47067	1.86114	1.11152	0.0919264	0.0919264
FBgn0038387	blp	_7	3.59708	0.673404	0.673404	0.288091	1.37644	0.288091	2.60753	1.48635	1.48635	0.59469	0.395551	0.395551
FBgn0038405	CG8927	_7	1.93206	0	0	0	0	0	1.29615	0	0	0	0	0
FBgn0038585	Non3	_7	4.27818	1.16708	1.16708	1.11639	0.784532	0.784532	0	0	0	0.477001	0	0
FBgn0038721	subdued	_7	0.988454	0	0	0	0	0	0.118146	0	0	0	0	0
FBgn0038771	CG4390	_7	1.06754	1.71621	1.06754	1.01407	0.814747	0.814747	0	0.794947	0	0.946283	0	0
FBgn0038903	RpI12	_7	2.99203	0	0	0	0.639166	0	0	0	0	0	0	0
FBgn0039111	PTPMT1	_7	1.81523	0	0	1.56385	0	0	0	0	0	0	0.420237	0
FBgn0039182	CG5728	_7	2.72549	0.279397	0.279397	1.04243	1.5784	1.04243	0	0	0	0	0	0
FBgn0039233	CG7006	_7	3.07902	0.928448	0.928448	1.16472	0.376163	0.376163	0	0	0	0	0	0
FBgn0039358	CG5028	_7	3.00278	0.547948	0.547948	0.677925	1.49857	0.677925	2.09666	1.19991	1.19991	1.28526	1.18874	1.18874
FBgn0039532	Mtl	_7	3.24883	0	0	0	0.110886	0	0.165201	1.36091	0.165201	0	0	0
FBgn0039562	Gp93	_7	2.51679	1.0762	1.0762	0.43367	0.597163	0.43367	0.249822	0.897787	0.249822	0.316639	1.04662	0.316639
FBgn0039685	Obp99b	_7	2.17762	0.0650494	0.0650494	0.515962	0	0	0.145801	0.878368	0.145801	0.850242	0.0760976	0.0760976
FBgn0039755	CG15531	_7	2.02534	1.56481	1.56481	0	0	0	0	0	0	0	0	0
FBgn0039828	CG1542	_7	1.95337	0.18322	0.18322	1.07576	0.293635	0.293635	0	0	0	0	0	0
FBgn0039875	sip3	_7	3.28625	0.120126	0.120126	2.41379	0.129922	0.129922	0.130665	0	0	0.173244	0.13683	0.13683
FBgn0039877	Mccc1	_7	1.65148	1.61012	1.61012	1.42395	1.71442	1.42395	0	0.387017	0	0.512717	0.420278	0.420278
FBgn0039929	CG11076	_7	1.28362	0	0	0	0	0	0	0	0	0	0	0
FBgn0040102	lectin-24Db	_7	2.75837	0.0899315	0.0899315	0	0	0	3.03164	0.00590771	0.00590771	0	0	0
FBgn0040383	CG5254	_7	0.853011	1.09774	0.853011	1.41609	0.490226	0.490226	0.679825	0.220516	0.220516	0.187631	0.392509	0.187631
FBgn0040475	SH3PX1	_7	2.10057	0.406211	0.406211	0.145056	0	0	0.0715773	0	0	0	0	0
FBgn0040512	zetaCOP	_7	1.44315	1.43733	1.43733	1.19208	1.99545	1.19208	0.544147	1.04384	0.544147	0.0622337	0.359383	0.0622337
FBgn0040534	Sf3b5	_7	2.39825	0	0	0.71461	0.988825	0.71461	1.74015	0.97166	0.97166	0	0	0
FBgn0040623	Spase12	_7	1.31928	1.11972	1.11972	2.10287	1.25673	1.25673	0.198557	0	0	0.965849	0.256553	0.256553
FBgn0040918	schlank	_7	1.93737	0.384665	0.384665	2.16352	0.137637	0.137637	0.174272	0	0	0	0	0
FBgn0042094	Adk3	_7	3.22014	1.21953	1.21953	0.237978	0.371841	0.237978	0	1.3324	0	1.01426	0.534047	0.534047
FBgn0042712	HBS1	_7	2.29892	0	0	0.602699	0	0	0	0	0	0	0	0
FBgn0051092	LpR2	_7	2.32305	1.40042	1.40042	0	0	0	0.362176	0.216395	0.216395	0.172291	0.00183939	0.00183939
FBgn0051973	Cda5	_7	1.30795	0.0201116	0.0201116	0	0	0	0	0	0	0	0	0
FBgn0052075	CG32075	_7	0.996773	0	0	0	0	0	0	0	0	0	0	0
FBgn0052103	CG32103	_7	0.828595	0	0	0.249436	0	0	2.69855	0.108941	0.108941	0	0.115495	0
FBgn0052344	CG32344	_7	4.30777	0.187926	0.187926	1.17623	0.379397	0.379397	0	0	0	0	0	0
FBgn0052672	Atg8a	_7	2.15489	0	0	1.49344	0	0	0.85542	0.477556	0.477556	0	0.509024	0
FBgn0052694	CG32694	_7	1.18459	1.23226	1.18459	0	2.34876	0	0	1.06524	0	0	0	0
FBgn0052758	CG32758	_7	1.53065	0	0	0.591654	0	0	1.84088	0.0954698	0.0954698	0	0	0
FBgn0053126	NLaz	_7	2.98142	0.782701	0.782701	1.3779	1.38732	1.3779	1.31534	0.487109	0.487109	0.302377	0	0
FBgn0250753	kra	_7	1.91214	0	0	0.187741	0.173617	0.173617	0	0.111257	0	0	0.604701	0
FBgn0250838	roh	_7	1.99778	0	0	1.57248	1.09709	1.09709	0	0	0	0.275392	0	0
FBgn0259111	Ndae1	_7	1.75044	1.48513	1.48513	0.22481	1.05778	0.22481	0	0	0	0	0	0
FBgn0259937	Nop60B	_7	1.65834	1.02978	1.02978	1.86693	1.12872	1.12872	1.01279	0.56061	0.56061	0	0.868846	0
FBgn0260859	Bet3	_7	4.34214	0	0	0	0.746732	0	0	0	0	0	0	0
FBgn0260860	Bet5	_7	1.5444	0.159712	0.159712	0	0	0	0	0	0	0	0	0
FBgn0260861	Trs23	_7	1.43462	0.0619956	0.0619956	0.0423814	0	0	0	0	0	0	0	0
FBgn0260862	Vti1a	_7	2.04918	0	0	1.63055	1.19232	1.19232	0.620978	0.091039	0.091039	0	0	0
FBgn0261573	CoRest	_7	3.15028	0	0	0	0.398672	0	0.237699	0.823196	0.237699	0	0	0
FBgn0261722	fwe	_7	2.22286	0.0339137	0.0339137	1.60595	0	0	0	0	0	0	0	0
FBgn0261859	CG42788	_7	1.81496	1.33987	1.33987	0	0	0	0.0263405	0	0	0	0	0
FBgn0262114	RanBPM	_7	1.64908	0	0	0	0.482821	0	0	0	0	0.197674	0	0
FBgn0263355	CG31688	_7	1.22425	0	0	0	0.596724	0	0.278638	0	0	0	0	0
FBgn0263598	Vha68-2	_7	1.2904	1.9321	1.2904	0.756387	1.71546	0.756387	0.43259	1.24269	0.43259	0.244318	2.078	0.244318
FBgn0263603	Zn72D	_7	4.63779	0.785592	0.785592	0.293053	0	0	2.23047	1.9811	1.9811	0.700421	0.123001	0.123001
FBgn0263987	spoon	_7	3.33188	0.67084	0.67084	0	0	0	0	0	0	0	0	0
FBgn0264691	Lst8	_7	2.23534	0	0	0.156308	0	0	0	0.0950709	0	0	0	0
FBgn0265262	Vha68-1	_7	1.01168	1.20551	1.01168	0.496339	1.29998	0.496339	1.41595	1.93002	1.41595	0.10346	1.56068	0.10346
FBgn0265274	Inx3	_7	1.75771	0.343968	0.343968	0	0	0	1.73168	0.826755	0.826755	0.761668	0	0
FBgn0266581	pit	_7	3.2343	0.29654	0.29654	1.57973	0.589767	0.589767	0	0	0	0	0	0
FBgn0266723	Trs31	_7	2.32755	0	0	0	0	0	0	0	0	0	0	0
FBgn0266724	Trs20	_7	1.34993	0	0	0	0	0	0	0	0	0	0	0
FBgn0000150	awd	_2	0.910712	0.541599	0.541599	0.921303	0	0	0.141152	0.436591	0.141152	0.443413	0.0857343	0.0857343
FBgn0000181	bic	_2	1.17698	0.142614	0.142614	1.76326	2.25365	1.76326	0.249178	0.553131	0.249178	0	0.0926931	0
FBgn0000250	cact	_2	0.309795	0.630965	0.309795	0.870367	0.391315	0.391315	0	0	0	1.18817	0	0
FBgn0000447	Dhod	_2	0	0.0153841	0	3.668	0.413797	0.413797	0.831497	0.649827	0.649827	2.24395	0.489576	0.489576
FBgn0000578	ena	_2	0	0	0	2.77399	0.0272667	0.0272667	0.573954	2.98581	0.573954	0.250005	0	0
FBgn0001128	Gpdh1	_2	0.00475243	0.0323819	0.00475243	1.64179	0.262975	0.262975	1.14739	0.667017	0.667017	0.697229	0	0
FBgn0001187	Hex-C	_2	0	0	0	2.65107	1.10195	1.10195	1.16446	1.15023	1.15023	1.11914	0	0
FBgn0001250	if	_2	0.19982	0.39211	0.19982	1.31125	0.0403657	0.0403657	0.950534	0.219472	0.219472	0	0.777217	0
FBgn0001276	ix	_2	0	0	0	1.5308	0	0	0	0	0	0	0	0
FBgn0001291	Jra	_2	0	0	0	1.73045	0	0	0	0	0	0	0	0
FBgn0001491	l(1)10Bb	_2	1.57559	0.731339	0.731339	2.26687	0.557606	0.557606	0.444198	0	0	0	0	0
FBgn0002868	MtnA	_2	0	0	0	2.53109	0	0	0	0	0	0	0	0
FBgn0003067	Pepck	_2	0.818135	1.53589	0.818135	2.3461	0.708393	0.708393	0.791582	2.93301	0.791582	0.174971	0.935769	0.174971
FBgn0003076	Pgm	_2	1.16948	0.589756	0.589756	2.37408	1.61856	1.61856	1.32713	3.23916	1.32713	0.250059	0.432269	0.250059
FBgn0003189	r	_2	0	0.0634522	0	2.25342	0.155786	0.155786	0.014584	0.0880684	0.014584	0.350706	0	0
FBgn0003205	Ras85D	_2	0.109758	0	0	0.174084	0.829874	0.174084	0.378445	0.839843	0.378445	0.330655	0.381018	0.330655
FBgn0003206	Ras64B	_2	0	0.0896755	0	2.35474	0.0210528	0.0210528	0	0.371831	0	0	0.224661	0
FBgn0003209	raw	_2	0	0.175734	0	1.14839	1.79613	1.14839	0	0.263288	0	0	0	0
FBgn0003514	sqh	_2	0.782052	0.655265	0.655265	1.76876	1.0396	1.0396	0.811335	1.05442	0.811335	1.71625	0.101663	0.101663
FBgn0003714	tko	_2	0.438437	0.69672	0.438437	1.13221	0.609211	0.609211	0.093361	0	0	2.12116	0.332518	0.332518
FBgn0003884	alphaTub84B	_2	1.05428	0.51707	0.51707	1.2529	0.389325	0.389325	0.722042	2.46256	0.722042	1.1584	0.0280797	0.0280797
FBgn0003886	alphaTub85E	_2	1.40925	0.443623	0.443623	1.07181	0.277283	0.277283	0.663552	0.73745	0.663552	1.29741	0.0638773	0.0638773
FBgn0003889	betaTub85D	_2	0.539987	0.420333	0.420333	0.809175	0.297497	0.297497	0.530444	0.712801	0.530444	0.618216	0.0198421	0.0198421
FBgn0003978	vls	_2	0	0.473824	0	1.7413	0	0	0.317348	0.197132	0.197132	0	0	0
FBgn0004066	Prosalpha4	_2	1.96077	0.828975	0.828975	2.48128	0.820583	0.820583	0	0.787158	0	2.26806	1.32108	1.32108
FBgn0004425	LysB	_2	0	0	0	1.69362	0	0	0	0	0	1.27705	0	0
FBgn0004654	Pgd	_2	0.723974	0.212675	0.212675	2.98489	0.128685	0.128685	0.824616	0.00133353	0.00133353	0.44526	0.623399	0.44526
FBgn0004921	Ggamma1	_2	0	1.26607	0	1.09083	0.113529	0.113529	1.63091	0.398141	0.398141	0	0	0
FBgn0005411	U2af50	_2	0.755495	0.385792	0.385792	0.863921	0	0	0.754573	1.34076	0.754573	0	0	0
FBgn0005536	Mbs	_2	0.132133	0	0	0.832325	0.629503	0.629503	0.497457	0.773775	0.497457	0.101276	0.256189	0.101276
FBgn0005649	Rox8	_2	0.0582078	0	0	2.52278	0	0	0.699789	0.219159	0.219159	0	0	0
FBgn0010043	GstD7	_2	0	0.639938	0	0.798899	1.27581	0.798899	0	0.344638	0	0.387148	1.01643	0.387148
FBgn0010051	Itp-r83A	_2	0	0.0720197	0	3.34072	0.107686	0.107686	0.736629	0.540819	0.540819	0.929362	0	0
FBgn0010292	bys	_2	0.668557	0.22215	0.22215	1.35719	0	0	0	0	0	0	0	0
FBgn0010387	Dbi	_2	0.778691	2.54695	0.778691	3.48205	0.49251	0.49251	0.0472019	0.976607	0.0472019	0.507325	0.225185	0.225185
FBgn0010741	Pfdn2	_2	0.407296	2.36039	0.407296	2.80757	0.87067	0.87067	1.99207	1.01916	1.01916	1.14072	1.02891	1.02891
FBgn0010803	TrpRS	_2	0	0.0437702	0	2.3521	0.292369	0.292369	0.0459876	0.146677	0.0459876	0.21326	0	0
FBgn0010812	unc-45	_2	0	0.435848	0	2.01449	1.17682	1.17682	0	0	0	1.38782	0	0
FBgn0011230	poe	_2	0.351588	0.444296	0.351588	1.44908	0	0	2.43413	0.463157	0.463157	0	0	0
FBgn0011638	La	_2	0.16716	0.117095	0.117095	2.1754	0	0	1.03307	0.172365	0.172365	0.117406	0.187132	0.117406
FBgn0011708	Syx5	_2	0.828394	0.445998	0.445998	1.63042	0.902378	0.902378	0	0.152237	0	0.155105	0.0472314	0.0472314
FBgn0011726	tsr	_2	0.590199	1.10069	0.590199	3.92767	0.897702	0.897702	0.533097	0.632556	0.533097	0.679018	1.67015	0.679018
FBgn0011760	ctp	_2	0	0.393516	0	1.83181	0	0	0	0.182789	0	0.695731	0	0
FBgn0013303	Nca	_2	0	0.165834	0	0.827372	0.917162	0.827372	0	0.914925	0	0	0	0
FBgn0013762	Cdk5	_2	0	0	0	2.01566	0	0	0.441199	0	0	0.190119	0	0
FBgn0014002	Pdi	_2	0.321314	0.0976166	0.0976166	0.860563	1.31715	0.860563	0.0037983	0	0	2.68022	0	0
FBgn0014009	Rab2	_2	0.437108	0.283891	0.283891	0.28209	0.473963	0.28209	0.481437	1.50039	0.481437	0.165518	0	0
FBgn0014010	Rab5	_2	0.600749	1.10796	0.600749	2.50159	0.460654	0.460654	0.910311	1.77183	0.910311	0.562178	1.05148	0.562178
FBgn0014020	Rho1	_2	0.216053	0	0	0.117245	1.20023	0.117245	0.203311	1.2583	0.203311	0	0.45929	0
FBgn0014029	Sep2	_2	0.127768	0.101598	0.101598	1.0835	1.66433	1.0835	0	0.644505	0	1.71285	0.0416357	0.0416357
FBgn0014075	Uggt	_2	0.137644	0	0	1.00959	0	0	0.155149	1.71741	0.155149	0.0708819	0	0
FBgn0015277	Pi3K59F	_2	0	0	0	1.26399	0	0	0	0	0	0	0	0
FBgn0015359	CG2034	_2	1.67919	1.42907	1.42907	2.19149	0	0	0	0	0	0	0	0
FBgn0015477	Rme-8	_2	0	0	0	1.78595	0.11699	0.11699	0	0	0	0	0	0
FBgn0015521	RpS21	_2	0.0193287	0.0724326	0.0193287	2.51895	0	0	0	0	0	0	0	0
FBgn0015765	p38a	_2	0	0	0	1.61967	0.0193408	0.0193408	0	0	0	0	0.258488	0
FBgn0015795	Rab7	_2	0	0	0	2.08135	0.446297	0.446297	1.71548	0.232824	0.232824	0.183699	0	0
FBgn0016701	Rab4	_2	0.0455507	0.828918	0.0455507	0.709347	1.12083	0.709347	0.451841	0	0	0.0793605	0	0
FBgn0016756	Usp47	_2	0.387702	0	0	1.41659	0	0	0	0.912842	0	0.121571	0	0
FBgn0016984	sktl	_2	0	0	0	1.71856	0	0	0	0.596103	0	0	0	0
FBgn0017556	Prosalpha4T2	_2	0.429467	0.481577	0.429467	1.0202	0.327559	0.327559	0	0.247704	0	0.712189	0.505177	0.505177
FBgn0017581	Lk6	_2	0.416696	0	0	1.73007	0.10611	0.10611	0.43221	0	0	0.178445	0	0
FBgn0020305	dbe	_2	0.211015	0.355829	0.211015	1.37544	0	0	0	0	0	0	0	0
FBgn0020443	eRF3	_2	0.123351	0	0	2.47699	0.58117	0.58117	0.640489	0.328315	0.328315	0.799063	0.788425	0.788425
FBgn0021814	Vps28	_2	0	0	0	2.29678	0.878631	0.878631	0.187795	2.36281	0.187795	0.473941	0.0444321	0.0444321
FBgn0021825	DCTN2-p50	_2	0	0	0	1.12133	0	0	0	1.41762	0	0	0	0
FBgn0023129	aay	_2	0.230461	0.443421	0.230461	1.62964	0.564652	0.564652	0	2.04224	0	0.810839	0.552164	0.552164
FBgn0023170	RpL39	_2	2.26237	0.551642	0.551642	3.11768	1.01033	1.01033	0.51248	1.58475	0.51248	1.37694	1.64941	1.37694
FBgn0023174	Prosbeta2	_2	1.26425	0.784507	0.784507	2.66538	1.27214	1.27214	0.200979	0.349977	0.200979	2.04028	1.02165	1.02165
FBgn0023177	Pp4-19C	_2	0	1.06189	0	1.23592	1.27285	1.23592	0.94958	0.553745	0.553745	1.06237	0	0
FBgn0023477	Taldo	_2	1.14013	0.540739	0.540739	1.20039	1.34812	1.20039	0.866603	0.401168	0.401168	2.23109	0.127994	0.127994
FBgn0023541	Cyp4d14	_2	0	0.19024	0	4.19084	0.179894	0.179894	0	0	0	0	0	0
FBgn0023545	PIG-K	_2	0	0.857545	0	6.92903	0.485642	0.485642	0	0	0	0.62148	0	0
FBgn0024364	CG11417	_2	0.775535	0.45587	0.45587	1.522	0.132162	0.132162	0	0	0	0	0	0
FBgn0024432	Dlc90F	_2	0	0.450818	0	2.95756	0.156967	0.156967	2.16612	0	0	0.0517954	0.260692	0.0517954
FBgn0024986	CG3719	_2	1.29321	0	0	8.00576	0	0	1.41809	0.315381	0.315381	0	0	0
FBgn0024998	CG2685	_2	0	0	0	0.63871	0	0	2.00451	0.240337	0.240337	0	0	0
FBgn0025519	fidipidine	_2	0	0	0	1.11728	0	0	0.826356	0	0	0	0	0
FBgn0025608	Faf2	_2	0.11128	0.0964569	0.0964569	0.910926	0.202502	0.202502	1.0003	0.0200114	0.0200114	0.0234165	0.644827	0.0234165
FBgn0025637	SkpA	_2	0.0973214	0	0	0.604121	0.707023	0.604121	0	0	0	1.21801	0	0
FBgn0025836	RhoGAP1A	_2	0	0	0	1.30088	0	0	0	1.76289	0	0	0	0
FBgn0025865	Cortactin	_2	0.0215088	0	0	1.34476	0.189836	0.189836	1.80128	0.343328	0.343328	0.0282481	1.60988	0.0282481
FBgn0026079	Nsun2	_2	0.707855	0.354827	0.354827	1.31532	0.649461	0.649461	0.190133	0	0	0.549674	0	0
FBgn0026084	cib	_2	0.659648	1.2448	0.659648	4.02699	0.850504	0.850504	0.0615137	1.25675	0.0615137	1.03797	0	0
FBgn0026181	Rok	_2	0.0513764	0.435608	0.0513764	1.60938	0	0	1.34705	0.393368	0.393368	0	0.00317792	0
FBgn0026326	Mad1	_2	0	0.21952	0	0.671056	0.904509	0.671056	0	1.23579	0	0	0	0
FBgn0026371	SAK	_2	0	0	0	5.94288	0	0	0	0	0	0	0	0
FBgn0026380	Prosbeta3	_2	0.755815	2.83747	0.755815	3.49661	1.02219	1.02219	0.689915	0.690343	0.689915	0.989467	0.952953	0.952953
FBgn0026749	Yippee	_2	0.30262	0.256957	0.256957	2.11034	0	0	0.00234291	0	0	0.160523	0.269737	0.160523
FBgn0026755	Ugt37b1	_2	0.130478	0	0	0.673943	0.247323	0.247323	0.1069	1.45354	0.1069	0	0	0
FBgn0026879	CG13364	_2	0	0	0	2.32945	0.00583342	0.00583342	1.46434	0.293841	0.293841	1.25138	0.374518	0.374518
FBgn0027053	CSN5	_2	0	0.129535	0	1.44944	0.234025	0.234025	0	0.624488	0	0.107022	0	0
FBgn0027057	CSN1b	_2	0.718547	0	0	2.24786	0.81864	0.81864	0	0.340776	0	0	0	0
FBgn0027086	IleRS	_2	1.29146	0.625281	0.625281	2.90419	1.32174	1.32174	2.05885	1.0751	1.0751	1.88328	0.803581	0.803581
FBgn0027087	HisRS	_2	0	0.302513	0	0.585773	0.740684	0.585773	0.809121	0.87304	0.809121	0.427897	0	0
FBgn0027088	GlyRS	_2	0.0943155	1.1568	0.0943155	2.80204	1.25443	1.25443	1.2927	0.00217633	0.00217633	1.25953	0.879939	0.879939
FBgn0027090	GlnRS	_2	0.546179	0.322587	0.322587	4.43117	0.672132	0.672132	1.14901	0.993059	0.993059	1.39847	0.340765	0.340765
FBgn0027093	ArgRS	_2	0.852891	0.0177781	0.0177781	2.40894	1.92243	1.92243	1.05008	0.377447	0.377447	2.36927	0.202584	0.202584
FBgn0027287	Gmap	_2	0.161569	0.256533	0.161569	1.5946	0.227394	0.227394	0	0.0752244	0	0	0	0
FBgn0027360	Tim10	_2	0.353761	0	0	2.3194	0.0974177	0.0974177	1.95975	0	0	0.379364	0.83301	0.379364
FBgn0027363	Stam	_2	0	0	0	1.90314	0.559696	0.559696	0.910911	1.03165	0.910911	1.51017	0.712503	0.712503
FBgn0027525	LTV1	_2	0	0.0260975	0	1.63499	1.01496	1.01496	0	0	0	0	0	0
FBgn0027548	nito	_2	0	0	0	0.879526	0.500993	0.500993	0	1.55436	0	0	0	0
FBgn0027569	cert	_2	0	0	0	2.09313	0	0	0.0271628	0.136536	0.0271628	0	0	0
FBgn0027572	CG5009	_2	0	1.14509	0	1.05505	1.08225	1.05505	0	0	0	0.367298	1.47072	0.367298
FBgn0027948	msps	_2	0	0	0	1.8683	0.261151	0.261151	0	0	0	0	0	0
FBgn0028336	l(1)G0255	_2	0.250339	0.337208	0.250339	1.64538	0.244242	0.244242	0.2651	0.740253	0.2651	0.322285	1.02992	0.322285
FBgn0028341	Ptpmeg2	_2	0	0.636812	0	1.50593	0.384498	0.384498	0.728684	0.136051	0.136051	0	0	0
FBgn0028426	RNaseZ	_2	0.247244	0	0	1.85749	0.289237	0.289237	0	0.427304	0	0	0	0
FBgn0028475	Hrd3	_2	0.535663	0.0706255	0.0706255	1.42849	1.04962	1.04962	0	0.173028	0	0.296414	0.0330089	0.0330089
FBgn0028691	Rpn9	_2	1.26447	0.647424	0.647424	3.5411	1.46351	1.46351	0.0111491	0.881373	0.0111491	1.84812	1.18951	1.18951
FBgn0028695	Rpn1	_2	0.835394	1.20791	0.835394	2.63092	0.73698	0.73698	0	0.937977	0	1.92427	1.81403	1.81403
FBgn0028837	CSN6	_2	0	0	0	2.521	0.0178045	0.0178045	0.4107	0.407926	0.407926	0	0	0
FBgn0028988	Spn42Dd	_2	0	0	0	3.81869	0	0	0	0	0	0.436921	0	0
FBgn0029093	cathD	_2	0	0	0	0.0855132	2.06261	0.0855132	0.0719668	0.658472	0.0719668	2.02658	0	0
FBgn0029113	Uba2	_2	0.334224	1.19846	0.334224	0.996204	0.064705	0.064705	0.255256	0.0880397	0.0880397	1.22981	0.023524	0.023524
FBgn0029133	REG	_2	0.387402	0.51257	0.387402	2.9644	1.02971	1.02971	0.638145	0.475384	0.475384	1.32867	1.44702	1.32867
FBgn0029148	NHP2	_2	2.15277	0.543817	0.543817	4.76279	0.503474	0.503474	0.8025	0.880054	0.8025	0	1.14405	0
FBgn0029153	Menl-2	_2	0	0	0	0.481786	1.21851	0.481786	0.320322	0	0	0.956875	0.330541	0.330541
FBgn0029158	Las	_2	0	0	0	1.97164	0	0	0	0	0	0	0	0
FBgn0029789	PGAP1	_2	0	0	0	1.90291	0	0	0.984373	0	0	0	0	0
FBgn0029804	CG3097	_2	0.33467	0.220219	0.220219	1.57486	0	0	0	0	0	0	0	0
FBgn0029818	GAA1	_2	0	0.688689	0	7.60553	1.28725	1.28725	0	0	0	1.45645	0	0
FBgn0029971	ND-MNLL	_2	0.798992	0	0	2.44005	0.0466333	0.0466333	0.873268	0	0	0	0.272981	0
FBgn0029992	Upf2	_2	0	0	0	1.14265	0	0	0.0335619	0	0	0	0	0
FBgn0030007	alpha-PheRS	_2	0.849699	0.395586	0.395586	3.24949	0.887315	0.887315	2.32481	1.0767	1.0767	1.09717	0	0
FBgn0030052	CG12065	_2	1.00221	0.638046	0.638046	1.67108	0.167431	0.167431	0.627478	1.36233	0.627478	0.832381	0.0864854	0.0864854
FBgn0030056	CG11284	_2	0.20346	1.04872	0.20346	2.9171	1.3134	1.3134	0.691471	0	0	0	0	0
FBgn0030057	Ppt1	_2	0.417927	0	0	1.83941	0	0	0	0	0	0.505742	0	0
FBgn0030096	Zpr1	_2	0	0	0	2.53775	0	0	0.229329	0	0	0.13205	0	0
FBgn0030141	Gga	_2	0.193706	0	0	1.14852	0.603959	0.603959	0.16789	1.25618	0.16789	0.248557	0	0
FBgn0030160	CG9691	_2	0.180483	1.00381	0.180483	1.07429	0	0	0.331255	1.23234	0.331255	0	0.214614	0
FBgn0030234	CG15211	_2	0.147964	0	0	1.73711	1.21317	1.21317	0.4266	0	0	1.23077	0.539221	0.539221
FBgn0030239	CG17333	_2	0.443451	0	0	0.60368	0.798703	0.60368	0.532494	0.110997	0.110997	1.01804	0.43164	0.43164
FBgn0030276	Dlic	_2	0	0	0	1.47556	0	0	0.121702	0	0	0	0	0
FBgn0030318	rho-4	_2	0	0.717275	0	1.26198	0.252461	0.252461	1.35615	0.149046	0.149046	0	0	0
FBgn0030354	Upf1	_2	0	0	0	1.89582	0.318073	0.318073	0.791861	0	0	0	0	0
FBgn0030411	CG2540	_2	0	0	0	3.33405	0	0	0	0	0	0	0	0
FBgn0030486	Set2	_2	0	0	0	4.51046	0	0	0	0	0	0	0	0
FBgn0030487	CG12726	_2	0	0	0	1.50057	0	0	0	0	0	0.190058	0	0
FBgn0030608	Lsd-2	_2	0.604544	0	0	2.89181	0.817943	0.817943	0	2.4431	0	0.374896	2.35961	0.374896
FBgn0030641	CG6299	_2	0.773893	1.02303	0.773893	1.97509	0	0	0	0	0	0	0	0
FBgn0030686	mRpL3	_2	0.314302	1.47635	0.314302	1.45949	1.67774	1.45949	0	0.157621	0	1.43845	0.493388	0.493388
FBgn0030761	CG9784	_2	0.978154	0	0	2.14965	1.18352	1.18352	0.196546	0.030043	0.030043	0	0	0
FBgn0030774	spheroide	_2	0	0	0	0.954461	1.95002	0.954461	0	0	0	0	0	0
FBgn0030789	Rrp45	_2	0.918343	0.411859	0.411859	0.425624	0.920663	0.425624	0	0	0	0	0	0
FBgn0030839	CG5613	_2	0	0.612499	0	1.04716	1.04135	1.04135	0	0	0	0	0	0
FBgn0030951	CG6873	_2	0.104787	0.0728047	0.0728047	0.926021	0.0658556	0.0658556	0.357265	0.584652	0.357265	0.605677	0.897037	0.605677
FBgn0031030	Tao	_2	0	0.0268622	0	0.882506	1.19851	0.882506	0.248582	0.735233	0.248582	0	0	0
FBgn0031217	CG11377	_2	0.515274	0.213939	0.213939	1.54776	0.445742	0.445742	1.08274	0.0823045	0.0823045	0	0	0
FBgn0031245	CG3625	_2	0	0.264039	0	1.39731	0	0	0	0.203183	0	0	0.00109018	0
FBgn0031265	CG2794	_2	0	0	0	1.26447	0	0	0	0	0	0	0	0
FBgn0031392	AIF	_2	0.107461	0.0923162	0.0923162	1.21041	0.921757	0.921757	0.758331	1.09797	0.758331	2.12797	0.108443	0.108443
FBgn0031437	Arpc5	_2	2.62233	0.491161	0.491161	3.22037	0	0	1.05332	0.447211	0.447211	0	0.216477	0
FBgn0031442	Prosbeta4R1	_2	0.459642	0.508704	0.459642	1.1941	0.386748	0.386748	0	0.391569	0	0.776318	0.579629	0.579629
FBgn0031443	Prosbeta4R2	_2	0.493297	0.537955	0.493297	1.22428	0.448061	0.448061	0	0.359673	0	0.834658	0.622735	0.622735
FBgn0031451	CG9961	_2	0	0	0	2.36541	0	0	0	0	0	0	0	0
FBgn0031453	Bacc	_2	1.65764	0.59184	0.59184	2.50591	0.688803	0.688803	0.19205	0.0078541	0.0078541	0.433008	0.109537	0.109537
FBgn0031534	Snx1	_2	0.174601	0.510819	0.174601	2.90881	1.23685	1.23685	0.77116	0.885047	0.77116	0.468536	0.700441	0.468536
FBgn0031544	CG17593	_2	0.247681	0.470455	0.247681	0.462034	1.42227	0.462034	0.377263	0.156306	0.156306	1.5224	0	0
FBgn0031598	Vps53	_2	0	0	0	1.91948	0.252242	0.252242	0	0.371657	0	0	0	0
FBgn0031635	tank	_2	0.81448	0.946977	0.81448	2.82776	0.161174	0.161174	0.153866	0.0630942	0.0630942	0	0.195543	0
FBgn0031651	mRpL24	_2	0.123997	0	0	0.393524	1.2069	0.393524	0.272245	0.405995	0.272245	0.354376	0.0644321	0.0644321
FBgn0031660	mRpL28	_2	0	0.217788	0	1.59858	0.118681	0.118681	0	0.164605	0	1.48879	0	0
FBgn0031675	CG9121	_2	0.0564207	0.420631	0.0564207	2.00237	0.226956	0.226956	0	0.795532	0	1.08074	0	0
FBgn0031711	CG6907	_2	2.00236	1.76673	1.76673	2.63954	0	0	0	0	0	0	0	0
FBgn0031741	CG11034	_2	0	0	0	1.52708	1.7856	1.52708	0	0	0	0	0	0
FBgn0031865	Nha1	_2	0	0	0	1.45997	0	0	0	0	0	0	0	0
FBgn0031883	Caper	_2	0	0	0	1.78119	0	0	0	0	0	0	0	0
FBgn0031979	CCDC53	_2	0.756502	0	0	2.27526	0	0	0	0	0	0.57306	0	0
FBgn0031987	CG12375	_2	0.453836	0.910205	0.453836	1.11982	1.45947	1.11982	0	0	0	0.0574408	0	0
FBgn0031996	CG8460	_2	0	0	0	1.43434	0.0335309	0.0335309	0.446302	0	0	0	0	0
FBgn0032006	Pvr	_2	0	0	0	1.49825	0.08791	0.08791	0	0	0	0	0	0
FBgn0032010	CG8086	_2	0	0.942186	0	0.700178	1.22669	0.700178	0.833781	0	0	0	1.6884	0
FBgn0032022	CG14275	_2	0.00471768	1.35938	0.00471768	1.06789	1.5543	1.06789	0.206138	0.665116	0.206138	0	0	0
FBgn0032051	CG13097	_2	0.584024	0.682224	0.584024	1.38038	0	0	0	0	0	0	0	0
FBgn0032052	PIG-U	_2	0	0	0	1.26638	0	0	0.504267	0	0	0	0	0
FBgn0032067	LManIV	_2	0	0	0	0.683186	2.01775	0.683186	0	0	0	0.0320774	0	0
FBgn0032171	CG5846	_2	0.230203	0	0	1.08804	0	0	0	0	0	1.87011	0	0
FBgn0032214	CG4968	_2	0	0	0	1.76691	0	0	0.111785	0.0341687	0.0341687	0	0	0
FBgn0032260	CG13144	_2	0	0	0	1.30422	1.89805	1.30422	0	0	0	0	0.765435	0
FBgn0032341	Reps	_2	0.221851	0	0	0.162839	0.433143	0.162839	0.385916	1.60389	0.385916	0.347033	0	0
FBgn0032393	CG12264	_2	0	0	0	2.29914	0.402389	0.402389	0	0	0	0	1.32915	0
FBgn0032467	CG9934	_2	0.114754	0.507967	0.114754	1.54592	0.175806	0.175806	1.59575	1.2208	1.2208	0.645485	0.86544	0.645485
FBgn0032481	CG16972	_2	0	0	0	1.87747	0.975892	0.975892	0	0	0	0	0	0
FBgn0032482	Pect	_2	0.757844	0.23871	0.23871	1.3649	0.405137	0.405137	0.014311	0.486505	0.014311	0.897523	0.692612	0.692612
FBgn0032492	Prosalpha6T	_2	0.45334	0.445806	0.445806	1.05976	0.365257	0.365257	0	0.222972	0	0.747928	0.459877	0.459877
FBgn0032586	Tpr2	_2	0.790581	0	0	1.42415	0	0	0	0	0	0	0	0
FBgn0032596	Prosbeta4	_2	1.70882	1.49307	1.49307	3.01392	0.746372	0.746372	0.621645	1.0347	0.621645	1.46635	1.59599	1.46635
FBgn0032597	CG17904	_2	0.178303	0.0397483	0.0397483	1.49467	0	0	0.635453	0	0	0.0752988	0	0
FBgn0032620	CG12288	_2	0.272737	0.0789531	0.0789531	0.746553	0	0	1.49495	0.163867	0.163867	0	0.635234	0
FBgn0032640	Sgt	_2	0	0.248101	0	1.17996	1.63349	1.17996	0	0.172483	0	1.96761	0.451121	0.451121
FBgn0032774	CG17549	_2	0.87475	0.0684584	0.0684584	0.544055	0	0	0.385179	2.01487	0.385179	1.81662	0.376129	0.376129
FBgn0032882	Ns4	_2	0	0.284273	0	1.96731	0	0	0	0	0	0	0	0
FBgn0033038	CG7791	_2	0.74789	0.8155	0.74789	2.22268	0	0	0	0.787563	0	0	0.00784325	0
FBgn0033050	Pngl	_2	0.732979	0	0	1.73332	0.147599	0.147599	0.302926	0.176771	0.176771	0	0.0442091	0
FBgn0033079	Fmo-2	_2	1.01228	0	0	1.35044	0.971014	0.971014	0	0	0	0	0.140383	0
FBgn0033089	CG17266	_2	0.114658	0	0	0.965602	1.72156	0.965602	0	0	0	0	0	0
FBgn0033330	CG8746	_2	0	0	0	1.51045	0	0	0	0	0	0	0	0
FBgn0033339	Sec31	_2	0.174968	0.952101	0.174968	0.706134	1.1086	0.706134	0	1.09536	0	0.333056	0.123614	0.123614
FBgn0033351	AIMP1	_2	0.581769	0.0346438	0.0346438	2.24719	0.57124	0.57124	0.972929	0.525142	0.525142	1.93582	0.926165	0.926165
FBgn0033379	Mys45A	_2	0.934234	0.214164	0.214164	1.57953	0.422805	0.422805	0	0	0	0	0	0
FBgn0033423	CG1809	_2	0	0	0	2.31783	1.47956	1.47956	0	0	0	0	0	0
FBgn0033473	CG12128	_2	1.17873	0.0680162	0.0680162	1.58934	0.336905	0.336905	0.0175364	0	0	0	0.00226313	0
FBgn0033475	CG12129	_2	0	0	0	1.21501	0	0	0.132148	0	0	0	0	0
FBgn0033547	CG12935	_2	0	0	0	0.175013	1.84648	0.175013	0.156385	1.13182	0.156385	0	0.523253	0
FBgn0033548	CG7637	_2	1.07487	0	0	4.01433	0	0	0.79031	0.257122	0.257122	0	1.4233	0
FBgn0033557	CG12325	_2	0.496605	0.974023	0.496605	1.64132	0	0	0	0	0	0	0	0
FBgn0033730	Cpr49Ag	_2	0.0968693	0	0	0.00351986	1.11819	0.00351986	0	0.939488	0	0.361992	0.601573	0.361992
FBgn0033885	DJ-1alpha	_2	0	0	0	1.04191	0.417484	0.417484	0	0.283362	0	1.3819	0	0
FBgn0033902	eIF3m	_2	0	0	0	2.18875	0	0	0	0	0	0.150805	2.41691	0.150805
FBgn0033907	mRpS16	_2	0.693029	0.278378	0.278378	0.997479	1.07758	0.997479	0.815545	0.0763848	0.0763848	1.72778	0.0498998	0.0498998
FBgn0033983	ADPS	_2	0	0.160236	0	2.19967	0	0	0	0	0	0	0	0
FBgn0034000	CG11808	_2	0	0	0	1.32136	0	0	0	0	0	0	0	0
FBgn0034051	Mlf	_2	0	0.930358	0	0.488409	0.317241	0.317241	1.69283	0.354473	0.354473	0.372488	0.0417617	0.0417617
FBgn0034061	Ufc1	_2	0	0.0527098	0	1.79019	0.190769	0.190769	0	0.140491	0	0.0432694	0	0
FBgn0034065	Rrp42	_2	0.890883	0.743581	0.743581	0.524377	0.932059	0.524377	0	0	0	0	0	0
FBgn0034117	CG7997	_2	0.832961	0	0	3.60498	1.01579	1.01579	1.5606	0.684182	0.684182	0.125901	1.01263	0.125901
FBgn0034245	UQCR-6.4	_2	0.316263	0.288119	0.288119	1.1451	0.617277	0.617277	0.241107	0.204395	0.204395	1.39877	0	0
FBgn0034346	PIG-O	_2	0	0.147411	0	5.99451	0.485642	0.485642	0	0	0	1.7343	0	0
FBgn0034366	Atg7	_2	0.317745	0	0	0.57799	0.0148084	0.0148084	0.499142	1.74433	0.499142	0	0.194588	0
FBgn0034372	Gint3	_2	0	0.283591	0	0.549125	0	0	1.83096	0.510593	0.510593	0.069359	0	0
FBgn0034401	MetRS	_2	0.181409	0	0	3.04056	0.465406	0.465406	0.331189	1.95658	0.331189	1.10014	0.0736569	0.0736569
FBgn0034564	CG9344	_2	0.136111	0.171887	0.136111	0.545635	1.5252	0.545635	0.404581	1.03718	0.404581	0.336533	0	0
FBgn0034687	CG11475	_2	0	0	0	0.917326	1.40141	0.917326	0	0.0504954	0	0	0.48947	0
FBgn0034758	CG13510	_2	0.14134	0	0	3.46688	0.716834	0.716834	0.0661417	0.171459	0.0661417	0.0360064	1.1576	0.0360064
FBgn0034842	Prosbeta5R1	_2	0.520142	0.553542	0.520142	1.15785	0.37797	0.37797	0	0.212317	0	0.750681	0.543815	0.543815
FBgn0034915	eIF6	_2	2.34955	0.653038	0.653038	2.93576	1.05814	1.05814	0	0	0	0	0	0
FBgn0034946	CG3065	_2	0.807265	0	0	6.14854	0	0	0.851234	0.000341345	0.000341345	0	0	0
FBgn0034988	cN-IIIB	_2	0	0	0	1.23867	1.40009	1.23867	0	0	0	1.48112	0	0
FBgn0035044	CG3663	_2	0.0223034	1.15564	0.0223034	2.19983	0	0	0	0.241306	0	0.847872	0	0
FBgn0035059	CG3894	_2	0.0250036	0	0	1.61615	0	0	0	0	0	0	0	0
FBgn0035122	mRpL17	_2	0.0500213	0.272055	0.0500213	2.42875	0.567565	0.567565	0	0.0068487	0	0	0	0
FBgn0035206	CG9186	_2	2.12408	0.768551	0.768551	2.7158	0.497502	0.497502	0.954692	0.288902	0.288902	0	0.341749	0
FBgn0035235	CG7879	_2	0	0	0	1.01159	0	0	0.479365	0	0	0	0	0
FBgn0035244	ABCB7	_2	0	0.219472	0	0.542715	1.47458	0.542715	0	0	0	0.558902	1.39748	0.558902
FBgn0035251	Vta1	_2	0.227316	0.241681	0.227316	0.605347	0	0	0.66759	1.61502	0.66759	0.220356	0	0
FBgn0035266	Gk2	_2	0.59975	0.556638	0.556638	1.22334	0.310251	0.310251	0.212648	0.738467	0.212648	0.293032	0.219041	0.219041
FBgn0035334	CG8993	_2	0.754737	1.08855	0.754737	2.70562	0.435865	0.435865	0	0.127958	0	0.719655	0.714967	0.714967
FBgn0035355	CG16985	_2	0.0395062	0.437932	0.0395062	1.07659	0	0	2.28263	0.237626	0.237626	0.415789	0	0
FBgn0035375	Pgant6	_2	0	0	0	3.14017	0.948692	0.948692	0	0	0	0	0	0
FBgn0035424	CG11505	_2	0	1.49732	0	2.57386	1.5246	1.5246	0.660204	0	0	0	0.0802044	0
FBgn0035483	Mul1	_2	0	0.176836	0	1.02182	2.485	1.02182	0.932876	0.0825723	0.0825723	0.376571	0	0
FBgn0035511	Cpr64Ab	_2	0.586072	0	0	1.02268	1.95055	1.02268	1.14536	0	0	0.0314825	0	0
FBgn0035532	CG15014	_2	0.01898	0.0823302	0.01898	1.72593	0	0	0.388581	1.05799	0.388581	0.114745	0	0
FBgn0035534	mRpS6	_2	0.356548	0	0	1.05541	1.33021	1.05541	0.151773	0.256617	0.151773	0.135873	0	0
FBgn0035589	CHMP2B	_2	0	0.00615395	0	1.00457	1.04519	1.00457	0.62628	0.732354	0.62628	0	0.0058688	0
FBgn0035718	CG14820	_2	0	0	0	3.89129	0	0	0	0	0	0	0	0
FBgn0035726	CG9953	_2	0.222581	0	0	0.535386	2.00977	0.535386	0	0.0126399	0	1.92063	0	0
FBgn0035904	GstO3	_2	0.218357	0.634877	0.218357	0.745459	1.32028	0.745459	0	0.792914	0	0.646854	0.0830535	0.0830535
FBgn0035909	ergic53	_2	0.884278	0	0	2.05225	0.695796	0.695796	0.617264	0.399748	0.399748	0.558962	2.07617	0.558962
FBgn0035957	CG5144	_2	0.505705	0.810996	0.505705	0.648298	1.07906	0.648298	0	0.0517973	0	0	0	0
FBgn0036008	CG3408	_2	0	0	0	2.15139	0	0	0	0	0	0	0	0
FBgn0036035	CG18178	_2	0.858752	0	0	2.01902	0.141058	0.141058	0.0866677	0	0	0.150213	0	0
FBgn0036169	Fuca	_2	0	0.376533	0	1.94562	2.33471	1.94562	0.634965	0.0390428	0.0390428	0	0	0
FBgn0036224	Rpt4R	_2	0.366124	0.241645	0.241645	1.06747	0.363125	0.363125	0	0.664012	0	0.74434	0.548191	0.548191
FBgn0036298	nst	_2	0.154769	0.048144	0.048144	0.640087	0.370586	0.370586	0.119874	1.14025	0.119874	0.919517	0.682678	0.682678
FBgn0036309	Hip1	_2	0	0	0	1.96871	0	0	1.17462	0.175518	0.175518	0	0	0
FBgn0036316	CG10960	_2	0.436703	1.24904	0.436703	1.29207	1.5839	1.29207	0.130659	0.472386	0.130659	0.151928	0.431133	0.151928
FBgn0036341	Syx13	_2	0.367491	0.14545	0.14545	3.24896	0.614911	0.614911	0.3753	0	0	0	0	0
FBgn0036405	CG6833	_2	0	0	0	1.52884	0	0	0	0	0	0.191447	0	0
FBgn0036465	Rpn12R	_2	0.209426	0.122608	0.122608	1.06919	0.261587	0.261587	0	0.501065	0	0.632405	0.493333	0.493333
FBgn0036487	Prp31	_2	0.780803	0	0	0.75408	0.0908882	0.0908882	0.710901	1.41798	0.710901	0.000254441	0	0
FBgn0036500	CG7275	_2	0	0	0	1.38233	0	0	0	0	0	0	0	0
FBgn0036569	IleRS-m	_2	0.306788	0	0	0.506023	0.935735	0.506023	0.0182609	0.881266	0.0182609	0.602112	0	0
FBgn0036648	CG4098	_2	0.113909	0.677073	0.113909	1.1392	0	0	0.0239866	0.655839	0.0239866	0.929061	0	0
FBgn0036666	TSG101	_2	0	0	0	1.71958	0	0	0.329327	0.935077	0.329327	0	0.00402738	0
FBgn0036671	CG9951	_2	0	1.01435	0	0.504272	0.902913	0.504272	0.48874	0	0	0.262467	0	0
FBgn0036686	CG7728	_2	0.657421	0.2675	0.2675	1.3742	0	0	0	0	0	0	0	0
FBgn0036745	CG7484	_2	1.43299	0	0	2.84335	0	0	0	1.47441	0	0.762736	0	0
FBgn0036813	Atg3	_2	0.350388	0	0	1.20388	0.204724	0.204724	0.264258	0.540106	0.264258	0.228151	1.04633	0.228151
FBgn0036821	CG3961	_2	0.0167134	0.54978	0.0167134	1.52782	0	0	3.30603	0	0	0.445568	0.0927651	0.0927651
FBgn0036833	CG3819	_2	0	0	0	2.15395	0	0	0	0	0	0	0	0
FBgn0036846	MESR6	_2	0	0	0	2.17111	0	0	0.642659	0	0	0	0	0
FBgn0036848	CG10424	_2	0.136828	0.381879	0.136828	0.507106	1.06769	0.507106	0.34715	0	0	1.77765	0.257815	0.257815
FBgn0036887	CG9231	_2	0.861748	0	0	1.72849	0	0	0.471321	1.23514	0.471321	0.155691	1.75528	0.155691
FBgn0036919	Grasp65	_2	0	0	0	1.80587	1.12335	1.12335	0	0.0567731	0	0	0	0
FBgn0036928	Tom20	_2	2.19076	0.545807	0.545807	3.4978	1.2393	1.2393	0.663992	0.485763	0.485763	1.76628	0.716159	0.716159
FBgn0036974	eRF1	_2	0.940465	0.283733	0.283733	1.498	0.189791	0.189791	0.141882	0.92456	0.141882	0.430373	0.685913	0.430373
FBgn0037020	Pex14	_2	0	0	0	1.88578	0	0	0.116751	0	0	0	0	0
FBgn0037073	Tsr1	_2	0.72744	0.293086	0.293086	1.92579	0	0	0	0.00183601	0	0	0	0
FBgn0037135	CG7414	_2	0.0904306	0.373335	0.0904306	1.53161	0	0	0	1.62636	0	1.14417	0.607583	0.607583
FBgn0037144	CG7458	_2	0.351412	0.313003	0.313003	2.16952	0.116551	0.116551	0	0	0	0	0	0
FBgn0037283	CG14658	_2	0	0	0	1.46721	0	0	0	0	0	0	0	0
FBgn0037293	CG12007	_2	0	0	0	2.46169	0.90459	0.90459	0.216998	0.246192	0.216998	0	0	0
FBgn0037299	Vps37B	_2	0	0	0	2.03249	0.378761	0.378761	0.541097	0.512932	0.512932	0.639035	1.11432	0.639035
FBgn0037305	CG12173	_2	0.0687555	0	0	2.32534	0	0	0	0	0	0.0165929	0	0
FBgn0037340	CG14671	_2	0	0	0	1.07401	1.42294	1.07401	0	1.28909	0	0	0	0
FBgn0037342	CG2931	_2	0	0.167413	0	0.811542	0	0	1.92735	0.216515	0.216515	0	0	0
FBgn0037358	elm	_2	0	0.947937	0	0.767693	0.251609	0.251609	0.46294	1.15562	0.46294	0.687055	0	0
FBgn0037372	CG2091	_2	0	0.434025	0	2.46585	0	0	0.346362	0.632278	0.346362	0.16045	0.214147	0.16045
FBgn0037431	CG17917	_2	0.246279	1.68596	0.246279	1.16177	1.44603	1.16177	0	0	0	0	0.114391	0
FBgn0037432	CG10298	_2	0.0922918	1.71872	0.0922918	1.21862	1.50563	1.21862	0.28415	0	0	0.0634827	0.542891	0.0634827
FBgn0037465	CG1105	_2	0.655627	0	0	1.61106	0	0	0.0390943	0	0	0	0.305221	0
FBgn0037467	Ufl1	_2	1.36786	0	0	1.5249	0.51077	0.51077	0.2361	0.0847819	0.0847819	0.873102	0	0
FBgn0037607	CG8036	_2	1.27187	0.306563	0.306563	1.27542	1.52325	1.27542	1.70677	0.319507	0.319507	2.01627	0.0471478	0.0471478
FBgn0037815	Rrp46	_2	1.01628	1.3116	1.01628	2.27937	1.32779	1.32779	0.206024	0	0	0	0	0
FBgn0037852	Tpc1	_2	0	0.219169	0	2.68551	0	0	2.25763	0.0901536	0.0901536	0.655718	0	0
FBgn0037963	Cad87A	_2	0.0835088	0	0	2.43405	0	0	0	0	0	0	0	0
FBgn0038020	GstD9	_2	0	0.911904	0	1.4972	0	0	0.935888	0.556233	0.556233	0.750515	1.05291	0.750515
FBgn0038049	CG5844	_2	0	0.871971	0	5.69942	0	0	0	0	0	2.55159	1.19957	1.19957
FBgn0038058	CG5608	_2	0	0	0	1.77269	0.0950681	0.0950681	0	0.170242	0	0	0	0
FBgn0038082	CG5724	_2	0.101424	1.15978	0.101424	0.821544	1.31337	0.821544	0.176248	0	0	0	0	0
FBgn0038083	CG5999	_2	0	0	0	1.81211	0.150797	0.150797	0.176248	0	0	0	0	0
FBgn0038098	CG7381	_2	0	0	0	1.13078	2.16437	1.13078	0	0	0	0	0	0
FBgn0038145	Droj2	_2	0	0.012622	0	1.17442	0.166989	0.166989	0.033597	0.749855	0.033597	1.12067	0.808106	0.808106
FBgn0038196	CG9922	_2	0.32146	0.681333	0.32146	2.52423	0.172155	0.172155	0.325611	0.913182	0.325611	0.22865	0.195512	0.195512
FBgn0038302	CG4210	_2	0.595956	0	0	1.00393	0.876307	0.876307	0	0	0	0	0	0
FBgn0038376	Hmt-1	_2	0	0	0	3.17668	0	0	0	0	0	0.308302	0	0
FBgn0038400	CG5903	_2	0.585171	0.474446	0.474446	2.36306	0	0	0	0	0	0.187627	1.81766	0.187627
FBgn0038426	mRpS33	_2	0.0562947	0.682796	0.0562947	0.490128	1.72369	0.490128	0	0	0	0.396965	0.824956	0.396965
FBgn0038466	CG8907	_2	0	0	0	1.21941	0	0	0.106068	0	0	0	0	0
FBgn0038473	Ns1	_2	2.75587	0.241629	0.241629	3.36851	0.48951	0.48951	0.242623	0	0	0.00802068	0	0
FBgn0038481	CG17475	_2	0	0	0	4.03839	0.529451	0.529451	0.39946	0	0	0	0	0
FBgn0038519	Prx3	_2	0	0	0	1.16517	0	0	0.551693	0	0	0	0	0
FBgn0038577	CG12321	_2	0.552241	0.400844	0.400844	0.347453	1.51292	0.347453	0	0	0	1.39625	0.0544653	0.0544653
FBgn0038613	Vha100-4	_2	0.393886	0.706259	0.393886	0.690287	1.636	0.690287	0.143904	0.25686	0.143904	0	0.646813	0
FBgn0038788	Sirt2	_2	0.634832	0.264055	0.264055	2.15016	0	0	1.49617	0	0	0.718521	0	0
FBgn0038947	Sar1	_2	0.0984893	0.891897	0.0984893	1.00268	1.62797	1.00268	0	0.309805	0	0.496874	0.426828	0.426828
FBgn0038964	Nop56	_2	1.35574	1.14645	1.14645	2.08282	0.313059	0.313059	0	0	0	0	0	0
FBgn0038989	CG6937	_2	0.375943	0.234699	0.234699	1.0038	0.657167	0.657167	0	0	0	1.8487	0	0
FBgn0039051	CG17109	_2	0	0.385475	0	0.839948	1.99115	0.839948	0	0	0	0	0	0
FBgn0039052	CG6733	_2	0.0100087	0.786798	0.0100087	0.657292	1.2042	0.657292	0	0	0	0	0	0
FBgn0039099	GILT2	_2	0.623656	0	0	1.41314	1.99057	1.41314	1.44152	0	0	0	0	0
FBgn0039227	polybromo	_2	0.040778	0	0	0.542116	0.608413	0.542116	0.55613	0.763524	0.55613	0	0	0
FBgn0039313	CG11892	_2	0.174773	0.197556	0.174773	1.58515	0.11334	0.11334	0.0919464	0	0	0	0	0
FBgn0039323	CG10559	_2	0	0	0	3.03636	0	0	0.178992	0	0	0.223121	0	0
FBgn0039325	CG10560	_2	0.584001	1.74841	0.584001	1.59701	1.91345	1.59701	0	0	0	0.0311006	0	0
FBgn0039342	CG5107	_2	0	0	0	0.998502	1.70787	0.998502	0	0.137164	0	0	0.464526	0
FBgn0039348	Npl4	_2	0.669335	0.499933	0.499933	1.15229	0.0407581	0.0407581	0.867809	0.355197	0.355197	0.915014	0.732813	0.732813
FBgn0039471	CG6295	_2	0	0	0	2.33088	0	0	0	0	0	0	0	0
FBgn0039531	CG5611	_2	0	0.253288	0	3.98493	0	0	0	0	0	1.35456	0.501553	0.501553
FBgn0039580	Gfat2	_2	0.0364893	0.682602	0.0364893	3.20737	1.32018	1.32018	1.24669	0	0	0.0187203	0	0
FBgn0039773	CG2224	_2	0	0	0	2.94971	0	0	0.303033	0.356767	0.303033	0	0	0
FBgn0039788	Rpt6R	_2	0.422778	0.316555	0.316555	2.95284	0.458689	0.458689	0	1.73942	0	0.853735	0.790302	0.790302
FBgn0039802	dj-1beta	_2	0.236663	0	0	2.28641	1.22343	1.22343	0	1.01077	0	2.84295	0	0
FBgn0039854	CG1635	_2	0	0	0	0.813406	0.698087	0.698087	0.103437	0.382549	0.103437	1.06738	0.459596	0.459596
FBgn0039869	CG1890	_2	0.0109356	1.71034	0.0109356	1.54099	1.07933	1.07933	0.882351	0.608357	0.608357	1.4995	0.187798	0.187798
FBgn0040066	wds	_2	0	0	0	1.75941	0	0	0	0	0	0	0	0
FBgn0040228	DCTN5-p25	_2	0	0	0	1.59022	0.153913	0.153913	0.940098	0	0	0	0	0
FBgn0040319	Gclc	_2	0.410451	1.52066	0.410451	1.14525	0.870418	0.870418	0.375642	0.658274	0.375642	1.64975	0.626055	0.626055
FBgn0042710	Hex-t2	_2	0.0776273	0	0	0.892294	1.42581	0.892294	0.752188	0.306057	0.306057	1.40875	0	0
FBgn0043884	mask	_2	0.209086	0.371022	0.209086	0.743984	0.148072	0.148072	0	0.908326	0	0.342035	0.423138	0.342035
FBgn0044871	Gos28	_2	0.833361	0.428713	0.428713	2.19054	0.587646	0.587646	0	0	0	0	0	0
FBgn0046114	Gclm	_2	0.156066	0.94236	0.156066	2.98916	1.32582	1.32582	0.921814	1.92549	0.921814	1.08072	0.0868081	0.0868081
FBgn0050185	AIMP3	_2	0.887166	0.12034	0.12034	1.30479	0.736007	0.736007	0.648464	0.0843704	0.0843704	1.16555	0.183617	0.183617
FBgn0050349	CG30349	_2	0.716846	0.375185	0.375185	1.3777	0.267932	0.267932	0	0	0	0	0	0
FBgn0050382	CG30382	_2	0.723368	0.610145	0.610145	1.65169	0.607676	0.607676	0.0032047	0.457223	0.0032047	1.01641	0.777875	0.777875
FBgn0050410	Rpi	_2	0.511058	1.00386	0.511058	3.74769	0	0	0.479927	0.00699144	0.00699144	0.219108	0.677603	0.219108
FBgn0051087	CG31087	_2	0	0.241654	0	0.799529	2.53589	0.799529	0	0	0	0.0311006	0	0
FBgn0051148	Gba1a	_2	0.584834	0.251922	0.251922	3.11979	1.55803	1.55803	0	0	0	0	0	0
FBgn0051357	CG31357	_2	0.534188	0.576873	0.534188	2.13857	1.01766	1.01766	0	0	0	0	0	0
FBgn0051368	CG31368	_2	0.79357	0	0	1.39659	0.854605	0.854605	0.187232	0	0	0	0.176769	0
FBgn0051742	Prosbeta5R2	_2	0.473247	0.415972	0.415972	1.00135	0.280323	0.280323	0	0.0773773	0	0.60122	0.427505	0.427505
FBgn0052594	be	_2	0	0.414828	0	1.6444	0	0	0	0	0	0	0	0
FBgn0052649	CG32649	_2	1.24784	0.518918	0.518918	1.18999	0.0332715	0.0332715	0	0	0	1.12586	0	0
FBgn0061200	Nup153	_2	0	1.46872	0	2.03053	0.244078	0.244078	2.30188	0	0	0	0	0
FBgn0086346	ALiX	_2	0	0	0	1.35244	1.24395	1.24395	0.37995	1.16078	0.37995	0	0.243693	0
FBgn0086451	l(2)k09022	_2	0.204632	0.249081	0.204632	2.64789	0.853848	0.853848	0	0	0	0	0	0
FBgn0086532	Spt-I	_2	0.186952	0	0	0.665471	2.25816	0.665471	0	0	0	0	0	0
FBgn0086904	Nacalpha	_2	0.111176	0.684652	0.111176	3.05641	0.747552	0.747552	0.634515	0.345561	0.345561	0.747503	0	0
FBgn0087013	Karybeta3	_2	0.441215	0	0	1.43606	0	0	1.10458	0.377867	0.377867	0.210264	0	0
FBgn0250815	Jon65Aiv	_2	0	0.521664	0	1.13962	1.44902	1.13962	0	0	0	0	0	0
FBgn0260632	dl	_2	0	0	0	0.555321	0.682398	0.555321	0.244171	0	0	1.28381	0	0
FBgn0260744	Tango9	_2	0.329645	0	0	0.649722	2.67592	0.649722	0	0	0	0	0	0
FBgn0260855	Sec22	_2	0.939555	0.188186	0.188186	1.24078	0.371667	0.371667	0.334313	0.510475	0.334313	0.431111	0.604918	0.431111
FBgn0260858	Ykt6	_2	0.768489	0	0	0.849261	0.32725	0.32725	0.201971	1.71892	0.201971	1.20046	0.23743	0.23743
FBgn0260944	Rbp1	_2	0.809708	0	0	0.993508	1.10688	0.993508	0	0.129977	0	0.0262948	0	0
FBgn0261064	Rbsn-5	_2	0.463697	0.429007	0.429007	0.719849	0.225106	0.225106	0.332305	1.67338	0.332305	0.359928	0.0266256	0.0266256
FBgn0261068	LSm7	_2	0.242334	1.29144	0.242334	1.51579	1.45742	1.45742	0.204509	0.554295	0.204509	0	0.563161	0
FBgn0261112	APP-BP1	_2	0.413727	0.580829	0.413727	1.41212	0.308814	0.308814	0.0512274	0.132258	0.0512274	0.719154	0	0
FBgn0261394	Prosalpha3	_2	1.08404	0.641734	0.641734	3.36289	1.42494	1.42494	0.0238723	0.664422	0.0238723	1.00411	0.994426	0.994426
FBgn0261397	didum	_2	0.480378	0.159369	0.159369	0.82523	0.477376	0.477376	0.953628	0.70462	0.70462	1.0826	0.622863	0.622863
FBgn0261560	Thor	_2	0.349728	0	0	1.30198	0.0220771	0.0220771	0	0.22064	0	0.823675	0	0
FBgn0261611	CG42700	_2	0	0.772833	0	0.984114	0	0	0	0.916714	0	0.904032	0	0
FBgn0263106	DnaJ-1	_2	1.12005	0.510599	0.510599	1.93966	0.395653	0.395653	0	0.334591	0	0.118065	1.94979	0.118065
FBgn0263594	lost	_2	0	0.265786	0	1.85344	0	0	0	0.0743405	0	0.843501	1.33841	0.843501
FBgn0263697	Uba3	_2	1.43035	0.640838	0.640838	2.98713	0.0782786	0.0782786	0.523999	0.674289	0.523999	0.036041	0	0
FBgn0264815	Pde1c	_2	0	0.595438	0	1.40821	0.423428	0.423428	0.58865	0.832457	0.58865	0.99977	0.546322	0.546322
FBgn0265042	Irk1	_2	0	0	0	1.41668	0.308913	0.308913	0.835788	0	0	0	0	0
FBgn0265606	Prosalpha4T1	_2	0.460523	0.499857	0.460523	1.09467	0.364051	0.364051	0	0.254959	0	0.770479	0.524588	0.524588
FBgn0266420	Ote	_2	0	0.78823	0	2.00819	0	0	3.04642	0	0	0	0.933517	0
FBgn0266465	GckIII	_2	0.0999802	0.263188	0.0999802	1.34959	1.28898	1.28898	0.838893	0.716106	0.716106	0.751108	0	0
FBgn0266720	Snap24	_2	0.183208	0.386624	0.183208	2.37123	0.268511	0.268511	1.2576	0.786845	0.786845	0.671585	0.580534	0.580534
FBgn0270927	betaGlu	_2	0.907241	0.591905	0.591905	1.02096	1.17581	1.02096	0.0494225	0	0	0.0681014	0	0
FBgn0284243	betaTub56D	_2	0.516936	0.241	0.241	0.558572	0	0	0.44138	0.619248	0.44138	0.367964	0	0
FBgn0284253	LeuRS	_2	0.438077	0	0	1.5587	0.495697	0.495697	0.358216	0.205741	0.205741	1.37911	0.203495	0.203495
FBgn0284436	CCT8	_2	0.0655433	1.47252	0.0655433	1.73472	1.38256	1.38256	1.34759	0.366628	0.366628	1.45113	0.158925	0.158925
FBgn0000283	Cp190	_6	0	0	0	1.87061	0.869924	0.869924	1.44219	0.481767	0.481767	0	1.57748	0
FBgn0000299	Col4a1	_6	0	0	0	1.11137	1.70329	1.11137	0.799809	0.324576	0.324576	0	1.74464	0
FBgn0000721	for	_6	0	0	0	0.205662	1.00297	0.205662	0.506635	1.20786	0.506635	0	1.48376	0
FBgn0001224	Hsp23	_6	0	0.685923	0	0.237577	0	0	0.730336	1.31133	0.730336	1.01764	1.5694	1.01764
FBgn0002921	Atpalpha	_6	0	0	0	0.793704	0.564951	0.564951	1.47328	0.230574	0.230574	0.313105	2.3571	0.313105
FBgn0003149	Prm	_6	0.195714	0	0	0	1.64415	0	2.83041	1.41837	1.41837	0.279686	4.64677	0.279686
FBgn0004167	kst	_6	1.13089	2.13393	1.13089	0.585389	0.0985488	0.0985488	0.187776	0.223541	0.187776	0.272567	2.11311	0.272567
FBgn0004580	Cbp53E	_6	0.330639	1.55594	0.330639	0	0	0	0	0	0	0	2.37401	0
FBgn0004636	Rap1	_6	0	0	0	0	1.12446	0	1.60446	0.554253	0.554253	0	3.80976	0
FBgn0005564	Shal	_6	0	0	0	0	0	0	0.196658	0.190596	0.190596	0	1.50475	0
FBgn0010019	Cyp4g1	_6	0.402362	1.85026	0.402362	0.108437	0.137898	0.108437	1.84198	0	0	0	2.98048	0
FBgn0010040	GstD4	_6	0.200347	0.894297	0.200347	2.29024	0	0	0	0.356101	0	0.429872	4.97895	0.429872
FBgn0010551	Phb2	_6	1.5054	0	0	1.44601	1.39043	1.39043	1.08525	0.838363	0.838363	1.44559	3.97859	1.44559
FBgn0010602	lwr	_6	0.705681	1.23947	0.705681	0.115887	0	0	0.176094	0	0	0.176136	1.77346	0.176136
FBgn0011227	ox	_6	0.276036	1.65476	0.276036	1.25453	1.5217	1.25453	1.93061	0.067268	0.067268	0.223008	2.01411	0.223008
FBgn0011570	cpb	_6	0.215033	0.145331	0.145331	0.730763	0.880135	0.730763	0.453886	0.353063	0.353063	0	1.44207	0
FBgn0011695	EbpIII	_6	0	1.19292	0	0	1.27761	0	0	0.360961	0	0.366432	4.91108	0.366432
FBgn0014026	RpL7A	_6	1.47652	0	0	0.402384	0.587446	0.402384	0	1.10269	0	0.204423	3.68909	0.204423
FBgn0014141	cher	_6	0.596792	0.920991	0.596792	0	1.0322	0	0.426743	0.147768	0.147768	0.393022	1.74889	0.393022
FBgn0014391	sun	_6	0.893933	0	0	1.40241	2.39245	1.40241	1.74522	0.0612769	0.0612769	0.27121	2.34939	0.27121
FBgn0015664	Dref	_6	0	0	0	0	0	0	0.537018	2.74541	0.537018	0.197303	3.68523	0.197303
FBgn0019960	Mitofilin	_6	0.238148	0	0	0.417552	0.267441	0.267441	0.629231	1.72726	0.629231	1.12893	1.65767	1.12893
FBgn0020389	Papss	_6	1.75771	1.60487	1.60487	0	0	0	0	0	0	0	1.25822	0
FBgn0020621	Pkn	_6	0	0	0	0.367419	0.0581586	0.0581586	0.161884	0.425883	0.161884	0.15847	2.2813	0.15847
FBgn0020660	eIF4B	_6	0.417457	0	0	0	0.481408	0	1.36847	0.860328	0.860328	0	1.8343	0
FBgn0021768	nudC	_6	0.308745	0.877897	0.308745	0.902407	1.67008	0.902407	0	1.67844	0	0.0367306	2.05628	0.0367306
FBgn0022097	Vha36-1	_6	0.347019	1.21815	0.347019	1.10983	0.42373	0.42373	1.19066	0.972723	0.972723	0.0254463	3.41161	0.0254463
FBgn0023083	fray	_6	0	0	0	0.0691659	0	0	0.383558	1.39012	0.383558	0.460004	2.11864	0.460004
FBgn0025809	Paf-AHalpha	_6	0.287137	0.550928	0.287137	0.10474	0.616643	0.10474	0.935173	0.864699	0.864699	0.12498	1.23338	0.12498
FBgn0025866	CalpB	_6	0.856619	0	0	0	1.03599	0	1.02124	0.591793	0.591793	0.342513	1.89928	0.342513
FBgn0025885	Inos	_6	0.910363	1.18335	0.910363	0	0	0	0	0	0	0	1.9149	0
FBgn0026415	Idgf4	_6	0	0.11517	0	0.203915	0.964822	0.203915	0	0	0	0.345134	3.35517	0.345134
FBgn0026479	Drp1	_6	0.152825	0.132386	0.132386	0.367888	0.1602	0.1602	0.932971	1.12542	0.932971	0.481407	1.54986	0.481407
FBgn0026666	MagR	_6	0	0	0	0	0	0	0	0	0	0.883193	2.95248	0.883193
FBgn0027079	ValRS	_6	0.692849	0.817586	0.692849	0.528401	1.93067	0.528401	2.28807	1.23086	1.23086	1.03953	4.31945	1.03953
FBgn0027291	l(1)G0156	_6	2.86677	0.299922	0.299922	0.676569	1.45057	0.676569	1.31843	1.07066	1.07066	0.926421	3.26103	0.926421
FBgn0028582	lqf	_6	0.654875	0.381933	0.381933	0.303528	0.455435	0.303528	1.83181	0.788664	0.788664	0.135163	1.85234	0.135163
FBgn0028734	Fmr1	_6	0.730836	0.996796	0.730836	0.221601	0.507152	0.221601	0.486124	0.342588	0.342588	0.539462	1.37617	0.539462
FBgn0028984	Spn88Ea	_6	0.0381022	1.99609	0.0381022	0.0414478	0.951424	0.0414478	0	0	0	0.610585	2.56087	0.610585
FBgn0029092	ced-6	_6	0	0.758054	0	0	0	0	1.44843	1.05894	1.05894	0	1.87903	0
FBgn0029502	COQ7	_6	0	0	0	1.31176	0	0	0.022495	1.18952	0.022495	0.601827	3.52455	0.601827
FBgn0029865	CG15893	_6	0	0	0	0	0	0	0	0	0	0	2.13513	0
FBgn0029882	CG3226	_6	0.793888	1.52667	0.793888	0	0	0	1.54141	0	0	0.644992	1.65249	0.644992
FBgn0030087	CG7766	_6	0.590582	2.32079	0.590582	0.154265	0	0	0	0.0592724	0	0.129606	3.7441	0.129606
FBgn0030447	CG2200	_6	0	0.807132	0	1.53483	0	0	0	1.02385	0	0	2.57077	0
FBgn0030451	CG15717	_6	0	0.756933	0	0	0	0	0	0	0	0	2.2294	0
FBgn0030749	AnxB11	_6	0	0.457682	0	0	0.986769	0	1.02789	1.17065	1.02789	0.25604	1.27745	0.25604
FBgn0030918	CG15056	_6	0	0	0	0	0	0	1.65739	0.168529	0.168529	0	1.77519	0
FBgn0030932	Ggt-1	_6	0.157932	0.0491893	0.0491893	0	0	0	0	0	0	0	1.30667	0
FBgn0031021	ND-18	_6	0.165377	0	0	1.88537	0.897524	0.897524	1.25854	0	0	0.024617	0.992749	0.024617
FBgn0031092	CG9577	_6	0	1.49164	0	1.41832	0	0	2.53275	0	0	0.670093	2.9765	0.670093
FBgn0031190	CG12576	_6	0	0	0	0.829527	0	0	0	0	0	0	2.08446	0
FBgn0031478	CG8814	_6	0.63047	0.420301	0.420301	0	0	0	0.25523	0.346031	0.25523	0	4.84612	0
FBgn0031479	Prx6005	_6	0	1.48746	0	0	1.68902	0	0	1.80066	0	0.215178	2.42477	0.215178
FBgn0031663	CG8891	_6	0.219215	0.464645	0.219215	0.0342691	0.402212	0.0342691	0.0674236	1.49304	0.0674236	0.412093	1.46964	0.412093
FBgn0031692	TpnC25D	_6	0.151092	0	0	1.48406	2.00759	1.48406	1.30118	2.10541	1.30118	0.371104	4.39566	0.371104
FBgn0031907	CG5171	_6	0.10608	0.0389953	0.0389953	1.09542	0	0	0.0128201	1.78831	0.0128201	0	2.72614	0
FBgn0031971	Sirup	_6	0	1.08108	0	0	0	0	0	0.683101	0	0	2.3168	0
FBgn0031995	CG8475	_6	0.361028	1.58274	0.361028	0	0	0	0	0	0	0	6.4723	0
FBgn0032005	Snx6	_6	0	0	0	0.526182	0	0	0.610537	0.874375	0.610537	0.0924692	1.17776	0.0924692
FBgn0032026	CG7627	_6	1.89441	0.443473	0.443473	0.344729	0.0588467	0.0588467	0	0	0	1.247	3.31423	1.247
FBgn0032129	jp	_6	0	0	0	0.0518159	0	0	0.421146	0.0943469	0.0943469	0.579345	1.91798	0.579345
FBgn0032178	Spn31A	_6	0	0	0	0	0	0	0	0	0	0	3.13811	0
FBgn0032456	MRP	_6	0.333402	1.83022	0.333402	0.924934	2.41991	0.924934	0	1.26935	0	0	1.3242	0
FBgn0032609	CG13280	_6	0.654675	1.81464	0.654675	0.749317	0.499399	0.499399	0	1.6164	0	0	2.58162	0
FBgn0032889	CG9331	_6	0.964481	1.24961	0.964481	1.13261	0.945126	0.945126	0	0.465386	0	0.881186	2.89557	0.881186
FBgn0032922	CG9249	_6	0	0.307652	0	0.512183	0	0	0	1.83078	0	0.278036	1.89786	0.278036
FBgn0032961	CG1416	_6	0	0.525986	0	0.761407	0.606464	0.606464	0.82342	0.891924	0.82342	0.66725	2.78551	0.66725
FBgn0033518	Prx2540-2	_6	0	0.48792	0	0	0.603868	0	0	1.96797	0	0.564369	1.29408	0.564369
FBgn0033728	Cpr49Ae	_6	0	0	0	1.47389	0.285999	0.285999	0	0.413799	0	0.656074	3.99435	0.656074
FBgn0033906	ReepB	_6	1.03857	1.95798	1.03857	1.20972	0.498787	0.498787	0.0730299	0.818906	0.0730299	0	2.47888	0
FBgn0033989	CG7639	_6	1.11759	0	0	0.668052	0	0	1.41973	3.01811	1.41973	0.0364968	4.62008	0.0364968
FBgn0034030	CG8192	_6	0	0	0	0	0	0	0	2.24654	0	0	2.83466	0
FBgn0034033	CG8204	_6	0.0970654	0	0	0	0	0	0	0	0	0	1.61832	0
FBgn0034215	Mtap	_6	0.685045	0.448396	0.448396	0.715663	0.00440482	0.00440482	0	0	0	0.0173038	1.46481	0.0173038
FBgn0034362	CG5323	_6	0.332335	0	0	0.19983	0	0	0	0	0	0	3.27367	0
FBgn0034577	cpa	_6	0	0.0883121	0	1.93042	1.1233	1.1233	0.606904	0.640107	0.606904	0	1.39995	0
FBgn0034618	CG9485	_6	0.235345	0.835786	0.235345	0.629535	0.161557	0.161557	1.23468	0.783004	0.783004	0.352993	1.8462	0.352993
FBgn0034688	CG11474	_6	0.802989	0	0	0.637131	1.55067	0.637131	1.48138	1.05187	1.05187	0.913425	2.98875	0.913425
FBgn0034708	Vps35	_6	1.0164	0.774151	0.774151	0.73064	0.674434	0.674434	0.18817	0	0	0.0542445	1.69646	0.0542445
FBgn0034713	CG11291	_6	0	1.88391	0	0	0	0	0.402681	0	0	0	1.82036	0
FBgn0034792	YME1L	_6	0	0.284548	0	0.182594	0.387224	0.182594	0.452656	0	0	0.456938	1.94523	0.456938
FBgn0034793	asrij	_6	3.30636	0	0	0	0	0	0	1.71029	0	0.0331403	3.39469	0.0331403
FBgn0034968	RpL12	_6	1.75361	1.31566	1.31566	0.358132	0.381472	0.358132	0	0.201637	0	0.589728	2.07652	0.589728
FBgn0035016	CG4612	_6	0	0	0	0	0	0	0.639789	0.811898	0.639789	0	1.25639	0
FBgn0035060	Eps-15	_6	0.339918	0.334922	0.334922	0	0.484935	0	0.491365	1.93964	0.491365	0	2.21106	0
FBgn0035512	Cpr64Ac	_6	0.200468	0.100516	0.100516	0	0	0	0.0230266	2.39315	0.0230266	0	1.97992	0
FBgn0035632	Ppat-Dpck	_6	0	0.071933	0	0.727729	1.32384	0.727729	0.917806	0.0960461	0.0960461	0.274888	2.79916	0.274888
FBgn0035638	Tektin-C	_6	0.0800702	0	0	0	0	0	0	0	0	0	2.47847	0
FBgn0036044	Zasp67	_6	0.245146	0.227344	0.227344	0	0	0	0	0.00301368	0	0	4.49643	0
FBgn0036590	CG13065	_6	0	0.27255	0	0	0	0	0.361586	0	0	0.682686	2.55607	0.682686
FBgn0036655	CG13031	_6	0	0.344557	0	0	0	0	0	1.92236	0	0	1.4704	0
FBgn0036759	CG5577	_6	0	3.18475	0	0	0	0	0.600613	0	0	0	3.44019	0
FBgn0036760	CG5567	_6	0	3.67783	0	0	0	0	2.02334	0	0	0	2.90616	0
FBgn0036787	CG4306	_6	1.26006	1.57878	1.26006	0.235143	0.0492189	0.0492189	0	0.259046	0	0	1.11652	0
FBgn0036935	CG14186	_6	1.1866	0	0	0	0	0	0	1.28805	0	0	4.73338	0
FBgn0037138	P5CDh1	_6	0.472081	0	0	0.450906	0	0	2.66192	0	0	0.787931	1.82285	0.787931
FBgn0037633	CG9839	_6	1.98066	0.383325	0.383325	0	0	0	0	0	0	0	2.75266	0
FBgn0037637	IscU	_6	0.0747249	0	0	0.905402	0.749478	0.749478	0.18753	0.621088	0.18753	0	2.66593	0
FBgn0037744	CG8417	_6	1.22657	1.4698	1.22657	0.175437	0	0	0.117926	0.446292	0.117926	0.082392	0.840686	0.082392
FBgn0037756	CG8507	_6	0.820533	0	0	0	0	0	1.79756	0.707172	0.707172	0.158425	1.24246	0.158425
FBgn0037890	CG17734	_6	0	0	0	0	0.831989	0	1.62397	0	0	0	2.37153	0
FBgn0037995	CG3809	_6	0.90951	1.27682	0.90951	0	1.12369	0	0.973224	0	0	0	1.78521	0
FBgn0038088	CG10126	_6	0	0.749592	0	0	0	0	0.351226	0.156308	0.156308	0.322606	2.69123	0.322606
FBgn0038294	Mf	_6	1.18941	0.448643	0.448643	0.70685	1.29178	0.70685	2.55084	1.18197	1.18197	0.577167	4.83807	0.577167
FBgn0038511	cysu	_6	0	0	0	0	0	0	0	0	0	0	1.54443	0
FBgn0038535	alt	_6	0	0	0	0	0	0	1.42805	0.928223	0.928223	0	3.2559	0
FBgn0038570	Prx5	_6	1.21242	0.155145	0.155145	0.436278	0.347921	0.347921	0	1.847	0	0.0425993	2.6707	0.0425993
FBgn0038610	CG7675	_6	0.521685	0.0025169	0.0025169	0	0	0	0	2.00068	0	0	3.82537	0
FBgn0038714	Cpr92A	_6	0	0	0	0	0	0	0	0	0	0	1.44486	0
FBgn0038819	Cpr92F	_6	0.296161	0.541615	0.296161	0	0	0	1.0056	1.45447	1.0056	0.181825	1.88263	0.181825
FBgn0038842	hdly	_6	0.230989	0.771355	0.230989	0	0.029946	0	1.98322	0.0322574	0.0322574	0	2.29008	0
FBgn0039112	SdhD	_6	0.6221	0.307759	0.307759	0.699483	0.407454	0.407454	0.362866	1.52121	0.362866	0.227346	2.05601	0.227346
FBgn0039217	CG13627	_6	0	0	0	0	0.120916	0	0.440018	1.72891	0.440018	0.43487	1.63629	0.43487
FBgn0039698	CG7789	_6	0	0	0	0	0	0	0	0	0	0	1.95547	0
FBgn0039719	CG15515	_6	0	0	0	0.333678	0	0	0	0.953309	0	0.641581	3.9577	0.641581
FBgn0039737	CG7920	_6	0.725531	0.62536	0.62536	0.429893	0	0	0.497296	0.157611	0.157611	0.632086	2.77229	0.632086
FBgn0039897	CG1674	_6	0.600834	2.33103	0.600834	0	0	0	3.39793	0	0	0.854188	2.12441	0.854188
FBgn0039941	CG17167	_6	0	0	0	1.39382	0.86605	0.86605	0.292532	0.414752	0.292532	0	1.22795	0
FBgn0040377	Vha36-3	_6	0.289378	0.882618	0.289378	0	0.146194	0	0.0376626	0.164411	0.0376626	0	1.67386	0
FBgn0040650	CG15456	_6	0	0	0	0	0	0	2.42582	0.525622	0.525622	0	2.44039	0
FBgn0040773	COX7C	_6	0.339034	1.26809	0.339034	0.029401	0.556032	0.029401	1.41142	0	0	0.759823	2.35994	0.759823
FBgn0040985	CG6115	_6	2.76	0.781923	0.781923	0	0	0	0	0	0	0	3.66226	0
FBgn0041150	hoe1	_6	0	2.22269	0	0	0	0	1.48769	0	0	0	1.84583	0
FBgn0041581	AttB	_6	0	0	0	0	0	0	0	0	0	0.0345812	8.1395	0.0345812
FBgn0042206	GstD10	_6	0	1.56163	0	0.601019	0	0	0	1.84193	0	0.377728	2.48958	0.377728
FBgn0043070	MESK2	_6	0.559832	0	0	0.27092	0.988387	0.27092	0.862676	0.473772	0.473772	0.392249	1.26754	0.392249
FBgn0043578	PGRP-SB1	_6	1.9125	0.683412	0.683412	0	0	0	0.571597	0	0	1.28754	2.79444	1.28754
FBgn0050404	Tango11	_6	0	0.616171	0	0	0	0	2.95607	0	0	0	3.20981	0
FBgn0050493	CG30493	_6	0	0	0	1.05283	0	0	1.10859	0.533395	0.533395	1.23412	2.91736	1.23412
FBgn0052068	Adi1	_6	0.0276775	0.16383	0.0276775	0	2.35627	0	0	1.82804	0	0	2.54435	0
FBgn0052190	NUCB1	_6	0.955965	0.460289	0.460289	0.689519	0.544119	0.544119	3.30124	0.693247	0.693247	0	3.03792	0
FBgn0052487	CG32487	_6	0	1.88391	0	0	0	0	0.402681	0	0	0	1.82036	0
FBgn0052488	CG32488	_6	0	1.88391	0	0	0	0	0.402681	0	0	0	1.82036	0
FBgn0052528	parvin	_6	0	0.585472	0	0	0.422324	0	0	0	0	0.418607	2.1623	0.418607
FBgn0052654	Sec16	_6	0.449617	0	0	0.625375	0	0	1.30836	0	0	0.272103	1.66489	0.272103
FBgn0053092	P5CDh2	_6	0.150375	0	0	0.104811	0	0	1.84627	0	0	0.427878	1.28117	0.427878
FBgn0053303	CG33303	_6	0.474846	0.342377	0.342377	0.551506	0	0	2.32355	0	0	0.421189	1.76496	0.421189
FBgn0061515	endos	_6	0	0	0	0	0	0	0.894911	0.921302	0.894911	0.90163	1.4887	0.90163
FBgn0067864	Patj	_6	0	0	0	0	0	0	0.207269	0	0	0	1.74343	0
FBgn0083968	CG34132	_6	0	0	0	0.206956	0	0	0.973741	0.0295122	0.0295122	0	2.6185	0
FBgn0085440	Lgr4	_6	0.304875	2.06719	0.304875	0	0	0	0	0	0	0	4.06275	0
FBgn0250848	26-29-p	_6	0	0	0	0	1.31728	0	0	0	0	0.162936	3.12707	0.162936
FBgn0250871	pot	_6	0.0170083	0	0	0	0	0	0	0	0	0.142262	1.84377	0.142262
FBgn0250874	ttm50	_6	0.358682	1.63548	0.358682	1.15393	0.616606	0.616606	1.40135	0.0481606	0.0481606	0.546752	1.90699	0.546752
FBgn0259243	Pka-R1	_6	0.38353	0	0	1.74641	1.93927	1.74641	0.917029	0.122174	0.122174	0	3.98358	0
FBgn0260856	Membrin	_6	0.956333	0	0	0	0	0	3.0599	0	0	0	1.41779	0
FBgn0260857	Bet1	_6	0.704616	0	0	0	0	0	2.16464	0	0	0	1.99363	0
FBgn0261067	LSm1	_6	1.03457	0.610709	0.610709	1.09267	1.43848	1.09267	1.17427	0	0	0	1.51122	0
FBgn0261261	plx	_6	0.0272076	0	0	0	0	0	0.00877095	0.195666	0.00877095	0.501139	2.22506	0.501139
FBgn0261458	capt	_6	0.600095	0.291037	0.291037	1.49351	0.138741	0.138741	1.53385	1.37931	1.37931	0.400984	4.43393	0.400984
FBgn0261797	Dhc64C	_6	0	0.994147	0	0.444382	0	0	1.5628	0	0	0	1.35047	0
FBgn0262483	Rbp	_6	0	0	0	0	0	0	1.3772	1.35899	1.35899	0	1.13522	0
FBgn0262599	SmydA-3	_6	0	0	0	0	0	0	0	0	0	0	2.18736	0
FBgn0263133	mEFG1	_6	0.523311	0	0	0.406599	0.560288	0.406599	2.31656	1.15093	1.15093	0.966638	2.68572	0.966638
FBgn0263289	scrib	_6	0.936837	0	0	0.596314	1.61669	0.596314	0.786694	0.553496	0.553496	0.179961	1.65783	0.179961
FBgn0263593	Lpin	_6	0.0710727	1.22087	0.0710727	0	0	0	1.35388	0	0	0.185164	1.86531	0.185164
FBgn0264491	how	_6	0.657099	0	0	0	0	0	0	0.235003	0	0.0687377	2.634	0.0687377
FBgn0264922	smt3	_6	0.717427	0.326205	0.326205	0.483545	0.125984	0.125984	0.520782	1.38138	0.520782	0.775887	2.20716	0.775887
FBgn0265045	Strn-Mlck	_6	0	0.454013	0	0.279135	1.9448	0.279135	0.18859	1.45196	0.18859	0.0324462	2.15544	0.0324462
FBgn0000042	Act5C	_3	1.11176	0.673382	0.673382	3.53294	0.562972	0.562972	1.69935	1.39458	1.39458	3.03641	1.91804	1.91804
FBgn0000043	Act42A	_3	0.383793	0.94435	0.383793	1.30851	0.942578	0.942578	2.25742	1.09463	1.09463	1.17963	1.31649	1.17963
FBgn0000044	Act57B	_3	1.00455	0.364733	0.364733	1.76689	0.687306	0.687306	1.14635	3.40013	1.14635	1.73197	1.87565	1.73197
FBgn0000046	Act87E	_3	0.82547	0.844681	0.82547	3.53016	1.17699	1.17699	1.30716	2.34688	1.30716	2.10307	1.39656	1.39656
FBgn0000047	Act88F	_3	0.633686	0.694794	0.633686	2.18749	0.403821	0.403821	1.49688	0.95908	0.95908	1.39058	1.74756	1.39058
FBgn0000083	AnxB9	_3	0	0.827177	0	0	0	0	1.80698	0.259378	0.259378	2.11428	3.78585	2.11428
FBgn0000259	CkIIbeta	_3	0	0	0	2.07324	1.71721	1.71721	2.03774	0.533828	0.533828	3.14394	0.831762	0.831762
FBgn0000303	ChAT	_3	0	0	0	0	0	0	1.20222	0	0	0.738469	0.938533	0.738469
FBgn0000308	chic	_3	1.35964	0.35985	0.35985	2.57066	1.19327	1.19327	1.87423	0.928102	0.928102	3.01277	2.08974	2.08974
FBgn0000319	Chc	_3	0.608126	0.989432	0.608126	0.476042	0.659864	0.476042	4.05372	1.71737	1.71737	2.40971	0.237444	0.237444
FBgn0000355	Cp15	_3	0	0	0	0	0	0	0	1.8813	0	3.8908	0.946586	0.946586
FBgn0000358	Cp19	_3	0	0.46819	0	0.54345	0	0	0	2.57382	0	3.08368	1.21332	1.21332
FBgn0000359	Cp36	_3	0	0.0251814	0	0	0	0	0	0	0	1.52928	1.1745	1.1745
FBgn0000360	Cp38	_3	0	0.263244	0	0	0	0	0	0	0	2.00014	0	0
FBgn0000422	Ddc	_3	2.54187	0.766577	0.766577	0	0.775576	0	0.0574654	1.46422	0.0574654	5.76087	0	0
FBgn0000454	Dip-B	_3	0	0.586633	0	0	0.738532	0	1.36583	0	0	2.65779	1.19326	1.19326
FBgn0000557	eEF1alpha2	_3	1.96852	0.861528	0.861528	0.771139	0.495069	0.495069	0.833585	1.08441	0.833585	4.33369	1.71584	1.71584
FBgn0000559	eEF2	_3	1.35087	0.603315	0.603315	0.634147	0.949378	0.634147	1.94388	0.822485	0.822485	2.11906	1.01521	1.01521
FBgn0000579	Eno	_3	1.80872	0.607066	0.607066	0.63816	1.3927	0.63816	0.991387	2.2178	0.991387	1.31329	1.00834	1.00834
FBgn0000667	Actn	_3	0.999369	1.41417	0.999369	0.539449	1.68834	0.539449	2.18116	1.05664	1.05664	2.23607	1.03275	1.03275
FBgn0001092	Gapdh2	_3	1.73689	0.490207	0.490207	0.705794	1.74051	0.705794	0.998956	1.70653	0.998956	1.18408	1.18132	1.18132
FBgn0001098	Gdh	_3	1.25971	3.22458	1.25971	1.16184	0.2341	0.2341	1.34883	1.58175	1.34883	1.06129	2.00077	1.06129
FBgn0001125	Got2	_3	0.386684	2.13663	0.386684	0.980112	0.64197	0.64197	3.21159	0.449278	0.449278	2.05308	0.520282	0.520282
FBgn0001202	hook	_3	0	0	0	0	0	0	0.155235	0	0	2.31849	1.32953	1.32953
FBgn0001218	Hsc70-3	_3	0.5562	0.153716	0.153716	0.061002	1.32649	0.061002	1.33802	1.00985	1.00985	1.99851	0	0
FBgn0001220	Hsc70-5	_3	1.49787	0.00410859	0.00410859	1.43104	0.0386563	0.0386563	0.179436	2.23416	0.179436	5.77522	1.38169	1.38169
FBgn0001225	Hsp26	_3	0	1.62193	0	0.734229	2.11321	0.734229	0.492346	0.553353	0.492346	6.31188	0.86805	0.86805
FBgn0001258	Ldh	_3	3.36455	0.349402	0.349402	2.0018	0.999785	0.999785	0.254473	0.795604	0.254473	1.97996	0.763021	0.763021
FBgn0001961	Arpc1	_3	1.09589	0.535917	0.535917	1.21467	0.623766	0.623766	0.409712	0.636255	0.409712	0.685359	1.40466	0.685359
FBgn0002069	AspRS	_3	1.52035	1.43385	1.43385	1.16889	1.10086	1.10086	0.819461	0.123235	0.123235	2.42042	0.57546	0.57546
FBgn0002121	l(2)gl	_3	1.21695	0.0116404	0.0116404	0.686421	0.212524	0.212524	0.95141	0.341488	0.341488	2.20669	0.27397	0.27397
FBgn0002174	l(2)tid	_3	0.416619	0	0	0.384301	0	0	0	1.52872	0	1.99635	0.720957	0.720957
FBgn0002780	mod	_3	0	0.134302	0	0	0.642599	0	0	0.468915	0	2.81057	0.24186	0.24186
FBgn0002787	Rpn8	_3	0.789766	1.07744	0.789766	1.671	0.64359	0.64359	0.304591	1.57532	0.304591	1.75975	1.08544	1.08544
FBgn0002842	sa	_3	0.362861	0.220831	0.220831	0	0	0	0	0	0	3.95296	0	0
FBgn0003062	Fib	_3	1.52395	0.554903	0.554903	1.73278	0.558065	0.558065	0.0307306	0.746655	0.0307306	0.989216	1.31264	0.989216
[truncated: 2,762 more rows]
