# Supplementary material for: Tissue-specific modulation of gene expression in response to lowered insulin signalling in Drosophila
Source: eLife. 2021 Apr 21;10:e67275. doi: 10.7554/eLife.67275 (PMC8060030; doi:10.7554/eLife.67275)
Supplement: Supplementary file 8. — Columns listed as: Cluster (Relates to Figure 2), Terms in Cluster (GO Terms significantly Enriched in a specific cluster), GO ID, Term, Ontology (BP, MF, CC), Annoatated (#genes annotated with the term in the tissue-specific background), Significant (#genes significant annotated with the term in the tissue-specific background), Expected (expected # of significant genes with the term in the tissue-specific background), Enrichment (Enrichment of the observed over the expected number of significant genes), Log2 of Enrichment, Fisher (p-value of enrichment), Primary Fisher adj (adjusted p-value of enrichment), Genes (Names of significant genes annotated with the term), Genes in secondary. [file elife-67275-supp8.xlsx]

## Sheet: Sheet1
cluster	Terms.in.cluster	GO.ID	Term	Ontology	Annotated	Significant	Expected	Enrichment	log2Enrichment	Fisher	Primary.Fisher.adj	Genes	Genes.in.secondary
cluster_1	6	GO:0006120	mitochondrial electron transport, NADH to ubiquinone	BP	25	18	0.94	19.03	4.2	3.5e-21	1.8e-20	ND-ACP, ND-SGDH, ND-42, ND-PDSW, ND-B14.5A, ND-B16.6, ND-ASHI, ND-B18, ND-24, ND-B17.2, ND-B14.5B, ND-51, ND-B14, ND-B12, ND-19, ND-39, ND-49, ND-MLRQ	ND-75, ND-B14.7, ND-30, CG7430
cluster_1	3	GO:0045261	proton-transporting ATP synthase complex, catalytic core F(1)	CC	7	5	0.26	18.9	4.2	1.4e-06	3.7e-06	ATPsynbeta, blw, ATPsynCF6, ATPsyngamma, ATPsyndelta
cluster_1	2	GO:0022625	cytosolic large ribosomal subunit	CC	50	35	1.89	18.51	4.2	4.4e-40	7.9e-39	RpLP0, RpL36, RpLP1, RpL19, RpL32, RpLP2, RpL4, RpL7, RpL23, RpL18A, RpL13, RpL11, RpL22, RpL29, RpL14, RpL3, RpL31, RpL23A, RpL35, RpL37a, RpL24, RpL21, RpL28, RpL18, RpL10Ab, RpL26, RpL35A, RpL13A, RpL27, RpL34a, RpL6, RpL38, RpL30, RpL8, RpL27A
cluster_1	7	GO:0022626	cytosolic ribosome	CC	90	60	3.4	17.63	4.1	4.8e-68	3.5e-66	RpLP0, RpL36, RpS5a, RpLP1, RpL19, RpS3, RpL32, RpLP2, RpL4, sta, RpS27A, RpS14a, RpS2, RpS17, RpL7, RpL23, RpS15Aa, RpS13, RpS9, RpL18A, RpS18, RpL13, RpS4, RpL11, RpL22, RpL29, RpS3A, RpL14, RpS20, RpL3, RpL31, RpL23A, RpS10a, RpL35, RpL37a, RpL24, RpL21, RpS23, RpS15, RpL28, RpL18, RpL10Ab, RpL26, RpL35A, RpL13A, RpS30, RpL27, RpL34a, RpS8, RpS7, RpL6, RpL38, RpS25, RpL30, RpS12, RpS10b, RpS24…	eIF4E1, Act79B, Mhc
cluster_1	2	GO:0022627	cytosolic small ribosomal subunit	CC	40	25	1.51	16.56	4	9.6e-27	6.7e-26	RpS5a, RpS3, sta, RpS27A, RpS14a, RpS2, RpS17, RpS15Aa, RpS13, RpS9, RpS18, RpS4, RpS3A, RpS20, RpS10a, RpS23, RpS15, RpS30, RpS8, RpS7, RpS25, RpS12, RpS10b, RpS24, RpS26
cluster_1	3	GO:0050136	NADH dehydrogenase (quinone) activity	MF	26	16	0.98	16.34	4	3e-17	1.4e-16	ND-SGDH, ND-75, ND-42, ND-PDSW, ND-B14.5A, ND-ASHI, ND-B18, ND-24, ND-B17.2, ND-B14.5B, ND-51, ND-B14, ND-19, ND-39, ND-49, ND-30
cluster_1	1	GO:0005852	eukaryotic translation initiation factor 3 complex	CC	15	9	0.57	15.89	4	5.1e-10	1.5e-09	eIF3i, eIF3h, eIF3e, eIF3j, eIF3g1, eIF3b, eIF3c, eIF3f1, eIF3d1
cluster_1	34	GO:0046933	proton-transporting ATP synthase activity, rotational mechanism	MF	12	7	0.45	15.45	4	6.5e-08	1.7e-07	ATPsynbeta, ATPsynG, blw, ATPsynD, ATPsynB, ATPsyngamma, ATPsyndelta	ATPsynCF6, Cam, Tsf1, ATPsynF
cluster_1	8	GO:0042775	mitochondrial ATP synthesis coupled electron transport	BP	54	28	2.04	13.74	3.8	1e-26	6.7e-26	ND-ACP, ND-SGDH, mt:Cyt-b, cype, COX5A, ND-42, RFeSP, ND-PDSW, ND-B14.5A, ND-B16.6, ND-ASHI, ND-B18, UQCR-14, ND-24, ND-B17.2, ND-B14.5B, ND-51, COX4, ND-B14, ND-B12, levy, ND-19, Cyt-c1, ND-39, ND-49, COX7A, ND-MLRQ, UQCR-C2	ND-75, blw, ND-B14.7, ND-30
cluster_1	3	GO:0045263	proton-transporting ATP synthase complex, coupling factor F(o)	CC	10	5	0.38	13.27	3.7	1.6e-05	3.7e-05	ATPsynG, ATPsynCF6, ATPsynD, ATPsynB, ATPsynF
cluster_1	8	GO:0006123	mitochondrial electron transport, cytochrome c to oxygen	BP	11	5	0.42	12.04	3.6	2.8e-05	6e-05	cype, COX5A, COX4, levy, COX7A	mt:Cyt-b, ND-75, ND-B17.2, Cyt-c1
cluster_1	6	GO:0045275	respiratory chain complex III	CC	11	5	0.42	12.04	3.6	2.8e-05	6e-05	mt:Cyt-b, RFeSP, UQCR-14, Cyt-c1, UQCR-C2	cype, COX5A, COX4, levy, COX7A
cluster_1	2	GO:1990204	oxidoreductase complex	CC	62	27	2.34	11.55	3.5	3.6e-23	2e-22	ND-SGDH, mt:Cyt-b, ND-75, ND-42, RFeSP, ND-PDSW, ND-B14.5A, ND-B16.6, ND-ASHI, ND-B18, UQCR-14, ND-24, ND-B17.2, ND-B14.5B, ND-51, ND-B14, ND-B14.7, ND-B12, ND-19, Cyt-c1, CG7430, ND-39, CG5214, ND-49, ND-MLRQ, UQCR-C2, ND-30	Rpt2, Rpt5, Rpn6, Prosalpha1
cluster_1	6	GO:0051298	centrosome duplication	BP	57	23	2.15	10.7	3.4	6.6e-19	3.2e-18	Cam, RpL19, RpL4, RpL7, RpL18A, RpL13, RpS4, RpL11, RpL14, RpL3, RpL23A, RpL35, RpL24, RpL21, RpS23, RpL28, RpL10Ab, RpL13A, RpL27, RpL6, RpL30, RpL8, RpL27A	eIF4A, 14-3-3zeta, Act79B, Mhc
cluster_1	10	GO:0098800	inner mitochondrial membrane protein complex	CC	97	39	3.66	10.63	3.4	8.5e-32	1e-30	ATPsynbeta, ATPsynG, blw, ND-SGDH, mt:Cyt-b, cype, ATPsynCF6, ATPsynD, ND-75, COX5A, ATPsynB, ND-42, ATPsyngamma, RFeSP, ND-PDSW, ND-B14.5A, ATPsyndelta, ND-B16.6, ND-ASHI, ND-B18, UQCR-14, ND-24, ND-B17.2, ND-B14.5B, ND-51, COX4, ND-B14, ND-B14.7, ND-B12, levy, ATPsynF, ND-19, Cyt-c1, ND-39, ND-49, COX7A, ND-MLRQ, UQCR-C2, ND-30	l(2)37Cc, CG7470, 14-3-3zeta
cluster_1	10	GO:0046034	ATP metabolic process	BP	99	38	3.74	10.2	3.4	4.6e-30	3.7e-29	Gapdh1, ATPsynbeta, ATPsynG, blw, ND-ACP, ND-SGDH, mt:Cyt-b, cype, ATPsynCF6, ATPsynD, ND-75, COX5A, ATPsynB, ND-42, ATPsyngamma, RFeSP, ND-PDSW, ND-B14.5A, ATPsyndelta, ND-B16.6, ND-ASHI, ND-B18, UQCR-14, ND-24, ND-B17.2, ND-B14.5B, ND-51, COX4, ND-B14, ND-B12, levy, ND-19, Cyt-c1, ND-39, ND-49, COX7A, ND-MLRQ, UQCR-C2
cluster_1	2	GO:0098798	mitochondrial protein complex	CC	114	42	4.3	9.78	3.3	2e-32	2.9e-31	ATPsynbeta, ATPsynG, blw, ND-SGDH, mt:Cyt-b, cype, ATPsynCF6, ATPsynD, ND-75, COX5A, ATPsynB, ND-42, ATPsyngamma, RFeSP, ND-PDSW, ND-B14.5A, ATPsyndelta, Mtpalpha, ND-B16.6, ND-ASHI, ND-B18, UQCR-14, ND-24, ND-B17.2, ND-B14.5B, ND-51, COX4, ND-B14, ND-B14.7, ND-B12, levy, ATPsynF, ND-19, Cyt-c1, CG7430, ND-39, CG5214, ND-49, COX7A, ND-MLRQ, UQCR-C2, ND-30	l(2)37Cc, CG7470, Mdh2
cluster_1	13	GO:0009127	purine nucleoside monophosphate biosynthetic process	BP	27	10	1.02	9.78	3.3	2.1e-08	6.2e-08	Gart, ATPsynbeta, ATPsynG, blw, ATPsynCF6, ATPsynD, ATPsynB, ATPsyngamma, Paics, ATPsyndelta	AdSL, CG11089
cluster_1	16	GO:0009126	purine nucleoside monophosphate metabolic process	BP	110	40	4.15	9.65	3.3	1.4e-30	1.3e-29	Gart, Gapdh1, ATPsynbeta, ATPsynG, blw, ND-ACP, ND-SGDH, mt:Cyt-b, cype, ATPsynCF6, ATPsynD, ND-75, COX5A, ATPsynB, ND-42, ATPsyngamma, Paics, RFeSP, ND-PDSW, ND-B14.5A, ATPsyndelta, ND-B16.6, ND-ASHI, ND-B18, UQCR-14, ND-24, ND-B17.2, ND-B14.5B, ND-51, COX4, ND-B14, ND-B12, levy, ND-19, Cyt-c1, ND-39, ND-49, COX7A, ND-MLRQ, UQCR-C2	AdSL, CG11089, Cam, 14-3-3zeta
cluster_1	3	GO:0045333	cellular respiration	BP	89	32	3.36	9.51	3.2	3.1e-24	1.9e-23	ND-ACP, ND-SGDH, mt:Cyt-b, cype, ND-75, COX5A, ND-42, RFeSP, ND-PDSW, ND-B14.5A, ND-B16.6, ND-ASHI, ND-B18, UQCR-14, ND-24, ND-B17.2, ND-B14.5B, ND-51, COX4, ND-B14, ND-B12, levy, ND-19, Cyt-c1, CG7430, ND-39, CG5214, ND-49, COX7A, ND-MLRQ, UQCR-C2, Mdh2	Gapdh1, blw
cluster_1	3	GO:0003743	translation initiation factor activity	MF	49	17	1.85	9.19	3.2	6.2e-13	2.5e-12	eIF4A, eIF2beta, eIF4E1, eIF3i, eIF3h, eIF4G1, eIF3e, eIF5B, eIF3j, eIF3g1, eIF5, eIF3b, eIF3c, eIF3f1, eIF3d1, eIF2alpha, eIF4H1	RpS18, eEF1gamma
cluster_1	7	GO:0015078	proton transmembrane transporter activity	MF	60	17	2.26	7.52	2.9	2.6e-11	8.1e-11	ATPsynbeta, ATPsynG, blw, mt:Cyt-b, cype, ATPsynCF6, ATPsynD, COX5A, ATPsynB, ATPsyngamma, RFeSP, ATPsyndelta, UQCR-14, COX4, levy, COX7A, UQCR-C2	Tsf1
cluster_1	5	GO:0006412	translation	BP	289	79	10.91	7.26	2.9	1.1e-52	4.1e-51	RpLP0, eIF4A, RpL36, RpS5a, RpLP1, RpL19, RpS3, RpL32, RpLP2, RpL4, sta, RpS27A, RpS14a, RpS2, eIF2beta, RpS17, RpL7, RpL23, RpS15Aa, RpS13, RpS9, RpL18A, RpS18, RpL13, RpS4, RpL11, eIF4E1, RpL22, eIF3i, RpL29, RpS3A, RpL14, RpS20, RpL3, eIF3h, eIF4G1, RpL31, eIF3e, eIF5B, RpL23A, RpS10a, eIF3j, eEF1gamma, eIF3g1, RpL35, RpL37a, eIF5, RpL24, RpL21, RpS23, RpS15, eIF3b, eIF3c, RpL28, RpL18, RpL10A…	CG7430
cluster_1	1	GO:0005829	cytosol	CC	327	81	12.34	6.54	2.7	1.7e-50	4e-49	Gart, RpLP0, Cam, eIF4A, RpL36, RpS5a, RpLP1, RpL19, RpS3, RpL32, RpLP2, RpL4, sta, RpS27A, RpS14a, RpS2, eIF2beta, RpS17, RpL7, RpL23, RpS15Aa, RpS13, RpS9, RpL18A, RpS18, RpL13, RpS4, RpL11, eIF4E1, RpL22, eIF3i, RpL29, RpS3A, RpL14, RpS20, Paics, RpL3, scu, eIF3h, eIF4G1, RpL31, eIF3e, eIF5B, RpL23A, RpS10a, eEF1gamma, RpL35, RpL37a, eIF5, RpL24, RpL21, RpS23, RpS15, eIF3b, eIF3c, RpL28, RpL18…
cluster_1	1	GO:1990904	ribonucleoprotein complex	CC	350	65	13.21	4.92	2.3	6.5e-31	6.7e-30	RpLP0, eIF4A, RpL36, RpS5a, RpLP1, RpL19, RpS3, RpL32, RpLP2, RpL4, sta, RpS27A, RpS14a, RpS2, RpS17, RpL7, RpL23, RpS15Aa, RpS13, RpS9, RpL18A, RpS18, SsRbeta, RpL13, RpS4, RpL11, eIF4E1, RpL22, RpL29, RpS3A, RpL14, RpS20, RpL3, yps, RpL31, RpL23A, RpS10a, RpL35, RpL37a, RpL24, RpL21, RpS23, RpS15, RpL28, RpL18, RpL10Ab, RpL26, RpL35A, RpL13A, RpS30, RpL27, RpL34a, RpS8, RpS7, RpL6, RpL38, RpS25…
cluster_1	1	GO:0005811	lipid droplet	CC	170	29	6.42	4.53	2.2	2.1e-12	7.2e-12	Gapdh1, l(2)37Cc, ATPsynbeta, ATPsynG, SsRbeta, blw, cype, ATPsynD, COX5A, ATPsynB, ND-42, ATPsyngamma, scu, ATPsyndelta, Mtpalpha, eEF1gamma, COX4, CG8839, levy, ATPsynF, Cyt-c1, CG7430, CG7470, CG5214, Lsd-1, CG5112, UQCR-C2, Mdh2, bel
cluster_1	2	GO:0016616	oxidoreductase activity, acting on the CH-OH group of donors, NAD or NADP as acceptor	MF	37	6	1.4	4.29	2.1	0.0023	0.0046	scu, Sodh-2, Sodh-1, Mtpalpha, CG6287, Mdh2	CG7322
cluster_1	1	GO:0005739	mitochondrion	CC	392	51	14.79	3.46	1.8	1.7e-16	7.1e-16	l(2)37Cc, ATPsynbeta, ATPsynG, blw, ND-ACP, ND-SGDH, mt:Cyt-b, cype, ATPsynCF6, ATPsynD, ND-75, COX5A, ATPsynB, ND-42, ATPsyngamma, scu, RFeSP, ND-PDSW, ND-B14.5A, ATPsyndelta, Mtpalpha, Shmt, ND-B16.6, ND-ASHI, ND-B18, UQCR-14, ND-24, ND-B17.2, ND-B14.5B, ND-51, COX4, ND-B14, eIF3c, CG10924, ND-B14.7, ND-B12, levy, ATPsynF, ND-19, Cyt-c1, CG6512, CG7430, ND-39, CG7470, CG5214, ND-49, COX7A, ND-M…
cluster_1	1	GO:0055114	oxidation-reduction process	BP	329	41	12.42	3.29	1.7	1.6e-12	5.7e-12	Gapdh1, blw, ND-ACP, ND-SGDH, mt:Cyt-b, cype, ND-75, COX5A, ND-42, RFeSP, ND-PDSW, Sodh-2, Sodh-1, ND-B14.5A, Mtpalpha, ND-B16.6, ND-ASHI, ND-B18, UQCR-14, ND-24, ND-B17.2, ND-B14.5B, ND-51, CG6287, COX4, CG8665, ND-B14, ND-B12, levy, ND-19, Cyt-c1, CG7430, ND-39, CG7470, CG5214, ND-49, COX7A, ND-MLRQ, UQCR-C2, Mdh2, ND-30
cluster_1	4	GO:0005730	nucleolus	CC	81	10	3.06	3.27	1.7	0.00082	0.0017	RpL36, RpS5a, RpL32, RpS2, RpS13, RpS9, RpS18, RpL11, RpS15, RpL8	Mhc, Cam, RpS3
cluster_1	1	GO:0016491	oxidoreductase activity	MF	334	40	12.6	3.18	1.7	1.2e-11	3.8e-11	Gapdh1, ND-SGDH, mt:Cyt-b, cype, ND-75, COX5A, ND-42, scu, RFeSP, ND-PDSW, Sodh-2, Sodh-1, ND-B14.5A, Mtpalpha, ND-B16.6, ND-ASHI, ND-B18, UQCR-14, ND-24, CG7322, ND-B17.2, ND-B14.5B, ND-51, CG6287, COX4, CG8665, ND-B14, ND-B12, levy, ND-19, CG7430, ND-39, CG7470, ND-49, Trx-2, COX7A, ND-MLRQ, UQCR-C2, Mdh2, ND-30
cluster_1	16	GO:0048102	autophagic cell death	BP	54	6	2.04	2.95	1.6	0.015	0.028	Cam, eIF4E1, eEF1gamma, eIF3f1, Mdh2, bel	Paics, RpS3, RpL14, 14-3-3zeta, RpL13A, RpS8
cluster_1	1	GO:0016829	lyase activity	MF	54	6	2.04	2.95	1.6	0.015	0.028	RpLP0, RpS3, Paics, Mtpalpha, CG10924, AdSL
cluster_1	1	GO:0016310	phosphorylation	BP	314	33	11.85	2.79	1.5	3.2e-08	8.8e-08	Cam, Gapdh1, 14-3-3zeta, ND-ACP, ND-SGDH, mt:Cyt-b, cype, ATPsynD, ND-75, COX5A, ND-42, RFeSP, ND-PDSW, ND-B14.5A, ND-B16.6, ND-ASHI, ND-B18, UQCR-14, ND-24, ND-B17.2, ND-B14.5B, ND-51, COX4, ND-B14, ND-B12, levy, ND-19, Cyt-c1, ND-39, ND-49, COX7A, ND-MLRQ, UQCR-C2
cluster_1	1	GO:0044281	small molecule metabolic process	BP	534	54	20.15	2.68	1.4	1e-12	3.9e-12	Gart, Gapdh1, 14-3-3zeta, ATPsynbeta, ATPsynG, blw, ND-ACP, ND-SGDH, mt:Cyt-b, CG11899, cype, ATPsynCF6, ATPsynD, ND-75, COX5A, ATPsynB, ND-42, ATPsyngamma, Paics, scu, RFeSP, ND-PDSW, ND-B14.5A, ATPsyndelta, Mtpalpha, Shmt, ND-B16.6, ND-ASHI, ND-B18, UQCR-14, ND-24, ND-B17.2, ND-B14.5B, ND-51, COX4, CG8665, ND-B14, CG10924, ND-B12, levy, ND-19, Cyt-c1, CG7430, ND-39, CG7470, CG5214, AdSL, CG1108…
cluster_1	4	GO:0005875	microtubule associated complex	CC	252	24	9.51	2.53	1.3	1.8e-05	4.2e-05	Cam, eIF4A, l(2)37Cc, RpS3, sta, RpS27A, 14-3-3zeta, eIF2beta, SsRbeta, blw, eIF4E1, eIF3i, ATPsynD, scu, RFeSP, Mtpalpha, Rpn6, eEF1gamma, CG5214, UQCR-C2, RpS10b, eIF2alpha, eIF4H1, bel	Act79B, Mhc
cluster_1	1	GO:0003723	RNA binding	MF	343	31	12.94	2.39	1.3	2.7e-06	6.7e-06	eIF4A, RpS5a, RpS3, RpS2, eIF2beta, RpL7, RpS9, RpS18, RpS4, eIF4E1, eIF3i, RpS20, eIF3h, yps, eIF4G1, eIF3e, eIF5B, eIF3j, eEF1gamma, eIF3g1, CG14414, eIF5, RpS15, eIF3b, eIF3c, RpL10Ab, eIF3f1, eIF3d1, glo, eIF2alpha, eIF4H1
cluster_1	5	GO:0016887	ATPase activity	MF	179	15	6.75	2.22	1.2	0.0028	0.0054	eIF4A, ATPsynbeta, ATPsynG, blw, Rpt2, ATPsynCF6, ATPsynD, ATPsynB, ATPsyngamma, ATPsyndelta, Rpt5, ATPsynF, CG6512, bel, Mhc	eIF5B
cluster_1	2	GO:0022402	cell cycle process	BP	375	29	14.15	2.06	1	0.00012	0.00025	Cam, eIF4A, RpL19, RpS3, RpL4, RpL7, RpL18A, RpL13, RpS4, RpL11, eIF4E1, RpL14, RpL3, eIF4G1, RpL23A, eIF3g1, RpL35, RpL24, RpL21, RpS23, RpL28, RpL10Ab, RpL13A, RpL27, RpL6, RpL30, RpL8, RpL27A, bel	14-3-3zeta, COX5A, eIF3e, COX4
cluster_4	4	GO:0005832	chaperonin-containing T-complex	CC	7	6	0.14	41.64	5.4	4.3e-10	5.2e-09	CCT1, CCT5, CCT3, CCT6, CCT4, CCT7	Hsp83, Pfdn4
cluster_4	5	GO:0004558	alpha-1,4-glucosidase activity	MF	11	8	0.23	35.51	5.2	3.6e-12	8.1e-11	Mal-A2, Mal-A1, Mal-A3, Mal-B1, Mal-B2, Mal-A4, Mal-A7, Mal-A8	Gal, LManII, LManV, LManVI
cluster_4	7	GO:0001101	response to acid chemical	BP	13	5	0.27	18.77	4.2	3.7e-06	1.9e-05	Mdr49, Mdr65, Mdr50, RagC-D, CG10226	pdgy, ACC, Tom40, Rtnl1, GstE9
cluster_4	2	GO:0016877	ligase activity, forming carbon-sulfur bonds	MF	18	6	0.37	16.22	4	9.6e-07	5.8e-06	Scsalpha, pdgy, Sucb, CG9993, skap, CG6178	Gs2, PCB, ACC, AsnRS
cluster_4	7	GO:0004364	glutathione transferase activity	MF	38	12	0.78	15.35	3.9	4.5e-12	8.1e-11	GstE12, GstE13, GstE1, GstE11, GstE9, GstE8, GstE7, GstE6, GstE5, GstE4, GstE3, GstE10	mEFTs, AsnRS, Sam-S, pdgy, CG6178
cluster_4	4	GO:0008238	exopeptidase activity	MF	27	5	0.55	9	3.2	0.00018	0.0006	ApepP, CG8774, CG4572, CG32473, Psa	Prosalpha5, skap
cluster_4	2	GO:0042579	microbody	CC	55	5	1.13	4.44	2.2	0.005	0.012	Got1, CG11208, CG9149, CG6178, Mdh1
cluster_4	1	GO:0005975	carbohydrate metabolic process	BP	202	18	4.15	4.35	2.1	7.9e-08	7.1e-07	Gal, Mal-A2, Mal-A1, Mal-A3, PCB, LManII, Men-b, LManV, LManVI, Mal-B1, Mal-B2, ACC, Mal-A4, Mal-A7, Mal-A8, Mal-A5, Mdh1, Galk
cluster_4	6	GO:0042623	ATPase activity, coupled	MF	145	12	2.98	4.03	2	3.2e-05	0.00013	Hsp83, Rm62, Mdr49, Mdr65, Mdr50, CCT5, CCT3, Nlp, CCT6, CCT4, CG10226, CCT7	alphaTub84D, mahe, RagC-D, CG10077
cluster_4	6	GO:0015399	primary active transmembrane transporter activity	MF	76	6	1.56	3.84	1.9	0.0044	0.011	Mdr49, Mdr65, Mdr50, Tom40, mge, CG10226	Dic1, aralar1, CG8602, CG1213, CG5958
cluster_4	1	GO:0005811	lipid droplet	CC	170	13	3.49	3.73	1.9	3.4e-05	0.00013	Hsp83, alphaTub84D, CCT6, PCB, aralar1, Sucb, CG5958, CCT4, ACC, CG7834, Rtnl1, Mdh1, Cyt-b5
cluster_4	4	GO:0006631	fatty acid metabolic process	BP	66	5	1.36	3.68	1.9	0.011	0.024	pdgy, ACC, CG11208, CG9149, CG6178	PCB, Men-b
cluster_4	12	GO:0005524	ATP binding	MF	342	22	7.02	3.14	1.6	7.9e-07	5.7e-06	Hsp83, Rm62, CCT1, Mdr49, Mdr65, Sam-S, Mdr50, CCT5, CCT3, CCT6, PCB, Sucb, mahe, CCT4, ACC, CG10226, CG10077, CCT7, skap, AsnRS, Arp3, Galk	alphaTub84D, RagC-D
cluster_4	3	GO:0043436	oxoacid metabolic process	BP	190	11	3.9	2.83	1.5	0.0016	0.0043	Got1, Gs2, PCB, pdgy, Men-b, ACC, CG11208, CG9149, CG6178, AsnRS, Mdh1	Scsalpha, Sucb, skap
cluster_4	2	GO:0044430	cytoskeletal part	CC	370	17	7.6	2.23	1.2	0.0011	0.0034	Hsp83, Rm62, CCT1, Tm1, alphaTub84D, Tm2, up, CCT5, CCT3, CCT6, PCB, CCT4, CG10077, CCT7, skap, CG7834, Arp3
cluster_4	1	GO:0044281	small molecule metabolic process	BP	534	24	10.97	2.19	1.1	0.00012	0.00042	Gal, Got1, Gs2, Mal-A2, Mal-A1, Mal-A3, Scsalpha, Sam-S, PCB, pdgy, LManII, Sucb, Men-b, LManV, LManVI, ACC, CG11208, CG9149, skap, CG6178, CG7834, AsnRS, Mdh1, Galk
cluster_4	2	GO:0005875	microtubule associated complex	CC	252	11	5.18	2.13	1.1	0.013	0.028	Rm62, CCT1, CCT5, CCT3, CCT6, PCB, CCT4, CG10077, CCT7, skap, CG7834	Hsp83, alphaTub84D
cluster_8	5	GO:0071256	translocon complex	CC	6	5	0.27	18.25	4.2	1.1e-06	9.2e-06	Sec61beta, Tapdelta, CG5885, Sec61gamma, Sec61alpha	Desat1, GlyS, Gtp-bp
cluster_8	2	GO:0048500	signal recognition particle	CC	8	6	0.36	16.45	4	2.2e-07	2.6e-06	Srp54k, Tapdelta, CG5885, Srp9, Srp68, Srp72
cluster_8	12	GO:0045047	protein targeting to ER	BP	14	10	0.64	15.67	4	2.6e-11	1e-09	Gtp-bp, Sec61beta, Srp54k, CG5885, Sec61gamma, Srp9, Srp68, Srp72, TRAM, Sec61alpha	Sec13, Tapdelta, AP-1gamma
cluster_8	3	GO:0003995	acyl-CoA dehydrogenase activity	MF	13	8	0.59	13.45	3.8	1.7e-08	3.4e-07	CG9527, CG9547, CG17544, CG7461, Acox57D-d, CG12262, CG3902, Arc42	CG3699, su(r), wal, CG12338, AOX3
cluster_8	8	GO:0006635	fatty acid beta-oxidation	BP	21	8	0.96	8.34	3.1	2e-06	1.6e-05	Mfe2, CG9527, CG17544, CG6543, Acox57D-d, CG12262, yip2, CG3699	Idh
cluster_8	13	GO:0030660	Golgi-associated vesicle membrane	CC	14	5	0.64	7.84	3	0.00027	0.0017	betaCOP, beta'COP, epsilonCOP, gammaCOP, AP-1gamma	Sec13, Desat1, Mipp2, Mipp1
cluster_8	4	GO:0009063	cellular amino acid catabolic process	BP	15	5	0.68	7.31	2.9	0.00039	0.0023	ppl, CG9547, GstZ1, GstZ2, hgo	Faa, CG11796
cluster_8	3	GO:0046395	carboxylic acid catabolic process	BP	45	14	2.05	6.82	2.8	5.1e-09	1.2e-07	Idh, ppl, Mfe2, CG9527, CG9547, CG17544, CG6543, Acox57D-d, CG12262, GstZ1, GstZ2, yip2, hgo, CG3699	SCOT
cluster_8	3	GO:0005789	endoplasmic reticulum membrane	CC	43	13	1.96	6.63	2.7	2.7e-08	4e-07	Gtp-bp, Sec61beta, Stt3B, Tapdelta, CG5885, Spase25, Sec61gamma, OstDelta, Spase22-23, Sec61alpha, Baldspot, twr, Dad1	tobi
cluster_8	3	GO:0010883	regulation of lipid storage	BP	17	5	0.78	6.45	2.7	0.00074	0.004	ImpL2, betaCOP, Arf79F, beta'COP, gammaCOP	ScpX, Pmp70, cv-d
cluster_8	4	GO:0006631	fatty acid metabolic process	BP	66	16	3.01	5.31	2.4	2.2e-08	3.7e-07	Idh, Cyp6a8, CG10932, Mfe2, CG9527, CG17544, CG6543, Acox57D-d, CG12262, eloF, CG9458, yip2, CG3699, CG30008, Desat1, Baldspot	eas, Fad2, Aldh, Pdk, CG31075
cluster_8	2	GO:0042579	microbody	CC	55	12	2.51	4.79	2.3	4.5e-06	3.1e-05	Cat, Idh, ScpX, CG10932, Mfe2, Pmp70, CG9527, CG17597, CG17544, CG12338, Acox57D-d, CG18003
cluster_8	5	GO:0020037	heme binding	MF	62	13	2.83	4.59	2.2	2.9e-06	2.1e-05	Cat, Cyp6a2, Pxn, Cyp6a8, Cyp9b2, Cyp6g1, Cyp28d1, Cyp6w1, Cyp6a14, Cyp6d2, Cyp9f2, Cyp6d5, Cyp6a18	AOX3, wal, Fad2, Desat1
cluster_8	2	GO:0050662	coenzyme binding	MF	74	15	3.38	4.44	2.2	7.6e-07	7.5e-06	Idh, wal, CG9527, CG9547, CG17544, CG12338, CG15093, CG7461, Acox57D-d, CG12262, CG3902, AOX3, Arc42, Idh3b, CG31674	Eip55E, ATPCL, CG5618, CG18003
cluster_8	2	GO:0016485	protein processing	BP	25	5	1.14	4.38	2.1	0.0047	0.02	Spase25, ste24a, Spase22-23, twr, Spn42Da
cluster_8	1	GO:0016903	oxidoreductase activity, acting on the aldehyde or oxo group of donors	MF	25	5	1.14	4.38	2.1	0.0047	0.02	Aldh, CG8199, CG10097, AOX3, CG31075
cluster_8	2	GO:1901605	alpha-amino acid metabolic process	BP	48	9	2.19	4.11	2	0.00025	0.0017	Gs1, P5cr, ppl, Cbs, CG9547, GstZ1, GstZ2, P5cr-2, hgo	CG12338, CG15093
cluster_8	6	GO:0006633	fatty acid biosynthetic process	BP	32	6	1.46	4.11	2	0.0028	0.013	CG10932, eloF, CG9458, CG30008, Desat1, Baldspot	eas, Gs1, P5cr, Cbs, P5cr-2
cluster_8	13	GO:0009127	purine nucleoside monophosphate biosynthetic process	BP	27	5	1.23	4.06	2	0.0067	0.024	Prat, ATPsynO, knon, AdenoK, Prat2	CG6767, eas, Arf79F, Stt3B, OstDelta
cluster_8	3	GO:0043436	oxoacid metabolic process	BP	190	32	8.67	3.68	1.9	4.1e-11	1.2e-09	Gs1, Idh, Aldh, Cyp6a8, P5cr, Pdk, ATPCL, ppl, CG10932, Mfe2, Cbs, CG9527, CG9547, CG17544, CG12338, CG6543, CG15093, Acox57D-d, CG12262, CG5618, GstZ1, GstZ2, eloF, CG9458, P5cr-2, yip2, hgo, CG3699, CG30008, CG31075, Desat1, Baldspot	Eip55E, Faa, CG5599, CG11796, Idh3b
cluster_8	1	GO:0016491	oxidoreductase activity	MF	334	54	15.24	3.56	1.8	8.4e-18	1e-15	Cat, Cyp6a2, Gs1, Idh, Pxn, Aldh, Cyp6a8, Sptr, Cyp9b2, P5cr, Cyp6g1, Fad2, Mfe2, CG3597, CG3609, Cyp28d1, CG9527, CG9547, CG4036, CG13284, CG17544, Cyp6w1, Cyp6a14, CG12338, CG15093, CG7461, Acox57D-d, Cyp6d2, CG12766, CG12262, CG3902, CG11796, CG10512, CG12171, CG8199, CG10097, Cyp9f2, Cyp6d5, AOX3, P5cr-2, Arc42, Idh3b, Cyp6a18, hgo, CG3699, CG31075, CG31546, CG31548, CG31549, CG31674, CG18003…
cluster_8	2	GO:0016616	oxidoreductase activity, acting on the CH-OH group of donors, NAD or NADP as acceptor	MF	37	6	1.69	3.56	1.8	0.0059	0.024	Idh, Sptr, CG15093, CG12766, Idh3b, CG31674	CG12171, AOX3, CG3699, CG18003
cluster_8	2	GO:0004364	glutathione transferase activity	MF	38	6	1.73	3.46	1.8	0.0068	0.024	GstD3, Mgstl, GstZ1, GstZ2, CG33177, CG33178	l(3)02640
cluster_8	1	GO:0005783	endoplasmic reticulum	CC	129	20	5.88	3.39	1.8	1e-06	9.2e-06	Gtp-bp, Sec61beta, Stt3B, Tapdelta, CG5885, gammaCOP, Spase25, Sec61gamma, CG13284, OstDelta, Spase22-23, TRAM, tral, Sec61alpha, Desat1, Baldspot, tobi, twr, Dad1, Spn42Da
cluster_8	8	GO:0022627	cytosolic small ribosomal subunit	CC	40	6	1.82	3.29	1.7	0.0087	0.031	RpS19a, RpS28b, RpS15Ab, RpS5b, RpS27, RpS28a	RpL34b, mRpL46, mRpL40
cluster_8	1	GO:0055114	oxidation-reduction process	BP	329	49	15.01	3.27	1.7	1.3e-14	7.7e-13	Cat, Cyp6a2, Idh, Pxn, Aldh, Cyp6a8, Sptr, Cyp9b2, P5cr, Cyp6g1, Fad2, CG5599, Mfe2, CG3609, Cyp28d1, CG9527, CG9547, CG4036, CG17544, Cyp6w1, Cyp6a14, CG12338, CG6543, CG15093, CG7461, Acox57D-d, Cyp6d2, CG12766, CG12262, CG3902, CG11796, CG10512, Cyp9f2, Cyp6d5, AOX3, P5cr-2, Arc42, Idh3b, Cyp6a18, yip2, hgo, CG3699, CG31075, CG31674, CG18003, su(r), Desat1, GlyS, SelR
cluster_8	1	GO:0016757	transferase activity, transferring glycosyl groups	MF	49	7	2.24	3.14	1.6	0.0062	0.024	Prat, Stt3B, OstDelta, CG18128, Prat2, Dad1, GlyS
cluster_8	1	GO:0005811	lipid droplet	CC	170	24	7.75	3.1	1.6	4.7e-07	5.1e-06	Gs1, Hsp68, Idh, Gtp-bp, wal, Aldh, ScpX, ATPsynO, ATPCL, Tapdelta, CG5885, Mgstl, eEF1beta, CG10932, Ldsdh1, CG6543, CG15093, CG7461, CG12262, RpS27, yip2, TRAM, Capr, Desat1
cluster_8	2	GO:0016747	transferase activity, transferring acyl groups other than amino-acyl groups	MF	81	11	3.7	2.97	1.6	0.00098	0.0051	ScpX, CG10932, CG5599, CG14615, CG17597, CG1941, eloF, CG9458, yip2, CG30008, Baldspot	ATPCL
cluster_8	1	GO:0051235	maintenance of location	BP	68	8	3.1	2.58	1.4	0.011	0.039	ImpL2, mago, betaCOP, Arf79F, Ank, Tapdelta, beta'COP, gammaCOP
cluster_8	2	GO:0098588	bounding membrane of organelle	CC	141	16	6.43	2.48	1.3	0.00058	0.0033	betaCOP, Gtp-bp, Sec61beta, Tapdelta, Sec13, CG5885, beta'COP, Mgstl, epsilonCOP, gammaCOP, AP-1gamma, Sec61gamma, Pmp70, Tspo, Sec61alpha, Baldspot	ATPsynO, knon
cluster_8	2	GO:0005759	mitochondrial matrix	CC	102	11	4.65	2.36	1.2	0.0063	0.024	wal, Aldh, Pdk, CG5599, CG9547, CG6543, mRpL46, SCOT, CG8199, mRpL40, CG31075	ATPsynO, Mgstl, Tspo, knon, Baldspot
cluster_8	1	GO:0044281	small molecule metabolic process	BP	534	50	24.36	2.06	1	2.1e-07	2.6e-06	Eip55E, Gs1, Idh, Prat, wal, Aldh, Cyp6a8, P5cr, Faa, ATPsynO, Pdk, ATPCL, ppl, CG10932, CG5599, Mfe2, Cbs, Tspo, CG9527, CG9547, CG17544, CG12338, CG6543, knon, CG15093, Acox57D-d, CG18128, SCOT, CG12262, CG6767, AdenoK, CG5618, CG11796, GstZ1, GstZ2, eloF, CG9458, P5cr-2, Idh3b, yip2, hgo, CG3699, Prat2, CG30008, CG31075, CG33056, su(r), Desat1, Baldspot, GlyS
cluster_8	3	GO:0044248	cellular catabolic process	BP	255	23	11.63	1.97	0.98	0.0011	0.0055	Idh, Prosbeta6, piwi, Prosbeta1, Prosalpha7, Cyp6g1, ppl, Prosbeta5, Mfe2, CG9527, CG9547, CG17544, CG6543, Acox57D-d, SCOT, CG12262, GstZ1, GstZ2, yip2, hgo, CG3699, Ubi-p5E, GlyS	Oscillin
cluster_8	1	GO:0005739	mitochondrion	CC	392	30	17.88	1.68	0.75	0.0028	0.013	Gs1, Hsp68, Idh, wal, Aldh, ScpX, ATPsynO, Pdk, Mgstl, ppl, CG10932, CG5599, Tspo, CG9547, CG4594, CG6543, knon, CG15093, mRpL46, SCOT, CG12262, CG3902, CG8199, mRpL40, TFAM, Idh3b, yip2, CG31075, CG33178, Baldspot
cluster_5	3	GO:0045026	plasma membrane fusion	BP	6	6	0.97	6.2	2.6	1.7e-05	0.00016	comt, Snap25, Syx1A, GABA-B-R2, CDase, alphaSnap
cluster_5	1	GO:0030676	Rac guanyl-nucleotide exchange factor activity	MF	5	5	0.8	6.2	2.6	0.00011	0.00071	Sos, pbl, mbc, Vav, sif
cluster_5	4	GO:0034243	regulation of transcription elongation from RNA polymerase II promoter	BP	10	9	1.61	5.6	2.5	5.9e-07	9.4e-06	dre4, trx, fs(1)h, TfIIFalpha, TH1, TfIIFbeta, NELF-B, Nelf-A, EloA	atms, Atu, Rtf1, Spt5
cluster_5	2	GO:0032968	positive regulation of transcription elongation from RNA polymerase II promoter	BP	7	6	1.13	5.3	2.4	0.0001	0.00069	dre4, trx, fs(1)h, TfIIFalpha, TfIIFbeta, EloA	Spt5
cluster_5	2	GO:0048846	axon extension involved in axon guidance	BP	6	5	0.97	5.2	2.4	0.00056	0.0028	Abi, Dscam1, RhoGAP100F, SCAR, Liprin-alpha
cluster_5	4	GO:0099558	maintenance of synapse structure	BP	6	5	0.97	5.2	2.4	0.00056	0.0028	Rab3, Synj, RhoGAP100F, beta-Spec, brp	Lam, Rac1, jar, Rac2, RhoGAP5A
cluster_5	5	GO:2000648	positive regulation of stem cell proliferation	BP	6	5	0.97	5.2	2.4	0.00056	0.0028	brm, mtd, Dap160, bun, aPKC	conu, SelD, mts
cluster_5	1	GO:0000164	protein phosphatase type 1 complex	CC	6	5	0.97	5.2	2.4	0.00056	0.0028	flw, Pp1alpha-96A, Pp1-87B, A16, sds22
cluster_5	4	GO:0005089	Rho guanyl-nucleotide exchange factor activity	MF	17	14	2.74	5.1	2.4	2.9e-09	1.1e-07	Sos, pbl, mbc, RtGEF, RhoGEF2, trio, CG10188, Vav, Unc-89, sif, Exn, CG43102, RhoGEF3, Cdep	Efa6, Epac
cluster_5	4	GO:0005665	DNA-directed RNA polymerase II, core complex	CC	11	9	1.77	5.1	2.4	2.8e-06	3.6e-05	RpII18, RpII15, RpII33, Rpb11, Rpb5, Rpb8, Rpb10, Rpb7, RpII140	CG3756, hrg
cluster_5	5	GO:0006171	cAMP biosynthetic process	BP	10	8	1.61	5	2.3	1.4e-05	0.00014	Galphas, rut, Ac76E, Ac13E, Pdf, Ac78C, GABA-B-R2, GABA-B-R1	dnc, Gycbeta100B, Pde9
cluster_5	9	GO:0016059	deactivation of rhodopsin mediated signaling	BP	13	10	2.09	4.8	2.3	2e-06	2.7e-05	Arr1, Arr2, inaD, ninaC, Galphaq, Gbeta76C, inaC, rdgA, norpA, rdgC	ninaA, Sh, GABA-B-R2
cluster_5	1	GO:0005686	U2 snRNP	CC	13	10	2.09	4.8	2.3	2e-06	2.7e-05	snf, noi, Spx, U2af38, Sf3b1, Sf3b2, U2A, Sf3b3, Sf3a2, Sf3a1
cluster_5	4	GO:2000142	regulation of DNA-templated transcription, initiation	BP	9	7	1.45	4.8	2.3	7.3e-05	0.00052	B52, TfIIFalpha, TfIIFbeta, Srp54, x16, NC2alpha, SC35	Taf4, Taf1
cluster_5	3	GO:0031440	regulation of mRNA 3'-end processing	BP	8	6	1.29	4.7	2.2	0.00036	0.002	swm, B52, Srp54, x16, elav, SC35	tra2, hfp
cluster_5	1	GO:0005682	U5 snRNP	CC	8	6	1.29	4.7	2.2	0.00036	0.002	CG3436, Dim1, holn1, CG10333, CG4849, l(3)72Ab
cluster_5	4	GO:0046928	regulation of neurotransmitter secretion	BP	11	8	1.77	4.5	2.2	4.5e-05	0.00034	CASK, GABA-B-R2, Syt4, Frq1, Frq2, Dys, Exn, Fife	jar, Syx1A, Snx3, RhoGAP92B, Rab26
cluster_5	4	GO:0030808	regulation of nucleotide biosynthetic process	BP	7	5	1.13	4.4	2.2	0.0017	0.0068	Galphas, sesB, Pdf, GABA-B-R2, GABA-B-R1
cluster_5	1	GO:0050909	sensory perception of taste	BP	7	5	1.13	4.4	2.2	0.0017	0.0068	Galphao, Galphas, Sh, Ac78C, norpA
cluster_5	5	GO:0000815	ESCRT III complex	CC	7	5	1.13	4.4	2.2	0.0017	0.0068	Vps20, Chmp1, Vps24, Vps2, shrb	Hrs, CG10103, drk, Vav, Vps36
cluster_5	4	GO:0031523	Myb complex	CC	7	5	1.13	4.4	2.2	0.0017	0.0068	Dp, Rbf, mip130, mip120, mip40
cluster_5	3	GO:0016849	phosphorus-oxygen lyase activity	MF	7	5	1.13	4.4	2.2	0.0017	0.0068	rut, Ac76E, Gycbeta100B, Ac13E, Ac78C	Gad1, CG8239
cluster_5	1	GO:0007266	Rho protein signal transduction	BP	30	21	4.83	4.3	2.1	5.6e-11	3.2e-09	Sos, pbl, Cdc42, Rac2, RtGEF, RhoGEF2, trio, RhoGAPp190, Graf, CG10188, CdGAPr, RhoGAP68F, RhoGAP100F, Vav, Unc-89, sif, tum, Exn, CG43102, RhoGEF3, Cdep
cluster_5	1	GO:0048786	presynaptic active zone	CC	10	7	1.61	4.3	2.1	0.00021	0.0013	Rab3, nSyb, RhoGAP100F, Liprin-alpha, brp, Fife, CaMKII
cluster_5	3	GO:0048675	axon extension	BP	25	17	4.02	4.2	2.1	8.2e-09	2.7e-07	bsk, dnc, DCTN1-p150, rut, Sh, hep, Rac1, Cdc42, Abi, trio, DAAM, Dscam1, Strip, RhoGAP100F, SCAR, Liprin-alpha, Nrg	eag, Hem
cluster_5	1	GO:0097525	spliceosomal snRNP complex	CC	38	24	6.12	3.9	2	6.4e-11	3.4e-09	snf, noi, Psi, Spx, snRNP-U1-70K, U2af38, CG3436, Sf3b1, Sf3b2, Dim1, CG17768, holn1, CG10333, U2A, Sf3b3, CG10418, Sf3a2, U4-U6-60K, Prp3, CG4849, CG1646, LSm3, l(3)72Ab, Sf3a1
cluster_5	2	GO:0046839	phospholipid dephosphorylation	BP	8	5	1.29	3.9	2	0.0039	0.014	Ocrl, Pten, Synj, CG6707, 5PtaseI
cluster_5	2	GO:0005905	clathrin-coated pit	CC	8	5	1.29	3.9	2	0.0039	0.014	AP-1-2beta, Clc, CG8176, lap, AP-2alpha
cluster_5	1	GO:0030532	small nuclear ribonucleoprotein complex	CC	54	32	8.69	3.7	1.9	4.8e-13	4.8e-11	SmF, snf, noi, Psi, Spx, snRNP-U1-70K, U2af38, SmD3, CG3436, Sf3b1, Sf3b2, Dim1, CG17768, holn1, CG10333, U2A, Sf3b3, CG10418, Sf3a2, U4-U6-60K, CG6841, Prp3, CG4849, CG1646, LSm3, SmD2, SmE, SNRPG, SmD1, SmB, l(3)72Ab, Sf3a1
cluster_5	6	GO:0035011	melanotic encapsulation of foreign target	BP	22	13	3.54	3.7	1.9	5.3e-06	6.1e-05	DCTN1-p150, LanA, Rac1, Cdc42, Rac2, Pten, Eb1, RhoBTB, Vav, Exn, aPKC, RhoGEF3, Nrg	bsk, hep, ple, Tbh, Rab32, rb, Vha44
cluster_5	4	GO:0061343	cell adhesion involved in heart morphogenesis	BP	10	6	1.61	3.7	1.9	0.002	0.0077	Gbeta13F, Galphao, cora, prc, Cont, Nrg	LanB1, LanA, mys, simj, stumps
cluster_5	6	GO:2000370	positive regulation of clathrin-dependent endocytosis	BP	10	6	1.61	3.7	1.9	0.002	0.0077	Pkc53E, inaC, CASK, Nrx-1, lap, norpA	vap, stnB, drpr, AP-2alpha, Syx7
cluster_5	1	GO:0016328	lateral plasma membrane	CC	14	8	2.25	3.6	1.8	0.00053	0.0028	dlg1, mys, RhoGEF2, vari, beta-Spec, CG42748, hts, Nrg
cluster_5	1	GO:1900073	regulation of neuromuscular synaptic transmission	BP	12	7	1.93	3.6	1.9	0.001	0.0045	comt, Csp, Syt1, Galphaq, CASK, Tomosyn, Nrx-1
cluster_5	2	GO:0030426	growth cone	CC	12	7	1.93	3.6	1.9	0.001	0.0045	Cdc42, jar, chb, gek, trio, DAAM, Abp1
cluster_5	2	GO:0019897	extrinsic component of plasma membrane	CC	27	15	4.35	3.5	1.8	2.8e-06	3.6e-05	Gbeta13F, Galphao, Galphas, inaD, Sos, ninaC, Galphaq, Gbeta76C, inaC, alpha-Cat, Rac1, mbc, trio, Gbeta5, norpA	Rop, Pi3K21B, alphaSnap, Cdep
cluster_5	5	GO:0031503	protein-containing complex localization	BP	9	5	1.45	3.5	1.8	0.0076	0.024	Lam, Cdc42, LamC, aPKC, kis	stumps, pyd, Syx7
cluster_5	1	GO:0035025	positive regulation of Rho protein signal transduction	BP	9	5	1.45	3.5	1.8	0.0076	0.024	RhoGEF2, trio, CG10188, Exn, CG43102
cluster_5	2	GO:0016027	inaD signaling complex	CC	9	5	1.45	3.5	1.8	0.0076	0.024	inaD, ninaC, Galphaq, inaC, norpA	Ac78C, Dscam1
cluster_5	16	GO:0030125	clathrin vesicle coat	CC	9	5	1.45	3.5	1.8	0.0076	0.024	AP-1-2beta, Clc, AP-1mu, AP-1sigma, AP-2alpha	rb, stnB, WASp, Vps24, lap
cluster_5	2	GO:0042734	presynaptic membrane	CC	9	5	1.45	3.5	1.8	0.0076	0.024	dlg1, LanA, Dap160, brp, Exn	nAChRbeta1, Syt4, veli, CaMKII
cluster_5	6	GO:1905360	GTPase complex	CC	11	6	1.77	3.4	1.8	0.0038	0.014	Gbeta13F, Galphao, Galphas, Galphaq, Gbeta76C, Gbeta5	Sos, trio
cluster_5	2	GO:0071011	precatalytic spliceosome	CC	106	56	17.06	3.3	1.7	9.4e-19	7.5e-16	SmF, snf, tra2, nonA, Pep, B52, Pabp2, Ref1, noi, rin, Spx, snRNP-U1-70K, U2af38, Rack1, Cbp80, Cbp20, qkr58E-1, SmD3, Srp54, Neos, SF1, x16, hfp, CG3436, Sf3b1, CG4887, Sf3b2, Dim1, Phf5a, CG10333, U2A, Sf3b3, CG10418, Sf3a2, U4-U6-60K, CG6841, Prp3, CG9667, CG7483, Pnn, CG6015, PQBP1, CG4849, c12.1, CG30122, LSm3, SmD2, SmE, SNRPG, SmD1, SmB, Acn, sqd, l(3)72Ab, Cdc5, Sf3a1	Hel25E, l(1)G0007, SC35
cluster_5	6	GO:0000380	alternative mRNA splicing, via spliceosome	BP	51	27	8.21	3.3	1.7	1.1e-09	4.8e-08	fl(2)d, snf, tra2, Hrb87F, B52, Hel25E, Psi, snRNP-U1-70K, U2af38, dom, qkr58E-3, Srp54, l(1)G0007, x16, hfp, CG4896, CG7185, CG10418, CG6841, CG2926, CG1646, mub, sqd, l(3)72Ab, SC35, Sf3a1, HnRNP-K	Pep, swm, elav
cluster_5	4	GO:0016081	synaptic vesicle docking	BP	17	9	2.74	3.3	1.7	0.00049	0.0027	Syb, Snap25, nSyb, Syx1A, CASK, Syx17, Syx8, Exo84, Syx7	Rop
cluster_5	2	GO:0008187	poly-pyrimidine tract binding	MF	15	8	2.41	3.3	1.7	0.00097	0.0043	snf, nonA, heph, U2af38, Srp54, hfp, elav, mub	Pep, Pabp2
cluster_5	1	GO:0071013	catalytic step 2 spliceosome	CC	91	47	14.65	3.2	1.7	2.2e-15	3.4e-13	SmF, snf, nonA, Pep, B52, Pabp2, Ref1, noi, rin, snRNP-U1-70K, Rack1, Cbp80, Cbp20, qkr58E-1, SmD3, Srp54, x16, hfp, CG3436, Sf3b1, Sf3b2, Phf5a, CG10333, U2A, Sf3b3, CG10418, Sf3a2, U4-U6-60K, CG6841, CG9667, CG7483, Pnn, CG6015, PQBP1, CG4849, c12.1, LSm3, SmD2, SmE, SNRPG, SmD1, SmB, Acn, sqd, l(3)72Ab, Cdc5, Sf3a1
cluster_5	2	GO:0043547	positive regulation of GTPase activity	BP	25	13	4.02	3.2	1.7	3.4e-05	0.00027	pbl, RanGAP, vap, mbc, RtGEF, Rlip, RhoGAP5A, Ced-12, RhoGAP92B, RhoGAP93B, RhoGAP100F, conu, Vav	Galphaq, Gbeta76C, SERCA
cluster_5	1	GO:0016028	rhabdomere	CC	21	11	3.38	3.2	1.7	0.00013	0.00085	Arr1, Arr2, inaD, ninaC, Galphaq, Gbeta76C, inaC, Rac1, Cdc42, WASp, norpA
cluster_5	6	GO:0008021	synaptic vesicle	CC	55	27	8.85	3.1	1.6	9.9e-09	3.1e-07	comt, rb, Syb, Csp, Syt1, Syn, Gdi, Rab3, CanB, AP-1-2beta, nSyb, Syx1A, CanB2, stnB, stnA, Dap160, Clc, AP-1mu, Syt4, Tomosyn, Hrs, AP-1sigma, Syt7, Frq2, lap, Vmat, AP-2alpha	ninaA, jar, O-fut1, apolpp, alphaSnap
cluster_5	1	GO:0060560	developmental growth involved in morphogenesis	BP	51	25	8.21	3.1	1.6	3.7e-08	9.4e-07	bsk, dnc, DCTN1-p150, LanA, rut, Sh, mys, hep, Rac1, Cdc42, Rac2, Abi, RhoGEF2, trio, DAAM, Tollo, Dscam1, Strip, RhoGAP100F, SCAR, Liprin-alpha, vari, alphaSnap, cno, Nrg
cluster_5	2	GO:0031124	mRNA 3'-end processing	BP	24	12	3.86	3.1	1.6	0.00011	0.00075	swm, B52, Pabp2, hrg, Srp54, Cpsf160, Cpsf100, x16, cbc, CG3689, elav, SC35	CG16790
cluster_5	1	GO:0007629	flight behavior	BP	22	11	3.54	3.1	1.6	0.00022	0.0013	ben, eag, fliI, sesB, Sh, Galphaq, Tbh, stnA, Eb1, SERCA, Hk
cluster_5	4	GO:0045494	photoreceptor cell maintenance	BP	20	10	3.22	3.1	1.6	0.00043	0.0024	Arr1, Arr2, ninaA, ninaC, chn, Srp54, CDase, rdgA, norpA, rdgC	peb, mys
cluster_5	2	GO:0008287	protein serine/threonine phosphatase complex	CC	20	10	3.22	3.1	1.6	0.00043	0.0024	flw, Pp1alpha-96A, Pp1-87B, mts, CanB, Pp2B-14D, CanB2, A16, sds22, Pp2A-29B	CG3626
cluster_5	1	GO:0019992	diacylglycerol binding	MF	18	9	2.9	3.1	1.6	0.00085	0.0039	Pkc53E, inaC, gek, RhoGEF2, RhoGAP5A, Vav, tum, rdgA, CG43729
cluster_5	2	GO:0008345	larval locomotory behavior	BP	16	8	2.58	3.1	1.6	0.0017	0.0068	Sh, Syt1, Gad1, Tbh, CalpA, Eaat1, drpr, G9a	SPARC
cluster_5	1	GO:0070050	neuron cellular homeostasis	BP	16	8	2.58	3.1	1.6	0.0017	0.0068	comt, sesB, Csp, Galphaq, Syx17, Gyf, alc, hts
cluster_5	4	GO:0006379	mRNA cleavage	BP	12	6	1.93	3.1	1.6	0.0066	0.022	Cpsf160, Cpsf100, CG7185, CG3689, AGO1, Pcf11	cbc
cluster_5	1	GO:0048167	regulation of synaptic plasticity	BP	12	6	1.93	3.1	1.6	0.0066	0.022	comt, Snap25, Sap47, Syt4, brp, Dys
cluster_5	1	GO:0007632	visual behavior	BP	10	5	1.61	3.1	1.6	0.013	0.038	Galphas, Pp1-87B, nonA, Syn, ogre
cluster_5	3	GO:0018208	peptidyl-proline modification	BP	10	5	1.61	3.1	1.6	0.013	0.038	ninaA, Cyp1, CG2852, CG7768, PH4alphaEFB	CG14715
cluster_5	1	GO:0043052	thermotaxis	BP	10	5	1.61	3.1	1.6	0.013	0.038	Galphaq, ple, rdgA, norpA, rdgC
cluster_5	3	GO:0043162	ubiquitin-dependent protein catabolic process via the multivesicular body sorting pathway	BP	10	5	1.61	3.1	1.6	0.013	0.038	Vps20, Vps2, shrb, Vps36, Vps4	CG6707, Chmp1, Vps24, Vamp7, Hrs
cluster_5	3	GO:0071711	basement membrane organization	BP	10	5	1.61	3.1	1.6	0.013	0.038	hep, Pten, SPARC, LanB1, PI4KIIIalpha	Pgant3, flw, Btk29A, Hsp60C, hts
cluster_5	4	GO:0090263	positive regulation of canonical Wnt signaling pathway	BP	10	5	1.61	3.1	1.6	0.013	0.038	flw, Pp1alpha-96A, Pp1-87B, Wnk, Snx3	spen, gro, pbl, mts
cluster_5	5	GO:0022843	voltage-gated cation channel activity	MF	10	5	1.61	3.1	1.6	0.013	0.038	eag, Sh, Irk2, NaCP60E, Hk	nrv1, Wnk
cluster_5	2	GO:0098793	presynapse	CC	92	44	14.81	3	1.6	6e-13	5.3e-11	comt, dlg1, LanA, rb, Syb, Csp, Syt1, Rop, Syn, Gdi, Rab3, CanB, AP-1-2beta, Snap25, nSyb, Syx1A, CanB2, Past1, stnB, stnA, Dap160, Clc, AP-1mu, Eaat1, Syt4, Tomosyn, Hrs, Synj, Abp1, AP-1sigma, RhoGAP100F, Syt7, Liprin-alpha, Mical, Frq2, lap, alphaSnap, brp, par-1, Vmat, Exn, Fife, CaMKII, AP-2alpha	nAChRbeta1, hig, RtGEF, veli, Prosap
cluster_5	2	GO:0072583	clathrin-dependent endocytosis	BP	50	24	8.05	3	1.6	1.2e-07	2.6e-06	Dab, Pkc53E, rb, Csp, Syt1, inaC, AP-1-2beta, Arf51F, CASK, stnB, stnA, Dap160, WASp, Clc, AP-1mu, Synj, aux, CG8176, EndoA, Nrx-1, AP-1sigma, lap, norpA, AP-2alpha	Su(dx), Rlip, LpR1
cluster_5	4	GO:0016079	synaptic vesicle exocytosis	BP	45	22	7.24	3	1.6	2.6e-07	5.1e-06	comt, Syb, Csp, Syt1, Rop, Syn, Snap25, nSyb, Syx1A, CASK, stnA, GABA-B-R2, Syt4, Tomosyn, Hrs, Syx17, Syx8, CDase, Syt7, alphaSnap, Exo84, Syx7	rb, jar, Rab26
cluster_5	1	GO:0031594	neuromuscular junction	CC	37	18	5.96	3	1.6	3.6e-06	4.5e-05	comt, dlg1, Syt1, RtGEF, WASp, Eaat1, Syt4, Tomosyn, Cip4, Abp1, RhoGAP92B, Nrx-1, beta-Spec, brp, par-1, Vmat, Exn, nwk
cluster_5	4	GO:0007520	myoblast fusion	BP	35	17	5.63	3	1.6	7e-06	7.9e-05	Pfk, Rac1, dock, Hem, CalpA, Arf51F, Rac2, Pglym78, mbc, sns, WASp, Ced-12, Vav, SCAR, Pak3, mib2, Pgk
cluster_5	3	GO:0050770	regulation of axonogenesis	BP	23	11	3.7	3	1.6	0.00036	0.002	pbl, Rac1, Cdc42, Rac2, RhoGEF2, trio, DAAM, RhoGAPp190, Dscam1, Liprin-alpha, sif	G9a, Rop, Pten
cluster_5	5	GO:0048489	synaptic vesicle transport	BP	92	43	14.81	2.9	1.5	3e-12	2.2e-10	comt, Dab, DCTN1-p150, rb, sesB, Syb, Csp, Syt1, Rop, Syn, AP-1-2beta, Snap25, nSyb, Syx1A, Arf51F, CASK, stnB, stnA, Dap160, Clc, AP-1mu, GABA-B-R2, htt, Syt4, Tomosyn, Hrs, Synj, Syx17, Syx8, aux, EndoA, Nrx-1, AP-1sigma, Miro, CDase, Syt7, Liprin-alpha, lap, alphaSnap, AP-2alpha, Exo84, btsz, Syx7	RhoGAP100F, Fife
cluster_5	6	GO:0007269	neurotransmitter secretion	BP	93	43	14.97	2.9	1.5	4.8e-12	3.1e-10	comt, Syb, Csp, Syt1, Rop, Syn, Gdi, Rab3, CanB, AP-1-2beta, Snap25, nSyb, Syx1A, Arf51F, CASK, CanB2, stnB, stnA, Dap160, Clc, AP-1mu, GABA-B-R2, Syt4, Tomosyn, Frq1, Hrs, Synj, Syx17, Syx8, EndoA, AP-1sigma, CDase, Syt7, Frq2, lap, alphaSnap, brp, Dys, Exn, Fife, AP-2alpha, Exo84, Syx7	Gad1, Tbh, CG10804, Vmat, Snx3, RhoGAP92B
cluster_5	5	GO:0007602	phototransduction	BP	34	16	5.47	2.9	1.6	2.2e-05	0.00019	Arr1, Arr2, inaD, ninaA, ninaC, Galphaq, Gbeta76C, ogre, inaC, chn, Srp54, Synj, Opa1, rdgA, norpA, rdgC	Sh, Dscam1, Ac78C
cluster_5	1	GO:0008023	transcription elongation factor complex	CC	26	12	4.19	2.9	1.5	0.0003	0.0017	dre4, trx, Cyp1, TH1, atms, Atu, EloB, NELF-B, Rtf1, Nelf-A, EloA, Spt5
cluster_5	1	GO:0005516	calmodulin binding	MF	26	12	4.19	2.9	1.5	0.0003	0.0017	inaD, ninaC, CanB, jar, Pp2B-14D, igl, CanB2, CaMKI, beta-Spec, Patronin, CaMKII, rdgC
cluster_5	1	GO:0030139	endocytic vesicle	CC	13	6	2.09	2.9	1.5	0.011	0.032	AP-1-2beta, jar, stnB, stnA, apolpp, AP-2alpha
cluster_5	2	GO:0099003	vesicle-mediated transport in synapse	BP	81	37	13.04	2.8	1.5	2.4e-10	1.2e-08	comt, Dab, rb, Syb, Csp, Syt1, Rop, Syn, AP-1-2beta, Snap25, nSyb, Syx1A, Arf51F, CASK, stnB, stnA, Dap160, Clc, AP-1mu, GABA-B-R2, Syt4, Tomosyn, Hrs, Synj, Syx17, Syx8, aux, EndoA, Nrx-1, AP-1sigma, CDase, Syt7, lap, alphaSnap, AP-2alpha, Exo84, Syx7	Vmat, Fife
cluster_5	1	GO:0050804	modulation of chemical synaptic transmission	BP	48	22	7.73	2.8	1.5	1.1e-06	1.6e-05	Pka-C1, comt, Sh, Csp, Syt1, Galphaq, Snap25, Sap47, CASK, Eaat1, GABA-B-R2, Syt4, Tomosyn, Frq1, KaiR1D, Nrx-1, Frq2, beta-Spec, brp, Dys, Exn, Fife
cluster_5	2	GO:0036465	synaptic vesicle recycling	BP	43	19	6.92	2.8	1.5	1.1e-05	0.00012	Dab, rb, Csp, Syt1, AP-1-2beta, Arf51F, CASK, stnB, stnA, Dap160, Clc, AP-1mu, Synj, aux, EndoA, Nrx-1, AP-1sigma, lap, AP-2alpha
cluster_5	4	GO:0043679	axon terminus	CC	35	16	5.63	2.8	1.5	3.4e-05	0.00027	comt, dlg1, Csp, Syt1, Rop, Syn, Snap25, nSyb, Syx1A, Past1, Eaat1, Synj, Abp1, Mical, alphaSnap, par-1	DAAM
cluster_5	1	GO:0000149	SNARE binding	MF	24	11	3.86	2.8	1.5	0.00058	0.0029	Syt1, Rop, Snap25, nSyb, Syx1A, Syt4, Tomosyn, Syx17, alphaSnap, Vamp7, Syx7
cluster_5	1	GO:0033627	cell adhesion mediated by integrin	BP	18	8	2.9	2.8	1.5	0.0042	0.015	LanA, mys, Hem, Abi, Pgant3, Sra-1, SCAR, LanB1
cluster_5	1	GO:0055037	recycling endosome	CC	18	8	2.9	2.8	1.5	0.0042	0.015	Rab32, Arf51F, Rab10, Ocrl, CG11178, RhoGAP68F, Rab26, nwk
cluster_5	4	GO:0000398	mRNA splicing, via spliceosome	BP	165	72	26.56	2.7	1.4	9.4e-18	2.5e-15	SmF, fl(2)d, snf, tra2, nonA, Hrb87F, Pep, B52, Pabp2, Ref1, heph, Hel25E, noi, Psi, rin, Spx, snRNP-U1-70K, U2af38, dom, Rack1, Cbp80, Cbp20, qkr58E-3, qkr58E-1, SmD3, Srp54, Neos, SF1, l(1)G0007, x16, hfp, CG3436, Sf3b1, CG4887, CG4896, Sf3b2, Dim1, Phf5a, CG17768, CG10333, U2A, Sf3b3, CG7185, CG10418, Sf3a2, U4-U6-60K, CG6841, Prp3, CG2926, CG9667, CG7483, Pnn, CG6015, PQBP1, CG4849, CG1646, c…	cbc, RnpS1, btz
cluster_5	4	GO:0006906	vesicle fusion	BP	28	12	4.51	2.7	1.4	0.00069	0.0033	comt, Syt1, Snap25, nSyb, Syx1A, GABA-B-R2, Syt4, Syx8, CDase, alphaSnap, Vamp7, Syx7	Syx17, CG2023, atl, Opa1, Vps4
cluster_5	4	GO:1901184	regulation of ERBB signaling pathway	BP	23	10	3.7	2.7	1.4	0.0017	0.0068	brm, drk, Hrs, holn1, Vps20, Chmp1, Vps2, Vav, shrb, Vps4	spen, Nrg
cluster_5	2	GO:0016607	nuclear speck	CC	16	7	2.58	2.7	1.4	0.0082	0.025	Hrb87F, B52, qkr58E-3, sqd, SC35, rump, HnRNP-K	elav, SmB
cluster_5	2	GO:0016198	axon choice point recognition	BP	14	6	2.25	2.7	1.4	0.016	0.044	Sos, Galphaq, Rac1, RhoGAP93B, Trim9, beta-Spec
cluster_5	2	GO:0043631	RNA polyadenylation	BP	14	6	2.25	2.7	1.4	0.016	0.044	swm, Pabp2, hrg, Cpsf160, Cpsf100, CG3689
cluster_5	5	GO:0051491	positive regulation of filopodium assembly	BP	14	6	2.25	2.7	1.4	0.016	0.044	Rac1, Cdc42, DAAM, SCAR, sif, aPKC	Rop, G9a, hep, Arp2, CaMKII
cluster_5	1	GO:0045202	synapse	CC	149	62	23.99	2.6	1.4	3.2e-14	4.2e-12	nAChRbeta1, comt, dlg1, LanA, Rab32, rb, Syb, Csp, Syt1, Rop, Syn, Gdi, Rab3, CanB, hig, AP-1-2beta, Snap25, Sap47, nSyb, Syx1A, CanB2, Rab10, RtGEF, Past1, stnB, stnA, Dap160, WASp, Clc, AP-1mu, Eaat1, Syt4, Tomosyn, Frq1, Hrs, Synj, Cip4, Abp1, Sra-1, RhoGAP92B, Nrx-1, AP-1sigma, veli, RhoGAP100F, Syt7, Prosap, Liprin-alpha, Mical, Frq2, sif, lap, Rab26, beta-Spec, alphaSnap, brp, par-1, Vmat, …
cluster_5	3	GO:0005096	GTPase activator activity	MF	48	20	7.73	2.6	1.4	2e-05	0.00017	pbl, RanGAP, vap, Ocrl, Rlip, RhoGAPp190, RhoGAP5A, Graf, CdGAPr, RhoGAP68F, CG7324, RhoGAP92B, RhoGAP93B, RhoGAP100F, conu, Asap, tum, norpA, Evi5, rad	Gdi, RhoGDI, CG7394, alphaSnap
cluster_5	2	GO:0006397	mRNA processing	BP	198	81	31.87	2.5	1.4	8.3e-18	2.5e-15	SmF, fl(2)d, swm, snf, tra2, nonA, Hrb87F, Pep, B52, Pabp2, Ref1, heph, Hel25E, noi, Psi, rin, Spx, hrg, snRNP-U1-70K, U2af38, dom, Rack1, Cbp80, Cbp20, qkr58E-3, qkr58E-1, SmD3, Srp54, Neos, Cpsf160, SF1, Dek, l(1)G0007, Cpsf100, x16, hfp, CG3436, Sf3b1, CG4887, CG4896, Sf3b2, Dim1, Phf5a, CG17768, CG10333, U2A, cbc, Sf3b3, CG7185, CG3689, CG10418, Sf3a2, U4-U6-60K, CG6841, Prp3, CG2926, CG9667,…	RnpS1, CG16790, CG31550, AGO1
cluster_5	1	GO:0007626	locomotory behavior	BP	107	43	17.22	2.5	1.3	1.2e-09	4.9e-08	ben, Pka-C1, comt, dnc, eag, fliI, dlg1, Lam, LanA, sesB, Sh, Pp1-87B, Csp, Syt1, Galphaq, Gad1, ple, Tbh, Rac1, CalpA, CASK, Fer2LCH, stnA, Rack1, Pdf, Eaat1, Eb1, drpr, qsm, lid, trsn, Tk, kuk, unc79, krz, G9a, gw, brp, sxc, norpA, SERCA, Hk, hts
cluster_5	2	GO:0009416	response to light stimulus	BP	71	29	11.43	2.5	1.3	4.4e-07	7.8e-06	Arr1, Arr2, Galphas, inaD, dlg1, ninaA, ninaC, Sh, Pp1-87B, mts, nonA, Galphaq, Rop, Syn, Gbeta76C, ogre, inaC, Nmdar1, chn, AMPKalpha, Pdf, Srp54, Kap-alpha3, Synj, lap, Opa1, rdgA, norpA, rdgC
cluster_5	1	GO:0044463	cell projection part	CC	71	29	11.43	2.5	1.3	4.4e-07	7.8e-06	Arr2, comt, inaD, dlg1, ninaC, Csp, Syt1, Galphaq, Rop, Syn, inaC, Cdc42, jar, Snap25, nSyb, Syx1A, Past1, Abi, chb, gek, trio, DAAM, Eaat1, Synj, Abp1, Mical, alphaSnap, par-1, norpA
cluster_5	2	GO:0030424	axon	CC	75	30	12.07	2.5	1.3	4.8e-07	8.1e-06	bsk, comt, Dab, dlg1, Csp, Syt1, Rop, Syn, hep, Cdc42, Snap25, nSyb, Syx1A, Past1, gek, trio, DAAM, Eaat1, Dscam1, Synj, Abp1, Mical, beta-Spec, alphaSnap, par-1, kcc, pyd, CaMKII, rad, tau	Pka-C1, mys, jar, chb, homer
cluster_5	1	GO:0008344	adult locomotory behavior	BP	50	20	8.05	2.5	1.3	4e-05	0.0003	ben, eag, fliI, Lam, sesB, Sh, Pp1-87B, Galphaq, ple, Tbh, CASK, stnA, Eb1, trsn, Tk, kuk, brp, norpA, SERCA, Hk
cluster_5	1	GO:0007274	neuromuscular synaptic transmission	BP	45	18	7.24	2.5	1.3	9.7e-05	0.00066	comt, rut, Csp, Syt1, Galphaq, Cdc42, Snap25, Syx1A, CASK, Tomosyn, RhoGAP92B, Nrx-1, beta-Spec, alphaSnap, brp, Dys, SERCA, nwk
cluster_5	7	GO:0030833	regulation of actin filament polymerization	BP	30	12	4.83	2.5	1.3	0.0014	0.0061	spir, Btk29A, Cdc42, LamC, Arp2, WASp, DAAM, Arpc2, Cip4, RhoGAP92B, SCAR, nwk	gek, Mical, Jupiter
cluster_5	4	GO:0006626	protein targeting to mitochondrion	BP	27	11	4.35	2.5	1.3	0.0019	0.0074	Hsp60A, Tim17b2, CG1724, Hsp60C, Tom70, tomboy40, CG7394, CG8004, Tim17a2, Tim17b1, Tim17a1	sesB, Miro, GC1
cluster_5	2	GO:0005484	SNAP receptor activity	MF	22	9	3.54	2.5	1.4	0.0047	0.016	Syb, Snap25, nSyb, Syx1A, Syx17, Syx8, CG2023, Vamp7, Syx7	alphaSnap
cluster_5	1	GO:0031532	actin cytoskeleton reorganization	BP	20	8	3.22	2.5	1.3	0.009	0.028	Rac1, Cdc42, Rac2, RhoGEF2, trio, Vav, SCAR, CG32264
cluster_5	1	GO:0017053	transcriptional repressor complex	CC	20	8	3.22	2.5	1.3	0.009	0.028	TH1, simj, mip130, NELF-B, mip40, NC2alpha, MEP-1, Nelf-A
cluster_5	1	GO:0016071	mRNA metabolic process	BP	227	87	36.54	2.4	1.2	6.1e-17	1.2e-14	SmF, fl(2)d, swm, snf, tra2, nonA, Hrb87F, Pep, B52, Pabp2, Ref1, heph, Hel25E, noi, Psi, rin, Spx, hrg, snRNP-U1-70K, U2af38, pcm, dom, Rack1, Cbp80, Cbp20, qkr58E-3, qkr58E-1, SmD3, Srp54, Neos, Cpsf160, SF1, Dek, l(1)G0007, Cpsf100, x16, hfp, CG3436, Sf3b1, CG4887, CG4896, Sf3b2, Dim1, Phf5a, CG17768, CG10333, U2A, cbc, Upf3, Sf3b3, CG7185, CG3689, CG10418, Sf3a2, U4-U6-60K, CG6841, Prp3, CG29…
cluster_5	4	GO:0099536	synaptic signaling	BP	168	66	27.04	2.4	1.3	1.2e-13	1.4e-11	nAChRbeta1, Pka-C1, comt, dnc, Galphas, dlg1, rut, sesB, Sh, Syb, Csp, Syt1, Galphaq, Rop, Syn, Gdi, Rab3, CanB, Cdc42, AP-1-2beta, Snap25, Sap47, nSyb, Syx1A, Arf51F, CASK, CanB2, stnB, stnA, Dap160, Clc, AP-1mu, Eaat1, GABA-B-R2, Syt4, Tomosyn, Frq1, Hrs, Synj, Syx17, Syx8, EndoA, RhoGAP92B, KaiR1D, Nrx-1, AP-1sigma, Miro, CDase, Syt7, CG1909, Frq2, sif, lap, beta-Spec, alphaSnap, Pgk, brp, Dys…
cluster_5	1	GO:0016050	vesicle organization	BP	63	24	10.14	2.4	1.2	1.8e-05	0.00017	comt, Rab32, rb, Syt1, AP-1-2beta, Snap25, nSyb, Syx1A, stnB, WASp, Clc, AP-1mu, GABA-B-R2, Syt4, Hrs, Syx8, Vps24, AP-1sigma, CDase, lap, alphaSnap, AP-2alpha, Vamp7, Syx7
cluster_5	1	GO:0005543	phospholipid binding	MF	55	21	8.85	2.4	1.2	5.9e-05	0.00043	ninaC, pbl, Syt1, rush, drpr, Syt4, snz, Graf, Cip4, Abp1, CG8176, Snx3, EndoA, RhoGAP92B, Syt7, Asap, Efa6, lap, Vps36, beta-Spec, nwk
cluster_5	1	GO:0007612	learning	BP	52	20	8.37	2.4	1.3	7.8e-05	0.00054	Pka-C1, dnc, eag, Rab32, rut, Btk29A, Pp1-87B, Gad1, Syn, drk, Tbh, Nmdar1, simj, Sap47, Nrx-1, PQBP1, G9a, sra, AGO1, rad
cluster_5	1	GO:0043254	regulation of protein complex assembly	BP	52	20	8.37	2.4	1.3	7.8e-05	0.00054	spir, Btk29A, B52, TfIIFalpha, Cdc42, LamC, TfIIFbeta, Arp2, WASp, Srp54, DAAM, x16, Arpc2, NC2alpha, Cip4, RhoGAP92B, SCAR, Jupiter, nwk, SC35
cluster_5	2	GO:0032984	protein-containing complex disassembly	BP	28	11	4.51	2.4	1.3	0.0027	0.0099	comt, flw, Pp1alpha-96A, Pp1-87B, Csp, aux, atl, Mical, beta-Spec, alphaSnap, Patronin	hep
cluster_5	1	GO:0040012	regulation of locomotion	BP	28	11	4.51	2.4	1.3	0.0027	0.0099	LanA, mys, ple, Tbh, Rac1, CASK, homer, Pten, Hrs, Nrx-1, Liprin-alpha
cluster_5	1	GO:0007614	short-term memory	BP	18	7	2.9	2.4	1.3	0.017	0.045	Appl, dnc, rut, drk, G9a, brp, kis
cluster_5	2	GO:0030032	lamellipodium assembly	BP	18	7	2.9	2.4	1.3	0.017	0.045	hep, Rac1, Cdc42, Rac2, Abi, SCAR, aPKC
cluster_5	2	GO:0070507	regulation of microtubule cytoskeleton organization	BP	18	7	2.9	2.4	1.3	0.017	0.045	chb, CG17816, atl, Jupiter, tum, beta-Spec, Patronin
cluster_5	1	GO:0005703	polytene chromosome puff	CC	18	7	2.9	2.4	1.3	0.017	0.045	Su(var)205, Hrb87F, Pep, vig, RpII33, Spt5, sqd
cluster_5	1	GO:0045178	basal part of cell	CC	18	7	2.9	2.4	1.3	0.017	0.045	mys, jar, Rab10, Abi, RhoGEF2, SCAR, apolpp
cluster_5	3	GO:0015450	P-P-bond-hydrolysis-driven protein transmembrane transporter activity	MF	18	7	2.9	2.4	1.3	0.017	0.045	Tim17b2, CG1724, Tom70, tomboy40, Tim17a2, Tim17b1, Tim17a1	Kap-alpha3
cluster_5	1	GO:0097458	neuron part	CC	177	66	28.49	2.3	1.2	2.2e-12	1.8e-10	bsk, Pka-C1, comt, Dab, dlg1, LanA, rb, Syb, Csp, Syt1, Rop, Syn, mys, Gdi, Rab3, CanB, hig, hep, Cdc42, AP-1-2beta, jar, Snap25, CalpA, nSyb, Syx1A, CanB2, Rab10, Past1, stnB, stnA, chb, gek, Dap160, trio, Clc, AP-1mu, DAAM, homer, Eaat1, Syt4, Tomosyn, Hrs, Dscam1, Synj, Abp1, AP-1sigma, RhoGAP100F, Syt7, Prosap, Liprin-alpha, Mical, Frq2, lap, beta-Spec, alphaSnap, brp, par-1, Vmat, Exn, kcc, …
cluster_5	1	GO:0007264	small GTPase mediated signal transduction	BP	141	51	22.7	2.3	1.2	2.8e-09	1.1e-07	Sos, Rab32, pbl, vap, Pp1-87B, drk, Gdi, Rab3, Rac1, Cdc42, Cdc37, Arf51F, Rac2, mbc, rin, Rab10, RtGEF, chb, RhoGEF2, trio, Rlip, RhoGAPp190, Akap200, RhoGAP5A, Graf, CG10188, CdGAPr, Strip, RhoGAP68F, Sf3a2, RhoBTB, CG7483, CG8500, Miro, CG6607, CG4849, RhoGAP100F, Vav, Asap, Efa6, Unc-89, Epac, sif, tum, Rab26, cno, Exn, CG43102, RhoGEF3, Cdep, rad
cluster_5	1	GO:0007265	Ras protein signal transduction	BP	110	41	17.71	2.3	1.2	4.1e-08	1e-06	Sos, Rab32, pbl, vap, Pp1-87B, drk, Rab3, Cdc42, Cdc37, Rac2, rin, Rab10, RtGEF, chb, RhoGEF2, trio, Rlip, RhoGAPp190, Akap200, Graf, CG10188, CdGAPr, Strip, RhoGAP68F, Sf3a2, CG7483, CG6607, CG4849, RhoGAP100F, Vav, Efa6, Unc-89, Epac, sif, tum, Rab26, cno, Exn, CG43102, RhoGEF3, Cdep
cluster_5	1	GO:0007186	G-protein coupled receptor signaling pathway	BP	64	24	10.3	2.3	1.2	2.5e-05	0.00021	Arr1, Arr2, Gbeta13F, Galphao, Galphas, inaD, ninaC, rut, Galphaq, Gbeta76C, inaC, Tbh, Lgr1, Pdf, GABA-B-R2, Gbeta5, Nplp1, Tk, CG32638, Dop2R, GABA-B-R1, rdgA, norpA, rdgC
cluster_5	2	GO:0046578	regulation of Ras protein signal transduction	BP	68	25	10.95	2.3	1.2	2.5e-05	0.00021	Sos, pbl, vap, Pp1-87B, Cdc37, RtGEF, chb, RhoGEF2, trio, Rlip, Akap200, CG10188, Strip, Sf3a2, CG7483, CG4849, Vav, Efa6, Unc-89, Epac, sif, Exn, CG43102, RhoGEF3, Cdep	RhoGAP5A, rad
cluster_5	2	GO:0051146	striated muscle cell differentiation	BP	69	25	11.11	2.3	1.2	3.3e-05	0.00027	fliI, Pfk, mys, Rac1, dock, Hem, CalpA, Arf51F, Rac2, Pglym78, mbc, CanB2, sns, WASp, DAAM, Ced-12, Vav, SCAR, Pak3, Mical, Unc-89, mib2, Pgk, LanB1, hts
cluster_5	1	GO:0008047	enzyme activator activity	MF	69	25	11.11	2.3	1.2	3.3e-05	0.00027	bur, pbl, RanGAP, vap, Cdc37, Ocrl, Rlip, RhoGAPp190, RhoGAP5A, Graf, Frq1, CdGAPr, CG7394, RhoGAP68F, CG7324, RhoGAP92B, RhoGAP93B, RhoGAP100F, conu, Asap, tum, alphaSnap, norpA, Evi5, rad
cluster_5	2	GO:0032970	regulation of actin filament-based process	BP	55	20	8.85	2.3	1.2	0.00019	0.0012	Gbeta13F, spir, Btk29A, mys, Cdc42, LamC, jar, Arp2, Abi, gek, RhoGEF2, Ocrl, WASp, DAAM, Arpc2, Cip4, RhoGAP68F, RhoGAP92B, SCAR, nwk
cluster_5	4	GO:0016591	DNA-directed RNA polymerase II, holoenzyme	CC	43	16	6.92	2.3	1.2	0.00062	0.0031	RpII18, RpII15, Taf4, TfIIFalpha, Taf1, TfIIFbeta, atms, Atu, RpII33, Rpb11, Rpb5, Rtf1, Rpb8, Rpb10, Rpb7, RpII140	CG3756
cluster_5	4	GO:0007619	courtship behavior	BP	37	14	5.96	2.3	1.2	0.0011	0.0048	dnc, eag, dlg1, rut, Sh, Btk29A, nonA, Syn, ple, Tbh, CASK, Alh, CaMKII, Nrg	Rac2, Pdf, natalisin, sra, Rack1
cluster_5	1	GO:0048149	behavioral response to ethanol	BP	35	13	5.63	2.3	1.2	0.002	0.0078	Pka-C1, dnc, dlg1, rut, vap, Syn, Tbh, Nmdar1, Arf51F, CASK, homer, Akap200, CG3967
cluster_5	2	GO:0030866	cortical actin cytoskeleton organization	BP	30	11	4.83	2.3	1.2	0.005	0.017	Galphao, pbl, Rac1, Cdc42, Hem, Abi, Ocrl, Arpc2, Sra-1, SCAR, btsz	Rab3, RhoGAP100F, brp
cluster_5	1	GO:0034332	adherens junction organization	BP	27	10	4.35	2.3	1.2	0.0068	0.022	alpha-Cat, Rac1, Rac2, sns, Pten, RhoGAP5A, Cip4, Vav, aPKC, pyd
cluster_5	4	GO:0046488	phosphatidylinositol metabolic process	BP	27	10	4.35	2.3	1.2	0.0068	0.022	Pi3K21B, Ocrl, Pten, Synj, CG6707, PIP4K, 5PtaseI, rdgA, norpA, PI4KIIIalpha	Fpps, CG8239
cluster_5	2	GO:0051656	establishment of organelle localization	BP	155	54	24.95	2.2	1.1	4.5e-09	1.6e-07	comt, Dab, flw, DCTN1-p150, dlg1, Lam, rb, sesB, Syb, Pp1-87B, Csp, Syt1, Rop, Syn, AP-1-2beta, jar, Snap25, Arp1, nSyb, Syx1A, Arf51F, CASK, stnB, stnA, chb, Dap160, Clc, AP-1mu, Eb1, GABA-B-R2, htt, Syt4, Tomosyn, Hrs, Synj, Syx17, Syx8, aux, EndoA, Nrx-1, AP-1sigma, Miro, CDase, Syt7, Chro, Liprin-alpha, lap, alphaSnap, cno, aPKC, AP-2alpha, Exo84, btsz, Syx7	RhoGAP100F, par-1, Fife
cluster_5	1	GO:0030534	adult behavior	BP	90	32	14.49	2.2	1.1	4.3e-06	5.2e-05	ben, Pka-C1, dnc, eag, fliI, Galphas, dlg1, Lam, rut, sesB, Sh, vap, Pp1-87B, Galphaq, Syn, ple, Tbh, Nmdar1, Arf51F, CASK, stnA, homer, Eb1, Akap200, trsn, CG3967, Tk, kuk, brp, norpA, SERCA, Hk
cluster_5	1	GO:0051493	regulation of cytoskeleton organization	BP	75	27	12.07	2.2	1.2	1.9e-05	0.00017	Gbeta13F, spir, Btk29A, mys, Cdc42, LamC, jar, Arp2, Abi, chb, gek, RhoGEF2, Ocrl, WASp, DAAM, Arpc2, Cip4, RhoGAP68F, CG17816, RhoGAP92B, atl, SCAR, Jupiter, tum, beta-Spec, Patronin, nwk
cluster_5	1	GO:0044089	positive regulation of cellular component biogenesis	BP	64	23	10.3	2.2	1.2	8e-05	0.00055	dlg1, spir, Su(var)205, TfIIFalpha, Rac1, Cdc42, TfIIFbeta, simj, Arp2, WASp, trio, Bap60, DAAM, Arpc2, Cip4, RhoGAP68F, Abp1, RhoGAP92B, SCAR, Pak3, Jupiter, sif, aPKC
cluster_5	2	GO:0007409	axonogenesis	BP	157	53	25.27	2.1	1.1	2.2e-08	5.9e-07	ben, brm, bsk, bur, Dab, dnc, DCTN1-p150, Sos, LanA, pbl, rut, Scm, Sh, trx, Pp1-87B, Nrt, Galphaq, mys, hep, Rac1, Cdc42, dock, Hem, Rac2, spen, Abi, chb, AMPKalpha, RhoGEF2, WASp, trio, DAAM, RhoGAPp190, Ulp1, CdGAPr, Dscam1, enok, Strip, Wnk, Sra-1, RhoGAP93B, AP-1sigma, RhoGAP100F, Vav, SCAR, Liprin-alpha, Trim9, Mical, sif, beta-Spec, hts, Nrg, kis	Pten
cluster_5	2	GO:0032940	secretion by cell	BP	153	51	24.63	2.1	1	6.6e-08	1.5e-06	comt, rb, Syb, Csp, Syt1, Rop, Syn, Gdi, Rab3, CanB, AP-1-2beta, jar, Snap25, nSyb, Syx1A, Arf51F, CASK, CanB2, stnB, stnA, Dap160, Clc, AP-1mu, SPARC, Madm, Pgant3, GABA-B-R2, Syt4, Tomosyn, Frq1, Hrs, Synj, Syx17, Syx8, Snx3, EndoA, RhoGAP92B, AP-1sigma, CDase, Syt7, Frq2, lap, Rab26, alphaSnap, brp, Dys, Exn, Fife, AP-2alpha, Exo84, Syx7
cluster_5	1	GO:0050808	synapse organization	BP	145	48	23.34	2.1	1	2.1e-07	4.1e-06	Appl, ben, Galphao, Galphas, dlg1, LanA, rut, sesB, Gad1, Syn, Rab3, Rac1, Cdc42, simj, Arp2, Hem, CASK, RtGEF, Abi, Dap160, WASp, trio, Frq1, Synj, Cip4, RhoGAP68F, Abp1, Sra-1, RhoGAP92B, Nrx-1, atl, veli, RhoGAP100F, Prosap, Pak3, Liprin-alpha, Mical, Frq2, beta-Spec, brp, par-1, aPKC, AGO1, nwk, CaMKII, Nrg, kis, PI4KIIIalpha
cluster_5	2	GO:0050890	cognition	BP	96	33	15.45	2.1	1.1	7e-06	7.9e-05	Appl, bsk, Pka-C1, dnc, eag, Galphas, Hn, Rab32, rut, Sh, Btk29A, Pp1-87B, Gad1, Syn, drk, svr, Tbh, Nmdar1, simj, Sap47, CASK, Tomosyn, Nrx-1, PQBP1, G9a, Rbfox1, sra, brp, aPKC, AGO1, CaMKII, rad, kis
cluster_5	1	GO:0007015	actin filament organization	BP	109	36	17.55	2.1	1	7.7e-06	8.3e-05	Gbeta13F, gro, Sos, spir, Btk29A, mts, drk, mys, hep, Rac1, Cdc42, LamC, jar, Arp2, Rac2, gek, RhoGEF2, WASp, DAAM, Pten, Ced-12, Arpc2, Cip4, RhoGAP68F, RhoGAP92B, PIP4K, Vav, SCAR, Pak3, Mical, par-1, rdgA, hts, nwk, btsz, PI4KIIIalpha
cluster_5	1	GO:0008289	lipid binding	MF	94	32	15.13	2.1	1.1	1.2e-05	0.00012	ninaC, pbl, Pkc53E, Syt1, inaC, gek, RhoGEF2, rush, drpr, Syt4, RhoGAP5A, snz, Graf, Cip4, Abp1, CG8176, Snx3, EndoA, RhoGAP92B, Npc2g, Syt7, Vav, Asap, Efa6, tum, lap, Vps36, apolpp, beta-Spec, rdgA, nwk, CG43729
cluster_5	1	GO:0007416	synapse assembly	BP	100	33	16.1	2.1	1	1.9e-05	0.00017	ben, Galphao, dlg1, LanA, sesB, Gad1, Syn, Rac1, Cdc42, simj, Arp2, CASK, Dap160, WASp, trio, Cip4, RhoGAP68F, Abp1, RhoGAP92B, Nrx-1, atl, veli, Prosap, Pak3, Liprin-alpha, Mical, par-1, aPKC, AGO1, nwk, CaMKII, kis, PI4KIIIalpha
cluster_5	1	GO:0098797	plasma membrane protein complex	CC	86	29	13.84	2.1	1.1	3.8e-05	0.00029	nAChRbeta1, eag, Gbeta13F, Galphao, Galphas, inaD, ninaC, Sh, Galphaq, GluRIA, Gbeta76C, mys, inaC, alpha-Cat, AP-1-2beta, Nmdar1, nrv1, Clc, GABA-B-R2, VhaSFD, Gbeta5, Dyb, NaCP60E, Dys, GABA-B-R1, Vha44, norpA, Hk, AP-2alpha
cluster_5	1	GO:0016049	cell growth	BP	82	28	13.2	2.1	1.1	4e-05	0.0003	bsk, dnc, eag, DCTN1-p150, rut, Sh, hep, Rac1, Cdc42, Hem, Rac2, Abi, AMPKalpha, RhoGEF2, trio, DAAM, Pten, hfp, CG9328, Dscam1, Strip, RhoGAP100F, PIP4K, SCAR, Liprin-alpha, bun, cno, Nrg
cluster_5	2	GO:0043087	regulation of GTPase activity	BP	52	18	8.37	2.1	1.1	0.00079	0.0037	pbl, RanGAP, vap, mbc, RtGEF, Ocrl, Rlip, RhoGAP5A, Ced-12, CG7324, RhoGAP92B, RhoGAP93B, RhoGAP100F, conu, Vav, Asap, sif, Evi5	bur, Galphaq, Gbeta76C, SERCA
cluster_5	2	GO:0045216	cell-cell junction organization	BP	52	18	8.37	2.1	1.1	0.00079	0.0037	Galphao, dlg1, alpha-Cat, Rac1, cora, jar, Rac2, sns, Pten, RhoGAP5A, Cip4, Cont, Vav, vari, aPKC, pyd, Nrg, btsz
cluster_5	2	GO:0045471	response to ethanol	BP	52	18	8.37	2.1	1.1	0.00079	0.0037	Pka-C1, dnc, dlg1, rut, vap, Syn, inaC, Tbh, Nmdar1, Arf51F, CASK, homer, Akap200, Jwa, Drat, Balat, CG3967, whd	E(bx), rept, G9a, pzg
cluster_5	1	GO:0060627	regulation of vesicle-mediated transport	BP	57	19	9.18	2.1	1	0.00097	0.0043	Pkc53E, vap, Syt1, inaC, jar, Syx1A, CASK, stnB, AP-1mu, GABA-B-R2, drpr, Syt4, RhoGAP68F, Nrx-1, lap, Rab26, norpA, AP-2alpha, Syx7
cluster_5	1	GO:0007525	somatic muscle development	BP	44	15	7.08	2.1	1.1	0.0025	0.0096	fliI, Pfk, cora, Pglym78, chn, EloB, Pten, CG8578, lid, Mical, Unc-89, tum, Pgk, Alh, hts
cluster_5	2	GO:0008355	olfactory learning	BP	39	13	6.28	2.1	1	0.006	0.02	Pka-C1, dnc, Rab32, rut, Pp1-87B, Gad1, Syn, drk, Nmdar1, PQBP1, sra, AGO1, rad	Sap47, Nrx-1
cluster_5	1	GO:0005769	early endosome	CC	29	10	4.67	2.1	1.1	0.012	0.036	Arf51F, Ocrl, rush, Hrs, Rbpn-5, RhoGAP68F, Snx3, CG6607, Vps2, Syx7
cluster_5	1	GO:0045746	negative regulation of Notch signaling pathway	BP	26	9	4.19	2.1	1.1	0.016	0.044	Su(dx), Dap160, AP-1mu, O-fut1, Vps2, krz, shrb, bun, Vps4
cluster_5	1	GO:0042995	cell projection	CC	153	49	24.63	2	0.99	4.9e-07	8.1e-06	Arr1, Arr2, bsk, Pka-C1, comt, Dab, inaD, dlg1, ninaC, Csp, Syt1, Galphaq, Rop, Syn, Gbeta76C, mys, inaC, hep, Rac1, Cdc42, jar, Snap25, nSyb, Syx1A, mbc, Past1, Abi, chb, gek, WASp, trio, DAAM, homer, Eaat1, Dscam1, Synj, Abp1, Pak3, Mical, beta-Spec, alphaSnap, par-1, kcc, pyd, norpA, CaMKII, Nrg, rad, tau
cluster_5	1	GO:0060249	anatomical structure homeostasis	BP	83	27	13.36	2	1	0.00014	0.00092	Arr1, Arr2, comt, ninaA, ninaC, peb, sesB, Su(var)205, Csp, Galphaq, mys, woc, chn, Rack1, vimar, Srp54, Syx17, CDase, Gyf, mib2, Pgk, Dys, alc, rdgA, norpA, hts, rdgC
cluster_5	2	GO:0043085	positive regulation of catalytic activity	BP	68	22	10.95	2	1	0.00063	0.0031	Galphas, pbl, RanGAP, vap, Galphaq, Gbeta76C, hep, Rac1, mbc, RtGEF, Abi, Pdf, Dap160, Rlip, RhoGAP5A, Ced-12, RhoGAP92B, RhoGAP93B, RhoGAP100F, conu, Vav, SERCA	Pka-C1
cluster_5	1	GO:0007613	memory	BP	64	21	10.3	2	1	0.00068	0.0033	Appl, bsk, Pka-C1, dnc, Hn, rut, Syn, drk, svr, Tbh, Nmdar1, CASK, Tomosyn, G9a, Rbfox1, sra, brp, aPKC, CaMKII, rad, kis
cluster_5	1	GO:0042440	pigment metabolic process	BP	65	21	10.46	2	1	0.00085	0.0039	bsk, DCTN1-p150, Hn, LanA, Rab32, ninaA, rb, hep, Rac1, Cdc42, Rac2, Pten, Eb1, RhoBTB, Vav, se, Exn, rdgA, aPKC, RhoGEF3, Nrg
cluster_5	1	GO:1901615	organic hydroxy compound metabolic process	BP	58	19	9.34	2	1	0.0012	0.0053	bsk, DCTN1-p150, LanA, ple, hep, woc, Tbh, Rac1, Cdc42, Rac2, Pten, Eb1, RhoBTB, Vav, 5PtaseI, Exn, aPKC, RhoGEF3, Nrg
cluster_5	1	GO:0002252	immune effector process	BP	57	18	9.18	2	0.97	0.0026	0.0098	DCTN1-p150, LanA, Rac1, Cdc42, Rac2, Pten, Eb1, CG10333, casp, DMAP1, RhoBTB, CG9636, Vav, G9a, Exn, aPKC, RhoGEF3, Nrg
cluster_5	1	GO:0000122	negative regulation of transcription by RNA polymerase II	BP	49	16	7.89	2	1	0.0031	0.011	gro, TH1, simj, chn, Rbf, Max, mip130, NELF-B, mip120, mip40, NC2alpha, MEP-1, pad, Nelf-A, Spt5, kis
cluster_5	5	GO:0045475	locomotor rhythm	BP	34	11	5.47	2	1	0.014	0.04	Pka-C1, dnc, dlg1, Rac1, Fer2LCH, Pdf, qsm, lid, unc79, gw, sxc	Sh, homer, Hk, nocte, norpA
cluster_5	1	GO:0044451	nucleoplasm part	CC	166	52	26.72	1.9	0.96	4.7e-07	8.1e-06	dre4, RpII18, trx, Hrb87F, Cyp1, B52, RpII15, Taf4, TfIIFalpha, Taf1, TH1, TfIIFbeta, atms, simj, Atu, dom, qkr58E-3, EloB, Cpsf160, RpII33, NELF-B, Cpsf100, CG15356, CG3756, lid, Wdr82, Ing5, Rpb11, Rpb5, cbc, DMAP1, NC2alpha, Rtf1, enok, MEP-1, CG7185, CG3689, Rpb8, Nelf-A, EloA, Rpb10, rept, Spt5, Rpb7, elav, SmB, RpII140, sqd, Pcf11, SC35, rump, HnRNP-K
cluster_5	2	GO:0030036	actin cytoskeleton organization	BP	176	54	28.33	1.9	0.93	5.9e-07	9.4e-06	fliI, Gbeta13F, Galphao, gro, Sos, pbl, spir, Btk29A, mts, drk, mys, hep, Rac1, Cdc42, LamC, jar, Arp2, Hem, CalpA, Arf51F, Rac2, mbc, CanB2, Abi, gek, RhoGEF2, Ocrl, sns, WASp, trio, DAAM, Pten, Ced-12, Arpc2, Cip4, RhoGAP68F, Sra-1, RhoGAP92B, PIP4K, Vav, SCAR, Pak3, CG32264, Mical, Unc-89, sif, par-1, Ppcs, rdgA, hts, nwk, btsz, PI4KIIIalpha, Vps4
cluster_5	1	GO:0042330	taxis	BP	163	51	26.24	1.9	0.96	6.4e-07	9.9e-06	brm, bsk, bur, Dab, dlg1, Sos, LanA, trx, Pp1-87B, Nrt, nonA, Galphaq, mys, ple, hep, Rac1, Cdc42, Nmdar1, dock, spen, dom, Abi, chb, AMPKalpha, Pdf, trio, DAAM, Nup205, CdGAPr, Dscam1, enok, Wnk, Sra-1, RhoGAP93B, AP-1sigma, CG6330, RhoGAP100F, Vav, SCAR, Liprin-alpha, Trim9, Mical, CG34353, lap, beta-Spec, rdgA, norpA, hts, Nrg, rdgC, kis
cluster_5	1	GO:0003729	mRNA binding	MF	142	43	22.86	1.9	0.91	1.3e-05	0.00013	swm, snf, Su(var)205, tra2, nonA, Hrb87F, B52, Pabp2, TH1, Ref1, heph, Psi, rin, Spx, snRNP-U1-70K, U2af38, Cbp20, qkr58E-3, qkr58E-1, qkr54B, vig, Srp54, Neos, Cpsf160, Cpsf100, x16, hfp, CG4887, CG4896, U2A, CG7185, CG3689, RnpS1, CG7903, CG30122, LSm3, Rbfox1, Vps36, elav, sqd, SC35, rump, HnRNP-K
cluster_5	1	GO:0061061	muscle structure development	BP	134	41	21.57	1.9	0.93	1.5e-05	0.00015	brm, fliI, flw, Pfk, mys, Taf4, Rac1, LamC, cora, dock, Hem, CalpA, Arf51F, Rac2, Pglym78, chn, mbc, CanB2, Abi, SmD3, EloB, sns, WASp, Bap60, DAAM, Pten, CG8578, lid, Ced-12, Vav, SCAR, Pak3, Mical, Unc-89, tum, mib2, Pgk, Dys, Alh, LanB1, hts
cluster_5	4	GO:0009968	negative regulation of signal transduction	BP	132	40	21.25	1.9	0.91	2.5e-05	0.00021	Arr1, Arr2, bsk, Pka-C1, E(bx), flw, gro, swm, pbl, peb, Su(dx), vap, Galphaq, drk, dock, CalpA, chb, AMPKalpha, Dap160, AP-1mu, Pli, Pten, Ulp1, Akap200, Hrs, O-fut1, casp, Vps20, UbcE2M, Chmp1, Irk2, RanBP3, Vps2, Vav, krz, tum, shrb, bun, pzg, Vps4	GABA-B-R2, Lam, Csp, CG9636, Egm
cluster_5	3	GO:0007411	axon guidance	BP	123	37	19.8	1.9	0.9	6e-05	0.00043	bsk, bur, Dab, Sos, LanA, trx, Pp1-87B, Nrt, Galphaq, mys, hep, Rac1, Cdc42, dock, spen, Abi, chb, AMPKalpha, trio, DAAM, CdGAPr, Dscam1, enok, Wnk, Sra-1, RhoGAP93B, AP-1sigma, RhoGAP100F, Vav, SCAR, Liprin-alpha, Trim9, Mical, beta-Spec, hts, Nrg, kis	brm, dom
cluster_5	1	GO:0007528	neuromuscular junction development	BP	107	33	17.22	1.9	0.94	8.8e-05	0.0006	ben, Galphao, Galphas, dlg1, LanA, rut, sesB, Gad1, Syn, Cdc42, simj, Arp2, Hem, CASK, Abi, Dap160, WASp, trio, Frq1, Cip4, RhoGAP68F, Abp1, RhoGAP92B, Nrx-1, atl, veli, Liprin-alpha, Frq2, par-1, nwk, CaMKII, kis, PI4KIIIalpha
cluster_5	1	GO:0050803	regulation of synapse structure or activity	BP	103	31	16.58	1.9	0.9	0.00023	0.0014	Galphao, dlg1, LanA, Sh, Syt1, Rac1, Cdc42, simj, Arp2, CASK, RtGEF, WASp, trio, Synj, Cip4, RhoGAP68F, Abp1, Sra-1, EndoA, RhoGAP92B, KaiR1D, Nrx-1, atl, veli, Pak3, sif, beta-Spec, nwk, CaMKII, kis, PI4KIIIalpha
cluster_5	1	GO:0051124	synaptic growth at neuromuscular junction	BP	86	26	13.84	1.9	0.91	0.00068	0.0033	ben, Galphao, dlg1, LanA, sesB, Syn, Cdc42, simj, Arp2, CASK, Dap160, WASp, trio, Cip4, RhoGAP68F, Abp1, RhoGAP92B, Nrx-1, atl, veli, Liprin-alpha, par-1, nwk, CaMKII, kis, PI4KIIIalpha
cluster_5	1	GO:0045087	innate immune response	BP	87	26	14	1.9	0.89	0.00083	0.0039	brm, bsk, E(bx), DCTN1-p150, LanA, Pp1alpha-96A, hep, Rac1, Cdc42, mtd, Rac2, Fer2LCH, Pten, Eb1, Tollo, RluA-2, DMAP1, RhoBTB, Npc2g, Vav, CG32795, Exn, LanB1, aPKC, RhoGEF3, Nrg
cluster_5	1	GO:0061695	transferase complex, transferring phosphorus-containing groups	CC	76	23	12.23	1.9	0.91	0.0014	0.0058	Pka-C1, Pfk, RpII18, Cyp1, RpII15, Taf4, TfIIFalpha, Taf1, TfIIFbeta, atms, Atu, Pi3K21B, AMPKalpha, RpII33, CG3756, Rpb11, Rpb5, Rtf1, Rpb8, Rpb10, Rpb7, alc, RpII140
cluster_5	1	GO:0032101	regulation of response to external stimulus	BP	64	20	10.3	1.9	0.96	0.0018	0.0071	Arr1, Arr2, inaD, ninaC, Galphaq, Gbeta76C, inaC, Rac1, Pli, Pten, Ulp1, CG10333, casp, DMAP1, krz, G9a, Liprin-alpha, rdgA, norpA, rdgC
cluster_5	1	GO:0010638	positive regulation of organelle organization	BP	46	14	7.4	1.9	0.92	0.011	0.033	spir, Su(var)205, Syt1, Arp2, Abi, WASp, Bap60, DAAM, Syt4, Arpc2, Cip4, SCAR, Jupiter, Opa1
cluster_5	1	GO:0030010	establishment of cell polarity	BP	39	12	6.28	1.9	0.93	0.016	0.044	Gbeta13F, DCTN1-p150, dlg1, mts, Rac1, Cdc42, htt, cno, Dys, par-1, aPKC, PI4KIIIalpha
cluster_5	2	GO:0046579	positive regulation of Ras protein signal transduction	BP	39	12	6.28	1.9	0.93	0.016	0.044	Sos, Pp1-87B, Cdc37, RhoGEF2, trio, CG10188, Strip, Sf3a2, CG7483, CG4849, Exn, CG43102
cluster_5	5	GO:0022836	gated channel activity	MF	39	12	6.28	1.9	0.93	0.016	0.044	nAChRbeta1, eag, Grd, Sh, GluRIA, Lcch3, Nmdar1, CG15270, KaiR1D, Irk2, NaCP60E, Hk	brp, CG3638, ogre, Inx2
cluster_5	2	GO:0023051	regulation of signaling	BP	403	115	64.87	1.8	0.83	2e-11	1.2e-09	Arr1, Arr2, ben, brm, bsk, Pka-C1, comt, dnc, E(bx), flw, gro, inaD, Sos, swm, ninaC, pbl, peb, Pp1alpha-96A, rut, Sh, Su(dx), vap, Pp1-87B, mts, Csp, Syt1, Galphaq, Gbeta76C, drk, inaC, hep, Taf1, dock, Snap25, Cdc37, CalpA, Sap47, CASK, RtGEF, spen, dom, chb, AMPKalpha, RhoGEF2, Dap160, Rbcn-3A, trio, AP-1mu, Pli, Rlip, Pten, Eaat1, GABA-B-R2, Ulp1, Akap200, Syt4, RhoGAP5A, Tomosyn, Frq1, Hrs, …
cluster_5	1	GO:0035556	intracellular signal transduction	BP	317	93	51.03	1.8	0.87	4.7e-10	2.2e-08	ben, brm, bsk, Pka-C1, dnc, eag, E(bx), flw, Galphao, Sos, Rab32, ninaA, pbl, peb, Pkc53E, rut, Btk29A, vap, Pp1-87B, drk, inaC, Ac76E, Gdi, Rab3, hep, Rac1, Cdc42, Taf1, Cdc37, Dp, Arf51F, Gycbeta100B, Rac2, mbc, rin, Rab10, Rbf, RtGEF, Lgr1, chb, Ac13E, gek, AMPKalpha, RhoGEF2, Ac78C, trio, Rlip, RhoGAPp190, Pten, Akap200, RhoGAP5A, Graf, lid, CG10188, CdGAPr, enok, Nplp1, Strip, RhoGAP68F, Sf3…
cluster_5	1	GO:0007610	behavior	BP	303	89	48.78	1.8	0.87	1.1e-09	4.8e-08	Appl, ben, bsk, Pka-C1, comt, dnc, eag, fliI, Galphas, Hn, dlg1, Lam, LanA, Rab32, px, rut, sesB, Sh, Btk29A, vap, Pp1-87B, Csp, nonA, Syt1, Galphaq, Gad1, Syn, drk, ogre, svr, ple, Tbh, Rac1, Nmdar1, simj, Spn, CalpA, Sap47, Arf51F, CASK, Rac2, Fer2LCH, stnA, Rack1, Pdf, SF1, homer, Eaat1, SPARC, l(1)G0007, Eb1, Inx2, GABA-B-R2, drpr, Akap200, qsm, Tomosyn, lid, trsn, CG3967, Tk, kuk, unc79, Nrx…
cluster_5	2	GO:0048667	cell morphogenesis involved in neuron differentiation	BP	236	68	37.99	1.8	0.84	2.8e-07	5.4e-06	ben, brm, bsk, bur, Dab, dnc, E(bx), DCTN1-p150, gro, Sos, LanA, pbl, peb, rut, Scm, Sh, trx, Pp1-87B, Nrt, Galphaq, fs(1)h, mys, Taf4, hep, Rac1, Cdc42, dock, Hem, Rac2, chn, spen, dom, Abi, chb, AMPKalpha, RhoGEF2, WASp, trio, Bap60, DAAM, RhoGAPp190, jim, Ulp1, CdGAPr, Dscam1, enok, MEP-1, Strip, Wnk, Sra-1, RhoGAP93B, AP-1sigma, RhoGAP100F, Vav, SMC1, G9a, SCAR, Liprin-alpha, Trim9, Mical, si…	Sce, Vps20, Ppcs, LanB1, aPKC
cluster_5	1	GO:0048589	developmental growth	BP	213	61	34.29	1.8	0.83	1.5e-06	2.2e-05	ben, bsk, dnc, eag, DCTN1-p150, Galphao, dlg1, LanA, rut, sesB, Sh, Syn, mys, Ac76E, hep, Rac1, Cdc42, simj, Arp2, Hem, CASK, Rac2, rin, Rab10, RtGEF, pcm, Abi, Pi3K21B, RhoGEF2, Dap160, WASp, trio, DAAM, Pten, Tollo, Dscam1, Strip, Cip4, RhoGAP68F, Abp1, RhoGAP92B, Nrx-1, atl, veli, RhoGAP100F, PIP4K, SCAR, Liprin-alpha, vari, alphaSnap, bun, cno, par-1, nwk, CaMKII, Nrg, kis, btsz, PI4KIIIalpha…
cluster_5	1	GO:0009628	response to abiotic stimulus	BP	201	57	32.36	1.8	0.82	4.8e-06	5.8e-05	Appl, Arr1, Arr2, bsk, Pka-C1, dnc, Galphas, Hsp27, Hsp67Ba, Hsp67Bc, inaD, dlg1, ninaA, ninaC, rut, sesB, Sh, Pp1-87B, mts, nonA, Hrb87F, Galphaq, Gad1, Rop, Syn, Gbeta76C, ogre, inaC, ple, hep, Nmdar1, Hsp60A, chn, stnA, Trxr-1, AMPKalpha, Pdf, Srp54, RpII33, Kap-alpha3, GABA-B-R2, Ulp1, Nup205, tho2, Dscam1, Drat, Synj, CG6330, CG34353, lap, Opa1, rdgA, nocte, kcc, mub, norpA, rdgC
cluster_5	1	GO:0044087	regulation of cellular component biogenesis	BP	171	50	27.53	1.8	0.86	7.4e-06	8.2e-05	Pka-C1, Galphao, dlg1, LanA, spir, Btk29A, Su(var)205, Syt1, Rop, B52, mys, TfIIFalpha, Rac1, Cdc42, LamC, TfIIFbeta, simj, Arp2, Syx1A, CASK, pcm, Ocrl, WASp, trio, Srp54, Bap60, DAAM, Pten, x16, Arpc2, NC2alpha, Cip4, RhoGAP68F, Abp1, CG17816, RhoGAP92B, atl, veli, SCAR, Pak3, Jupiter, sif, beta-Spec, par-1, aPKC, nwk, CaMKII, SC35, kis, PI4KIIIalpha
cluster_5	1	GO:0061024	membrane organization	BP	144	42	23.18	1.8	0.86	4.3e-05	0.00032	bsk, comt, Lam, rb, Syt1, hep, Cdc42, AP-1-2beta, LamC, cora, Nup214, jar, Snap25, nSyb, Syx1A, stnB, WASp, Clc, AP-1mu, GABA-B-R2, drpr, Syt4, p47, Cip4, Syx8, Vps24, CG2023, EndoA, AP-1sigma, Miro, atl, CDase, lap, beta-Spec, alphaSnap, Opa1, aPKC, AP-2alpha, Vamp7, Exo84, PI4KIIIalpha, Syx7
cluster_5	1	GO:0031982	vesicle	CC	137	39	22.05	1.8	0.82	0.00014	0.00093	comt, Rab32, ninaA, rb, Syb, Csp, Syt1, Rop, Syn, Gdi, Rab3, CanB, AP-1-2beta, jar, nSyb, Syx1A, CanB2, Rab10, stnB, stnA, Dap160, Clc, AP-1mu, Syt4, Tomosyn, Hrs, O-fut1, Synj, Cip4, AP-1sigma, Syt7, Frq2, lap, Rab26, apolpp, alphaSnap, Vmat, Evi5, AP-2alpha
cluster_5	1	GO:0007163	establishment or maintenance of cell polarity	BP	127	36	20.44	1.8	0.82	0.00028	0.0017	Pka-C1, Gbeta13F, DCTN1-p150, dlg1, peb, mts, alpha-Cat, Rac1, Cdc42, cora, heph, Dp, CASK, rin, chb, AMPKalpha, Eb1, htt, prc, sds22, Tomosyn, Cont, veli, btz, cno, Dys, par-1, alc, aPKC, pyd, sqd, Sgt1, Exo84, PI4KIIIalpha, Syx7, Vps4
cluster_5	2	GO:0032535	regulation of cellular component size	BP	91	26	14.65	1.8	0.83	0.0017	0.0069	pbl, spir, Btk29A, Rac1, Cdc42, LamC, Arp2, Rbf, Rack1, Pi3K21B, gek, AMPKalpha, WASp, DAAM, RhoGAPp190, Pten, Madm, Arpc2, Rbpn-5, Cip4, RhoGAP92B, SCAR, Liprin-alpha, nwk, CG43729, btsz	cora, vari, Nrg
cluster_5	4	GO:0008582	regulation of synaptic growth at neuromuscular junction	BP	69	20	11.11	1.8	0.85	0.0047	0.016	Galphao, dlg1, LanA, Cdc42, simj, Arp2, CASK, WASp, trio, Cip4, RhoGAP68F, Abp1, RhoGAP92B, atl, veli, beta-Spec, nwk, CaMKII, kis, PI4KIIIalpha	Rac1, RtGEF, Sra-1, Nrx-1, Pak3
cluster_5	1	GO:0009266	response to temperature stimulus	BP	69	20	11.11	1.8	0.85	0.0047	0.016	bsk, Pka-C1, dnc, Hsp27, Hsp67Ba, Hsp67Bc, rut, Hrb87F, Galphaq, Syn, ple, hep, Hsp60A, RpII33, tho2, rdgA, nocte, mub, norpA, rdgC
cluster_5	1	GO:0051962	positive regulation of nervous system development	BP	58	17	9.34	1.8	0.86	0.0079	0.025	bsk, dlg1, pbl, Rop, drk, Rac1, simj, Arp2, Dap160, trio, RhoGAP68F, Abp1, RhoGAP92B, G9a, Pak3, bun, aPKC
cluster_5	2	GO:0008037	cell recognition	BP	49	14	7.89	1.8	0.83	0.019	0.05	Sos, pbl, Nrt, Galphaq, hig, Rac1, gek, WASp, RhoGAPp190, Dscam1, RhoGAP93B, SCAR, Trim9, beta-Spec
cluster_5	1	GO:0009966	regulation of signal transduction	BP	350	96	56.34	1.7	0.77	1.2e-08	3.8e-07	Arr1, Arr2, ben, brm, bsk, Pka-C1, dnc, E(bx), flw, gro, inaD, Sos, swm, ninaC, pbl, peb, Pp1alpha-96A, rut, Su(dx), vap, Pp1-87B, mts, Galphaq, Gbeta76C, drk, inaC, hep, Taf1, dock, Cdc37, CalpA, RtGEF, spen, dom, chb, AMPKalpha, RhoGEF2, Dap160, Rbcn-3A, trio, AP-1mu, Pli, Rlip, Pten, Eaat1, Ulp1, Akap200, RhoGAP5A, Hrs, lid, CG4972, holn1, CG10188, O-fut1, casp, Rtf1, Vps20, enok, Nplp1, Strip…
cluster_5	1	GO:0007267	cell-cell signaling	BP	341	94	54.89	1.7	0.78	1.4e-08	3.9e-07	nAChRbeta1, bsk, Pka-C1, comt, dnc, E(bx), fl(2)d, flw, Galphao, Galphas, gro, dlg1, Lam, pbl, Pp1alpha-96A, rut, sesB, Sh, Syb, Pp1-87B, mts, Csp, Syt1, Galphaq, Rop, Syn, Gdi, Rab3, CanB, Cdc42, AP-1-2beta, NAT1, Snap25, Sap47, nSyb, Syx1A, Arf51F, CASK, Rac2, CanB2, Rab10, stnB, stnA, spen, Dap160, trio, Clc, AP-1mu, Eaat1, GABA-B-R2, Syt4, Tomosyn, Frq1, Hrs, Arpc2, O-fut1, Synj, Syx17, Syx8,…
cluster_5	1	GO:0016192	vesicle-mediated transport	BP	372	100	59.88	1.7	0.74	1.9e-08	5.1e-07	Arr1, brm, bsk, comt, Dab, DCTN1-p150, Hn, Rab32, Pkc53E, rb, sesB, spir, Su(dx), Syb, vap, Pp1-87B, mts, Csp, Syt1, Galphaq, Rop, Syn, svr, inaC, Gdi, Rab3, CanB, hep, Rac1, Cdc42, AP-1-2beta, jar, Snap25, Hem, CalpA, nSyb, Syx1A, Arf51F, CASK, Rac2, CanB2, Rab10, Past1, stnB, stnA, Abi, AMPKalpha, Dap160, Ocrl, WASp, Clc, AP-1mu, rush, Rlip, Madm, GABA-B-R2, drpr, htt, Syt4, Tomosyn, Hrs, holn1…
cluster_5	1	GO:0040011	locomotion	BP	305	83	49.1	1.7	0.76	2e-07	4.1e-06	brm, bsk, bur, comt, Dab, Gbeta13F, Hex-A, dlg1, Sos, LanA, mod(mdg4), pbl, sesB, trx, Pp1-87B, Nrt, Csp, nonA, Galphaq, mys, inaC, ple, hep, Tbh, Rac1, Cdc42, Nmdar1, dock, jar, Hem, CASK, Rac2, mbc, spen, stumps, dom, Abi, chb, AMPKalpha, Pdf, trio, Fpps, DAAM, homer, Pten, prc, CG11178, Nup205, Hrs, Ced-12, CdGAPr, Dscam1, mip120, enok, Wnk, Sra-1, RhoGAP93B, Nrx-1, AP-1sigma, sosie, veli, CG6…
cluster_5	4	GO:0048812	neuron projection morphogenesis	BP	283	76	45.56	1.7	0.74	1.2e-06	1.8e-05	Appl, ben, brm, bsk, bur, Dab, dnc, E(bx), Eip71CD, DCTN1-p150, gro, Sos, LanA, pbl, rut, Scm, Sh, trx, Pp1-87B, Nrt, Galphaq, fs(1)h, mys, Taf4, hep, Rac1, Cdc42, dock, Hem, Rac2, chn, spen, dom, Abi, chb, AMPKalpha, RhoGEF2, WASp, trio, CG11448, rush, Bap60, DAAM, RhoGAPp190, jim, Ulp1, htt, CdGAPr, Dscam1, enok, MEP-1, Strip, Wnk, Sra-1, RhoGAP93B, Irk2, AP-1sigma, RhoGAP100F, Vav, SMC1, G9a, …	Rop, Pten, Patronin, CG14367, Opa1
cluster_5	1	GO:0006897	endocytosis	BP	232	65	37.35	1.7	0.8	1.6e-06	2.2e-05	Arr1, brm, bsk, comt, Dab, Hn, Pkc53E, rb, Su(dx), vap, Pp1-87B, mts, Csp, Syt1, Galphaq, svr, inaC, hep, Rac1, Cdc42, AP-1-2beta, Hem, CalpA, Arf51F, CASK, Rac2, Past1, stnB, stnA, Abi, AMPKalpha, Dap160, Ocrl, WASp, Clc, AP-1mu, rush, Rlip, drpr, Hrs, holn1, Dscam1, O-fut1, Nup62, DMAP1, Synj, aux, Vps24, CG8176, Snx3, Sra-1, EndoA, Nrx-1, AP-1sigma, SCAR, LpR1, lap, alphaSnap, Pp2A-29B, CG3638…
cluster_5	1	GO:0044459	plasma membrane part	CC	221	62	35.58	1.7	0.8	2.7e-06	3.5e-05	nAChRbeta1, eag, Gbeta13F, Galphao, Galphas, inaD, dlg1, Sos, LanA, ninaA, ninaC, rut, Sh, Nrt, Galphaq, GluRIA, Gbeta76C, ogre, mys, inaC, alpha-Cat, Rac1, AP-1-2beta, Nmdar1, mbc, nrv1, Lgr1, Abi, RhoGEF2, Dap160, trio, Clc, Inx2, GABA-B-R2, VhaSFD, Syt4, Gbeta5, Dscam1, Dyb, sosie, veli, Dop2R, NaCP60E, Rab26, vari, beta-Spec, brp, Dys, GABA-B-R1, par-1, Exn, CG42748, aPKC, Vha44, pyd, norpA, …
cluster_5	1	GO:0005654	nucleoplasm	CC	231	63	37.19	1.7	0.76	6.2e-06	7.2e-05	dre4, pbl, px, RpII18, trx, mts, Hrb87F, Cyp1, B52, drk, RpII15, Taf4, TfIIFalpha, Taf1, TH1, TfIIFbeta, atms, simj, Ref1, Atu, dom, qkr58E-3, EloB, Cpsf160, RpII33, Dek, NELF-B, Cpsf100, CG4896, CG15356, CG3756, lid, Wdr82, Ing5, Rpb11, Rpb5, cbc, DMAP1, NC2alpha, Rtf1, enok, MEP-1, CG7185, CG3689, Rpb8, CG9636, RnpS1, Nelf-A, EloA, Rpb10, rept, Spt5, Rpb7, Rbfox1, elav, SmB, RpII140, sqd, Pcf11…
cluster_5	1	GO:0098772	molecular function regulator	MF	199	54	32.03	1.7	0.75	3.5e-05	0.00027	bur, Sos, pbl, RanGAP, vap, mts, Cyp1, Gdi, CanB, Cdc37, mbc, CanB2, RtGEF, Pi3K21B, RhoGEF2, Ocrl, trio, Pli, Rlip, RhoGAPp190, sds22, CG3626, RhoGAP5A, Graf, Frq1, CG10188, CdGAPr, CG17739, Nplp1, CG7394, RhoGAP68F, RhoGDI, CG7324, RhoGAP92B, RhoGAP93B, RhoGAP100F, conu, Vav, Asap, Efa6, Unc-89, Epac, sif, tum, alphaSnap, Pp2A-29B, Exn, CG43102, norpA, Evi5, Hk, RhoGEF3, Cdep, rad
cluster_5	1	GO:1902531	regulation of intracellular signal transduction	BP	173	48	27.85	1.7	0.79	5.2e-05	0.00038	ben, bsk, dnc, E(bx), flw, Sos, pbl, peb, rut, vap, Pp1-87B, drk, hep, Taf1, Cdc37, RtGEF, chb, AMPKalpha, RhoGEF2, trio, Rlip, Pten, Akap200, RhoGAP5A, lid, CG10188, enok, Nplp1, Strip, Sf3a2, CG7483, CG4849, PIP4K, Vav, Efa6, Unc-89, Epac, sif, sra, cno, pzg, par-1, Exn, CG43102, pyd, RhoGEF3, Cdep, rad
cluster_5	1	GO:0051130	positive regulation of cellular component organization	BP	139	39	22.38	1.7	0.8	0.0002	0.0012	dlg1, Pkc53E, spir, Su(var)205, Syt1, Rop, inaC, TfIIFalpha, Rac1, Cdc42, TfIIFbeta, simj, Arp2, CASK, Abi, WASp, trio, Bap60, DAAM, drpr, Syt4, Arpc2, Rtf1, Cip4, RhoGAP68F, Abp1, RhoGAP92B, Nrx-1, G9a, SCAR, Pak3, Jupiter, sif, lap, Opa1, aPKC, norpA, AP-2alpha, Syx7
cluster_5	2	GO:0051253	negative regulation of RNA metabolic process	BP	129	35	20.77	1.7	0.75	0.00084	0.0039	gro, swm, Lam, Sce, Su(var)205, fs(1)h, LamC, TH1, simj, Psi, Ssb-c31a, chn, Rbf, snRNP-U1-70K, Max, mip130, jim, NELF-B, Usp7, mip120, mip40, DMAP1, NC2alpha, MEP-1, Prp3, FBXO11, pad, Nelf-A, rept, Spt5, elav, AGO1, sqd, l(3)neo38, kis	GABA-B-R2, RnpS1, GABA-B-R1, Acn
cluster_5	2	GO:0007155	cell adhesion	BP	116	32	18.67	1.7	0.78	0.001	0.0045	flw, Gbeta13F, Galphao, dlg1, LanA, pbl, mts, mys, hig, alpha-Cat, Rac1, cora, Hem, CASK, Abi, sns, Pten, SPARC, Pgant3, drpr, prc, RhoGAP5A, O-fut1, Cont, Sra-1, PIP4K, Vav, SCAR, par-1, LanB1, pyd, Nrg
cluster_5	1	GO:0007417	central nervous system development	BP	126	34	20.28	1.7	0.75	0.0011	0.0048	Appl, brm, bsk, Galphao, Lam, LanA, Sce, Scm, vap, Nrt, Csp, mys, Rac1, Ror, Hem, CalpA, mbc, Abi, SmD3, trio, DAAM, RhoGAPp190, Ulp1, Ced-12, Dscam1, enok, Dmtn, Vav, SMC1, bun, elav, CG3638, l(3)72Ab, Nrg
cluster_5	1	GO:0005700	polytene chromosome	CC	97	27	15.61	1.7	0.79	0.0022	0.0082	bur, His2Av, mod(mdg4), peb, Scm, Su(var)205, trx, Pp1-87B, Hrb87F, Pep, B52, woc, Hel25E, mip130, vig, RpII33, Usp7, mip120, Fcp1, MEP-1, Spt5, SMC1, G9a, CG4747, Chro, pzg, sqd
cluster_5	1	GO:0005768	endosome	CC	90	25	14.49	1.7	0.79	0.0032	0.012	Rab32, inaC, Arf51F, Rab10, Ocrl, rush, CG11178, Hrs, Rbpn-5, Vps20, CG10103, CG6707, RhoGAP68F, Chmp1, Vps24, Snx3, CG6607, Vps2, shrb, Vps36, Rab26, nwk, Vamp7, Syx7, Vps4
cluster_5	1	GO:0030431	sleep	BP	84	23	13.52	1.7	0.77	0.0056	0.019	Pka-C1, rut, Sh, CanB, Pp2B-14D, Hsp60A, CanB2, spen, homer, CG11050, Drat, CG8435, Golgin245, Cpr73D, FBXO11, CG6330, NaCP60E, sra, bun, CG42613, mub, Hk, kis
cluster_5	1	GO:0007293	germarium-derived egg chamber formation	BP	80	22	12.88	1.7	0.77	0.0063	0.021	flw, pbl, Sce, Scm, Btk29A, alpha-Cat, Cdc42, chb, Inx2, Hsp60C, Vps20, Cip4, sosie, Rbfox1, par-1, Ppcs, aPKC, AGO1, hts, sqd, PI4KIIIalpha, Syx7
cluster_5	1	GO:0008360	regulation of cell shape	BP	80	22	12.88	1.7	0.77	0.0063	0.021	Sos, pbl, mts, drk, mys, Rac1, Cdc42, Hem, CASK, Rac2, Abi, RhoGEF2, WASp, Pten, Arpc2, Sra-1, PIP4K, Vav, SCAR, cno, par-1, pyd
cluster_5	1	GO:0051050	positive regulation of transport	BP	76	21	12.23	1.7	0.78	0.0071	0.023	swm, Pkc53E, Syt1, inaC, CanB, jar, CASK, noi, Kap-alpha3, drpr, Syt4, Wnk, Snx3, RhoGAP92B, Nrx-1, lap, norpA, SERCA, Fife, AP-2alpha, Syx7
cluster_5	2	GO:0008593	regulation of Notch signaling pathway	BP	61	17	9.82	1.7	0.79	0.013	0.038	E(bx), Su(dx), dom, Dap160, Rbcn-3A, AP-1mu, Hrs, O-fut1, Rtf1, Vps20, Vps2, krz, shrb, Vps36, bun, pzg, Vps4	Taf1, heph, aux, cno, pyd
cluster_5	1	GO:0030031	cell projection assembly	BP	58	16	9.34	1.7	0.78	0.018	0.047	mys, hep, Rac1, Cdc42, Arp2, Hem, Rac2, Abi, DAAM, Arpc2, CG14367, Sra-1, SCAR, sif, aPKC, CaMKII
cluster_5	2	GO:0042048	olfactory behavior	BP	63	17	10.14	1.7	0.75	0.018	0.049	Pka-C1, dnc, Rab32, rut, Pp1-87B, Gad1, Syn, drk, Nmdar1, Spn, Inx2, GABA-B-R2, PQBP1, NaCP60E, sra, AGO1, rad	Sh
cluster_5	1	GO:0005886	plasma membrane	CC	404	107	65.03	1.6	0.72	1.3e-08	3.8e-07	nAChRbeta1, Appl, Pka-C1, eag, Gbeta13F, Galphao, Galphas, Grd, inaD, dlg1, Sos, LanA, mod(mdg4), ninaA, ninaC, Pkc53E, rut, Sh, Btk29A, Syb, Nrt, Csp, Galphaq, GluRIA, Gbeta76C, drk, ogre, mys, inaC, alpha-Cat, Lcch3, Rac1, AP-1-2beta, Nmdar1, Ror, cora, Snap25, Hem, nSyb, Syx1A, Arf51F, mbc, nrv1, Lgr1, stnB, stnA, Abi, vimar, RhoGEF2, Dap160, Ac78C, sns, trio, Clc, Pli, Eaat1, Inx2, GABA-B-R2,…
cluster_5	1	GO:0048583	regulation of response to stimulus	BP	455	115	73.24	1.6	0.65	6.1e-08	1.5e-06	Arr1, Arr2, ben, brm, bsk, Pka-C1, dnc, E(bx), flw, gro, inaD, Sos, swm, Lam, ninaC, pbl, peb, Pp1alpha-96A, rut, Su(dx), trx, vap, Pp1-87B, mts, Csp, Galphaq, Gbeta76C, drk, inaC, hep, Rac1, Cdc42, Taf1, dock, heph, Cdc37, CalpA, mtd, Rac2, RtGEF, spen, dom, chb, AMPKalpha, RhoGEF2, Dap160, Rbcn-3A, trio, AP-1mu, Pli, Rlip, Pten, Eaat1, Ulp1, Akap200, RhoGAP5A, Hrs, lid, CG4972, holn1, RluA-2, C…
cluster_5	1	GO:0051649	establishment of localization in cell	BP	397	102	63.91	1.6	0.67	1.7e-07	3.5e-06	comt, Dab, flw, DCTN1-p150, dlg1, swm, Lam, ninaC, rb, RanGAP, sesB, Syb, Pp1-87B, Csp, Syt1, Rop, Syn, Gdi, Rab3, CanB, AP-1-2beta, cora, Nup214, jar, Snap25, Arp1, nSyb, Syx1A, Arf51F, CASK, Hel25E, noi, Hsp60A, CanB2, stnB, stnA, Tim17b2, chb, Dap160, WASp, Clc, AP-1mu, rush, Eb1, Kap-alpha3, Madm, GABA-B-R2, htt, Syt4, Tomosyn, Frq1, Nup205, CG1724, tho2, Hrs, Hsp60C, Tom70, tomboy40, Synj, G…
cluster_5	1	GO:0009887	animal organ morphogenesis	BP	428	108	68.9	1.6	0.65	1.8e-07	3.9e-06	brm, bsk, by, Pka-C1, Dab, Eip71CD, flw, Gbeta13F, DCTN1-p150, Galphao, Galphas, Hsp27, dlg1, Sos, Lam, LanA, peb, px, Btk29A, Su(dx), mts, Csp, Hrb87F, Cyp1, Galphaq, drk, svr, fs(1)h, mys, hep, Rac1, Cdc42, LamC, Nmdar1, cora, NAT1, heph, jar, Hem, mtd, Rac2, chn, rin, Past1, spen, pcm, vimar, RhoGEF2, EloB, sns, WASp, trio, SF1, Pten, l(1)G0007, drpr, morgue, Akap200, prc, sds22, RhoGAP5A, Atg…
cluster_5	1	GO:0030030	cell projection organization	BP	343	89	55.21	1.6	0.69	7.2e-07	1.1e-05	Appl, ben, brm, bsk, bur, Dab, dnc, E(bx), Eip71CD, DCTN1-p150, Galphao, gro, Sos, LanA, pbl, rut, Scm, Sh, trx, Pp1-87B, Nrt, Galphaq, Rop, fs(1)h, mys, Taf4, hep, Rac1, Cdc42, cora, dock, Arp2, Hem, Rac2, chn, spen, dom, Abi, chb, AMPKalpha, RhoGEF2, WASp, trio, CG11448, rush, Bap60, DAAM, RhoGAPp190, Pten, jim, Ulp1, htt, CdGAPr, Arpc2, Dscam1, enok, MEP-1, Strip, Cip4, Wnk, CG14367, Sra-1, Rh…
cluster_5	1	GO:0003723	RNA binding	MF	343	88	55.21	1.6	0.67	1.4e-06	2e-05	SmF, swm, snf, Su(var)205, tra2, nonA, Hrb87F, Pep, B52, Pabp2, TH1, NAT1, Ref1, heph, noi, Psi, rin, Spx, hrg, snRNP-U1-70K, U2af38, Cbp80, Cbp20, qkr58E-3, qkr58E-1, qkr54B, SmD3, waw, vig, Srp54, Neos, Cpsf160, SF1, NELF-B, Cpsf100, x16, hfp, CG11444, CG3436, Sf3b1, CG4887, CG4896, Sf3b2, Phf5a, CG17768, RluA-2, U2A, mIF3, CG7185, CG3689, CG10418, Sf3a2, U4-U6-60K, CG6841, Prp3, CG9667, CG7483…
cluster_5	1	GO:0040007	growth	BP	270	70	43.46	1.6	0.69	1.3e-05	0.00013	ben, bsk, dnc, eag, DCTN1-p150, Galphao, dlg1, LanA, rut, Scm, sesB, Sh, vap, Syn, mys, Ac76E, hep, Rac1, Cdc42, simj, Arp2, Hem, CASK, Rac2, mbc, rin, Rab10, RtGEF, pcm, Abi, Pi3K21B, AMPKalpha, RhoGEF2, Dap160, WASp, trio, DAAM, Pten, drpr, hfp, Tollo, CG9328, Dscam1, Strip, Cip4, RhoGAP68F, Abp1, RhoGAP92B, Nrx-1, atl, veli, RhoGAP100F, PIP4K, SCAR, Liprin-alpha, shrb, vari, alphaSnap, bun, cn…
cluster_5	1	GO:0048569	post-embryonic animal organ development	BP	253	66	40.73	1.6	0.7	1.9e-05	0.00017	brm, bsk, by, Pka-C1, flw, Galphao, Galphas, Hsp27, dlg1, Sos, LanA, px, Btk29A, Su(dx), drk, svr, fs(1)h, mys, hep, Rac1, Cdc42, Nmdar1, cora, heph, jar, mtd, chn, mbc, Past1, spen, pcm, RhoGEF2, EloB, sns, trio, SF1, SPARC, l(1)G0007, Ulp1, prc, sds22, RhoGAP5A, lid, Cip4, RhoGAP68F, CG8149, RhoGAP92B, EloA, rept, krz, Rbfox1, Mical, alphaSnap, bun, vlc, Dys, Rrp40, par-1, Alh, Ppcs, Exn, CG434…
cluster_5	1	GO:0032879	regulation of localization	BP	203	52	32.68	1.6	0.67	0.00024	0.0014	Pka-C1, swm, LanA, Rab32, Pkc53E, rb, Su(dx), vap, Syt1, Rop, mys, inaC, ple, CanB, Rac1, Nup214, jar, Syx1A, CASK, Rac2, noi, stnB, AP-1mu, Pten, Kap-alpha3, GABA-B-R2, drpr, Syt4, Frq1, Hrs, RhoGAP68F, Wnk, Snx3, RhoGAP92B, Nrx-1, CG4960, tamo, Liprin-alpha, gw, Frq2, lap, Rab26, cno, Dys, par-1, Exn, norpA, SERCA, Fife, AP-2alpha, kis, Syx7
cluster_5	1	GO:0006366	transcription by RNA polymerase II	BP	208	52	33.48	1.6	0.64	0.00046	0.0025	brm, E(bx), gro, Sos, dre4, peb, RpII18, trx, B52, drk, fs(1)h, RpII15, Taf4, TfIIFalpha, hep, woc, Taf1, TH1, TfIIFbeta, atms, simj, Dp, CalpA, chn, Rbf, Max, Atu, mip130, Srp54, Bap60, RpII33, NELF-B, x16, Hrs, Rpb11, Rpb5, mip120, mip40, NC2alpha, Rtf1, MEP-1, Rpb8, pad, Nelf-A, EloA, Rpb10, Spt5, Rpb7, RpII140, nwk, SC35, kis
cluster_5	2	GO:0048749	compound eye development	BP	174	45	28.01	1.6	0.68	0.00051	0.0027	Pka-C1, Dab, fl(2)d, DCTN1-p150, Sos, Lam, peb, Scm, mts, Hrb87F, Galphaq, drk, Rac1, AP-1-2beta, chn, rin, spen, vimar, sns, AP-1mu, Pten, morgue, RhoGAP5A, holn1, p47, aux, Sra-1, AP-1sigma, PQBP1, RhoGAP100F, Vav, Nhe2, SCAR, Liprin-alpha, snama, Egm, alphaSnap, bun, cno, Opa1, aPKC, pyd, norpA, tau, Vps4
cluster_5	5	GO:0035120	post-embryonic appendage morphogenesis	BP	190	48	30.59	1.6	0.65	0.0006	0.003	brm, by, Pka-C1, flw, Galphao, Galphas, Hsp27, Sos, LanA, px, Btk29A, Su(dx), drk, svr, fs(1)h, mys, Rac1, Cdc42, Nmdar1, cora, heph, mtd, Past1, spen, pcm, RhoGEF2, EloB, trio, SF1, l(1)G0007, RhoGAP5A, Cip4, RhoGAP68F, RhoGAP92B, EloA, rept, Rbfox1, alphaSnap, bun, vlc, Dys, par-1, Ppcs, Exn, CG43427, CG43736, l(3)neo38, kis	HnRNP-K, Syx1A, Alh
cluster_5	1	GO:0051172	negative regulation of nitrogen compound metabolic process	BP	182	46	29.3	1.6	0.65	0.00076	0.0037	gro, swm, Lam, Sce, Su(var)205, fs(1)h, LamC, TH1, simj, heph, Psi, Ssb-c31a, chn, Rbf, snRNP-U1-70K, Max, dom, Cbp80, Cbp20, mip130, jim, NELF-B, GABA-B-R2, Usp7, mip120, casp, mip40, DMAP1, NC2alpha, MEP-1, Prp3, RnpS1, FBXO11, pad, Nelf-A, rept, Spt5, gw, Rbfox1, elav, GABA-B-R1, AGO1, Acn, sqd, l(3)neo38, kis
cluster_5	1	GO:0051960	regulation of nervous system development	BP	163	42	26.24	1.6	0.68	0.00085	0.0039	brm, bsk, Galphao, dlg1, LanA, pbl, mts, Rop, drk, Rac1, Cdc42, simj, Arp2, CalpA, CASK, Rac2, RhoGEF2, Dap160, WASp, trio, DAAM, RhoGAPp190, Pten, Dscam1, Cip4, RhoGAP68F, Abp1, RhoGAP92B, atl, veli, G9a, Pak3, Liprin-alpha, Mical, sif, beta-Spec, bun, aPKC, nwk, CaMKII, kis, PI4KIIIalpha
cluster_5	3	GO:0001745	compound eye morphogenesis	BP	140	37	22.54	1.6	0.72	0.001	0.0045	Dab, DCTN1-p150, Sos, Lam, peb, mts, Hrb87F, Galphaq, drk, Rac1, chn, rin, vimar, sns, Pten, morgue, p47, aux, Sra-1, AP-1sigma, PQBP1, RhoGAP100F, Vav, Nhe2, SCAR, Liprin-alpha, snama, Egm, alphaSnap, bun, cno, Opa1, aPKC, pyd, norpA, tau, Vps4
cluster_5	1	GO:0051049	regulation of transport	BP	136	35	21.89	1.6	0.68	0.0023	0.0087	swm, Pkc53E, vap, Syt1, inaC, CanB, Nup214, jar, Syx1A, CASK, noi, stnB, AP-1mu, Kap-alpha3, GABA-B-R2, drpr, Syt4, Frq1, RhoGAP68F, Wnk, Snx3, RhoGAP92B, Nrx-1, CG4960, tamo, Frq2, lap, Rab26, Dys, Exn, norpA, SERCA, Fife, AP-2alpha, Syx7
cluster_5	3	GO:0016477	cell migration	BP	148	37	23.82	1.6	0.64	0.003	0.011	bsk, Gbeta13F, LanA, mod(mdg4), pbl, trx, mys, inaC, ple, hep, Rac1, Cdc42, jar, Hem, CASK, Rac2, mbc, spen, stumps, chb, Fpps, Pten, prc, CG11178, Hrs, Ced-12, sosie, veli, Vav, SCAR, bun, par-1, Ppcs, LanB1, Evi5, sqd, kis	mip120, alpha-Cat
cluster_5	2	GO:0050790	regulation of catalytic activity	BP	134	34	21.57	1.6	0.66	0.0034	0.012	bsk, bur, Galphas, pbl, RanGAP, vap, Galphaq, Gbeta76C, drk, hep, Rac1, mbc, RtGEF, Abi, Pdf, Dap160, Ocrl, Rlip, GABA-B-R2, RhoGAP5A, Ced-12, CG7324, RhoGAP92B, RhoGAP93B, RhoGAP100F, conu, Vav, krz, Asap, sif, GABA-B-R1, alc, Evi5, SERCA	Pka-C1, Rbf
cluster_5	1	GO:0022604	regulation of cell morphogenesis	BP	110	29	17.71	1.6	0.71	0.0036	0.013	Sos, pbl, mts, drk, mys, Rac1, Cdc42, Hem, CASK, Rac2, Abi, RhoGEF2, WASp, trio, DAAM, RhoGAPp190, Pten, Arpc2, Dscam1, Sra-1, PIP4K, Vav, G9a, SCAR, Liprin-alpha, sif, cno, par-1, pyd
cluster_5	1	GO:0033043	regulation of organelle organization	BP	140	35	22.54	1.6	0.64	0.0039	0.014	Gbeta13F, spir, Btk29A, Su(var)205, Syt1, mys, Cdc42, LamC, jar, Arp2, pcm, Abi, chb, gek, RhoGEF2, Ocrl, WASp, Bap60, DAAM, GABA-B-R2, Syt4, Arpc2, Cip4, RhoGAP68F, CG17816, RhoGAP92B, atl, SCAR, Chro, Jupiter, tum, beta-Spec, Opa1, Patronin, nwk
cluster_5	3	GO:1902679	negative regulation of RNA biosynthetic process	BP	118	30	18.99	1.6	0.66	0.0056	0.019	gro, Lam, Sce, Su(var)205, fs(1)h, LamC, TH1, simj, Ssb-c31a, chn, Rbf, Max, mip130, jim, NELF-B, Usp7, mip120, mip40, DMAP1, NC2alpha, MEP-1, Prp3, FBXO11, pad, Nelf-A, rept, Spt5, AGO1, l(3)neo38, kis
cluster_5	1	GO:0000785	chromatin	CC	95	25	15.29	1.6	0.71	0.0069	0.022	His2Av, mod(mdg4), Su(var)205, Hrb87F, B52, woc, atms, Rbf, mip130, Bap60, Usp7, CG15356, lid, CG18004, mip120, Rtf1, enok, EloA, rept, SMC1, G9a, sqd, SC35, rump, HnRNP-K
cluster_5	1	GO:0002164	larval development	BP	80	21	12.88	1.6	0.71	0.013	0.038	flw, dlg1, mys, Rac1, jar, chn, mbc, EloB, sns, Pten, SPARC, Ulp1, prc, sds22, lid, CG8149, krz, Mical, Rrp40, Alh, btsz
cluster_5	1	GO:0060341	regulation of cellular localization	BP	85	22	13.68	1.6	0.69	0.013	0.038	Pka-C1, swm, Syt1, Rop, CanB, Nup214, Syx1A, CASK, noi, stnB, Kap-alpha3, GABA-B-R2, Syt4, Frq1, Nrx-1, CG4960, tamo, Frq2, Dys, par-1, Exn, Fife
cluster_5	2	GO:0005938	cell cortex	CC	95	24	15.29	1.6	0.65	0.013	0.039	dlg1, pbl, spir, Su(dx), Cdc42, Spn, jar, igl, RhoGEF2, Dap160, WASp, Clc, Arpc2, Abp1, conu, tum, beta-Spec, cno, brp, Dys, par-1, aPKC, pyd, Exo84
cluster_5	1	GO:0007169	transmembrane receptor protein tyrosine kinase signaling pathway	BP	86	22	13.84	1.6	0.67	0.015	0.043	brm, Dab, Sos, peb, drk, Ror, dock, Cdc37, spen, stumps, Pi3K21B, Reph, Pten, Hrs, holn1, Vps20, Chmp1, Vps2, Vav, shrb, Nrg, Vps4
cluster_5	1	GO:0031344	regulation of cell projection organization	BP	68	18	10.95	1.6	0.72	0.019	0.05	pbl, Rop, Rac1, Cdc42, Arp2, Rac2, RhoGEF2, trio, DAAM, RhoGAPp190, Pten, Dscam1, G9a, SCAR, Liprin-alpha, sif, aPKC, CaMKII
cluster_5	1	GO:0051641	cellular localization	BP	491	121	79.04	1.5	0.61	1.2e-07	2.7e-06	by, Pka-C1, comt, Dab, flw, DCTN1-p150, His2Av, dlg1, swm, Lam, ninaC, pbl, rb, RanGAP, sesB, spir, Syb, Pp1-87B, Csp, Syt1, Rop, Syn, Gdi, Rab3, CanB, alpha-Cat, Cdc42, AP-1-2beta, LamC, cora, Nup214, jar, Snap25, Arp1, nSyb, Syx1A, Arf51F, CASK, Hel25E, noi, Hsp60A, CanB2, stnB, stnA, Tim17b2, chb, SmD3, Dap160, WASp, Clc, AP-1mu, rush, Pten, Eb1, Kap-alpha3, Madm, GABA-B-R2, htt, Syt4, Tomosyn…
cluster_5	1	GO:0022607	cellular component assembly	BP	506	122	81.45	1.5	0.58	4e-07	7.3e-06	ben, bsk, Pka-C1, comt, eag, E(bx), fliI, DCTN1-p150, Galphao, dlg1, LanA, pbl, sesB, Sh, spir, Btk29A, Su(var)205, tra2, Pp1-87B, mts, Syt1, Gad1, Rop, Syn, B52, mys, TfIIFalpha, hep, Rac1, Cdc42, Taf1, LamC, TfIIFbeta, cora, Nup214, simj, Snap25, Arp2, Dp, Hem, Syx1A, CASK, Rac2, CanB2, Rbf, pcm, Abi, chb, CG10340, SmD3, Dap160, Ocrl, mip130, sns, WASp, trio, Srp54, Bap60, DAAM, SRPK, Pten, SPA…
cluster_5	1	GO:0007010	cytoskeleton organization	BP	365	91	58.76	1.5	0.63	3.5e-06	4.4e-05	by, Pka-C1, fliI, Gbeta13F, DCTN1-p150, Galphao, gro, dlg1, Sos, Lam, ninaC, pbl, spir, Btk29A, Pp1-87B, mts, drk, mys, Rab3, alpha-Cat, hep, Rac1, Cdc42, LamC, cora, heph, jar, Arp2, Arp1, Hem, CalpA, Arf51F, Rac2, mbc, CanB2, Abi, chb, gek, RhoGEF2, Ocrl, mip130, sns, WASp, trio, DAAM, SRPK, Pten, Eb1, htt, Arp10, Nup205, Ced-12, Arpc2, Cip4, RhoGAP68F, CG17816, Sra-1, RhoGAP92B, Miro, atl, CG1…
cluster_5	1	GO:0000902	cell morphogenesis	BP	383	94	61.65	1.5	0.61	4.9e-06	5.8e-05	Appl, ben, brm, bsk, bur, Dab, dnc, E(bx), Eip71CD, DCTN1-p150, gro, Sos, LanA, pbl, peb, rut, Sce, Scm, Sh, trx, Pp1-87B, Nrt, mts, Galphaq, drk, fs(1)h, mys, Taf4, hep, Rac1, Cdc42, dock, Arp2, Hem, CASK, Rac2, chn, mbc, spen, dom, Abi, chb, AMPKalpha, RhoGEF2, WASp, trio, CG11448, rush, Bap60, DAAM, RhoGAPp190, Pten, jim, Ulp1, htt, qsm, CdGAPr, Arpc2, Dscam1, Vps20, enok, MEP-1, Strip, Wnk, C…
cluster_5	1	GO:0030182	neuron differentiation	BP	410	98	66	1.5	0.57	1e-05	0.00011	Appl, ben, brm, bsk, bur, Dab, dnc, E(bx), Eip71CD, DCTN1-p150, Galphao, gro, Sos, LanA, pbl, peb, rut, Scm, Sh, trx, Pp1-87B, Nrt, mts, Galphaq, Rop, drk, fs(1)h, mys, hig, Taf4, hep, Rac1, Cdc42, cora, dock, Hem, Rac2, chn, rin, spen, dom, Abi, chb, vimar, gek, SmD3, AMPKalpha, RhoGEF2, WASp, trio, CG11448, rush, Bap60, DAAM, RhoGAPp190, Pten, jim, drpr, Ulp1, htt, Tollo, Hrs, CdGAPr, Dscam1, p…
cluster_5	2	GO:0002009	morphogenesis of an epithelium	BP	334	83	53.77	1.5	0.63	1.1e-05	0.00012	brm, bsk, by, Pka-C1, Dab, flw, Gbeta13F, DCTN1-p150, Galphao, Galphas, Hsp27, dlg1, Sos, Lam, LanA, pbl, peb, px, Sce, Scm, Btk29A, Su(dx), drk, svr, fs(1)h, mys, hep, Rac1, Cdc42, Nmdar1, cora, heph, jar, Dp, mtd, Rac2, mbc, rin, Past1, spen, pcm, stumps, RhoGEF2, EloB, trio, SF1, Pten, SPARC, l(1)G0007, Inx2, Akap200, prc, sds22, Tollo, RhoGAP5A, Cip4, RhoGAP68F, CG10068, kuk, RhoGAP92B, EloA,…	LamC
cluster_5	1	GO:0048666	neuron development	BP	365	89	58.76	1.5	0.6	1.2e-05	0.00012	Appl, ben, brm, bsk, bur, Dab, dnc, E(bx), Eip71CD, DCTN1-p150, gro, Sos, LanA, pbl, peb, rut, Scm, Sh, trx, Pp1-87B, Nrt, Galphaq, Rop, fs(1)h, mys, hig, Taf4, hep, Rac1, Cdc42, dock, Hem, Rac2, chn, spen, dom, Abi, chb, vimar, gek, AMPKalpha, RhoGEF2, WASp, trio, CG11448, rush, Bap60, DAAM, RhoGAPp190, Pten, jim, drpr, Ulp1, htt, Tollo, Hrs, CdGAPr, Dscam1, p47, enok, MEP-1, Strip, Wnk, Sra-1, …
cluster_5	1	GO:0051128	regulation of cellular component organization	BP	414	98	66.64	1.5	0.56	1.6e-05	0.00015	Pka-C1, Gbeta13F, Galphao, dlg1, Sos, dre4, LanA, mod(mdg4), pbl, Pkc53E, spir, Btk29A, Su(var)205, vap, mts, Syt1, Rop, B52, drk, mys, inaC, TfIIFalpha, Rac1, Cdc42, LamC, TfIIFbeta, simj, jar, Arp2, Hem, Syx1A, CASK, Rac2, RtGEF, stnB, pcm, Abi, chb, gek, AMPKalpha, RhoGEF2, Ocrl, WASp, trio, Srp54, Bap60, DAAM, RhoGAPp190, Pten, jim, GABA-B-R2, drpr, Syt4, x16, hfp, Arpc2, CG9328, Dscam1, NC2a…
cluster_5	1	GO:0042221	response to chemical	BP	426	100	68.58	1.5	0.54	1.9e-05	0.00017	ben, brm, bsk, bur, Pka-C1, Dab, dnc, eag, E(bx), Eip71CD, Galphas, Hsp67Bc, dlg1, Sos, LanA, Rab32, Pfk, rut, sesB, Sh, trx, vap, Pp1-87B, Nrt, Galphaq, Gad1, Syn, drk, mys, inaC, hep, Tbh, Rac1, Cdc42, Nmdar1, dock, Spn, CalpA, Arf51F, CASK, Fer2LCH, alpha-Est7, Lgr1, spen, stumps, dom, Abi, Pi3K21B, chb, Cbp80, Cbp20, AMPKalpha, Ac78C, trio, DAAM, homer, Pten, Inx2, GABA-B-R2, Ulp1, Akap200, H…
cluster_5	1	GO:0043933	protein-containing complex subunit organization	BP	362	87	58.27	1.5	0.58	2.8e-05	0.00023	brm, bur, comt, eag, E(bx), flw, Gbeta13F, DCTN1-p150, His2Av, dre4, Lam, mod(mdg4), Pp1alpha-96A, Sce, Sh, spir, Btk29A, Su(var)205, tra2, trx, Pp1-87B, Csp, Rop, B52, TfIIFalpha, Cdc42, Taf1, LamC, TfIIFbeta, Nup214, atms, Snap25, Arp2, Hel25E, CanB2, Atu, pcm, dom, CG10340, RhoGEF2, vig, WASp, Srp54, Bap60, DAAM, jim, x16, hfp, Usp7, Tomosyn, Nup205, Hrs, lid, Wdr82, Ing5, Arpc2, PI31, DMAP1, …
cluster_5	1	GO:0009791	post-embryonic development	BP	361	85	58.11	1.5	0.55	7.7e-05	0.00054	brm, bsk, by, Pka-C1, E(bx), Eip71CD, flw, Galphao, Galphas, Hsp27, dlg1, Sos, LanA, px, Btk29A, Su(dx), Cyp1, drk, svr, fs(1)h, mys, Ac76E, hep, woc, Rac1, Cdc42, Nmdar1, cora, NAT1, heph, jar, Fdx1, mtd, chn, mbc, Past1, spen, pcm, dom, RhoGEF2, EloB, sns, trio, SF1, Pten, SPARC, l(1)G0007, drpr, Ulp1, Akap200, prc, sds22, RhoGAP5A, Atg5, CG7860, lid, Cip4, RhoGAP68F, CG8149, RhoGAP92B, EloA, r…
cluster_5	1	GO:0007600	sensory perception	BP	336	79	54.09	1.5	0.55	0.00015	0.00095	Arr1, Arr2, eag, E(bx), Galphao, Galphas, His2Av, inaD, dlg1, pbl, Sh, trx, mts, nonA, Pep, Galphaq, mys, inaC, Rac1, Cdc42, AP-1-2beta, Nmdar1, atms, Ref1, Obp19d, Arp2, CASK, Psi, Mo25, pcm, dom, Trxr-1, l(2)k14710, qkr58E-1, Pdf, Ac78C, Clc, AP-1mu, l(1)G0007, Eb1, Akap200, Pdha, CG14442, Arp10, CG4887, Phf5a, Wdr82, holn1, Swip-1, Dscam1, U2A, CG1371, Ciao1, Sf3a2, Syx8, CNPYb, CG9636, Tk, Rh…
cluster_5	1	GO:0002165	instar larval or pupal development	BP	326	77	52.48	1.5	0.55	0.00015	0.00098	brm, bsk, by, Pka-C1, E(bx), Eip71CD, flw, Galphao, Galphas, Hsp27, dlg1, Sos, LanA, px, Btk29A, Su(dx), Cyp1, drk, svr, fs(1)h, mys, Ac76E, hep, woc, Rac1, Cdc42, Nmdar1, cora, NAT1, heph, jar, Fdx1, mtd, Past1, spen, pcm, dom, RhoGEF2, EloB, trio, SF1, Pten, SPARC, l(1)G0007, drpr, Akap200, sds22, RhoGAP5A, Atg5, CG7860, Cip4, RhoGAP68F, CG8149, RhoGAP92B, EloA, rept, krz, G9a, Rbfox1, alphaSna…
cluster_5	1	GO:0007166	cell surface receptor signaling pathway	BP	293	70	47.17	1.5	0.57	0.00022	0.0013	brm, bsk, Pka-C1, Dab, E(bx), flw, Galphao, gro, Sos, swm, pbl, peb, Pp1alpha-96A, Su(dx), Pp1-87B, mts, drk, Rac1, Cdc42, Taf1, Nmdar1, Ror, dock, Nup214, heph, Cdc37, CalpA, Rac2, spen, stumps, dom, Pi3K21B, Reph, Dap160, Rbcn-3A, AP-1mu, Pli, Pten, Eaat1, Ulp1, Nup205, Hrs, holn1, O-fut1, casp, Rtf1, Vps20, UbcE2M, Chmp1, Wnk, aux, Snx3, Irk2, RanBP3, Vps2, Vav, krz, Trim9, tum, shrb, Vps36, a…
cluster_5	1	GO:0006928	movement of cell or subcellular component	BP	306	72	49.26	1.5	0.55	0.00029	0.0017	brm, bsk, bur, Dab, Gbeta13F, DCTN1-p150, Sos, LanA, mod(mdg4), pbl, trx, Pp1-87B, Nrt, Galphaq, mys, inaC, ple, hep, Rac1, Cdc42, dock, jar, Arp1, Hem, CASK, Rac2, mbc, spen, stumps, dom, Abi, chb, AMPKalpha, RhoGEF2, WASp, trio, Fpps, DAAM, Pten, htt, prc, CG11178, Arp10, Hrs, Ced-12, CdGAPr, Dscam1, mip120, enok, Wnk, Sra-1, RhoGAP93B, AP-1sigma, Miro, sosie, veli, RhoGAP100F, Vav, SCAR, Lipri…
cluster_5	2	GO:0060562	epithelial tube morphogenesis	BP	256	62	41.21	1.5	0.59	0.00034	0.0019	brm, bsk, by, Pka-C1, flw, Galphao, Galphas, Hsp27, dlg1, Sos, Lam, LanA, pbl, px, Btk29A, Su(dx), drk, svr, fs(1)h, mys, hep, Rac1, Cdc42, Nmdar1, cora, heph, jar, mtd, Past1, spen, pcm, stumps, RhoGEF2, EloB, trio, SF1, SPARC, l(1)G0007, sds22, RhoGAP5A, Cip4, RhoGAP68F, RhoGAP92B, EloA, rept, Rbfox1, alphaSnap, bun, vlc, Dys, par-1, Ppcs, Exn, LanB1, aPKC, pyd, CG43427, CG43736, Nrg, l(3)neo38…	Syb, Rac2, Inx2, btsz
cluster_5	1	GO:2000026	regulation of multicellular organismal development	BP	270	64	43.46	1.5	0.56	0.00052	0.0027	ben, brm, bsk, Pka-C1, Gbeta13F, Galphao, dlg1, LanA, pbl, mts, Syt1, Galphaq, Rop, drk, ple, Rac1, Cdc42, simj, Arp2, Fdx1, Pp2B-14D, CalpA, Syx1A, CASK, Rac2, chn, rin, pcm, RhoGEF2, Dap160, WASp, trio, DAAM, RhoGAPp190, Pten, Ulp1, morgue, Akap200, Hrs, Dscam1, Cip4, RhoGAP68F, Abp1, CG10068, RhoGAP92B, atl, veli, krz, G9a, Pak3, Liprin-alpha, Mical, sif, beta-Spec, bun, cno, par-1, aPKC, pyd,…
cluster_5	2	GO:0007560	imaginal disc morphogenesis	BP	219	54	35.25	1.5	0.62	0.00052	0.0028	brm, bsk, by, Pka-C1, flw, Galphao, Galphas, Hsp27, dlg1, Sos, LanA, px, Btk29A, Su(dx), drk, svr, fs(1)h, mys, hep, Rac1, Cdc42, Nmdar1, cora, heph, jar, mtd, Past1, spen, pcm, RhoGEF2, EloB, trio, SF1, l(1)G0007, sds22, RhoGAP5A, Cip4, RhoGAP68F, RhoGAP92B, EloA, rept, Rbfox1, alphaSnap, bun, vlc, Dys, par-1, Ppcs, Exn, CG43427, CG43736, Nrg, l(3)neo38, kis
cluster_5	1	GO:0007423	sensory organ development	BP	230	56	37.02	1.5	0.6	0.00058	0.0029	Pka-C1, Dab, fl(2)d, DCTN1-p150, Galphas, Sos, Lam, peb, Sce, Scm, mts, Hrb87F, Galphaq, drk, Rac1, AP-1-2beta, NAT1, Hem, Fer2LCH, chn, rin, spen, Abi, vimar, sns, WASp, AP-1mu, Pten, Eb1, morgue, RhoGAP5A, holn1, p47, Abp1, aux, Sra-1, pad, AP-1sigma, PQBP1, RhoGAP100F, Vav, Nhe2, SCAR, Liprin-alpha, snama, Egm, alphaSnap, bun, cno, Opa1, Ppcs, aPKC, pyd, norpA, tau, Vps4
cluster_5	1	GO:0031324	negative regulation of cellular metabolic process	BP	229	54	36.86	1.5	0.55	0.0016	0.0067	bsk, flw, gro, swm, Lam, peb, Sce, Su(var)205, drk, fs(1)h, LamC, TH1, simj, heph, Psi, Ssb-c31a, chn, Rbf, snRNP-U1-70K, Max, dom, Cbp80, Cbp20, mip130, jim, NELF-B, GABA-B-R2, Usp7, Hrs, mip120, casp, mip40, DMAP1, NC2alpha, MEP-1, Prp3, RnpS1, FBXO11, pad, Nelf-A, rept, krz, Spt5, gw, Rbfox1, elav, GABA-B-R1, par-1, SelD, AGO1, Acn, sqd, l(3)neo38, kis
cluster_5	1	GO:0065003	protein-containing complex assembly	BP	189	46	30.42	1.5	0.6	0.0018	0.0071	comt, eag, E(bx), Sh, spir, Btk29A, Su(var)205, tra2, Rop, B52, TfIIFalpha, Cdc42, Taf1, LamC, TfIIFbeta, Nup214, Snap25, Arp2, CanB2, pcm, CG10340, WASp, Srp54, Bap60, DAAM, x16, hfp, Tomosyn, Hrs, Arpc2, PI31, NC2alpha, enok, Cip4, CG7483, FBXO11, RhoGAP92B, SCAR, LSm3, Jupiter, lap, alphaSnap, AGO1, Hk, nwk, SC35
cluster_5	1	GO:0010629	negative regulation of gene expression	BP	195	47	31.39	1.5	0.58	0.002	0.0077	gro, swm, Lam, rb, Sce, Scm, Su(var)205, fs(1)h, LamC, TH1, simj, heph, Psi, Ssb-c31a, chn, Rbf, snRNP-U1-70K, Max, pcm, dom, Cbp80, Cbp20, mip130, vig, jim, NELF-B, Usp7, trsn, mip120, mip40, DMAP1, NC2alpha, MEP-1, Prp3, FBXO11, pad, Nelf-A, rept, Spt5, SMC1, gw, Rbfox1, elav, AGO1, sqd, l(3)neo38, kis
cluster_5	1	GO:0030234	enzyme regulator activity	MF	153	37	24.63	1.5	0.59	0.0055	0.019	bur, pbl, RanGAP, vap, mts, Cyp1, Gdi, CanB, Cdc37, CanB2, Pi3K21B, Ocrl, Pli, Rlip, RhoGAPp190, sds22, CG3626, RhoGAP5A, Graf, Frq1, CdGAPr, CG17739, CG7394, RhoGAP68F, RhoGDI, CG7324, RhoGAP92B, RhoGAP93B, RhoGAP100F, conu, Asap, tum, alphaSnap, Pp2A-29B, norpA, Evi5, rad
cluster_5	1	GO:1901700	response to oxygen-containing compound	BP	143	35	23.02	1.5	0.6	0.0056	0.019	bsk, Pka-C1, dnc, eag, E(bx), Galphas, Hsp67Bc, dlg1, Pfk, rut, Sh, vap, Galphaq, Syn, inaC, Tbh, Nmdar1, dock, Arf51F, CASK, Pi3K21B, Ac78C, homer, Pten, Akap200, Jwa, Drat, Balat, PHGPx, CG3967, rept, G9a, CG32638, pzg, whd
cluster_5	2	GO:0007476	imaginal disc-derived wing morphogenesis	BP	170	40	27.37	1.5	0.55	0.0065	0.022	brm, by, Pka-C1, flw, Galphao, Galphas, Hsp27, LanA, px, Btk29A, Su(dx), drk, svr, fs(1)h, mys, Rac1, Cdc42, Nmdar1, cora, heph, mtd, Past1, spen, pcm, RhoGEF2, EloB, SF1, l(1)G0007, Cip4, EloA, Rbfox1, alphaSnap, bun, Dys, par-1, Ppcs, CG43427, CG43736, l(3)neo38, kis
cluster_5	1	GO:0048598	embryonic morphogenesis	BP	128	31	20.6	1.5	0.59	0.01	0.031	bsk, Dab, fliI, Gbeta13F, dlg1, LanA, pbl, peb, Btk29A, mys, hep, Rac1, Cdc42, cora, jar, Rac2, mbc, pcm, stumps, RhoGEF2, SPARC, Inx2, RhoGAP68F, kuk, Vav, krz, cno, LanB1, aPKC, pyd, btsz
cluster_5	1	GO:0006955	immune response	BP	145	34	23.34	1.5	0.54	0.012	0.037	brm, bsk, E(bx), DCTN1-p150, Lam, LanA, Pp1alpha-96A, Galphaq, hep, Rac1, Cdc42, mtd, Rac2, Fer2LCH, Pli, Pten, Eb1, Tollo, RluA-2, casp, DMAP1, RhoBTB, CG9636, Npc2g, Vav, CG32795, par-1, Exn, LanB1, aPKC, norpA, RhoGEF3, Nrg, kis
cluster_5	1	GO:0005773	vacuole	CC	140	33	22.54	1.5	0.55	0.013	0.037	Sap-r, Rab32, inaC, Arf51F, Rab10, Rack1, Ocrl, rush, VhaSFD, Atg5, CG11178, Hrs, Rbpn-5, Vps20, VhaM9.7-a, Syx17, CG10103, CG6707, RhoGAP68F, Chmp1, Vps24, Snx3, CG6607, Vps2, Syt7, shrb, Vps36, Rab26, Vha44, nwk, Vamp7, Syx7, Vps4
cluster_5	2	GO:0051240	positive regulation of multicellular organismal process	BP	116	28	18.67	1.5	0.58	0.015	0.043	ben, bsk, dlg1, pbl, Rop, drk, Rac1, simj, Arp2, Dp, Fdx1, pcm, Pdf, Dap160, trio, homer, morgue, RhoGAP68F, Abp1, Tk, RhoGAP92B, PIP4K, G9a, Pak3, bun, aPKC, kis, btsz	DAAM, Opa1
cluster_5	1	GO:0019725	cellular homeostasis	BP	101	25	16.26	1.5	0.62	0.015	0.043	comt, Hex-A, sesB, Csp, Galphaq, Fer2LCH, Rack1, Trxr-1, vimar, Rbcn-3A, CG4199, CG11007, CG5554, Syx17, Miro, Gyf, Nhe2, mib2, Pgk, PMCA, Dys, alc, norpA, SERCA, hts
cluster_5	1	GO:0048699	generation of neurons	BP	449	104	72.28	1.4	0.52	2.3e-05	0.0002	Appl, ben, brm, bsk, bur, Dab, dnc, E(bx), Eip71CD, Gbeta13F, DCTN1-p150, Galphao, gro, dlg1, Sos, LanA, pbl, peb, rut, Scm, Sh, trx, Pp1-87B, Nrt, mts, Galphaq, Rop, drk, fs(1)h, mys, hig, Taf4, hep, Rac1, Cdc42, cora, dock, jar, Hem, Rac2, chn, rin, spen, dom, Abi, chb, vimar, gek, SmD3, AMPKalpha, RhoGEF2, Dap160, WASp, trio, CG11448, rush, Bap60, DAAM, RhoGAPp190, Pten, jim, drpr, Ulp1, htt, …
cluster_5	1	GO:0032989	cellular component morphogenesis	BP	453	104	72.92	1.4	0.51	3.5e-05	0.00027	Appl, ben, brm, bsk, bur, Dab, dnc, E(bx), Eip71CD, fliI, DCTN1-p150, gro, Sos, LanA, pbl, peb, rut, Sce, Scm, Sh, trx, Pp1-87B, Nrt, mts, Galphaq, drk, fs(1)h, mys, Taf4, hep, Rac1, Cdc42, dock, Arp2, Dp, Hem, CASK, Rac2, chn, mbc, CanB2, Rbf, spen, dom, Abi, chb, AMPKalpha, RhoGEF2, mip130, WASp, trio, CG11448, rush, Bap60, DAAM, RhoGAPp190, Pten, jim, Ulp1, htt, qsm, CdGAPr, Arpc2, Dscam1, mip…
cluster_5	1	GO:0051239	regulation of multicellular organismal process	BP	369	85	59.4	1.4	0.52	0.00017	0.0011	ben, brm, bsk, Pka-C1, eag, Gbeta13F, Galphao, dlg1, LanA, pbl, Pkc53E, rut, Sh, mts, Syt1, Galphaq, Rop, drk, Ac76E, ple, hep, Rac1, Cdc42, simj, Arp2, Dp, Fdx1, Pp2B-14D, CalpA, Syx1A, CASK, Rac2, chn, rin, RtGEF, Atu, pcm, dom, Pi3K21B, AMPKalpha, RhoGEF2, Pdf, Dap160, WASp, trio, DAAM, homer, RhoGAPp190, Pten, Eaat1, Ulp1, morgue, Akap200, Hrs, Dscam1, Cip4, RhoGAP68F, Abp1, CG10068, CG9636, …
cluster_5	1	GO:0009605	response to external stimulus	BP	455	101	73.24	1.4	0.46	0.00019	0.0012	Arr1, Arr2, brm, bsk, bur, Dab, Galphao, Hsp27, inaD, dlg1, Sos, LanA, ninaA, ninaC, Pp1alpha-96A, sesB, Sh, trx, Pp1-87B, Nrt, Csp, nonA, Hrb87F, Galphaq, Gad1, Gbeta76C, ogre, mys, inaC, Ac76E, ple, hep, Rac1, Cdc42, Nmdar1, dock, CalpA, mtd, Rac2, Fer2LCH, chn, Rbf, stnA, spen, pcm, dom, Abi, Rack1, chb, AMPKalpha, Pdf, trio, Srp54, Pli, DAAM, Pten, GABA-B-R2, drpr, Ulp1, Atg5, Nup205, RluA-2,…
cluster_5	1	GO:0035295	tube development	BP	385	86	61.98	1.4	0.47	0.00048	0.0026	brm, bsk, by, Pka-C1, flw, Galphao, Galphas, Hsp27, dlg1, Sos, Lam, LanA, pbl, peb, px, Btk29A, Su(dx), Syb, drk, svr, fs(1)h, mys, ple, hep, Rac1, Cdc42, Nmdar1, cora, heph, jar, Pp2B-14D, Syx1A, mtd, Rac2, mbc, rin, Past1, spen, pcm, stumps, dom, Rack1, RhoGEF2, EloB, trio, Fpps, SF1, SPARC, l(1)G0007, Inx2, drpr, sds22, RhoGAP5A, holn1, Cip4, RhoGAP68F, Wnk, CG8149, Snx3, RhoGAP92B, EloA, Irk2…
cluster_5	3	GO:0048707	instar larval or pupal morphogenesis	BP	275	64	44.27	1.4	0.53	0.00087	0.004	brm, bsk, by, Pka-C1, Eip71CD, flw, Galphao, Galphas, Hsp27, dlg1, Sos, LanA, px, Btk29A, Su(dx), Cyp1, drk, svr, fs(1)h, mys, hep, Rac1, Cdc42, Nmdar1, cora, NAT1, heph, jar, mtd, Past1, spen, pcm, RhoGEF2, EloB, trio, SF1, Pten, l(1)G0007, drpr, Akap200, sds22, RhoGAP5A, Atg5, CG7860, Cip4, RhoGAP68F, CG8149, RhoGAP92B, EloA, rept, Rbfox1, alphaSnap, bun, vlc, Dys, eIF4G2, par-1, Ppcs, Exn, CG4…	Chro, btsz
cluster_5	1	GO:0007444	imaginal disc development	BP	328	74	52.8	1.4	0.49	0.0009	0.0041	brm, bsk, by, Pka-C1, flw, Galphao, Galphas, Hsp27, dlg1, Sos, LanA, peb, px, Btk29A, Su(dx), drk, svr, fs(1)h, mys, ple, hep, Rac1, Cdc42, Nmdar1, cora, heph, jar, Pp2B-14D, Syx1A, mtd, rin, Past1, spen, pcm, dom, Rack1, RhoGEF2, EloB, trio, Fpps, SF1, l(1)G0007, drpr, sds22, RhoGAP5A, holn1, Cip4, RhoGAP68F, Wnk, CG8149, Snx3, RhoGAP92B, EloA, Irk2, rept, G9a, Rbfox1, alphaSnap, bun, vlc, Dys, …
cluster_5	1	GO:0048646	anatomical structure formation involved in morphogenesis	BP	305	68	49.1	1.4	0.47	0.002	0.0078	bsk, Dab, fliI, flw, DCTN1-p150, pbl, Pfk, Sce, Scm, spir, Btk29A, Syb, mys, alpha-Cat, hep, Rac1, Cdc42, dock, heph, jar, Dp, Hem, CalpA, Syx1A, Arf51F, Rac2, Pglym78, mbc, CanB2, Rbf, Past1, stumps, chb, RhoGEF2, mip130, sns, WASp, DAAM, Inx2, Hsp60C, Ced-12, mip120, mip40, Vps20, Cip4, RhoGAP68F, aux, CG14367, kuk, sosie, Vav, SCAR, Pak3, Rbfox1, Mical, Unc-89, mib2, Pgk, bun, par-1, Ppcs, aPK…
cluster_5	2	GO:0010605	negative regulation of macromolecule metabolic process	BP	247	57	39.76	1.4	0.52	0.0021	0.0078	bsk, flw, gro, swm, Lam, peb, rb, Sce, Scm, Su(var)205, drk, fs(1)h, LamC, TH1, simj, heph, Psi, Ssb-c31a, chn, Rbf, snRNP-U1-70K, Max, pcm, dom, Cbp80, Cbp20, mip130, vig, jim, NELF-B, Usp7, Hrs, trsn, mip120, casp, mip40, DMAP1, NC2alpha, MEP-1, Prp3, RnpS1, FBXO11, pad, Nelf-A, rept, krz, Spt5, SMC1, gw, Rbfox1, elav, par-1, AGO1, Acn, sqd, l(3)neo38, kis	GABA-B-R2, GABA-B-R1, SelD
cluster_5	1	GO:0035220	wing disc development	BP	246	55	39.6	1.4	0.47	0.005	0.017	brm, by, Pka-C1, flw, Galphao, Galphas, Hsp27, LanA, peb, px, Btk29A, Su(dx), drk, svr, fs(1)h, mys, ple, Rac1, Cdc42, Nmdar1, cora, heph, Pp2B-14D, mtd, Past1, spen, pcm, dom, Rack1, RhoGEF2, EloB, Fpps, SF1, l(1)G0007, drpr, holn1, Cip4, Wnk, CG8149, Snx3, EloA, Irk2, G9a, Rbfox1, alphaSnap, bun, Dys, par-1, Ppcs, sxc, pyd, CG43427, CG43736, l(3)neo38, kis
cluster_5	1	GO:0010033	response to organic substance	BP	206	47	33.16	1.4	0.5	0.0062	0.021	Pka-C1, dnc, eag, E(bx), Galphas, Hsp67Bc, dlg1, Pfk, rut, Sh, vap, Galphaq, Syn, inaC, Tbh, Cdc42, Nmdar1, dock, CalpA, Arf51F, CASK, alpha-Est7, Lgr1, stumps, Pi3K21B, Cbp80, Cbp20, Ac78C, trio, homer, Pten, Akap200, Hrs, Jwa, Dscam1, Drat, Balat, PHGPx, CG3967, Tk, rept, G9a, CG32638, pzg, whd, AGO1, nwk
cluster_5	1	GO:0019233	sensory perception of pain	BP	271	59	43.62	1.4	0.44	0.0069	0.022	Arr1, E(bx), His2Av, dlg1, pbl, trx, mts, Pep, AP-1-2beta, atms, Ref1, Arp2, CASK, Psi, Mo25, pcm, dom, Trxr-1, l(2)k14710, qkr58E-1, Pdf, Clc, AP-1mu, l(1)G0007, Akap200, Pdha, CG14442, Arp10, CG4887, Phf5a, Wdr82, holn1, Swip-1, U2A, CG1371, Ciao1, Sf3a2, Syx8, CNPYb, CG9636, Tk, RhoGAP93B, CG13623, PQBP1, CG10550, Cpr97Eb, CG7946, c12.1, CG34383, Vps36, 5PtaseI, brp, SNRPG, Vha44, CaMKII, AP-2…
cluster_5	1	GO:0042592	homeostatic process	BP	192	44	30.91	1.4	0.51	0.0074	0.024	Arr1, Arr2, brm, comt, Hex-A, ninaA, ninaC, peb, sesB, Su(var)205, Csp, Galphaq, mys, hep, woc, Fer2LCH, chn, Rack1, Trxr-1, vimar, Rbcn-3A, Srp54, CG4199, CG11007, CG5554, CPT2, Syx17, Miro, CDase, Gyf, Nhe2, mib2, Egm, Pgk, PMCA, Dys, alc, Ppcs, rdgA, norpA, SERCA, hts, SNF4Agamma, rdgC
cluster_5	1	GO:0022603	regulation of anatomical structure morphogenesis	BP	159	37	25.59	1.4	0.53	0.01	0.032	Gbeta13F, Sos, pbl, mts, Galphaq, drk, mys, Rac1, Cdc42, Hem, CASK, Rac2, chn, Abi, RhoGEF2, WASp, trio, DAAM, RhoGAPp190, Pten, morgue, Akap200, Arpc2, Dscam1, CG10068, Sra-1, PIP4K, Vav, G9a, SCAR, Liprin-alpha, sif, cno, par-1, Opa1, pyd, norpA
cluster_5	1	GO:0008092	cytoskeletal protein binding	MF	182	41	29.3	1.4	0.48	0.013	0.038	by, fliI, inaD, spir, alpha-Cat, Map60, cora, atms, jar, Arp2, Arp1, igl, chb, WASp, Cpsf160, Bap60, DAAM, Pten, Eb1, Kap-alpha3, Arp10, Arpc2, Dyb, Abp1, CG17816, CG6834, SCAR, Jupiter, CG32264, Mical, mib2, apolpp, beta-Spec, cno, Dys, CG17528, aPKC, Patronin, hts, Cdep, tau
cluster_5	4	GO:0010558	negative regulation of macromolecule biosynthetic process	BP	163	37	26.24	1.4	0.5	0.016	0.044	gro, Lam, Sce, Su(var)205, fs(1)h, LamC, TH1, simj, heph, Ssb-c31a, chn, Rbf, Max, dom, Cbp80, Cbp20, mip130, jim, NELF-B, Usp7, mip120, mip40, DMAP1, NC2alpha, MEP-1, Prp3, FBXO11, pad, Nelf-A, rept, Spt5, gw, Rbfox1, AGO1, sqd, l(3)neo38, kis	GABA-B-R2, casp, GABA-B-R1
cluster_5	1	GO:0006357	regulation of transcription by RNA polymerase II	BP	179	40	28.81	1.4	0.47	0.016	0.044	brm, E(bx), gro, Sos, dre4, peb, trx, B52, drk, fs(1)h, Taf4, TfIIFalpha, hep, woc, Taf1, TH1, TfIIFbeta, simj, Dp, CalpA, chn, Rbf, Max, mip130, Srp54, Bap60, NELF-B, x16, Hrs, mip120, mip40, NC2alpha, MEP-1, pad, Nelf-A, EloA, Spt5, nwk, SC35, kis
cluster_5	1	GO:0034622	cellular protein-containing complex assembly	BP	159	36	25.59	1.4	0.49	0.018	0.047	comt, E(bx), spir, Btk29A, tra2, Rop, B52, Cdc42, LamC, Nup214, Snap25, Arp2, CanB2, pcm, WASp, Srp54, DAAM, x16, hfp, Tomosyn, Hrs, Arpc2, PI31, NC2alpha, enok, Cip4, FBXO11, RhoGAP92B, SCAR, LSm3, Jupiter, lap, alphaSnap, AGO1, nwk, SC35
cluster_5	1	GO:0033036	macromolecule localization	BP	444	96	71.47	1.3	0.43	0.00074	0.0036	by, Pka-C1, Sap-r, Gbeta13F, DCTN1-p150, His2Av, inaD, dlg1, swm, Lam, Rab32, ninaC, pbl, rb, RanGAP, spir, Su(dx), Syt1, Rop, Gdi, Rab3, CanB, alpha-Cat, Cdc42, AP-1-2beta, LamC, cora, Nup214, jar, Syx1A, Arf51F, Rac2, Hel25E, noi, Hsp60A, alpha-Est7, Rab10, Tim17b2, Cbp80, SmD3, AMPKalpha, Dap160, WASp, Clc, AP-1mu, Pten, Kap-alpha3, Madm, GABA-B-R2, VhaSFD, Akap200, Nup205, CG1724, tho2, Hrs, …
cluster_5	1	GO:0012505	endomembrane system	CC	473	100	76.14	1.3	0.39	0.0013	0.0055	Arr2, comt, Lam, Rab32, ninaA, rb, Syb, Csp, Syt1, Syn, svr, inaC, Gdi, Rab3, CanB, AP-1-2beta, LamC, Nup214, Ref1, nSyb, Syx1A, Arf51F, Fer2LCH, CanB2, Rab10, stnB, stnA, Dap160, Ocrl, Clc, AP-1mu, rush, homer, Kap-alpha3, Madm, Pgant3, Ulp1, Syt4, Tomosyn, CG11178, Nup205, Hrs, CG3702, CG31650, CG4972, Jwa, CG9257, CG1371, O-fut1, Nup62, CG11200, Rbpn-5, Vps20, CG2852, EMC8-9, Golgin245, CG5554…
cluster_5	1	GO:0050793	regulation of developmental process	BP	393	85	63.26	1.3	0.43	0.0015	0.0063	ben, brm, bsk, Pka-C1, Gbeta13F, Galphao, dlg1, Sos, LanA, pbl, Pkc53E, mts, Syt1, Galphaq, Rop, drk, mys, Ac76E, ple, hep, Rac1, Cdc42, simj, Arp2, Dp, Fdx1, Hem, Pp2B-14D, CalpA, Syx1A, CASK, Rac2, chn, rin, RtGEF, Atu, pcm, dom, Abi, Pi3K21B, RhoGEF2, Dap160, WASp, trio, DAAM, RhoGAPp190, Pten, Ulp1, morgue, Akap200, Hrs, lid, Arpc2, Dscam1, enok, Cip4, RhoGAP68F, Abp1, CG10068, Sra-1, RhoGAP9…
cluster_5	1	GO:1990904	ribonucleoprotein complex	CC	350	75	56.34	1.3	0.41	0.0037	0.013	SmF, snf, tra2, nonA, Hrb87F, Pep, B52, Pabp2, Ref1, heph, Hel25E, noi, Psi, rin, Spx, snRNP-U1-70K, U2af38, pcm, Rack1, Cbp80, Cbp20, qkr58E-1, SmD3, vig, Srp54, Neos, SF1, l(1)G0007, x16, hfp, mRpS30, CG3436, Sf3b1, CG4887, Sf3b2, Dim1, Phf5a, CG17768, holn1, CG10333, CG10602, U2A, Sf3b3, CG10418, Sf3a2, mRpL39, U4-U6-60K, CG6841, Prp3, CG9667, CG7483, Pnn, CG6015, PQBP1, mRpS22, CG4849, CG1646…
cluster_5	1	GO:0008104	protein localization	BP	344	73	55.38	1.3	0.4	0.0054	0.019	by, Gbeta13F, DCTN1-p150, His2Av, inaD, dlg1, Lam, ninaC, pbl, rb, RanGAP, Su(dx), Gdi, Rab3, CanB, alpha-Cat, Cdc42, AP-1-2beta, LamC, cora, Nup214, jar, Syx1A, Arf51F, noi, Hsp60A, Rab10, Tim17b2, Dap160, WASp, Clc, AP-1mu, Pten, Kap-alpha3, Madm, GABA-B-R2, Akap200, Nup205, CG1724, Hrs, Hsp60C, Tom70, tomboy40, Golgin245, CG13887, Cip4, CG10103, CG3529, CG7394, CG8004, Tim17a2, Tim17b1, Tim17a…
cluster_5	1	GO:0070727	cellular macromolecule localization	BP	300	64	48.29	1.3	0.41	0.008	0.025	by, Pka-C1, DCTN1-p150, His2Av, Lam, ninaC, pbl, rb, RanGAP, spir, Syt1, Rop, CanB, alpha-Cat, Cdc42, AP-1-2beta, LamC, cora, Nup214, Syx1A, noi, Hsp60A, Tim17b2, SmD3, WASp, Clc, AP-1mu, Pten, Kap-alpha3, Nup205, CG1724, Hrs, Hsp60C, Tom70, tomboy40, Golgin245, CG13887, Cip4, CG3529, CG7394, CG8004, Tim17a2, Tim17b1, CG7483, Tim17a1, Snx3, RhoGAP92B, RanBP3, AP-1sigma, tamo, btz, tum, alphaSnap,…
cluster_5	1	GO:0002376	immune system process	BP	212	46	34.13	1.3	0.43	0.017	0.045	brm, bsk, E(bx), DCTN1-p150, Lam, LanA, Pkc53E, Pp1alpha-96A, Galphaq, mys, hep, Rac1, Cdc42, mtd, Rac2, Fer2LCH, Atu, dom, chb, SmD3, Pli, Pten, Eb1, Ulp1, Tollo, RluA-2, CG10333, casp, DMAP1, RhoBTB, CG9636, CG8149, Npc2g, Vav, krz, G9a, CG32795, Rrp40, par-1, Exn, LanB1, aPKC, norpA, RhoGEF3, Nrg, kis
cluster_5	1	GO:0006468	protein phosphorylation	BP	208	45	33.48	1.3	0.43	0.019	0.05	ben, bsk, Pka-C1, flw, Hsp67Bc, ninaC, peb, Pkc53E, Btk29A, Pp1-87B, drk, inaC, hep, Rac1, Cdc42, Taf1, Ror, Cdc37, CASK, Rac2, CaMKI, Abi, Pi3K21B, gek, AMPKalpha, Dap160, SRPK, RhoGAP5A, Hrs, Strip, Sf3a2, Wnk, aux, CG7483, CG4849, CG17698, krz, Pak3, cno, par-1, alc, CG17528, aPKC, pyd, CaMKII
cluster_7	4	GO:0030008	TRAPP complex	CC	7	5	0.36	13.93	3.8	6.6e-06	0.00029	Bet3, Bet5, Trs23, Trs31, Trs20	Rab1, Rab14, ldlCp, zetaCOP, car
cluster_7	4	GO:0006364	rRNA processing	BP	29	12	1.49	8.06	3	5.9e-09	3.5e-07	Nnp-1, CG3071, nop5, CG5033, CG8939, CG4364, CG6724, CG8545, CG8414, CG5728, CG1542, Nop60B	loqs, Elp1, TyrRS
cluster_7	2	GO:0042254	ribosome biogenesis	BP	56	18	2.88	6.28	2.6	1.1e-10	2e-08	Rs1, Nnp-1, CG3071, nop5, CG5033, CG8939, CG4364, CG6724, CG6712, RpLP0-like, CG8545, CG8414, CG11583, RpL24-like, CG5728, CG7006, CG1542, Nop60B
cluster_7	1	GO:0005730	nucleolus	CC	81	21	4.16	5.06	2.3	2.8e-10	2.5e-08	FK506-bp1, CG3071, nop5, Non1, CG5033, CG12608, CG8939, CG4364, CG6724, CG6712, CG9246, CG8545, Ns2, CG11583, CG5641, Non3, RpI12, CG5728, CG1542, Nop60B, pit
cluster_7	9	GO:0040018	positive regulation of multicellular organism growth	BP	36	9	1.85	4.86	2.3	5.9e-05	0.0021	Pkc98E, Rs1, CG5033, CG8939, Ns2, CG11583, RIOK1, RpL24-like, CG7006	shi, caz, srl, fwe, Rab1
cluster_7	6	GO:0008186	RNA-dependent ATPase activity	MF	26	6	1.34	4.5	2.2	0.0017	0.037	Rs1, CG9253, CG9143, CG5589, CG32344, pit	CG5800
cluster_7	1	GO:0006396	RNA processing	BP	264	25	13.56	1.84	0.88	0.0019	0.037	Hrb98DE, Bx42, caz, Nnp-1, CG3071, nop5, CG5033, CG8939, CG4364, CG6724, CG6686, loqs, tsu, CG8545, CG8414, Rrp4, CG3808, CRIF, Elp1, CG5641, CG5728, CG1542, Sf3b5, Nop60B, Zn72D
cluster_7	1	GO:0003723	RNA binding	MF	343	31	17.61	1.77	0.82	0.0011	0.029	Hrb98DE, caz, Srp19, peng, qkr58E-2, CG3071, mEFTu1, TyrRS, CG13096, CG6686, CG6712, loqs, tsu, CG8545, CG8778, CG9143, Rrp4, CG11583, eIF3l, CG5589, CG3808, srl, CG5641, CG5728, CG7006, CG1542, HBS1, CG32344, Nop60B, Zn72D, spoon
cluster_7	3	GO:0043233	organelle lumen	CC	470	40	24.13	1.66	0.73	0.0007	0.021	RpII215, Bx42, caz, FK506-bp1, Spat, HDAC1, Oat, CG3071, nop5, MRG15, Non1, CG5033, CG12608, CG8939, mRpL22, Elp3, CG10399, CG4364, CG6724, CG6712, CG9246, CG8545, Ns2, Rrp4, CG11583, CG6638, srl, Elp1, CG5641, UQCR-C1, Non3, RpI12, CG5728, CG5028, CG1542, Mccc1, Adk3, Atg8a, Nop60B, pit
cluster_2	1	GO:0017101	aminoacyl-tRNA synthetase multienzyme complex	CC	9	5	0.74	6.8	2.8	0.00034	0.01	IleRS, GlnRS, ArgRS, AIMP1, MetRS
cluster_2	4	GO:0005839	proteasome core complex	CC	24	13	1.97	6.6	2.7	6.5e-09	2.4e-06	Prosalpha4, Prosalpha4T2, Prosbeta2, Prosbeta3, Prosbeta4R1, Prosbeta4R2, Prosalpha6T, Prosbeta4, Prosbeta5R1, CG30382, Prosbeta5R2, Prosalpha3, Prosalpha4T1	cathD, rho-4, CG7791, CG17475, Jon65Aiv
cluster_2	1	GO:0019773	proteasome core complex, alpha-subunit complex	CC	12	6	0.98	6.1	2.6	0.00017	0.0061	Prosalpha4, Prosalpha4T2, Prosalpha6T, CG30382, Prosalpha3, Prosalpha4T1
cluster_2	3	GO:0042157	lipoprotein metabolic process	BP	10	5	0.82	6.1	2.6	0.00064	0.017	PIG-K, GAA1, Ppt1, PIG-U, Atg7	cert, Gba1a, Spt-I, Las, ADPS
cluster_2	3	GO:0000502	proteasome complex	CC	59	20	4.83	4.1	2	1.5e-08	2.8e-06	Prosalpha4, Prosalpha4T2, Prosbeta2, Prosbeta3, Rpn9, Rpn1, REG, Prosbeta4R1, Prosbeta4R2, Prosalpha6T, Prosbeta4, Prosbeta5R1, Rpt4R, Rpn12R, CG12321, Rpt6R, CG30382, Prosbeta5R2, Prosalpha3, Prosalpha4T1
cluster_2	6	GO:0043039	tRNA aminoacylation	BP	27	9	2.21	4.1	2	0.00019	0.0061	TrpRS, IleRS, HisRS, GlyRS, GlnRS, ArgRS, alpha-PheRS, MetRS, IleRS-m	Nsun2, RNaseZ
cluster_2	2	GO:0043161	proteasome-mediated ubiquitin-dependent protein catabolic process	BP	70	16	5.73	2.8	1.5	0.00012	0.0048	Prosalpha4, Prosalpha4T2, Prosbeta2, Prosbeta3, CSN5, Rpn9, Rpn1, Prosbeta4, Prosbeta5R1, Rpt4R, Rpt6R, wds, CG30382, Prosbeta5R2, Prosalpha3, Prosalpha4T1	REG
cluster_2	1	GO:0016874	ligase activity	MF	77	17	6.31	2.7	1.4	0.00012	0.0048	r, TrpRS, IleRS, HisRS, GlyRS, GlnRS, ArgRS, Uba2, Las, alpha-PheRS, Atg7, MetRS, IleRS-m, CG3961, Gclc, APP-BP1, Uba3
cluster_2	6	GO:0006511	ubiquitin-dependent protein catabolic process	BP	121	26	9.91	2.6	1.4	3.1e-06	0.00022	Prosalpha4, Usp47, Prosalpha4T2, Vps28, Prosbeta2, SkpA, Prosbeta3, CSN5, Rpn9, Rpn1, Prosbeta4R1, Prosbeta4R2, CG9934, Prosalpha6T, Prosbeta4, Prosbeta5R1, Rpt4R, Rpn12R, Npl4, Rpt6R, wds, CG30382, Prosbeta5R2, ALiX, Prosalpha3, Prosalpha4T1	Uba2, SAK, REG
cluster_2	2	GO:0044265	cellular macromolecule catabolic process	BP	164	33	13.43	2.5	1.3	6.8e-07	8.3e-05	Prosalpha4, Usp47, Prosalpha4T2, Vps28, Prosbeta2, SkpA, Prosbeta3, CSN5, Rpn9, Rpn1, Uba2, REG, Upf2, Zpr1, Upf1, Prosbeta4R1, Prosbeta4R2, CG9934, Prosalpha6T, Prosbeta4, Pngl, Prosbeta5R1, Rpt4R, Rpn12R, CG2091, Npl4, Rpt6R, wds, CG30382, Prosbeta5R2, ALiX, Prosalpha3, Prosalpha4T1	SAK, Ppt1, CG8460
cluster_2	1	GO:0006520	cellular amino acid metabolic process	BP	81	16	6.64	2.4	1.3	0.0007	0.017	r, TrpRS, aay, IleRS, HisRS, GlyRS, GlnRS, ArgRS, alpha-PheRS, CG4968, CG12264, MetRS, IleRS-m, CG12173, CG17109, CG6733
cluster_2	2	GO:0070011	peptidase activity, acting on L-amino acid peptides	MF	145	27	11.88	2.3	1.2	3.3e-05	0.002	Prosalpha4, Usp47, Prosalpha4T2, Prosbeta2, Prosbeta3, CSN5, cathD, CG3097, rho-4, Prosbeta4R1, Prosbeta4R2, CG11034, CG4968, Prosalpha6T, Prosbeta4, CG7791, Prosbeta5R1, CG14820, CG9953, CG17475, CG2224, CG30382, Prosbeta5R2, ALiX, Jon65Aiv, Prosalpha3, Prosalpha4T1	PIG-K
cluster_2	7	GO:0009267	cellular response to starvation	BP	73	14	5.98	2.3	1.2	0.002	0.043	Ras85D, Pi3K59F, NHP2, CG13097, CG7637, CG12325, Atg7, eIF6, CG7728, Atg3, Ns1, Nop56, CG30349, l(2)k09022	Ggamma1, Itp-r83A, p38a, Thor
cluster_2	1	GO:0006508	proteolysis	BP	269	45	22.04	2	1	1.6e-06	0.00014	Prosalpha4, Usp47, Prosalpha4T2, Vps28, Prosbeta2, PIG-K, SkpA, Prosbeta3, CSN5, CSN1b, Rpn9, Rpn1, CSN6, Spn42Dd, cathD, Uba2, REG, CG3097, rho-4, Prosbeta4R1, Prosbeta4R2, CG11034, CG4968, CG9934, Prosalpha6T, Prosbeta4, CG7791, eIF3m, Prosbeta5R1, CG14820, CG9953, Rpt4R, Rpn12R, CG17475, Npl4, CG2224, Rpt6R, wds, CG30382, Prosbeta5R2, ALiX, Jon65Aiv, Prosalpha3, Pde1c, Prosalpha4T1
cluster_2	2	GO:1901575	organic substance catabolic process	BP	296	44	24.25	1.8	0.86	4.8e-05	0.0025	Gpdh1, Prosalpha4, Usp47, Prosalpha4T2, Vps28, Prosbeta2, SkpA, SAK, Prosbeta3, CSN5, CG5009, Rpn9, Rpn1, Uba2, REG, Upf2, Ppt1, Zpr1, Upf1, Lsd-2, Prosbeta4R1, Prosbeta4R2, CG9961, CG8460, CG9934, Prosalpha6T, Prosbeta4, Pngl, Prosbeta5R1, cN-IIIB, Fuca, Rpt4R, Rpn12R, CG2091, Npl4, CG6295, Rpt6R, wds, Hex-t2, CG30382, Prosbeta5R2, ALiX, Prosalpha3, Prosalpha4T1	Prx3
cluster_2	1	GO:0044248	cellular catabolic process	BP	255	36	20.89	1.7	0.79	0.00068	0.017	Prosalpha4, Usp47, Prosalpha4T2, Vps28, Prosbeta2, SkpA, Prosbeta3, CSN5, CG5009, Rpn9, Rpn1, Uba2, REG, Upf2, Zpr1, Upf1, Prosbeta4R1, Prosbeta4R2, CG9934, Prosalpha6T, Prosbeta4, Pngl, Prosbeta5R1, cN-IIIB, Rpt4R, Rpn12R, CG2091, Prx3, Npl4, Rpt6R, wds, CG30382, Prosbeta5R2, ALiX, Prosalpha3, Prosalpha4T1
cluster_2	1	GO:0033554	cellular response to stress	BP	339	44	27.77	1.6	0.66	0.0011	0.025	cact, Jra, Ras85D, raw, Prosalpha4, unc-45, Cdk5, Rho1, Pi3K59F, p38a, Prosbeta2, SkpA, Prosbeta3, CSN5, CSN1b, CSN6, NHP2, Upf1, Pvr, CG13097, Prosalpha6T, Prosbeta4, CG7637, CG12325, Atg7, CG11475, eIF6, CG8993, Rpt4R, CG7728, Atg3, CG5844, Ns1, Nop56, dj-1beta, wds, Gclc, Gclm, CG30349, CG30382, Gba1a, Prosbeta5R2, ALiX, l(2)k09022
cluster_3	1	GO:0008541	proteasome regulatory particle, lid subcomplex	CC	9	7	0.78	8.9	3.2	1.1e-06	3.2e-05	Rpn8, Rpn7, Rpn5, Rpn12, Rpn11, Rpn13, Rpn3
cluster_3	2	GO:0005838	proteasome regulatory particle	CC	24	14	2.09	6.7	2.7	1e-09	1.7e-07	Rpn8, Rpn10, Rpt6, Rpt4, Rpt3, Rpt1, Rpn7, Rpn5, Rpn2, Rpn12, Rpn11, Rpn13, CG9588, Rpn3
cluster_3	1	GO:0008540	proteasome regulatory particle, base subcomplex	CC	11	6	0.96	6.3	2.6	0.00013	0.0016	Rpn10, Rpt6, Rpt4, Rpt3, Rpt1, Rpn2
cluster_3	4	GO:0006536	glutamate metabolic process	BP	11	5	0.96	5.2	2.4	0.0015	0.012	Gdh, Got2, slgA, CG8745, CG9674	Menl-1, SdhC, Ddc, Dhfr, Trh
cluster_3	3	GO:0042558	pteridine-containing compound metabolic process	BP	11	5	0.96	5.2	2.4	0.0015	0.012	pr, Dhfr, Nmdmc, Fpgs, DhpD	AcCoAS, CG2453, Ppox
cluster_3	9	GO:0061136	regulation of proteasomal protein catabolic process	BP	13	5	1.13	4.4	2.1	0.0035	0.025	sgg, Rad23, Usp2, Ufd1-like, TER94	GlyP, Rpn2, Fsn, Rpn3
cluster_3	8	GO:0045277	respiratory chain complex IV	CC	13	5	1.13	4.4	2.1	0.0035	0.025	mt:CoI, mt:CoIII, COX6B, COX5B, COX4L	UQCR-14L, Cyt-c1L, UQCR-11L, Fdx2, SdhC
cluster_3	1	GO:0016052	carbohydrate catabolic process	BP	22	8	1.92	4.2	2.1	0.00033	0.0034	Eno, Gapdh2, Ldh, Pgi, GlyP, PhKgamma, fbp, Tpi
cluster_3	1	GO:0051087	chaperone binding	MF	14	5	1.22	4.1	2	0.0051	0.035	Roe1, HIP-R, Pfdn6, CG11779, Hsc70-4
cluster_3	8	GO:0050136	NADH dehydrogenase (quinone) activity	MF	26	9	2.27	4	2	0.00022	0.0025	mt:ND1, mt:ND2, mt:ND3, mt:ND4L, mt:ND5, ND-23, ND-B22, ND-B14.5AL, mt:ND4	NP15.6, ND-B8, ECSIT, CG5946, CG9471
cluster_3	3	GO:0070469	respiratory chain	CC	63	21	5.49	3.8	1.9	2.9e-08	1.6e-06	mt:CoI, mt:CoIII, mt:ND1, mt:ND2, mt:ND3, mt:ND4L, mt:ND5, ND-23, NP15.6, COX6B, COX5B, ND-B22, COX4L, ND-B14.5AL, SdhC, UQCR-14L, Cyt-c1L, ND-B8, UQCR-11L, SdhA, mt:ND4
cluster_3	9	GO:0045727	positive regulation of translation	BP	18	6	1.57	3.8	1.9	0.0032	0.023	Hrb27C, Dp1, eEF5, Atx2, eIF4E3, pAbp	eIF3k, eIF3d2, Rpt4, Fdx2, Nup98-96, pont
cluster_3	5	GO:0000502	proteasome complex	CC	59	19	5.14	3.7	1.9	2.5e-07	9.5e-06	Rpn8, Rpn10, Rpt6, Rpt4, Rpt3, Rpt1, Rpn7, Rpn5, Rpn2, Rpn12, Rpn11, Rpn13, Ufd1-like, CG9588, Prosalpha2, Prosbeta7, Prosalpha6, TER94, Rpn3	sgg, Rad23, Usp2, Fsn
cluster_3	6	GO:0030018	Z disc	CC	22	7	1.92	3.7	1.9	0.0019	0.015	Actn, CG14207, Zasp66, Tpi, zip, Zasp52, Hsc70-4	Chd64, wupA
cluster_3	1	GO:0051082	unfolded protein binding	MF	43	13	3.75	3.5	1.8	4.4e-05	0.00067	Hsc70-5, l(2)tid, Calr, Roe1, Cnx99A, Stip1, CCT2, shv, Pfdn1, Pfdn6, CG12279, Pfdn5, Hsc70-4
cluster_3	1	GO:0045169	fusome	CC	30	9	2.62	3.4	1.8	0.00072	0.007	sgg, Calr, Cp1, CLIP-190, Plap, l(1)G0320, Sec63, tmod, TER94
cluster_3	3	GO:0003743	translation initiation factor activity	MF	49	14	4.27	3.3	1.7	4.5e-05	0.00067	eIF2Bepsilon, eIF2Bbeta, eIF2Bgamma, eIF3k, eIF2Bdelta, eEF5, eIF1, eIF4E4, eIF4E5, eIF3d2, eIF3g2, eIF4H2, eIF4E7, eIF4E3	pix, eEF1alpha2, eEF2, mEFTu2
cluster_3	3	GO:0098800	inner mitochondrial membrane protein complex	CC	97	27	8.46	3.2	1.7	2.4e-08	1.6e-06	mt:ATPase6, mt:CoI, mt:CoIII, mt:ND1, mt:ND2, mt:ND3, mt:ND4L, mt:ND5, ND-23, NP15.6, Tim9a, COX6B, CG7382, COX5B, ND-B22, COX4L, ATPsynCF6L, ND-B14.5AL, SdhC, CG11779, UQCR-14L, Cyt-c1L, ND-B8, UQCR-11L, CG31229, SdhA, mt:ND4	Mpc1, Nc73EF, Thiolase
cluster_3	1	GO:0006457	protein folding	BP	68	19	5.93	3.2	1.7	2.9e-06	6.5e-05	Hsc70-5, Hsp26, l(2)tid, Calr, Roe1, Cnx99A, CG2918, Stip1, HIP-R, CCT2, CG14207, shv, Pfdn1, ERp60, Pfdn6, CG12279, Pfdn5, mgr, Hsc70-4
cluster_3	5	GO:0000315	organellar large ribosomal subunit	CC	29	8	2.53	3.2	1.7	0.0026	0.02	mRpL12, mRpL50, mRpL38, mRpL51, mRpL15, mRpL19, mRpL9, mRpL14	CG4679, mRpS17, mRpS35, mRpS5
cluster_3	2	GO:0045333	cellular respiration	BP	89	24	7.76	3.1	1.6	2.8e-07	9.7e-06	Gdh, Acon, Nc73EF, mt:CoI, mt:CoIII, mt:ND2, mt:ND4L, mt:ND5, ND-23, NP15.6, Rim2, COX5B, ND-B22, COX4L, ND-B14.5AL, SdhC, UQCR-14L, Cyt-c1L, CG1544, ND-B8, UQCR-11L, SdhA, kdn, mt:ND4	GlyP, PhKgamma
cluster_3	1	GO:1990204	oxidoreductase complex	CC	62	17	5.4	3.1	1.6	1.3e-05	0.00024	Nc73EF, mt:ND1, mt:ND2, mt:ND3, mt:ND4L, mt:ND5, ND-23, NP15.6, ND-B22, ND-B14.5AL, SdhC, UQCR-14L, Cyt-c1L, ND-B8, UQCR-11L, SdhA, mt:ND4
cluster_3	4	GO:0042773	ATP synthesis coupled electron transport	BP	58	15	5.06	3	1.6	8.7e-05	0.0011	mt:CoI, mt:ND2, mt:ND4L, mt:ND5, ND-23, COX5B, ND-B22, COX4L, ND-B14.5AL, SdhC, UQCR-14L, Cyt-c1L, ND-B8, UQCR-11L, mt:ND4	mt:CoIII, NP15.6, SdhA
cluster_3	1	GO:0006091	generation of precursor metabolites and energy	BP	127	31	11.07	2.8	1.5	6.3e-08	3.1e-06	Eno, Gapdh2, Gdh, Ldh, Pgi, GlyP, Acon, Nc73EF, PhKgamma, mt:CoI, mt:CoIII, mt:ND2, mt:ND4L, mt:ND5, ND-23, NP15.6, Rim2, COX5B, ND-B22, COX4L, ND-B14.5AL, SdhC, UQCR-14L, Cyt-c1L, CG1544, ND-B8, UQCR-11L, Tpi, SdhA, kdn, mt:ND4
cluster_3	4	GO:0005743	mitochondrial inner membrane	CC	127	30	11.07	2.7	1.4	2.3e-07	9.5e-06	mt:ATPase6, mt:CoI, mt:CoIII, mt:ND1, mt:ND2, mt:ND3, mt:ND4L, mt:ND5, ND-23, Ppox, NP15.6, Tim9a, COX6B, CG7382, COX5B, ND-B22, COX4L, ATPsynCF6L, ND-B14.5AL, SdhC, Mpc1, CG11779, UQCR-14L, Cyt-c1L, ND-B8, UQCR-11L, CG31229, SdhA, mt:ND4, Hsc70-4	Rim2, HtrA2, CG1544
cluster_3	17	GO:0046034	ATP metabolic process	BP	99	23	8.63	2.7	1.4	8.3e-06	0.00017	Eno, Gapdh2, Ldh, Pgi, Vha55, mt:ATPase6, mt:CoI, mt:ND2, mt:ND4L, mt:ND5, ND-23, COX5B, ND-B22, COX4L, ATPsynCF6L, ND-B14.5AL, SdhC, UQCR-14L, Cyt-c1L, ND-B8, UQCR-11L, Tpi, mt:ND4	r-l, CG17224, Dhfr, Zw
cluster_3	1	GO:0005811	lipid droplet	CC	170	39	14.82	2.6	1.4	7.5e-09	6.4e-07	Act5C, Act87E, Chc, eEF1alpha2, eEF2, Eno, Gapdh2, Got2, Hsc70-3, Hsc70-5, Pgi, Yp1, Yp3, Yp2, Calr, Acon, mRpL12, Ost48, Ran, CG2918, Thiolase, Dp1, l(1)G0320, CCT2, regucalcin, Nup35, COX5B, fon, ERp60, Hsl, Tudor-SN, Cpr64Ad, Nup358, TER94, cu, Fs(2)Ket, pAbp, Mtp, Hsc70-4
cluster_3	2	GO:0006732	coenzyme metabolic process	BP	63	14	5.49	2.5	1.4	0.00081	0.0077	Eno, Gapdh2, Gdh, Ldh, Pgi, pr, Zw, Dhfr, Nmdmc, AcCoAS, Fpgs, CG2453, CG1774, Tpi	Ppox, Ho
cluster_3	1	GO:0042775	mitochondrial ATP synthesis coupled electron transport	BP	54	12	4.71	2.5	1.4	0.0019	0.015	mt:CoI, mt:ND2, ND-23, COX5B, ND-B22, COX4L, SdhC, UQCR-14L, Cyt-c1L, ND-B8, UQCR-11L, mt:ND4
cluster_3	8	GO:0006511	ubiquitin-dependent protein catabolic process	BP	121	25	10.55	2.4	1.2	3e-05	0.00051	Rpn8, sgg, Rpn10, Rpt6, Vps25, Rad23, Rpt4, Rpt3, Rpt1, Rpn7, Rpn5, Rpn2, Rpn12, Rpn11, Usp2, Usp14, Cul2, Rpn13, Ufd1-like, Fsn, Prosalpha2, Prosbeta7, Prosalpha6, TER94, Rpn3	GlyP, Cp1, Dis3, pix, cu
cluster_3	2	GO:0007507	heart development	BP	48	10	4.18	2.4	1.3	0.0072	0.047	Act57B, rl, sgg, betaTub60D, Lac, Nrx-IV, nrv2, Acer, Fit2, wupA
cluster_3	1	GO:0044429	mitochondrial part	CC	259	52	22.58	2.3	1.2	3.1e-09	3.5e-07	Gdh, Got2, slgA, Nc73EF, mRpL12, mt:ATPase6, mt:CoI, mt:CoIII, mt:ND1, mt:ND2, mt:ND3, mt:ND4L, mt:ND5, Roe1, ND-23, Ppox, Thiolase, NP15.6, mRpL50, Tim9a, mRpL38, COX6B, Rim2, CG7382, COX5B, mRpL51, ND-B22, COX4L, mRpS17, mRpS35, Fdx2, ATPsynCF6L, mRpL15, ND-B14.5AL, mRpL19, SdhC, HtrA2, mRpL9, Mpc1, CG11779, UQCR-14L, Cyt-c1L, CG1544, mRpL14, ND-B8, mRpS5, UQCR-11L, CG31229, SdhA, kdn, mt:ND4, …
cluster_3	1	GO:0007005	mitochondrion organization	BP	125	25	10.9	2.3	1.2	5.3e-05	0.00076	Hsc70-5, Sod1, mRpL12, mt:CoI, Roe1, mRpL50, Tim9a, mRpL38, COX6B, Rim2, CG7382, mRpL51, CG4679, mRpS17, mRpS35, mRpL15, mRpL19, CG11722, HtrA2, mRpL9, CG11779, UQCR-14L, mRpL14, mRpS5, CG31229
cluster_3	1	GO:0005739	mitochondrion	CC	392	74	34.17	2.2	1.1	1.7e-11	5.7e-09	Gdh, Got2, Hsc70-5, l(2)tid, slgA, Acon, Nmdmc, Nc73EF, mRpL12, mt:ATPase6, mt:CoI, mt:CoIII, mt:ND1, mt:ND2, mt:ND3, mt:ND4L, mt:ND5, pnut, Roe1, ND-23, Ppox, TppII, CG2658, Thiolase, LysRS, NP15.6, ECSIT, mRpL50, Menl-1, sicily, Fpgs, CG2453, Tim9a, mRpL38, COX6B, Rim2, CG7382, COX5B, mRpL51, ND-B22, COX4L, mEFTu2, CG4679, Rae1, mRpS17, mRpS35, Fdx2, ATPsynCF6L, GstO2, CG8745, mRpL15, ND-B14.5A…
cluster_3	4	GO:0009117	nucleotide metabolic process	BP	164	31	14.3	2.2	1.1	2.2e-05	0.00039	Eno, Gapdh2, Gdh, Ldh, Pgi, r-l, Zw, Dhfr, Vha55, mt:ATPase6, mt:CoI, mt:ND2, mt:ND4L, mt:ND5, ND-23, AdSS, Dak1, CG17224, COX5B, ND-B22, COX4L, ATPsynCF6L, CG11811, ND-B14.5AL, SdhC, UQCR-14L, Cyt-c1L, ND-B8, UQCR-11L, Tpi, mt:ND4	CG17029, DhpD
cluster_3	2	GO:0006163	purine nucleotide metabolic process	BP	135	26	11.77	2.2	1.1	7.4e-05	0.001	Eno, Gapdh2, Ldh, Pgi, Dhfr, Vha55, mt:ATPase6, mt:CoI, mt:ND2, mt:ND4L, mt:ND5, ND-23, AdSS, COX5B, ND-B22, COX4L, ATPsynCF6L, CG11811, ND-B14.5AL, SdhC, UQCR-14L, Cyt-c1L, ND-B8, UQCR-11L, Tpi, mt:ND4	DhpD
cluster_3	2	GO:0031975	envelope	CC	239	44	20.83	2.1	1.1	7.9e-07	2.5e-05	mt:ATPase6, mt:CoI, mt:CoIII, mt:ND1, mt:ND2, mt:ND3, mt:ND4L, mt:ND5, ND-23, Ppox, Nup154, NP15.6, Tim9a, Nup35, COX6B, Rim2, CG7382, COX5B, baf, ND-B22, COX4L, Nup50, Rae1, ATPsynCF6L, ND-B14.5AL, bocks, SdhC, HtrA2, Mpc1, CG11779, Nup98-96, Nup358, UQCR-14L, Cyt-c1L, CG1544, ND-B8, UQCR-11L, CG31229, TER94, SdhA, Fs(2)Ket, mt:ND4, Gp210, Hsc70-4
cluster_3	1	GO:0005759	mitochondrial matrix	CC	102	19	8.89	2.1	1.1	0.0011	0.0095	Gdh, Got2, slgA, Nc73EF, mRpL12, Roe1, Thiolase, mRpL50, mRpL38, mRpL51, mRpS17, mRpS35, Fdx2, mRpL15, mRpL19, mRpL9, mRpL14, mRpS5, kdn
cluster_3	1	GO:0006914	autophagy	BP	93	16	8.11	2	0.98	0.0059	0.04	Hsc70-5, rl, Sod1, Ubi-p63E, Tor, Vps25, Uba1, CG18304, Atg9, Rae1, Snap29, RagA-B, wrd, Lerp, TER94, Hsc70-4
cluster_3	5	GO:0006412	translation	BP	289	49	25.19	1.9	0.96	2.3e-06	5.9e-05	eEF1alpha2, eEF2, AspRS, RpS14b, Hrb27C, GluProRS, mRpL12, RpL9, eIF2Bepsilon, eIF2Bbeta, LysRS, AlaRS, Dp1, mRpL50, mRpL38, RpL36A, mRpL51, mEFTu2, RpS11, CG4679, eIF2Bgamma, eIF3k, RpS16, RpL37b, RpL22-like, eIF2Bdelta, eEF5, mRpS17, mRpS35, eIF1, eIF4E4, eIF4E5, mRRF1, mRpL15, mRpL19, eIF3d2, mRpL9, eIF3g2, RpS19b, eIF4H2, eIF4E7, mRpL14, Atx2, mRpS5, RpL5, pix, RpS29, eIF4E3, pAbp	GstD2, CG4829, GstO2
cluster_3	1	GO:0005198	structural molecule activity	MF	290	49	25.28	1.9	0.95	2.5e-06	6.1e-05	Act5C, Act42A, Act57B, Act87E, Act88F, Chc, Cp15, Cp19, Cp36, Cp38, Arpc1, betaTub60D, Yp1, Yp3, RpS14b, Ccp84Ae, Ccp84Ab, Yp2, mRpL12, RpL9, Nup154, Vps25, mRpL50, CG15772, Cpr11B, mRpL38, RpL36A, mRpL51, Cpr47Ef, RpS11, Cpr56F, Cpr57A, RpS16, RpL37b, RpL22-like, mRpS17, mRpS35, Cpr64Aa, Cpr64Ad, zye, mRpL15, mRpL19, mRpL9, RpS19b, Cpr100A, mRpL14, mRpS5, RpL5, RpS29
cluster_3	2	GO:1901575	organic substance catabolic process	BP	296	49	25.8	1.9	0.93	4.6e-06	9.8e-05	Eno, Gapdh2, Gdh, Ldh, Rpn8, Pgi, sgg, slgA, GlyP, PhKgamma, Cp1, Rpn10, Rpt6, Vps25, Thiolase, Rad23, Rpt4, Rpt3, Rpt1, Rpn7, Rpn5, Rpn2, Rpn12, Rpn11, Usp2, CG17224, Usp14, fbp, CG9319, Cul2, Rpn13, Hsl, Ufd1-like, CG8745, CG17029, CRAT, Ho, Dis3, CG12428, Fsn, Prosalpha2, Tpi, pix, Prosbeta7, Prosalpha6, TER94, Rpn3, DhpD, cu	Jafrac1
cluster_3	2	GO:0005875	microtubule associated complex	CC	252	41	21.97	1.9	0.9	4.5e-05	0.00067	Act5C, Act42A, Act57B, eEF2, Gapdh2, Hsc70-3, Hsc70-5, Hsp26, AspRS, r-l, Ubi-p63E, Yp1, Yp3, tws, Yp2, RpA-70, Nc73EF, pnut, 14-3-3epsilon, Ran, Rpt6, CLIP-190, Thiolase, LysRS, Rpt4, Rpn11, CCT2, Usp14, ERp60, Tudor-SN, fabp, Nup358, pont, Jafrac1, Sdic1, Prosalpha6, TER94, kdn, Fs(2)Ket, pAbp, Hsc70-4	sgg, betaTub60D, dnd
cluster_3	1	GO:0044248	cellular catabolic process	BP	255	40	22.23	1.8	0.85	0.00013	0.0016	Gdh, Rpn8, sgg, slgA, GlyP, Rpn10, Rpt6, Vps25, Thiolase, Rad23, Rpt4, Rpt3, Rpt1, Rpn7, Rpn5, Rpn2, Rpn12, Rpn11, Usp2, CG17224, Usp14, CG9319, Cul2, Rpn13, Ufd1-like, CG8745, CRAT, Ho, Dis3, CG12428, Jafrac1, Fsn, Prosalpha2, pix, Prosbeta7, Prosalpha6, TER94, Rpn3, DhpD, cu
cluster_3	3	GO:0044391	ribosomal subunit	CC	135	21	11.77	1.8	0.84	0.0059	0.04	RpS14b, mRpL12, RpL9, mRpL50, mRpL38, RpL36A, mRpL51, RpS11, RpS16, RpL37b, RpL22-like, mRpS17, mRpS35, mRpL15, mRpL19, mRpL9, RpS19b, mRpL14, mRpS5, RpL5, RpS29
cluster_3	1	GO:0055114	oxidation-reduction process	BP	329	49	28.68	1.7	0.77	8.6e-05	0.0011	Gapdh2, Gdh, Ldh, Sod1, Zw, Dhfr, GlyP, Acon, Nmdmc, Nc73EF, Ccs, PhKgamma, mt:CoI, mt:CoIII, mt:ND1, mt:ND2, mt:ND3, mt:ND4L, mt:ND5, ND-23, Ppox, Thiolase, NP15.6, Menl-1, CG9914, Rim2, COX5B, ND-B22, CG9319, COX4L, Trh, CG6083, CG5946, CG9674, ND-B14.5AL, CRAT, SdhC, Ho, GILT1, CG12428, UQCR-14L, Cyt-c1L, CG1544, Jafrac1, ND-B8, UQCR-11L, SdhA, kdn, mt:ND4
cluster_3	1	GO:0016491	oxidoreductase activity	MF	334	48	29.12	1.6	0.72	0.00025	0.0027	Gapdh2, Gdh, Ldh, Pgi, slgA, Sod1, Zw, Dhfr, GstD2, Nmdmc, Nc73EF, Ccs, mt:CoI, mt:CoIII, mt:ND1, mt:ND2, mt:ND3, mt:ND4L, mt:ND5, ND-23, Ppox, Thiolase, ECSIT, Menl-1, CG3842, CG9914, COX6B, COX5B, ND-B22, COX4L, Trh, GstO2, Dhpr, CG6083, CG5946, CG9674, ND-B14.5AL, CG9471, SdhC, Ho, GILT1, UQCR-14L, CG1544, Jafrac1, ND-B8, UQCR-11L, SdhA, mt:ND4
cluster_3	1	GO:1902494	catalytic complex	CC	371	52	32.34	1.6	0.69	0.00026	0.0027	Act5C, Act87E, Eno, Rpn8, sa, tws, Nc73EF, PhKgamma, mt:ND1, mt:ND2, mt:ND3, mt:ND4L, mt:ND5, Rpn10, nrv2, ND-23, Rpt6, Sin3A, NP15.6, Rpt4, Rpt3, Rpt1, Rpn7, Rpn5, Rpn2, Rpn12, Rpn11, ND-B22, nrv3, Cul2, Rpn13, Ufd1-like, CG9330, ND-B14.5AL, SdhC, CG9588, UQCR-14L, Cyt-c1L, pont, ND-B8, wrd, Fsn, UQCR-11L, Sdic1, Prosalpha2, IKKepsilon, Prosbeta7, Prosalpha6, TER94, Rpn3, SdhA, mt:ND4
cluster_3	2	GO:0044430	cytoskeletal part	CC	370	51	32.25	1.6	0.66	0.00045	0.0045	Act5C, Act42A, Act57B, Act87E, Act88F, eEF2, Gapdh2, Hsc70-3, Hsc70-5, Hsp26, Arpc1, AspRS, r-l, sgg, betaTub60D, Ubi-p63E, Yp1, Yp3, Mlc-c, tws, Yp2, RpA-70, Nc73EF, pnut, 14-3-3epsilon, Ran, Rpt6, CLIP-190, Thiolase, LysRS, Rpt4, Rpn11, CCT2, Usp14, ERp60, Tudor-SN, Chd64, fabp, Nup358, pont, Jafrac1, Sdic1, Prosalpha6, TER94, kdn, Fs(2)Ket, pAbp, zip, Zasp52, Hsc70-4, wupA	l(2)gl, CG3630, dnd, Bsg
cluster_3	1	GO:0031090	organelle membrane	CC	297	42	25.89	1.6	0.7	0.00087	0.0081	Chc, Vha55, mt:ATPase6, mt:CoI, mt:CoIII, mt:ND1, mt:ND2, mt:ND3, mt:ND4L, mt:ND5, ND-23, Ppox, Vps25, CG14812, NP15.6, l(1)G0320, VhaM9.7-b, Tim9a, Nup35, COX6B, Rim2, CG7382, COX5B, ND-B22, COX4L, ATPsynCF6L, Sec63, ND-B14.5AL, SdhC, Mpc1, CG11779, UQCR-14L, Cyt-c1L, CG1544, ND-B8, UQCR-11L, CG31229, TER94, SdhA, mt:ND4, AP-2mu, Hsc70-4
cluster_3	1	GO:0006508	proteolysis	BP	269	37	23.45	1.6	0.66	0.0029	0.022	Dip-B, Rpn8, sgg, Cp1, Rpn10, Acer, Rpt6, TppII, Vps25, CG2658, CG14812, Rad23, CSN3, CG9631, Rpt4, Rpt3, Rpt1, Rpn7, Rpn5, Rpn2, Rpn12, Rpn11, CG1440, Usp2, Usp14, Cul2, Rpn13, Ufd1-like, CG9588, HtrA2, Fsn, Prosalpha2, IKKepsilon, Prosbeta7, Prosalpha6, TER94, Rpn3
cluster_3	1	GO:0006082	organic acid metabolic process	BP	227	31	19.79	1.6	0.65	0.007	0.046	Ddc, Eno, Gapdh2, Gdh, Got2, Ldh, AspRS, Pgi, slgA, Dhfr, GluProRS, Acon, Nc73EF, AcCoAS, Thiolase, LysRS, AlaRS, Menl-1, CG9914, CG9319, Trh, CG8745, CG9674, CRAT, SdhC, Mpc1, CG12428, CG1544, Tpi, SdhA, kdn
cluster_3	1	GO:0044281	small molecule metabolic process	BP	534	66	46.55	1.4	0.5	0.0014	0.012	Ddc, Eno, Gapdh2, Gdh, Got2, Hsc70-3, Ldh, AspRS, Pgi, r-l, slgA, Zw, Dhfr, GlyP, Vha55, GluProRS, Acon, Nc73EF, PhKgamma, AcCoAS, mt:ATPase6, mt:CoI, mt:ND2, mt:ND4L, mt:ND5, ND-23, Uba1, Thiolase, LysRS, AlaRS, AdSS, Dak1, Menl-1, CG2453, CG9914, CG17224, COX5B, ND-B22, fbp, CG9319, COX4L, Hsl, Trh, Fdx2, ATPsynCF6L, CG11811, CG8745, CG17029, CG9674, ND-B14.5AL, CRAT, SdhC, Mpc1, CG12428, UQCR-…
cluster_9	1	GO:0001047	core promoter binding	MF	9	9	4.32	2.1	1.1	0.0013	0.042	Pc, ph-d, ph-p, Psc, upSET, M1BP, Chd1, Trf2, nsl1
cluster_9	2	GO:0000725	recombinational repair	BP	10	10	4.8	2.1	1.1	0.00064	0.023	mei-W68, mus205, Su(var)2-10, mei-41, CG14803, Nup107, CG4078, nbs, Nup160, koi
cluster_9	2	GO:0005871	kinesin complex	CC	11	11	5.28	2.1	1.1	0.00031	0.012	Khc, Klp67A, Klp64D, Klc, Klp3A, Khc-73, Klp10A, Klp31E, cmet, cana, unc-104	sw
cluster_9	1	GO:0006302	double-strand break repair	BP	16	16	7.68	2.1	1.1	7.7e-06	0.00056	mei-W68, mus205, Su(var)2-10, mei-41, Ddx1, CG14803, RecQ5, Nup107, CG4078, mio, Tctp, CycG, RecQ4, nbs, Nup160, koi
cluster_9	1	GO:0005657	replication fork	CC	17	16	8.16	2	0.97	7.2e-05	0.0033	dup, rec, Gnf1, DNApol-alpha50, CG14803, CG12018, RfC38, CG8142, RfC3, RPA2, DNApol-epsilon58, DNApol-alpha180, DNApol-alpha60, RfC4, DNApol-delta, RPA3
cluster_9	3	GO:0000976	transcription regulatory region sequence-specific DNA binding	MF	22	20	10.56	1.9	0.92	2.8e-05	0.0015	crc, Hr3, eyg, ftz-f1, hb, ttk, tup, usp, ct, CrebA, Mad, Hr78, toy, Xbp1, CTCF, Nf-YA, M1BP, nub, Chd1, fd3F	bab1, cav, mTTF, egg
cluster_9	1	GO:0010212	response to ionizing radiation	BP	16	14	7.68	1.8	0.87	0.0012	0.04	Pc, Dsor1, fbl, Stat92E, Drice, RecQ5, Pvf1, Mnn1, Wwox, skl, Tctp, Chrac-14, hpo, Dark
cluster_9	1	GO:0006281	DNA repair	BP	58	50	27.84	1.8	0.84	1.1e-09	3.2e-07	mei-W68, mus205, mus304, phr, Su(var)2-10, mei-41, Ubc6, Rrp1, Xpc, Gnf1, PCNA, CkIalpha, Ddx1, phr6-4, CG14803, flfl, Bap55, Rad9, Rad17, Fen1, Hus1-like, Rad1, RecQ5, Nup107, CG4078, Tfb4, mio, Mnn1, RPA2, FANCI, mms4, Tfb1, Ssl1, Mms19, CG9601, Tctp, CG10898, DNAlig3, CycG, RecQ4, Spf45, pic, RfC4, nbs, Xpd, DNAlig1, Nup160, Caf1-55, koi, RPA3
cluster_9	2	GO:0001067	regulatory region nucleic acid binding	MF	41	33	19.68	1.7	0.75	1.8e-05	0.0011	crc, Hr3, exd, eyg, ftz-f1, hb, Pc, srp, ttk, tup, usp, ct, CrebA, ph-d, ph-p, msl-1, Psc, Mad, E2f1, Hr78, toy, Xbp1, CSN4, Usf, CTCF, Nf-YA, upSET, M1BP, nub, Chd1, Trf2, nsl1, fd3F
cluster_9	1	GO:0000981	RNA polymerase II transcription factor activity, sequence-specific DNA binding	MF	50	40	24	1.7	0.74	3e-06	0.00027	Hr3, Eip75B, exd, e(y)1, ftz-f1, hb, kay, Kr, Met, ovo, shn, srp, Sry-delta, ss, tll, tsh, ttk, tup, usp, vg, bowl, Taf5, Taf6, Taf11, Mad, E2f1, Taf2, Rel, mirr, Hr78, Stat92E, toy, Taf7, Taf10b, NC2beta, Hr83, foxo, nub, Trf2, Hr4
cluster_9	1	GO:0032993	protein-DNA complex	CC	27	21	12.96	1.6	0.7	0.0015	0.046	rec, TfIIB, DNApol-alpha50, His3.3A, Mcm2, Mcm7, flfl, CDC45L, cav, CG12018, RPA2, Mcm10, DNApol-epsilon58, Cdc6, Sld5, His2A:CG33853, His1:CG33855, DNApol-alpha180, DNApol-alpha60, DNApol-delta, RPA3
cluster_9	1	GO:0006310	DNA recombination	BP	30	23	14.4	1.6	0.68	0.0013	0.04	mei-218, mei-W68, mus205, mus304, rec, Su(var)2-10, mei-41, Xpc, Klp3A, CG14803, RecQ5, Nup107, CG4078, RPA2, Exd2, DNAlig3, RecQ4, nbs, DNAlig1, Nup160, Sxl, koi, RPA3
cluster_9	1	GO:0005667	transcription factor complex	CC	44	33	21.12	1.6	0.64	0.00023	0.0093	exd, e(y)1, eyg, kay, usp, Taf5, Taf6, TfIIA-L, Taf11, Iswi, Mad, Med, E2f1, Taf2, TfIIA-S, alien, TfIIEalpha, TfIIEbeta, CycH, Taf7, Smox, Taf10b, Tfb4, Mondo, udd, wash, Tfb1, TAF1C-like, Nf-YA, Ssl1, Trf2, Xpd, Caf1-55
cluster_9	1	GO:0043565	sequence-specific DNA binding	MF	77	58	36.96	1.6	0.65	7.6e-07	0.0001	crc, Hr3, bsh, Eip75B, exd, eyg, ftz-f1, hb, kay, Kr, crp, ovo, srp, su(Hw), tll, ttk, tup, usp, ct, CrebA, bab1, Mad, Med, E2f1, Taf2, Trl, Deaf1, Rel, mirr, Hr78, TfIIEalpha, mael, toy, Rx, Xbp1, Mnt, cav, MTA1-like, fd19B, CG7786, CG9876, CTCF, Nf-YA, Hr83, M1BP, Ibf2, foxo, Trax, dmrt93B, HHEX, REPTOR, nub, Chd1, cic, Myc, Hr4, fd3F, CrebB
cluster_9	2	GO:0004842	ubiquitin-protein transferase activity	MF	80	62	38.4	1.6	0.69	4.9e-08	1e-05	fzy, sina, Ubc6, gol, eff, CG46338, Diap2, ari-1, Ubc84D, Cbl, bon, CG2924, ari-2, Roc1a, SkpB, STUB1, CG10254, CG9014, CG3473, Smurf, CG16781, UbcE2H, CG9941, hiw, CG8184, Ubr1, CG5440, LUBEL, Ufd4, CG13085, CG13344, CG10862, CG14983, CG5087, pall, CG12362, CG7656, CG8786, godzilla, CG11982, CG4813, CG2010, park, Roc2, CG7148, Cnot4, Vps11, CG32581, CG32850, CG33144, Ube3a, ctrip, dnr1, Prp19, C…
cluster_9	1	GO:0003700	DNA binding transcription factor activity	MF	115	90	55.21	1.6	0.71	1.5e-11	5.6e-09	crc, Hr3, bsh, Eip75B, exd, e(y)1, eyg, ftz-f1, hb, her, kay, Kr, Met, ovo, shn, srp, Sry-delta, ss, tll, tsh, ttk, tup, usp, vg, ct, CrebA, bab1, bowl, ewg, Taf5, Taf6, Taf11, Mad, Med, E2f1, Taf2, Trl, Deaf1, Rel, mirr, Hr78, Stat92E, toy, gcm2, Rx, Xbp1, Mnt, cato, Taf7, az2, CG4882, Smox, Taf10b, CG3909, CG7927, MTA1-like, NC2beta, Usf, CG3815, fd19B, CG11835, Oli, Mondo, d4, CG13148, CG7786,…
cluster_9	1	GO:0006259	DNA metabolic process	BP	140	106	67.21	1.6	0.66	9.7e-12	5.5e-09	chif, crm, DNaseII, dup, mei-218, mei-W68, ms(3)K81, mus205, mus304, ovo, phr, pn, rec, Su(var)2-10, mei-41, Ubc6, Rrp1, Xpc, Gnf1, Orc3, PCNA, Klp3A, Nos, RnrL, RnrS, DNApol-alpha50, E2f1, Mcm2, CkIalpha, Ddx1, Orc2, Orc5, cutlet, phr6-4, Mcm7, Orc1, Orc6, Orc4, CG14803, flfl, Drep1, Bap55, Rad9, Rad17, Fen1, CDC45L, cav, Hus1-like, Rad1, RecQ5, wde, Nup107, CG12018, Cdc7, RfC38, CG4078, CG8142,…
cluster_9	1	GO:0004888	transmembrane signaling receptor activity	MF	55	39	26.4	1.5	0.56	0.00045	0.016	nAChRalpha1, nAChRalpha2, Lar, ninaE, sev, smo, Egfr, trp, 5-HT1A, Rdl, Ptp4E, Ptp99A, Ptp10D, Sdc, RyR, Ret, Nmda1, mGluR, Nrk, AkhR, moody, CG4313, PlexA, Tehao, CG2061, Toll-4, Or42a, AstC-R2, AstC-R1, Or85a, PK2-R1, TyrR, Or98b, Nmdar2, 5-HT2A, Tl, 5-HT1B, GluRIB, CG43795
cluster_9	1	GO:0038023	signaling receptor activity	MF	69	49	33.12	1.5	0.56	8e-05	0.0035	nAChRalpha1, nAChRalpha2, Hr3, Lar, Eip75B, ftz-f1, Met, ninaE, sev, smo, tll, Egfr, trp, usp, 5-HT1A, Rdl, Ptp4E, Ptp99A, Ptp10D, Sdc, RyR, Ret, Nmda1, Hr78, mGluR, Nrk, AkhR, moody, CG4313, PlexA, Tehao, CG2061, Toll-4, Or42a, AstC-R2, AstC-R1, Hr83, Or85a, PK2-R1, TyrR, Or98b, CG31183, Nmdar2, 5-HT2A, Tl, 5-HT1B, GluRIB, CG43795, Hr4
cluster_9	1	GO:0044454	nuclear chromosome part	CC	64	47	30.72	1.5	0.61	2.8e-05	0.0015	E(Pc), Pc, Psc, Orc3, Iswi, DNApol-alpha50, Mtor, Rel, prod, Orc2, Orc5, BEAF-32, Orc1, bon, Orc6, Orc4, CG14803, Bin1, Bap55, Rad9, tna, cav, Nipped-B, Hus1-like, Rad1, CG12018, CG3815, CG12081, tomb, CG10336, RPA2, DNApol-epsilon58, HP4, Jarid2, CG7379, Smyd5, Sld5, Rif1, His2A:CG33853, His1:CG33855, htk, DNApol-alpha180, DNApol-alpha60, Sap130, DNApol-delta, Caf1-55, RPA3
cluster_9	1	GO:0006260	DNA replication	BP	62	46	29.76	1.5	0.63	2.2e-05	0.0013	chif, crm, dup, mus205, pn, rec, Gnf1, Orc3, PCNA, Nos, RnrL, RnrS, DNApol-alpha50, E2f1, Mcm2, Orc2, Orc5, cutlet, Mcm7, Orc1, Orc6, Orc4, CG14803, CDC45L, CG12018, Cdc7, RfC38, CG4078, CG8142, RfC3, CG6443, CG10336, PCNA2, RPA2, Mcm10, DNApol-epsilon58, Cdc6, ssp, RecQ4, Rif1, DNApol-alpha180, DNApol-alpha60, RfC4, Myc, DNApol-delta, RPA3
cluster_9	1	GO:0003682	chromatin binding	MF	73	53	35.04	1.5	0.6	1.5e-05	0.00097	crm, Kr, Rcc1, mle, Pc, su(Hw), Su(var)3-7, ttk, ph-d, ph-p, msl-1, Ssrp, Iswi, Arp6, Trl, Mtor, Su(Tpl), prod, Mcm2, Ddx1, Orc2, BEAF-32, Mcm7, Orc1, bon, Chd3, DIP1, Smox, CDC45L, Nipped-B, ADD1, MTA1-like, spt4, CG12081, HP6, Mcm10, row, CTCF, Ibf2, HP1e, foxo, HP1c, wge, His1:CG33855, e(y)3, Chd1, Trf2, Asx, Mi-2, nclb, ebi, Caf1-55, Smr
cluster_9	1	GO:0045944	positive regulation of transcription by RNA polymerase II	BP	75	55	36	1.5	0.61	6.1e-06	0.00047	arm, crc, Hr3, exd, e(y)1, ftz-f1, hb, her, kay, Met, mle, ovo, shn, Sry-delta, tll, ttk, tup, vg, CrebA, bowl, Taf5, Taf6, TfIIA-L, Iswi, Mad, E2f1, Taf2, Trl, TfIIA-S, Mtor, Rel, TfIIEalpha, TfIIEbeta, toy, Drice, Xbp1, Nipped-B, spt4, NC2beta, Myd88, CG9899, yki, Ctr9, Asciz, MED19, S1P, foxo, ATbp, Dlip3, pygo, Trf2, Tl, Tet, Rcd5, CrebB
cluster_9	2	GO:0016567	protein ubiquitination	BP	94	67	45.13	1.5	0.57	3.2e-06	0.00027	fu, fzy, sina, RpL40, gol, eff, CG46338, Diap2, Cul1, ari-1, Ubc84D, Cbl, bon, CG2924, ari-2, Roc1a, SkpB, STUB1, CG10254, CG9014, CG3473, trbl, Smurf, CG16781, UbcE2H, CG9941, hiw, CG8184, Ubr1, CG5440, LUBEL, Ufd4, Cul4, CG11777, CG13344, CG10862, CG14983, CG5087, pall, CG12362, CG7656, CG8786, godzilla, CG11982, Keap1, CG4813, park, Roc2, Cnot4, Vps11, CG32581, CG32850, CG33144, Ube3a, ctrip, …	Aos1, Uba4, SCCRO
cluster_9	4	GO:1902680	positive regulation of RNA biosynthetic process	BP	117	83	56.17	1.5	0.56	2.9e-07	4.7e-05	arm, crc, Hr3, exd, e(y)1, ftz-f1, hb, her, kay, Met, mle, ovo, shn, srp, Sry-delta, su(Hw), tll, ttk, tup, usp, vg, CrebA, bowl, msl-1, Taf5, Taf6, TfIIA-L, Iswi, Mad, Snr1, E2f1, Taf2, Trl, TfIIA-S, Mtor, Chi, Deaf1, Rel, mirr, TfIIEalpha, TfIIEbeta, toy, Drice, lig, Xbp1, trr, Bap55, tna, Nipped-B, spt4, NC2beta, Bap111, tomb, udd, Myd88, sug, TAF1C-like, CG9899, yki, Ctr9, Asciz, Nf-YA, ssp, …	aub, Tis11, smg, RtcB
cluster_9	1	GO:0045935	positive regulation of nucleobase-containing compound metabolic process	BP	138	98	66.25	1.5	0.56	2.2e-08	5.3e-06	arm, aub, chif, crc, Hr3, exd, e(y)1, ftz-f1, hb, her, kay, Met, mle, ovo, pn, shn, srp, Sry-delta, su(Hw), tll, ttk, tup, usp, vg, CrebA, bowl, msl-1, Taf5, Taf6, TfIIA-L, Iswi, Mad, Snr1, E2f1, Taf2, Tis11, Trl, TfIIA-S, Mtor, Chi, Deaf1, Rel, mirr, Nf1, TfIIEalpha, TfIIEbeta, smg, toy, Drice, lig, Xbp1, trr, Bap55, PlexA, tna, Nipped-B, wde, Cdc7, spt4, NC2beta, Bap111, tomb, RtcB, udd, Myd88,…
cluster_9	1	GO:0000228	nuclear chromosome	CC	83	54	39.84	1.4	0.44	0.0012	0.039	E(Pc), mle, ms(3)K81, Pc, msl-1, Psc, Orc3, Iswi, Snr1, DNApol-alpha50, Mtor, Rel, prod, Orc2, Orc5, BEAF-32, Orc1, bon, Orc6, Orc4, CG14803, Bin1, Bap55, Rad9, tna, cav, Nipped-B, Hus1-like, Rad1, CG12018, CG3815, CG12081, tomb, CG10336, RPA2, thoc5, DNApol-epsilon58, HP4, Jarid2, CG7379, Smyd5, Sld5, Dlip3, Rif1, His2A:CG33853, His1:CG33855, htk, DNApol-alpha180, DNApol-alpha60, Mat89Ba, Sap130…
cluster_9	1	GO:0000988	transcription factor activity, protein binding	MF	60	41	28.8	1.4	0.51	0.0011	0.037	arm, crc, exd, ftz-f1, H, per, shn, TfIIS, Gug, TfIIA-L, Mad, Snr1, Taf2, TfIIA-S, alien, Ddx1, CycH, bon, trr, Bin1, Bap55, MED15, Bap111, Sap30, CG6220, Tfb1, MED8, yki, MED19, MED11, MED1, Ssl1, lgs, Dlip3, pygo, rig, Xpd, osa, cic, ebi, Smr
cluster_9	1	GO:0004871	signal transducer activity	MF	123	81	59.05	1.4	0.46	3.9e-05	0.002	nAChRalpha1, nAChRalpha2, arm, csw, cta, Hr3, Lar, Eip75B, ftz-f1, Met, ninaE, Raf, sev, sl, smo, tll, Egfr, trp, usp, 5-HT1A, Rdl, Ptp4E, Ptp99A, Ptp10D, Plc21C, Dsor1, Sdc, msn, RyR, Mad, Med, Ret, Nmda1, Ask1, Hr78, Stat92E, mGluR, Cbl, Nrk, Fak, Mekk1, p38b, RSG7, AkhR, moody, CG4313, PlexA, mbt, Smox, Dronc, Tehao, CG2061, Cdc7, Lnk, slpr, Toll-4, CG5790, Or42a, CG8485, AstC-R2, AstC-R1, Hr8…
cluster_9	1	GO:0060089	molecular transducer activity	MF	103	71	49.45	1.4	0.52	1.1e-05	0.00078	nAChRalpha1, nAChRalpha2, Hr3, Lar, Eip75B, ftz-f1, Met, ninaE, scb, sev, smo, tll, Egfr, trp, usp, nAChRbeta2, 5-HT1A, Rdl, Ptp4E, Ptp99A, Ptp10D, mew, yl, Sdc, RyR, Ret, Nmda1, Sr-CI, Hr78, mGluR, Sr-CII, Nrk, teq, GluClalpha, AkhR, moody, CG4313, santa-maria, PlexA, Tehao, CG2061, nAChRalpha5, bark, Toll-4, nAChRalpha6, Or42a, Swim, ItgaPS5, Ir60a, AstC-R2, AstC-R1, Hr83, Or85a, PK2-R1, TyrR, …
cluster_9	2	GO:0009891	positive regulation of biosynthetic process	BP	159	106	76.33	1.4	0.47	1e-06	0.00012	arm, aub, chif, crc, Hr3, exd, e(y)1, ftz-f1, hb, her, kay, Met, mle, ovo, pn, shn, srp, Sry-delta, stau, su(Hw), tll, ttk, tup, usp, vg, CrebA, orb, bowl, msl-1, Taf5, Taf6, TfIIA-L, Iswi, Mad, Snr1, E2f1, Taf2, Trl, TfIIA-S, Mtor, Chi, Deaf1, imd, Rel, mirr, Diap2, Nf1, TfIIEalpha, TfIIEbeta, toy, Drice, lig, Dredd, Xbp1, trr, Bap55, PlexA, tyf, tna, Nipped-B, Tehao, Cdc7, spt4, NC2beta, MCTS1,…
cluster_9	1	GO:0010557	positive regulation of macromolecule biosynthetic process	BP	141	96	67.69	1.4	0.5	7.7e-07	0.0001	arm, aub, chif, crc, Hr3, exd, e(y)1, ftz-f1, hb, her, kay, Met, mle, ovo, pn, shn, srp, Sry-delta, stau, su(Hw), tll, ttk, tup, usp, vg, CrebA, orb, bowl, msl-1, Taf5, Taf6, TfIIA-L, Iswi, Mad, Snr1, E2f1, Taf2, Trl, TfIIA-S, Mtor, Chi, Deaf1, Rel, mirr, TfIIEalpha, TfIIEbeta, toy, Drice, lig, Xbp1, trr, Bap55, tyf, tna, Nipped-B, Cdc7, spt4, NC2beta, MCTS1, Bap111, DENR, mxt, tomb, udd, Myd88, …
cluster_9	1	GO:0051173	positive regulation of nitrogen compound metabolic process	BP	164	111	78.73	1.4	0.5	1.7e-07	3.1e-05	arm, aub, chif, crc, Hr3, exd, e(y)1, ftz-f1, hb, her, kay, Met, mle, ovo, pn, shn, srp, Sry-delta, stau, su(Hw), tll, ttk, tup, usp, vg, CrebA, orb, bowl, msl-1, Taf5, Taf6, TfIIA-L, Iswi, Mad, Snr1, E2f1, Taf2, Tis11, Trl, TfIIA-S, Mtor, Chi, Deaf1, imd, Rel, mirr, Diap2, Nf1, TfIIEalpha, TfIIEbeta, smg, toy, Drice, lig, Dredd, Xbp1, trr, Bap55, PlexA, tyf, tna, Nipped-B, Tehao, wde, Cdc7, spt4…
cluster_9	3	GO:2001141	regulation of RNA biosynthetic process	BP	332	218	159.38	1.4	0.45	1.1e-11	5.5e-09	arm, aub, crc, crm, csw, Hr3, bsh, Eip75B, E(Pc), exd, e(y)1, eyg, fog, ftz-f1, fu, hb, her, kay, Kr, Met, mle, ovo, Pc, per, Raf, sev, shn, srp, Sry-delta, ss, su(Hw), su(sable), Su(var)3-7, tll, tsh, ttk, tup, usp, vg, ct, RasGAP1, CrebA, ph-d, ph-p, bab1, bowl, TfIIB, Su(fu), ewg, msl-1, Psc, wdn, Taf5, Taf6, TfIIS, Gug, TfIIA-L, Taf11, e(r), Iswi, Mad, Med, Snr1, twin, E2f1, Taf2, Trl, TfIIA-…
cluster_9	1	GO:0003677	DNA binding	MF	251	174	120.49	1.4	0.53	1.6e-12	2.3e-09	crc, Hr3, bsh, Eip75B, exd, eyg, fs(1)K10, dup, ftz-f1, hb, her, kay, Kr, crp, mei-W68, mus205, ovo, Pc, rec, RpI135, srp, Sry-beta, Sry-delta, ss, su(Hw), Su(var)3-7, Su(var)2-10, tll, ttk, tup, usp, ct, CrebA, Rrp1, Xpc, ph-d, ph-p, bab1, Gnf1, ewg, msl-1, Psc, wdn, Orc3, PCNA, Ssrp, TfIIS, Gug, Iswi, Mad, Med, E2f1, Taf2, Tis11, Trl, Mtor, Deaf1, Rel, mirr, His3.3A, Mcm2, Hr78, Orc2, Orc5, cut…
cluster_9	1	GO:0070647	protein modification by small protein conjugation or removal	BP	134	83	64.33	1.3	0.37	0.00068	0.024	fu, fzy, sina, RpL40, gol, eff, CG46338, Uch-L5, alien, Diap2, Cul1, ari-1, Ubc84D, Cbl, bon, CG2924, ari-2, Roc1a, SkpB, STUB1, CSN4, CG10254, CSN7, CG9014, CG3473, trbl, Smurf, Aos1, CG16781, UbcE2H, Uch-L5R, CG9941, hiw, CG8184, Ubr1, CG5440, LUBEL, Uba4, Ufd4, Cul4, CG11777, CG13344, Usp20-33, CG10862, CG14983, CG5087, pall, CG12362, SCCRO, CG7656, Sgf11, CG8786, godzilla, CG11982, Keap1, Usp…
cluster_9	1	GO:0051726	regulation of cell cycle	BP	187	113	89.77	1.3	0.33	0.00033	0.012	Ald, bru1, Dl, fzy, kay, sti, Rcc1, mus101, mus304, Raf, rod, smo, Su(var)2-10, tll, Egfr, vg, Cdk2, mei-41, me31B, Zw10, gig, Klc, Dsor1, mtrm, fbl, bol, Klp3A, Mad, E2f1, alien, Mtor, Cul1, Lis-1, Rga, crol, Mcm7, CycH, Mnt, CG2865, Bub3, Smox, dgt4, CDC45L, Tsc1, Sep5, Hus1-like, CSN4, RecQ5, wdb, CG6191, gammaSnap1, CSN7, trbl, Aos1, Rab3-GEF, Alr, mio, Mnn1, cdc14, CycY, CG10336, Mcm10, Nup4…
cluster_9	1	GO:0008270	zinc ion binding	MF	222	134	106.57	1.3	0.33	9.8e-05	0.0042	chif, Hr3, dor, Eip75B, ftz-f1, lt, Ppn, shn, sina, sol, srp, Su(var)2-10, tll, tup, usp, ph-d, ph-p, tok, TfIIB, gol, Psc, TfIIS, lark, Taf2, Deaf1, Hr78, Diap2, abs, Clp, ari-1, RpI1, Cbl, stck, Zfrp8, bon, Chd3, az2, ari-2, Roc1a, tna, hang, CAH1, MTA1-like, spt4, CG9014, Patsas, CHORD, CG16781, CG3815, CG3918, CG9941, hiw, CG8117, CG12379, Ubr1, CG6769, CG12200, Phf7, CG17260, CG17221, LUBEL,…
cluster_9	1	GO:0044427	chromosomal part	CC	180	112	86.41	1.3	0.37	6.3e-05	0.0029	E(Pc), dup, fzy, mle, ms(3)K81, ord, Pc, polo, rec, rod, Sry-beta, Sry-delta, su(Hw), su(sable), Su(var)3-7, Su(var)2-10, Klp67A, Zw10, ph-d, Gnf1, msl-1, Psc, Orc3, Gug, Iswi, Arp6, DNApol-alpha50, Trl, Mtor, Rel, prod, His3.3A, Orc2, Orc5, BEAF-32, Lis-1, Cdk9, Orc1, Df31, bon, Orc6, Orc4, Chd3, CG14803, Bin1, flfl, DIP1, Bub3, Bap55, Rad9, Tip60, tna, cav, Nipped-B, Hus1-like, ADD1, Rad1, CG12…
cluster_9	5	GO:0010558	negative regulation of macromolecule biosynthetic process	BP	163	103	78.25	1.3	0.4	5e-05	0.0024	bru1, aub, BicC, cup, Hr3, Eip75B, eyg, fs(1)K10, hb, Kr, ovo, Pc, per, shn, ss, su(Hw), su(sable), Su(var)3-7, tra, tsh, ttk, usp, ct, me31B, bgcn, ph-d, ph-p, bowl, msl-1, Psc, Sdc, Gug, Iswi, msi, Nos, twin, E2f1, Tis11, Trl, alien, mirr, Orc2, Orc5, mael, smg, Rga, crol, Orc1, Orc6, Mnt, Sirt1, Bin1, Bap55, Adar, ADD1, wde, CG7927, spt4, NC2beta, seq, Rcd-1, Elba3, CG10336, Mcm10, Not3, Ars2,…	Cbl, nub, dnr1, TBPH, LS2, BI-1
cluster_9	1	GO:0006357	regulation of transcription by RNA polymerase II	BP	179	112	85.93	1.3	0.38	4.4e-05	0.0022	arm, crc, csw, Hr3, Eip75B, E(Pc), exd, e(y)1, eyg, fog, ftz-f1, fu, hb, her, kay, Kr, Met, mle, ovo, per, Raf, sev, shn, Sry-delta, ss, tll, tsh, ttk, tup, vg, ct, RasGAP1, CrebA, bowl, TfIIB, ewg, Taf5, Taf6, TfIIS, TfIIA-L, e(r), Iswi, Mad, Med, Snr1, twin, E2f1, Taf2, Trl, TfIIA-S, Mtor, Deaf1, Rel, mirr, ksr, BEAF-32, Lis-1, TfIIEalpha, TfIIEbeta, toy, Drice, crol, Rx, cnk, Xbp1, Mnt, Bin1, …
cluster_9	1	GO:0010628	positive regulation of gene expression	BP	147	95	70.57	1.3	0.43	2.7e-05	0.0015	arm, aub, crc, Hr3, exd, e(y)1, ftz-f1, g, hb, her, kay, Met, mle, ovo, shn, srp, Sry-delta, stau, su(Hw), tll, ttk, tup, usp, vg, CrebA, orb, bowl, msl-1, Taf5, Taf6, TfIIA-L, Iswi, Mad, Snr1, E2f1, Taf2, Trl, TfIIA-S, Mtor, Chi, Deaf1, Rel, mirr, TfIIEalpha, TfIIEbeta, toy, Drice, lig, Xbp1, trr, Bap55, tyf, tna, Nipped-B, spt4, NC2beta, MCTS1, Bap111, DENR, mxt, tomb, RtcB, udd, Myd88, sug, HP…
cluster_9	1	GO:0010604	positive regulation of macromolecule metabolic process	BP	261	160	125.29	1.3	0.35	5.8e-06	0.00047	arm, aub, chif, crc, Hr3, exd, e(y)1, ftz-f1, fu, fzy, g, hb, her, kay, Met, mle, ovo, Raf, pn, shn, srp, Sry-delta, stau, su(Hw), tll, ttk, tup, usp, vg, CrebA, orb, bowl, gig, msl-1, Dsor1, Taf5, Taf6, msn, TfIIA-L, Iswi, Mad, RnrL, RnrS, Snr1, E2f1, Taf2, Tis11, Trl, TfIIA-S, Mtor, Chi, Deaf1, Ask1, Rel, mirr, betaggt-I, CkIalpha, ksr, TfIIEalpha, TfIIEbeta, smg, toy, Drice, lig, cnk, Xbp1, tr…
cluster_9	1	GO:0009893	positive regulation of metabolic process	BP	283	173	135.86	1.3	0.35	3e-06	0.00027	arm, aub, chif, crc, Hr3, exd, e(y)1, ftz-f1, fu, fzy, g, hb, her, kay, Met, mle, ovo, Raf, pn, shn, srp, Sry-delta, stau, su(f), su(Hw), tll, ttk, tup, usp, vg, CrebA, orb, bowl, gig, msl-1, Dsor1, Taf5, Taf6, msn, TfIIA-L, Iswi, Mad, RnrL, RnrS, Snr1, E2f1, Taf2, Tis11, Trl, TfIIA-S, Mtor, Chi, Deaf1, imd, Ask1, Rel, mirr, betaggt-I, CkIalpha, Diap2, Nf1, ksr, TfIIEalpha, TfIIEbeta, smg, toy, D…
cluster_9	1	GO:0031325	positive regulation of cellular metabolic process	BP	265	164	127.22	1.3	0.37	1.9e-06	0.0002	arm, aub, chif, crc, Hr3, exd, e(y)1, ftz-f1, fu, fzy, hb, her, kay, Met, mle, ovo, Raf, pn, shn, srp, Sry-delta, stau, su(Hw), tll, ttk, tup, usp, vg, CrebA, orb, bowl, gig, msl-1, Dsor1, Taf5, Taf6, msn, TfIIA-L, Iswi, Mad, RnrL, RnrS, Snr1, E2f1, Taf2, Tis11, Trl, TfIIA-S, Mtor, Chi, Deaf1, imd, Ask1, Rel, mirr, betaggt-I, CkIalpha, Diap2, Nf1, ksr, TfIIEalpha, TfIIEbeta, smg, toy, Drice, lig,…
cluster_9	1	GO:0046914	transition metal ion binding	MF	307	187	147.38	1.3	0.34	1.6e-06	0.00018	chif, Hr3, dor, Eip75B, ftz-f1, lt, mal, Ppn, ry, shn, sina, sol, srp, Su(var)2-10, tll, tup, usp, ph-d, ph-p, tok, TfIIB, gol, phm, Psc, Cyp4d1, TfIIS, Cyp4d2, lark, Nos, Taf2, Cyp6a9, Cyp6a22, Deaf1, Cyp4e3, Cyp9b1, Cyp9c1, Fer1HCH, Hr78, Diap2, abs, Clp, Cyp6a17, ari-1, RpI1, Cbl, stck, Zfrp8, bon, Chd3, Irp-1A, az2, ari-2, Roc1a, tna, hang, CAH1, MTA1-like, spt4, CG9014, Cyp28a5, Patsas, CHOR…
cluster_9	1	GO:0005694	chromosome	CC	230	136	110.41	1.2	0.3	0.00033	0.012	E(Pc), dup, fzy, Rcc1, mei-W68, mle, ms(3)K81, ord, Pc, pip, polo, rec, rod, Sry-beta, Sry-delta, su(Hw), su(sable), Su(var)3-7, Su(var)2-10, ttk, usp, Klp67A, CrebA, Zw10, ph-d, Gnf1, msl-1, Psc, Orc3, Dsor1, Gug, Iswi, Snr1, Arp6, DNApol-alpha50, Trl, Mtor, Deaf1, Rel, Su(Tpl), prod, His3.3A, Orc2, Orc5, BEAF-32, Lis-1, Cdk9, Orc1, Df31, bon, Orc6, Orc4, Chd3, CG14803, trr, Bin1, flfl, DIP1, Bu…
cluster_9	1	GO:0006366	transcription by RNA polymerase II	BP	208	125	99.85	1.2	0.32	0.00022	0.0092	arm, crc, csw, Hr3, Eip75B, E(Pc), exd, e(y)1, eyg, fog, ftz-f1, fu, hb, her, kay, Kr, lds, Met, mle, ovo, per, Raf, sev, shn, Sry-delta, ss, tll, tsh, ttk, tup, vg, ct, RasGAP1, CrebA, bowl, TfIIB, ewg, Taf5, Taf6, TfIIS, TfIIA-L, Taf11, e(r), Iswi, Mad, Med, Snr1, twin, E2f1, Taf2, Trl, TfIIA-S, Mtor, Deaf1, Rel, Su(Tpl), mirr, ksr, BEAF-32, Lis-1, TfIIEalpha, TfIIEbeta, toy, Cdk9, crol, Rx, cn…
