# Supplementary material for: Tissue-specific modulation of gene expression in response to lowered insulin signalling in Drosophila
Source: eLife. 2021 Apr 21;10:e67275. doi: 10.7554/eLife.67275 (PMC8060030; doi:10.7554/eLife.67275)
Supplement: Supplementary file 9. — LogFC, p-value, Fisher adj (adjusted P-value), Flybase ID, and Gene symbol (Name) are shown. [file elife-67275-supp9.xlsx]

## Sheet: Fat
logFC	P.Value	adj.P.Val	symbol	flybase
0.308556	5.25217e-05	0.000570992	14-3-3epsilon	FBgn0020238
0.479116	0.000277913	0.00220086	14-3-3epsilon	FBgn0020238
-0.307532	0.0581346	0.136804	14-3-3epsilon	FBgn0020238
-0.300222	0.116883	0.228059	14-3-3epsilon	FBgn0020238
-0.322746	0.0550429	0.131397	Act87E	FBgn0000046
0.307908	5.38391e-05	0.000580924	Ald	FBgn0000064
0.16027	0.507236	0.648661	Ald	FBgn0000064
0.280682	0.00783599	0.030009	alien	FBgn0013746
0.773218	0.189229	0.323915	Arp8	FBgn0030877
0.837684	0.133108	0.251091	aub	FBgn0000146
0.190244	0.0981949	0.199761	Bap55	FBgn0025716
-0.22751	0.325743	0.479995	Bap60	FBgn0025463
0.65842	0.163547	0.292164	BigH1	FBgn0038252
0.629118	0.0300235	0.0828572	brm	FBgn0000212
0.358094	0.00270374	0.013367	Caf1-55	FBgn0263979
2.98386	0.072015	0.16005	Cdk1	FBgn0004106
-0.60739	0.167938	0.297301	CG10898	FBgn0037911
-2.49929	1.57028e-05	0.000232101	CG42374	FBgn0259720
0.176106	0.367455	0.519644	CG5181	FBgn0031909
-1.05367	0.0813609	0.174356	CG5316	FBgn0038704
1.28136	0.0171108	0.0546701	Chrac-14	FBgn0043002
0.16438	0.155982	0.28346	CkIalpha	FBgn0015024
0.136754	0.618335	0.740487	CSN1b	FBgn0027057
0.090802	0.422658	0.571743	CSN3	FBgn0027055
0.177478	0.20597	0.345364	CSN4	FBgn0027054
0.245882	0.230849	0.373303	CSN5	FBgn0027053
0.050158	0.711827	0.806364	CSN6	FBgn0028837
0.058342	0.708568	0.804221	CSN7	FBgn0028836
1.06113	0.0362376	0.0950956	CSN8	FBgn0261437
-0.41682	0.363204	0.515655	Ctf4	FBgn0033890
-0.152354	0.229208	0.371344	Cul1	FBgn0015509
0.04953	0.733069	0.820806	Cul4	FBgn0033260
0.062718	0.694269	0.793555	Ddx1	FBgn0015075
2.1362	2.25423e-07	8.46021e-06	Df31	FBgn0022893
1.15496	0.10999	0.217761	DNAlig1	FBgn0262619
-1.01383	0.112192	0.2204	DNApol-delta	FBgn0263600
-0.10459	0.0371673	0.0969855	Dp1	FBgn0027835
3.59156	2.71359e-11	1.37627e-08	dpa	FBgn0015929
0.533664	0.0558057	0.132704	dre4	FBgn0002183
0.050562	0.629319	0.75073	Dref	FBgn0015664
0.341422	0.0917407	0.190362	Dsor1	FBgn0010269
0.120116	0.362061	0.51454	E(bx)	FBgn0000541
0.196622	0.0254915	0.0733474	eIF4A	FBgn0001942
0.143078	0.147171	0.271276	eIF4E1	FBgn0015218
-0.148482	0.0172256	0.0549083	eIF4G1	FBgn0023213
-0.20893	0.156668	0.284396	EndoG	FBgn0033690
-0.01576	0.825356	0.887232	EndoGI	FBgn0028515
0.33224	0.420262	0.569319	enok	FBgn0034975
0.636226	0.374881	0.525944	Fen1	FBgn0025832
0.309608	0.0810495	0.173948	flfl	FBgn0024555
0.335332	0.00369303	0.0171389	Fmr1	FBgn0028734
-0.340354	0.0139252	0.0467348	gfzf	FBgn0250732
0.849702	0.0733954	0.162116	gkt	FBgn0260817
0.98994	0.00175937	0.00955151	Gnf1	FBgn0004913
0.061788	0.708631	0.804221	His1:CG33855	FBgn0053855
-0.119276	0.158126	0.286355	His3	FBgn0001199
-0.039398	0.646471	0.763252	His4	FBgn0001200
0.855066	0.133322	0.251274	HP1b	FBgn0030082
1.01023	0.100284	0.202729	Incenp	FBgn0260991
-0.050962	0.931644	0.953968	Invadolysin	FBgn0086359
0.441608	0.0030094	0.0145775	Iswi	FBgn0011604
0.162528	0.0530791	0.127626	Kap-alpha3	FBgn0027338
-0.618788	0.241624	0.386814	kis	FBgn0266557
-0.478838	0.000160432	0.00141311	koi	FBgn0265003
-0.559892	0.00444904	0.019574	koi	FBgn0265003
-0.089204	0.219002	0.360769	larp	FBgn0261618
1.49134	0.00726648	0.0285629	lds	FBgn0002542
0.160972	0.722819	0.813903	LTV1	FBgn0027525
0.364826	0.000309732	0.00240001	lwr	FBgn0010602
2.30294	0.000262974	0.00209796	M1BP	FBgn0037621
0.162554	0.262539	0.411296	MBD-R2	FBgn0038016
1.7384	7.79962e-05	0.000792075	Mcm2	FBgn0014861
3.37713	3.74617e-07	1.15752e-05	Mcm3	FBgn0024332
3.49001	1.06046e-08	9.34067e-07	Mcm5	FBgn0017577
3.59214	1.1856e-07	5.22148e-06	Mcm6	FBgn0025815
2.06412	0.000221667	0.00183983	Mcm7	FBgn0020633
0.912482	3.21209e-05	0.000397231	me31B	FBgn0004419
0.898594	0.234319	0.377876	MED4	FBgn0035754
0.290094	0.266125	0.415555	Mi-2	FBgn0262519
0.054604	0.878007	0.920234	mio	FBgn0031399
-0.63431	0.094946	0.195002	mle	FBgn0002774
0.217956	0.0575288	0.135828	Mms19	FBgn0037301
0.012558	0.974947	0.982918	mod(mdg4)	FBgn0002781
0.442172	0.0159276	0.0517734	MRG15	FBgn0027378
0.157362	0.0863354	0.182175	Nap1	FBgn0015268
0.620516	8.08057e-08	4.20189e-06	Nlp	FBgn0016685
0.158086	0.229664	0.371943	Not1	FBgn0085436
-0.161788	0.330561	0.484326	Nup107	FBgn0027868
0.884644	0.148356	0.272935	Nup160	FBgn0262647
0.199784	0.00547976	0.0229618	Nurf-38	FBgn0016687
0.586332	0.222301	0.363979	Nurf-38	FBgn0016687
0.080128	0.850988	0.905092	Orc6	FBgn0023180
0.56489	2.11339e-06	4.65376e-05	P32	FBgn0034259
2.24825	0.000143482	0.00130372	PCNA	FBgn0005655
-0.128934	0.141093	0.262822	pic	FBgn0260962
-0.02508	0.956378	0.97023	pita	FBgn0034878
0.083524	0.235956	0.380137	pn	FBgn0003116
0.27186	0.00993668	0.0358585	pont	FBgn0040078
-1.03115	0.116865	0.228059	Pop2	FBgn0036239
0.517914	0.0847882	0.180003	Pp1-87B	FBgn0004103
0.868396	0.137938	0.258171	prod	FBgn0014269
0.153508	0.0546363	0.130788	Rad23	FBgn0026777
0.127832	0.767146	0.846571	Rbf	FBgn0015799
-0.130158	0.156695	0.284396	Rcc1	FBgn0002638
-0.178138	0.680947	0.78495	Rcd5	FBgn0263832
0.482464	0.00789428	0.030152	rept	FBgn0040075
-0.371608	0.161901	0.290767	RfC3	FBgn0032244
1.76819	2.98129e-05	0.000372011	RfC38	FBgn0028700
1.779	0.000459313	0.00327668	RfC4	FBgn0260985
0.14719	0.152531	0.278838	Rga	FBgn0017550
0.2416	0.0679799	0.153613	RpA-70	FBgn0010173
0.902542	1.06535e-05	0.000170845	RPA2	FBgn0032906
0.409602	0.052532	0.126522	RPA3	FBgn0266421
-0.632004	0.17465	0.30623	Rpb4	FBgn0263757
0.419598	0.00523691	0.0221811	Rpb5	FBgn0033571
-0.159374	0.47854	0.622852	Rpb8	FBgn0037121
-1.51971	0.00218743	0.0112392	RpII15	FBgn0004855
-0.298786	0.0645189	0.14804	RpII215	FBgn0003277
-0.063592	0.332961	0.486645	RpLP0	FBgn0000100
-0.156762	0.0058507	0.0240035	RpS3	FBgn0002622
1.14261	4.90861e-05	0.000544616	Rrp1	FBgn0004584
0.511006	0.000847867	0.00528814	Set	FBgn0014879
0.166884	0.0342468	0.0913529	SF2	FBgn0040284
-0.11054	0.522395	0.661064	SkpA	FBgn0025637
0.764354	0.127994	0.243353	Slbp	FBgn0041186
0.504504	0.104951	0.209988	slmb	FBgn0023423
-0.29735	0.000187617	0.00161951	sls	FBgn0086906
-0.096014	0.39325	0.543995	sls	FBgn0086906
-1.68919	0.00963224	0.0350529	SMC1	FBgn0040283
1.71673	0.248492	0.395024	spel1	FBgn0015546
0.099392	0.407418	0.557696	Spt5	FBgn0040273
3.07637	3.53842e-08	2.27938e-06	Su(var)2-10	FBgn0003612
-0.072374	0.51393	0.655087	Su(var)205	FBgn0003607
-0.175266	0.60718	0.731816	Suv3	FBgn0037232
0.0787	0.378789	0.529745	Tctp	FBgn0037874
0.571354	3.90685e-05	0.000460356	TFAM	FBgn0038805
0.02615	0.95416	0.968522	TfIIFbeta	FBgn0010421
-0.435288	0.00540836	0.022751	Top1	FBgn0004924
0.15149	0.158238	0.286355	Top2	FBgn0003732
-0.745276	0.165204	0.293425	Trl	FBgn0013263
0.102408	0.601685	0.727623	Ubc6	FBgn0004436
-0.26508	0.100069	0.202579	wds	FBgn0040066
-0.471564	0.0569506	0.134906	XRCC1	FBgn0026751

## Sheet: Gut
logFC	P.Value	adj.P.Val	symbol	flybase
1.10454	4.22435e-07	1.18607e-05	Rpb5	FBgn0033571
0.53742	1.01075e-06	2.4154e-05	Ald	FBgn0000064
0.955202	7.58946e-06	0.000111924	RPA3	FBgn0266421
0.69609	3.13783e-05	0.000333322	sls	FBgn0086906
0.48309	5.93739e-05	0.000550781	larp	FBgn0261618
-0.646428	0.000146459	0.0010859	me31B	FBgn0004419
0.863228	0.000225926	0.00152358	LTV1	FBgn0027525
0.499226	0.000241511	0.00158876	His1:CG33855	FBgn0053855
-0.69437	0.000272316	0.00175415	Top1	FBgn0004924
0.422352	0.000420741	0.00248009	TFAM	FBgn0038805
-1.97964	0.000485499	0.00276858	RpII18	FBgn0003275
-1.62808	0.000536374	0.00297444	Cul4	FBgn0033260
-0.668514	0.000552345	0.00303352	Df31	FBgn0022893
-1.29341	0.00064535	0.00340722	Cul1	FBgn0015509
-2.98263	0.000710683	0.00365416	Ald	FBgn0000064
1.08139	0.000723781	0.00371203	Nurf-38	FBgn0016687
0.334206	0.000884221	0.00439971	Nlp	FBgn0016685
0.186884	0.00150141	0.00670143	sls	FBgn0086906
-0.269944	0.0017172	0.00740697	Nurf-38	FBgn0016687
-2.41731	0.00214486	0.00879348	dup	FBgn0000996
0.700858	0.00265135	0.0104446	CSN3	FBgn0027055
-0.379604	0.00280838	0.0109242	SkpA	FBgn0025637
-1.10572	0.00364749	0.0135219	CSN1b	FBgn0027057
0.829734	0.00367004	0.0135778	Rga	FBgn0017550
0.634302	0.0038082	0.0139604	koi	FBgn0265003
1.37617	0.00425368	0.0151552	nsl1	FBgn0262527
-2.03977	0.00572782	0.0192168	Rrp1	FBgn0004584
0.290054	0.0063557	0.0208712	SF2	FBgn0040284
-0.494544	0.00962401	0.0293532	dre4	FBgn0002183
-0.288558	0.0103849	0.0310852	Caf1-55	FBgn0263979
0.226812	0.012241	0.0354336	Fmr1	FBgn0028734
0.374502	0.0147309	0.0410143	Su(var)205	FBgn0003607
0.597002	0.0151851	0.0421332	tefu	FBgn0045035
-1.3778	0.0205818	0.0538221	Rpb4	FBgn0263757
-0.765194	0.0214635	0.055499	alien	FBgn0013746
1.16571	0.0269032	0.0663272	Gnf1	FBgn0004913
0.319722	0.034064	0.0795484	CSN8	FBgn0261437
0.690484	0.0352953	0.081713	CG42374	FBgn0259720
-1.11011	0.0435888	0.097116	Rcd1	FBgn0033897
-0.171688	0.0452888	0.0999631	pont	FBgn0040078
-0.196206	0.0477872	0.103939	P32	FBgn0034259
-0.189752	0.0508988	0.109699	Top2	FBgn0003732
1.11299	0.0572164	0.119664	14-3-3epsilon	FBgn0020238
0.510782	0.0684377	0.138041	Bap55	FBgn0025716
0.236346	0.070573	0.140911	Act87E	FBgn0000046
-0.16413	0.0856097	0.164126	EndoGI	FBgn0028515
-0.24296	0.101564	0.187827	CSN4	FBgn0027054
0.232828	0.124983	0.219802	RpA-70	FBgn0010173
0.214212	0.130644	0.227596	Spt5	FBgn0040273
0.120654	0.138119	0.237331	eIF4G1	FBgn0023213
-0.2161	0.141455	0.241006	Dref	FBgn0015664
-0.354006	0.149278	0.251989	mle	FBgn0002774
0.11785	0.149382	0.252059	eIF4A	FBgn0001942
0.215624	0.15404	0.257436	pic	FBgn0260962
0.344296	0.158072	0.263192	gfzf	FBgn0250732
0.244172	0.164324	0.271357	Ubc6	FBgn0004436
-0.592508	0.172013	0.281202	Mms19	FBgn0037301
-0.132914	0.180334	0.291343	His4	FBgn0001200
0.213618	0.186621	0.299456	Su(var)2-10	FBgn0003612
-1.21614	0.197642	0.313394	Dsor1	FBgn0010269
-0.138446	0.197724	0.313401	14-3-3epsilon	FBgn0020238
0.179694	0.20192	0.318422	His3	FBgn0001199
-0.83028	0.204092	0.32059	NC2beta	FBgn0028926
0.072304	0.207258	0.324668	RpS3	FBgn0002622
0.755704	0.211624	0.328957	rad50	FBgn0034728
-0.58761	0.217569	0.335735	14-3-3epsilon	FBgn0020238
0.11893	0.218379	0.33647	Tctp	FBgn0037874
0.241164	0.220664	0.339341	HP1b	FBgn0030082
0.226498	0.229153	0.349458	RpII15	FBgn0004855
0.112262	0.239347	0.361309	Rad23	FBgn0026777
-0.208324	0.244545	0.367424	Pp1-87B	FBgn0004103
-0.242496	0.272401	0.398505	EndoG	FBgn0033690
-0.112186	0.274207	0.40071	eIF4E1	FBgn0015218
0.081326	0.310763	0.438347	Dp1	FBgn0027835
0.127242	0.317933	0.445371	Nap1	FBgn0015268
0.214508	0.323868	0.451604	RPA2	FBgn0032906
0.389656	0.325868	0.45327	Dsp1	FBgn0011764
-0.212086	0.328823	0.456812	CSN5	FBgn0027053
0.169372	0.330117	0.457662	Mi-2	FBgn0262519
0.206032	0.343104	0.471446	M1BP	FBgn0037621
-0.183184	0.343721	0.471811	Iswi	FBgn0011604
-0.32016	0.351504	0.480202	Nup160	FBgn0262647
0.344744	0.356294	0.4851	SMC2	FBgn0027783
-0.928306	0.363789	0.492605	CSN7	FBgn0028836
0.508856	0.371825	0.500657	E(bx)	FBgn0000541
-0.155116	0.387137	0.515926	Nup107	FBgn0027868
0.349116	0.387591	0.516018
-0.07428	0.389786	0.517742	RpLP0	FBgn0000100
-0.373702	0.401938	0.53062	pn	FBgn0003116
-0.251224	0.402978	0.530962	flfl	FBgn0024555
0.196154	0.415807	0.54458	mio	FBgn0031399
-0.577616	0.44274	0.571305	mus205	FBgn0002891
-0.166852	0.493841	0.619571	prod	FBgn0014269
-0.278128	0.499672	0.624746	Rpb8	FBgn0037121
0.206696	0.536197	0.659759	Ddx1	FBgn0015075
0.289146	0.536669	0.660138	TfIIFbeta	FBgn0010421
-0.268142	0.553373	0.673687	dpa	FBgn0015929
-0.233312	0.570806	0.68696	Chd1	FBgn0250786
-0.110886	0.592565	0.704251	SMC1	FBgn0040283
-0.402314	0.597178	0.70817	Trl	FBgn0013263
-0.235204	0.617668	0.726477	mod(mdg4)	FBgn0002781
0.049476	0.632857	0.738089	Kap-alpha3	FBgn0027338
-0.057058	0.633756	0.738654	RpII215	FBgn0003277
-0.098056	0.639474	0.743437	CkIalpha	FBgn0015024
-0.194306	0.661013	0.760354	Not1	FBgn0085436
-0.047036	0.666287	0.764237	rept	FBgn0040075
0.198942	0.712399	0.800703	Rcd5	FBgn0263832
-0.538234	0.74032	0.819727	kis	FBgn0266557
0.137592	0.756632	0.830987	DNAlig4	FBgn0030506
0.139024	0.763114	0.835999	DNAlig3	FBgn0038035
-0.081944	0.772476	0.84457	PCNA	FBgn0005655
0.034628	0.775111	0.846837	Set	FBgn0014879
0.060286	0.788542	0.856861	brm	FBgn0000212
-0.16806	0.824197	0.88227	Nipped-A	FBgn0053554
0.023116	0.826751	0.883828	Rcc1	FBgn0002638
-0.069936	0.832435	0.888461	pita	FBgn0034878
0.103266	0.845635	0.896207	lwr	FBgn0010602
0.118356	0.855071	0.902852	Bap60	FBgn0025463
-0.047684	0.862965	0.908313	CSN6	FBgn0028837
-0.047092	0.903728	0.938976	Chrac-14	FBgn0043002
-0.01734	0.959328	0.976162	Suv3	FBgn0037232
-0.022486	0.968022	0.980168	Mekk1	FBgn0024329
0.001656	0.994275	0.997026	MBD-R2	FBgn0038016

## Sheet: Brain
logFC	P.Value	adj.P.Val	symbol	flybase
0.641688	1.32193e-06	6.91579e-05	Dref	FBgn0015664
0.35474	7.92469e-06	0.000218809	SF2	FBgn0040284
0.294468	2.85931e-05	0.000529637	TFAM	FBgn0038805
0.385738	2.89701e-05	0.000529637	brm	FBgn0000212
0.414694	3.49403e-05	0.000605237	E(bx)	FBgn0000541
0.588102	0.000134642	0.00156094	Kap-alpha3	FBgn0027338
0.574634	0.000210205	0.00217188	prod	FBgn0014269
-2.13174	0.000263153	0.00255818	Rcd5	FBgn0263832
0.29803	0.000273183	0.00261729	His4	FBgn0001200
0.442554	0.000550104	0.00450972	His1:CG33855	FBgn0053855
-0.702588	0.00120909	0.00809319
0.285168	0.00144814	0.00924204	P32	FBgn0034259
0.346298	0.00192069	0.0112968	kis	FBgn0266557
0.364618	0.00272703	0.0148938	Su(var)205	FBgn0003607
-0.88129	0.00296095	0.0156692	Act87E	FBgn0000046
1.46815	0.00323287	0.0167587	Ubc6	FBgn0004436
0.284922	0.00354439	0.0178122	Rad23	FBgn0026777
0.43959	0.00359256	0.0180126	CG18004	FBgn0033566
0.247668	0.00364292	0.0181963	Top2	FBgn0003732
0.42554	0.00462921	0.0217141	Rga	FBgn0017550
0.345998	0.00470617	0.0219364	Mnn1	FBgn0031885
0.19856	0.00500426	0.0230289	Dp1	FBgn0027835
0.462212	0.00604964	0.0264033	dre4	FBgn0002183
0.486332	0.00670345	0.0285669	CkIalpha	FBgn0015024
-1.65609	0.00744427	0.0307947	Suv3	FBgn0037232
0.232968	0.00780334	0.031887
-1.6887	0.00919252	0.0360804	Rpb4	FBgn0263757
0.243616	0.0160522	0.0545968	eIF4E1	FBgn0015218
0.26367	0.0163493	0.0552948	Nlp	FBgn0016685
0.475884	0.0184326	0.0603194	RPA3	FBgn0266421
-0.471542	0.0186315	0.0607701	Trl	FBgn0013263
0.212272	0.0204032	0.0649505	eIF4G1	FBgn0023213
0.437798	0.0227325	0.0710012	vtd	FBgn0260987
-0.606572	0.0231452	0.0720073	Bap60	FBgn0025463
0.276144	0.0251413	0.0760167	Rcd1	FBgn0033897
0.423662	0.025944	0.0777342	RpII15	FBgn0004855
0.439838	0.0280187	0.0819134	DMAP1	FBgn0034537
0.134522	0.032396	0.0908367	Ald	FBgn0000064
-0.38133	0.0345724	0.0953919	Invadolysin	FBgn0086359
-1.33	0.0359492	0.0978291	Slbp	FBgn0041186
-1.17785	0.0385447	0.103132	Mms19	FBgn0037301
-1.22139	0.040401	0.10709	CSN1b	FBgn0027057
0.481404	0.0418455	0.110257	Rrp1	FBgn0004584
-1.51801	0.0421428	0.11082	CSN5	FBgn0027053
0.156822	0.0482917	0.122846	Rcc1	FBgn0002638
0.21001	0.0518687	0.129786	Mi-2	FBgn0262519
0.899172	0.0676708	0.155526	Myb	FBgn0002914
0.164242	0.0677672	0.155657	Spt5	FBgn0040273
0.256408	0.069539	0.157812	Set	FBgn0014879
-1.32563	0.0736756	0.164477	CSN6	FBgn0028837
-0.274066	0.0789188	0.172978	mle	FBgn0002774
0.25414	0.0852002	0.18321	pn	FBgn0003116
0.610818	0.0873324	0.186886	DNApol-eta	FBgn0037141
0.235468	0.0936952	0.196899	RpA-70	FBgn0010173
0.217308	0.10963	0.219923	XRCC1	FBgn0026751
0.377896	0.111568	0.222954	Pp1-87B	FBgn0004103
0.14829	0.115497	0.228011	mod(mdg4)	FBgn0002781
0.139802	0.121509	0.23694	Iswi	FBgn0011604
-0.105186	0.12945	0.248884	RpS3	FBgn0002622
-0.182756	0.134038	0.255726	Caf1-55	FBgn0263979
1.11993	0.152162	0.279573	sls	FBgn0086906
0.102868	0.159679	0.290033	larp	FBgn0261618
0.163082	0.171373	0.305005	EndoG	FBgn0033690
-0.111006	0.191534	0.330648	EndoGI	FBgn0028515
0.10698	0.197388	0.338281	Tctp	FBgn0037874
0.311494	0.213116	0.357829	pita	FBgn0034878
0.224522	0.225282	0.372132	pic	FBgn0260962
0.110184	0.259407	0.409775	Dsp1	FBgn0011764
0.084344	0.260561	0.410781	eIF4A	FBgn0001942
-0.28252	0.262749	0.412758	Nup107	FBgn0027868
-0.33411	0.27624	0.429036	flfl	FBgn0024555
-0.420396	0.297693	0.451422	Rpb5	FBgn0033571
0.373582	0.32662	0.480089	gkt	FBgn0260817
0.086096	0.329437	0.482801	me31B	FBgn0004419
0.101852	0.343173	0.495805	pont	FBgn0040078
0.166376	0.350087	0.501651	Top1	FBgn0004924
0.19979	0.351732	0.503233	enok	FBgn0034975
0.142626	0.352581	0.503904	HP1b	FBgn0030082
0.95445	0.362539	0.512609	Rpb8	FBgn0037121
0.112968	0.371521	0.522088	Fmr1	FBgn0028734
0.236424	0.385459	0.534042	Ald	FBgn0000064
-0.139952	0.391199	0.540635	MRG15	FBgn0027378
-0.27989	0.402482	0.551627	Nurf-38	FBgn0016687
0.360084	0.405394	0.55428	CSN4	FBgn0027054
0.409994	0.428356	0.574804	14-3-3epsilon	FBgn0020238
0.07832	0.448647	0.594607	Bap55	FBgn0025716
0.064664	0.457723	0.60202	14-3-3epsilon	FBgn0020238
-0.17052	0.500221	0.637092	sls	FBgn0086906
0.082454	0.55773	0.687608	SkpA	FBgn0025637
-0.063184	0.562857	0.691356	SMC1	FBgn0040283
0.243744	0.56539	0.692328	Xpc	FBgn0004698
0.033454	0.576305	0.700945	Nurf-38	FBgn0016687
0.08446	0.60319	0.72194	wds	FBgn0040066
-0.171942	0.621523	0.73617	XNP	FBgn0039338
0.114248	0.636969	0.749539	Gnf1	FBgn0004913
-0.055022	0.645866	0.755951	koi	FBgn0265003
0.074336	0.679749	0.77894	gfzf	FBgn0250732
0.068	0.679809	0.77894	MBD-R2	FBgn0038016
0.052428	0.697846	0.794342	Nap1	FBgn0015268
0.034406	0.709678	0.803439	rept	FBgn0040075
0.068212	0.711022	0.804046	CG42374	FBgn0259720
-0.0845	0.711672	0.804453	dom	FBgn0020306
0.0352	0.726034	0.814764	nsl1	FBgn0262527
0.076632	0.730028	0.817523	E2f2	FBgn0024371
0.034686	0.79105	0.863081	His3	FBgn0001199
-0.091914	0.792098	0.863081	Arp8	FBgn0030877
-0.031298	0.829266	0.889609	lwr	FBgn0010602
0.099808	0.82945	0.889609	Cul4	FBgn0033260
0.069646	0.830643	0.890075	Ddx1	FBgn0015075
-0.016776	0.831428	0.89032	RpLP0	FBgn0000100
0.048764	0.831993	0.89047	M1BP	FBgn0037621
-0.109266	0.837566	0.894483	Spf45	FBgn0086683
0.030022	0.854727	0.907206	Dsor1	FBgn0010269
0.046332	0.865116	0.913842	Su(var)2-10	FBgn0003612
0.038668	0.866329	0.91488	CSN3	FBgn0027055
-0.019426	0.872685	0.919882	RpII215	FBgn0003277
0.026042	0.897189	0.935543	Df31	FBgn0022893
-0.030206	0.904123	0.939324	NC2beta	FBgn0028926
0.021558	0.94032	0.964829	dgt1	FBgn0039710
0.033574	0.968986	0.980827	phr	FBgn0003082
0.008444	0.988112	0.992606	CSN7	FBgn0028836

## Sheet: Thorax
logFC	P.Value	adj.P.Val	flybase	symbol
1.83586	0.000253765	0.00967354	FBgn0015664	Dref
-2.14855	0.00038886	0.0115514	FBgn0026777	Rad23
-1.0939	0.0056005	0.0589603	FBgn0010602	lwr
0.364275	0.0157925	0.103584	FBgn0002638	Rcc1
2.16189	0.0309952	0.151104	FBgn0011764	Dsp1
-0.217776	0.0319939	0.155262	FBgn0023213	eIF4G1
1.50766	0.0372615	0.169276	FBgn0028734	Fmr1
-0.191781	0.0391298	0.172596	FBgn0000064	Ald
-0.298862	0.0457121	0.188822	FBgn0033690	EndoG
-0.241118	0.0994927	0.294467	FBgn0037874	Tctp
0.733396	0.113107	0.313845	FBgn0002781	mod(mdg4)
-0.361662	0.127453	0.337134	FBgn0027338	Kap-alpha3
0.449696	0.128906	0.338596	FBgn0004103	Pp1-87B
-0.773239	0.149543	0.369786	FBgn0015024	CkIalpha
-0.281915	0.180899	0.40765	FBgn0265003	koi
-0.157255	0.182183	0.408923	FBgn0086906	sls
0.200292	0.207844	0.438349	FBgn0001200	His4
-0.468723	0.242703	0.47661	FBgn0022893	Df31
0.737078	0.247232	0.4807	FBgn0261618	larp
1.01354	0.252577	0.487618	FBgn0004855	RpII15
0.286277	0.269082	0.505723	FBgn0015268	Nap1
0.595903	0.293608	0.528263	FBgn0040075	rept
-0.093188	0.306713	0.542797	FBgn0002622	RpS3
-0.222315	0.306933	0.542797	FBgn0028515	EndoGI
0.320021	0.322486	0.559861	FBgn0001199	His3
-0.185482	0.336757	0.574989	FBgn0016685	Nlp
-0.0845505	0.437356	0.655745	FBgn0016687	Nurf-38
-0.458152	0.451309	0.67092	FBgn0015218	eIF4E1
0.0772955	0.487666	0.696316	FBgn0001942	eIF4A
-0.378593	0.492957	0.699752	FBgn0040078	pont
-0.572836	0.502829	0.705232	FBgn0266557	kis
0.414247	0.544281	0.737514	FBgn0025637	SkpA
0.197443	0.547336	0.739512	FBgn0037141	DNApol-eta
-0.0788015	0.56625	0.750603	FBgn0038805	TFAM
-0.125336	0.578535	0.760034	FBgn0040284	SF2
-0.0729635	0.596485	0.773121	FBgn0027835	Dp1
-0.084039	0.603059	0.777216	FBgn0020238	14-3-3epsilon
0.0635625	0.622783	0.792317	FBgn0053855	His1:CG33855
0.031882	0.636345	0.802394	FBgn0086906	sls
0.044601	0.729072	0.862244	FBgn0034259	P32
-0.0357475	0.742217	0.870006	FBgn0000100	RpLP0
-0.161414	0.781773	0.89222	FBgn0000541	E(bx)
0.173752	0.866792	0.9343	FBgn0000064	Ald
0.019071	0.919652	0.961032	FBgn0003607	Su(var)205
0.0062205	0.970007	0.986477	FBgn0000046	Act87E
-0.0052855	0.992638	0.995737	FBgn0004419	me31B
