# Supplementary material for: Tissue-specific modulation of gene expression in response to lowered insulin signalling in Drosophila
Source: eLife. 2021 Apr 21;10:e67275. doi: 10.7554/eLife.67275 (PMC8060030; doi:10.7554/eLife.67275)
Supplement: Supplementary file 10. — Columns listed in summary tab. [file elife-67275-supp10.xlsx]

## Sheet: Summary
Analysis of transposon differential expression in dilp2-3,5 flies (with/without Wolbachia) vs. wDah, at day 10
transposon counts are normalized to full library (i.e. gene transcript counts + transposon transcript counts)
logFC	log2(fold-change)
logCPM	log(counts per million) expression level ~ similar to RPKM, but does not consider transcript length
LR	statistic of the edgeR likelihood ratio test
PValue	p-value
adj.PValue	Benjamini-Hochberg adjusted p-value (= FDR)
Short name	Genotype	Wolbachia infection status
DPP	dilp2-3,5	plus
WTP	wDah	plus
DPM	dilp2-3,5	minus
WTM	wDah	minus
P		plus
M		Minus
Interaction_'Tissue' (Fat, Gut, Brain, Thorax)		Interaction between genotype (dilp2-3,5 vs wDah) and wolbachia infection status (P vs M)
DPPvsWTP_'Tissue" (Fat, Gut, Brain, Thorax)		Comparison between genotype (dilp2-3,5 vs wDah) and wolbachia infection status (P)
DPPvsDPM_'Tissue" (Fat, Gut, Brain, Thorax)		Comparison between genotype (dilp2-3,5) and wolbachia infection status (PvsM)
WTPvsWTM_'Tissue" (Fat, Gut, Brain, Thorax)		Comparison between genotype (wDah) and wolbachia infection status (PvsM)
DPMvsWTM_'Tissue" (Fat, Gut, Brain, Thorax)		Interaction between genotype (dilp2-3,5 vs wDah) and wolbachia infection status (M)

## Sheet: interaction_Fat
	logFC	logCPM	LR	PValue	adj.PValue
FLYBASE;FBgn0002745;micropia.	1.8	5.4	82	1.1e-19	1.3e-17
FLYBASE;FBgn0003490;springer.	0.76	6.9	13	0.0004	0.023
FLYBASE;FBgn0000005;297.	0.6	6.6	6.6	0.0099	0.095
FLYBASE;FBgn0001100;G-element.	-1.1	0.85	6.2	0.013	0.095
FLYBASE;FBgn0003519;Stalker.	0.56	4.9	8	0.0048	0.095
FLYBASE;FBgn0020425;Helena.	-0.88	1.6	7	0.0083	0.095
FLYBASE;FBgn0022937;Circe.	-0.77	1.8	6.4	0.011	0.095
FLYBASE;FBgn0063431;gypsy6.	-0.89	2.8	6.8	0.0093	0.095
FLYBASE;FBgn0063434;gypsy3.	-1.1	2.3	7.8	0.0053	0.095
FLYBASE;FBgn0063439;diver2.	-0.98	3.4	7.7	0.0055	0.095
FLYBASE;FBgn0063455;Stalker2.	0.57	4	7.6	0.0057	0.095
FLYBASE;FBgn0063533;Doc3-element.	-0.87	4.7	6.6	0.01	0.095
FLYBASE;FBgn0067384;gypsy7.	-0.82	2.2	6.2	0.013	0.095
FLYBASE;FBgn0067385;invader6.	-0.82	1.6	6.5	0.011	0.095
FLYBASE;FBgn0067624;BS3.	-1	0.98	8.3	0.004	0.095
FLYBASE;FBgnnnnnnnn;HMS-Beagle2.	-0.72	4.3	6.4	0.012	0.095
FLYBASE;FBgn0000004;17.6.	0.53	6.2	6	0.014	0.096
FLYBASE;FBgn0000652;F-element.	-0.75	5.3	5.6	0.018	0.096
FLYBASE;FBgn0001167;gypsy.	0.51	8.5	5.9	0.015	0.096
FLYBASE;FBgn0015786;Porto1.	-0.85	0.6	5.7	0.017	0.096
FLYBASE;FBgn0061513;frogger.	-1.2	0.91	5.4	0.02	0.096
FLYBASE;FBgn0063394;rooA.	0.5	5.4	5.6	0.018	0.096
FLYBASE;FBgn0063433;gypsy4.	-0.79	5.1	5.4	0.02	0.096
FLYBASE;FBgn0063507;G2.	-0.84	1.1	5.8	0.016	0.096
FLYBASE;FBgn0067386;gypsy11.	-1.3	-0.44	5.4	0.021	0.096
FLYBASE;FBgn0063897;Stalker4.	0.46	5.3	5.2	0.023	0.1
FLYBASE;FBgn0010302;Burdock.	0.62	6.1	5	0.026	0.11
FLYBASE;FBgn0015945;GATE.	-0.69	3.9	4.8	0.029	0.11
FLYBASE;FBgn0063467;Rt1c.	-0.77	0.12	5	0.026	0.11
FLYBASE;FBgn0063594;Cr1a.	-0.63	5.1	4.7	0.029	0.11
FLYBASE;FBgn0067421;Fw2.	-0.97	0.64	5	0.025	0.11
FLYBASE;FBgn0002697;mdg1.	0.44	4.7	4.4	0.035	0.12
FLYBASE;FBgn0042231;X-element.	-0.61	4.2	4.3	0.038	0.12
FLYBASE;FBgn0063435;gypsy2.	-0.71	2.9	4.5	0.034	0.12
FLYBASE;FBgn0063440;baggins.	-0.76	3.8	4.6	0.033	0.12
FLYBASE;FBgn0063534;Doc2-element.	-0.65	4	4.5	0.035	0.12
FLYBASE;FBgn0063402;looper1.	-0.83	-0.71	4.1	0.042	0.13
FLYBASE;FBgn0043055;Ivk.	-0.65	2.3	3.8	0.053	0.16
FLYBASE;FBgn0003908;R1A1-element.	-0.47	5.1	3.6	0.059	0.17
FLYBASE;FBgn0067405;R1-2.	-0.83	-0.24	3.6	0.057	0.17
FLYBASE;FBgn0044355;Quasimodo.	-0.5	5.3	3.5	0.062	0.18
FLYBASE;FBgn0063371;transib2.	-0.57	1.8	3.2	0.072	0.2
FLYBASE;FBgn0063917;McClintock.	-0.55	1.4	3.1	0.078	0.21
FLYBASE;FBgn0063466;S2.	-0.77	-0.68	2.9	0.09	0.23
FLYBASE;FBgn0063782;accord2.	-0.51	2.2	2.9	0.088	0.23
FLYBASE;FBgn0015168;Dsim\ninja.	-0.59	2.2	2.3	0.13	0.29
FLYBASE;FBgn0045970;Tabor.	-0.44	3.3	2.4	0.12	0.29
FLYBASE;FBgn0063429;invader2.	-0.48	3.4	2.5	0.12	0.29
FLYBASE;FBgn0063430;invader1.	-0.53	2.7	2.3	0.13	0.29
FLYBASE;FBgn0063432;gypsy5.	-0.43	0.79	2.4	0.12	0.29
FLYBASE;FBgn0067382;gypsy9.	-0.81	-1.4	2.4	0.12	0.29
FLYBASE;FBgn0067385;gypsy12.	-0.32	1.9	2.3	0.13	0.29
FLYBASE;FBgn0069433;G5A.	-0.44	1.8	2.3	0.13	0.29
FLYBASE;FBgn0004905;S-element.	-0.32	2.4	2.2	0.14	0.3
FLYBASE;FBgn0040267;Transpac.	0.34	6.9	2	0.15	0.32
FLYBASE;FBgn0063506;G3.	-0.61	-0.53	2.1	0.15	0.32
FLYBASE;FBgn0046110;Juan.	0.31	3.3	1.9	0.16	0.33
FLYBASE;FBgn0063370;transib3.	-0.37	1.9	2	0.16	0.33
FLYBASE;FBgn0063436;gtwin.	0.28	5.3	1.9	0.17	0.33
FLYBASE;FBgn0000199;blood.	0.26	6.2	1.9	0.17	0.34
FLYBASE;FBgn0000007;1731.	0.4	3.8	1.8	0.18	0.35
FLYBASE;FBgn0023131;ZAM.	-0.5	-1.2	1.8	0.19	0.35
FLYBASE;FBgn0067381;hopper2.	-0.45	-0.51	1.7	0.2	0.37
FLYBASE;FBgn0002949;NOF.	-0.37	0.65	1.5	0.21	0.39
FLYBASE;FBgn0003055;P-element.	0.17	3.2	1.4	0.24	0.43
FLYBASE;FBgn0067420;Fw3.	-0.46	-1.5	1.4	0.24	0.43
FLYBASE;FBgn0000638;FB.	-0.22	4.2	1.2	0.26	0.45
FLYBASE;FBgn0063428;invader3.	-0.33	2.3	1.3	0.26	0.45
FLYBASE;FBgn0069587;Doc4-element.	-0.44	0.073	1.2	0.27	0.45
FLYBASE;FBgn0000006;412.	0.22	5	1.2	0.27	0.46
FLYBASE;FBgn0061485;rover.	0.24	3	1.2	0.28	0.46
FLYBASE;FBgn0000349;copia.	0.25	13	1	0.31	0.48
FLYBASE;FBgn0010103;aurora-element.	-0.45	1.7	1.1	0.3	0.48
FLYBASE;FBgn0014967;hopper.	-0.3	2.1	1	0.31	0.48
FLYBASE;FBgn0043969;diver.	-0.28	3.5	1.1	0.3	0.48
FLYBASE;FBgn0063425;jockey2.	-0.32	1	1	0.32	0.48
FLYBASE;FBgn0067383;gypsy8.	-0.34	0.037	1	0.31	0.48
FLYBASE;FBgn0026065;Idefix.	-0.25	4.7	0.91	0.34	0.5
FLYBASE;FBgn0026410;Tc1.	-0.24	2.7	0.89	0.34	0.5
FLYBASE;FBgn0067387;gypsy10.	-0.28	2.1	0.92	0.34	0.5
FLYBASE;FBgn0041728;Rt1a.	-0.47	-2	0.86	0.35	0.51
FLYBASE;FBgn0003007;opus.	-0.17	7.3	0.83	0.36	0.52
FLYBASE;FBgn0001210;hobo.	-0.21	3.4	0.74	0.39	0.55
FLYBASE;FBgn0000155;roo.	0.19	9.7	0.71	0.4	0.56
FLYBASE;FBgn0005673;1360.	-0.17	4.7	0.67	0.41	0.57
FLYBASE;FBgn0063504;G5.	-0.25	2.7	0.6	0.44	0.6
FLYBASE;FBgn0001249;I-element.	-0.19	3.2	0.53	0.46	0.61
FLYBASE;FBgn0026443;Dyak\TART.	-0.18	5.8	0.54	0.46	0.61
FLYBASE;FBgn0063450;Tom1.	0.25	-0.37	0.54	0.46	0.61
FLYBASE;FBgn0003122;pogo.	-0.16	4.1	0.51	0.48	0.62
FLYBASE;FBgn0026416;INE-1.	-0.19	-0.81	0.39	0.53	0.68
FLYBASE;FBgn0000224;BS.	-0.12	3.8	0.34	0.56	0.71
FLYBASE;FBgn0001207;HMS-Beagle.	-0.099	5.8	0.28	0.6	0.75
FLYBASE;FBgn0063372;transib1.	-0.24	0.0083	0.27	0.6	0.75
FLYBASE;FBgn0000481;Doc.	0.1	6.6	0.25	0.62	0.76
FLYBASE;FBgn0005773;Bari1.	0.099	1.7	0.25	0.62	0.76
FLYBASE;FBgn0063369;transib4.	0.16	0.36	0.22	0.64	0.76
FLYBASE;FBgn0063427;invader4.	0.16	3.4	0.23	0.63	0.76
FLYBASE;FBgn0063919;Max-element.	0.097	8	0.23	0.63	0.76
FLYBASE;FBgn0069343;TAHRE.	0.08	4.5	0.2	0.65	0.76
FLYBASE;FBgn0062343;Dm88.	-0.15	2.1	0.18	0.68	0.78
FLYBASE;FBgn0003909;R2-element.	-0.089	8.5	0.16	0.69	0.79
FLYBASE;FBgn0069340;Tc1-2.	0.08	3	0.14	0.71	0.81
FLYBASE;FBgn0001181;HB.	0.082	2.1	0.12	0.73	0.82
FLYBASE;FBgn0002698;mdg3.	-0.086	4.7	0.1	0.75	0.83
FLYBASE;FBgn0042682;Rt1b.	-0.073	6	0.096	0.76	0.83
FLYBASE;FBgn0063447;accord.	0.082	5.7	0.11	0.75	0.83
FLYBASE;FBgn0064134;Bari2.	0.11	-0.0044	0.057	0.81	0.88
FLYBASE;FBgn0014947;flea.	0.034	7.2	0.036	0.85	0.91
FLYBASE;FBgn0001283;jockey.	0.028	6.5	0.025	0.87	0.92
FLYBASE;FBgn0004141;HeT-A.	0.031	4.4	0.03	0.86	0.92
FLYBASE;FBgn0004082;Tirant.	-0.035	3.6	0.02	0.89	0.93
FLYBASE;FBgn0005384;3S18.	0.015	6.6	0.0081	0.93	0.95
FLYBASE;FBgn0063503;G6.	0.034	2.5	0.009	0.92	0.95
FLYBASE;FBgn0061191;Tc3.	-0.018	0.46	0.0027	0.96	0.96
FLYBASE;FBgn0063401;mariner2.	-0.017	1.2	0.0029	0.96	0.96
FLYBASE;FBgn0063505;G4.	-0.014	1.3	0.0023	0.96	0.96

## Sheet: DPPvsWTP_Fat
	logFC	logCPM	LR	PValue	adj.PValue	interaction_adj.PValue
FLYBASE;FBgn0000007;1731.	1.6	3.8	14	0.00018	0.0019	0.35
FLYBASE;FBgn0063394;rooA.	1.4	5.4	21	3.9e-06	9.7e-05	0.096
FLYBASE;FBgn0000005;297.	1.2	6.6	13	0.00028	0.0024	0.095
FLYBASE;FBgn0063455;Stalker2.	1.1	4	15	9e-05	0.0013	0.095
FLYBASE;FBgn0005384;3S18.	1	6.6	17	4.5e-05	0.00088	0.95
FLYBASE;FBgn0002697;mdg1.	1	4.7	12	0.00049	0.0038	0.12
FLYBASE;FBgn0000004;17.6.	1	6.2	11	0.001	0.0065	0.096
FLYBASE;FBgn0040267;Transpac.	0.95	6.9	8	0.0048	0.018	0.32
FLYBASE;FBgn0000224;BS.	0.79	3.8	6.9	0.0087	0.028	0.71
FLYBASE;FBgn0003519;Stalker.	0.66	4.9	5.5	0.019	0.047	0.095
FLYBASE;FBgn0063897;Stalker4.	0.63	5.3	4.9	0.027	0.059	0.1
FLYBASE;FBgn0063919;Max-element.	0.54	8	3.6	0.057	0.1	0.76
FLYBASE;FBgn0004905;S-element.	-0.59	2.4	3.8	0.052	0.094	0.3
FLYBASE;FBgn0001167;gypsy.	-0.63	8.5	4.4	0.036	0.072	0.096
FLYBASE;FBgn0000638;FB.	-0.67	4.2	5.9	0.015	0.041	0.45
FLYBASE;FBgn0001210;hobo.	-0.67	3.4	3.8	0.05	0.093	0.55
FLYBASE;FBgn0043969;diver.	-0.74	3.5	3.7	0.053	0.096	0.48
FLYBASE;FBgn0063505;G4.	-0.75	1.3	3.6	0.058	0.1	0.96
FLYBASE;FBgn0026410;Tc1.	-0.8	2.7	4.8	0.028	0.06	0.5
FLYBASE;FBgn0063917;McClintock.	-0.85	1.4	3.9	0.049	0.093	0.21
FLYBASE;FBgn0063432;gypsy5.	-0.86	0.79	5	0.025	0.057	0.29
FLYBASE;FBgn0063429;invader2.	-0.86	3.4	4.1	0.044	0.084	0.29
FLYBASE;FBgn0067387;gypsy10.	-0.95	2.1	5.2	0.023	0.055	0.5
FLYBASE;FBgn0026416;INE-1.	-0.96	-0.81	4.9	0.027	0.059	0.68
FLYBASE;FBgn0026065;Idefix.	-1	4.7	7.4	0.0066	0.021	0.5
FLYBASE;FBgn0063425;jockey2.	-1	1	4.9	0.027	0.059	0.48
FLYBASE;FBgn0067384;gypsy7.	-1	2.2	4.6	0.032	0.065	0.095
FLYBASE;FBgn0067385;gypsy12.	-1.1	1.9	15	0.00011	0.0014	0.29
FLYBASE;FBgn0002698;mdg3.	-1.1	4.7	8.7	0.0031	0.013	0.83
FLYBASE;FBgn0067385;invader6.	-1.1	1.6	6.1	0.013	0.039	0.095
FLYBASE;FBgn0063371;transib2.	-1.1	1.8	5.9	0.015	0.041	0.2
FLYBASE;FBgn0000652;F-element.	-1.1	5.3	5.8	0.016	0.042	0.096
FLYBASE;FBgn0020425;Helena.	-1.1	1.6	5	0.025	0.057	0.095
FLYBASE;FBgn0063507;G2.	-1.1	1.1	4.7	0.03	0.063	0.096
FLYBASE;FBgn0067420;Fw3.	-1.1	-1.5	4.1	0.044	0.084	0.43
FLYBASE;FBgn0044355;Quasimodo.	-1.2	5.3	9.8	0.0017	0.0092	0.18
FLYBASE;FBgn0063782;accord2.	-1.2	2.2	8.3	0.0039	0.015	0.23
FLYBASE;FBgn0002949;NOF.	-1.2	0.65	7.7	0.0056	0.02	0.39
FLYBASE;FBgn0063534;Doc2-element.	-1.2	4	7.5	0.0061	0.02	0.12
FLYBASE;FBgn0043055;Ivk.	-1.2	2.3	6.7	0.0099	0.03	0.16
FLYBASE;FBgn0063435;gypsy2.	-1.2	2.9	6.1	0.013	0.039	0.12
FLYBASE;FBgn0063440;baggins.	-1.2	3.8	6	0.014	0.041	0.12
FLYBASE;FBgn0063467;Rt1c.	-1.2	0.12	5.9	0.015	0.041	0.11
FLYBASE;FBgn0063402;looper1.	-1.2	-0.71	4.2	0.039	0.078	0.13
FLYBASE;FBgn0003908;R1A1-element.	-1.3	5.1	13	0.00028	0.0024	0.17
FLYBASE;FBgn0042231;X-element.	-1.3	4.2	9.3	0.0023	0.01	0.12
FLYBASE;FBgn0022937;Circe.	-1.3	1.8	9.2	0.0024	0.011	0.095
FLYBASE;FBgn0015168;Dsim\ninja.	-1.3	2.2	5.3	0.022	0.053	0.29
FLYBASE;FBgn0063594;Cr1a.	-1.4	5.1	11	0.00073	0.005	0.11
FLYBASE;FBgn0015945;GATE.	-1.4	3.9	9.7	0.0019	0.0094	0.11
FLYBASE;FBgn0063533;Doc3-element.	-1.4	4.7	8.2	0.0042	0.016	0.095
FLYBASE;FBgn0067382;gypsy9.	-1.4	-1.4	3.5	0.06	0.1	0.29
FLYBASE;FBgn0003490;springer.	-1.5	6.9	24	8.4e-07	3.3e-05	0.023
FLYBASE;FBgnnnnnnnn;HMS-Beagle2.	-1.5	4.3	13	0.00025	0.0024	0.095
FLYBASE;FBgn0063433;gypsy4.	-1.5	5.1	9.8	0.0017	0.0092	0.096
FLYBASE;FBgn0063431;gypsy6.	-1.5	2.8	9.4	0.0022	0.01	0.095
FLYBASE;FBgn0067405;R1-2.	-1.5	-0.24	5.7	0.017	0.042	0.17
FLYBASE;FBgn0003909;R2-element.	-1.6	8.5	25	4.9e-07	2.9e-05	0.79
FLYBASE;FBgn0069433;G5A.	-1.6	1.8	14	0.00017	0.0019	0.29
FLYBASE;FBgn0015786;Porto1.	-1.6	0.6	10	0.0014	0.0084	0.096
FLYBASE;FBgn0063439;diver2.	-1.6	3.4	10	0.0014	0.0084	0.095
FLYBASE;FBgn0063503;G6.	-1.6	2.5	9.3	0.0023	0.01	0.95
FLYBASE;FBgn0001100;G-element.	-1.7	0.85	8.5	0.0036	0.014	0.095
FLYBASE;FBgn0067421;Fw2.	-1.7	0.64	7.6	0.0057	0.02	0.11
FLYBASE;FBgn0063434;gypsy3.	-1.9	2.3	11	0.00072	0.005	0.095
FLYBASE;FBgn0063436;gtwin.	-2	5.3	44	3e-11	3.6e-09	0.33
FLYBASE;FBgn0067624;BS3.	-2.3	0.98	21	4.1e-06	9.7e-05	0.095
FLYBASE;FBgn0061513;frogger.	-3	0.91	16	6.5e-05	0.0011	0.096
FLYBASE;FBgn0063504;G5.	-0.84	2.7	3.3	0.07	0.12	0.6
FLYBASE;FBgn0063370;transib3.	-0.66	1.9	3.2	0.073	0.12	0.33
FLYBASE;FBgn0063427;invader4.	-0.84	3.4	3.1	0.076	0.13	0.76
FLYBASE;FBgn0063430;invader1.	-0.86	2.7	3.1	0.08	0.13	0.29
FLYBASE;FBgn0014967;hopper.	-0.71	2.1	2.9	0.086	0.14	0.48
FLYBASE;FBgn0005673;1360.	-0.51	4.7	2.9	0.086	0.14	0.57
FLYBASE;FBgn0010103;aurora-element.	-1	1.7	2.8	0.093	0.14	0.48
FLYBASE;FBgn0001207;HMS-Beagle.	-0.44	5.8	2.7	0.1	0.16	0.75
FLYBASE;FBgn0067386;gypsy11.	-1.1	-0.44	2.5	0.11	0.17	0.096
FLYBASE;FBgn0046110;Juan.	0.5	3.3	2.5	0.11	0.17	0.33
FLYBASE;FBgn0004082;Tirant.	-0.56	3.6	2.6	0.11	0.16	0.93
FLYBASE;FBgn0002745;micropia.	0.44	5.4	2.5	0.11	0.17	1.3e-17
FLYBASE;FBgn0063466;S2.	-0.88	-0.68	2.3	0.13	0.18	0.23
FLYBASE;FBgn0063428;invader3.	-0.63	2.3	2.3	0.13	0.18	0.45
FLYBASE;FBgn0001283;jockey.	0.38	6.5	2.3	0.13	0.18	0.92
FLYBASE;FBgn0069587;Doc4-element.	-0.8	0.073	2.1	0.15	0.2	0.45
FLYBASE;FBgn0063369;transib4.	-0.66	0.36	2.1	0.15	0.2	0.76
FLYBASE;FBgn0001249;I-element.	-0.54	3.2	2.1	0.15	0.2	0.61
FLYBASE;FBgn0026443;Dyak\TART.	-0.5	5.8	2	0.15	0.2	0.61
FLYBASE;FBgn0023131;ZAM.	-0.7	-1.2	1.9	0.17	0.22	0.35
FLYBASE;FBgn0042682;Rt1b.	-0.45	6	1.8	0.18	0.23	0.83
FLYBASE;FBgn0063506;G3.	-0.75	-0.53	1.7	0.19	0.25	0.32
FLYBASE;FBgn0003007;opus.	-0.33	7.3	1.6	0.21	0.27	0.52
FLYBASE;FBgn0063450;Tom1.	0.57	-0.37	1.5	0.22	0.28	0.61
FLYBASE;FBgn0063372;transib1.	-0.7	0.0083	1.2	0.28	0.35	0.75
FLYBASE;FBgn0003122;pogo.	-0.35	4.1	1.1	0.29	0.35	0.62
FLYBASE;FBgn0045970;Tabor.	-0.42	3.3	1.1	0.3	0.36	0.29
FLYBASE;FBgn0000481;Doc.	0.31	6.6	1.1	0.3	0.36	0.76
FLYBASE;FBgn0000155;roo.	0.33	9.7	1.1	0.3	0.36	0.56
FLYBASE;FBgn0063447;accord.	-0.37	5.7	1.1	0.31	0.36	0.83
FLYBASE;FBgn0062343;Dm88.	-0.49	2.1	0.93	0.33	0.4	0.78
FLYBASE;FBgn0063401;mariner2.	-0.38	1.2	0.8	0.37	0.44	0.96
FLYBASE;FBgn0014947;flea.	-0.2	7.2	0.58	0.44	0.52	0.91
FLYBASE;FBgn0067381;hopper2.	-0.36	-0.51	0.57	0.45	0.52	0.37
FLYBASE;FBgn0001181;HB.	-0.24	2.1	0.54	0.46	0.52	0.82
FLYBASE;FBgn0061485;rover.	-0.19	3	0.37	0.54	0.61	0.46
FLYBASE;FBgn0067383;gypsy8.	-0.26	0.037	0.32	0.57	0.64	0.48
FLYBASE;FBgn0005773;Bari1.	-0.15	1.7	0.28	0.6	0.66	0.76
FLYBASE;FBgn0000199;blood.	-0.14	6.2	0.27	0.6	0.66	0.34
FLYBASE;FBgn0061191;Tc3.	-0.23	0.46	0.22	0.64	0.7	0.96
FLYBASE;FBgn0069340;Tc1-2.	-0.1	3	0.12	0.73	0.79	0.81
FLYBASE;FBgn0004141;HeT-A.	-0.076	4.4	0.091	0.76	0.81	0.92
FLYBASE;FBgn0000349;copia.	-0.096	13	0.077	0.78	0.82	0.48
FLYBASE;FBgn0000006;412.	-0.073	5	0.066	0.8	0.83	0.46
FLYBASE;FBgn0064134;Bari2.	-0.14	-0.0044	0.047	0.83	0.86	0.88
FLYBASE;FBgn0010302;Burdock.	-0.078	6.1	0.039	0.84	0.87	0.11
FLYBASE;FBgn0069343;TAHRE.	-0.036	4.5	0.021	0.89	0.9	0.76
FLYBASE;FBgn0003055;P-element.	0.026	3.2	0.016	0.9	0.91	0.43
FLYBASE;FBgn0041728;Rt1a.	0.021	-2	0.00098	0.98	0.98	0.51

## Sheet: DPPvsDPM_Fat
	logFC	logCPM	LR	PValue	adj.PValue
FLYBASE;FBgn0005384;3S18.	-0.81	6.6	11	0.0009	0.053
FLYBASE;FBgn0000007;1731.	1.4	3.8	11	0.00091	0.053
FLYBASE;FBgn0020425;Helena.	-1.4	1.6	8.1	0.0043	0.12
FLYBASE;FBgn0003007;opus.	-0.73	7.3	7.9	0.0048	0.12
FLYBASE;FBgn0015168;Dsim\ninja.	-1.6	2.2	7.8	0.0052	0.12
FLYBASE;FBgn0000006;412.	0.74	5	6.8	0.0094	0.16
FLYBASE;FBgn0067384;gypsy7.	-1.2	2.2	6.7	0.0095	0.16
FLYBASE;FBgn0003909;R2-element.	-0.79	8.5	6.3	0.012	0.18
FLYBASE;FBgn0063439;diver2.	-1.2	3.4	5.6	0.018	0.24
FLYBASE;FBgn0063533;Doc3-element.	-1.1	4.7	5.4	0.02	0.24
FLYBASE;FBgn0042231;X-element.	-0.94	4.2	5	0.025	0.27
FLYBASE;FBgn0010103;aurora-element.	-1.3	1.7	4.8	0.029	0.28
FLYBASE;FBgn0000652;F-element.	-0.96	5.3	4.6	0.032	0.29
FLYBASE;FBgn0067421;Fw2.	-1.3	0.64	4.4	0.037	0.31
FLYBASE;FBgn0063431;gypsy6.	-0.99	2.8	4.2	0.041	0.31
FLYBASE;FBgn0063433;gypsy4.	-0.98	5.1	4.1	0.043	0.31
FLYBASE;FBgn0061513;frogger.	-1.6	0.91	3.7	0.054	0.35
FLYBASE;FBgn0067624;BS3.	-1	0.98	3.7	0.055	0.35
FLYBASE;FBgn0063430;invader1.	-0.94	2.7	3.6	0.057	0.35
FLYBASE;FBgn0001207;HMS-Beagle.	-0.5	5.8	3.5	0.062	0.36
FLYBASE;FBgn0063594;Cr1a.	-0.74	5.1	3.3	0.068	0.38
FLYBASE;FBgn0026065;Idefix.	-0.66	4.7	3.2	0.073	0.39
FLYBASE;FBgn0063427;invader4.	-0.83	3.4	3.1	0.08	0.4
FLYBASE;FBgn0063440;baggins.	-0.89	3.8	3	0.081	0.4
FLYBASE;FBgn0003519;Stalker.	0.48	4.9	3	0.085	0.4
FLYBASE;FBgn0067385;invader6.	-0.77	1.6	2.8	0.092	0.41
FLYBASE;FBgn0063534;Doc2-element.	-0.73	4	2.7	0.098	0.43
FLYBASE;FBgnnnnnnnn;HMS-Beagle2.	-0.66	4.3	2.6	0.1	0.43
FLYBASE;FBgn0015945;GATE.	-0.73	3.9	2.6	0.11	0.43
FLYBASE;FBgn0044355;Quasimodo.	-0.6	5.3	2.5	0.12	0.45
FLYBASE;FBgn0067405;R1-2.	-1	-0.24	2.4	0.12	0.45
FLYBASE;FBgn0004082;Tirant.	-0.54	3.6	2.4	0.12	0.45
FLYBASE;FBgn0063434;gypsy3.	-0.84	2.3	2.2	0.14	0.48
FLYBASE;FBgn0063425;jockey2.	-0.68	1	2	0.15	0.52
FLYBASE;FBgn0000005;297.	0.46	6.6	2	0.16	0.52
FLYBASE;FBgn0026443;Dyak\TART.	-0.47	5.8	1.8	0.18	0.57
FLYBASE;FBgn0063394;rooA.	0.4	5.4	1.8	0.18	0.57
FLYBASE;FBgn0062343;Dm88.	-0.65	2.1	1.6	0.2	0.6
FLYBASE;FBgn0010302;Burdock.	-0.5	6.1	1.6	0.2	0.6
FLYBASE;FBgn0003055;P-element.	0.26	3.2	1.6	0.21	0.6
FLYBASE;FBgn0022937;Circe.	-0.54	1.8	1.6	0.21	0.6
FLYBASE;FBgn0063897;Stalker4.	0.35	5.3	1.5	0.22	0.61
FLYBASE;FBgn0063402;looper1.	-0.7	-0.71	1.4	0.23	0.63
FLYBASE;FBgn0063919;Max-element.	-0.32	8	1.3	0.25	0.65
FLYBASE;FBgn0067420;Fw3.	-0.67	-1.5	1.3	0.25	0.65
FLYBASE;FBgn0000199;blood.	0.3	6.2	1.3	0.26	0.65
FLYBASE;FBgn0003490;springer.	0.34	6.9	1.3	0.26	0.65
FLYBASE;FBgn0002697;mdg1.	0.32	4.7	1.2	0.27	0.65
FLYBASE;FBgn0026416;INE-1.	-0.51	-0.81	1.2	0.28	0.66
FLYBASE;FBgn0063455;Stalker2.	0.3	4	1.1	0.3	0.7
FLYBASE;FBgn0061485;rover.	0.32	3	1	0.31	0.72
FLYBASE;FBgn0026410;Tc1.	-0.37	2.7	0.99	0.32	0.72
FLYBASE;FBgn0004905;S-element.	-0.3	2.4	0.97	0.33	0.72
FLYBASE;FBgn0014947;flea.	-0.24	7.2	0.9	0.34	0.72
FLYBASE;FBgn0001100;G-element.	0.56	0.85	0.89	0.34	0.72
FLYBASE;FBgn0063370;transib3.	-0.35	1.9	0.88	0.35	0.72
FLYBASE;FBgn0063507;G2.	-0.46	1.1	0.87	0.35	0.72
FLYBASE;FBgn0003122;pogo.	-0.29	4.1	0.8	0.37	0.74
FLYBASE;FBgn0003908;R1A1-element.	-0.31	5.1	0.75	0.39	0.74
FLYBASE;FBgn0045970;Tabor.	-0.35	3.3	0.74	0.39	0.74
FLYBASE;FBgn0063503;G6.	0.44	2.5	0.73	0.39	0.74
FLYBASE;FBgn0063435;gypsy2.	-0.4	2.9	0.71	0.4	0.74
FLYBASE;FBgn0063371;transib2.	-0.38	1.8	0.71	0.4	0.74
FLYBASE;FBgn0067382;gypsy9.	-0.62	-1.4	0.65	0.42	0.74
FLYBASE;FBgn0063782;accord2.	-0.35	2.2	0.65	0.42	0.74
FLYBASE;FBgn0043055;Ivk.	-0.39	2.3	0.65	0.42	0.74
FLYBASE;FBgn0000155;roo.	0.25	9.7	0.63	0.43	0.74
FLYBASE;FBgn0063429;invader2.	-0.34	3.4	0.62	0.43	0.74
FLYBASE;FBgn0069433;G5A.	-0.32	1.8	0.59	0.44	0.75
FLYBASE;FBgn0063369;transib4.	0.36	0.36	0.54	0.46	0.77
FLYBASE;FBgn0014967;hopper.	-0.3	2.1	0.51	0.47	0.77
FLYBASE;FBgn0063436;gtwin.	-0.21	5.3	0.51	0.48	0.77
FLYBASE;FBgn0067387;gypsy10.	-0.3	2.1	0.49	0.49	0.78
FLYBASE;FBgn0005673;1360.	-0.2	4.7	0.47	0.49	0.78
FLYBASE;FBgn0063372;transib1.	-0.47	0.0083	0.46	0.5	0.78
FLYBASE;FBgn0067381;hopper2.	-0.32	-0.51	0.42	0.52	0.79
FLYBASE;FBgn0069587;Doc4-element.	-0.36	0.073	0.41	0.52	0.79
FLYBASE;FBgn0063505;G4.	0.26	1.3	0.39	0.53	0.8
FLYBASE;FBgn0063506;G3.	-0.35	-0.53	0.34	0.56	0.83
FLYBASE;FBgn0002745;micropia.	0.16	5.4	0.32	0.57	0.83
FLYBASE;FBgn0063447;accord.	-0.19	5.7	0.29	0.59	0.83
FLYBASE;FBgn0042682;Rt1b.	-0.18	6	0.29	0.59	0.83
FLYBASE;FBgn0001249;I-element.	0.2	3.2	0.28	0.59	0.83
FLYBASE;FBgn0001210;hobo.	-0.18	3.4	0.28	0.6	0.83
FLYBASE;FBgn0000349;copia.	0.18	13	0.27	0.6	0.83
FLYBASE;FBgn0005773;Bari1.	0.14	1.7	0.22	0.64	0.87
FLYBASE;FBgn0063467;Rt1c.	-0.22	0.12	0.2	0.66	0.87
FLYBASE;FBgn0069343;TAHRE.	0.11	4.5	0.19	0.66	0.87
FLYBASE;FBgn0002949;NOF.	-0.19	0.65	0.18	0.67	0.87
FLYBASE;FBgn0067386;gypsy11.	-0.33	-0.44	0.18	0.67	0.87
FLYBASE;FBgn0063432;gypsy5.	-0.15	0.79	0.14	0.71	0.91
FLYBASE;FBgn0061191;Tc3.	0.18	0.46	0.12	0.73	0.93
FLYBASE;FBgn0063450;Tom1.	0.15	-0.37	0.1	0.75	0.94
FLYBASE;FBgn0000004;17.6.	0.091	6.2	0.09	0.76	0.94
FLYBASE;FBgn0015786;Porto1.	-0.14	0.6	0.074	0.79	0.94
FLYBASE;FBgn0063504;G5.	-0.13	2.7	0.073	0.79	0.94
FLYBASE;FBgn0043969;diver.	-0.1	3.5	0.07	0.79	0.94
FLYBASE;FBgn0063466;S2.	-0.16	-0.68	0.063	0.8	0.94
FLYBASE;FBgn0001181;HB.	0.084	2.1	0.062	0.8	0.94
FLYBASE;FBgn0067385;gypsy12.	0.071	1.9	0.055	0.81	0.94
FLYBASE;FBgn0001283;jockey.	0.059	6.5	0.055	0.81	0.94
FLYBASE;FBgn0041728;Rt1a.	-0.15	-2	0.05	0.82	0.94
FLYBASE;FBgn0001167;gypsy.	-0.065	8.5	0.048	0.83	0.94
FLYBASE;FBgn0000224;BS.	-0.06	3.8	0.041	0.84	0.94
FLYBASE;FBgn0002698;mdg3.	0.072	4.7	0.036	0.85	0.94
FLYBASE;FBgn0063428;invader3.	-0.079	2.3	0.036	0.85	0.94
FLYBASE;FBgn0040267;Transpac.	0.05	6.9	0.022	0.88	0.95
FLYBASE;FBgn0000481;Doc.	-0.043	6.6	0.022	0.88	0.95
FLYBASE;FBgn0023131;ZAM.	0.076	-1.2	0.02	0.89	0.95
FLYBASE;FBgn0069340;Tc1-2.	0.036	3	0.013	0.91	0.97
FLYBASE;FBgn0004141;HeT-A.	-0.018	4.4	0.0052	0.94	0.98
FLYBASE;FBgn0063401;mariner2.	-0.029	1.2	0.0044	0.95	0.98
FLYBASE;FBgn0046110;Juan.	0.015	3.3	0.0021	0.96	0.98
FLYBASE;FBgn0067383;gypsy8.	-0.022	0.037	0.0021	0.96	0.98
FLYBASE;FBgn0000638;FB.	0.01	4.2	0.0013	0.97	0.98
FLYBASE;FBgn0064134;Bari2.	0.022	-0.0044	0.0011	0.97	0.98
FLYBASE;FBgn0063917;McClintock.	0.0095	1.4	0.00045	0.98	0.98

## Sheet: WTPvsWTM_Fat
	logFC	logCPM	LR	PValue	adj.PValue
FLYBASE;FBgn0002745;micropia.	-3.5	5.4	140	2.5e-31	3e-29
FLYBASE;FBgn0001100;G-element.	2.7	0.85	19	1.3e-05	0.00062
FLYBASE;FBgn0010302;Burdock.	-1.8	6.1	19	1.6e-05	0.00062
FLYBASE;FBgn0003490;springer.	-1.2	6.9	15	0.00011	0.0031
FLYBASE;FBgn0001167;gypsy.	-1.1	8.5	13	0.0003	0.007
FLYBASE;FBgn0005384;3S18.	-0.84	6.6	12	0.0006	0.012
FLYBASE;FBgn0015786;Porto1.	1.6	0.6	10	0.0016	0.024
FLYBASE;FBgn0000004;17.6.	-0.97	6.2	9.9	0.0017	0.024
FLYBASE;FBgn0063455;Stalker2.	-0.84	4	8.1	0.0043	0.056
FLYBASE;FBgn0067386;gypsy11.	2.3	-0.44	7.9	0.005	0.059
FLYBASE;FBgn0063467;Rt1c.	1.3	0.12	7.4	0.0065	0.07
FLYBASE;FBgn0063436;gtwin.	-0.77	5.3	7.2	0.0073	0.071
FLYBASE;FBgn0063917;McClintock.	1.1	1.4	6.4	0.012	0.1
FLYBASE;FBgn0063507;G2.	1.2	1.1	6.1	0.013	0.11
FLYBASE;FBgn0063434;gypsy3.	1.3	2.3	6.1	0.014	0.11
FLYBASE;FBgn0063427;invader4.	-1.2	3.4	5.9	0.015	0.11
FLYBASE;FBgn0067385;gypsy12.	0.7	1.9	5.8	0.016	0.11
FLYBASE;FBgn0022937;Circe.	1	1.8	5.5	0.02	0.13
FLYBASE;FBgn0003519;Stalker.	-0.63	4.9	5.1	0.024	0.15
FLYBASE;FBgn0000005;297.	-0.73	6.6	4.9	0.026	0.15
FLYBASE;FBgn0063466;S2.	1.4	-0.68	4.8	0.028	0.16
FLYBASE;FBgn0067624;BS3.	1	0.98	4.7	0.03	0.16
FLYBASE;FBgn0063435;gypsy2.	1	2.9	4.6	0.032	0.16
FLYBASE;FBgn0023131;ZAM.	1.1	-1.2	4.2	0.041	0.2
FLYBASE;FBgn0063394;rooA.	-0.61	5.4	4	0.045	0.21
FLYBASE;FBgn0063897;Stalker4.	-0.57	5.3	4	0.046	0.21
FLYBASE;FBgn0043055;Ivk.	0.92	2.3	3.8	0.052	0.21
FLYBASE;FBgn0003909;R2-element.	-0.61	8.5	3.8	0.052	0.21
FLYBASE;FBgnnnnnnnn;HMS-Beagle2.	0.78	4.3	3.8	0.052	0.21
FLYBASE;FBgn0067385;invader6.	0.88	1.6	3.7	0.054	0.21
FLYBASE;FBgn0046110;Juan.	-0.61	3.3	3.7	0.055	0.21
FLYBASE;FBgn0002697;mdg1.	-0.55	4.7	3.5	0.062	0.22
FLYBASE;FBgn0040267;Transpac.	-0.63	6.9	3.5	0.063	0.22
FLYBASE;FBgn0063432;gypsy5.	0.71	0.79	3.3	0.068	0.23
FLYBASE;FBgn0063919;Max-element.	-0.52	8	3.3	0.068	0.23
FLYBASE;FBgn0003908;R1A1-element.	0.64	5.1	3.3	0.071	0.23
FLYBASE;FBgn0063371;transib2.	0.76	1.8	2.9	0.087	0.27
FLYBASE;FBgn0063402;looper1.	0.96	-0.71	2.9	0.091	0.28
FLYBASE;FBgn0063431;gypsy6.	0.78	2.8	2.7	0.1	0.3
FLYBASE;FBgn0000638;FB.	0.45	4.2	2.6	0.11	0.3
FLYBASE;FBgn0063782;accord2.	0.68	2.2	2.6	0.11	0.3
FLYBASE;FBgn0001249;I-element.	0.59	3.2	2.5	0.11	0.32
FLYBASE;FBgn0063439;diver2.	0.77	3.4	2.4	0.12	0.32
FLYBASE;FBgn0003007;opus.	-0.4	7.3	2.4	0.12	0.33
FLYBASE;FBgn0015945;GATE.	0.66	3.9	2.2	0.14	0.36
FLYBASE;FBgn0063506;G3.	0.87	-0.53	2.2	0.14	0.36
FLYBASE;FBgn0063429;invader2.	0.62	3.4	2.1	0.15	0.37
FLYBASE;FBgn0000007;1731.	0.62	3.8	2	0.15	0.37
FLYBASE;FBgn0063428;invader3.	0.58	2.3	2	0.16	0.38
FLYBASE;FBgn0067382;gypsy9.	1	-1.4	2	0.16	0.38
FLYBASE;FBgn0067383;gypsy8.	0.66	0.037	1.9	0.17	0.38
FLYBASE;FBgn0069433;G5A.	0.55	1.8	1.9	0.17	0.38
FLYBASE;FBgn0002949;NOF.	0.55	0.65	1.8	0.17	0.38
FLYBASE;FBgn0004082;Tirant.	-0.47	3.6	1.8	0.18	0.38
FLYBASE;FBgn0063534;Doc2-element.	0.58	4	1.8	0.18	0.39
FLYBASE;FBgn0063533;Doc3-element.	0.62	4.7	1.7	0.19	0.39
FLYBASE;FBgn0045970;Tabor.	0.54	3.3	1.7	0.19	0.39
FLYBASE;FBgn0061513;frogger.	0.79	0.91	1.7	0.2	0.4
FLYBASE;FBgn0063440;baggins.	0.64	3.8	1.6	0.2	0.4
FLYBASE;FBgn0063433;gypsy4.	0.6	5.1	1.6	0.21	0.4
FLYBASE;FBgn0063594;Cr1a.	0.51	5.1	1.6	0.21	0.4
FLYBASE;FBgn0043969;diver.	0.46	3.5	1.5	0.22	0.42
FLYBASE;FBgn0014947;flea.	-0.31	7.2	1.5	0.22	0.42
FLYBASE;FBgn0000652;F-element.	0.53	5.3	1.4	0.23	0.43
FLYBASE;FBgn0067381;hopper2.	0.58	-0.51	1.4	0.24	0.43
FLYBASE;FBgn0001207;HMS-Beagle.	-0.3	5.8	1.3	0.26	0.45
FLYBASE;FBgn0004905;S-element.	0.34	2.4	1.2	0.27	0.46
FLYBASE;FBgn0067405;R1-2.	0.65	-0.24	1.2	0.27	0.46
FLYBASE;FBgn0000006;412.	0.3	5	1.1	0.29	0.48
FLYBASE;FBgn0044355;Quasimodo.	0.4	5.3	1.1	0.29	0.48
FLYBASE;FBgn0041728;Rt1a.	0.79	-2	1.1	0.29	0.48
FLYBASE;FBgn0063370;transib3.	0.38	1.9	1.1	0.3	0.48
FLYBASE;FBgn0067421;Fw2.	0.6	0.64	1.1	0.31	0.49
FLYBASE;FBgn0063447;accord.	-0.36	5.7	0.99	0.32	0.5
FLYBASE;FBgn0069587;Doc4-element.	0.51	0.073	0.89	0.35	0.54
FLYBASE;FBgn0000349;copia.	-0.32	13	0.86	0.36	0.55
FLYBASE;FBgn0067384;gypsy7.	0.42	2.2	0.81	0.37	0.56
FLYBASE;FBgn0000481;Doc.	-0.25	6.6	0.73	0.39	0.59
FLYBASE;FBgn0020425;Helena.	0.4	1.6	0.72	0.4	0.59
FLYBASE;FBgn0063504;G5.	0.38	2.7	0.69	0.41	0.59
FLYBASE;FBgn0000199;blood.	-0.21	6.2	0.65	0.42	0.61
FLYBASE;FBgn0010103;aurora-element.	-0.45	1.7	0.56	0.45	0.64
FLYBASE;FBgn0063503;G6.	0.37	2.5	0.55	0.46	0.64
FLYBASE;FBgn0063505;G4.	0.28	1.3	0.53	0.46	0.64
FLYBASE;FBgn0014967;hopper.	0.3	2.1	0.53	0.47	0.64
FLYBASE;FBgn0015168;Dsim\ninja.	-0.38	2.2	0.51	0.48	0.64
FLYBASE;FBgn0063450;Tom1.	-0.34	-0.37	0.5	0.48	0.64
FLYBASE;FBgn0001210;hobo.	0.24	3.4	0.48	0.49	0.64
FLYBASE;FBgn0062343;Dm88.	-0.35	2.1	0.48	0.49	0.64
FLYBASE;FBgn0042231;X-element.	0.28	4.2	0.47	0.49	0.64
FLYBASE;FBgn0067387;gypsy10.	0.27	2.1	0.43	0.51	0.66
FLYBASE;FBgn0002698;mdg3.	0.24	4.7	0.42	0.52	0.66
FLYBASE;FBgn0000224;BS.	0.19	3.8	0.38	0.54	0.68
FLYBASE;FBgn0061485;rover.	-0.16	3	0.27	0.6	0.75
FLYBASE;FBgn0067420;Fw3.	0.24	-1.5	0.23	0.63	0.77
FLYBASE;FBgn0005673;1360.	0.14	4.7	0.22	0.64	0.77
FLYBASE;FBgn0026065;Idefix.	-0.17	4.7	0.21	0.65	0.78
FLYBASE;FBgn0061191;Tc3.	0.21	0.46	0.18	0.67	0.8
FLYBASE;FBgn0069340;Tc1-2.	-0.12	3	0.17	0.68	0.8
FLYBASE;FBgn0000155;roo.	-0.13	9.7	0.16	0.69	0.8
FLYBASE;FBgn0003055;P-element.	-0.081	3.2	0.15	0.69	0.8
FLYBASE;FBgn0026416;INE-1.	-0.13	-0.81	0.11	0.74	0.84
FLYBASE;FBgn0026410;Tc1.	0.12	2.7	0.11	0.74	0.84
FLYBASE;FBgn0004141;HeT-A.	-0.08	4.4	0.1	0.75	0.84
FLYBASE;FBgn0064134;Bari2.	-0.2	-0.0044	0.099	0.75	0.84
FLYBASE;FBgn0026443;Dyak\TART.	-0.1	5.8	0.091	0.76	0.84
FLYBASE;FBgn0063430;invader1.	0.12	2.7	0.061	0.8	0.87
FLYBASE;FBgn0001181;HB.	-0.08	2.1	0.06	0.81	0.87
FLYBASE;FBgn0005773;Bari1.	-0.063	1.7	0.051	0.82	0.88
FLYBASE;FBgn0069343;TAHRE.	-0.049	4.5	0.039	0.84	0.9
FLYBASE;FBgn0063369;transib4.	0.054	0.36	0.015	0.9	0.95
FLYBASE;FBgn0003122;pogo.	0.035	4.1	0.012	0.91	0.95
FLYBASE;FBgn0042682;Rt1b.	-0.032	6	0.0092	0.92	0.96
FLYBASE;FBgn0063425;jockey2.	-0.032	1	0.0054	0.94	0.97
FLYBASE;FBgn0063372;transib1.	0.013	0.0083	0.00045	0.98	0.99
FLYBASE;FBgn0001283;jockey.	0.0022	6.5	7.9e-05	0.99	0.99
FLYBASE;FBgn0063401;mariner2.	0.0036	1.2	7.5e-05	0.99	0.99

## Sheet: DPMvsWTM_Fat
	logFC	logCPM	LR	PValue	adj.PValue
FLYBASE;FBgn0002745;micropia.	-3.2	5.4	120	3.3e-27	3.9e-25
FLYBASE;FBgn0003490;springer.	-3	6.9	87	1e-20	5.9e-19
FLYBASE;FBgn0063436;gtwin.	-2.5	5.3	70	5.3e-17	2.1e-15
FLYBASE;FBgn0001167;gypsy.	-1.6	8.5	29	6.4e-08	1.9e-06
FLYBASE;FBgn0003909;R2-element.	-1.4	8.5	20	6.8e-06	0.00016
FLYBASE;FBgn0005384;3S18.	0.97	6.6	16	7.4e-05	0.0014
FLYBASE;FBgn0000224;BS.	1	3.8	12	0.00066	0.011
FLYBASE;FBgn0010302;Burdock.	-1.3	6.1	11	0.00094	0.014
FLYBASE;FBgn0063503;G6.	-1.7	2.5	9.9	0.0016	0.021
FLYBASE;FBgn0002698;mdg3.	-0.97	4.7	6.3	0.012	0.14
FLYBASE;FBgn0000199;blood.	-0.65	6.2	6	0.015	0.14
FLYBASE;FBgn0063427;invader4.	-1.2	3.4	6	0.015	0.14
FLYBASE;FBgn0061485;rover.	-0.67	3	4.5	0.034	0.31
FLYBASE;FBgn0063369;transib4.	-0.97	0.36	4.1	0.044	0.37
FLYBASE;FBgn0000007;1731.	0.81	3.8	3.5	0.062	0.49
FLYBASE;FBgn0000006;412.	-0.51	5	3.2	0.073	0.52
FLYBASE;FBgn0063505;G4.	-0.72	1.3	3.1	0.078	0.52
FLYBASE;FBgn0000349;copia.	-0.59	13	2.9	0.086	0.52
FLYBASE;FBgn0067386;gypsy11.	1.5	-0.44	2.9	0.088	0.52
FLYBASE;FBgn0067385;gypsy12.	-0.51	1.9	2.9	0.089	0.52
FLYBASE;FBgn0069433;G5A.	-0.68	1.8	2.8	0.097	0.53
FLYBASE;FBgn0003519;Stalker.	-0.46	4.9	2.7	0.1	0.53
FLYBASE;FBgn0003055;P-element.	-0.32	3.2	2.3	0.13	0.65
FLYBASE;FBgn0020425;Helena.	0.7	1.6	2.2	0.14	0.65
FLYBASE;FBgn0063447;accord.	-0.53	5.7	2.2	0.14	0.65
FLYBASE;FBgn0004082;Tirant.	-0.49	3.6	2	0.16	0.69
FLYBASE;FBgn0026065;Idefix.	-0.51	4.7	1.9	0.16	0.69
FLYBASE;FBgn0067384;gypsy7.	0.63	2.2	1.9	0.17	0.69
FLYBASE;FBgn0026416;INE-1.	-0.58	-0.81	1.8	0.17	0.69
FLYBASE;FBgn0063394;rooA.	0.41	5.4	1.8	0.18	0.69
FLYBASE;FBgn0001283;jockey.	0.33	6.5	1.7	0.19	0.73
FLYBASE;FBgn0041728;Rt1a.	0.96	-2	1.6	0.21	0.74
FLYBASE;FBgn0063507;G2.	0.63	1.1	1.6	0.21	0.74
FLYBASE;FBgn0063919;Max-element.	0.35	8	1.5	0.22	0.74
FLYBASE;FBgn0005773;Bari1.	-0.35	1.7	1.5	0.23	0.74
FLYBASE;FBgn0001181;HB.	-0.41	2.1	1.5	0.23	0.74
FLYBASE;FBgn0045970;Tabor.	0.47	3.3	1.3	0.25	0.79
FLYBASE;FBgn0067385;invader6.	0.51	1.6	1.3	0.26	0.8
FLYBASE;FBgn0067381;hopper2.	0.53	-0.51	1.1	0.29	0.85
FLYBASE;FBgn0014947;flea.	-0.27	7.2	1.1	0.3	0.85
FLYBASE;FBgn0003908;R1A1-element.	-0.36	5.1	1	0.31	0.85
FLYBASE;FBgn0063897;Stalker4.	-0.29	5.3	1	0.31	0.85
FLYBASE;FBgn0002949;NOF.	-0.42	0.65	0.97	0.33	0.85
FLYBASE;FBgn0063466;S2.	0.67	-0.68	0.9	0.34	0.85
FLYBASE;FBgn0067387;gypsy10.	-0.38	2.1	0.84	0.36	0.85
FLYBASE;FBgn0042682;Rt1b.	-0.3	6	0.83	0.36	0.85
FLYBASE;FBgn0000652;F-element.	0.41	5.3	0.83	0.36	0.85
FLYBASE;FBgn0001207;HMS-Beagle.	-0.24	5.8	0.8	0.37	0.85
FLYBASE;FBgn0061513;frogger.	-0.6	0.91	0.76	0.38	0.85
FLYBASE;FBgn0026410;Tc1.	-0.32	2.7	0.74	0.39	0.85
FLYBASE;FBgn0069340;Tc1-2.	-0.26	3	0.74	0.39	0.85
FLYBASE;FBgn0067383;gypsy8.	0.42	0.037	0.73	0.39	0.85
FLYBASE;FBgn0000638;FB.	-0.23	4.2	0.71	0.4	0.85
FLYBASE;FBgn0063402;looper1.	0.49	-0.71	0.7	0.4	0.85
FLYBASE;FBgn0040267;Transpac.	0.28	6.9	0.69	0.41	0.85
FLYBASE;FBgn0063425;jockey2.	-0.37	1	0.68	0.41	0.85
FLYBASE;FBgn0063401;mariner2.	-0.35	1.2	0.63	0.43	0.86
FLYBASE;FBgn0069343;TAHRE.	-0.2	4.5	0.61	0.44	0.86
FLYBASE;FBgn0063467;Rt1c.	0.39	0.12	0.59	0.44	0.86
FLYBASE;FBgn0063506;G3.	0.46	-0.53	0.58	0.45	0.86
FLYBASE;FBgn0063533;Doc3-element.	0.36	4.7	0.57	0.45	0.86
FLYBASE;FBgn0001210;hobo.	-0.25	3.4	0.54	0.46	0.87
FLYBASE;FBgn0063504;G5.	-0.33	2.7	0.51	0.48	0.89
FLYBASE;FBgn0063439;diver2.	0.34	3.4	0.48	0.49	0.89
FLYBASE;FBgn0001100;G-element.	0.42	0.85	0.47	0.5	0.89
FLYBASE;FBgn0067624;BS3.	-0.31	0.98	0.41	0.52	0.9
FLYBASE;FBgn0063431;gypsy6.	0.28	2.8	0.34	0.56	0.9
FLYBASE;FBgn0063917;McClintock.	0.26	1.4	0.32	0.57	0.9
FLYBASE;FBgn0005673;1360.	-0.16	4.7	0.31	0.58	0.9
FLYBASE;FBgn0063434;gypsy3.	0.31	2.3	0.31	0.58	0.9
FLYBASE;FBgn0063440;baggins.	0.28	3.8	0.31	0.58	0.9
FLYBASE;FBgn0022937;Circe.	0.24	1.8	0.3	0.59	0.9
FLYBASE;FBgn0004141;HeT-A.	-0.14	4.4	0.3	0.59	0.9
FLYBASE;FBgn0064134;Bari2.	-0.36	-0.0044	0.29	0.59	0.9
FLYBASE;FBgn0023131;ZAM.	0.3	-1.2	0.29	0.59	0.9
FLYBASE;FBgn0002697;mdg1.	0.16	4.7	0.29	0.59	0.9
FLYBASE;FBgn0044355;Quasimodo.	-0.2	5.3	0.29	0.59	0.9
FLYBASE;FBgn0063435;gypsy2.	0.24	2.9	0.26	0.61	0.92
FLYBASE;FBgn0063782;accord2.	-0.2	2.2	0.23	0.63	0.94
FLYBASE;FBgn0043969;diver.	-0.17	3.5	0.2	0.65	0.94
FLYBASE;FBgn0063430;invader1.	0.2	2.7	0.17	0.68	0.94
FLYBASE;FBgn0026443;Dyak\TART.	-0.14	5.8	0.15	0.7	0.94
FLYBASE;FBgn0001249;I-element.	-0.15	3.2	0.15	0.7	0.94
FLYBASE;FBgn0046110;Juan.	-0.12	3.3	0.15	0.7	0.94
FLYBASE;FBgn0062343;Dm88.	-0.19	2.1	0.14	0.71	0.94
FLYBASE;FBgn0061191;Tc3.	-0.19	0.46	0.14	0.71	0.94
FLYBASE;FBgn0067421;Fw2.	0.21	0.64	0.12	0.72	0.94
FLYBASE;FBgn0067420;Fw3.	-0.19	-1.5	0.12	0.73	0.94
FLYBASE;FBgn0063594;Cr1a.	-0.14	5.1	0.12	0.73	0.94
FLYBASE;FBgn0000481;Doc.	0.098	6.6	0.11	0.74	0.94
FLYBASE;FBgn0063372;transib1.	-0.22	0.0083	0.11	0.74	0.94
FLYBASE;FBgn0067382;gypsy9.	0.25	-1.4	0.11	0.74	0.94
FLYBASE;FBgn0067405;R1-2.	0.18	-0.24	0.081	0.78	0.96
FLYBASE;FBgn0015786;Porto1.	0.14	0.6	0.074	0.79	0.96
FLYBASE;FBgn0014967;hopper.	-0.11	2.1	0.07	0.79	0.96
FLYBASE;FBgn0010103;aurora-element.	-0.13	1.7	0.05	0.82	0.96
FLYBASE;FBgn0063534;Doc2-element.	0.096	4	0.048	0.83	0.96
FLYBASE;FBgn0063429;invader2.	0.09	3.4	0.044	0.83	0.96
FLYBASE;FBgn0063370;transib3.	0.074	1.9	0.039	0.84	0.96
FLYBASE;FBgn0015168;Dsim\ninja.	-0.093	2.2	0.03	0.86	0.96
FLYBASE;FBgn0063450;Tom1.	0.079	-0.37	0.026	0.87	0.96
FLYBASE;FBgn0043055;Ivk.	0.077	2.3	0.026	0.87	0.96
FLYBASE;FBgn0004905;S-element.	0.05	2.4	0.026	0.87	0.96
FLYBASE;FBgn0000155;roo.	-0.048	9.7	0.023	0.88	0.96
FLYBASE;FBgnnnnnnnn;HMS-Beagle2.	-0.061	4.3	0.023	0.88	0.96
FLYBASE;FBgn0000004;17.6.	-0.046	6.2	0.022	0.88	0.96
FLYBASE;FBgn0042231;X-element.	-0.061	4.2	0.021	0.88	0.96
FLYBASE;FBgn0069587;Doc4-element.	0.08	0.073	0.02	0.89	0.96
FLYBASE;FBgn0063371;transib2.	0.051	1.8	0.013	0.91	0.97
FLYBASE;FBgn0063433;gypsy4.	0.052	5.1	0.012	0.91	0.97
FLYBASE;FBgn0063428;invader3.	0.033	2.3	0.0061	0.94	0.98
FLYBASE;FBgn0015945;GATE.	-0.032	3.9	0.005	0.94	0.98
FLYBASE;FBgn0003122;pogo.	-0.019	4.1	0.0036	0.95	0.98
FLYBASE;FBgn0063455;Stalker2.	0.012	4	0.0017	0.97	0.98
FLYBASE;FBgn0003007;opus.	0.009	7.3	0.0012	0.97	0.98
FLYBASE;FBgn0063432;gypsy5.	-0.0094	0.79	0.00056	0.98	0.98
FLYBASE;FBgn0000005;297.	0.0067	6.6	0.00043	0.98	0.98

## Sheet: interaction_Gut
	logFC	logCPM	LR	PValue	adj.PValue
FLYBASE;FBgn0000004;17.6.	-0.34	6.2	2.5	0.11	0.49
FLYBASE;FBgn0000005;297.	-0.3	6.6	1.7	0.2	0.63
FLYBASE;FBgn0000006;412.	-0.12	5	0.38	0.54	0.87
FLYBASE;FBgn0000007;1731.	0.12	3.8	0.14	0.7	0.97
FLYBASE;FBgn0000155;roo.	-0.48	9.7	4.4	0.035	0.31
FLYBASE;FBgn0000199;blood.	-0.32	6.2	2.9	0.087	0.48
FLYBASE;FBgn0000224;BS.	-0.24	3.8	1.2	0.27	0.73
FLYBASE;FBgn0000349;copia.	-0.42	13	2.9	0.089	0.48
FLYBASE;FBgn0000481;Doc.	-0.16	6.6	0.56	0.45	0.83
FLYBASE;FBgn0000638;FB.	-0.43	4.2	4.9	0.027	0.31
FLYBASE;FBgn0000652;F-element.	-0.063	5.3	0.039	0.84	0.97
FLYBASE;FBgn0001100;G-element.	0.78	0.85	3.8	0.053	0.35
FLYBASE;FBgn0001167;gypsy.	0.18	8.5	0.75	0.39	0.78
FLYBASE;FBgn0001181;HB.	-0.17	2.1	0.53	0.47	0.83
FLYBASE;FBgn0001207;HMS-Beagle.	-0.44	5.8	5.5	0.019	0.31
FLYBASE;FBgn0001210;hobo.	-0.053	3.4	0.05	0.82	0.97
FLYBASE;FBgn0001249;I-element.	-0.41	3.2	2.5	0.12	0.49
FLYBASE;FBgn0001283;jockey.	-0.075	6.5	0.18	0.67	0.96
FLYBASE;FBgn0002697;mdg1.	-0.44	4.7	4.4	0.036	0.31
FLYBASE;FBgn0002698;mdg3.	-0.026	4.7	0.0096	0.92	0.98
FLYBASE;FBgn0002745;micropia.	0.59	5.4	8.6	0.0033	0.18
FLYBASE;FBgn0002949;NOF.	-0.24	0.65	0.63	0.43	0.82
FLYBASE;FBgn0003007;opus.	-0.36	7.3	3.9	0.049	0.35
FLYBASE;FBgn0003055;P-element.	-0.23	3.2	2.5	0.11	0.49
FLYBASE;FBgn0003122;pogo.	-0.48	4.1	4.4	0.035	0.31
FLYBASE;FBgn0003490;springer.	0.65	6.9	9.2	0.0024	0.18
FLYBASE;FBgn0003519;Stalker.	-0.044	4.9	0.048	0.83	0.97
FLYBASE;FBgn0003908;R1A1-element.	0.18	5.1	0.5	0.48	0.84
FLYBASE;FBgn0003909;R2-element.	-0.051	8.5	0.053	0.82	0.97
FLYBASE;FBgn0004082;Tirant.	0.11	3.6	0.18	0.67	0.96
FLYBASE;FBgn0004141;HeT-A.	0.18	4.4	1	0.31	0.75
FLYBASE;FBgn0004905;S-element.	-0.35	2.4	2.8	0.094	0.48
FLYBASE;FBgn0005384;3S18.	-0.31	6.6	3.3	0.068	0.4
FLYBASE;FBgn0005673;1360.	-0.31	4.7	2.2	0.14	0.51
FLYBASE;FBgn0005773;Bari1.	-0.38	1.7	3.7	0.054	0.35
FLYBASE;FBgn0010103;aurora-element.	0.079	1.7	0.032	0.86	0.97
FLYBASE;FBgn0010302;Burdock.	-0.18	6.1	0.39	0.53	0.87
FLYBASE;FBgn0014947;flea.	-0.5	7.2	7.6	0.006	0.18
FLYBASE;FBgn0014967;hopper.	-0.35	2.1	1.5	0.22	0.67
FLYBASE;FBgn0015168;Dsim\ninja.	-0.093	2.2	0.055	0.81	0.97
FLYBASE;FBgn0015786;Porto1.	-0.37	0.6	1.2	0.28	0.73
FLYBASE;FBgn0015945;GATE.	-0.083	3.9	0.069	0.79	0.97
FLYBASE;FBgn0020425;Helena.	-0.59	1.6	2.5	0.11	0.49
FLYBASE;FBgn0022937;Circe.	-0.54	1.8	3.3	0.068	0.4
FLYBASE;FBgn0023131;ZAM.	-0.87	-1.2	5.1	0.024	0.31
FLYBASE;FBgn0026065;Idefix.	-0.16	4.7	0.37	0.54	0.87
FLYBASE;FBgn0026410;Tc1.	-0.26	2.7	1	0.31	0.75
FLYBASE;FBgn0026416;INE-1.	-0.62	-0.81	4.4	0.037	0.31
FLYBASE;FBgn0026443;Dyak\TART.	-0.019	5.8	0.0061	0.94	0.98
FLYBASE;FBgn0040267;Transpac.	-0.52	6.9	4.8	0.028	0.31
FLYBASE;FBgn0041728;Rt1a.	-0.69	-2	1.9	0.17	0.56
FLYBASE;FBgn0042231;X-element.	0.034	4.2	0.014	0.91	0.98
FLYBASE;FBgn0042682;Rt1b.	0.2	6	0.71	0.4	0.78
FLYBASE;FBgn0043055;Ivk.	0.077	2.3	0.053	0.82	0.97
FLYBASE;FBgn0043969;diver.	-0.16	3.5	0.37	0.54	0.87
FLYBASE;FBgn0044355;Quasimodo.	-0.33	5.3	1.6	0.21	0.65
FLYBASE;FBgn0045970;Tabor.	-0.26	3.3	0.88	0.35	0.77
FLYBASE;FBgn0046110;Juan.	-0.25	3.3	1.2	0.28	0.73
FLYBASE;FBgn0061191;Tc3.	-0.37	0.46	1.1	0.29	0.73
FLYBASE;FBgn0061485;rover.	0.14	3	0.41	0.52	0.87
FLYBASE;FBgn0061513;frogger.	0.15	0.91	0.12	0.73	0.97
FLYBASE;FBgn0062343;Dm88.	0.28	2.1	0.57	0.45	0.83
FLYBASE;FBgn0063369;transib4.	-0.88	0.36	7.7	0.0056	0.18
FLYBASE;FBgn0063370;transib3.	-0.15	1.9	0.37	0.54	0.87
FLYBASE;FBgn0063371;transib2.	-0.36	1.8	1.3	0.25	0.72
FLYBASE;FBgn0063372;transib1.	-0.58	0.0083	1.3	0.25	0.72
FLYBASE;FBgn0063394;rooA.	0.1	5.4	0.24	0.62	0.95
FLYBASE;FBgn0063401;mariner2.	-0.15	1.2	0.26	0.61	0.94
FLYBASE;FBgn0063402;looper1.	-0.41	-0.71	1.2	0.27	0.73
FLYBASE;FBgn0063425;jockey2.	-0.29	1	0.9	0.34	0.77
FLYBASE;FBgn0063427;invader4.	-0.028	3.4	0.0068	0.93	0.98
FLYBASE;FBgn0063428;invader3.	-0.23	2.3	0.6	0.44	0.83
FLYBASE;FBgn0063429;invader2.	-0.42	3.4	2	0.16	0.56
FLYBASE;FBgn0063430;invader1.	-0.028	2.7	0.0063	0.94	0.98
FLYBASE;FBgn0063431;gypsy6.	-0.028	2.8	0.0066	0.94	0.98
FLYBASE;FBgn0063432;gypsy5.	-0.16	0.79	0.32	0.57	0.9
FLYBASE;FBgn0063433;gypsy4.	-0.15	5.1	0.19	0.66	0.96
FLYBASE;FBgn0063434;gypsy3.	-0.04	2.3	0.011	0.92	0.98
FLYBASE;FBgn0063435;gypsy2.	0.055	2.9	0.028	0.87	0.97
FLYBASE;FBgn0063436;gtwin.	-0.33	5.3	2.3	0.13	0.5
FLYBASE;FBgn0063439;diver2.	-0.059	3.4	0.029	0.87	0.97
FLYBASE;FBgn0063440;baggins.	-0.013	3.8	0.0014	0.97	0.99
FLYBASE;FBgn0063447;accord.	-0.62	5.7	6.1	0.014	0.27
FLYBASE;FBgn0063450;Tom1.	-0.081	-0.37	0.086	0.77	0.97
FLYBASE;FBgn0063455;Stalker2.	0.18	4	0.82	0.36	0.77
FLYBASE;FBgn0063466;S2.	-0.17	-0.68	0.17	0.68	0.96
FLYBASE;FBgn0063467;Rt1c.	0.072	0.12	0.036	0.85	0.97
FLYBASE;FBgn0063503;G6.	0.91	2.5	6.3	0.012	0.27
FLYBASE;FBgn0063504;G5.	-0.018	2.7	0.0032	0.95	0.99
FLYBASE;FBgn0063505;G4.	-0.42	1.3	2.4	0.12	0.49
FLYBASE;FBgn0063506;G3.	-0.015	-0.53	0.0012	0.97	0.99
FLYBASE;FBgn0063507;G2.	0.0028	1.1	7.1e-05	0.99	0.99
FLYBASE;FBgn0063533;Doc3-element.	-0.14	4.7	0.18	0.67	0.96
FLYBASE;FBgn0063534;Doc2-element.	-0.059	4	0.037	0.85	0.97
FLYBASE;FBgn0063594;Cr1a.	-0.27	5.1	0.9	0.34	0.77
FLYBASE;FBgn0063782;accord2.	0.062	2.2	0.045	0.83	0.97
FLYBASE;FBgn0063897;Stalker4.	-0.15	5.3	0.53	0.47	0.83
FLYBASE;FBgn0063917;McClintock.	-0.3	1.4	0.8	0.37	0.77
FLYBASE;FBgn0063919;Max-element.	-0.038	8	0.036	0.85	0.97
FLYBASE;FBgn0064134;Bari2.	-0.36	-0.0044	0.76	0.38	0.78
FLYBASE;FBgn0067381;hopper2.	-0.064	-0.51	0.025	0.87	0.97
FLYBASE;FBgn0067382;gypsy9.	-0.13	-1.4	0.077	0.78	0.97
FLYBASE;FBgn0067383;gypsy8.	0.092	0.037	0.085	0.77	0.97
FLYBASE;FBgn0067384;gypsy7.	-0.33	2.2	0.91	0.34	0.77
FLYBASE;FBgn0067385;gypsy12.	0.094	1.9	0.18	0.67	0.96
FLYBASE;FBgn0067385;invader6.	-0.32	1.6	0.88	0.35	0.77
FLYBASE;FBgn0067386;gypsy11.	-0.61	-0.44	1.7	0.2	0.63
FLYBASE;FBgn0067387;gypsy10.	-0.26	2.1	0.81	0.37	0.77
FLYBASE;FBgn0067405;R1-2.	0.57	-0.24	2	0.16	0.56
FLYBASE;FBgn0067420;Fw3.	-0.56	-1.5	1.9	0.16	0.56
FLYBASE;FBgn0067421;Fw2.	0.069	0.64	0.026	0.87	0.97
FLYBASE;FBgn0067624;BS3.	-0.11	0.98	0.11	0.73	0.97
FLYBASE;FBgn0069340;Tc1-2.	-0.44	3	4	0.046	0.35
FLYBASE;FBgn0069343;TAHRE.	0.11	4.5	0.36	0.55	0.87
FLYBASE;FBgn0069433;G5A.	-0.46	1.8	2.7	0.1	0.49
FLYBASE;FBgn0069587;Doc4-element.	-0.0059	0.073	0.00025	0.99	0.99
FLYBASE;FBgnnnnnnnn;HMS-Beagle2.	-0.24	4.3	0.71	0.4	0.78

## Sheet: DPPvsWTP_Gut
	logFC	logCPM	LR	PValue	adj.PValue	interaction_adj.PValue
FLYBASE;FBgn0000349;copia.	-0.56	13	2.6	0.11	0.51	0.48
FLYBASE;FBgn0000155;roo.	-0.34	9.7	1.2	0.28	0.78	0.31
FLYBASE;FBgn0001167;gypsy.	0.73	8.5	6	0.015	0.15	0.78
FLYBASE;FBgn0003909;R2-element.	-1.2	8.5	15	0.00011	0.0041	0.97
FLYBASE;FBgn0063919;Max-element.	0.49	8	3	0.082	0.44	0.97
FLYBASE;FBgn0003007;opus.	-0.7	7.3	7.3	0.0068	0.098	0.35
FLYBASE;FBgn0014947;flea.	-0.82	7.2	10	0.0015	0.035	0.18
FLYBASE;FBgn0003490;springer.	0.73	6.9	5.8	0.016	0.15	0.18
FLYBASE;FBgn0040267;Transpac.	-0.32	6.9	0.89	0.34	0.81	0.31
FLYBASE;FBgn0000005;297.	0.22	6.6	0.46	0.5	0.92	0.63
FLYBASE;FBgn0000481;Doc.	0.14	6.6	0.24	0.63	0.92	0.83
FLYBASE;FBgn0005384;3S18.	0.43	6.6	3.1	0.076	0.42	0.4
FLYBASE;FBgn0001283;jockey.	0.67	6.5	7.1	0.0075	0.098	0.96
FLYBASE;FBgn0000004;17.6.	-0.25	6.2	0.65	0.42	0.87	0.49
FLYBASE;FBgn0000199;blood.	-1.1	6.2	18	2.5e-05	0.0029	0.48
FLYBASE;FBgn0010302;Burdock.	-0.6	6.1	2.3	0.13	0.56	0.87
FLYBASE;FBgn0042682;Rt1b.	0.21	6	0.39	0.53	0.92	0.78
FLYBASE;FBgn0001207;HMS-Beagle.	-0.28	5.8	1.1	0.29	0.78	0.31
FLYBASE;FBgn0026443;Dyak\TART.	-0.42	5.8	1.5	0.23	0.74	0.98
FLYBASE;FBgn0063447;accord.	-0.79	5.7	4.9	0.027	0.21	0.27
FLYBASE;FBgn0002745;micropia.	0.097	5.4	0.12	0.73	0.92	0.18
FLYBASE;FBgn0063394;rooA.	0.54	5.4	3.2	0.073	0.42	0.95
FLYBASE;FBgn0000652;F-element.	0.027	5.3	0.0037	0.95	0.98	0.97
FLYBASE;FBgn0044355;Quasimodo.	-0.52	5.3	1.9	0.16	0.62	0.65
FLYBASE;FBgn0063436;gtwin.	-1.1	5.3	12	0.00045	0.013	0.5
FLYBASE;FBgn0063897;Stalker4.	-0.22	5.3	0.59	0.44	0.89	0.83
FLYBASE;FBgn0003908;R1A1-element.	0.14	5.1	0.16	0.69	0.92	0.84
FLYBASE;FBgn0063433;gypsy4.	-0.24	5.1	0.24	0.62	0.92	0.96
FLYBASE;FBgn0063594;Cr1a.	-0.34	5.1	0.69	0.41	0.87	0.77
FLYBASE;FBgn0000006;412.	-0.28	5	1	0.32	0.79	0.87
FLYBASE;FBgn0003519;Stalker.	-0.094	4.9	0.11	0.74	0.92	0.97
FLYBASE;FBgn0002697;mdg1.	-0.3	4.7	1	0.31	0.78	0.31
FLYBASE;FBgn0002698;mdg3.	-0.14	4.7	0.13	0.72	0.92	0.98
FLYBASE;FBgn0005673;1360.	-0.43	4.7	2.1	0.15	0.59	0.51
FLYBASE;FBgn0026065;Idefix.	-0.09	4.7	0.061	0.8	0.92	0.87
FLYBASE;FBgn0063533;Doc3-element.	-0.15	4.7	0.1	0.75	0.92	0.96
FLYBASE;FBgn0069343;TAHRE.	-0.16	4.5	0.4	0.53	0.92	0.87
FLYBASE;FBgn0004141;HeT-A.	-0.08	4.4	0.1	0.75	0.92	0.75
FLYBASE;FBgnnnnnnnn;HMS-Beagle2.	-0.96	4.3	5.7	0.017	0.15	0.78
FLYBASE;FBgn0000638;FB.	-0.51	4.2	3.5	0.063	0.39	0.31
FLYBASE;FBgn0042231;X-element.	0.25	4.2	0.37	0.54	0.92	0.98
FLYBASE;FBgn0003122;pogo.	-0.92	4.1	8.1	0.0044	0.087	0.31
FLYBASE;FBgn0063455;Stalker2.	1.1	4	15	8.6e-05	0.0041	0.77
FLYBASE;FBgn0063534;Doc2-element.	-0.17	4	0.15	0.7	0.92	0.97
FLYBASE;FBgn0015945;GATE.	0.18	3.9	0.17	0.68	0.92	0.97
FLYBASE;FBgn0000007;1731.	0.92	3.8	4.2	0.04	0.28	0.97
FLYBASE;FBgn0000224;BS.	0.79	3.8	6.6	0.01	0.12	0.73
FLYBASE;FBgn0063440;baggins.	0.16	3.8	0.095	0.76	0.92	0.99
FLYBASE;FBgn0004082;Tirant.	0.16	3.6	0.22	0.64	0.92	0.96
FLYBASE;FBgn0043969;diver.	-0.36	3.5	0.89	0.35	0.81	0.87
FLYBASE;FBgn0001210;hobo.	0.045	3.4	0.018	0.89	0.94	0.97
FLYBASE;FBgn0063427;invader4.	-0.16	3.4	0.11	0.74	0.92	0.98
FLYBASE;FBgn0063429;invader2.	0.069	3.4	0.027	0.87	0.93	0.56
FLYBASE;FBgn0063439;diver2.	0.04	3.4	0.0065	0.94	0.97	0.97
FLYBASE;FBgn0045970;Tabor.	-0.088	3.3	0.049	0.82	0.93	0.77
FLYBASE;FBgn0046110;Juan.	0.49	3.3	2.3	0.13	0.56	0.73
FLYBASE;FBgn0001249;I-element.	0.14	3.2	0.14	0.71	0.92	0.49
FLYBASE;FBgn0003055;P-element.	-0.25	3.2	1.5	0.23	0.74	0.49
FLYBASE;FBgn0061485;rover.	0.39	3	1.6	0.21	0.72	0.87
FLYBASE;FBgn0069340;Tc1-2.	-0.42	3	1.8	0.18	0.65	0.35
FLYBASE;FBgn0063435;gypsy2.	0.087	2.9	0.034	0.85	0.93	0.97
FLYBASE;FBgn0063431;gypsy6.	-0.26	2.8	0.3	0.58	0.92	0.98
FLYBASE;FBgn0026410;Tc1.	-0.33	2.7	0.83	0.36	0.82	0.75
FLYBASE;FBgn0063430;invader1.	0.13	2.7	0.067	0.8	0.92	0.98
FLYBASE;FBgn0063504;G5.	-0.094	2.7	0.042	0.84	0.93	0.99
FLYBASE;FBgn0063503;G6.	1.4	2.5	7.8	0.0053	0.088	0.27
FLYBASE;FBgn0004905;S-element.	-0.32	2.4	1.2	0.28	0.78	0.48
FLYBASE;FBgn0043055;Ivk.	0.016	2.3	0.0011	0.97	0.98	0.97
FLYBASE;FBgn0063428;invader3.	-0.07	2.3	0.027	0.87	0.93	0.83
FLYBASE;FBgn0063434;gypsy3.	-0.14	2.3	0.065	0.8	0.92	0.98
FLYBASE;FBgn0015168;Dsim\ninja.	0.34	2.2	0.36	0.55	0.92	0.97
FLYBASE;FBgn0063782;accord2.	-0.12	2.2	0.082	0.78	0.92	0.97
FLYBASE;FBgn0067384;gypsy7.	0.26	2.2	0.29	0.59	0.92	0.77
FLYBASE;FBgn0001181;HB.	-0.11	2.1	0.1	0.75	0.92	0.83
FLYBASE;FBgn0014967;hopper.	-0.075	2.1	0.034	0.85	0.93	0.67
FLYBASE;FBgn0062343;Dm88.	0.28	2.1	0.29	0.59	0.92	0.83
FLYBASE;FBgn0067387;gypsy10.	-0.21	2.1	0.27	0.6	0.92	0.77
FLYBASE;FBgn0063370;transib3.	-0.3	1.9	0.7	0.4	0.87	0.87
FLYBASE;FBgn0067385;gypsy12.	0.45	1.9	2.1	0.15	0.59	0.96
FLYBASE;FBgn0022937;Circe.	-0.23	1.8	0.3	0.58	0.92	0.4
FLYBASE;FBgn0063371;transib2.	-0.31	1.8	0.49	0.49	0.92	0.72
FLYBASE;FBgn0069433;G5A.	-0.58	1.8	2.1	0.15	0.59	0.49
FLYBASE;FBgn0005773;Bari1.	-0.42	1.7	2.3	0.13	0.56	0.35
FLYBASE;FBgn0010103;aurora-element.	0.42	1.7	0.43	0.51	0.92	0.97
FLYBASE;FBgn0020425;Helena.	0.0074	1.6	0.0002	0.99	0.99	0.49
FLYBASE;FBgn0067385;invader6.	0.54	1.6	1.3	0.26	0.78	0.77
FLYBASE;FBgn0063917;McClintock.	-0.11	1.4	0.057	0.81	0.92	0.77
FLYBASE;FBgn0063505;G4.	-0.42	1.3	1.2	0.28	0.78	0.49
FLYBASE;FBgn0063401;mariner2.	0.018	1.2	0.0019	0.96	0.98	0.94
FLYBASE;FBgn0063507;G2.	0.39	1.1	0.64	0.42	0.87	0.99
FLYBASE;FBgn0063425;jockey2.	-0.37	1	0.76	0.38	0.84	0.77
FLYBASE;FBgn0067624;BS3.	0.12	0.98	0.065	0.8	0.92	0.97
FLYBASE;FBgn0061513;frogger.	-0.39	0.91	0.42	0.52	0.92	0.97
FLYBASE;FBgn0001100;G-element.	1.3	0.85	5.6	0.018	0.15	0.35
FLYBASE;FBgn0063432;gypsy5.	-0.16	0.79	0.15	0.7	0.92	0.9
FLYBASE;FBgn0002949;NOF.	-0.23	0.65	0.28	0.59	0.92	0.82
FLYBASE;FBgn0067421;Fw2.	-0.096	0.64	0.025	0.87	0.93	0.97
FLYBASE;FBgn0015786;Porto1.	-0.22	0.6	0.21	0.64	0.92	0.73
FLYBASE;FBgn0061191;Tc3.	-0.49	0.46	1.1	0.3	0.78	0.73
FLYBASE;FBgn0063369;transib4.	-0.72	0.36	2.7	0.1	0.51	0.18
FLYBASE;FBgn0063467;Rt1c.	0.29	0.12	0.29	0.59	0.92	0.97
FLYBASE;FBgn0069587;Doc4-element.	-0.18	0.073	0.11	0.74	0.92	0.99
FLYBASE;FBgn0067383;gypsy8.	0.53	0.037	1.4	0.24	0.75	0.97
FLYBASE;FBgn0063372;transib1.	-0.74	0.0083	0.98	0.32	0.79	0.72
FLYBASE;FBgn0064134;Bari2.	-0.17	-0.0044	0.087	0.77	0.92	0.78
FLYBASE;FBgn0067405;R1-2.	0.61	-0.24	1.1	0.29	0.78	0.56
FLYBASE;FBgn0063450;Tom1.	-0.49	-0.37	1.6	0.2	0.71	0.97
FLYBASE;FBgn0067386;gypsy11.	-0.71	-0.44	1.2	0.27	0.78	0.63
FLYBASE;FBgn0067381;hopper2.	0.27	-0.51	0.22	0.64	0.92	0.97
FLYBASE;FBgn0063506;G3.	-0.076	-0.53	0.017	0.9	0.94	0.99
FLYBASE;FBgn0063466;S2.	0.25	-0.68	0.17	0.68	0.92	0.96
FLYBASE;FBgn0063402;looper1.	-0.4	-0.71	0.52	0.47	0.92	0.73
FLYBASE;FBgn0026416;INE-1.	-0.26	-0.81	0.43	0.51	0.92	0.31
FLYBASE;FBgn0023131;ZAM.	-1.1	-1.2	4.3	0.039	0.28	0.31
FLYBASE;FBgn0067382;gypsy9.	-0.2	-1.4	0.086	0.77	0.92	0.97
FLYBASE;FBgn0067420;Fw3.	-1.1	-1.5	3.9	0.049	0.32	0.56
FLYBASE;FBgn0041728;Rt1a.	-0.61	-2	0.87	0.35	0.81	0.56

## Sheet: DPPvsDPM_Gut
	logFC	logCPM	LR	PValue	adj.PValue
FLYBASE;FBgn0063503;G6.	3.8	2.5	45	2.1e-11	2.4e-09
FLYBASE;FBgn0001100;G-element.	4.1	0.85	42	8.1e-11	4.7e-09
FLYBASE;FBgn0003490;springer.	1.9	6.9	36	2.1e-09	8e-08
FLYBASE;FBgn0005384;3S18.	-1.3	6.6	28	1.1e-07	3.1e-06
FLYBASE;FBgn0001207;HMS-Beagle.	-0.79	5.8	8.8	0.0031	0.072
FLYBASE;FBgn0003007;opus.	-0.72	7.3	7.7	0.0056	0.11
FLYBASE;FBgn0014947;flea.	-0.67	7.2	6.8	0.0092	0.14
FLYBASE;FBgn0003122;pogo.	-0.84	4.1	6.7	0.0096	0.14
FLYBASE;FBgn0063436;gtwin.	-0.68	5.3	4.5	0.033	0.43
FLYBASE;FBgn0069433;G5A.	-0.73	1.8	3.3	0.071	0.74
FLYBASE;FBgn0063402;looper1.	-0.94	-0.71	3	0.083	0.74
FLYBASE;FBgn0023131;ZAM.	-0.96	-1.2	2.9	0.087	0.74
FLYBASE;FBgn0063466;S2.	-0.91	-0.68	2.8	0.091	0.74
FLYBASE;FBgn0022937;Circe.	-0.7	1.8	2.8	0.093	0.74
FLYBASE;FBgn0002697;mdg1.	-0.49	4.7	2.8	0.095	0.74
FLYBASE;FBgn0063432;gypsy5.	-0.67	0.79	2.6	0.11	0.77
FLYBASE;FBgn0067420;Fw3.	-0.93	-1.5	2.4	0.12	0.79
FLYBASE;FBgn0063917;McClintock.	-0.68	1.4	2.1	0.15	0.79
FLYBASE;FBgn0000004;17.6.	-0.44	6.2	2.1	0.15	0.79
FLYBASE;FBgn0063372;transib1.	-1	0.0083	2	0.16	0.79
FLYBASE;FBgn0063369;transib4.	-0.61	0.36	1.9	0.17	0.79
FLYBASE;FBgn0000199;blood.	-0.36	6.2	1.8	0.18	0.79
FLYBASE;FBgn0063425;jockey2.	-0.57	1	1.8	0.18	0.79
FLYBASE;FBgn0063505;G4.	-0.51	1.3	1.7	0.19	0.79
FLYBASE;FBgn0004905;S-element.	-0.38	2.4	1.6	0.2	0.79
FLYBASE;FBgn0014967;hopper.	-0.5	2.1	1.6	0.21	0.79
FLYBASE;FBgn0069340;Tc1-2.	-0.38	3	1.5	0.21	0.79
FLYBASE;FBgn0063401;mariner2.	-0.51	1.2	1.5	0.22	0.79
FLYBASE;FBgn0044355;Quasimodo.	-0.45	5.3	1.5	0.23	0.79
FLYBASE;FBgn0063427;invader4.	-0.58	3.4	1.5	0.23	0.79
FLYBASE;FBgn0000005;297.	-0.39	6.6	1.4	0.23	0.79
FLYBASE;FBgn0005773;Bari1.	-0.33	1.7	1.4	0.23	0.79
FLYBASE;FBgn0001167;gypsy.	0.35	8.5	1.3	0.25	0.79
FLYBASE;FBgn0063428;invader3.	-0.48	2.3	1.3	0.25	0.79
FLYBASE;FBgn0026410;Tc1.	-0.41	2.7	1.3	0.25	0.79
FLYBASE;FBgn0067381;hopper2.	-0.62	-0.51	1.3	0.25	0.79
FLYBASE;FBgn0062343;Dm88.	0.6	2.1	1.3	0.26	0.79
FLYBASE;FBgn0020425;Helena.	-0.58	1.6	1.3	0.26	0.79
FLYBASE;FBgn0015786;Porto1.	-0.53	0.6	1.2	0.27	0.79
FLYBASE;FBgn0067384;gypsy7.	-0.53	2.2	1.2	0.27	0.79
FLYBASE;FBgn0063455;Stalker2.	-0.31	4	1.2	0.28	0.8
FLYBASE;FBgn0010302;Burdock.	-0.42	6.1	1.1	0.29	0.81
FLYBASE;FBgn0045970;Tabor.	-0.4	3.3	1	0.32	0.84
FLYBASE;FBgn0001249;I-element.	0.35	3.2	0.92	0.34	0.84
FLYBASE;FBgn0005673;1360.	-0.28	4.7	0.92	0.34	0.84
FLYBASE;FBgn0063594;Cr1a.	-0.38	5.1	0.88	0.35	0.84
FLYBASE;FBgn0003055;P-element.	-0.19	3.2	0.85	0.36	0.84
FLYBASE;FBgn0063370;transib3.	-0.32	1.9	0.81	0.37	0.84
FLYBASE;FBgn0063440;baggins.	-0.45	3.8	0.8	0.37	0.84
FLYBASE;FBgn0063534;Doc2-element.	-0.38	4	0.79	0.37	0.84
FLYBASE;FBgn0004082;Tirant.	-0.31	3.6	0.77	0.38	0.84
FLYBASE;FBgn0000481;Doc.	-0.25	6.6	0.75	0.39	0.84
FLYBASE;FBgn0042231;X-element.	-0.35	4.2	0.73	0.39	0.84
FLYBASE;FBgnnnnnnnn;HMS-Beagle2.	-0.33	4.3	0.7	0.4	0.84
FLYBASE;FBgn0000349;copia.	-0.28	13	0.67	0.41	0.84
FLYBASE;FBgn0063431;gypsy6.	-0.39	2.8	0.66	0.42	0.84
FLYBASE;FBgn0000224;BS.	-0.25	3.8	0.66	0.42	0.84
FLYBASE;FBgn0063533;Doc3-element.	-0.37	4.7	0.61	0.44	0.84
FLYBASE;FBgn0026443;Dyak\TART.	-0.26	5.8	0.58	0.45	0.84
FLYBASE;FBgn0067624;BS3.	-0.35	0.98	0.55	0.46	0.84
FLYBASE;FBgn0015945;GATE.	-0.33	3.9	0.55	0.46	0.84
FLYBASE;FBgn0046110;Juan.	-0.23	3.3	0.54	0.46	0.84
FLYBASE;FBgn0040267;Transpac.	-0.25	6.9	0.54	0.46	0.84
FLYBASE;FBgn0003909;R2-element.	-0.23	8.5	0.53	0.47	0.84
FLYBASE;FBgn0026416;INE-1.	-0.29	-0.81	0.53	0.47	0.84
FLYBASE;FBgn0000007;1731.	0.31	3.8	0.5	0.48	0.84
FLYBASE;FBgn0004141;HeT-A.	0.17	4.4	0.45	0.5	0.84
FLYBASE;FBgn0063504;G5.	-0.3	2.7	0.44	0.51	0.84
FLYBASE;FBgn0001283;jockey.	-0.16	6.5	0.42	0.52	0.84
FLYBASE;FBgn0000638;FB.	0.18	4.2	0.41	0.52	0.84
FLYBASE;FBgn0063429;invader2.	-0.26	3.4	0.4	0.53	0.84
FLYBASE;FBgn0063371;transib2.	-0.27	1.8	0.38	0.54	0.84
FLYBASE;FBgn0063433;gypsy4.	-0.29	5.1	0.37	0.55	0.84
FLYBASE;FBgn0015168;Dsim\ninja.	-0.34	2.2	0.36	0.55	0.84
FLYBASE;FBgn0001181;HB.	-0.2	2.1	0.36	0.55	0.84
FLYBASE;FBgn0003519;Stalker.	-0.16	4.9	0.34	0.56	0.84
FLYBASE;FBgn0026065;Idefix.	-0.21	4.7	0.33	0.57	0.84
FLYBASE;FBgn0000155;roo.	-0.18	9.7	0.32	0.57	0.84
FLYBASE;FBgn0063439;diver2.	-0.28	3.4	0.32	0.57	0.84
FLYBASE;FBgn0010103;aurora-element.	-0.34	1.7	0.29	0.59	0.86
FLYBASE;FBgn0063507;G2.	-0.25	1.1	0.28	0.6	0.87
FLYBASE;FBgn0042682;Rt1b.	0.17	6	0.25	0.62	0.87
FLYBASE;FBgn0002745;micropia.	-0.14	5.4	0.23	0.63	0.87
FLYBASE;FBgn0063435;gypsy2.	-0.22	2.9	0.23	0.63	0.87
FLYBASE;FBgn0043969;diver.	-0.18	3.5	0.22	0.64	0.87
FLYBASE;FBgn0063447;accord.	-0.16	5.7	0.21	0.65	0.87
FLYBASE;FBgn0067405;R1-2.	0.26	-0.24	0.21	0.65	0.87
FLYBASE;FBgn0067385;invader6.	-0.19	1.6	0.17	0.68	0.91
FLYBASE;FBgn0063394;rooA.	0.12	5.4	0.15	0.69	0.91
FLYBASE;FBgn0064134;Bari2.	-0.22	-0.0044	0.14	0.7	0.91
FLYBASE;FBgn0069343;TAHRE.	0.093	4.5	0.14	0.71	0.91
FLYBASE;FBgn0063506;G3.	-0.19	-0.53	0.11	0.74	0.91
FLYBASE;FBgn0067383;gypsy8.	-0.14	0.037	0.1	0.75	0.91
FLYBASE;FBgn0061191;Tc3.	-0.15	0.46	0.097	0.75	0.91
FLYBASE;FBgn0000652;F-element.	-0.14	5.3	0.095	0.76	0.91
FLYBASE;FBgn0063430;invader1.	-0.14	2.7	0.082	0.77	0.91
FLYBASE;FBgn0043055;Ivk.	-0.13	2.3	0.072	0.79	0.91
FLYBASE;FBgn0067385;gypsy12.	0.081	1.9	0.071	0.79	0.91
FLYBASE;FBgn0063782;accord2.	0.11	2.2	0.067	0.8	0.91
FLYBASE;FBgn0069587;Doc4-element.	-0.14	0.073	0.067	0.8	0.91
FLYBASE;FBgn0063919;Max-element.	-0.072	8	0.064	0.8	0.91
FLYBASE;FBgn0063467;Rt1c.	-0.13	0.12	0.063	0.8	0.91
FLYBASE;FBgn0001210;hobo.	-0.084	3.4	0.062	0.8	0.91
FLYBASE;FBgn0067386;gypsy11.	-0.15	-0.44	0.05	0.82	0.92
FLYBASE;FBgn0067387;gypsy10.	-0.09	2.1	0.049	0.82	0.92
FLYBASE;FBgn0061513;frogger.	0.13	0.91	0.044	0.83	0.92
FLYBASE;FBgn0002949;NOF.	0.082	0.65	0.036	0.85	0.92
FLYBASE;FBgn0000006;412.	0.05	5	0.031	0.86	0.92
FLYBASE;FBgn0063450;Tom1.	0.067	-0.37	0.028	0.87	0.92
FLYBASE;FBgn0002698;mdg3.	0.062	4.7	0.027	0.87	0.92
FLYBASE;FBgn0063897;Stalker4.	-0.045	5.3	0.025	0.88	0.92
FLYBASE;FBgn0041728;Rt1a.	-0.059	-2	0.0073	0.93	0.95
FLYBASE;FBgn0003908;R1A1-element.	-0.028	5.1	0.0065	0.94	0.95
FLYBASE;FBgn0067382;gypsy9.	0.054	-1.4	0.0063	0.94	0.95
FLYBASE;FBgn0067421;Fw2.	-0.048	0.64	0.0063	0.94	0.95
FLYBASE;FBgn0063434;gypsy3.	0.033	2.3	0.0036	0.95	0.96
FLYBASE;FBgn0061485;rover.	-0.014	3	0.0022	0.96	0.96

## Sheet: WTPvsWTM_Gut
	logFC	logCPM	LR	PValue	adj.PValue
FLYBASE;FBgn0002745;micropia.	-1.3	5.4	21	3.9e-06	0.00045
FLYBASE;FBgn0001100;G-element.	2.5	0.85	18	2e-05	0.0012
FLYBASE;FBgn0000638;FB.	1	4.2	14	0.00018	0.0056
FLYBASE;FBgn0063503;G6.	2	2.5	14	0.00019	0.0056
FLYBASE;FBgn0001249;I-element.	1.2	3.2	9.7	0.0019	0.044
FLYBASE;FBgn0063447;accord.	1.1	5.7	9.1	0.0026	0.051
FLYBASE;FBgn0005384;3S18.	-0.68	6.6	7.8	0.0051	0.086
FLYBASE;FBgn0063369;transib4.	1.2	0.36	6.4	0.011	0.17
FLYBASE;FBgn0000155;roo.	0.77	9.7	5.8	0.016	0.21
FLYBASE;FBgn0040267;Transpac.	0.8	6.9	5.6	0.018	0.22
FLYBASE;FBgn0063455;Stalker2.	-0.68	4	5.4	0.02	0.22
FLYBASE;FBgn0026416;INE-1.	0.95	-0.81	4.7	0.03	0.29
FLYBASE;FBgn0003490;springer.	0.56	6.9	3.5	0.062	0.54
FLYBASE;FBgn0041728;Rt1a.	1.3	-2	3.4	0.064	0.54
FLYBASE;FBgn0067386;gypsy11.	1.1	-0.44	2.6	0.11	0.78
FLYBASE;FBgn0000349;copia.	0.55	13	2.5	0.11	0.78
FLYBASE;FBgn0069340;Tc1-2.	0.49	3	2.5	0.11	0.78
FLYBASE;FBgn0005773;Bari1.	0.42	1.7	2.4	0.13	0.78
FLYBASE;FBgn0067405;R1-2.	-0.88	-0.24	2.3	0.13	0.78
FLYBASE;FBgn0004082;Tirant.	-0.52	3.6	2.2	0.14	0.78
FLYBASE;FBgn0023131;ZAM.	0.79	-1.2	2.2	0.14	0.78
FLYBASE;FBgn0063429;invader2.	0.57	3.4	1.8	0.18	0.9
FLYBASE;FBgn0002949;NOF.	0.57	0.65	1.7	0.19	0.9
FLYBASE;FBgn0003055;P-element.	0.27	3.2	1.7	0.19	0.9
FLYBASE;FBgn0002697;mdg1.	0.38	4.7	1.7	0.19	0.9
FLYBASE;FBgn0014947;flea.	0.33	7.2	1.6	0.2	0.9
FLYBASE;FBgn0061191;Tc3.	0.58	0.46	1.4	0.23	0.98
FLYBASE;FBgn0005673;1360.	0.34	4.7	1.3	0.25	0.98
FLYBASE;FBgn0020425;Helena.	0.6	1.6	1.2	0.27	0.98
FLYBASE;FBgn0063427;invader4.	-0.52	3.4	1.2	0.27	0.98
FLYBASE;FBgn0004905;S-element.	0.32	2.4	1.2	0.28	0.98
FLYBASE;FBgn0003908;R1A1-element.	-0.38	5.1	1.2	0.28	0.98
FLYBASE;FBgn0000199;blood.	0.28	6.2	1.1	0.29	0.98
FLYBASE;FBgn0000006;412.	0.3	5	1.1	0.29	0.98
FLYBASE;FBgn0067387;gypsy10.	0.43	2.1	1.1	0.3	0.98
FLYBASE;FBgn0042231;X-element.	-0.42	4.2	1	0.31	0.98
FLYBASE;FBgn0063371;transib2.	0.45	1.8	1	0.31	0.98
FLYBASE;FBgn0063466;S2.	-0.58	-0.68	1	0.32	0.98
FLYBASE;FBgn0061485;rover.	-0.3	3	0.9	0.34	0.98
FLYBASE;FBgn0067385;invader6.	0.45	1.6	0.82	0.36	0.98
FLYBASE;FBgn0022937;Circe.	0.38	1.8	0.81	0.37	0.98
FLYBASE;FBgn0063505;G4.	0.34	1.3	0.78	0.38	0.98
FLYBASE;FBgn0063897;Stalker4.	0.25	5.3	0.77	0.38	0.98
FLYBASE;FBgn0067381;hopper2.	-0.5	-0.51	0.74	0.39	0.98
FLYBASE;FBgn0064134;Bari2.	0.51	-0.0044	0.72	0.4	0.98
FLYBASE;FBgn0063440;baggins.	-0.42	3.8	0.7	0.4	0.98
FLYBASE;FBgn0063432;gypsy5.	-0.34	0.79	0.69	0.41	0.98
FLYBASE;FBgn0000004;17.6.	0.24	6.2	0.63	0.43	0.98
FLYBASE;FBgn0046110;Juan.	0.26	3.3	0.63	0.43	0.98
FLYBASE;FBgn0010103;aurora-element.	-0.5	1.7	0.61	0.43	0.98
FLYBASE;FBgn0004141;HeT-A.	-0.19	4.4	0.6	0.44	0.98
FLYBASE;FBgn0000224;BS.	0.24	3.8	0.58	0.45	0.98
FLYBASE;FBgn0067383;gypsy8.	-0.32	0.037	0.52	0.47	0.98
FLYBASE;FBgn0063435;gypsy2.	-0.33	2.9	0.51	0.48	0.98
FLYBASE;FBgn0063431;gypsy6.	-0.33	2.8	0.49	0.48	0.98
FLYBASE;FBgn0042682;Rt1b.	-0.23	6	0.48	0.49	0.98
FLYBASE;FBgn0026443;Dyak\TART.	-0.23	5.8	0.43	0.51	0.98
FLYBASE;FBgn0000005;297.	0.21	6.6	0.39	0.53	0.98
FLYBASE;FBgn0063534;Doc2-element.	-0.27	4	0.38	0.54	0.98
FLYBASE;FBgn0063450;Tom1.	0.23	-0.37	0.36	0.55	0.98
FLYBASE;FBgn0043055;Ivk.	-0.28	2.3	0.35	0.55	0.98
FLYBASE;FBgn0063504;G5.	-0.27	2.7	0.34	0.56	0.98
FLYBASE;FBgn0044355;Quasimodo.	0.21	5.3	0.31	0.58	0.98
FLYBASE;FBgn0063507;G2.	-0.26	1.1	0.28	0.6	0.98
FLYBASE;FBgn0063467;Rt1c.	-0.28	0.12	0.26	0.61	0.98
FLYBASE;FBgn0063401;mariner2.	-0.21	1.2	0.25	0.61	0.98
FLYBASE;FBgn0069433;G5A.	0.2	1.8	0.25	0.62	0.98
FLYBASE;FBgn0014967;hopper.	0.19	2.1	0.23	0.63	0.98
FLYBASE;FBgn0069343;TAHRE.	-0.12	4.5	0.22	0.64	0.98
FLYBASE;FBgn0067382;gypsy9.	0.32	-1.4	0.22	0.64	0.98
FLYBASE;FBgn0015786;Porto1.	0.21	0.6	0.19	0.66	0.98
FLYBASE;FBgn0001181;HB.	0.14	2.1	0.18	0.67	0.98
FLYBASE;FBgn0003909;R2-element.	-0.13	8.5	0.16	0.69	0.98
FLYBASE;FBgn0063594;Cr1a.	0.16	5.1	0.16	0.69	0.98
FLYBASE;FBgn0043969;diver.	0.15	3.5	0.15	0.7	0.98
FLYBASE;FBgn0003122;pogo.	0.12	4.1	0.14	0.71	0.98
FLYBASE;FBgn0015945;GATE.	-0.16	3.9	0.14	0.71	0.98
FLYBASE;FBgnnnnnnnn;HMS-Beagle2.	0.14	4.3	0.12	0.72	0.98
FLYBASE;FBgn0067420;Fw3.	0.18	-1.5	0.12	0.73	0.98
FLYBASE;FBgn0067385;gypsy12.	-0.11	1.9	0.11	0.74	0.98
FLYBASE;FBgn0001207;HMS-Beagle.	0.089	5.8	0.11	0.74	0.98
FLYBASE;FBgn0063439;diver2.	-0.16	3.4	0.11	0.74	0.98
FLYBASE;FBgn0045970;Tabor.	0.13	3.3	0.1	0.75	0.98
FLYBASE;FBgn0067421;Fw2.	-0.19	0.64	0.097	0.76	0.98
FLYBASE;FBgn0002698;mdg3.	0.11	4.7	0.091	0.76	0.98
FLYBASE;FBgn0063394;rooA.	-0.091	5.4	0.091	0.76	0.98
FLYBASE;FBgn0026410;Tc1.	0.11	2.7	0.09	0.76	0.98
FLYBASE;FBgn0026065;Idefix.	0.1	4.7	0.082	0.77	0.98
FLYBASE;FBgn0063506;G3.	-0.16	-0.53	0.079	0.78	0.98
FLYBASE;FBgn0003519;Stalker.	-0.077	4.9	0.075	0.78	0.98
FLYBASE;FBgn0061513;frogger.	-0.16	0.91	0.074	0.79	0.98
FLYBASE;FBgn0015168;Dsim\ninja.	-0.15	2.2	0.07	0.79	0.98
FLYBASE;FBgn0067384;gypsy7.	0.13	2.2	0.067	0.8	0.98
FLYBASE;FBgn0067624;BS3.	-0.12	0.98	0.066	0.8	0.98
FLYBASE;FBgn0069587;Doc4-element.	-0.13	0.073	0.058	0.81	0.98
FLYBASE;FBgn0063434;gypsy3.	0.11	2.3	0.044	0.83	0.98
FLYBASE;FBgn0063372;transib1.	0.14	0.0083	0.039	0.84	0.98
FLYBASE;FBgn0063402;looper1.	-0.11	-0.71	0.039	0.84	0.98
FLYBASE;FBgn0000481;Doc.	0.058	6.6	0.038	0.84	0.98
FLYBASE;FBgn0063533;Doc3-element.	-0.087	4.7	0.034	0.85	0.98
FLYBASE;FBgn0063917;McClintock.	-0.084	1.4	0.031	0.86	0.98
FLYBASE;FBgn0063430;invader1.	-0.086	2.7	0.03	0.86	0.98
FLYBASE;FBgn0010302;Burdock.	-0.068	6.1	0.029	0.86	0.98
FLYBASE;FBgn0000007;1731.	0.071	3.8	0.024	0.88	0.99
FLYBASE;FBgn0062343;Dm88.	0.036	2.1	0.0047	0.95	1
FLYBASE;FBgn0001210;hobo.	0.023	3.4	0.0045	0.95	1
FLYBASE;FBgn0001167;gypsy.	-0.019	8.5	0.004	0.95	1
FLYBASE;FBgn0063428;invader3.	-0.02	2.3	0.0023	0.96	1
FLYBASE;FBgn0063370;transib3.	-0.017	1.9	0.0023	0.96	1
FLYBASE;FBgn0001283;jockey.	-0.011	6.5	0.0021	0.96	1
FLYBASE;FBgn0063782;accord2.	-0.017	2.2	0.0017	0.97	1
FLYBASE;FBgn0000652;F-element.	-0.012	5.3	0.00074	0.98	1
FLYBASE;FBgn0063436;gtwin.	-0.0083	5.3	0.00074	0.98	1
FLYBASE;FBgn0063433;gypsy4.	0.0075	5.1	0.00025	0.99	1
FLYBASE;FBgn0063919;Max-element.	0.0041	8	0.00021	0.99	1
FLYBASE;FBgn0063425;jockey2.	0.0018	1	1.7e-05	1	1
FLYBASE;FBgn0003007;opus.	-0.00063	7.3	6e-06	1	1

[truncated: 11 more sheets: DPMvsWTM_Gut, interaction_Brain, DPPvsWTP_Brain, DPPvsDPM_Brain, WTPvsWTM_Brain, DPMvsWTM_Brain, interaction_Thorax, DPPvsWTP_Thorax, DPPvsDPM_Thorax, WTPvsWTM_Thorax, DPMvsWTM_Thorax]
